# Supplementary material for: A novel live-cell imaging assay reveals regulation of endosome maturation
Source: PubMed Central journal article supplement (PMC8635980; doi:10.7554/elife.70982), 2021-11-30
Supplement: elife-70982-fig12-figsupp2-data1.pdf [file elife-70982-fig12-figsupp2-data1.pdf]

# Originals

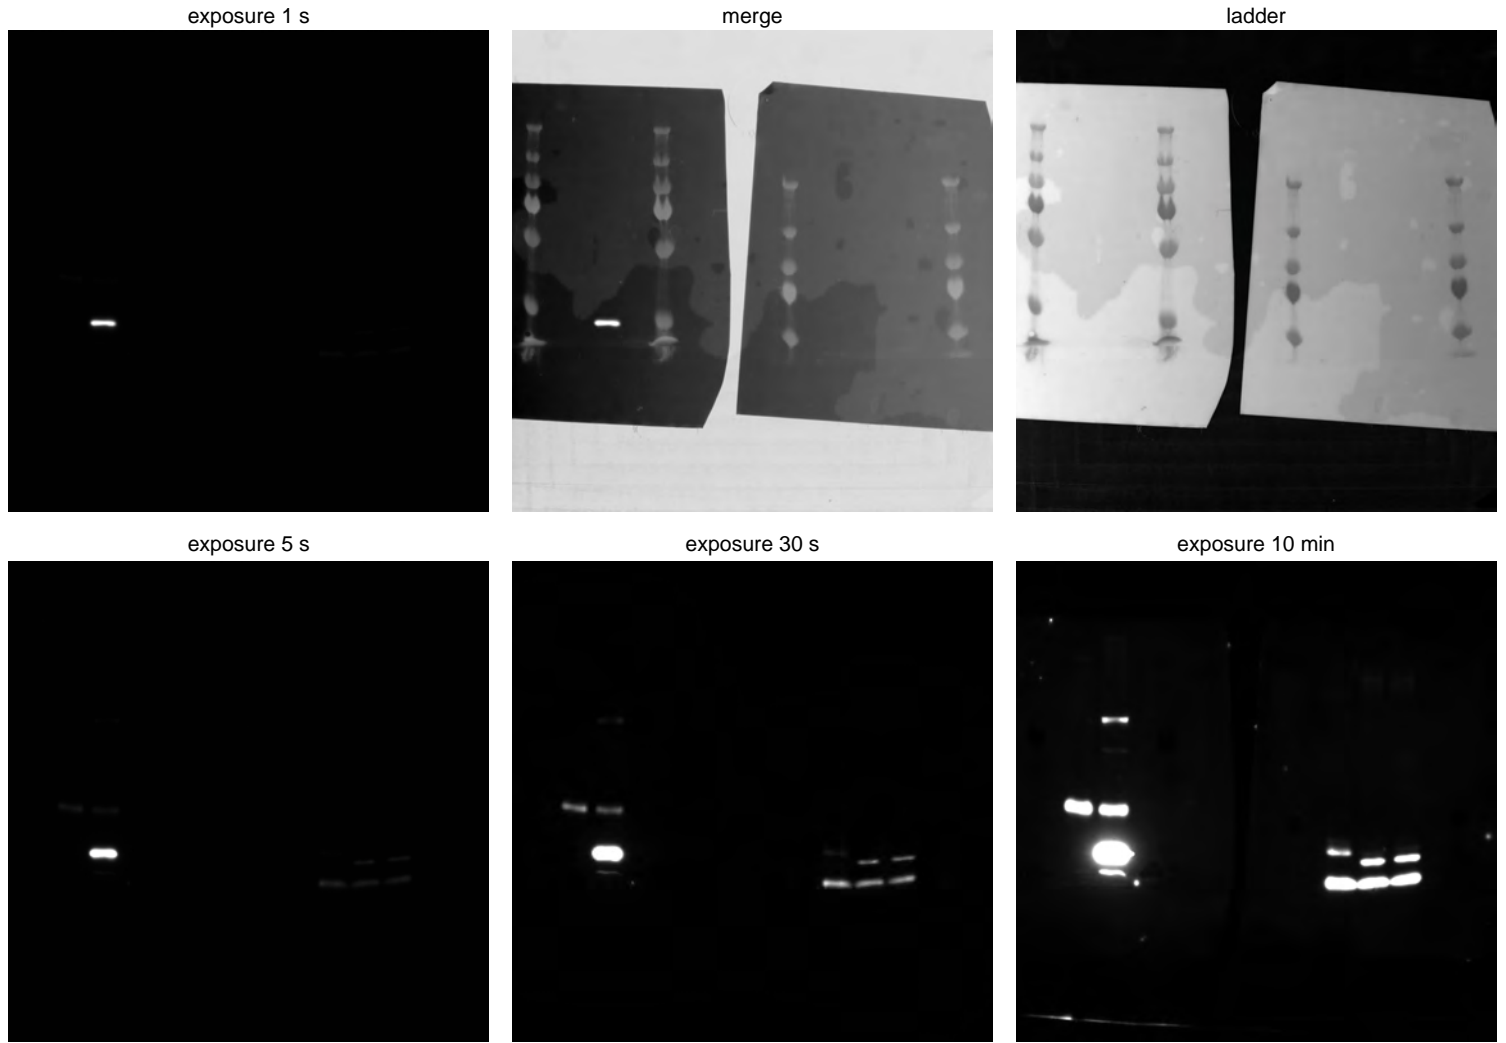

# Annotated

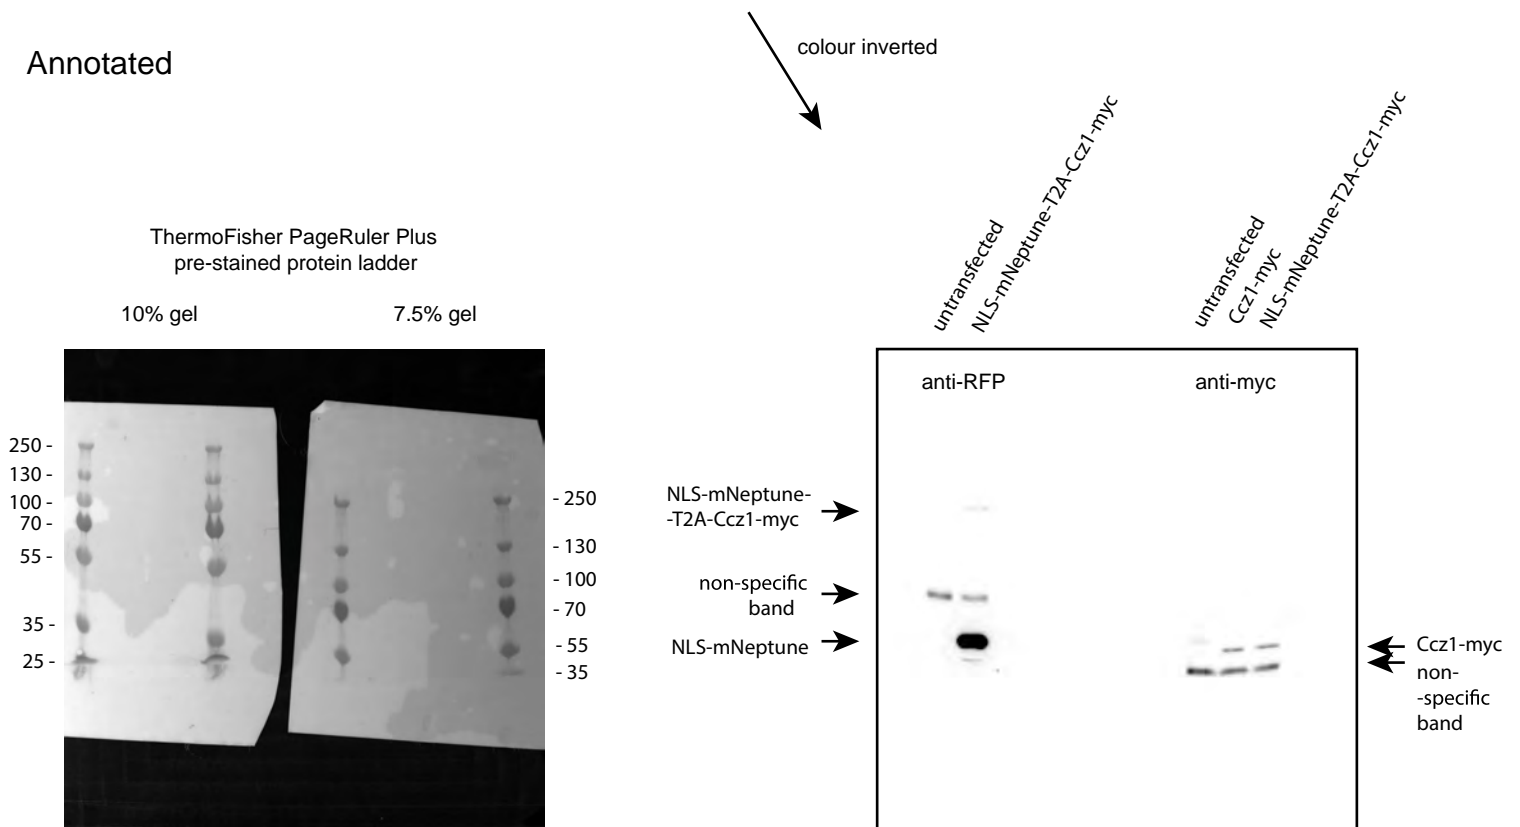

Membranes were first stained with anti-RFP / anti-myc.

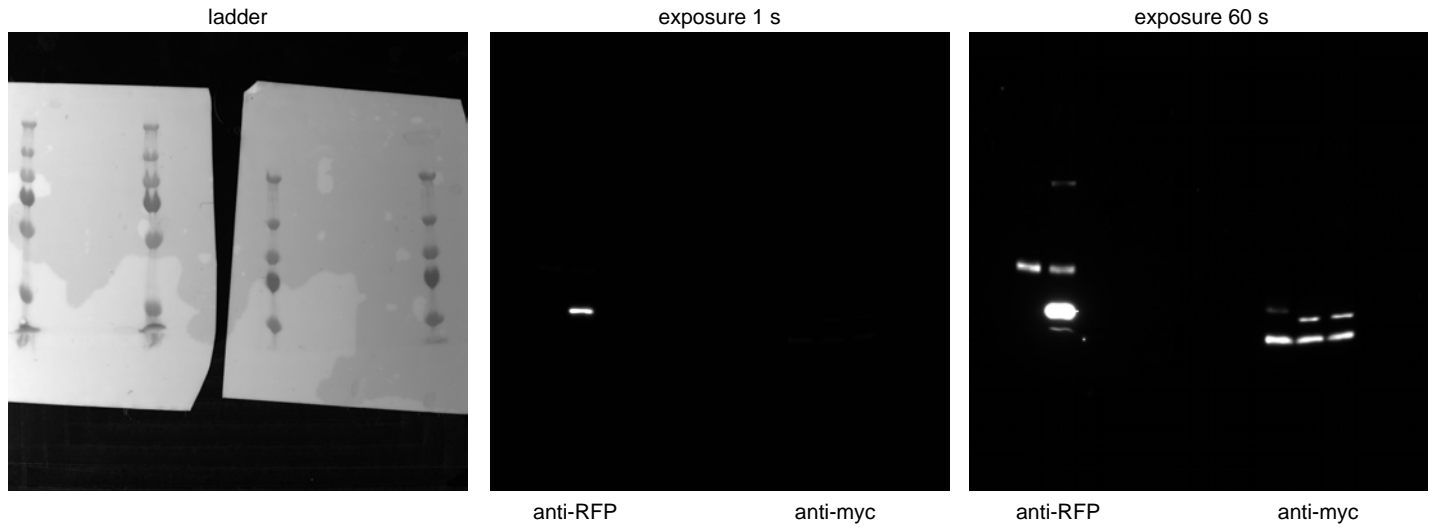

Membranes were subsequently stained with anti-actin without stripping. Actin staining is a lot stronger, so the additional band appears at short exposure.

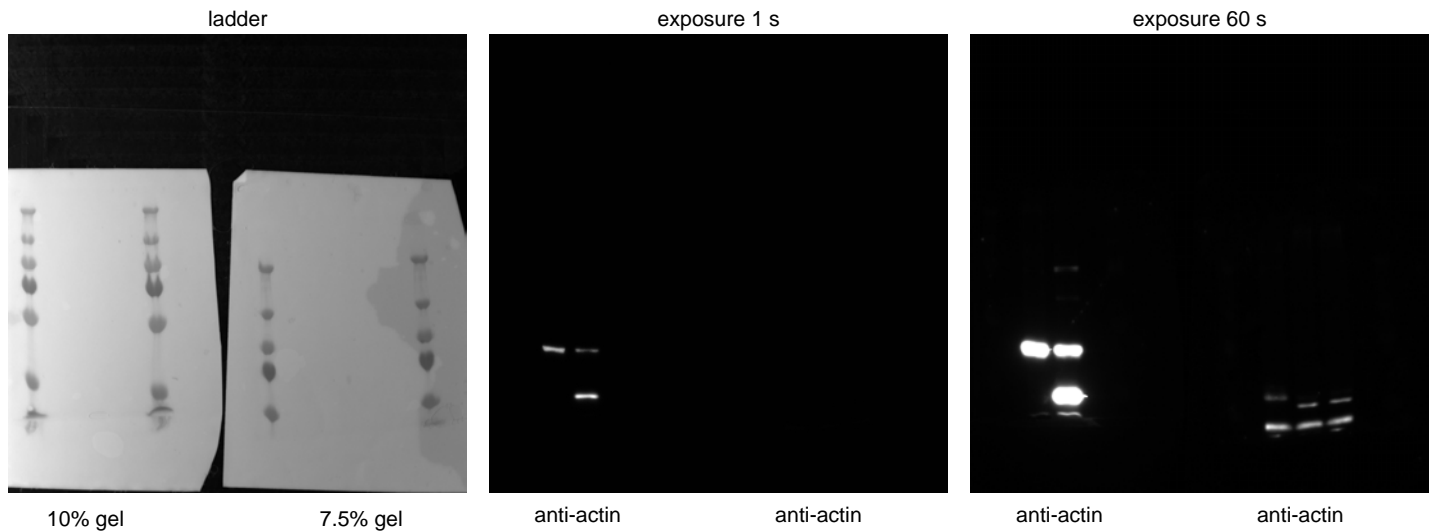

ThermoFisher PageRuler Plus pre-stained protein ladder

colour inverted

colour inverted

untransfected  
NLS-mNeptune-T2A-Ccz1-myc

untransfected  
Ccz1-myc  
NLS-mNeptune-T2A-Ccz1-myc

untransfected  
NLS-mNeptune-T2A-Ccz1-myc

untransfected  
Ccz1-myc  
NLS-mNeptune-T2A-Ccz1-myc

250 -  
130 -  
100 -  
70 -  
55 -  
actin →  
NLS-mNeptune →  
35 -  
25 -

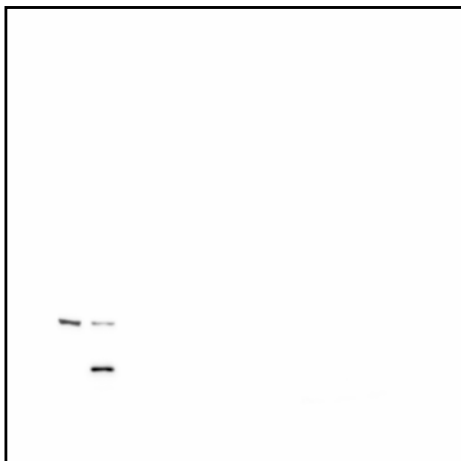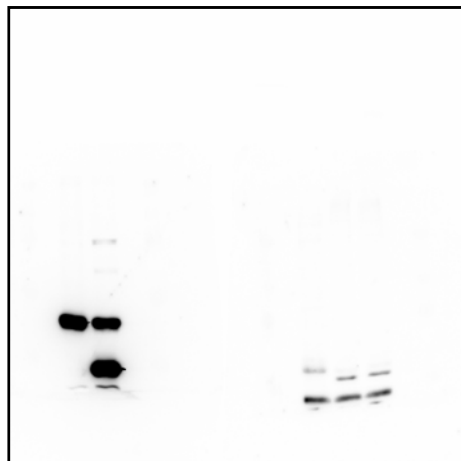

- 250  
- 130  
- 100  
- 70  
- 55 ← Ccz1-myc  
- 35 ← non-specific band  
actin

Actin partially ran off the gel, but the non-specific band shows equal loading.
