# Supplementary material for: A novel live-cell imaging assay reveals regulation of endosome maturation
Source: eLife. 2021 Nov 30;10:e70982. doi: 10.7554/eLife.70982 (PMC8635980; doi:10.7554/eLife.70982)
Supplement: Figure 2—figure supplement 1—source data 1. [file elife-70982-fig2-figsupp1-data1.xlsx]

## Sheet: experiment 1
		cell conc. 10^5/mL
	time (h)	no treatment			Nigericin
10:20:00	0	1.16	1.385	0.588				100uL
09:40:00	23.7	2.19	1.75	1.31	1.5	0.985	1.15	200uL
09:50:00	47.5	4.19	4.71	6.32	2.96	3.04	4.87	200uL
08:50:00	71	11.2	12.8	12.4	8.97	7.06	7.52	200uL
		total cells x10^4
	time (h)	no treatment			Nigericin
	0	1.16	1.385	0.588
	23.7	4.38	3.5	2.62	3	1.97	2.3
	48	8.38	9.42	12.64	5.92	6.08	9.74
	71	22.4	25.6	24.8	17.94	14.12	15.04
		time (h)	0	23.7	47.5	70
		no treatment	1.16	4.38	8.38	22.4
			1.385	3.5	9.42	25.6
			0.588	2.62	12.64	24.8
		Nigericin	1.16	3	5.92	17.94
			1.385	1.97	6.08	14.12
			0.588	2.3	9.74	15.04
		no treatment average	1.04433	3.5	10.1467	24.2667
		nigericin average	1.04433	2.42333	7.24667	15.7
		average
		time (h)	0	23.7	48	70
		no treatment	1.04433	3.5	10.1467	24.2667
		nigericin	1.04433	2.42333	7.24667	15.7
		doubling time	time (h)	24	48	70
			no treatment	13.5834	15.8246	17.4885
			nigericin	19.5156	15.3766	19.7243

## Sheet: experiment 2
cell count		cell conc. 10^5/mL
		no treatment			Nigericin
14:50:00		4.21						200uL
14:05:00		13.9	11.3	13	9.49	12.9	12.5	200uL
12:40:00		33.5	30.9	36.3	23	22.2	23.3	200uL
		total cells x10^4
	time (h)	no treatment			Nigericin
	0	8.42
	23.25	27.8	22.6	26	18.98	25.8	25
	46.75	67	61.8	72.6	46	44.4	46.6
		time (h)	0	23.25	46.75
		no treatment	8.42	27.8	67
				22.6	61.8
				26	72.6
		Nigericin	8.42	18.98	46
				25.8	44.4
				25	46.6
		no treatment average	8.42	25.4667	67.1333
		nigericin average	8.42	23.26	45.6667
		average
		time (h)	0	23.25	46.75
		no treatment	8.42	25.4667	67.1333
		nigericin	8.42	23.26	45.6667
		doubling time	time (h)	24	48
			no treatment	14.5611	16.8047
			nigericin	15.8599	24.1449

## Sheet: experiment 3
	total cells x10^4
time (h)	no treatment			Nigericin			no treatment average	nigericin average
0	1.422	0.936	1.146				1.168	1.168
24	3.88	1.642	4.6	3.12	3.78	4.44	3.374	3.78
54	17.28	17.08	14.52	10.08	14.12	14.76	16.2933	12.9867
70	28.44	35.56	46	20.48	22.32	26.04	36.6667	22.9467
	time (h)	0	24	54	70
	no treatment	1.422	3.88	17.28	28.44
		0.936	1.642	17.08	35.56
		1.146	4.6	14.52	46
	Nigericin	1.422	3.12	10.08	20.48
		0.936	3.78	14.12	22.32
		1.146	4.44	14.76	26.04
	no treatment average	1.168	3.374	16.2933	36.6667
	nigericin average	1.168	3.78	12.9867	22.9467
	time (h)	0	24	54	70
	no treatment	1.168	3.374	16.2933	36.6667
	nigericin	1.168	3.78	12.9867	22.9467
	doubling time	time (h)	24	54	70
		no treatment	15.682	13.2057	13.673
		nigericin	14.1648	16.8485	19.4824
