# Supplementary material for: A novel live-cell imaging assay reveals regulation of endosome maturation
Source: eLife. 2021 Nov 30;10:e70982. doi: 10.7554/eLife.70982 (PMC8635980; doi:10.7554/eLife.70982)
Supplement: Figure 4—source data 1. [file elife-70982-fig4-data1.xlsx]

## Sheet: exp1-endosome1
endosome #1							dMFI				%dMFI(min-max)
frame #	Rab5(rim)	Rab5(background)	Rab7(rim)	Rab7(background)		frame #	Rab5	Rab7		frame #	Rab5	Rab7
1	424.578	420.866	280.578	278.326		1	3.712	2.252		1	0.481091	0.180529
2	399.426	413.171	268.648	271.494		2	-13.745	-2.846		2	0.117744	0.123026
3	424.973	433.946	275.821	286.827		3	-8.973	-11.006		3	0.217067	0.0309849
4	409.652	413.554	278.304	281.048		4	-3.902	-2.744		4	0.322614	0.124177
5	407.88	421.95	269.898	282.988		5	-14.07	-13.09		5	0.110979	0.00747834
6	416.88	433.555	272.704	286.457		6	-16.675	-13.753		6	0.0567593	0
7	413.836	433.238	271.448	280.529		7	-19.402	-9.081		7	0	0.0526981
8	438.411	436.074	284.984	294.824		8	2.337	-9.84		8	0.452472	0.0441369
9	433.886	427.946	283.856	284.582		9	5.94	-0.726		9	0.527464	0.146939
10	446.922	445.628	287.828	286.728		10	1.294	1.1		10	0.430763	0.167535
11	480.669	452.026	313.316	285.615		11	28.643	27.701		11	1	0.467583
12	464.971	458.422	328.993	289.885		12	6.549	39.108		12	0.540139	0.596248
13	459.213	435.891	317.265	282.443		13	23.322	34.822		13	0.88925	0.547904
14	437.647	434.297	326.926	284.771		14	3.35	42.155		14	0.473556	0.630617
15	458.559	449.911	361.331	305.833		15	8.648	55.498		15	0.583828	0.78112
16	440.795	438.413	377.152	309.745		16	2.382	67.407		16	0.453408	0.915448
17	441.455	430.125	374.886	305.272		17	11.33	69.614		17	0.63965	0.940342
18	445.062	452.561	372.477	308.817		18	-7.499	63.66		18	0.247747	0.873184
19	440.25	447.898	385	310.097		19	-7.648	74.903		19	0.244646	1
20	440	459.074	362	305.312		20	-19.074	56.688		20	0.00682693	0.794543
21	417.266	425.25	350.5	300.409		21	-7.984	50.091		21	0.237652	0.720132
22	385.732	389.714	325.732	280.881		22	-3.982	44.851		22	0.320949	0.661027

## Sheet: exp1-endosome2
endosome #2							dMFI				%dMFI(min-max)
frame #	Rab5(rim)	Rab5(background)	Rab7(rim)	Rab7(background)		frame #	Rab5	Rab7		frame #	Rab5	Rab7
1	376.538	378.051	257.75	267.994		1	-1.513	-10.244		1	0.411409	0.0102504
2	371.74	374.558	261.202	267.372		2	-2.818	-6.17		2	0.386487	0.0721174
3	413.24	408.135	253.837	264.756		3	5.105	-10.919		3	0.537793	0
4	376.13	376.5	256.093	261.463		4	-0.37	-5.37		4	0.433237	0.084266
5	375.867	370.688	269.817	265.08		5	5.179	4.737		5	0.539206	0.237749
6	383	375.165	274.783	269.318		6	7.835	5.465		6	0.589928	0.248804
7	383.071	372.839	257.795	258.024		7	10.232	-0.229		7	0.635704	0.162336
8	375.267	365.872	258.991	259.017		8	9.395	-0.026		8	0.61972	0.165419
9	380.176	378.988	253.787	255.53		9	1.188	-1.743		9	0.46299	0.139345
10	408.677	389.506	262.621	252.898		10	19.171	9.723		10	0.806413	0.313465
11	379.556	380.983	255.476	246.125		11	-1.427	9.351		11	0.413051	0.307816
12	366.317	373.369	243.325	248.886		12	-7.052	-5.561		12	0.30563	0.0813655
13	365	374.05	254.226	263.056		13	-9.05	-8.83		13	0.267474	0.0317231
14	355.339	351.613	256.375	249.488		14	3.726	6.887		14	0.511458	0.270398
15	366.843	369.573	268.935	273.409		15	-2.73	-4.474		15	0.388167	0.0978725
16	361.519	363.049	268.611	272.482		16	-1.53	-3.871		16	0.411084	0.10703
17	358.793	365.029	268.586	270.494		17	-6.236	-1.908		17	0.321213	0.136839
18	363.3	358.812	266.717	257.097		18	4.488	9.62		18	0.52601	0.311901
19	374.457	365.186	275.129	266.448		19	9.271	8.681		19	0.617352	0.297642
20	421.948	392.64	292.716	275.041		20	29.308	17.675		20	1	0.434223
21	354.038	363.859	288.26	256.699		21	-9.821	31.561		21	0.25275	0.645093
22	322.652	335.405	287.911	244.06		22	-12.753	43.851		22	0.196757	0.831726
23	341.556	349.444	313.704	263.363		23	-7.888	50.341		23	0.289665	0.930282
24	356.861	367.177	313.972	261.75		24	-10.316	52.222		24	0.243297	0.958846
25	354.731	371.299	312.759	266.384		25	-16.568	46.375		25	0.123902	0.870055
26	342.76	365.816	324.86	269.928		26	-23.056	54.932		26	0	1
27	362.519	365.615	315.019	274.462		27	-3.096	40.557		27	0.381178	0.781704
28	357.73	361.545	318.3	266.763		28	-3.815	51.537		28	0.367447	0.948444
29	361.75	373.697	311.312	278.039		29	-11.947	33.273		29	0.21215	0.671091
30	375.761	374.831	316.413	269.797		30	0.93	46.616		30	0.458063	0.873715

## Sheet: exp1-endosome3
endosome #3							dMFI				%dMFI(min-max)
frame #	Rab5(rim)	Rab5(background)	Rab7(rim)	Rab7(background)		frame #	Rab5	Rab7		frame #	Rab5	Rab7
92	365.691	332.919	269.059	257.524		92	32.772	11.535		92	0.793652	0
93	339.816	324.182	275.118	249.008		93	15.634	26.11		93	0.451309	0.357038
94	380.191	337.089	297	251.202		94	43.102	45.798		94	1	0.839327
95	361.922	358.225	294.062	250.542		95	3.697	43.52		95	0.21286	0.783524
96	353.567	335.268	301.917	257.366		96	18.299	44.551		96	0.504544	0.80878
97	344.75	344.065	308.288	269.417		97	0.685	38.871		97	0.152694	0.669639
98	327.55	334.509	317.417	265.06		98	-6.959	52.357		98	0	1
99	372	351.65	317.141	278.833		99	20.35	38.308		99	0.545514	0.655847

## Sheet: exp1-endosome4
endosome #4							dMFI				%dMFI(min-max)
frame #	Rab5(rim)	Rab5(background)	Rab7(rim)	Rab7(background)		frame #	Rab5	Rab7		frame #	Rab5	Rab7
13	329.81	336.691	238.452	237.441		13	-6.881	1.011		13	0	0
14	376.337	330.735	238.037	231.932		14	45.602	6.105		14	1	0.192962
15	366.013	330	235.25	232.939		15	36.013	2.311		15	0.817293	0.0492443
16	354.461	326.5	246.25	232.341		16	27.961	13.909		16	0.663872	0.488579
17	353.237	326.864	257.566	241.076		17	26.373	16.49		17	0.633615	0.586348
18	358.132	331.75	265.079	238.053		18	26.382	27.026		18	0.633786	0.985454
19	347	334.636	263.184	237.727		19	12.364	25.457		19	0.36669	0.92602
20	339.132	334.061	260.039	233.917		20	5.071	26.122		20	0.227731	0.95121
21	323.566	319.008	259.842	232.432		21	4.558	27.41		21	0.217956	1

## Sheet: exp1-endosome5
endosome #5							dMFI				%dMFI(min-max)
frame #	Rab5(rim)	Rab5(background)	Rab7(rim)	Rab7(background)		frame #	Rab5	Rab7		frame #	Rab5	Rab7
17	277.403	282.585	202.508	205.205		17	-5.182	-2.697		17	0.162511	0.0239232
18	273.067	275.489	200.95	198.148		18	-2.422	2.802		18	0.236907	0.174787
19	273.964	281.167	198.804	199.946		19	-7.203	-1.142		19	0.108035	0.0665844
20	283.21	288.347	201.016	204.585		20	-5.137	-3.569		20	0.163724	0
21	268.241	275.529	206.336	199.907		21	-7.288	6.429		21	0.105744	0.274294
22	267.419	268.932	212.427	208.807		22	-1.513	3.62		22	0.261409	0.197229
23	265.694	266.489	207.04	198.182		23	-0.795	8.858		23	0.280762	0.340933
24	265.492	263.96	200.968	194.705		24	1.532	6.263		24	0.343486	0.269739
25	267.542	267.778	203.542	195.739		25	-0.236	7.803		25	0.29583	0.311989
26	301.655	275.767	216.052	201.907		26	25.888	14.145		26	1	0.485981
27	280.819	272.244	219.698	203.471		27	8.575	16.227		27	0.53333	0.5431
28	263.121	271.395	233.379	210.494		28	-8.274	22.885		28	0.0791666	0.725761
29	276.19	272.924	239.302	209.157		29	3.266	30.145		29	0.390226	0.924938
30	270.034	269.994	242.026	209.145		30	0.04	32.881		30	0.30327	1
31	274.759	269.863	238.438	216.042		31	4.896	22.396		31	0.434163	0.712346
32	265.241	269.656	237.102	212.681		32	-4.415	24.421		32	0.183186	0.767901
33	265.12	256.634	233.648	211.646		33	8.486	22.002		33	0.530931	0.701536
34	262.213	259.268	237.481	215.22		34	2.945	22.261		34	0.381574	0.708642
35	250.68	259.671	232.72	208.441		35	-8.991	24.279		35	0.0598399	0.764005
36	254.94	266.151	227.92	206.632		36	-11.211	21.288		36	0	0.681948
37	280	266.957	230.722	210.872		37	13.043	19.85		37	0.653764	0.642497
38	273.926	267.335	221.343	212.159		38	6.591	9.184		38	0.479851	0.349877

## Sheet: exp1-endosome6
endosome #6							dMFI				%dMFI(min-max)
frame #	Rab5(rim)	Rab5(background)	Rab7(rim)	Rab7(background)		frame #	Rab5	Rab7		frame #	Rab5	Rab7
110	333.312	332.204	214.25	205.428		110	1.108	8.822		110	0.228955	0.444585
111	339	339.592	213.031	212.625		111	-0.592	0.406		111	0.188542	0
112	385.683	352.141	220.933	212.468		112	33.542	8.465		112	1	0.425726
113	357.452	350.763	229.192	216.885		113	6.689	12.307		113	0.361631	0.628685
114	366.466	358.843	231.009	216.453		114	7.623	14.556		114	0.383835	0.747491
115	353.837	356.019	228.894	209.558		115	-2.182	19.336		115	0.150743	1
116	360.183	368.237	223.519	213.551		116	-8.054	9.968		116	0.0111494	0.505124
117	359.898	354.683	215.546	207.774		117	5.215	7.772		117	0.32659	0.389118
118	358.713	363.622	221.88	213.591		118	-4.909	8.289		118	0.0859147	0.416429
119	366.667	365.335	230.525	212.574		119	1.332	17.951		119	0.23428	0.926836
120	361.875	360.083	221.607	206.524		120	1.792	15.083		120	0.245216	0.77533
121	365.602	359.475	234.731	215.594		121	6.127	19.137		121	0.348271	0.989488
122	352.817	361.34	230.51	216.135		122	-8.523	14.375		122	0	0.737929

## Sheet: exp1-endosome7
endosome #7							dMFI				%dMFI(min-max)
frame #	Rab5(rim)	Rab5(background)	Rab7(rim)	Rab7(background)		frame #	Rab5	Rab7		frame #	Rab5	Rab7
81	279.509	283.976	173.231	173.61		81	-4.467	-0.379		81	0.183663	0.0984276
82	285.38	293.311	173.046	175.5		82	-7.931	-2.454		82	0.10863	0.0136818
83	268.37	274.22	168.296	171.085		83	-5.85	-2.789		83	0.153706	0
84	271.958	274.227	168.633	171.392		84	-2.269	-2.759		84	0.231274	0.00122524
85	278.444	279.67	172.984	171.307		85	-1.226	1.677		85	0.253866	0.182397
86	294.734	291.034	177.266	175.045		86	3.7	2.221		86	0.360568	0.204615
87	297.161	296.949	178.194	178.051		87	0.212	0.143		87	0.285015	0.119747
88	312.048	303.562	181.984	177.994		88	8.486	3.99		88	0.464238	0.276863
89	307.79	302.506	187.065	178.193		89	5.284	8.872		89	0.394879	0.476251
90	300.806	304.659	183.065	179.188		90	-3.853	3.877		90	0.196963	0.272248
91	306.793	306.122	183.31	179.087		91	0.671	4.223		91	0.294957	0.286379
92	318.44	322.238	187.741	181.919		92	-3.798	5.822		92	0.198154	0.351685
93	306.922	308.983	186.422	180.978		93	-2.061	5.444		93	0.23578	0.336247
94	316.04	311.972	189.903	182.125		94	4.068	7.778		94	0.36854	0.43157
95	322.798	313.597	193.629	185.148		95	9.201	8.481		95	0.479725	0.460282
96	341.113	323.062	200.774	191.443		96	18.051	9.331		96	0.671425	0.494997
97	357.017	323.797	207.966	197.686		97	33.22	10.28		97	1	0.533755
98	341.672	324.942	213.819	197.372		98	16.73	16.447		98	0.642811	0.785624
99	336.25	319.471	215.845	199.715		99	16.779	16.13		99	0.643872	0.772677
100	333.37	325.104	218.167	203.25		100	8.266	14.917		100	0.459472	0.723137
101	341.167	335.488	223.62	206.921		101	5.679	16.699		101	0.403435	0.795916
102	352.482	340.72	225.839	208.94		102	11.762	16.899		102	0.535199	0.804084
103	358.713	350.256	221.5	209.951		103	8.457	11.549		103	0.46361	0.585583
104	340.87	353.816	222.88	215.059		104	-12.946	7.821		104	0	0.433327
105	342.157	338.938	221.843	207.075		105	3.219	14.768		105	0.350149	0.717051
106	350.111	359.5	233.657	215.119		106	-9.389	18.538		106	0.077048	0.871023
107	345.648	347.512	230.639	216.787		107	-1.864	13.852		107	0.240047	0.679641
108	355.295	349.131	239.607	217.911		108	6.164	21.696		108	0.413941	1
109	357.917	348.156	238.806	219.713		109	9.761	19.093		109	0.491855	0.89369
110	358.13	355.069	231.926	217.088		110	3.061	14.838		110	0.346727	0.71991
111	351.028	341.594	229.139	216.781		111	9.434	12.358		111	0.484772	0.618624
112	352.019	347.801	236.385	219.513		112	4.218	16.872		112	0.371789	0.802981
113	362.692	346.859	237.894	218.647		113	15.833	19.247		113	0.623381	0.89998
114	341.51	340.125	227.07	215.592		114	1.385	11.478		114	0.310423	0.582683
115	339.239	336.528	231.761	220.938		115	2.711	10.823		115	0.339146	0.555932

## Sheet: exp1-endosome8
endosome #8							dMFI				%dMFI(min-max)
frame #	Rab5(rim)	Rab5(background)	Rab7(rim)	Rab7(background)		frame #	Rab5	Rab7		frame #	Rab5	Rab7
52	384.807	392.778	267.489	268.389		52	-7.971	-0.9		52	0	0
53	401.216	395.118	286.398	269.896		53	6.098	16.502		53	0.168104	0.361517
54	396.08	401.014	265.534	259.264		54	-4.934	6.27		54	0.0362878	0.148953
55	395.477	388.361	266.227	261.465		55	7.116	4.762		55	0.180268	0.117625
56	409.552	397.02	279.25	263.941		56	12.532	15.309		56	0.244982	0.336733
57	435.594	405.908	305.99	292.23		57	29.686	13.76		57	0.449947	0.304554
58	511.083	435.362	317.26	287.901		58	75.721	29.359		58	1	0.628615
59	465.74	419.487	324.448	298.875		59	46.253	25.573		59	0.647899	0.549963
60	453.625	421.73	332.583	308.822		60	31.895	23.761		60	0.476342	0.512319
61	441.812	415.5	348.646	302.52		61	26.312	46.126		61	0.409633	0.97694
62	421.772	421.081	356.837	309.601		62	0.691	47.236		62	0.103499	1

## Sheet: exp1-endosome9
endosome #9							dMFI				%dMFI(min-max)
frame #	Rab5(rim)	Rab5(background)	Rab7(rim)	Rab7(background)		frame #	Rab5	Rab7		frame #	Rab5	Rab7
70	345.282	345.909	284	279.028		70	-0.627	4.972		70	0.164378	0.103945
71	343.129	348.023	286.855	282.761		71	-4.894	4.094		71	0.120284	0.0932418
72	341.798	343.045	293.484	284.574		72	-1.247	8.91		72	0.157971	0.151949
73	333.879	342.824	278.581	282.136		73	-8.945	-3.555		73	0.0784223	0
74	332.5	337.835	284.508	284.301		74	-5.335	0.207		74	0.115727	0.045859
75	340.879	355.616	299.879	285.866		75	-14.737	14.013		75	0.0185696	0.214155
76	335.353	350.506	287.974	283.837		76	-15.153	4.137		76	0.0142708	0.093766
77	332.716	349.25	294.491	292.465		77	-16.534	2.026		77	0	0.0680328
78	340.573	334.375	291.363	277.682		78	6.198	13.681		78	0.234905	0.210108
79	348.613	333.938	302.653	283.847		79	14.675	18.806		79	0.322504	0.272582
80	343.153	331.455	300.903	280.909		80	11.698	19.994		80	0.29174	0.287064
81	370.379	345.169	303.957	286.919		81	25.21	17.038		81	0.431369	0.25103
82	387.026	332.57	309.836	281.587		82	54.456	28.249		82	0.733588	0.387693
83	432.353	352.116	304	285.145		83	80.237	18.855		83	1	0.273179
84	372.543	334.82	324.5	298.116		84	37.723	26.384		84	0.560674	0.364958
85	381.129	336.506	322.086	294.965		85	44.623	27.121		85	0.631977	0.373943
86	380.405	327.814	334.06	290.227		86	52.591	43.833		86	0.714315	0.577663
87	364.966	326.14	332.06	297.052		87	38.826	35.008		87	0.572072	0.470086
88	355.466	321.169	360.698	298.43		88	34.297	62.268		88	0.525271	0.802387
89	347.914	319.047	363.966	296.895		89	28.867	67.071		89	0.469159	0.860936
90	348.362	335.738	368.448	293.244		90	12.624	75.204		90	0.301309	0.960078
91	339.784	320.849	357.233	291.808		91	18.935	65.425		91	0.366525	0.840871
92	335.172	323.355	357.836	300.651		92	11.817	57.185		92	0.29297	0.740425
93	327.448	315.32	360.448	288.663		93	12.128	71.785		93	0.296184	0.9184
94	322.388	307.506	358.991	280.512		94	14.882	78.479		94	0.324643	1
95	316.214	307.238	350.339	273.756		95	8.976	76.583		95	0.263612	0.976888
96	303.509	295.456	319.722	259.269		96	8.053	60.453		96	0.254074	0.780262
97	320.087	304.545	303.692	258.981		97	15.542	44.711		97	0.331463	0.588366
98	299.696	299.135	297.12	265.588		98	0.561	31.532		98	0.176654	0.427713
99	305.17	306.097	288.58	263.014		99	-0.927	25.566		99	0.161278	0.354987

## Sheet: exp1-endosome10
endosome #10							dMFI				%dMFI(min-max)
frame #	Rab5(rim)	Rab5(background)	Rab7(rim)	Rab7(background)		frame #	Rab5	Rab7		frame #	Rab5	Rab7
81	390.533	375.223	307.239	296.297		81	15.31	10.942		81	0.226377	0
82	447.692	367.506	308.433	283.968		82	80.186	24.465		82	1	0.238425
83	413.288	354.269	328.288	301.821		83	59.019	26.467		83	0.747591	0.273723
84	400.471	346.942	338.952	283.494		84	53.529	55.458		84	0.682125	0.784865
85	406.096	353.84	354.769	287.109		85	52.256	67.66		85	0.666945	1
86	403.894	352.397	346.135	288.558		86	51.497	57.577		86	0.657894	0.822226
87	382.76	354.632	355.75	297.882		87	28.128	57.868		87	0.379227	0.827356
88	384.542	365.789	357.573	297.178		88	18.753	60.395		88	0.267434	0.87191
89	371.76	363.572	367.719	307.125		89	8.188	60.594		89	0.14145	0.875419
90	366.17	366.382	363.398	304.861		90	-0.212	58.537		90	0.0412831	0.839152
91	348.51	348.566	367.406	320.842		91	-0.056	46.564		91	0.0431433	0.628055
92	350.726	352.596	356.786	325.485		92	-1.87	31.301		92	0.021512	0.358951
93	356.212	359.886	329.4	318.061		93	-3.674	11.339		93	0	0.00699954

[truncated: 53 more sheets: exp1-endosome11, exp1-endosome12, exp1-endosome13, exp1-endosome14, exp1-endosome15, exp1-endosome16, exp1-endosome17, exp1-endosome18, exp1-endosome19, exp1-endosome20, exp1-endosome21, exp1-endosome22, exp1-endosome23, exp1-endosome24, exp1-endosome25, exp1-endosome26, exp1-endosome27, exp1-time, exp1-aligned, exp2-endosome1 …]
