# Supplementary material for: A novel live-cell imaging assay reveals regulation of endosome maturation
Source: eLife. 2021 Nov 30;10:e70982. doi: 10.7554/eLife.70982 (PMC8635980; doi:10.7554/eLife.70982)
Supplement: Figure 5—source data 1. [file elife-70982-fig5-data1.xlsx]

## Sheet: exp1-endosome1
endosome 1							dMFI				%dMFI
frame #	Rab5(rim)	Rab5(background)	FYVE(rim)	FYVE(background)		frame #	Rab5	FYVE		frame #	Rab5	FYVE
106	1127.71	1132.66	318.271	315.461		106	-4.956	2.81		106	0.132491	0.0159011
107	1114.64	1082.85	342.808	312.378		107	31.791	30.43		107	0.302651	0.135506
108	1198.37	1110.5	369.817	298.66		108	87.865	71.157		108	0.562307	0.311869
109	1153.33	1065.76	383.692	286.545		109	87.571	97.147		109	0.560946	0.424416
110	1137.16	1054.76	400.538	298.712		110	82.407	101.826		110	0.537033	0.444677
111	1122.95	1039.45	381.356	280.686		111	83.503	100.67		111	0.542108	0.439671
112	1181.96	1063.72	359.615	273.987		112	118.244	85.628		112	0.70298	0.374534
113	1131.48	1038.18	375.481	267.549		113	93.298	107.932		113	0.587465	0.471119
114	1060.33	993.583	435.048	274.641		114	66.744	160.407		114	0.464504	0.698355
115	1157.61	999.762	460.046	267.11		115	157.849	192.936		115	0.886374	0.839218
116	1112.55	995.268	450.454	268.177		116	117.278	182.277		116	0.698507	0.79306
117	1188.97	1049.9	467.676	301.866		117	139.076	165.81		117	0.799444	0.721752
118	1147.41	1017.99	441.574	295.085		118	129.413	146.489		118	0.754699	0.638085
119	1120.59	1008.4	391.87	269.006		119	112.191	122.864		119	0.674951	0.53578
120	1182.07	1019.37	317.371	255.802		120	162.703	61.569		120	0.908851	0.27035
121	1134.06	1000.12	462.69	278.576		121	133.938	184.114		121	0.775652	0.801015
122	1221.8	1072.69	520.638	306.151		122	149.11	214.487		122	0.845908	0.932541
123	1227.92	1058.94	543.612	313.547		123	168.98	230.065		123	0.937918	1
124	1194.29	1057.94	474.5	308.957		124	136.348	165.543		124	0.786812	0.720596
125	1188.74	1006.35	411.796	284.512		125	182.387	127.284		125	1	0.55492
126	1188.9	1011.94	430.981	304.787		126	176.959	126.194		126	0.974865	0.5502
127	1057.04	965.604	350.481	281.835		127	91.433	68.646		127	0.578829	0.300996
128	1024.93	1024.68	325.26	304.846		128	0.254	20.414		128	0.156616	0.092133
129	985.317	1018.88	293.375	294.237		129	-33.568	-0.862		129	0	0
130	977.663	987.147	300.962	298.712		130	-9.484	2.25		130	0.111523	0.0134761
131	970.712	987.417	310.712	284.276		131	-16.705	26.436		131	0.0780857	0.118211

## Sheet: exp1-endosome2
endosome 2							dMFI				%dMFI
frame #	Rab5(rim)	Rab5(background)	FYVE(rim)	FYVE(background)		frame #	Rab5	FYVE		frame #	Rab5	FYVE
106	1392.7	1481.95	302.419	341.79		106	-89.253	-39.371		106	0.243789	0.00506614
107	1350.93	1432.05	347.962	325.94		107	-81.117	22.022		107	0.273698	0.228184
108	1396.32	1425.31	393.463	359.24		108	-28.996	34.223		108	0.465304	0.272525
109	1404.38	1415.4	483.069	385.52		109	-11.03	97.549		109	0.53135	0.502668
110	1494.27	1400.11	377.039	291.059		110	94.157	85.98		110	0.918036	0.460623
111	1405.9	1354.03	553.901	338.887		111	51.872	215.014		111	0.762589	0.929565
112	1406.55	1354.78	584.434	350.039		112	51.767	234.395		112	0.762203	1
113	1475.62	1359.17	527.684	330.02		113	116.453	197.664		113	1	0.86651
114	1327.78	1285.29	487.375	313.601		114	42.495	173.774		114	0.728118	0.779688
115	1334.43	1307.96	465.283	313		115	26.471	152.283		115	0.669211	0.701585
116	1346.31	1277.24	456.994	290.349		116	69.063	166.645		116	0.825786	0.75378
117	1319.45	1268.02	428.545	293.179		117	51.436	135.366		117	0.760986	0.640104
118	1268.15	1232.26	392.295	278.675		118	35.89	113.62		118	0.703836	0.561074
119	1276.62	1240.98	336.103	260.943		119	35.634	75.16		119	0.702895	0.4213
120	1185.23	1228.62	328.007	268.938		120	-43.385	59.069		120	0.412408	0.362822
121	1146.53	1186.48	324.454	266.024		121	-39.95	58.43		121	0.425035	0.360499
122	1215.31	1267.59	324.007	278.123		122	-52.279	45.884		122	0.379712	0.314904
123	1194.79	1265.02	317.891	277.684		123	-70.236	40.207		123	0.313699	0.294272
124	1197.61	1283.28	308.441	293.077		124	-85.679	15.364		124	0.256928	0.203987
125	1118.86	1195.46	268.75	271.12		125	-76.6	-2.37		125	0.290304	0.139537
126	1119.86	1211.44	275.5	287.731		126	-91.587	-12.231		126	0.235209	0.1037
127	1087.01	1197.86	303.688	311.345		127	-110.841	-7.657		127	0.164428	0.120323
128	1045.83	1201.4	289.462	325.484		128	-155.569	-36.022		128	0	0.0172372
129	1042.55	1181.13	282.689	319.679		129	-138.585	-36.99		129	0.0624361	0.0137193
130	1062.2	1188.54	293.125	333.89		130	-126.339	-40.765		130	0.107455	0

## Sheet: exp1-endosome3
endosome 3							dMFI				%dMFI
frame #	Rab5(rim)	Rab5(background)	FYVE(rim)	FYVE(background)		frame #	Rab5	FYVE		frame #	Rab5	FYVE
31	1565.18	1656.97	333.589	338.875		31	-91.781	-5.286		31	0.0471555	0
32	1566.56	1626.16	329.677	320.841		32	-59.603	8.836		32	0.164608	0.0538749
33	1602.36	1683.8	356.855	338.085		33	-81.438	18.77		33	0.0849083	0.0917727
34	1653.69	1680.05	435.565	385.426		34	-26.357	50.139		34	0.285959	0.211444
35	1921.14	1755.03	611.227	398.467		35	166.109	212.76		35	0.988477	0.831837
36	1932.86	1763.6	683.091	451.337		36	169.266	231.754		36	1	0.904298
37	1926.59	1764.65	697.682	440.842		37	161.944	256.84		37	0.973274	1
38	1876.69	1736.66	683.848	431.81		38	140.031	252.038		38	0.89329	0.981681
39	1914.87	1760.67	630.917	406.957		39	154.201	223.96		39	0.945011	0.874564
40	1889.95	1736.7	667.742	418.17		40	153.25	249.572		40	0.94154	0.972273
41	1784.67	1680.62	642.038	411.441		41	104.05	230.597		41	0.761956	0.899884
42	1776.59	1697.98	633.667	418.12		42	78.607	215.547		42	0.669087	0.842469
43	1755.99	1722.37	550.945	417.956		43	33.62	132.989		43	0.50488	0.527513
44	1670.96	1768.43	481.952	419.744		44	-97.472	62.208		44	0.0263828	0.257487
45	1619.43	1710.38	436.515	403.038		45	-90.948	33.477		45	0.050196	0.147879
46	1580.52	1685.22	433.903	411.756		46	-104.7	22.147		46	0	0.104656
47	1538.49	1636.45	390.855	380.034		47	-97.957	10.821		47	0.0246125	0.0614475
48	1499.77	1582.9	375.169	365.426		48	-83.124	9.743		48	0.0787543	0.057335
49	1479.52	1571.79	381.355	380.097		49	-92.274	1.258		49	0.045356	0.0249651
50	1482.65	1575.76	384.422	388.913		50	-93.107	-4.491		50	0.0423155	0.00303289

## Sheet: exp1-endosome4
endosome 4							dMFI				%dMFI
frame #	Rab5(rim)	Rab5(background)	FYVE(rim)	FYVE(background)		frame #	Rab5	FYVE		frame #	Rab5	FYVE
30	1448.73	1596.55	314.243	336.68		30	-147.821	-22.437		30	0.0254841	0.0237057
31	1437.3	1592.37	305.046	321.593		31	-155.077	-16.547		31	0	0.0638861
32	1394.38	1525.16	299.5	325.412		32	-130.787	-25.912		32	0.0853098	0
33	1429.09	1488.92	305.651	330.357		33	-59.833	-24.706		33	0.33451	0.00822708
34	1440.4	1500.03	337.378	357.339		34	-59.626	-19.961		34	0.335237	0.0405965
35	1434.6	1459.06	367.927	365.714		35	-24.451	2.213		35	0.458776	0.191863
36	1531.87	1472.39	403.652	343.391		36	59.481	60.261		36	0.753557	0.587854
37	1585.93	1456.28	447.707	345.159		37	129.65	102.548		37	1	0.876328
38	1593.17	1467.42	434.781	327.347		38	125.748	107.434		38	0.986296	0.909659
39	1522.92	1427.1	442.295	321.618		39	95.819	120.677		39	0.881181	1
40	1540.86	1460.23	401.641	323.34		40	80.628	78.301		40	0.827828	0.71092
41	1442.78	1403.93	350.026	300.495		41	38.853	49.531		41	0.681109	0.514657
42	1336.26	1384.39	265.442	265.137		42	-48.136	0.305		42	0.375591	0.178847
43	1328.35	1382.7	259.25	271.476		43	-54.352	-12.226		43	0.35376	0.0933631
44	1325	1397.54	281.196	288.705		44	-72.535	-7.509		44	0.289899	0.125541
45	1288.4	1364.29	295.473	286.55		45	-75.886	8.923		45	0.27813	0.237637
46	1283.78	1360.91	297.872	289.9		46	-77.133	7.972		46	0.27375	0.23115
47	1257.19	1333.89	296.291	285.18		47	-76.701	11.111		47	0.275267	0.252563
48	1260.01	1323.58	289.676	284.86		48	-63.566	4.816		48	0.321399	0.20962
49	1226.42	1298.53	279.709	277.06		49	-72.106	2.649		49	0.291405	0.194837

## Sheet: exp1-endosome5
endosome 5							dMFI				%dMFI
frame #	Rab5(rim)	Rab5(background)	FYVE(rim)	FYVE(background)		frame #	Rab5	FYVE		frame #	Rab5	FYVE
40	1745.73	1849.65	339.292	348.243		40	-103.922	-8.951		40	0.0917947	0
41	1648.85	1748.76	337.01	343.875		41	-99.909	-6.865		41	0.104887	0.0113162
42	1682.06	1778.82	366.281	351.842		42	-96.754	14.439		42	0.115181	0.126887
43	1636.89	1768.94	407.341	383.271		43	-132.058	24.07		43	0	0.179134
44	1691.84	1801.48	405.635	378.138		44	-109.636	27.497		44	0.0731526	0.197725
45	1681.51	1750.8	399.115	359.105		45	-69.293	40.01		45	0.204773	0.265606
46	1747.84	1760.99	420.26	376.704		46	-13.149	43.556		46	0.387945	0.284842
47	1815.69	1778.07	495.25	436.25		47	37.622	59		47	0.553587	0.368624
48	1883.36	1708.9	584.01	472.936		48	174.452	111.074		48	1	0.651117
49	1843.44	1706.9	571.837	470.91		49	136.545	100.927		49	0.876327	0.596071
50	1793.82	1671.91	642.454	480.219		50	121.903	162.235		50	0.828557	0.928658
51	1804.81	1698.48	640.25	493.194		51	106.325	147.056		51	0.777733	0.846314
52	1789.03	1681.2	646.731	495.381		52	107.828	151.35		52	0.782637	0.869608
53	1812.09	1696.22	653.259	530.206		53	115.874	123.053		53	0.808887	0.716101
54	1805.09	1675.38	600.454	471.95		54	129.712	128.504		54	0.854034	0.745672
55	1728.17	1648.53	600.917	511.947		55	79.641	88.97		55	0.690676	0.531206
56	1777	1697.24	713.458	538.072		56	79.763	175.386		56	0.691074	1
57	1841.04	1810.4	702.49	549.98		57	30.641	152.51		57	0.530811	0.875901
58	1785.39	1782.9	595.779	508.603		58	2.49	87.176		58	0.438968	0.521474
59	1723.48	1748.29	578.511	541.547		59	-24.813	36.964		59	0.349891	0.249082
60	1710.29	1705.04	550.531	481.822		60	5.253	68.709		60	0.447982	0.421294
61	1717.44	1750.25	498.952	473.838		61	-32.81	25.114		61	0.3238	0.184797
62	1618.2	1657.22	499.385	480.362		62	-39.026	19.023		62	0.30352	0.151755
63	1582.28	1615.96	466.146	461.493		63	-33.68	4.653		63	0.320962	0.0737996
64	1604.08	1630.7	437.948	440.52		64	-26.621	-2.572		64	0.343992	0.0346051

## Sheet: exp1-endosome6
endosome 6							dMFI				%dMFI
frame #	Rab5(rim)	Rab5(background)	FYVE(rim)	FYVE(background)		frame #	Rab5	FYVE		frame #	Rab5	FYVE
53	1686.7	1657.36	391.03	360.974		53	29.338	30.056		53	0.195882	0.0737132
54	1743.3	1651	452.864	414.444		54	92.295	38.42		54	0.554166	0.109492
55	1707.56	1634.67	501.92	420.146		55	72.89	81.774		55	0.443734	0.294947
56	1828.55	1670.19	489.583	332.691		56	158.361	156.892		56	0.930144	0.616278
57	1868.82	1698.18	525.32	357.895		57	170.636	167.425		57	1	0.661335
58	1856.29	1692.75	603.49	364.303		58	163.54	239.187		58	0.959617	0.968311
59	1681.14	1571.8	453.935	344.75		59	109.344	109.185		59	0.651191	0.412203
60	1700.37	1561.68	529.68	338.875		60	138.692	190.805		60	0.818209	0.761348
61	1742.22	1597.68	607.62	363.862		61	144.536	243.758		61	0.851467	0.987864
62	1659.71	1559.8	619.24	372.645		62	99.905	246.595		62	0.597474	1
63	1631.38	1571.19	571.51	372.776		63	60.184	198.734		63	0.371425	0.795265
64	1620.9	1510.44	567.323	351.447		64	110.455	215.876		64	0.657514	0.868594
65	1539	1506.55	447.531	337.921		65	32.447	109.61		65	0.213575	0.414021
66	1479.83	1483.7	377.952	319.61		66	-3.866	58.342		66	0.00692018	0.194712
67	1495.29	1500.37	330.714	317.89		67	-5.082	12.824		67	0	0
68	1501.43	1498.92	338.75	325.206		68	2.51	13.544		68	0.0432056	0.00307994

## Sheet: exp1-endosome7
endosome 7							dMFI				%dMFI
frame #	Rab5(rim)	Rab5(background)	FYVE(rim)	FYVE(background)		frame #	Rab5	FYVE		frame #	Rab5	FYVE
108	632.847	685.114	452.089	476.438		108	-52.267	-24.349		108	0.123712	0.0839322
109	646.702	705.665	473.71	517.506		109	-58.963	-43.796		109	0.0955634	0.0531069
110	618.983	671.074	467.108	539.42		110	-52.091	-72.312		110	0.124451	0.00790644
111	610.908	664.722	460.683	537.983		111	-53.814	-77.3		111	0.117208	0
112	627.242	708.938	455.96	516.903		112	-81.696	-60.943		112	0	0.0259274
113	611.621	660.636	459.363	508.71		113	-49.015	-49.347		113	0.137382	0.0443081
114	614.919	646.597	433.387	459.938		114	-31.678	-26.551		114	0.210262	0.0804419
115	631.613	648.739	504.815	505.818		115	-17.126	-1.003		115	0.271435	0.120938
116	688.524	651.466	714.121	591		116	37.058	123.121		116	0.49921	0.317686
117	722.968	654.443	1004.77	646.591		117	68.525	358.175		117	0.631488	0.690268
118	812.227	680.701	1214.83	661.255		118	131.526	553.578		118	0.896328	1
119	816.992	660.804	1129.76	624.734		119	156.188	505.024		119	1	0.923037
120	780.114	656.658	1011.51	575.777		120	123.456	435.738		120	0.862404	0.813213
121	769.341	662.103	1017.61	570.63		121	107.238	446.984		121	0.794227	0.831039
122	756.312	648.15	994.844	533.272		122	108.162	461.572		122	0.798112	0.854162
123	784.282	692.04	1044.82	596.818		123	92.242	447.997		123	0.731188	0.832644
124	756.46	704.352	745.919	489.619		124	52.108	256.3		124	0.562476	0.528787
125	694.71	648.761	546.629	407.261		125	45.949	139.368		125	0.536585	0.343439
126	630.758	639.688	486.717	403.79		126	-8.93	82.927		126	0.305889	0.253975
127	597.009	623.048	458.098	407.476		127	-26.039	50.622		127	0.233967	0.202768
128	604.973	656.696	416.205	427.673		128	-51.723	-11.468		128	0.125998	0.10435
129	597.5	662.161	439.098	512.304		129	-64.661	-73.206		129	0.0716105	0.00648937

## Sheet: exp1-endosome8
endosome 8							dMFI				%dMFI
frame #	Rab5(rim)	Rab5(background)	FYVE(rim)	FYVE(background)		frame #	Rab5	FYVE		frame #	Rab5	FYVE
106	724.653	789.085	592.992	757.17		106	-64.432	-164.178		106	0	0
107	728.5	778.517	590.484	692.375		107	-50.017	-101.891		107	0.0644522	0.0798854
108	714.218	764.756	619.194	734.153		108	-50.538	-114.959		108	0.0621227	0.0631252
109	687.065	720.261	563.5	626.665		109	-33.196	-63.165		109	0.139662	0.129553
110	671.25	705.79	541.371	620.148		110	-34.54	-78.777		110	0.133653	0.10953
111	640.387	670.722	496.371	544.273		111	-30.335	-47.902		111	0.152454	0.149128
112	652.403	669.864	559.863	508.869		112	-17.461	50.994		112	0.210016	0.275966
113	655.347	659.778	630.282	505.619		113	-4.431	124.663		113	0.268276	0.37045
114	656.306	632.409	731.839	520.239		114	23.897	211.6		114	0.394936	0.48195
115	778.424	656.902	949.402	535.098		115	121.522	414.304		115	0.831436	0.741925
116	777.174	646.967	1112.17	518.223		116	130.207	593.944		116	0.870268	0.97232
117	762.453	634.267	1156.82	541.294		117	128.186	615.526		117	0.861232	1
118	784.602	648.089	1057.63	524.172		118	136.513	533.461		118	0.898464	0.894749
119	771.621	642.92	1024.52	544.432		119	128.701	480.092		119	0.863535	0.826301
120	814.172	654.95	906.836	509.65		120	159.222	397.186		120	1	0.719971
121	740.352	642.35	840.969	490.494		121	98.002	350.475		121	0.726274	0.660062
122	703.274	648.574	725.073	470.159		122	54.7	254.914		122	0.532662	0.537501
123	729.968	697.432	649.637	513.58		123	32.536	136.057		123	0.433563	0.385063
124	714.411	727.244	613.927	573.023		124	-12.833	40.904		124	0.230709	0.263025
125	652.435	672.114	566.944	548.483		125	-19.679	18.461		125	0.200099	0.234241
126	637.661	685.301	482.895	528.506		126	-47.64	-45.611		126	0.0750803	0.152067
127	613.276	646.116	519.026	573.058		127	-32.84	-54.032		127	0.141254	0.141266
128	601.708	644.938	462.725	536.438		128	-43.23	-73.713		128	0.0947982	0.116025
129	605.121	645.692	487.397	548.942		129	-40.571	-61.545		129	0.106687	0.131631
130	612.31	667.302	453.509	563.465		130	-54.992	-109.956		130	0.0422081	0.0695418

## Sheet: exp1-endosome9
endosome 9							dMFI				%dMFI
frame #	Rab5(rim)	Rab5(background)	FYVE(rim)	FYVE(background)		frame #	Rab5	FYVE		frame #	Rab5	FYVE
93	596.352	608.018	372.417	400.616		93	-11.666	-28.199		93	0.095196	0.00810972
94	575.192	598.045	347.712	363.59		94	-22.853	-15.878		94	0.0506334	0.0222627
95	580.815	605.585	351.815	379.122		95	-24.77	-27.307		95	0.0429971	0.00913435
96	590.454	626.018	375.88	410.994		96	-35.564	-35.114		96	0	0.000166559
97	609.155	617.349	383.293	418.552		97	-8.194	-35.259		97	0.109026	0
98	618.233	633.965	423.983	429.337		98	-15.732	-5.354		98	0.0789994	0.0343515
99	646.845	649.465	552.052	475.831		99	-2.62	76.221		99	0.13123	0.128056
100	812.655	671.087	1123.45	568.924		100	141.568	554.524		100	0.705593	0.677475
101	819.142	663.33	1260.08	560.358		101	155.812	699.725		101	0.762333	0.844266
102	820.276	652.453	1254.78	549.378		102	167.823	705.406		102	0.810178	0.850791
103	825.931	666.965	1127.36	515.029		103	158.966	612.333		103	0.774896	0.74388
104	895.466	684.82	1047.56	495.198		104	210.646	552.362		104	0.98076	0.674992
105	865.861	665.957	1258.8	621.872		105	199.904	636.924		105	0.93797	0.772127
106	907.769	692.293	1284.18	616.378		106	215.476	667.807		106	1	0.807602
107	841.241	658.409	1275	592.311		107	182.832	682.689		107	0.869965	0.824697
108	830.574	655.884	1023.99	528.793		108	174.69	495.198		108	0.837532	0.609328
109	807.01	656.09	1282.42	574.231		109	150.92	708.192		109	0.742846	0.853992
110	789.24	649.526	1112.53	559.756		110	139.714	552.773		110	0.698207	0.675464
111	792.337	643.038	1489.87	665.365		111	149.299	824.5		111	0.736389	0.987593
112	776.365	645	1473.88	672.301		112	131.365	801.574		112	0.66495	0.961258
113	708.796	586.811	1128.13	503.476		113	121.985	624.654		113	0.627585	0.758033
114	697.269	589.939	1304.7	533.902		114	107.33	770.802		114	0.569208	0.925911
115	709.398	597.732	1361.42	526.116		115	111.666	835.301		115	0.58648	1
116	700.62	596.549	1345.57	517.665		116	104.071	827.9		116	0.556226	0.991499
117	709.13	605.438	1283.79	514.406		117	103.692	769.381		117	0.554716	0.924279
118	686.5	590.119	1234.54	512.4		118	96.381	722.137		118	0.525594	0.87001
119	680.25	574.256	987.685	466.329		119	105.994	521.356		119	0.563886	0.639376
120	719.99	606.154	1016.16	504.122		120	113.836	512.041		120	0.595124	0.628676
121	720.01	626.532	1087.96	492.731		121	93.478	595.231		121	0.51403	0.724235
122	691.192	591.006	959.663	472.66		122	100.186	487.003		122	0.54075	0.599915
123	734.731	639.731	925.288	486.603		123	95	438.685		123	0.520092	0.544413
124	738.538	622.071	798.49	452.365		124	116.467	346.125		124	0.605605	0.43809
125	640.833	617.829	668.708	425.112		125	23.004	243.596		125	0.233301	0.320317
126	638.906	609.112	576.771	441.842		126	29.794	134.929		126	0.260349	0.195493
127	597.156	613.099	591.76	441.743		127	-15.943	150.017		127	0.0781589	0.212824
128	590.375	604.421	590.938	431.414		128	-14.046	159.524		128	0.0857154	0.223744
129	577.568	599.014	613.114	434.833		129	-21.446	178.281		129	0.056238	0.24529
130	589.705	579.743	578.659	434.507		130	9.962	144.152		130	0.18135	0.206087
131	568.226	598.728	546.726	491.993		131	-30.502	54.733		131	0.0201641	0.103373

## Sheet: exp1-endosome10
endosome 10							dMFI				%dMFI
frame #	Rab5(rim)	Rab5(background)	FYVE(rim)	FYVE(background)		frame #	Rab5	FYVE		frame #	Rab5	FYVE
106	1392.7	1481.95	302.419	341.79		106	-89.253	-39.371		106	0.243789	0.00506614
107	1350.93	1432.05	347.962	325.94		107	-81.117	22.022		107	0.273698	0.228184
108	1396.32	1425.31	393.463	359.24		108	-28.996	34.223		108	0.465304	0.272525
109	1404.38	1415.4	483.069	385.52		109	-11.03	97.549		109	0.53135	0.502668
110	1494.27	1400.11	377.039	291.059		110	94.157	85.98		110	0.918036	0.460623
111	1405.9	1354.03	553.901	338.887		111	51.872	215.014		111	0.762589	0.929565
112	1406.55	1354.78	584.434	350.039		112	51.767	234.395		112	0.762203	1
113	1475.62	1359.17	527.684	330.02		113	116.453	197.664		113	1	0.86651
114	1327.78	1285.29	487.375	313.601		114	42.495	173.774		114	0.728118	0.779688
115	1334.43	1307.96	465.283	313		115	26.471	152.283		115	0.669211	0.701585
116	1346.31	1277.24	456.994	290.349		116	69.063	166.645		116	0.825786	0.75378
117	1319.45	1268.02	428.545	293.179		117	51.436	135.366		117	0.760986	0.640104
118	1268.15	1232.26	392.295	278.675		118	35.89	113.62		118	0.703836	0.561074
119	1276.62	1240.98	336.103	260.943		119	35.634	75.16		119	0.702895	0.4213
120	1185.23	1228.62	328.007	268.938		120	-43.385	59.069		120	0.412408	0.362822
121	1146.53	1186.48	324.454	266.024		121	-39.95	58.43		121	0.425035	0.360499
122	1215.31	1267.59	324.007	278.123		122	-52.279	45.884		122	0.379712	0.314904
123	1194.79	1265.02	317.891	277.684		123	-70.236	40.207		123	0.313699	0.294272
124	1197.61	1283.28	308.441	293.077		124	-85.679	15.364		124	0.256928	0.203987
125	1118.86	1195.46	268.75	271.12		125	-76.6	-2.37		125	0.290304	0.139537
126	1119.86	1211.44	275.5	287.731		126	-91.587	-12.231		126	0.235209	0.1037
127	1087.01	1197.86	303.688	311.345		127	-110.841	-7.657		127	0.164428	0.120323
128	1045.83	1201.4	289.462	325.484		128	-155.569	-36.022		128	0	0.0172372
129	1042.55	1181.13	282.689	319.679		129	-138.585	-36.99		129	0.0624361	0.0137193
130	1062.2	1188.54	293.125	333.89		130	-126.339	-40.765		130	0.107455	0
										0	0.571899	0.14815
										0	0.571899	0.14815
										0	0.571899	0.14815
										0	0.571899	0.14815
										0	0.571899	0.14815
										0	0.571899	0.14815
										0	0.571899	0.14815
										0	0.571899	0.14815
										0	0.571899	0.14815
										0	0.571899	0.14815
										0	0.571899	0.14815
										0	0.571899	0.14815
										0	0.571899	0.14815
										0	0.571899	0.14815

[truncated: 46 more sheets: exp1-endosome11, exp1-endosome12, exp1-endosome13, exp1-endosome, exp1-endosome15, exp1-endosome16, exp1-endosome17, exp1-endosome18, exp1-endosome19, exp1-time, exp1-aligned, exp2-endosome1, exp2-endosome2, exp2-endosome3, exp2-endosome4, exp2-endosome5, exp2-endosome6, exp2-endosome7, exp2-endosome8, exp2-endosome9 …]
