# Supplementary material for: A novel live-cell imaging assay reveals regulation of endosome maturation
Source: eLife. 2021 Nov 30;10:e70982. doi: 10.7554/eLife.70982 (PMC8635980; doi:10.7554/eLife.70982)
Supplement: Figure 6—figure supplement 1—source data 1. [file elife-70982-fig6-figsupp1-data1.xlsx]

## Sheet: v1
frame #	83				84				85				86				87				88				89				90				91				92				93				94				95
			Rab5	Snx1			Rab5	Snx1			Rab5	Snx1			Rab5	Snx1			Rab5	Snx1			Rab5	Snx1			Rab5	Snx1			Rab5	Snx1			Rab5	Snx1			Rab5	Snx1			Rab5	Snx1			Rab5	Snx1
		0	418.354	304.433		0	393.667	311.284		0	439.712	305.005		0	393.545	299.071		0	401.304	301.359		0	379.056	289.611		0	498.789	324.319		0	481.72	384.476		0	460.858	322.277		0	439.94	455.713		0	500.688	315.962		0	429.955	314.636
		0.10913	412.717	314.548		0.10913	393.944	304.916		0.10913	431.172	297.742		0.10913	398.531	292.708		0.10913	382.13	301.049		0.10913	378.127	285.242		0.10913	502.726	327.613		0.10913	471.372	359.989		0.10913	462.708	317.365		0.10913	442.205	402.676		0.10913	478.165	313.797		0.10913	434.391	292.688
		0.21825	396.57	304.985		0.21825	404.124	306.81		0.21825	423.064	302.195		0.21825	396.792	304.176		0.21825	376.675	303.079		0.21825	379.494	284.921		0.21825	510.748	316.432		0.21825	463.644	346.174		0.21825	459.905	316.415		0.21825	441.211	362.395		0.21825	459.78	307.326		0.21825	420.714	299.966
		0.32738	400.768	297.736		0.32738	397.138	305.79		0.32738	403.087	307.533		0.32738	401.132	311.494		0.32738	387.107	304.126		0.32738	388.088	282.079		0.32738	498.836	321.957		0.32738	457.316	328.827		0.32738	456.957	310.23		0.32738	439.342	343.36		0.32738	441.116	307.174		0.32738	406.41	297.076
		0.43651	395.819	303.32		0.43651	397.524	310.282		0.43651	416.75	296.36		0.43651	426.48	296.067		0.43651	387.731	314.623		0.43651	388.114	282.28		0.43651	514.651	322.84		0.43651	458.995	334.316		0.43651	451.171	320.873		0.43651	445.763	328.506		0.43651	438.018	305.787		0.43651	407.564	294.199
		0.54563	405.944	311.302		0.54563	400.803	310.2		0.54563	415.586	299.531		0.54563	413.296	309.824		0.54563	381.82	306.412		0.54563	396.219	285.855		0.54563	506.621	324.845		0.54563	463.879	338.778		0.54563	444.622	334.484		0.54563	451.958	312.76		0.54563	431.668	303.146		0.54563	402.781	291.267
		0.65476	416.54	317.14		0.65476	387.889	322.691		0.65476	407.945	294.8		0.65476	411.698	318.721		0.65476	389.379	304.944		0.65476	396.054	293.833		0.65476	514.09	330.286		0.65476	480.432	333.69		0.65476	439.065	347.019		0.65476	440.324	315.901		0.65476	436.476	303.334		0.65476	407.187	294.21
		0.76389	440.475	314.883		0.76389	394.771	310.966		0.76389	417.508	304.541		0.76389	413.853	328.155		0.76389	405.517	305.461		0.76389	388.938	295.171		0.76389	509.888	329.9		0.76389	494.318	334.405		0.76389	444.275	373.358		0.76389	449.293	310.252		0.76389	453.249	304.864		0.76389	424.152	304.436
		0.87302	478.166	326.568		0.87302	394.695	323.411		0.87302	445.234	299.413		0.87302	421.811	322.893		0.87302	420.351	305.859		0.87302	385.078	292.443		0.87302	517.382	333.841		0.87302	495.286	333.111		0.87302	458.403	422.865		0.87302	462.308	318.376		0.87302	451.405	304.576		0.87302	417.52	304.144
		0.98214	547.685	345.623		0.98214	415.056	329.386		0.98214	465.931	306.638		0.98214	427.443	334.981		0.98214	418.896	324.758		0.98214	402.795	293.401		0.98214	520.829	341.423		0.98214	500.193	334.145		0.98214	461.007	486.286		0.98214	483.229	321.523		0.98214	452.806	305.034		0.98214	417.247	309.344
		1.09127	596.131	350.545		1.09127	442.112	323.764		1.09127	501.051	316.051		1.09127	420.113	331.068		1.09127	445.796	332.961		1.09127	414.589	295.748		1.09127	539.837	362.79		1.09127	500.895	341.187		1.09127	462.335	577.04		1.09127	507.745	315.373		1.09127	452.092	304.156		1.09127	421.576	298.2
		1.2004	582.23	366.727		1.2004	469.332	340.235		1.2004	527.176	315.261		1.2004	425.692	336.107		1.2004	460.654	340.742		1.2004	427.464	302.092		1.2004	562.348	387.738		1.2004	489.008	357.403		1.2004	478.384	658.339		1.2004	526.696	320.581		1.2004	477.428	305.21		1.2004	426.469	314.99
		1.30952	555.337	391.177		1.30952	521.208	349.234		1.30952	535.462	320.88		1.30952	449.502	337.08		1.30952	472.572	346.955		1.30952	438.034	303.067		1.30952	595.165	419.673		1.30952	488.565	377.974		1.30952	483.839	686.974		1.30952	565.082	324.739		1.30952	493.051	309.678		1.30952	431.669	319.952
		1.41865	526.345	392.556		1.41865	570.683	355.673		1.41865	538.749	323.003		1.41865	468.61	348.49		1.41865	499.277	357.098		1.41865	435.537	312.183		1.41865	644.554	423.431		1.41865	492.304	398.093		1.41865	496.62	705.213		1.41865	561.644	333.562		1.41865	512.517	325.201		1.41865	449.293	329.391
		1.52778	494.373	368.149		1.52778	592.636	364.371		1.52778	565.238	332.253		1.52778	471.306	348.922		1.52778	511.465	369.08		1.52778	458.365	314.213		1.52778	691.815	417.232		1.52778	519.305	416.856		1.52778	504.577	666.074		1.52778	548.013	347.988		1.52778	513.454	332.729		1.52778	450.042	337.965
		1.6369	480.983	351.692		1.6369	582.417	366.476		1.6369	613.319	333.912		1.6369	499.509	348.671		1.6369	534.952	366.972		1.6369	487.624	316.043		1.6369	757.951	412.097		1.6369	540.648	415.712		1.6369	524.836	610.383		1.6369	547.517	348.494		1.6369	517.117	345.436		1.6369	468.05	347.724
		1.74603	481.739	353.404		1.74603	551.011	343.575		1.74603	637.189	348.208		1.74603	531.935	359.163		1.74603	542.158	363.939		1.74603	472.835	322.931		1.74603	794.625	406.532		1.74603	578.423	403.368		1.74603	537.249	540.371		1.74603	565.984	363.428		1.74603	508.97	365.401		1.74603	491.411	360.994
		1.85516	457.218	331.75		1.85516	518.055	329.63		1.85516	663.353	354.224		1.85516	565.595	378.571		1.85516	561.384	365.379		1.85516	483.747	334.062		1.85516	794.947	411.428		1.85516	583.42	391.444		1.85516	580.819	473.228		1.85516	534.835	377.047		1.85516	524.546	372.026		1.85516	513.737	379.181
		1.96429	472.486	341.422		1.96429	494.081	331.165		1.96429	640.48	366.396		1.96429	607.311	397.554		1.96429	544.873	379.98		1.96429	488.039	346.997		1.96429	748.104	401.556		1.96429	612.81	382.126		1.96429	609.678	420.665		1.96429	533.585	393.312		1.96429	544.768	364.496		1.96429	507.399	406.762
		2.07341	472.313	336.525		2.07341	483.075	336.894		2.07341	584.842	368.921		2.07341	664.106	409.962		2.07341	539.39	378.185		2.07341	510.233	330.997		2.07341	694.883	377.925		2.07341	621.245	379.701		2.07341	629.806	386.942		2.07341	537.958	393.372		2.07341	557.722	356.092		2.07341	504.504	461.623
		2.18254	476.55	320.749		2.18254	475.079	338.998		2.18254	545.315	369.724		2.18254	663.301	408.594		2.18254	513.56	371.689		2.18254	514.051	330.661		2.18254	666.174	374.851		2.18254	613.279	379.891		2.18254	639.751	370.26		2.18254	536.937	397.097		2.18254	558.298	359.851		2.18254	502.611	489.208
		2.29167	493.295	328.238		2.29167	455.549	321.069		2.29167	528.975	369.284		2.29167	645.681	399.644		2.29167	503.906	360.275		2.29167	508.051	331.62		2.29167	655.65	368.946		2.29167	580.166	363.693		2.29167	623.038	370.93		2.29167	527.643	413.372		2.29167	548.702	346.575		2.29167	497.009	513.967
		2.40079	486.657	329.353		2.40079	486.087	319.841		2.40079	528.636	355.149		2.40079	624.982	384.218		2.40079	498.773	342.312		2.40079	485.656	326.401		2.40079	632.665	366.656		2.40079	558.276	361.67		2.40079	592.967	375.147		2.40079	508.289	438.037		2.40079	554.752	346.567		2.40079	493.161	522.456
		2.50992	504.551	335.209		2.50992	473.199	324.048		2.50992	519.105	352.568		2.50992	601.01	373.958		2.50992	485.168	332.196		2.50992	464.628	333.201		2.50992	607.624	358.851		2.50992	565.502	375.755		2.50992	581.234	413.653		2.50992	517.906	501.484		2.50992	543.009	342.004		2.50992	494.087	512.793
		2.61905	491.291	334.498		2.61905	473.94	318.457		2.61905	514.366	354.127		2.61905	584.758	362.241		2.61905	476.842	326.445		2.61905	454.789	316.186		2.61905	602.121	368.928		2.61905	569.421	373.75		2.61905	558.067	475.913		2.61905	531.812	561.244		2.61905	541.76	363.827		2.61905	490.681	477.463
		2.72817	504.847	326.147		2.72817	480.387	326.962		2.72817	501.766	343.782		2.72817	575.651	355.401		2.72817	475.247	324.619		2.72817	455.944	309.111		2.72817	604.228	371.194		2.72817	572.183	375.365		2.72817	554.476	516.485		2.72817	531.502	574.197		2.72817	535.945	405.32		2.72817	482.614	426.227
		2.8373	507.272	322.046		2.8373	486.613	330.5		2.8373	513.358	352.622		2.8373	558.307	366.028		2.8373	470.652	327.924		2.8373	446.45	304.715		2.8373	591.012	376.13		2.8373	581.066	381.207		2.8373	537.685	524.693		2.8373	527.637	535.18		2.8373	540.717	449.497		2.8373	495.257	384.908
		2.94643	501.724	342.207		2.94643	491.062	332.98		2.94643	523.927	356.262		2.94643	557.199	348.511		2.94643	477.559	326.729		2.94643	458.14	322.136		2.94643	594.019	396.897		2.94643	604.486	403.205		2.94643	542.968	511.122		2.94643	525.362	470.493		2.94643	542.288	483.381		2.94643	480.523	361.055
		3.05556	526.408	346.623		3.05556	494.926	344.274		3.05556	529.4	355.794		3.05556	537.43	348.236		3.05556	479.724	312.668		3.05556	449.478	309.313		3.05556	587.294	415.436		3.05556	612.757	408.524		3.05556	557.495	467.224		3.05556	538.45	412.551		3.05556	544.238	472.44		3.05556	493.35	350.119
		3.16468	541.364	339.264		3.16468	473.453	340.58		3.16468	540.648	364.474		3.16468	524.71	349.231		3.16468	480.99	316.099		3.16468	441.87	314.532		3.16468	589.271	413.646		3.16468	590.639	446.329		3.16468	545.518	419.237		3.16468	549.134	370.391		3.16468	524.368	429.076		3.16468	489.042	343.419
		3.27381	553.858	343.543		3.27381	493.717	340.349		3.27381	545.396	357.103		3.27381	513.971	342.038		3.27381	473.22	309.306		3.27381	447.521	301.093		3.27381	589.163	410.789		3.27381	583.122	486.371		3.27381	531.307	391.036		3.27381	544.385	354.086		3.27381	518.78	391.591		3.27381	491.8	342.712
		3.38294	561.908	355.245		3.38294	467.533	335.728		3.38294	544.074	362.097		3.38294	498.325	332.753		3.38294	471.975	309.755		3.38294	448.195	313.444		3.38294	590.591	386.157		3.38294	571.789	542.483		3.38294	525.001	362.572		3.38294	548.004	354.375		3.38294	511.725	367.808		3.38294	486.825	336.618
		3.49206	542.383	360.159		3.49206	484.416	336.697		3.49206	541.425	357.884		3.49206	489.258	334.054		3.49206	464.606	312.744		3.49206	442.909	305.855		3.49206	620.982	393.992		3.49206	560.003	573.532		3.49206	544.133	362.811		3.49206	554.666	347.731		3.49206	515.729	361.986		3.49206	497.037	334.541
		3.60119	540.346	353.423		3.60119	475.762	339.877		3.60119	534.094	350.564		3.60119	481.555	333.873		3.60119	463.06	307.665		3.60119	426.908	304.699		3.60119	631.105	399.049		3.60119	562.281	591.033		3.60119	526.401	366.244		3.60119	549.994	345.004		3.60119	520.766	395.516		3.60119	519.604	330.879
		3.71032	539.212	359.37		3.71032	479.594	339.222		3.71032	520.684	343.391		3.71032	479.605	323.921		3.71032	461.096	301.048		3.71032	434.548	311.632		3.71032	642.566	389.958		3.71032	572.645	595.336		3.71032	542.82	359.855		3.71032	550.005	339.655		3.71032	514.343	421.483		3.71032	518.254	338.391
		3.81944	517.726	358.283		3.81944	456.954	334.753		3.81944	513.421	349.042		3.81944	462.494	322.937		3.81944	460.328	308.57		3.81944	431.478	314.526		3.81944	657.776	405.824		3.81944	557.035	611.775		3.81944	551.177	365.255		3.81944	554.898	340.774		3.81944	523.931	463.709		3.81944	513.548	326.224
		3.92857	488.828	357.957		3.92857	446.648	339.669		3.92857	488.26	339.135		3.92857	438.129	327.319		3.92857	439.836	306.004		3.92857	437.511	295.296		3.92857	663.778	436.935		3.92857	553.055	602.131		3.92857	553.485	361.485		3.92857	583.549	349.938		3.92857	530.341	503.21		3.92857	522.569	323.026
		4.0377	478.602	342.204		4.0377	432.67	329.952		4.0377	459.484	347.147		4.0377	432.239	319.829		4.0377	444.822	299.566		4.0377	429.58	304.151		4.0377	651.371	455.487		4.0377	562.618	609.343		4.0377	563.39	358.131		4.0377	603.548	343.43		4.0377	543.483	541.632		4.0377	526.994	329.177
		4.14683	439.178	346.468		4.14683	417.827	321.337		4.14683	445.25	336.285		4.14683	431.373	313.105		4.14683	421.774	297.883		4.14683	427.209	310.952		4.14683	630.214	493.885		4.14683	577.504	624.539		4.14683	569.237	356.84		4.14683	600.044	347.709		4.14683	557.423	551.588		4.14683	537.24	319.378
		4.25595	442.642	334.318		4.25595	407.126	323.663		4.25595	459.482	338.228		4.25595	420.682	309.728		4.25595	408.913	297.717		4.25595	421.956	310.267		4.25595	614.991	497.626		4.25595	583.127	651.429		4.25595	575.461	354.775		4.25595	590.702	352.146		4.25595	588.064	533.812		4.25595	548.617	313.797
		4.36508	434.626	326.104		4.36508	407.566	319.113		4.36508	439.059	326.956		4.36508	408.283	306.17		4.36508	401.929	308.398		4.36508	417.243	310.399		4.36508	581.651	470.212		4.36508	585.841	636.629		4.36508	577.657	345.9		4.36508	567.364	357.697		4.36508	611.112	489.021		4.36508	549.067	322.018
		4.47421	420.49	316.213		4.47421	397.115	314.959		4.47421	440.423	318.723		4.47421	397.301	308.412		4.47421	412.803	303.094		4.47421	409.222	306.692		4.47421	558.947	447.242		4.47421	564.909	601.982		4.47421	583.525	332.717		4.47421	543.252	358.67		4.47421	624.553	458.609		4.47421	563.236	329.343
		4.58333	398.379	311.452						4.58333	438.698	313.003		4.58333	397.035	315.001		4.58333	391.15	300.975		4.58333	390.433	313.588		4.58333	528.474	423.245		4.58333	555.224	593.302		4.58333	553.948	347.185		4.58333	528.481	361.463		4.58333	642.228	400.975		4.58333	566.969	336.003
		4.69246	420.359	303.687						4.69246	441.155	308.349		4.69246	387.262	303.286		4.69246	409.596	304.92		4.69246	393.117	304.169		4.69246	526.017	402.686		4.69246	546.873	569.048		4.69246	532.165	337.438		4.69246	497.166	378.072		4.69246	662.037	365.928		4.69246	555.697	340.472
																						4.80159	391.821	295.268		4.80159	529.556	378.039		4.80159	521.841	546.02		4.80159	490.633	331.3		4.80159	480.511	416.07		4.80159	664.044	350.833		4.80159	509.034	351.171
																						4.91071	399.474	295.422		4.91071	520.123	354.329		4.91071	498.309	490.326		4.91071	481.549	319.456		4.91071	462.318	454.821		4.91071	626.445	323.017		4.91071	476.592	352.922
																						5.01984	377.614	292.445		5.01984	510.687	344.167		5.01984	484.147	432.891		5.01984	468.744	318.438		5.01984	452.708	480.673		5.01984	583.524	332.091		5.01984	443.253	347.533
																										5.12897	499.807	323.672		5.12897	486.882	395.681		5.12897	458.649	325.168		5.12897	439.219	471.765		5.12897	510.515	318.8		5.12897	449.93	335.605
																																														5.2381	426.919	326.666
	single minmax for Rab5, individual minmax for Snx1
	min		294.192	297.736			294.192	304.916			294.192	294.8			294.192	292.708			294.192	297.717			294.192	282.079			294.192	316.432			294.192	328.827			294.192	310.23			294.192	310.252			294.192	303.146			294.192	291.267
	max		794.947	392.556			794.947	366.476			794.947	369.724			794.947	409.962			794.947	379.98			794.947	346.997			794.947	497.626			794.947	651.429			794.947	705.213			794.947	574.197			794.947	551.588			794.947	522.456
	overall min		294.192	274.272
	overall max		794.947	705.213
	overall min		294.192	274.272			294.192	274.272			294.192	274.272			294.192	274.272			294.192	274.272			294.192	274.272			294.192	274.272			294.192	274.272			294.192	274.272			294.192	274.272			294.192	274.272			294.192	274.272
	overall max		794.947	705.213			794.947	705.213			794.947	705.213			794.947	705.213			794.947	705.213			794.947	705.213			794.947	705.213			794.947	705.213			794.947	705.213			794.947	705.213			794.947	705.213			794.947	705.213
	Rab5 normalised for overall min-max, Snx1 normalised for individual min-max
frame #	83				84				85				86				87				88				89				90				91				92				93				94				95
			Rab5	Snx1			Rab5	Snx1			Rab5	Snx1			Rab5	Snx1			Rab5	Snx1			Rab5	Snx1			Rab5	Snx1			Rab5	Snx1			Rab5	Snx1			Rab5	Snx1			Rab5	Snx1			Rab5	Snx1
		0	0.247949	0.070627		0	0.19865	0.10346		0	0.290601	0.136208		0	0.198406	0.0542668		0	0.213901	0.044269		0	0.169472	0.116022		0	0.408577	0.0435279		0	0.37449	0.1725		0	0.332829	0.0305		0	0.291056	0.551103		0	0.412369	0.0515855		0	0.271116	0.101082
		0.10913	0.236692	0.177305		0.10913	0.199203	0		0.10913	0.273547	0.0392666		0.10913	0.208363	0		0.10913	0.175611	0.0405031		0.10913	0.167617	0.0487291		0.10913	0.416439	0.0617073		0.10913	0.353826	0.0965958		0.10913	0.336524	0.0180641		0.10913	0.29558	0.350164		0.10913	0.367391	0.0428712		0.10913	0.279975	0.00614649
		0.21825	0.204447	0.0764487		0.21825	0.219532	0.03077		0.21825	0.257355	0.0986991		0.21825	0.20489	0.0978048		0.21825	0.164717	0.0651703		0.21825	0.170347	0.0437813		0.21825	0.432459	0		0.21825	0.338393	0.0537721		0.21825	0.330926	0.0156589		0.21825	0.293595	0.197553		0.21825	0.330677	0.0168249		0.21825	0.252662	0.0376272
		0.32738	0.21283	0		0.32738	0.205581	0.014204		0.32738	0.217461	0.169945		0.32738	0.213557	0.160216		0.32738	0.18555	0.0779063		0.32738	0.187509	0		0.32738	0.408671	0.0304922		0.32738	0.325756	0		0.32738	0.325039	0		0.32738	0.289862	0.125435		0.32738	0.293405	0.016213		0.32738	0.224097	0.0251266
		0.43651	0.202947	0.0588826		0.43651	0.206352	0.08718		0.43651	0.244746	0.0208132		0.43651	0.264177	0.0286472		0.43651	0.186796	0.205502		0.43651	0.187561	0.00309467		0.43651	0.440253	0.0353654		0.43651	0.329109	0.0170148		0.43651	0.313485	0.0269455		0.43651	0.302685	0.0691583		0.43651	0.287218	0.0106302		0.43651	0.226402	0.0126823
		0.54563	0.223167	0.143068		0.54563	0.2129	0.0858366		0.54563	0.242422	0.0631349		0.54563	0.237849	0.145974		0.54563	0.174992	0.105692		0.54563	0.203746	0.0581733		0.54563	0.424217	0.0464309		0.54563	0.338862	0.0308461		0.54563	0.300406	0.0614052		0.54563	0.315056	0.00950198		0.54563	0.274537	0		0.54563	0.21685	0
		0.65476	0.244327	0.204633		0.65476	0.187111	0.288751		0.65476	0.227163	0		0.65476	0.234658	0.221852		0.65476	0.190087	0.0878513		0.65476	0.203417	0.181065		0.65476	0.439133	0.0764595		0.65476	0.371918	0.0150743		0.65476	0.289309	0.0931407		0.65476	0.291823	0.0214022		0.65476	0.284139	0.000756716		0.65476	0.225649	0.0127298
		0.76389	0.292125	0.180838		0.76389	0.200855	0.0982797		0.76389	0.24626	0.130012		0.76389	0.238961	0.30231		0.76389	0.222314	0.0941348		0.76389	0.189206	0.201674		0.76389	0.430741	0.0743292		0.76389	0.399648	0.0172907		0.76389	0.299713	0.159825		0.76389	0.309734	0		0.76389	0.317634	0.00691509		0.76389	0.259528	0.0569621
		0.87302	0.367393	0.304071		0.87302	0.200703	0.30044		0.87302	0.301628	0.0615693		0.87302	0.254853	0.257433		0.87302	0.251937	0.0989729		0.87302	0.181498	0.159658		0.87302	0.445707	0.0960793		0.87302	0.401581	0.0132795		0.87302	0.327927	0.285164		0.87302	0.335725	0.0307791		0.87302	0.313952	0.00575587		0.87302	0.246284	0.055699
		0.98214	0.506222	0.505032		0.98214	0.241363	0.3975		0.98214	0.34296	0.158002		0.98214	0.2661	0.360525		0.98214	0.249032	0.328714		0.98214	0.216878	0.1744		0.98214	0.45259	0.137924		0.98214	0.411381	0.0164847		0.98214	0.333127	0.445731		0.98214	0.377504	0.0427021		0.98214	0.31675	0.00759936		0.98214	0.245739	0.0781914
		1.09127	0.602967	0.556935		1.09127	0.295394	0.306184		1.09127	0.413094	0.283633		1.09127	0.251462	0.327153		1.09127	0.302751	0.428428		1.09127	0.240431	0.210568		1.09127	0.490549	0.255847		1.09127	0.412783	0.0383135		1.09127	0.335779	0.675497		1.09127	0.426462	0.0194018		1.09127	0.315324	0.00406534		1.09127	0.254384	0.0299885
		1.2004	0.575207	0.727596		1.2004	0.349752	0.573741		1.2004	0.465265	0.273084		1.2004	0.262603	0.370128		1.2004	0.332422	0.523012		1.2004	0.266142	0.308279		1.2004	0.535503	0.393534		1.2004	0.389044	0.0885797		1.2004	0.367828	0.881327		1.2004	0.464307	0.0391332		1.2004	0.365919	0.00830777		1.2004	0.264155	0.102613
		1.30952	0.521502	0.985462		1.30952	0.453347	0.71993		1.30952	0.481812	0.348086		1.30952	0.310152	0.378426		1.30952	0.356222	0.598536		1.30952	0.28725	0.3233		1.30952	0.601038	0.569782		1.30952	0.38816	0.152346		1.30952	0.378722	0.953823		1.30952	0.540963	0.0548864		1.30952	0.397118	0.0262919		1.30952	0.274539	0.124076
		1.41865	0.463606	1		1.41865	0.552148	0.824519		1.41865	0.488376	0.376426		1.41865	0.34831	0.475736		1.41865	0.409551	0.721844		1.41865	0.282264	0.46373		1.41865	0.699667	0.590522		1.41865	0.395626	0.21471		1.41865	0.404245	1		1.41865	0.534097	0.0883139		1.41865	0.435992	0.0887732		1.41865	0.309734	0.164904
		1.52778	0.399758	0.742597		1.52778	0.595988	0.965819		1.52778	0.541275	0.499883		1.52778	0.353694	0.479421		1.52778	0.433891	0.8675		1.52778	0.327851	0.49499		1.52778	0.794047	0.55631		1.52778	0.449547	0.272872		1.52778	0.420135	0.90091		1.52778	0.506877	0.142969		1.52778	0.437863	0.119074		1.52778	0.31123	0.201991
		1.6369	0.373019	0.56904		1.6369	0.575581	1		1.6369	0.637292	0.522018		1.6369	0.410015	0.47728		1.6369	0.480794	0.841874		1.6369	0.386281	0.523193		1.6369	0.92612	0.52797		1.6369	0.492169	0.269326		1.6369	0.460592	0.759914		1.6369	0.505886	0.144886		1.6369	0.445178	0.170221		1.6369	0.347192	0.244203
		1.74603	0.374528	0.587091		1.74603	0.512863	0.628		1.74603	0.68496	0.712824		1.74603	0.474769	0.566761		1.74603	0.495184	0.805004		1.74603	0.356747	0.629284		1.74603	0.999357	0.497257		1.74603	0.567605	0.231062		1.74603	0.485381	0.582661		1.74603	0.542764	0.201466		1.74603	0.428908	0.250582		1.74603	0.393843	0.301602
		1.85516	0.32556	0.358717		1.85516	0.447051	0.401477		1.85516	0.737209	0.793127		1.85516	0.541988	0.732282		1.85516	0.533578	0.822507		1.85516	0.378538	0.800743		1.85516	1	0.524278		1.85516	0.577584	0.1941		1.85516	0.57239	0.412671		1.85516	0.48056	0.253064		1.85516	0.460013	0.277248		1.85516	0.438428	0.380269
		1.96429	0.35605	0.460723		1.96429	0.399175	0.42641		1.96429	0.691532	0.955581		1.96429	0.625294	0.894178		1.96429	0.500606	1		1.96429	0.387109	1		1.96429	0.906455	0.469795		1.96429	0.636275	0.165216		1.96429	0.630021	0.279594		1.96429	0.478064	0.314687		1.96429	0.500396	0.246939		1.96429	0.425771	0.49957
		2.07341	0.355705	0.409082		2.07341	0.377196	0.51947		2.07341	0.580423	0.98929		2.07341	0.738712	1		2.07341	0.489657	0.978174		2.07341	0.43143	0.753542		2.07341	0.800174	0.339377		2.07341	0.65312	0.157699		2.07341	0.670216	0.194216		2.07341	0.486797	0.314914		2.07341	0.526265	0.213112		2.07341	0.41999	0.736869
		2.18254	0.364166	0.242695		2.18254	0.361228	0.55365		2.18254	0.501489	1		2.18254	0.737105	0.988333		2.18254	0.438074	0.899212		2.18254	0.439055	0.748361		2.18254	0.742842	0.322411		2.18254	0.637212	0.158288		2.18254	0.690076	0.151981		2.18254	0.484758	0.329027		2.18254	0.527416	0.228242		2.18254	0.416209	0.856187
		2.29167	0.397605	0.321681		2.29167	0.322227	0.262396		2.29167	0.468858	0.994123		2.29167	0.701918	0.912003		2.29167	0.418796	0.760463		2.29167	0.427073	0.763135		2.29167	0.721826	0.289822		2.29167	0.571086	0.108077		2.29167	0.6567	0.153678		2.29167	0.466198	0.390687		2.29167	0.508252	0.174805		2.29167	0.405022	0.963281
		2.40079	0.38435	0.333435		2.40079	0.383211	0.242456		2.40079	0.468181	0.805477		2.40079	0.660582	0.780442		2.40079	0.408545	0.542101		2.40079	0.382351	0.68274		2.40079	0.675925	0.277184		2.40079	0.527372	0.101807		2.40079	0.596649	0.164354		2.40079	0.427548	0.484135		2.40079	0.520334	0.174773		2.40079	0.397338	1
		2.50992	0.420084	0.395201		2.50992	0.357474	0.310798		2.50992	0.449148	0.771023		2.50992	0.612711	0.69294		2.50992	0.381376	0.419123		2.50992	0.340358	0.787494		2.50992	0.625919	0.234108		2.50992	0.541802	0.145467		2.50992	0.573218	0.261842		2.50992	0.446753	0.724515		2.50992	0.496884	0.156407		2.50992	0.399187	0.958203
		2.61905	0.393604	0.387696		2.61905	0.358954	0.219974		2.61905	0.439684	0.791836		2.61905	0.580256	0.593012		2.61905	0.364749	0.349221		2.61905	0.32071	0.525388		2.61905	0.614929	0.289723		2.61905	0.549628	0.139252		2.61905	0.526954	0.419469		2.61905	0.474523	0.950925		2.61905	0.494389	0.244246		2.61905	0.392385	0.805384
		2.72817	0.420675	0.299632		2.72817	0.371828	0.358134		2.72817	0.414522	0.65376		2.72817	0.562069	0.534677		2.72817	0.361564	0.327015		2.72817	0.323016	0.4164		2.72817	0.619137	0.302229		2.72817	0.555144	0.144258		2.72817	0.519783	0.522187		2.72817	0.473904	1		2.72817	0.482777	0.411259		2.72817	0.376276	0.583765
		2.8373	0.425517	0.256373		2.8373	0.384262	0.415595		2.8373	0.437671	0.771737		2.8373	0.527433	0.625309		2.8373	0.352388	0.367191		2.8373	0.304057	0.348682		2.8373	0.592745	0.32947		2.8373	0.572883	0.162367		2.8373	0.486252	0.542968		2.8373	0.466186	0.852178		2.8373	0.492307	0.589075		2.8373	0.401524	0.405041
		2.94643	0.414438	0.468998		2.94643	0.393146	0.455892		2.94643	0.458777	0.820332		2.94643	0.525221	0.475916		2.94643	0.366181	0.352671		2.94643	0.327401	0.617044		2.94643	0.59875	0.444082		2.94643	0.619652	0.230557		2.94643	0.496802	0.508609		2.94643	0.461643	0.6071		2.94643	0.495444	0.725461		2.94643	0.3721	0.301866
		3.05556	0.463732	0.515571		3.05556	0.400863	0.639353		3.05556	0.469707	0.814079		3.05556	0.485742	0.47357		3.05556	0.370504	0.181743		3.05556	0.310104	0.419513		3.05556	0.58532	0.546398		3.05556	0.636169	0.247044		3.05556	0.525812	0.39747		3.05556	0.487779	0.387577		3.05556	0.499338	0.681423		3.05556	0.397715	0.254562
		3.16468	0.493599	0.437965		3.16468	0.357981	0.57934		3.16468	0.492169	0.929934		3.16468	0.460341	0.482056		3.16468	0.373033	0.223443		3.16468	0.294911	0.49991		3.16468	0.589268	0.536519		3.16468	0.592	0.364232		3.16468	0.501894	0.275979		3.16468	0.509115	0.227847		3.16468	0.459658	0.506879		3.16468	0.389112	0.225582
		3.27381	0.518549	0.483089		3.27381	0.398448	0.57559		3.27381	0.50165	0.831543		3.27381	0.438895	0.420711		3.27381	0.357516	0.14087		3.27381	0.306196	0.292892		3.27381	0.589052	0.520751		3.27381	0.576989	0.488354		3.27381	0.473515	0.204581		3.27381	0.499631	0.166072		3.27381	0.448499	0.355999		3.27381	0.39462	0.222524
		3.38294	0.534625	0.606504		3.38294	0.346159	0.500533		3.38294	0.49901	0.898199		3.38294	0.40765	0.341524		3.38294	0.35503	0.146328		3.38294	0.307541	0.483149		3.38294	0.591904	0.384809		3.38294	0.554357	0.66229		3.38294	0.460922	0.132517		3.38294	0.506859	0.167167		3.38294	0.43441	0.26027		3.38294	0.384685	0.196164
		3.49206	0.495633	0.65833		3.49206	0.379874	0.516272		3.49206	0.49372	0.841977		3.49206	0.389544	0.352619		3.49206	0.340314	0.182668		3.49206	0.296985	0.366252		3.49206	0.652595	0.428049		3.49206	0.53082	0.758535		3.49206	0.499128	0.133122		3.49206	0.520162	0.141995		3.49206	0.442406	0.236836		3.49206	0.405078	0.18718
		3.60119	0.491566	0.587287		3.60119	0.362592	0.56793		3.60119	0.47908	0.744272		3.60119	0.374161	0.351075		3.60119	0.337227	0.12092		3.60119	0.265032	0.348439		3.60119	0.67281	0.455959		3.60119	0.535369	0.812785		3.60119	0.463718	0.141814		3.60119	0.510833	0.131664		3.60119	0.452465	0.371797		3.60119	0.450144	0.17134
		3.71032	0.489301	0.650012		3.71032	0.370245	0.557284		3.71032	0.452301	0.648532		3.71032	0.370267	0.2662		3.71032	0.333305	0.0404873		3.71032	0.280289	0.455235		3.71032	0.695697	0.405786		3.71032	0.556066	0.826123		3.71032	0.496506	0.125638		3.71032	0.510855	0.111398		3.71032	0.439638	0.476316		3.71032	0.447448	0.203833
		3.81944	0.446394	0.63855		3.81944	0.325033	0.484685		3.81944	0.437797	0.723957		3.81944	0.336096	0.257808		3.81944	0.331771	0.13192		3.81944	0.274158	0.499816		3.81944	0.726072	0.49335		3.81944	0.524893	0.877081		3.81944	0.513195	0.13931		3.81944	0.520626	0.115638		3.81944	0.458785	0.64628		3.81944	0.43805	0.151205
		3.92857	0.388685	0.635104		3.92857	0.304452	0.564552		3.92857	0.387551	0.59173		3.92857	0.28744	0.29518		3.92857	0.290849	0.100734		3.92857	0.286206	0.203595		3.92857	0.738057	0.66505		3.92857	0.516945	0.847186		3.92857	0.517804	0.129765		3.92857	0.577841	0.150357		3.92857	0.471586	0.805274		3.92857	0.456065	0.137372
		4.0377	0.368264	0.468966		4.0377	0.276538	0.406694		4.0377	0.330085	0.698664		4.0377	0.275678	0.231301		4.0377	0.300806	0.0224706		4.0377	0.270368	0.339996		4.0377	0.713281	0.767437		4.0377	0.536042	0.869542		4.0377	0.537584	0.121274		4.0377	0.617779	0.1257		4.0377	0.49783	0.959926		4.0377	0.464902	0.163978
		4.14683	0.289535	0.513943		4.14683	0.246897	0.26675		4.14683	0.30166	0.553689		4.14683	0.273948	0.173956		4.14683	0.254779	0.00201184		4.14683	0.265633	0.444771		4.14683	0.671031	0.979354		4.14683	0.56577	0.916647		4.14683	0.549261	0.118005		4.14683	0.610782	0.141912		4.14683	0.525668	1		4.14683	0.485363	0.121593
		4.25595	0.296452	0.385803		4.25595	0.225527	0.304548		4.25595	0.330081	0.579624		4.25595	0.252598	0.145155		4.25595	0.229096	0		4.25595	0.255143	0.434219		4.25595	0.640631	1		4.25595	0.576999	1		4.25595	0.56169	0.112777		4.25595	0.592126	0.158722		4.25595	0.586858	0.92845		4.25595	0.508083	0.0974527
		4.36508	0.280444	0.299176		4.36508	0.226406	0.230635		4.36508	0.289297	0.429181		4.36508	0.227838	0.114811		4.36508	0.215149	0.129836		4.36508	0.245731	0.436251		4.36508	0.574051	0.848704		4.36508	0.582418	0.954123		4.36508	0.566075	0.0903077		4.36508	0.54552	0.179753		4.36508	0.632884	0.748163		4.36508	0.508981	0.133012
		4.47421	0.252215	0.194862		4.47421	0.205535	0.163155		4.47421	0.292021	0.319293		4.47421	0.205907	0.133931		4.47421	0.236864	0.0653648		4.47421	0.229713	0.379135		4.47421	0.528712	0.721933		4.47421	0.540618	0.846724		4.47421	0.577793	0.0569316		4.47421	0.497369	0.18344		4.47421	0.659726	0.625752		4.47421	0.537277	0.164696
		4.58333	0.20806	0.144653						4.58333	0.288576	0.24295		4.58333	0.205376	0.190126		4.58333	0.193623	0.0395962		4.58333	0.192192	0.485372		4.58333	0.467857	0.589495		4.58333	0.521277	0.819818		4.58333	0.518729	0.093561		4.58333	0.467871	0.194021		4.58333	0.695022	0.39377		4.58333	0.544731	0.193504
		4.69246	0.251953	0.0627521						4.69246	0.293483	0.180829		4.69246	0.185859	0.0902144		4.69246	0.23046	0.0875559		4.69246	0.197552	0.34028		4.69246	0.462951	0.476031		4.69246	0.5046	0.744636		4.69246	0.475228	0.068884		4.69246	0.405336	0.256947		4.69246	0.734581	0.252703		4.69246	0.522221	0.212835
																						4.80159	0.194963	0.203173		4.80159	0.470018	0.340006		4.80159	0.454611	0.673254		4.80159	0.39229	0.0533441		4.80159	0.372076	0.400909		4.80159	0.738589	0.191944		4.80159	0.429036	0.259113
																						4.91071	0.210246	0.205533		4.91071	0.451181	0.209152		4.91071	0.407618	0.500614		4.91071	0.374149	0.023358		4.91071	0.335745	0.547724		4.91071	0.663504	0.0799825		4.91071	0.36425	0.266687
																						5.01984	0.166592	0.15968		5.01984	0.432337	0.153068		5.01984	0.379337	0.322577		5.01984	0.348578	0.0207806		5.01984	0.316554	0.645669		5.01984	0.577791	0.116506		5.01984	0.297672	0.243377
																										5.12897	0.41061	0.0399572		5.12897	0.384799	0.207234		5.12897	0.328418	0.0378193		5.12897	0.289617	0.611919		5.12897	0.431994	0.0630087		5.12897	0.311006	0.191782
																																														5.2381	0.265054	0.153117
[truncated: 27 more columns]

## Sheet: v2
frame #	83				84				85				86				87				88				89				90				91				92				93				94				95
			Rab5	Snx1			Rab5	Snx1			Rab5	Snx1			Rab5	Snx1			Rab5	Snx1			Rab5	Snx1			Rab5	Snx1			Rab5	Snx1			Rab5	Snx1			Rab5	Snx1			Rab5	Snx1			Rab5	Snx1
		0	418.354	304.433		0	393.667	311.284		0	439.712	305.005		0	393.545	299.071		0	401.304	301.359		0	379.056	289.611		0	498.789	324.319		0	481.72	384.476		0	460.858	322.277		0	439.94	455.713		0	500.688	315.962		0	429.955	314.636
		0.10913	412.717	314.548		0.10913	393.944	304.916		0.10913	431.172	297.742		0.10913	398.531	292.708		0.10913	382.13	301.049		0.10913	378.127	285.242		0.10913	502.726	327.613		0.10913	471.372	359.989		0.10913	462.708	317.365		0.10913	442.205	402.676		0.10913	478.165	313.797		0.10913	434.391	292.688
		0.21825	396.57	304.985		0.21825	404.124	306.81		0.21825	423.064	302.195		0.21825	396.792	304.176		0.21825	376.675	303.079		0.21825	379.494	284.921		0.21825	510.748	316.432		0.21825	463.644	346.174		0.21825	459.905	316.415		0.21825	441.211	362.395		0.21825	459.78	307.326		0.21825	420.714	299.966
		0.32738	400.768	297.736		0.32738	397.138	305.79		0.32738	403.087	307.533		0.32738	401.132	311.494		0.32738	387.107	304.126		0.32738	388.088	282.079		0.32738	498.836	321.957		0.32738	457.316	328.827		0.32738	456.957	310.23		0.32738	439.342	343.36		0.32738	441.116	307.174		0.32738	406.41	297.076
		0.43651	395.819	303.32		0.43651	397.524	310.282		0.43651	416.75	296.36		0.43651	426.48	296.067		0.43651	387.731	314.623		0.43651	388.114	282.28		0.43651	514.651	322.84		0.43651	458.995	334.316		0.43651	451.171	320.873		0.43651	445.763	328.506		0.43651	438.018	305.787		0.43651	407.564	294.199
		0.54563	405.944	311.302		0.54563	400.803	310.2		0.54563	415.586	299.531		0.54563	413.296	309.824		0.54563	381.82	306.412		0.54563	396.219	285.855		0.54563	506.621	324.845		0.54563	463.879	338.778		0.54563	444.622	334.484		0.54563	451.958	312.76		0.54563	431.668	303.146		0.54563	402.781	291.267
		0.65476	416.54	317.14		0.65476	387.889	322.691		0.65476	407.945	294.8		0.65476	411.698	318.721		0.65476	389.379	304.944		0.65476	396.054	293.833		0.65476	514.09	330.286		0.65476	480.432	333.69		0.65476	439.065	347.019		0.65476	440.324	315.901		0.65476	436.476	303.334		0.65476	407.187	294.21
		0.76389	440.475	314.883		0.76389	394.771	310.966		0.76389	417.508	304.541		0.76389	413.853	328.155		0.76389	405.517	305.461		0.76389	388.938	295.171		0.76389	509.888	329.9		0.76389	494.318	334.405		0.76389	444.275	373.358		0.76389	449.293	310.252		0.76389	453.249	304.864		0.76389	424.152	304.436
		0.87302	478.166	326.568		0.87302	394.695	323.411		0.87302	445.234	299.413		0.87302	421.811	322.893		0.87302	420.351	305.859		0.87302	385.078	292.443		0.87302	517.382	333.841		0.87302	495.286	333.111		0.87302	458.403	422.865		0.87302	462.308	318.376		0.87302	451.405	304.576		0.87302	417.52	304.144
		0.98214	547.685	345.623		0.98214	415.056	329.386		0.98214	465.931	306.638		0.98214	427.443	334.981		0.98214	418.896	324.758		0.98214	402.795	293.401		0.98214	520.829	341.423		0.98214	500.193	334.145		0.98214	461.007	486.286		0.98214	483.229	321.523		0.98214	452.806	305.034		0.98214	417.247	309.344
		1.09127	596.131	350.545		1.09127	442.112	323.764		1.09127	501.051	316.051		1.09127	420.113	331.068		1.09127	445.796	332.961		1.09127	414.589	295.748		1.09127	539.837	362.79		1.09127	500.895	341.187		1.09127	462.335	577.04		1.09127	507.745	315.373		1.09127	452.092	304.156		1.09127	421.576	298.2
		1.2004	582.23	366.727		1.2004	469.332	340.235		1.2004	527.176	315.261		1.2004	425.692	336.107		1.2004	460.654	340.742		1.2004	427.464	302.092		1.2004	562.348	387.738		1.2004	489.008	357.403		1.2004	478.384	658.339		1.2004	526.696	320.581		1.2004	477.428	305.21		1.2004	426.469	314.99
		1.30952	555.337	391.177		1.30952	521.208	349.234		1.30952	535.462	320.88		1.30952	449.502	337.08		1.30952	472.572	346.955		1.30952	438.034	303.067		1.30952	595.165	419.673		1.30952	488.565	377.974		1.30952	483.839	686.974		1.30952	565.082	324.739		1.30952	493.051	309.678		1.30952	431.669	319.952
		1.41865	526.345	392.556		1.41865	570.683	355.673		1.41865	538.749	323.003		1.41865	468.61	348.49		1.41865	499.277	357.098		1.41865	435.537	312.183		1.41865	644.554	423.431		1.41865	492.304	398.093		1.41865	496.62	705.213		1.41865	561.644	333.562		1.41865	512.517	325.201		1.41865	449.293	329.391
		1.52778	494.373	368.149		1.52778	592.636	364.371		1.52778	565.238	332.253		1.52778	471.306	348.922		1.52778	511.465	369.08		1.52778	458.365	314.213		1.52778	691.815	417.232		1.52778	519.305	416.856		1.52778	504.577	666.074		1.52778	548.013	347.988		1.52778	513.454	332.729		1.52778	450.042	337.965
		1.6369	480.983	351.692		1.6369	582.417	366.476		1.6369	613.319	333.912		1.6369	499.509	348.671		1.6369	534.952	366.972		1.6369	487.624	316.043		1.6369	757.951	412.097		1.6369	540.648	415.712		1.6369	524.836	610.383		1.6369	547.517	348.494		1.6369	517.117	345.436		1.6369	468.05	347.724
		1.74603	481.739	353.404		1.74603	551.011	343.575		1.74603	637.189	348.208		1.74603	531.935	359.163		1.74603	542.158	363.939		1.74603	472.835	322.931		1.74603	794.625	406.532		1.74603	578.423	403.368		1.74603	537.249	540.371		1.74603	565.984	363.428		1.74603	508.97	365.401		1.74603	491.411	360.994
		1.85516	457.218	331.75		1.85516	518.055	329.63		1.85516	663.353	354.224		1.85516	565.595	378.571		1.85516	561.384	365.379		1.85516	483.747	334.062		1.85516	794.947	411.428		1.85516	583.42	391.444		1.85516	580.819	473.228		1.85516	534.835	377.047		1.85516	524.546	372.026		1.85516	513.737	379.181
		1.96429	472.486	341.422		1.96429	494.081	331.165		1.96429	640.48	366.396		1.96429	607.311	397.554		1.96429	544.873	379.98		1.96429	488.039	346.997		1.96429	748.104	401.556		1.96429	612.81	382.126		1.96429	609.678	420.665		1.96429	533.585	393.312		1.96429	544.768	364.496		1.96429	507.399	406.762
		2.07341	472.313	336.525		2.07341	483.075	336.894		2.07341	584.842	368.921		2.07341	664.106	409.962		2.07341	539.39	378.185		2.07341	510.233	330.997		2.07341	694.883	377.925		2.07341	621.245	379.701		2.07341	629.806	386.942		2.07341	537.958	393.372		2.07341	557.722	356.092		2.07341	504.504	461.623
		2.18254	476.55	320.749		2.18254	475.079	338.998		2.18254	545.315	369.724		2.18254	663.301	408.594		2.18254	513.56	371.689		2.18254	514.051	330.661		2.18254	666.174	374.851		2.18254	613.279	379.891		2.18254	639.751	370.26		2.18254	536.937	397.097		2.18254	558.298	359.851		2.18254	502.611	489.208
		2.29167	493.295	328.238		2.29167	455.549	321.069		2.29167	528.975	369.284		2.29167	645.681	399.644		2.29167	503.906	360.275		2.29167	508.051	331.62		2.29167	655.65	368.946		2.29167	580.166	363.693		2.29167	623.038	370.93		2.29167	527.643	413.372		2.29167	548.702	346.575		2.29167	497.009	513.967
		2.40079	486.657	329.353		2.40079	486.087	319.841		2.40079	528.636	355.149		2.40079	624.982	384.218		2.40079	498.773	342.312		2.40079	485.656	326.401		2.40079	632.665	366.656		2.40079	558.276	361.67		2.40079	592.967	375.147		2.40079	508.289	438.037		2.40079	554.752	346.567		2.40079	493.161	522.456
		2.50992	504.551	335.209		2.50992	473.199	324.048		2.50992	519.105	352.568		2.50992	601.01	373.958		2.50992	485.168	332.196		2.50992	464.628	333.201		2.50992	607.624	358.851		2.50992	565.502	375.755		2.50992	581.234	413.653		2.50992	517.906	501.484		2.50992	543.009	342.004		2.50992	494.087	512.793
		2.61905	491.291	334.498		2.61905	473.94	318.457		2.61905	514.366	354.127		2.61905	584.758	362.241		2.61905	476.842	326.445		2.61905	454.789	316.186		2.61905	602.121	368.928		2.61905	569.421	373.75		2.61905	558.067	475.913		2.61905	531.812	561.244		2.61905	541.76	363.827		2.61905	490.681	477.463
		2.72817	504.847	326.147		2.72817	480.387	326.962		2.72817	501.766	343.782		2.72817	575.651	355.401		2.72817	475.247	324.619		2.72817	455.944	309.111		2.72817	604.228	371.194		2.72817	572.183	375.365		2.72817	554.476	516.485		2.72817	531.502	574.197		2.72817	535.945	405.32		2.72817	482.614	426.227
		2.8373	507.272	322.046		2.8373	486.613	330.5		2.8373	513.358	352.622		2.8373	558.307	366.028		2.8373	470.652	327.924		2.8373	446.45	304.715		2.8373	591.012	376.13		2.8373	581.066	381.207		2.8373	537.685	524.693		2.8373	527.637	535.18		2.8373	540.717	449.497		2.8373	495.257	384.908
		2.94643	501.724	342.207		2.94643	491.062	332.98		2.94643	523.927	356.262		2.94643	557.199	348.511		2.94643	477.559	326.729		2.94643	458.14	322.136		2.94643	594.019	396.897		2.94643	604.486	403.205		2.94643	542.968	511.122		2.94643	525.362	470.493		2.94643	542.288	483.381		2.94643	480.523	361.055
		3.05556	526.408	346.623		3.05556	494.926	344.274		3.05556	529.4	355.794		3.05556	537.43	348.236		3.05556	479.724	312.668		3.05556	449.478	309.313		3.05556	587.294	415.436		3.05556	612.757	408.524		3.05556	557.495	467.224		3.05556	538.45	412.551		3.05556	544.238	472.44		3.05556	493.35	350.119
		3.16468	541.364	339.264		3.16468	473.453	340.58		3.16468	540.648	364.474		3.16468	524.71	349.231		3.16468	480.99	316.099		3.16468	441.87	314.532		3.16468	589.271	413.646		3.16468	590.639	446.329		3.16468	545.518	419.237		3.16468	549.134	370.391		3.16468	524.368	429.076		3.16468	489.042	343.419
		3.27381	553.858	343.543		3.27381	493.717	340.349		3.27381	545.396	357.103		3.27381	513.971	342.038		3.27381	473.22	309.306		3.27381	447.521	301.093		3.27381	589.163	410.789		3.27381	583.122	486.371		3.27381	531.307	391.036		3.27381	544.385	354.086		3.27381	518.78	391.591		3.27381	491.8	342.712
		3.38294	561.908	355.245		3.38294	467.533	335.728		3.38294	544.074	362.097		3.38294	498.325	332.753		3.38294	471.975	309.755		3.38294	448.195	313.444		3.38294	590.591	386.157		3.38294	571.789	542.483		3.38294	525.001	362.572		3.38294	548.004	354.375		3.38294	511.725	367.808		3.38294	486.825	336.618
		3.49206	542.383	360.159		3.49206	484.416	336.697		3.49206	541.425	357.884		3.49206	489.258	334.054		3.49206	464.606	312.744		3.49206	442.909	305.855		3.49206	620.982	393.992		3.49206	560.003	573.532		3.49206	544.133	362.811		3.49206	554.666	347.731		3.49206	515.729	361.986		3.49206	497.037	334.541
		3.60119	540.346	353.423		3.60119	475.762	339.877		3.60119	534.094	350.564		3.60119	481.555	333.873		3.60119	463.06	307.665		3.60119	426.908	304.699		3.60119	631.105	399.049		3.60119	562.281	591.033		3.60119	526.401	366.244		3.60119	549.994	345.004		3.60119	520.766	395.516		3.60119	519.604	330.879
		3.71032	539.212	359.37		3.71032	479.594	339.222		3.71032	520.684	343.391		3.71032	479.605	323.921		3.71032	461.096	301.048		3.71032	434.548	311.632		3.71032	642.566	389.958		3.71032	572.645	595.336		3.71032	542.82	359.855		3.71032	550.005	339.655		3.71032	514.343	421.483		3.71032	518.254	338.391
		3.81944	517.726	358.283		3.81944	456.954	334.753		3.81944	513.421	349.042		3.81944	462.494	322.937		3.81944	460.328	308.57		3.81944	431.478	314.526		3.81944	657.776	405.824		3.81944	557.035	611.775		3.81944	551.177	365.255		3.81944	554.898	340.774		3.81944	523.931	463.709		3.81944	513.548	326.224
		3.92857	488.828	357.957		3.92857	446.648	339.669		3.92857	488.26	339.135		3.92857	438.129	327.319		3.92857	439.836	306.004		3.92857	437.511	295.296		3.92857	663.778	436.935		3.92857	553.055	602.131		3.92857	553.485	361.485		3.92857	583.549	349.938		3.92857	530.341	503.21		3.92857	522.569	323.026
		4.0377	478.602	342.204		4.0377	432.67	329.952		4.0377	459.484	347.147		4.0377	432.239	319.829		4.0377	444.822	299.566		4.0377	429.58	304.151		4.0377	651.371	455.487		4.0377	562.618	609.343		4.0377	563.39	358.131		4.0377	603.548	343.43		4.0377	543.483	541.632		4.0377	526.994	329.177
		4.14683	439.178	346.468		4.14683	417.827	321.337		4.14683	445.25	336.285		4.14683	431.373	313.105		4.14683	421.774	297.883		4.14683	427.209	310.952		4.14683	630.214	493.885		4.14683	577.504	624.539		4.14683	569.237	356.84		4.14683	600.044	347.709		4.14683	557.423	551.588		4.14683	537.24	319.378
		4.25595	442.642	334.318		4.25595	407.126	323.663		4.25595	459.482	338.228		4.25595	420.682	309.728		4.25595	408.913	297.717		4.25595	421.956	310.267		4.25595	614.991	497.626		4.25595	583.127	651.429		4.25595	575.461	354.775		4.25595	590.702	352.146		4.25595	588.064	533.812		4.25595	548.617	313.797
		4.36508	434.626	326.104		4.36508	407.566	319.113		4.36508	439.059	326.956		4.36508	408.283	306.17		4.36508	401.929	308.398		4.36508	417.243	310.399		4.36508	581.651	470.212		4.36508	585.841	636.629		4.36508	577.657	345.9		4.36508	567.364	357.697		4.36508	611.112	489.021		4.36508	549.067	322.018
		4.47421	420.49	316.213		4.47421	397.115	314.959		4.47421	440.423	318.723		4.47421	397.301	308.412		4.47421	412.803	303.094		4.47421	409.222	306.692		4.47421	558.947	447.242		4.47421	564.909	601.982		4.47421	583.525	332.717		4.47421	543.252	358.67		4.47421	624.553	458.609		4.47421	563.236	329.343
		4.58333	398.379	311.452						4.58333	438.698	313.003		4.58333	397.035	315.001		4.58333	391.15	300.975		4.58333	390.433	313.588		4.58333	528.474	423.245		4.58333	555.224	593.302		4.58333	553.948	347.185		4.58333	528.481	361.463		4.58333	642.228	400.975		4.58333	566.969	336.003
		4.69246	420.359	303.687						4.69246	441.155	308.349		4.69246	387.262	303.286		4.69246	409.596	304.92		4.69246	393.117	304.169		4.69246	526.017	402.686		4.69246	546.873	569.048		4.69246	532.165	337.438		4.69246	497.166	378.072		4.69246	662.037	365.928		4.69246	555.697	340.472
																						4.80159	391.821	295.268		4.80159	529.556	378.039		4.80159	521.841	546.02		4.80159	490.633	331.3		4.80159	480.511	416.07		4.80159	664.044	350.833		4.80159	509.034	351.171
																						4.91071	399.474	295.422		4.91071	520.123	354.329		4.91071	498.309	490.326		4.91071	481.549	319.456		4.91071	462.318	454.821		4.91071	626.445	323.017		4.91071	476.592	352.922
																						5.01984	377.614	292.445		5.01984	510.687	344.167		5.01984	484.147	432.891		5.01984	468.744	318.438		5.01984	452.708	480.673		5.01984	583.524	332.091		5.01984	443.253	347.533
																										5.12897	499.807	323.672		5.12897	486.882	395.681		5.12897	458.649	325.168		5.12897	439.219	471.765		5.12897	510.515	318.8		5.12897	449.93	335.605
																																														5.2381	426.919	326.666
	min		395.819	297.736			387.889	304.916			403.087	294.8			387.262	292.708			376.675	297.717			377.614	282.079			498.789	316.432			457.316	328.827			439.065	310.23			439.219	310.252			431.668	303.146			402.781	291.267
	max		596.131	392.556			592.636	366.476			663.353	369.724			664.106	409.962			561.384	379.98			514.051	346.997			794.947	497.626			621.245	651.429			639.751	705.213			603.548	574.197			664.044	551.588			566.969	522.456
	overall min		294.192	274.272
	overall max		794.947	705.213
	overall min		294.192	274.272			294.192	274.272			294.192	274.272			294.192	274.272			294.192	274.272			294.192	274.272			294.192	274.272			294.192	274.272			294.192	274.272			294.192	274.272			294.192	274.272			294.192	274.272
	overall max		794.947	705.213			794.947	705.213			794.947	705.213			794.947	705.213			794.947	705.213			794.947	705.213			794.947	705.213			794.947	705.213			794.947	705.213			794.947	705.213			794.947	705.213			794.947	705.213
	both Rab5 and Snx1 normalised for individual min-max
frame #	83				84				85				86				87				88				89				90				91				92				93				94				95
			Rab5	Snx1			Rab5	Snx1			Rab5	Snx1			Rab5	Snx1			Rab5	Snx1			Rab5	Snx1			Rab5	Snx1			Rab5	Snx1			Rab5	Snx1			Rab5	Snx1			Rab5	Snx1			Rab5	Snx1
		0	0.1125	0.070627		0	0.0282202	0.10346		0	0.140721	0.136208		0	0.0226951	0.0542668		0	0.133339	0.044269		0	0.010569	0.116022		0	0	0.0435279		0	0.148869	0.1725		0	0.108593	0.0305		0	0.00438754	0.551103		0	0.297019	0.0515855		0	0.165505	0.101082
		0.10913	0.0843584	0.177305		0.10913	0.0295731	0		0.10913	0.107909	0.0392666		0.10913	0.0407052	0		0.10913	0.0295329	0.0405031		0.10913	0.00375998	0.0487291		0.10913	0.0132936	0.0617073		0.10913	0.0857444	0.0965958		0.10913	0.117811	0.0180641		0.10913	0.0181709	0.350164		0.10913	0.200094	0.0428712		0.10913	0.192523	0.00614649
		0.21825	0.00374915	0.0764487		0.21825	0.079293	0.03077		0.21825	0.0767561	0.0986991		0.21825	0.0344237	0.0978048		0.21825	0	0.0651703		0.21825	0.0137793	0.0437813		0.21825	0.0403805	0		0.21825	0.0386021	0.0537721		0.21825	0.103844	0.0156589		0.21825	0.012122	0.197553		0.21825	0.120976	0.0168249		0.21825	0.109222	0.0376272
		0.32738	0.0247065	0		0.32738	0.0451728	0.014204		0.32738	0	0.169945		0.32738	0.0501004	0.160216		0.32738	0.056478	0.0779063		0.32738	0.076768	0		0.32738	0.000158699	0.0304922		0.32738	0	0		0.32738	0.0891542	0		0.32738	0.000748498	0.125435		0.32738	0.0406582	0.016213		0.32738	0.0221027	0.0251266
		0.43651	0	0.0588826		0.43651	0.0470581	0.08718		0.43651	0.0524963	0.0208132		0.43651	0.141661	0.0286472		0.43651	0.0598563	0.205502		0.43651	0.0769586	0.00309467		0.43651	0.0535592	0.0353654		0.43651	0.0102422	0.0170148		0.43651	0.0603231	0.0269455		0.43651	0.0398226	0.0691583		0.43651	0.0273264	0.0106302		0.43651	0.0291312	0.0126823
		0.54563	0.0505461	0.143068		0.54563	0.063073	0.0858366		0.54563	0.0480239	0.0631349		0.54563	0.0940385	0.145974		0.54563	0.0278546	0.105692		0.54563	0.136363	0.0581733		0.54563	0.0264453	0.0464309		0.54563	0.0400356	0.0308461		0.54563	0.02769	0.0614052		0.54563	0.0775213	0.00950198		0.54563	0	0		0.54563	0	0
		0.65476	0.103444	0.204633		0.65476	0	0.288751		0.65476	0.0186655	0		0.65476	0.0882663	0.221852		0.65476	0.0687785	0.0878513		0.65476	0.135154	0.181065		0.65476	0.051665	0.0764595		0.65476	0.141012	0.0150743		0.65476	0	0.0931407		0.65476	0.00672432	0.0214022		0.65476	0.0206906	0.000756716		0.65476	0.0268351	0.0127298
		0.76389	0.222932	0.180838		0.76389	0.0336122	0.0982797		0.76389	0.0554087	0.130012		0.76389	0.0960505	0.30231		0.76389	0.156148	0.0941348		0.76389	0.082998	0.201674		0.76389	0.0374766	0.0743292		0.76389	0.22572	0.0172907		0.76389	0.025961	0.159825		0.76389	0.0613038	0		0.76389	0.092871	0.00691509		0.76389	0.130162	0.0569621
		0.87302	0.411094	0.304071		0.87302	0.033241	0.30044		0.87302	0.161938	0.0615693		0.87302	0.124796	0.257433		0.87302	0.236458	0.0989729		0.87302	0.0547066	0.159658		0.87302	0.0627807	0.0960793		0.87302	0.231625	0.0132795		0.87302	0.0963595	0.285164		0.87302	0.140505	0.0307791		0.87302	0.0849356	0.00575587		0.87302	0.089769	0.055699
		0.98214	0.758147	0.505032		0.98214	0.132686	0.3975		0.98214	0.241461	0.158002		0.98214	0.14514	0.360525		0.98214	0.228581	0.328714		0.98214	0.184561	0.1744		0.98214	0.0744197	0.137924		0.98214	0.261558	0.0164847		0.98214	0.109335	0.445731		0.98214	0.267816	0.0427021		0.98214	0.0909646	0.00759936		0.98214	0.0881063	0.0781914
		1.09127	1	0.556935		1.09127	0.264829	0.306184		1.09127	0.3764	0.283633		1.09127	0.118662	0.327153		1.09127	0.374216	0.428428		1.09127	0.271004	0.210568		1.09127	0.138602	0.255847		1.09127	0.265841	0.0383135		1.09127	0.115952	0.675497		1.09127	0.417005	0.0194018		1.09127	0.087892	0.00406534		1.09127	0.114472	0.0299885
		1.2004	0.930603	0.727596		1.2004	0.397774	0.573741		1.2004	0.476778	0.273084		1.2004	0.138815	0.370128		1.2004	0.454656	0.523012		1.2004	0.36537	0.308279		1.2004	0.214612	0.393534		1.2004	0.193328	0.0885797		1.2004	0.195923	0.881327		1.2004	0.532328	0.0391332		1.2004	0.196922	0.00830777		1.2004	0.144274	0.102613
		1.30952	0.796348	0.985462		1.30952	0.65114	0.71993		1.30952	0.508614	0.348086		1.30952	0.22482	0.378426		1.30952	0.519179	0.598536		1.30952	0.442842	0.3233		1.30952	0.325421	0.569782		1.30952	0.190625	0.152346		1.30952	0.223105	0.953823		1.30952	0.765921	0.0548864		1.30952	0.264154	0.0262919		1.30952	0.175945	0.124076
		1.41865	0.651613	1		1.41865	0.89278	0.824519		1.41865	0.521244	0.376426		1.41865	0.293841	0.475736		1.41865	0.663758	0.721844		1.41865	0.42454	0.46373		1.41865	0.492187	0.590522		1.41865	0.213434	0.21471		1.41865	0.286791	1		1.41865	0.744999	0.0883139		1.41865	0.347923	0.0887732		1.41865	0.283285	0.164904
		1.52778	0.492002	0.742597		1.52778	1	0.965819		1.52778	0.62302	0.499883		1.52778	0.303579	0.479421		1.52778	0.729742	0.8675		1.52778	0.591856	0.49499		1.52778	0.651767	0.55631		1.52778	0.378145	0.272872		1.52778	0.32644	0.90091		1.52778	0.66205	0.142969		1.52778	0.351955	0.119074		1.52778	0.287847	0.201991
		1.6369	0.425157	0.56904		1.6369	0.95009	1		1.6369	0.807758	0.522018		1.6369	0.405452	0.47728		1.6369	0.856899	0.841874		1.6369	0.806306	0.523193		1.6369	0.87508	0.52797		1.6369	0.508342	0.269326		1.6369	0.427389	0.759914		1.6369	0.659032	0.144886		1.6369	0.367719	0.170221		1.6369	0.397526	0.244203
		1.74603	0.428931	0.587091		1.74603	0.7967	0.628		1.74603	0.899472	0.712824		1.74603	0.52258	0.566761		1.74603	0.895912	0.805004		1.74603	0.697912	0.629284		1.74603	0.998913	0.497257		1.74603	0.738777	0.231062		1.74603	0.489242	0.582661		1.74603	0.77141	0.201466		1.74603	0.332659	0.250582		1.74603	0.539808	0.301602
		1.85516	0.306517	0.358717		1.85516	0.635741	0.401477		1.85516	1	0.793127		1.85516	0.644164	0.732282		1.85516	1	0.822507		1.85516	0.77789	0.800743		1.85516	1	0.524278		1.85516	0.76926	0.1941		1.85516	0.706347	0.412671		1.85516	0.581857	0.253064		1.85516	0.399688	0.277248		1.85516	0.675786	0.380269
		1.96429	0.382738	0.460723		1.96429	0.51865	0.42641		1.96429	0.912117	0.955581		1.96429	0.794848	0.894178		1.96429	0.910611	1		1.96429	0.809348	1		1.96429	0.841831	0.469795		1.96429	0.948545	0.165216		1.96429	0.850149	0.279594		1.96429	0.57425	0.314687		1.96429	0.486711	0.246939		1.96429	0.637184	0.49957
		2.07341	0.381874	0.409082		2.07341	0.464896	0.51947		2.07341	0.698343	0.98929		2.07341	1	1		2.07341	0.880926	0.978174		2.07341	0.972016	0.753542		2.07341	0.662126	0.339377		2.07341	1	0.157699		2.07341	0.950445	0.194216		2.07341	0.600862	0.314914		2.07341	0.542457	0.213112		2.07341	0.619552	0.736869
		2.18254	0.403026	0.242695		2.18254	0.425843	0.55365		2.18254	0.546472	1		2.18254	0.997092	0.988333		2.18254	0.741085	0.899212		2.18254	1	0.748361		2.18254	0.565188	0.322411		2.18254	0.951406	0.158288		2.18254	1	0.151981		2.18254	0.594649	0.329027		2.18254	0.544936	0.228242		2.18254	0.608023	0.856187
		2.29167	0.486621	0.321681		2.29167	0.330457	0.262396		2.29167	0.48369	0.994123		2.29167	0.933446	0.912003		2.29167	0.688819	0.760463		2.29167	0.956024	0.763135		2.29167	0.529653	0.289822		2.29167	0.74941	0.108077		2.29167	0.916721	0.153678		2.29167	0.538091	0.390687		2.29167	0.503641	0.174805		2.29167	0.573903	0.963281
		2.40079	0.453483	0.333435		2.40079	0.479607	0.242456		2.40079	0.482387	0.805477		2.40079	0.858679	0.780442		2.40079	0.661029	0.542101		2.40079	0.791882	0.68274		2.40079	0.452042	0.277184		2.40079	0.615876	0.101807		2.40079	0.76688	0.164354		2.40079	0.420315	0.484135		2.40079	0.529676	0.174773		2.40079	0.550467	1
		2.50992	0.542813	0.395201		2.50992	0.416661	0.310798		2.50992	0.445767	0.771023		2.50992	0.772088	0.69294		2.50992	0.587373	0.419123		2.50992	0.63776	0.787494		2.50992	0.36749	0.234108		2.50992	0.659956	0.145467		2.50992	0.708415	0.261842		2.50992	0.478838	0.724515		2.50992	0.479142	0.156407		2.50992	0.556106	0.958203
		2.61905	0.476616	0.387696		2.61905	0.42028	0.219974		2.61905	0.427559	0.791836		2.61905	0.713384	0.593012		2.61905	0.542296	0.349221		2.61905	0.565646	0.525388		2.61905	0.348908	0.289723		2.61905	0.683863	0.139252		2.61905	0.592976	0.419469		2.61905	0.563461	0.950925		2.61905	0.473767	0.244246		2.61905	0.535362	0.805384
		2.72817	0.544291	0.299632		2.72817	0.451767	0.358134		2.72817	0.379147	0.65376		2.72817	0.680488	0.534677		2.72817	0.533661	0.327015		2.72817	0.574111	0.4164		2.72817	0.356023	0.302229		2.72817	0.700712	0.144258		2.72817	0.575082	0.522187		2.72817	0.561575	1		2.72817	0.448743	0.411259		2.72817	0.486229	0.583765
		2.8373	0.556397	0.256373		2.8373	0.482176	0.415595		2.8373	0.423686	0.771737		2.8373	0.617839	0.625309		2.8373	0.508784	0.367191		2.8373	0.504526	0.348682		2.8373	0.311398	0.32947		2.8373	0.7549	0.162367		2.8373	0.491414	0.542968		2.8373	0.538055	0.852178		2.8373	0.469278	0.589075		2.8373	0.563232	0.405041
		2.94643	0.5287	0.468998		2.94643	0.503905	0.455892		2.94643	0.464294	0.820332		2.94643	0.613837	0.475916		2.94643	0.546178	0.352671		2.94643	0.590206	0.617044		2.94643	0.321551	0.444082		2.94643	0.897767	0.230557		2.94643	0.517739	0.508609		2.94643	0.524211	0.6071		2.94643	0.476039	0.725461		2.94643	0.473494	0.301866
		3.05556	0.651928	0.515571		3.05556	0.522777	0.639353		3.05556	0.485323	0.814079		3.05556	0.542428	0.47357		3.05556	0.557899	0.181743		3.05556	0.526719	0.419513		3.05556	0.298844	0.546398		3.05556	0.948221	0.247044		3.05556	0.590126	0.39747		3.05556	0.603856	0.387577		3.05556	0.48443	0.681423		3.05556	0.551618	0.254562
		3.16468	0.726592	0.437965		3.16468	0.417901	0.57934		3.16468	0.52854	0.929934		3.16468	0.496482	0.482056		3.16468	0.564753	0.223443		3.16468	0.470957	0.49991		3.16468	0.305519	0.536519		3.16468	0.813297	0.364232		3.16468	0.530446	0.275979		3.16468	0.668872	0.227847		3.16468	0.398922	0.506879		3.16468	0.525379	0.225582
		3.27381	0.788964	0.483089		3.27381	0.516872	0.57559		3.27381	0.546783	0.831543		3.27381	0.457691	0.420711		3.27381	0.522687	0.14087		3.27381	0.512376	0.292892		3.27381	0.305155	0.520751		3.27381	0.767442	0.488354		3.27381	0.459633	0.204581		3.27381	0.639972	0.166072		3.27381	0.374875	0.355999		3.27381	0.542177	0.222524
		3.38294	0.829152	0.606504		3.38294	0.388987	0.500533		3.38294	0.541703	0.898199		3.38294	0.401175	0.341524		3.38294	0.515947	0.146328		3.38294	0.517316	0.483149		3.38294	0.309976	0.384809		3.38294	0.698308	0.66229		3.38294	0.428211	0.132517		3.38294	0.661995	0.167167		3.38294	0.344515	0.26027		3.38294	0.511877	0.196164
		3.49206	0.731679	0.65833		3.49206	0.471445	0.516272		3.49206	0.531525	0.841977		3.49206	0.368424	0.352619		3.49206	0.476052	0.182668		3.49206	0.478573	0.366252		3.49206	0.412594	0.428049		3.49206	0.626411	0.758535		3.49206	0.523544	0.133122		3.49206	0.702536	0.141995		3.49206	0.361746	0.236836		3.49206	0.574074	0.18718
		3.60119	0.721509	0.587287		3.60119	0.429178	0.56793		3.60119	0.503358	0.744272		3.60119	0.3406	0.351075		3.60119	0.467682	0.12092		3.60119	0.361295	0.348439		3.60119	0.446775	0.455959		3.60119	0.640308	0.812785		3.60119	0.435187	0.141814		3.60119	0.674105	0.131664		3.60119	0.383422	0.371797		3.60119	0.71152	0.17134
		3.71032	0.715848	0.650012		3.71032	0.447894	0.557284		3.71032	0.451834	0.648532		3.71032	0.333556	0.2662		3.71032	0.457049	0.0404873		3.71032	0.417291	0.455235		3.71032	0.485474	0.405786		3.71032	0.70353	0.826123		3.71032	0.517002	0.125638		3.71032	0.674172	0.111398		3.71032	0.355781	0.476316		3.71032	0.703297	0.203833
		3.81944	0.608586	0.63855		3.81944	0.337319	0.484685		3.81944	0.423928	0.723957		3.81944	0.271749	0.257808		3.81944	0.452891	0.13192		3.81944	0.39479	0.499816		3.81944	0.536832	0.49335		3.81944	0.608306	0.877081		3.81944	0.558644	0.13931		3.81944	0.703948	0.115638		3.81944	0.397042	0.64628		3.81944	0.674635	0.151205
		3.92857	0.464321	0.635104		3.92857	0.286983	0.564552		3.92857	0.327254	0.59173		3.92857	0.183739	0.29518		3.92857	0.341949	0.100734		3.92857	0.439008	0.203595		3.92857	0.557098	0.66505		3.92857	0.584027	0.847186		3.92857	0.570144	0.129765		3.92857	0.878299	0.150357		3.92857	0.424626	0.805274		3.92857	0.729578	0.137372
		4.0377	0.41327	0.468966		4.0377	0.218714	0.406694		4.0377	0.21669	0.698664		4.0377	0.162463	0.231301		4.0377	0.368942	0.0224706		4.0377	0.380879	0.339996		4.0377	0.515205	0.767437		4.0377	0.642363	0.869542		4.0377	0.6195	0.121274		4.0377	1	0.1257		4.0377	0.481181	0.959926		4.0377	0.756529	0.163978
		4.14683	0.216457	0.513943		4.14683	0.146219	0.26675		4.14683	0.162	0.553689		4.14683	0.159335	0.173956		4.14683	0.244162	0.00201184		4.14683	0.363501	0.444771		4.14683	0.443767	0.979354		4.14683	0.733171	0.916647		4.14683	0.648635	0.118005		4.14683	0.978677	0.141912		4.14683	0.54117	1		4.14683	0.818933	0.121593
		4.25595	0.23375	0.385803		4.25595	0.093955	0.304548		4.25595	0.216682	0.579624		4.25595	0.120718	0.145155		4.25595	0.174534	0		4.25595	0.325	0.434219		4.25595	0.392365	1		4.25595	0.767473	1		4.25595	0.679649	0.112777		4.25595	0.921828	0.158722		4.25595	0.67303	0.92845		4.25595	0.888226	0.0974527
		4.36508	0.193733	0.299176		4.36508	0.096104	0.230635		4.36508	0.138212	0.429181		4.36508	0.0759308	0.114811		4.36508	0.136723	0.129836		4.36508	0.290456	0.436251		4.36508	0.27979	0.848704		4.36508	0.784028	0.954123		4.36508	0.690591	0.0903077		4.36508	0.779808	0.179753		4.36508	0.772214	0.748163		4.36508	0.890966	0.133012
		4.47421	0.123163	0.194862		4.47421	0.0450605	0.163155		4.47421	0.143453	0.319293		4.47421	0.0362623	0.133931		4.47421	0.195594	0.0653648		4.47421	0.231667	0.379135		4.47421	0.203128	0.721933		4.47421	0.656339	0.846724		4.47421	0.719831	0.0569316		4.47421	0.633078	0.18344		4.47421	0.830056	0.625752		4.47421	0.977264	0.164696
		4.58333	0.0127801	0.144653						4.58333	0.136825	0.24295		4.58333	0.0353015	0.190126		4.58333	0.0783665	0.0395962		4.58333	0.0939555	0.485372		4.58333	0.100234	0.589495		4.58333	0.597259	0.819818		4.58333	0.572451	0.093561		4.58333	0.543191	0.194021		4.58333	0.906118	0.39377		4.58333	1	0.193504
		4.69246	0.122509	0.0627521						4.69246	0.146266	0.180829		4.69246	0	0.0902144		4.69246	0.178232	0.0875559		4.69246	0.113628	0.34028		4.69246	0.0919374	0.476031		4.69246	0.546316	0.744636		4.69246	0.463909	0.068884		4.69246	0.352628	0.256947		4.69246	0.991363	0.252703		4.69246	0.931347	0.212835
																						4.80159	0.104129	0.203173		4.80159	0.103887	0.340006		4.80159	0.393616	0.673254		4.80159	0.256959	0.0533441		4.80159	0.251276	0.400909		4.80159	1	0.191944		4.80159	0.647142	0.259113
																						4.91071	0.16022	0.205533		4.91071	0.0720359	0.209152		4.91071	0.250066	0.500614		4.91071	0.211694	0.023358		4.91071	0.140566	0.547724		4.91071	0.838198	0.0799825		4.91071	0.449552	0.266687
																						5.01984	0	0.15968		5.01984	0.0401745	0.153068		5.01984	0.163675	0.322577		5.01984	0.147888	0.0207806		5.01984	0.0820853	0.645669		5.01984	0.653493	0.116506		5.01984	0.246498	0.243377
																										5.12897	0.00343735	0.0399572		5.12897	0.180359	0.207234		5.12897	0.0975853	0.0378193		5.12897	0	0.611919		5.12897	0.339308	0.0630087		5.12897	0.287165	0.191782
																																														5.2381	0.147014	0.153117
[truncated: 27 more columns]
