# Supplementary material for: A novel live-cell imaging assay reveals regulation of endosome maturation
Source: eLife. 2021 Nov 30;10:e70982. doi: 10.7554/eLife.70982 (PMC8635980; doi:10.7554/eLife.70982)
Supplement: Figure 6—figure supplement 1—source data 2. [file elife-70982-fig6-figsupp1-data2.xlsx]

## Sheet: exp1 endosome1
frame #	21				22				23				24				25				26				27				28				29				30				31				32				33
line profiles		Rab7	Snx1			Rab7	Snx1			Rab7	Snx1			Rab7	Snx1			Rab7	Snx1			Rab7	Snx1			Rab7	Snx1			Rab7	Snx1			Rab7	Snx1			Rab7	Snx1			Rab7	Snx1			Rab7	Snx1
	0	554.515	292.763		0	617.273	313.983		0	583.382	332.491		0	563.556	331.012		0	587.363	312.682		0	632.327	321.163		0	788.917	326.654		0	518.108	298.973		0	701.468	307.199		0	664.259	320.081		0	632.004	291.396		0	512.651	297.543		0
	0.10913	548.07	305.519		0.10913	610.648	315.791		0.10913	588.425	335.908		0.10913	558.02	333.704		0.10913	570.509	313.033		0.10913	635.757	304.278		0.10913	836.837	324.231		0.10913	514.683	296.318		0.10913	716.363	310.777		0.10913	683.4	325.511		0.10913	648.406	281.047		0.10913	517.356	303.541		0.10913
	0.21825	531.756	304.255		0.21825	585.643	312.478		0.21825	566.6	323.706		0.21825	572.085	333.832		0.21825	566.051	324.608		0.21825	629.6	307.509		0.21825	817.983	329.869		0.21825	514.185	290.743		0.21825	707.3	321.981		0.21825	680.12	318.889		0.21825	651.878	288.027		0.21825	500.266	306.808		0.21825
	0.32738	517.305	305.409		0.32738	575.639	323.082		0.32738	561.82	325.079		0.32738	585.426	336.091		0.32738	583.041	323.214		0.32738	642.498	309.88		0.32738	780.109	319.683		0.32738	509.044	291.292		0.32738	756.9	330.737		0.32738	694.857	314.173		0.32738	657.843	284.803		0.32738	495.73	314.14		0.32738
	0.43651	501.597	303.366		0.43651	564.257	316.616		0.43651	540.822	321.591		0.43651	593.671	336.302		0.43651	592.913	330.032		0.43651	660.975	308.867		0.43651	737.598	321.877		0.43651	520.878	293.871		0.43651	815.173	328.054		0.43651	723.65	318.808		0.43651	666.89	284.069		0.43651	486.381	323.269		0.43651
	0.54563	488.586	306.331		0.54563	556.287	315.86		0.54563	543.298	320.678		0.54563	603.98	335.512		0.54563	600.902	350.131		0.54563	672.973	299.913		0.54563	706.518	324.969		0.54563	550.597	310.479		0.54563	834.589	335.371		0.54563	743.409	330.589		0.54563	673.93	299.042		0.54563	492.312	327.098		0.54563
	0.65476	473.826	309.616		0.65476	543.82	315.554		0.65476	523.989	323.294		0.65476	608.918	333.243		0.65476	619.605	339.723		0.65476	686.399	300.059		0.65476	682.312	330.673		0.65476	579.585	307.657		0.65476	851.641	334.553		0.65476	748.38	322.732		0.65476	662.275	304.711		0.65476	518.778	336.303		0.65476
	0.76389	449.505	319.366		0.76389	511.433	317.628		0.76389	528.949	319.135		0.76389	638.986	333.741		0.76389	649.833	341.362		0.76389	699.545	303.614		0.76389	659.022	327.634		0.76389	610.171	307.03		0.76389	889.567	343.756		0.76389	773.065	329.628		0.76389	701.264	295.826		0.76389	546.152	331.317		0.76389
	0.87302	445.038	318.068		0.87302	516.073	311.419		0.87302	546.689	333.234		0.87302	712.233	352.895		0.87302	660.923	341.674		0.87302	728.42	305.404		0.87302	654.226	318.818		0.87302	687.429	312.367		0.87302	865.077	343.331		0.87302	807.78	334.478		0.87302	732.962	301.56		0.87302	566.821	316.751		0.87302
	0.98214	440.429	317.211		0.98214	500.719	323.829		0.98214	592.239	326.611		0.98214	803.452	364.953		0.98214	696.877	334.01		0.98214	714.276	311.151		0.98214	653.19	327.804		0.98214	733.066	322.362		0.98214	828.316	324.936		0.98214	837.927	330.616		0.98214	754.716	308.361		0.98214	597.5	322.953		0.98214
	1.09127	436.76	318.583		1.09127	494.198	326.13		1.09127	628.969	334.372		1.09127	914.61	389.841		1.09127	703.067	329.925		1.09127	703.693	308.723		1.09127	657.918	314.007		1.09127	756.616	334.627		1.09127	818.467	328.275		1.09127	847.286	351.114		1.09127	766.596	324.183		1.09127	625.416	322.372		1.09127
	1.2004	459.05	328.055		1.2004	507.955	331.629		1.2004	625.886	342.393		1.2004	958.072	399.001		1.2004	694.18	334.802		1.2004	724.446	308.872		1.2004	669.406	312.158		1.2004	795.172	333.793		1.2004	788.998	332.863		1.2004	836.868	344.186		1.2004	819.682	320.603		1.2004	660.691	326.713		1.2004
	1.30952	477.395	327.332		1.30952	505.947	326.202		1.30952	597.176	347.256		1.30952	918.765	405.448		1.30952	697.243	331.103		1.30952	752.236	316.142		1.30952	679.157	308.153		1.30952	791.208	347.82		1.30952	777.393	326.077		1.30952	844.209	352.898		1.30952	832.866	329.128		1.30952	692.721	317.739		1.30952
	1.41865	504.96	335.899		1.41865	524.402	317.141		1.41865	595.553	344.398		1.41865	872.01	406.807		1.41865	711.786	331.076		1.41865	781.917	327.632		1.41865	627.794	309.543		1.41865	785.889	341.354		1.41865	786.901	327.929		1.41865	880.994	352.237		1.41865	861.276	344.277		1.41865	705.105	316.665		1.41865
	1.52778	540.252	339.792		1.52778	546.422	335.518		1.52778	590.612	349.619		1.52778	819.486	401.515		1.52778	751.335	338.371		1.52778	790.088	321.8		1.52778	621.157	310.354		1.52778	752.323	340		1.52778	801.034	332.672		1.52778	907.858	343.089		1.52778	913.758	350.12		1.52778	739.814	332.237		1.52778
	1.6369	576.484	354.137		1.6369	576.517	337.952		1.6369	588.322	344.352		1.6369	755.234	398.693		1.6369	788.074	336.2		1.6369	820.753	322.553		1.6369	584.125	320.735		1.6369	714.203	334.117		1.6369	829.718	339.474		1.6369	911.026	350.298		1.6369	967.15	352.094		1.6369	785.974	343.031		1.6369
	1.74603	609.538	370.648		1.74603	590.908	328.28		1.74603	609.135	340.48		1.74603	733.566	378.013		1.74603	829.457	343.02		1.74603	821.423	332.289		1.74603	568.29	313.175		1.74603	702.488	334.381		1.74603	847.514	331.333		1.74603	897.478	354.099		1.74603	1035.33	353.611		1.74603	839.1	339.809		1.74603
	1.85516	621.19	381.902		1.85516	602.719	336.82		1.85516	653.757	349.407		1.85516	740.549	361.963		1.85516	886.664	338.278		1.85516	883.124	334.172		1.85516	566.291	319.87		1.85516	704.456	330.159		1.85516	871.096	325.68		1.85516	894.197	345.876		1.85516	1047.35	347.835		1.85516	891.267	327.666		1.85516
	1.96429	639.413	390.984		1.96429	614.174	346.466		1.96429	692.704	353.401		1.96429	724.313	373.953		1.96429	925.594	346.8		1.96429	887.182	344.577		1.96429	568.382	326.863		1.96429	692.585	325.549		1.96429	913.283	333.57		1.96429	887.454	339.098		1.96429	1021.42	335.092		1.96429	914.858	316.737		1.96429
	2.07341	643.831	385.147		2.07341	626.89	345.043		2.07341	728.895	366.809		2.07341	763.48	360.002		2.07341	950.702	360.974		2.07341	935.041	328.775		2.07341	596.929	337.011		2.07341	690.786	330.897		2.07341	981.365	347.768		2.07341	874.937	342.434		2.07341	966.543	321.702		2.07341	887.942	315.984		2.07341
	2.18254	637.08	369.716		2.18254	650.498	348.106		2.18254	774.293	374.821		2.18254	813.124	353.39		2.18254	975.498	360.027		2.18254	949.17	338.801		2.18254	648.453	345.284		2.18254	705.074	331.388		2.18254	1038.26	347.428		2.18254	878.853	341.519		2.18254	918.59	322.864		2.18254	845.514	306.418		2.18254
	2.29167	636.44	364.076		2.29167	675.949	346.509		2.29167	779.812	380.183		2.29167	870.604	366.084		2.29167	959.016	364.936		2.29167	993.553	341.778		2.29167	662.507	341.772		2.29167	715.851	333.75		2.29167	1095.6	385.578		2.29167	904.795	339.489		2.29167	892.7	323.151		2.29167	774.429	310.454		2.29167
	2.40079	635.598	358.621		2.40079	698.189	350.538		2.40079	780.886	387.165		2.40079	879.652	380.394		2.40079	912.05	358.661		2.40079	1008.2	346.778		2.40079	698.846	325.634		2.40079	755.294	335.431		2.40079	1144.71	394.096		2.40079	937.408	346.792		2.40079	839.885	327.078		2.40079	722.354	323.641		2.40079
	2.50992	644.831	346.028		2.50992	728.775	351.692		2.50992	783.198	374.892		2.50992	850.177	392.178		2.50992	873.694	344.361		2.50992	997.906	349.082		2.50992	715.62	308.551		2.50992	783.841	347.496		2.50992	1165.5	398.176		2.50992	970.944	339.522		2.50992	835.679	326.179		2.50992	725.86	328.558		2.50992
	2.61905	637.362	339.384		2.61905	733.057	342.844		2.61905	793.98	362.989		2.61905	834.057	384.13		2.61905	862.005	335.334		2.61905	1004.75	347.778		2.61905	737.592	309.06		2.61905	766.285	338.361		2.61905	1145.94	405.709		2.61905	1031.68	346.505		2.61905	835.705	333.469		2.61905	716.326	325.8		2.61905
	2.72817	640.241	332.395		2.72817	714.613	339.708		2.72817	782.085	370.679		2.72817	855.071	384.047		2.72817	863.875	332.176		2.72817	1038.92	356.732		2.72817	758.187	320.818		2.72817	797.104	330.959		2.72817	1105.3	388.334		2.72817	1074.96	361.691		2.72817	841.7	320.066		2.72817	723.247	337.158		2.72817
	2.8373	646.075	339.111		2.8373	715.399	346.7		2.8373	755.014	361.739		2.8373	892.868	372.984		2.8373	908.55	336.68		2.8373	1036.69	339.947		2.8373	753.92	306.172		2.8373	804.26	324.643		2.8373	1097.15	391.105		2.8373	1122.37	364.833		2.8373	885.85	350.629		2.8373	748.92	342.864		2.8373
	2.94643	630.519	352.172		2.94643	725.578	343.832		2.94643	747.934	357.219		2.94643	920.508	366.798		2.94643	955.848	339.51		2.94643	994.044	338.673		2.94643	720.804	303.082		2.94643	776.656	325.644		2.94643	1078.53	365.575		2.94643	1179.59	376.173		2.94643	957.927	362.043		2.94643	757.783	350.875		2.94643
	3.05556	638.562	350.289		3.05556	704.557	340.702		3.05556	735.438	342.965		3.05556	924.147	357.08		3.05556	980.413	336.367		3.05556	975.709	339.571		3.05556	698.985	312.004		3.05556	748.131	313.906		3.05556	1036.91	360.959		3.05556	1188.83	391.501		3.05556	1061.96	386.708		3.05556	754.758	365.755		3.05556
	3.16468	620.189	333.899		3.16468	697.825	348.204		3.16468	724.438	339.231		3.16468	900.426	357.639		3.16468	972.636	335.28		3.16468	972.231	333.406		3.16468	652.752	315.005		3.16468	699.062	327.261		3.16468	1000.74	349.411		3.16468	1183.57	389.842		3.16468	1207.42	408.753		3.16468	754.567	368.518		3.16468
	3.27381	610.394	361.14		3.27381	690.292	344.212		3.27381	730.429	338.129		3.27381	882.319	357.73		3.27381	955.718	337.246		3.27381	961.802	329.735		3.27381	623.399	318.629		3.27381	703.415	327.517		3.27381	967.792	334.975		3.27381	1114.64	383.724		3.27381	1307.61	403.153		3.27381	760.368	366.729		3.27381
	3.38294	607.689	347.725		3.38294	680.344	343.74		3.38294	735.031	338.106		3.38294	856.195	346.79		3.38294	893.514	346.286		3.38294	958.142	330.301		3.38294	596.048	323.129		3.38294	685.975	312.983		3.38294	928.165	337.517		3.38294	1014.89	369.766		3.38294	1350.64	398.527		3.38294	806.072	371.296		3.38294
	3.49206	616.53	352.371		3.49206	674.448	355.05		3.49206	722.432	334.643		3.49206	848.13	344.019		3.49206	848.551	347.761		3.49206	968.259	326.23		3.49206	594.874	329.808		3.49206	656.311	325.949		3.49206	915.997	341.004		3.49206	971.138	351.67		3.49206	1276.19	375.267		3.49206	863.893	373.397		3.49206
	3.60119	611.754	352.746		3.60119	653.765	343.752		3.60119	699.32	336.989		3.60119	864.076	351.207		3.60119	844.791	370.479		3.60119	975.059	321.932		3.60119	607.771	320.986		3.60119	664.705	317.551		3.60119	921.468	336.019		3.60119	918.316	338.51		3.60119	1184.12	360.326		3.60119	933.407	356.987		3.60119
	3.71032	608.94	340.8		3.71032	656.282	336.54		3.71032	665.633	337.222		3.71032	863.475	356.544		3.71032	849.892	368.319		3.71032	967.244	322.252		3.71032	605.662	333.329		3.71032	655.859	315.898		3.71032	936.385	343.108		3.71032	901.946	338.657		3.71032	1106.89	342.896		3.71032	984.571	347.42		3.71032
	3.81944	626.131	357.323		3.81944	654.467	339.361		3.81944	692.811	331.845		3.81944	855.198	358.711		3.81944	820.629	376.596		3.81944	943.119	315.993		3.81944	636.847	324.396		3.81944	655.426	319.658		3.81944	963.571	349.575		3.81944	869.82	330.247		3.81944	1050.55	353.642		3.81944	1008.36	339.69		3.81944
	3.92857	636.004	339.394		3.92857	633.393	341.137		3.92857	712.69	319.26		3.92857	823.337	354.154		3.92857	821.078	367.783		3.92857	951.304	323.194		3.92857	674.603	335.873		3.92857	679.515	330.481		3.92857	977.452	351.415		3.92857	870.847	329.38		3.92857	953.585	354.766		3.92857	979.127	336.279		3.92857
	4.0377	659.504	341.333		4.0377	618.161	336.819		4.0377	721.431	320.937		4.0377	810.952	347.158		4.0377	826.79	374.614		4.0377	946.937	310.534		4.0377	697.816	331.744		4.0377	678.499	345.64		4.0377	953.39	363.661		4.0377	866.093	336.383		4.0377	887.752	355.334		4.0377	943.738	343.331		4.0377
	4.14683	655.823	330.609		4.14683	604.428	325.558		4.14683	716.873	324.609		4.14683	754.364	335.505		4.14683	817.976	364.539		4.14683	938.993	303.427		4.14683	680.435	318.25		4.14683	697.53	350.649		4.14683	956.062	369.347		4.14683	822.937	334.938		4.14683	840.965	351.854		4.14683	885.402	348.652		4.14683
	4.25595	633.106	326.051		4.25595	616.638	331.688		4.25595	708.046	341.257		4.25595	742.899	338.063		4.25595	802.093	370.132		4.25595	869.009	302.684		4.25595	656.72	307.73		4.25595	687.786	344.943		4.25595	943.843	372.609		4.25595	796.218	335.419		4.25595	797.478	351.372		4.25595	818.297	338.432		4.25595
	4.36508	610.384	325.997		4.36508	616.357	323.531		4.36508	674.142	327.216		4.36508	711.081	331.029		4.36508	791.475	386.832		4.36508	845.654	292.493		4.36508	680.875	301.549		4.36508	649.118	325.003		4.36508	946.254	368.386		4.36508	787.108	341.29		4.36508	786.066	333.37		4.36508	791.318	340.371		4.36508
	4.47421	603.801	335.244		4.47421	640.09	315.652		4.47421	632.347	313.917		4.47421	684.253	337.557		4.47421	775.048	382.215		4.47421	810.918	298.868		4.47421	697.489	308.856		4.47421	643.977	327.002		4.47421	917.618	359.514		4.47421	804.461	351.058		4.47421	798.175	329.987		4.47421	812.029	347.51		4.47421
	4.58333	589.356	326.877		4.58333	639.999	313.192		4.58333	635.558	310.978		4.58333	638.917	341.813		4.58333	754.441	371.596		4.58333	808.229	303.844		4.58333	678.92	307.513		4.58333	636.786	306.635		4.58333	852.498	357.058		4.58333	834.974	348.591		4.58333	824.922	323.995		4.58333	839.989	344.506		4.58333
	4.69246	576.47	332.563		4.69246	641.674	311.33		4.69246	628.206	317.985		4.69246	625.173	325.953		4.69246	721.513	362.695		4.69246	792.649	303.748		4.69246	641.999	299.927		4.69246	631.774	300.833		4.69246	784.842	341.494		4.69246	877.299	359.435		4.69246	840.248	318.862		4.69246	858.357	338.622		4.69246
	4.80159	597.742	329.272		4.80159	646.208	321.118		4.80159	624.95	310.922		4.80159	622.851	327.697		4.80159	707.925	332.319		4.80159	755.511	290.298		4.80159	620.236	299.105		4.80159	614.516	304.837		4.80159	736.357	339.506		4.80159	933.304	365.54		4.80159	828.203	323.552		4.80159	836.294	342.673		4.80159
	4.91071	582.033	318.486		4.91071	653.462	318.175		4.91071	645.231	309.477		4.91071	630.021	327.722		4.91071	684.876	336.544		4.91071	711.935	301.569		4.91071	608.597	303.06		4.91071	590.336	298.373		4.91071	710.179	335.042		4.91071	977.118	384.724		4.91071	792.474	319.542		4.91071	809.449	329.654		4.91071
	5.01984	616.964	312.052		5.01984	647.866	323.152		5.01984	652.471	315.998		5.01984	656.339	323.582		5.01984	658.959	330.203		5.01984	671.299	298.781		5.01984	602.639	304.621		5.01984	575.066	290.591		5.01984	672.838	322.749		5.01984	1014.97	405.356		5.01984	757.202	305.673		5.01984	784.212	324.447		5.01984
	5.12897	630.203	309.554		5.12897	661.095	317.361		5.12897	639.889	317.856		5.12897	674.369	334.873		5.12897	643.468	321.628		5.12897	667.139	311.122		5.12897	610.677	294.563		5.12897	560.884	284.829		5.12897	655.537	319.163		5.12897	1012.1	407.898		5.12897	728.053	312.483		5.12897	781.296	324.056		5.12897
	5.2381	617.245	315.106		5.2381	680.708	317.474		5.2381	656.226	317.311		5.2381	670.276	336.694		5.2381	608.149	317.136		5.2381	675.758	302.328		5.2381	595.953	294.549		5.2381	565.681	290.536		5.2381	650.468	317.974		5.2381	1008.71	410.213		5.2381	702.38	321.255		5.2381	780.769	311.369		5.2381
	5.34722	612.53	319.857		5.34722	700.567	329.239		5.34722	684.897	316.998		5.34722	683.6	339.864		5.34722	609.296	316.652		5.34722	682.757	305.134		5.34722	568.32	284.692		5.34722	569.763	290.797		5.34722	650.461	313.054		5.34722	1015.43	400.862		5.34722	673.649	316.649		5.34722	760.858	309.299		5.34722
	5.45635	573.855	315.451		5.45635	696.96	321.862		5.45635	720.37	316.984		5.45635	678.297	336.409		5.45635	614.117	313.88		5.45635	700.131	315.376		5.45635	537.572	282.788		5.45635	600.31	287.995		5.45635	670.512	311.274		5.45635	1014.01	390.036		5.45635	657.479	313.278		5.45635	738.659	311.059		5.45635
	5.56548	563.167	313.976		5.56548	688.39	323.838		5.56548	758.022	324.99		5.56548	649.317	336.018		5.56548	612.286	310.239		5.56548	721.172	321.389		5.56548	512.64	290.796		5.56548	584.306	289.082		5.56548	672.346	312.07		5.56548	975.659	357.314		5.56548	648.894	310.639		5.56548	711.322	314.164		5.56548
	5.6746	535.561	308.575		5.6746	677.146	319.239		5.6746	759.513	320.591		5.6746	619.233	328.639		5.6746	605.538	310.995		5.6746	716.809	331.734		5.6746	507.391	302.985		5.6746	567.941	281.792		5.6746	662.684	308.036		5.6746	894.352	350.116		5.6746	614.448	298.933		5.6746	678.409	314.827		5.6746
	5.78373	533.403	290.94		5.78373	658.61	317.325		5.78373	730.195	330.906		5.78373	584.156	333.443		5.78373	593.183	311.29		5.78373	699.379	328.075		5.78373	501.947	300.811		5.78373	577.457	285.335		5.78373	665.61	301.638		5.78373	819.381	338.582		5.78373	604.52	302.712		5.78373	636.161	310.325		5.78373
	5.89286	528.008	296.848		5.89286	651.898	321.411		5.89286	704.446	330.286		5.89286	555.013	337.121		5.89286	581.925	307.283		5.89286	706.068	317.552		5.89286	504.944	304.439		5.89286	581.393	281.557		5.89286	666.858	304.232		5.89286	770.411	334.953		5.89286	606.773	301.799		5.89286	603.726	306.188		5.89286
	6.00198	524.51	308.357		6.00198	642.02	324.274		6.00198	659.251	319.752		6.00198	540.431	343.565		6.00198	577.872	312.483		6.00198	699.145	330.45		6.00198	505.659	302.24		6.00198	555.705	281.088		6.00198	658.965	303.569		6.00198	735.737	324.249		6.00198	611.482	297.491		6.00198	599.797	305.213		6.00198
	6.11111	550.422	295.383		6.11111	633.995	309.572		6.11111	618.036	318.608		6.11111	545.199	326.23						6.11111	665.304	314.404		6.11111	523.046	304.853		6.11111	544.906	289.997		6.11111	665.207	307.313		6.11111	712.249	314.576		6.11111	626.279	289.125		6.11111	618.648	301.553		6.11111
					6.22024	618.638	317.624		6.22024	598.352	331.723		6.22024	517.349	337.629						6.22024	667.13	320.965		6.22024	539.03	293.301		6.22024	525.604	285.25		6.22024	656.16	319.563		6.22024	705.554	315.367		6.22024	627.25	292.494		6.22024	633.186	290.721		6.22024
					6.32937	610.91	315.72		6.32937	579.904	327.318		6.32937	549.006	328.8						6.32937	645.555	317.854		6.32937	549.694	300.389		6.32937	515.105	295.726		6.32937	644.278	306.515		6.32937	735.147	312.659		6.32937	632.227	291.754		6.32937	623.938	298.774		6.32937
					6.43849	611.231	311.611		6.43849	574.938	322.818		6.43849	554.913	327.609						6.43849	630.456	318.229		6.43849	591.253	302.083						6.43849	658.552	300.13		6.43849	736.943	311.91		6.43849	639.146	296.977		6.43849	626.403	297.995		6.43849
									6.54762	576.513	332.732														6.54762	663.434	305.539						6.54762	694.214	304.316		6.54762	730.846	314.909		6.54762	627.537	290.937		6.54762	605.741	301.836		6.54762
																									6.65675	759.221	321.85										6.65675	697.213	317.337		6.65675	628.995	282.148		6.65675	577.304	297.524		6.65675
																																					6.76587	660.121	312.829		6.76587	632.8	285.557		6.76587	549.699	302.805		6.76587
																																					6.875	643.46	314.636		6.875	611.593	283.309		6.875	531.129	291.204		6.875
																																					6.98413	655.794	326.804		6.98413	627.837	284.306		6.98413	504.577	286.701		6.98413
																																					7.09325	662.195	320.687		7.09325	627.234	288.041		7.09325	508.367	295.456
MIN		436.76	290.94			494.198	309.572			523.989	309.477			517.349	323.582			566.051	307.283			629.6	290.298			501.947	282.788			509.044	281.088			644.278	300.13			643.46	311.91			604.52	281.047			486.381	286.701
MAX		659.504	390.984			733.057	355.05			793.98	387.165			958.072	406.807			980.413	386.832			1038.92	356.732			836.837	345.284			804.26	350.649			1165.5	405.709			1188.83	410.213			1350.64	408.753			1008.36	373.397
TOTAL MIN		436.76	260.947
TOTAL MAX		1350.64	410.213
both Rab7 and Snx1 normalised for individual min-max
	0	0.528656	0.018222		0	0.515262	0.0970095		0	0.219981	0.296238		0	0.104844	0.0892728		0	0.0514333	0.0678733		0	0.0066622	0.464597		0	0.856908	0.70191		0	0.0307029	0.257108		0	0.109723	0.0669546		0	0.0381376	0.0831149		0	0.0368359	0.0810377		0	0.0503279	0.125051		0
	0.10913	0.499722	0.145726		0.10913	0.487526	0.136765		0.10913	0.23866	0.340219		0.10913	0.0922825	0.12162		0.10913	0.0107587	0.0722806		0.10913	0.0150419	0.210446		0.10913	1	0.663138		0.10913	0.0191013	0.218949		0.10913	0.138301	0.100844		0.10913	0.073235	0.138359		0.10913	0.058819	0		0.10913	0.0593417	0.194233		0.10913
	0.21825	0.426481	0.133091		0.21825	0.382841	0.0639078		0.21825	0.157824	0.183162		0.21825	0.124196	0.123163		0.21825	0	0.21779		0.21825	0	0.259079		0.21825	0.943701	0.753347		0.21825	0.0174144	0.1388		0.21825	0.120912	0.206964		0.21825	0.0672207	0.0709911		0.21825	0.0634724	0.0546568		0.21825	0.0266008	0.231929		0.21825
	0.32738	0.361603	0.144626		0.32738	0.340958	0.297084		0.32738	0.140119	0.200829		0.32738	0.154467	0.1503		0.32738	0.0410028	0.200275		0.32738	0.0315105	0.294757		0.32738	0.830607	0.590362		0.32738	0	0.146686		0.32738	0.216074	0.289897		0.32738	0.0942428	0.0230157		0.32738	0.0714671	0.0294113		0.32738	0.0179108	0.3165		0.32738
	0.43651	0.291083	0.124205		0.43651	0.293307	0.154897		0.43651	0.0623465	0.155929		0.43651	0.173175	0.15284		0.43651	0.0648274	0.285978		0.43651	0.0766508	0.279515		0.43651	0.703667	0.625462		0.43651	0.0400859	0.183765		0.43651	0.327875	0.264484		0.43651	0.147038	0.070164		0.43651	0.0835925	0.0236637		0.43651	0	0.421794		0.43651
	0.54563	0.232671	0.153842		0.54563	0.25994	0.138273		0.54563	0.0715172	0.144189		0.54563	0.196566	0.143341		0.54563	0.0841076	0.538636		0.54563	0.105963	0.144731		0.54563	0.61086	0.674939		0.54563	0.140755	0.422518		0.54563	0.365126	0.333788		0.54563	0.183269	0.190014		0.54563	0.0930279	0.14091		0.54563	0.0113626	0.465958		0.54563
	0.65476	0.166406	0.186678		0.65476	0.207746	0.131545		0.65476	0	0.177857		0.65476	0.20777	0.116086		0.65476	0.129244	0.407799		0.65476	0.138763	0.146935		0.65476	0.53858	0.766205		0.65476	0.238947	0.381944		0.65476	0.397842	0.32604		0.65476	0.192384	0.110083		0.65476	0.0774071	0.185301		0.65476	0.062066	0.572134		0.65476
	0.76389	0.0572182	0.284135		0.76389	0.0721555	0.177141		0.76389	0.018371	0.124327		0.76389	0.275994	0.122071		0.76389	0.202195	0.428403		0.76389	0.170879	0.20044		0.76389	0.469035	0.71758		0.76389	0.342553	0.372932		0.76389	0.470606	0.413207		0.76389	0.237647	0.180241		0.76389	0.129663	0.115727		0.76389	0.114509	0.514622		0.76389
	0.87302	0.0371637	0.271161		0.87302	0.0915812	0.0406152		0.87302	0.0840769	0.305806		0.87302	0.442192	0.352218		0.87302	0.228959	0.432322		0.87302	0.241422	0.227395		0.87302	0.454713	0.576527		0.87302	0.604252	0.449662		0.87302	0.42362	0.409182		0.87302	0.301301	0.229571		0.87302	0.172147	0.160627		0.87302	0.154106	0.346611		0.87302
	0.98214	0.0164718	0.262594		0.98214	0.0273006	0.313508		0.98214	0.252786	0.220545		0.98214	0.649167	0.497094		0.98214	0.315729	0.335987		0.98214	0.206868	0.313891		0.98214	0.45162	0.7203		0.98214	0.758841	0.593344		0.98214	0.353091	0.234952		0.98214	0.356579	0.190286		0.98214	0.201303	0.213882		0.98214	0.212881	0.418155		0.98214
	1.09127	0	0.276308		1.09127	0	0.364104		1.09127	0.388828	0.32045		1.09127	0.901385	0.796148		1.09127	0.330667	0.284631		1.09127	0.181013	0.277349		1.09127	0.465738	0.499542		1.09127	0.838613	0.769669		1.09127	0.334195	0.266578		1.09127	0.37374	0.398806		1.09127	0.217225	0.337776		1.09127	0.266362	0.411443		1.09127
	1.2004	0.10007	0.370987		1.2004	0.0575946	0.485019		1.2004	0.377409	0.423698		1.2004	1	0.906208		1.2004	0.30922	0.345941		1.2004	0.231714	0.279595		1.2004	0.500042	0.469949		1.2004	0.969216	0.757674		1.2004	0.277656	0.310033		1.2004	0.354638	0.32833		1.2004	0.288375	0.309743		1.2004	0.333942	0.461525		1.2004
	1.30952	0.182429	0.36376		1.30952	0.049188	0.365671		1.30952	0.271072	0.486288		1.30952	0.910812	0.983667		1.30952	0.316612	0.299437		1.30952	0.299606	0.389028		1.30952	0.529159	0.405863		1.30952	0.955788	0.959331		1.30952	0.255391	0.245759		1.30952	0.368098	0.416953		1.30952	0.306045	0.376498		1.30952	0.395305	0.358009		1.30952
	1.41865	0.306181	0.449392		1.41865	0.126451	0.166439		1.41865	0.265061	0.449499		1.41865	0.804725	1		1.41865	0.351709	0.299096		1.41865	0.372118	0.561972		1.41865	0.375786	0.428108		1.41865	0.937771	0.866375		1.41865	0.273633	0.2633		1.41865	0.435548	0.410226		1.41865	0.344122	0.495122		1.41865	0.41903	0.345615		1.41865
	1.52778	0.464623	0.488305		1.52778	0.218639	0.570529		1.52778	0.24676	0.516713		1.52778	0.685549	0.936412		1.52778	0.447155	0.390802		1.52778	0.392081	0.47419		1.52778	0.355968	0.441082		1.52778	0.824071	0.846913		1.52778	0.300748	0.308224		1.52778	0.484807	0.317169		1.52778	0.414461	0.540875		1.52778	0.485525	0.525237		1.52778
	1.6369	0.627285	0.631692		1.6369	0.344634	0.624049		1.6369	0.238278	0.448909		1.6369	0.539761	0.902512		1.6369	0.535819	0.363515		1.6369	0.466997	0.485522		1.6369	0.245388	0.607187		1.6369	0.694945	0.762336		1.6369	0.355781	0.37265		1.6369	0.490616	0.390501		1.6369	0.486021	0.556333		1.6369	0.573958	0.64974		1.6369
	1.74603	0.77568	0.796729		1.74603	0.404883	0.411373		1.74603	0.315366	0.399076		1.74603	0.490596	0.654023		1.74603	0.635691	0.44925		1.74603	0.468634	0.632076		1.74603	0.198104	0.486232		1.74603	0.655263	0.766131		1.74603	0.389924	0.295542		1.74603	0.465774	0.429173		1.74603	0.577403	0.568211		1.74603	0.675737	0.612583		1.74603
	1.85516	0.827991	0.90922		1.85516	0.454331	0.599151		1.85516	0.480638	0.513974		1.85516	0.506441	0.461174		1.85516	0.773751	0.389639		1.85516	0.619372	0.660421		1.85516	0.192135	0.593359		1.85516	0.661929	0.705437		1.85516	0.435167	0.241999		1.85516	0.459757	0.345517		1.85516	0.593516	0.522982		1.85516	0.775678	0.472509		1.85516
	1.96429	0.909802	1		1.96429	0.502288	0.81126		1.96429	0.624891	0.565385		1.96429	0.469601	0.605241		1.96429	0.867703	0.496769		1.96429	0.629286	0.81704		1.96429	0.198379	0.705256		1.96429	0.621718	0.639167		1.96429	0.516106	0.31673		1.96429	0.447393	0.276568		1.96429	0.55876	0.423199		1.96429	0.820873	0.346455		1.96429
	2.07341	0.929637	0.941656		2.07341	0.555524	0.779962		2.07341	0.758936	0.737978		2.07341	0.558471	0.437603		2.07341	0.928297	0.674938		2.07341	0.746208	0.579184		2.07341	0.283621	0.867631		2.07341	0.615624	0.716049		2.07341	0.646727	0.451207		2.07341	0.424442	0.31051		2.07341	0.485207	0.318348		2.07341	0.769308	0.337764		2.07341
	2.18254	0.899328	0.787414		2.18254	0.654361	0.847328		2.18254	0.927083	0.841107		2.18254	0.671113	0.358158		2.18254	0.988138	0.663035		2.18254	0.780726	0.730093		2.18254	0.437475	1		2.18254	0.664022	0.723105		2.18254	0.755884	0.447987		2.18254	0.431622	0.301199		2.18254	0.420938	0.327447		2.18254	0.688025	0.227419		2.18254
	2.29167	0.896455	0.731038		2.29167	0.760913	0.812195		2.29167	0.947524	0.910126		2.29167	0.801535	0.510693		2.29167	0.948362	0.724744		2.29167	0.889156	0.774905		2.29167	0.479441	0.943806		2.29167	0.700528	0.757053		2.29167	0.865901	0.809328		2.29167	0.47919	0.280544		2.29167	0.386238	0.329695		2.29167	0.55184	0.273978		2.29167
	2.40079	0.892675	0.676512		2.40079	0.854023	0.900796		2.40079	0.951502	1		2.40079	0.822065	0.682634		2.40079	0.835016	0.645859		2.40079	0.924937	0.850172		2.40079	0.587951	0.685589		2.40079	0.834135	0.781227		2.40079	0.960124	0.890007		2.40079	0.53899	0.354843		2.40079	0.315452	0.360445		2.40079	0.452075	0.426081		2.40079
	2.50992	0.934126	0.550638		2.50992	0.982073	0.926166		2.50992	0.960065	0.842012		2.50992	0.755186	0.824224		2.50992	0.74245	0.466109		2.50992	0.899791	0.884858		2.50992	0.638039	0.412235		2.50992	0.930834	0.954667		2.50992	1	0.928651		2.50992	0.600483	0.280889		2.50992	0.309815	0.353405		2.50992	0.458792	0.482801		2.50992
	2.61905	0.900594	0.484227		2.61905	1	0.731617		2.61905	1	0.688805		2.61905	0.71861	0.727518		2.61905	0.71424	0.352621		2.61905	0.916504	0.865222		2.61905	0.703649	0.420384		2.61905	0.871365	0.823351		2.61905	0.962469	1		2.61905	0.71185	0.351916		2.61905	0.30985	0.41049		2.61905	0.440527	0.450989		2.61905
	2.72817	0.91352	0.414368		2.72817	0.922783	0.662663		2.72817	0.955943	0.787792		2.72817	0.766291	0.726522		2.72817	0.718753	0.312933		2.72817	1	1		2.72817	0.765147	0.608526		2.72817	0.97576	0.716942		2.72817	0.8845	0.835431		2.72817	0.791213	0.506398		2.72817	0.317885	0.305538		2.72817	0.453786	0.582005		2.72817
	2.8373	0.939711	0.481498		2.8373	0.926074	0.816399		2.8373	0.855677	0.672713		2.8373	0.852052	0.593594		2.8373	0.82657	0.369551		2.8373	0.994552	0.747341		2.8373	0.752405	0.374178		2.8373	1	0.626138		2.8373	0.868867	0.861677		2.8373	0.878141	0.538362		2.8373	0.377057	0.544861		2.8373	0.50297	0.647817		2.8373
	2.94643	0.869873	0.612051		2.94643	0.968689	0.753333		2.94643	0.829454	0.614527		2.94643	0.914767	0.519261		2.94643	0.940716	0.405117		2.94643	0.890356	0.728165		2.94643	0.653519	0.324735		2.94643	0.906496	0.640529		2.94643	0.833141	0.619868		2.94643	0.983063	0.653723		2.94643	0.47366	0.634238		2.94643	0.51995	0.740217		2.94643
	3.05556	0.905982	0.593229		3.05556	0.880683	0.684513		3.05556	0.783171	0.431057		3.05556	0.923024	0.402503		3.05556	1	0.365617		3.05556	0.845562	0.741686		3.05556	0.588366	0.467493		3.05556	0.809871	0.471782		3.05556	0.753292	0.576147		3.05556	1	0.809652		3.05556	0.613086	0.827377		3.05556	0.514155	0.911854		3.05556
	3.16468	0.823497	0.429401		3.16468	0.852499	0.849481		3.16468	0.742428	0.382988		3.16468	0.869201	0.409219		3.16468	0.981231	0.35195		3.16468	0.837066	0.648889		3.16468	0.450312	0.515514		3.16468	0.643658	0.663767		3.16468	0.683907	0.466769		3.16468	0.990362	0.792776		3.16468	0.80805	1		3.16468	0.513789	0.94373		3.16468
	3.27381	0.779523	0.701691		3.27381	0.820961	0.761689		3.27381	0.764618	0.368811		3.27381	0.828117	0.410311		3.27381	0.940402	0.376659		3.27381	0.811587	0.593624		3.27381	0.362662	0.573494		3.27381	0.658403	0.667453		3.27381	0.620686	0.330037		3.27381	0.86396	0.730533		3.27381	0.942326	0.956149		3.27381	0.524902	0.923093		3.27381
	3.38294	0.767379	0.5676		3.38294	0.779313	0.751306		3.38294	0.781663	0.36851		3.38294	0.768841	0.27886		3.38294	0.790282	0.4903		3.38294	0.802645	0.602156		3.38294	0.280991	0.645506		3.38294	0.599327	0.458508		3.38294	0.544659	0.354114		3.38294	0.681056	0.588549		3.38294	1	0.919925		3.38294	0.612462	0.975775		3.38294
	3.49206	0.80707	0.61404		3.49206	0.754629	1		3.49206	0.734999	0.32394		3.49206	0.750542	0.245557		3.49206	0.681771	0.508845		3.49206	0.827362	0.540877		3.49206	0.277485	0.752379		3.49206	0.498845	0.644913		3.49206	0.521313	0.387141		3.49206	0.600838	0.404464		3.49206	0.900216	0.737788		3.49206	0.723235	1		3.49206
	3.60119	0.785628	0.617788		3.60119	0.668038	0.751579		3.60119	0.649396	0.354135		3.60119	0.786723	0.331934		3.60119	0.672697	0.794427		3.60119	0.843974	0.476171		3.60119	0.315996	0.611219		3.60119	0.527278	0.524188		3.60119	0.53181	0.339926		3.60119	0.503983	0.270588		3.60119	0.77682	0.620793		3.60119	0.856409	0.810724		3.60119
	3.71032	0.772995	0.498381		3.71032	0.678576	0.592999		3.71032	0.524625	0.35714		3.71032	0.78536	0.396062		3.71032	0.685007	0.767269		3.71032	0.824882	0.480994		3.71032	0.309699	0.808707		3.71032	0.497314	0.500419		3.71032	0.560429	0.40707		3.71032	0.473966	0.272081		3.71032	0.673306	0.484308		3.71032	0.954429	0.700371		3.71032
	3.81944	0.850173	0.663538		3.81944	0.670977	0.655031		3.81944	0.625288	0.287923		3.81944	0.766579	0.422095		3.81944	0.614385	0.871314		3.81944	0.765943	0.386784		3.81944	0.402819	0.66578		3.81944	0.495847	0.554466		3.81944	0.612588	0.468322		3.81944	0.415059	0.18653		3.81944	0.597801	0.568454		3.81944	1	0.6112		3.81944
	3.92857	0.894498	0.484327		3.92857	0.58275	0.694087		3.92857	0.698916	0.125937		3.92857	0.694286	0.367336		3.92857	0.615469	0.760536		3.92857	0.78594	0.495166		3.92857	0.51556	0.849417		3.92857	0.577445	0.710069		3.92857	0.63922	0.48575		3.92857	0.416942	0.177709		3.92857	0.46784	0.577256		3.92857	0.943999	0.571859		3.92857
	4.0377	1	0.503708		4.0377	0.51898	0.599125		4.0377	0.731291	0.147521		4.0377	0.666185	0.283282		4.0377	0.629254	0.846409		4.0377	0.775271	0.304611		4.0377	0.584876	0.783351		4.0377	0.574003	0.927984		4.0377	0.593055	0.601739		4.0377	0.408225	0.248953		4.0377	0.379606	0.581703		4.0377	0.876201	0.653203		4.0377
	4.14683	0.983474	0.396516		4.14683	0.461486	0.351511		4.14683	0.714409	0.194781		4.14683	0.537787	0.143256		4.14683	0.607983	0.71975		4.14683	0.755863	0.197633		4.14683	0.532975	0.56744		4.14683	0.638468	1		4.14683	0.598181	0.655594		4.14683	0.329093	0.23425		4.14683	0.316899	0.554453		4.14683	0.764442	0.714582		4.14683
	4.25595	0.881487	0.350956		4.25595	0.512604	0.486314		4.25595	0.681715	0.409077		4.25595	0.511773	0.173994		4.25595	0.569652	0.790068		4.25595	0.584889	0.186452		4.25595	0.462161	0.399108		4.25595	0.605462	0.917964		4.25595	0.574738	0.686491		4.25595	0.280101	0.239141		4.25595	0.258615	0.550679		4.25595	0.635882	0.596695		4.25595
	4.36508	0.779478	0.350416		4.36508	0.511427	0.306951		4.36508	0.556141	0.228339		4.36508	0.439578	0.0894722		4.36508	0.544027	1		4.36508	0.527831	0.0330507		4.36508	0.534289	0.300199		4.36508	0.47448	0.631306		4.36508	0.579364	0.646492		4.36508	0.263396	0.298869		4.36508	0.24332	0.409715		4.36508	0.584196	0.619062		4.36508
	4.47421	0.749924	0.442845		4.47421	0.610787	0.133695		4.47421	0.401339	0.0571575		4.47421	0.378705	0.16791		4.47421	0.504383	0.941957		4.47421	0.442969	0.129012		4.47421	0.583899	0.417119		4.47421	0.457065	0.660048		4.47421	0.524423	0.56246		4.47421	0.295215	0.398235		4.47421	0.259549	0.383224		4.47421	0.623874	0.701408		4.47421
	4.58333	0.685073	0.359212		4.58333	0.610406	0.0796077		4.58333	0.413232	0.0193323		4.58333	0.275838	0.219054		4.58333	0.454651	0.808471		4.58333	0.4364	0.20391		4.58333	0.528451	0.395634		4.58333	0.432707	0.367253		4.58333	0.399486	0.539198		4.58333	0.351165	0.373139		4.58333	0.295398	0.336304		4.58333	0.67744	0.666757		4.58333
	4.69246	0.627222	0.416047		4.69246	0.617419	0.0386714		4.69246	0.386002	0.10952		4.69246	0.244653	0.0284891		4.69246	0.375184	0.696573		4.69246	0.398337	0.202465		4.69246	0.418203	0.27424		4.69246	0.415729	0.283843		4.69246	0.269683	0.391782		4.69246	0.428773	0.483458		4.69246	0.315938	0.29611		4.69246	0.712629	0.59889		4.69246
	4.80159	0.722722	0.383151		4.80159	0.636401	0.253896		4.80159	0.373942	0.0186037		4.80159	0.239384	0.0494433		4.80159	0.342391	0.314725		4.80159	0.307607	0		4.80159	0.353217	0.261086		4.80159	0.357271	0.341417		4.80159	0.176661	0.372953		4.80159	0.531465	0.545556		4.80159	0.299795	0.332835		4.80159	0.670361	0.645619		4.80159
	4.91071	0.652197	0.275339		4.91071	0.66677	0.189168		4.91071	0.449059	0		4.91071	0.255653	0.0497436		4.91071	0.286766	0.367834		4.91071	0.201149	0.169656		4.91071	0.318463	0.324372		4.91071	0.275364	0.248479		4.91071	0.126436	0.330672		4.91071	0.611803	0.74071		4.91071	0.251909	0.301435		4.91071	0.618931	0.495446		4.91071
	5.01984	0.809018	0.211027		5.01984	0.643342	0.29861		5.01984	0.475875	0.083949		5.01984	0.315368	0		5.01984	0.224219	0.288123		5.01984	0.101873	0.127699		5.01984	0.300672	0.349348		5.01984	0.22364	0.136609		5.01984	0.0547945	0.214238		5.01984	0.681201	0.950592		5.01984	0.204635	0.192834		5.01984	0.570583	0.435381		5.01984
	5.12897	0.868454	0.186058		5.12897	0.698726	0.171276		5.12897	0.429274	0.107857		5.12897	0.356278	0.13567		5.12897	0.186834	0.180333		5.12897	0.0917097	0.313465		5.12897	0.324674	0.188419		5.12897	0.1756	0.0537727		5.12897	0.0216012	0.180273		5.12897	0.675944	0.976451		5.12897	0.165567	0.246159		5.12897	0.564996	0.430876		5.12897
	5.2381	0.81028	0.241554		5.2381	0.780837	0.173752		5.2381	0.489783	0.100842		5.2381	0.346991	0.157549		5.2381	0.101597	0.123865		5.2381	0.112766	0.181086		5.2381	0.280707	0.188185		5.2381	0.191849	0.135817		5.2381	0.011876	0.169011		5.2381	0.669739	1		5.2381	0.131159	0.314848		5.2381	0.563987	0.284532		5.2381
	5.34722	0.789112	0.289043		5.34722	0.863978	0.432466		5.34722	0.595975	0.0968093		5.34722	0.377223	0.195632		5.34722	0.104365	0.117777		5.34722	0.129865	0.223318		5.34722	0.198193	0.030466		5.34722	0.205677	0.139576		5.34722	0.0118626	0.122411		5.34722	0.682048	0.904878		5.34722	0.0926513	0.278781		5.34722	0.525841	0.260651		5.34722
	5.45635	0.615482	0.245002		5.45635	0.848877	0.270256		5.45635	0.727361	0.0966317		5.45635	0.365191	0.154118		5.45635	0.116	0.0829331		5.45635	0.172311	0.377495		5.45635	0.106378	0		5.45635	0.30915	0.0992851		5.45635	0.0503319	0.105551		5.45635	0.679446	0.794744		5.45635	0.0709792	0.252384		5.45635	0.483312	0.280954		5.45635
	5.56548	0.567499	0.230259		5.56548	0.812998	0.31369		5.56548	0.866818	0.199681		5.56548	0.299435	0.149429		5.56548	0.111581	0.0371579		5.56548	0.223715	0.468005		5.56548	0.0319299	0.128136		5.56548	0.254939	0.114912		5.56548	0.0538506	0.113091		5.56548	0.609128	0.461874		5.56548	0.059473	0.23172		5.56548	0.43094	0.316778		5.56548
	5.6746	0.443563	0.176272		5.6746	0.765925	0.212582		5.6746	0.87234	0.143068		5.6746	0.231175	0.0607632		5.6746	0.0952959	0.0466715		5.6746	0.213056	0.623718		5.6746	0.0162561	0.323172		5.6746	0.199505	0.0101249		5.6746	0.0353133	0.0748823		5.6746	0.460042	0.388656		5.6746	0.0133062	0.140056		5.6746	0.367886	0.324414		5.6746
	5.78373	0.433875	0		5.78373	0.688322	0.17048		5.78373	0.763751	0.275836		5.78373	0.151585	0.118488		5.78373	0.065479	0.0503748		5.78373	0.170474	0.568645		5.78373	0	0.28839		5.78373	0.231739	0.0610469		5.78373	0.0409271	0.0142831		5.78373	0.322573	0.271327		5.78373	0	0.169647		5.78373	0.286948	0.272494		5.78373
	5.89286	0.409654	0.059054		5.89286	0.660222	0.260328		5.89286	0.668382	0.267862		5.89286	0.0854596	0.162675		5.89286	0.0383095	0		5.89286	0.186815	0.410247		5.89286	0.00894921	0.346437		5.89286	0.245071	0.00674369		5.89286	0.0433214	0.0388524		5.89286	0.23278	0.234408		5.89286	0.00301962	0.162498		5.89286	0.224809	0.224777		5.89286
	6.00198	0.39395	0.174093		6.00198	0.618867	0.323279		6.00198	0.500987	0.132266		6.00198	0.052373	0.240102		6.00198	0.0285282	0.0653742		6.00198	0.169902	0.604396		6.00198	0.0110842	0.311256		6.00198	0.158057	0		6.00198	0.0281781	0.0325728		6.00198	0.169201	0.125515		6.00198	0.00933094	0.128765		6.00198	0.217282	0.213526		6.00198
	6.11111	0.510281	0.0444105		6.11111	0.58527	0		6.11111	0.348334	0.117537		6.11111	0.0631916	0.0318103						6.11111	0.0872267	0.362865		6.11111	0.0630028	0.353074		6.11111	0.121477	0.128065		6.11111	0.0401539	0.0680344		6.11111	0.126133	0.0271204		6.11111	0.0291629	0.0632547		6.11111	0.253396	0.171307		6.11111
					6.22024	0.520977	0.177066		6.22024	0.275428	0.286357		6.22024	0	0.168786						6.22024	0.0916878	0.46162		6.22024	0.110732	0.168227		6.22024	0.0560945	0.0598379		6.22024	0.0227965	0.184061		6.22024	0.113857	0.0351639		6.22024	0.0304643	0.0896356		6.22024	0.281248	0.0463682		6.22024
					6.32937	0.488623	0.135188		6.32937	0.207099	0.229656		6.32937	0.0718297	0.0626917						6.32937	0.0389789	0.414792		6.32937	0.142575	0.281631		6.32937	0.0205307	0.210426		6.32937	0	0.060476		6.32937	0.16812	0.00761323		6.32937	0.0371348	0.083841		6.32937	0.263531	0.139259		6.32937
					6.43849	0.489967	0.0448547		6.43849	0.188706	0.17173		6.43849	0.0852327	0.0483799						6.43849	0.00209125	0.420441		6.43849	0.266673	0.308745						6.43849	0.0273857	0		6.43849	0.171413	0		6.43849	0.0464081	0.12474		6.43849	0.268253	0.13027		6.43849
									6.54762	0.19454	0.299338														6.54762	0.482209	0.364037						6.54762	0.095806	0.039648		6.54762	0.160233	0.0304997		6.54762	0.0308489	0.0774435		6.54762	0.228669	0.174575		6.54762
																									6.65675	0.768234	0.62503										6.65675	0.0985628	0.0552061		6.65675	0.032803	0.00862136		6.65675	0.17419	0.124837		6.65675
																																					6.76587	0.03055	0.00934157		6.76587	0.0379028	0.0353155		6.76587	0.121304	0.185753		6.76587
																																					6.875	0	0.0277256		6.875	0.00947971	0.0177126		6.875	0.0857279	0.0519394		6.875
																																					6.98413	0.0226159	0.151511		6.98413	0.031251	0.0255196		6.98413	0.0348598	0		6.98413
																																					7.09325	0.034353	0.0892765		7.09325	0.0304428	0.0547664		7.09325	0.0421206	0.100978
[truncated: 50 more columns]

## Sheet: exp1 endosome2
frame #	19				20				21				22				23				24				25				26				27				28				29				30				31
line profiles		Rab7	Snx1			Rab7	Snx1			Rab7	Snx1			Rab7	Snx1			Rab7	Snx1			Rab7	Snx1			Rab7	Snx1			Rab7	Snx1			Rab7	Snx1			Rab7	Snx1			Rab7	Snx1			Rab7	Snx1
	0	522.291	300.019		0	526.163	286.12		0	540.788	300.763		0	542.504	295.686		0	639.09	311.437		0	523.552	296.735		0	542.369	273.435		0	606.618	276.618		0	522.278	280.644		0	508.067	276.918		0	605.634	294.582		0	692.913	299.087		0
	0.10913	533.07	299.986		0.10913	510.266	286.279		0.10913	557.294	306.632		0.10913	552.493	288.939		0.10913	646.955	353.095		0.10913	532.042	293.014		0.10913	537.202	271.421		0.10913	599.605	286.7		0.10913	515.02	289.245		0.10913	512.056	272.019		0.10913	604.919	286.828		0.10913	725.448	291.422		0.10913
	0.21825	531.886	282.219		0.21825	497.304	289.25		0.21825	568.77	295.426		0.21825	552.952	282.761		0.21825	640.847	362.214		0.21825	547.693	288.148		0.21825	553.847	275.185		0.21825	597.041	296.771		0.21825	514.73	291.15		0.21825	512.034	267.264		0.21825	624.059	286.851		0.21825	725.789	301.967		0.21825
	0.32738	535.163	280.778		0.32738	510.869	288.971		0.32738	558.415	298.552		0.32738	550.307	287.274		0.32738	638.282	329.321		0.32738	568.368	284.835		0.32738	558.13	281.683		0.32738	602.124	314.868		0.32738	516.257	289.447		0.32738	506.783	272.589		0.32738	649.036	297.739		0.32738	721.553	306.879		0.32738
	0.43651	529.626	300.999		0.43651	512.456	283.489		0.43651	581.142	301.369		0.43651	557.593	290.243		0.43651	611.854	308.23		0.43651	576.288	282.485		0.43651	554.178	285.593		0.43651	603.165	329.236		0.43651	527.768	288.966		0.43651	512.842	273.863		0.43651	686.203	291.387		0.43651	693.143	311.267		0.43651
	0.54563	509.027	294.509		0.54563	501.736	296.135		0.54563	575.548	309.749		0.54563	555.903	294.56		0.54563	593.211	308.162		0.54563	590.574	283.029		0.54563	552.598	296		0.54563	585.292	324.275		0.54563	526.994	271.417		0.54563	517.601	275.859		0.54563	684.682	296.533		0.54563	672.648	308.721		0.54563
	0.65476	515.257	301.695		0.65476	522.99	287.456		0.65476	575.058	320.53		0.65476	547.797	292.496		0.65476	559.165	300.635		0.65476	610.25	289.729		0.65476	582.029	293.144		0.65476	572.483	309.722		0.65476	512.163	290.566		0.65476	521.134	275.425		0.65476	715.249	303.905		0.65476	655.523	306.872		0.65476
	0.76389	494.729	307.482		0.76389	495.218	287.503		0.76389	559.079	306.263		0.76389	539.325	287.631		0.76389	544.795	291.469		0.76389	612.775	279.848		0.76389	567.64	282.383		0.76389	563.41	296.815		0.76389	520.476	290.33		0.76389	541.885	267.099		0.76389	700.761	286.84		0.76389	646.174	309.34		0.76389
	0.87302	489.881	311.634		0.87302	514.403	279.329		0.87302	553.789	306.128		0.87302	528.643	283.059		0.87302	546.086	300.204		0.87302	584.377	278.841		0.87302	562.109	286.107		0.87302	569.213	295.218		0.87302	529.014	291.328		0.87302	540.651	264.13		0.87302	688.24	290.667		0.87302	643.914	304.534		0.87302
	0.98214	502.872	302.149		0.98214	502.549	280.438		0.98214	550.356	305.061		0.98214	521.922	276.83		0.98214	535.337	306.332		0.98214	578.546	281.176		0.98214	569.58	279.523		0.98214	564.403	284.44		0.98214	532.792	280.755		0.98214	538.671	277.895		0.98214	697.941	296.711		0.98214	660.004	303.834		0.98214
	1.09127	525.71	299.446		1.09127	496.131	276.582		1.09127	556.486	306.228		1.09127	533.227	284.236		1.09127	524.001	298.96		1.09127	552.292	286.09		1.09127	574.118	280.804		1.09127	572.008	280.587		1.09127	525.01	276.706		1.09127	544.112	287.571		1.09127	706.384	289.65		1.09127	670.126	301.744		1.09127
	1.2004	514.193	306.094		1.2004	508.404	284.849		1.2004	549.7	300.029		1.2004	550.472	281.781		1.2004	513.488	303.584		1.2004	553.362	289.785		1.2004	587.256	282.205		1.2004	557.001	285.452		1.2004	539.885	279.183		1.2004	549.673	286.408		1.2004	707.269	302.938		1.2004	651.481	296.195		1.2004
	1.30952	530.074	307.947		1.30952	502.812	274.676		1.30952	548.592	297.758		1.30952	541.492	278.941		1.30952	504.122	311.959		1.30952	546.431	287.092		1.30952	572.072	288.155		1.30952	552.962	274.935		1.30952	540.107	273.187		1.30952	567.578	275.642		1.30952	712.956	304.25		1.30952	634.892	297.533		1.30952
	1.41865	530.795	307.028		1.41865	510.463	276.284		1.41865	544.461	299.793		1.41865	539.229	295.338		1.41865	501.333	305.525		1.41865	533.071	284.675		1.41865	569.22	284.966		1.41865	553.441	279.002		1.41865	546.735	274.568		1.41865	567.184	278.533		1.41865	697.069	296.991		1.41865	633.495	303.558		1.41865
	1.52778	535.943	303.382		1.52778	483.117	289.033		1.52778	537.374	290.945		1.52778	522.34	292.669		1.52778	490.454	308.775		1.52778	536.909	269.63		1.52778	580.141	273.317		1.52778	564.282	273.465		1.52778	553.574	274.419		1.52778	573.126	282.442		1.52778	670.627	291.156		1.52778	619.634	304.656		1.52778
	1.6369	512.17	300.809		1.6369	482.53	272.464		1.6369	531.23	300.865		1.6369	529.138	291.027		1.6369	516.937	295.333		1.6369	531.863	282.874		1.6369	567.635	274.82		1.6369	559.261	270.299		1.6369	568.683	275.808		1.6369	600.809	283.753		1.6369	673.709	299.447		1.6369	618.198	300.414		1.6369
	1.74603	502.624	306.814		1.74603	462.125	274.896		1.74603	519.715	299.863		1.74603	506.681	282.302		1.74603	510.51	297.632		1.74603	523.647	294.554		1.74603	577.957	271.209		1.74603	568.23	269.706		1.74603	561.055	281.975		1.74603	612.447	294.823		1.74603	651.359	298.85		1.74603	594.171	306.381		1.74603
	1.85516	506.042	296.955		1.85516	462.787	278.585		1.85516	514.797	302.243		1.85516	512.141	294.77		1.85516	503.275	290.848		1.85516	511.718	286.979		1.85516	587.098	280.261		1.85516	586.328	275.299		1.85516	580.173	281.089		1.85516	633.752	297.674		1.85516	632.108	295.343		1.85516	595.732	316.921		1.85516
	1.96429	501.756	300.013		1.96429	461.014	280.598		1.96429	515.361	306.02		1.96429	507.452	292.728		1.96429	516.471	293.656		1.96429	515.183	289.131		1.96429	597.92	286.064		1.96429	576.923	283.839		1.96429	575.1	274.701		1.96429	640.99	312.744		1.96429	604.472	299.186		1.96429	605.387	325.164		1.96429
	2.07341	498.84	300.697		2.07341	444.138	278.768		2.07341	521.708	297.241		2.07341	507.451	289.519		2.07341	528.955	306.805		2.07341	511.35	300.174		2.07341	596.923	285.538		2.07341	573.382	286.043		2.07341	583.523	270.795		2.07341	646.802	318.655		2.07341	594.464	311.161		2.07341	597.344	327.25		2.07341
	2.18254	510.683	299.435		2.18254	461.66	288.348		2.18254	524.463	321.272		2.18254	507.066	304.817		2.18254	521.383	298.744		2.18254	499.057	304.95		2.18254	577.872	283.956		2.18254	579.31	283.42		2.18254	567.773	285.25		2.18254	642.937	312.573		2.18254	583.586	304.745		2.18254	615.542	320.085		2.18254
	2.29167	529.256	299.281		2.29167	464.352	297.422		2.29167	508.874	316.977		2.29167	510.104	294.21		2.29167	521.192	290.066		2.29167	497.674	314.18		2.29167	559.322	284.032		2.29167	576.841	284.447		2.29167	586.43	276.208		2.29167	631.744	301.26		2.29167	571.913	302.104		2.29167	621.179	319.246		2.29167
	2.40079	524.775	301.966		2.40079	482.887	291.108		2.40079	512.14	316.075		2.40079	491.26	293.042		2.40079	490.664	284.731		2.40079	500.855	324.014		2.40079	536.339	291.002		2.40079	579.431	292.746		2.40079	591.915	283.408		2.40079	643.385	295.609		2.40079	583.762	305.321		2.40079	619.602	321.043		2.40079
	2.50992	512.258	302.352		2.50992	468.914	294.199		2.50992	489.442	314.632		2.50992	476.101	294.109		2.50992	490.016	282.916		2.50992	510.086	328.113		2.50992	519.036	291.984		2.50992	586.032	293.064		2.50992	589.54	281.434		2.50992	638.084	296.259		2.50992	594.44	311.544		2.50992	625.484	324.69		2.50992
	2.61905	506.874	294.834		2.61905	469.583	291.061		2.61905	489.109	302.422		2.61905	486.627	301.051		2.61905	504.682	289.719		2.61905	529.071	321.911		2.61905	498.991	289.249		2.61905	608.056	291.805		2.61905	616.298	286.65		2.61905	613.274	295.474		2.61905	615.223	319.677		2.61905	629.044	321.558		2.61905
	2.72817	513.639	300.447		2.72817	476.665	286.051		2.72817	499.617	305.71		2.72817	501.137	307.527		2.72817	487.454	294.3		2.72817	539.076	328.962		2.72817	501.833	284.361		2.72817	643.089	292.555		2.72817	660.731	294.464		2.72817	603.57	289.712		2.72817	639.854	317.3		2.72817	632.205	315.766		2.72817
	2.8373	522.327	296.121		2.8373	479.319	290.651		2.8373	493.214	311.503		2.8373	491.64	302.358		2.8373	500.556	287.524		2.8373	569.17	324.652		2.8373	518.412	289.81		2.8373	680.635	288.419		2.8373	717.791	288.758		2.8373	592.699	291.829		2.8373	646.735	321.743		2.8373	651.714	320.718		2.8373
	2.94643	533.681	294.018		2.94643	489.008	294.47		2.94643	495.228	311.729		2.94643	505.377	300.213		2.94643	499.299	295.391		2.94643	549.785	332.081		2.94643	548.618	288.38		2.94643	707.27	291.11		2.94643	763.092	288.61		2.94643	597.174	297.04		2.94643	645.088	318.645		2.94643	660.234	321.821		2.94643
	3.05556	556.052	300.962		3.05556	498.319	297.02		3.05556	514.279	303.418		3.05556	502.008	303.069		3.05556	504.853	301.329		3.05556	550.987	331.173		3.05556	565.528	297.617		3.05556	713.078	291.062		3.05556	766.688	285.939		3.05556	606.321	302.698		3.05556	647.462	318.267		3.05556	679.549	323.76		3.05556
	3.16468	572.558	297.482		3.16468	509.588	299.004		3.16468	511.176	304.033		3.16468	516.583	300.441		3.16468	543.376	291.178		3.16468	572.247	309.163		3.16468	595.413	289.599		3.16468	686.842	292.431		3.16468	753.382	290.258		3.16468	620.463	305.25		3.16468	637.41	315.587		3.16468	704.942	328.289		3.16468
	3.27381	588.312	304.54		3.27381	521.536	303.211		3.27381	519.351	304.521		3.27381	526.576	305.439		3.27381	563.508	289.644		3.27381	575.013	304.309		3.27381	608.812	298.505		3.27381	675.703	297.643		3.27381	728.062	284.135		3.27381	656.126	298.346		3.27381	666.549	302.741		3.27381	701.526	319.429		3.27381
	3.38294	608.08	297.548		3.38294	540.188	297.781		3.38294	539.144	301.322		3.38294	524.82	306.124		3.38294	572.988	291.625		3.38294	557.225	298.51		3.38294	602.009	293.038		3.38294	633.357	294.935		3.38294	699.107	278.494		3.38294	694.685	290.024		3.38294	704.217	307.564		3.38294	721.546	321.971		3.38294
	3.49206	604.855	301.31		3.49206	559.004	302.389		3.49206	546.456	313.706		3.49206	539.376	304.18		3.49206	584.76	280.374		3.49206	572.115	287.441		3.49206	573.677	296.985		3.49206	624.44	301.052		3.49206	680.77	279.042		3.49206	732.601	302.628		3.49206	741.274	308.937		3.49206	749.334	322.86		3.49206
	3.60119	601.176	297.945		3.60119	587.919	304.9		3.60119	564.998	308.185		3.60119	545.099	297.056		3.60119	614.772	278.67		3.60119	571.339	295.486		3.60119	569.08	292.471		3.60119	598.011	302.978		3.60119	647.489	279.741		3.60119	740.103	301.841		3.60119	765.152	304.274		3.60119	763.922	311.201		3.60119
	3.71032	597.434	301.773		3.71032	583.717	301.814		3.71032	590.369	299.981		3.71032	551.721	301.076		3.71032	614.818	299.182		3.71032	561.519	291.52		3.71032	563.487	284.277		3.71032	583.397	297.576		3.71032	623.609	284.462		3.71032	720.352	293.985		3.71032	767.665	293.485		3.71032	745.224	294.025		3.71032
	3.81944	572.659	298.187		3.81944	569.598	298.583		3.81944	593.109	297.371		3.81944	577.486	303.663		3.81944	612.472	294.127		3.81944	561.732	292.491		3.81944	560.851	278.266		3.81944	570.852	297.566		3.81944	622.594	278.518		3.81944	712.176	298.99		3.81944	737.185	292.881		3.81944	742.5	299.333		3.81944
	3.92857	546.186	298.283		3.92857	567.723	303.303		3.92857	600.572	298.687		3.92857	590.46	298.566		3.92857	602.214	282.605		3.92857	553.229	293.975		3.92857	563.796	281.477		3.92857	591.9	292.221		3.92857	613.385	270.758		3.92857	646.045	289.578		3.92857	718.846	288.677		3.92857	720.106	286.41		3.92857
	4.0377	517.557	296.654		4.0377	559.807	299.926		4.0377	603.061	291.054		4.0377	582.34	292.036		4.0377	574.694	279.172		4.0377	534.068	281.489		4.0377	558.489	274.521		4.0377	598.899	290.228		4.0377	621.48	269.64		4.0377	626.742	280.046		4.0377	681.434	281.994		4.0377	731.308	277.545		4.0377
	4.14683	497.012	293.442		4.14683	524.693	299.414		4.14683	597.585	281.801		4.14683	585.989	295.172		4.14683	543.844	286.253		4.14683	537.379	276.734		4.14683	553.027	270.724		4.14683	588.031	282.408		4.14683	642.32	266.6		4.14683	646.248	272.952		4.14683	652.266	283.273		4.14683	728.715	281.366		4.14683
	4.25595	473.702	288.171		4.25595	499.713	295.015		4.25595	579.339	287.01		4.25595	583.33	294.638		4.25595	534.258	292.455		4.25595	544.948	276.557		4.25595	552.007	267.661		4.25595	590.311	282.058		4.25595	650.226	270.903		4.25595	634.911	272.168		4.25595	641.752	282.801		4.25595	704.725	287.202		4.25595
	4.36508	460.793	286.244		4.36508	468.481	303.03		4.36508	565.085	302.108		4.36508	568.163	297.241		4.36508	520.063	288.83		4.36508	537.892	278.738		4.36508	538.059	272.729		4.36508	592.253	277.38		4.36508	656.572	275.676		4.36508	621.925	275.35		4.36508	636.44	289.267		4.36508	728.664	280.518		4.36508
	4.47421	451.897	304.617		4.47421	466.813	306.875		4.47421	519.094	300.129		4.47421	544.519	302.844		4.47421	497.341	283.763		4.47421	546.882	279.547		4.47421	515.861	276.051		4.47421	582.225	281.328		4.47421	633.878	279.988		4.47421	637.763	285.154		4.47421	613.459	276.643		4.47421	732.951	288.562		4.47421
	4.58333	428.347	292.266		4.58333	449.099	304.926		4.58333	488.066	293.059		4.58333	507.228	307.033		4.58333	499.522	287.18		4.58333	532.614	280.702		4.58333	497.07	271.403		4.58333	578.556	287.114		4.58333	599.451	280.141		4.58333	639.31	283.127		4.58333	591.587	274.759		4.58333	705.713	282.06		4.58333
	4.69246	421.818	291.342		4.69246	446.273	302.674		4.69246	470.286	303.747		4.69246	507.539	295.077		4.69246	503.383	287.009		4.69246	538.102	288.256		4.69246	471.006	272.529		4.69246	594.416	289.228		4.69246	534.425	277.435		4.69246	637.805	280.933		4.69246	534.018	275.224		4.69246	659.135	277.263		4.69246
	4.80159	415.086	294.339		4.80159	449.729	296.138		4.80159	484.236	289.503		4.80159	485.081	285.758		4.80159	494.337	278.631		4.80159	552.62	282.583		4.80159	466.562	270.721		4.80159	582.086	291.144		4.80159	500.764	280.467		4.80159	625.88	292.695		4.80159	536.278	296.941		4.80159	627.012	279.693		4.80159
	4.91071	423.206	295.151		4.91071	456.151	295.037		4.91071	469.975	287.082		4.91071	466.925	286.615		4.91071	472.661	281.063		4.91071	577.399	282.404		4.91071	455.328	271.862		4.91071	545.122	283.076		4.91071	472.453	282.265		4.91071	580.543	288.399		4.91071	505.298	289.986		4.91071	572.661	286.505		4.91071
	5.01984	412.843	290.293		5.01984	451.776	293.666		5.01984	470.346	279.424		5.01984	464.529	294.425		5.01984	461.224	287.076		5.01984	598.924	281.226		5.01984	455.177	268.237		5.01984	504.471	280.595		5.01984	477.081	279.087		5.01984	571.514	288.201		5.01984	478.979	280.074		5.01984	541.051	286.252		5.01984
	5.12897	429.064	281.204		5.12897	486.058	286.131		5.12897	460.046	280.925		5.12897	473.928	296.353		5.12897	465.529	286.706		5.12897	614.013	284.337		5.12897	449.427	264.126		5.12897	458.221	283.12		5.12897	467.345	281.215		5.12897	542.765	285.036		5.12897	468.677	286.455		5.12897	516.703	296.45		5.12897
	5.2381	441.748	286.923		5.2381	505.485	284.296		5.2381	456.927	292.087		5.2381	483.733	286.827		5.2381	485.276	281.744		5.2381	622.695	281.947		5.2381	461.469	266.573		5.2381	463.24	277.316		5.2381	497.088	276.466		5.2381	507.302	299.529		5.2381	466.702	276.423		5.2381	494.358	299.821		5.2381
	5.34722	450.384	292.871		5.34722	527.894	290.794		5.34722	452.019	288.22		5.34722	491.803	271.632		5.34722	517.978	279.947		5.34722	626.449	272.616		5.34722	479.85	263.435		5.34722	478.269	275.509		5.34722	539.727	263.827		5.34722	482.013	291.018		5.34722	466.339	274.011		5.34722	507.169	289.945		5.34722
	5.45635	438.72	280.328		5.45635	524.037	290.196		5.45635	441.489	293.906		5.45635	492.922	270.757		5.45635	554.288	278.239		5.45635	643.844	268.741		5.45635	505.906	270.834		5.45635	489.931	281.79		5.45635	528.138	264.904		5.45635	491.157	297.222		5.45635	471.292	271.846		5.45635	523.795	292.775		5.45635
	5.56548	436.127	287.722		5.56548	508.709	296.406		5.56548	438.994	289.302		5.56548	498.232	288.046		5.56548	586.931	276.984		5.56548	654.45	267.628		5.56548	534.396	272.279		5.56548	509.23	281.899		5.56548	499.803	263.678		5.56548	479.517	291.999		5.56548	469.622	275.168		5.56548	512.495	292.478		5.56548
	5.6746	435.033	290.268		5.6746	495.062	307.493		5.6746	439.347	282.191		5.6746	489.817	288.853		5.6746	585.077	284.541		5.6746	647.074	287.86		5.6746	548.066	278.929		5.6746	539.195	274.96		5.6746	466.324	275.051		5.6746	493.567	295.869		5.6746	469.562	277.355		5.6746	499.821	286.93		5.6746
	5.78373	442.882	277.221		5.78373	478.485	303.23		5.78373	462.539	276.321		5.78373	523.768	280.163		5.78373	589.693	277.133		5.78373	645.628	295.484		5.78373	530.518	266.083		5.78373	554.292	270.508		5.78373	452.067	281.069		5.78373	516.028	292.233		5.78373	466.419	286.679		5.78373	501.04	282.668		5.78373
	5.89286	465.426	283.226		5.89286	476.823	286.707		5.89286	466.044	280.234		5.89286	528.061	283.295		5.89286	621.614	280.76		5.89286	643.826	299.184		5.89286	524.007	268.4		5.89286	557.399	269.629		5.89286	447.759	282.823		5.89286	551.22	297.711		5.89286	469.799	283.425		5.89286	504.463	293.051		5.89286
	6.00198	496.197	285.084		6.00198	513.054	285.896		6.00198	495.15	278.635		6.00198	542.361	290.508		6.00198	616.223	293.791		6.00198	659.538	307.998		6.00198	550.498	274.119		6.00198	557.275	269.569		6.00198	449.464	285.102		6.00198	573.849	286.117		6.00198	466.327	282.741		6.00198	515.975	287.058		6.00198
	6.11111	546.96	282.93		6.11111	526.919	289.594		6.11111	520.57	281.588		6.11111	565.786	274.418		6.11111	608.288	293.434		6.11111	674.765	317.987		6.11111	555.284	281.991		6.11111	544.987	278.83		6.11111	476.572	286.962		6.11111	571.932	285.666		6.11111	479.96	286.888		6.11111	522.006	290.741		6.11111
	6.22024	573.039	293.605		6.22024	535.75	295.218		6.22024	539.265	286.288		6.22024	597.198	291.67		6.22024	629.776	293.246		6.22024	680.088	325.155		6.22024	562.38	267.305		6.22024	547.695	270.827		6.22024	497.619	293.399		6.22024	561.106	295.122		6.22024	476.274	297.109		6.22024	532.303	298.98		6.22024
	6.32937	611.724	288.272		6.32937	546.026	289.582		6.32937	561.902	291.096		6.32937	614.068	277.506		6.32937	638.694	289.416		6.32937	667.985	322.638		6.32937	545.774	262.977		6.32937	568.22	281.035		6.32937	540.712	285.343		6.32937	567.244	283.207		6.32937	491.282	294.032		6.32937	545.501	302.715		6.32937
	6.43849	656.475	289.781		6.43849	551.166	293.397		6.43849	580.186	280.78		6.43849	602.665	276.026		6.43849	659.865	282.675		6.43849	644.451	310.08		6.43849	552.338	262.495		6.43849	577.154	285.068		6.43849	590.458	278.324		6.43849	564.937	288.125		6.43849	507.351	290.207		6.43849	576.531	295.905		6.43849
	6.54762	647.803	288.349		6.54762	558.887	291.458		6.54762	570.224	279.011		6.54762	609.134	285.147		6.54762	699.492	281.157		6.54762	630.682	305.926		6.54762	567.002	264.965		6.54762	591.459	280.656		6.54762	627.351	277.242		6.54762	586.58	283.442		6.54762	558.409	287.975		6.54762	588.268	307.021		6.54762
	6.65675	619.804	294.452		6.65675	572.639	285.301		6.65675	575.899	282.324		6.65675	609.251	284.393		6.65675	726.079	280.955		6.65675	631.456	301.614		6.65675	582.204	273.598		6.65675	604.821	280.264		6.65675	662.319	269.15		6.65675	584.728	297.68		6.65675	569.723	286.768		6.65675	633.564	304.515		6.65675
	6.76587	602.584	300.792		6.76587	576.515	286.904		6.76587	577.815	276.709		6.76587	628.981	278.433		6.76587	725.888	290.805		6.76587	634.073	287.141		6.76587	605.827	274.739		6.76587	602.776	282.555		6.76587	667.144	263.582		6.76587	593.748	281.745		6.76587	601.872	295.713		6.76587	682.177	298.515		6.76587
	6.875	562.837	309.926		6.875	601.939	289.403		6.875	594.373	287.2		6.875	643.379	283.765		6.875	721.036	276.294		6.875	637.841	278.457		6.875	611.521	281.011		6.875	610.099	267.744		6.875	650.581	267.545		6.875	588.62	281.662		6.875	603.259	304.279		6.875	703.816	289.384		6.875
	6.98413	532.023	301.053		6.98413	621.28	293.172		6.98413	609.607	284.702		6.98413	676.144	282.783		6.98413	718.155	281.494		6.98413	637.303	276.929		6.98413	623.48	277.046		6.98413	612.445	274.379		6.98413	629.733	266.277		6.98413	596.525	278.415		6.98413	620.149	308.498		6.98413	714.765	291.205		6.98413
	7.09325	502.685	297.932		7.09325	661.805	292.719		7.09325	628.833	290.57		7.09325	693.706	288.249		7.09325	721.066	281.462		7.09325	638.984	281.315		7.09325	664.751	280.825		7.09325	638.877	274.681		7.09325	637.708	270.198		7.09325	598.329	272.388		7.09325	640.661	299.347		7.09325	745.382	293.417		7.09325
	7.20238	497.028	294.708		7.20238	673.106	297.908		7.20238	613.845	292.897		7.20238	714.051	287.118		7.20238	721.161	280.144		7.20238	659.124	276.833		7.20238	692.711	271.634		7.20238	667.731	266.156		7.20238	641.53	280.61		7.20238	595.572	266.641		7.20238	655.463	293.662		7.20238	728.055	288.984		7.20238
	7.31151	490.288	297.169		7.31151	650.109	291.417		7.31151	590.489	289.345		7.31151	712.5	291.931		7.31151	749.504	284.955		7.31151	685.5	283.33		7.31151	710.158	284.19		7.31151	666.613	267.648		7.31151	650.016	274.273		7.31151	598.182	260.164		7.31151	636.451	283.716		7.31151	704.537	294.213		7.31151
	7.42063	477.567	301.721		7.42063	586.552	285.075		7.42063	572.456	289.299		7.42063	684.098	288.115		7.42063	752.092	293.162		7.42063	727.622	290.479		7.42063	744.049	297.089		7.42063	660.424	277.347		7.42063	629.376	270.113		7.42063	580.272	264.513		7.42063	602.584	293.116		7.42063	674.152	285.098		7.42063
	7.52976	478.474	292.596		7.52976	560.487	292.954		7.52976	574.649	288.866		7.52976	645.538	287.145		7.52976	741.577	294.334		7.52976	730.891	287.594		7.52976	732.855	296.103		7.52976	679.321	284.363		7.52976	604.416	273.311		7.52976	558.827	259.049		7.52976	586.571	285.883		7.52976	648.77	286.025		7.52976
	7.63889	494.076	295.564		7.63889	511.801	296.314		7.63889	533.191	289.361		7.63889	603.249	286.313		7.63889	710.585	280.925		7.63889	696.247	296.288		7.63889	703.791	308.4		7.63889	700.672	289.812		7.63889	583.283	273.565		7.63889	539.146	264.456		7.63889	598.668	286.053		7.63889	629.789	289.672		7.63889
	7.74802	517.799	297.466		7.74802	508.649	288.587		7.74802	516.958	303.252		7.74802	562.107	298.251		7.74802	699.947	287.005		7.74802	646.119	297.066		7.74802	648.302	309.371		7.74802	682.336	282.453		7.74802	544.258	268.661		7.74802	525.008	262.516		7.74802	573.34	292.204		7.74802	627.099	289.577		7.74802
					7.85714	518.323	284.888		7.85714	526.869	300.526		7.85714	539.787	294.9		7.85714	654.505	285.385		7.85714	597.358	293.62		7.85714	605.093	301.736		7.85714	661.565	282.153		7.85714	551.256	281.996		7.85714	531.768	270.814		7.85714	583.831	295.123		7.85714	623.565	285.905		7.85714
									7.96627	535.61	295.127		7.96627	549.916	288.49		7.96627	615.595	287.13		7.96627	554.852	307.507		7.96627	565.867	295.812		7.96627	624.865	276.343		7.96627	530.783	277.027		7.96627	518.41	275.6		7.96627	585.481	301.247		7.96627	616.039	296.976		7.96627
									8.0754	531.117	297.682		8.0754	539.666	296.817		8.0754	626.4	305.072		8.0754	544.736	305.158		8.0754	555.711	294.651		8.0754	595.314	283.03		8.0754	526.348	268.041		8.0754	516.003	277.354		8.0754	587.609	294.206		8.0754	623.568	301.877		8.0754
																					8.18452	532.448	301.127		8.18452	548.945	285.514		8.18452	575.741	275.39		8.18452	531.554	283.607		8.18452	495.843	274.384		8.18452	598.622	293.911		8.18452	616.767	301.856		8.18452
																					8.29365	520.792	301.045		8.29365	538.343	277.731		8.29365	550.677	275.333		8.29365	521.543	277.496		8.29365	500.128	277.717		8.29365	584.299	284.106		8.29365	634.458	308.945		8.29365
																									8.40278	541.249	275.489		8.40278	556.142	278.496						8.40278	496.718	282.75		8.40278	593.365	298.551		8.40278	653.895	295.912		8.40278
																													8.5119	567.855	281.329						8.5119	507.609	279.445		8.5119	606.4	293.636		8.5119	676.208	300.276		8.5119
																													8.62103	600.029	274.13
MIN		412.843	277.221			444.138	272.464			438.994	276.321			464.529	270.757			461.224	276.294			497.674	267.628			449.427	262.495			458.221	266.156			447.759	263.582			479.517	259.049			466.327	271.846			494.358	277.263
MAX		656.475	311.634			673.106	307.493			628.833	321.272			714.051	307.527			752.092	362.214			730.891	332.081			744.049	309.371			713.078	329.236			766.688	294.464			740.103	318.655			767.665	321.743			763.922	328.289
TOTAL MIN		392.689	249.463
TOTAL MAX		829.71	381.185
both Rab7 and Snx1 normalised for individual min-max
	0	0.449235	0.662498		0	0.358238	0.389857		0	0.536212	0.543753		0	0.312497	0.677969		0	0.611501	0.409014		0	0.110961	0.451609		0	0.315462	0.233387		0	0.582276	0.165859		0	0.233654	0.552476		0	0.109561	0.299789		0	0.462295	0.455659		0	0.736578	0.427702		0
	0.10913	0.493478	0.661539		0.10913	0.288809	0.394407		0.10913	0.62316	0.674301		0.10913	0.35253	0.494478		0.10913	0.638541	0.893865		0.10913	0.147365	0.393871		0.10913	0.297924	0.190421		0.10913	0.554758	0.325694		0.10913	0.210896	0.831005		0.10913	0.124869	0.217591		0.10913	0.459922	0.300273		0.10913	0.857273	0.277492		0.10913
	0.21825	0.488618	0.145235		0.21825	0.232198	0.479229		0.21825	0.683611	0.425013		0.21825	0.35437	0.326458		0.21825	0.617541	1		0.21825	0.214474	0.318376		0.21825	0.35442	0.270715		0.21825	0.544698	0.485336		0.21825	0.209987	0.892678		0.21825	0.124784	0.137825		0.21825	0.523439	0.300725		0.21825	0.858538	0.484144		0.21825
	0.32738	0.502069	0.103379		0.32738	0.291442	0.471255		0.32738	0.629065	0.49455		0.32738	0.343769	0.449189		0.32738	0.608723	0.617168		0.32738	0.303125	0.266977		0.32738	0.368958	0.409345		0.32738	0.564642	0.772234		0.32738	0.214775	0.837513		0.32738	0.104633	0.227164		0.32738	0.606326	0.518931		0.32738	0.842824	0.580423		0.32738
	0.43651	0.479342	0.690967		0.43651	0.298374	0.314742		0.43651	0.748782	0.557223		0.43651	0.372969	0.529955		0.43651	0.517864	0.371694		0.43651	0.337085	0.230507		0.43651	0.355544	0.492751		0.43651	0.568727	1		0.43651	0.250868	0.821957		0.43651	0.127885	0.248534		0.43651	0.729666	0.391639		0.43651	0.737432	0.666401		0.43651
	0.54563	0.394792	0.502387		0.54563	0.251555	0.675772		0.54563	0.719315	0.743655		0.54563	0.366196	0.647333		0.54563	0.453769	0.370901		0.54563	0.398341	0.238961		0.54563	0.350181	0.714768		0.54563	0.498597	0.921355		0.54563	0.248441	0.253686		0.54563	0.146148	0.282023		0.54563	0.724618	0.494769		0.54563	0.661401	0.616508		0.54563
	0.65476	0.420363	0.711177		0.65476	0.34438	0.427991		0.65476	0.716734	0.983504		0.65476	0.33371	0.591207		0.65476	0.33672	0.283302		0.65476	0.482709	0.342906		0.65476	0.450075	0.653825		0.65476	0.448338	0.690653		0.65476	0.201938	0.873755		0.65476	0.159705	0.274745		0.65476	0.826056	0.642508		0.65476	0.597873	0.58027		0.65476
	0.76389	0.336105	0.879351		0.76389	0.223088	0.429339		0.76389	0.632562	0.666096		0.76389	0.299757	0.458903		0.76389	0.287316	0.176616		0.76389	0.493536	0.189595		0.76389	0.401236	0.424276		0.76389	0.412737	0.486037		0.76389	0.228004	0.866129		0.76389	0.239337	0.135053		0.76389	0.777977	0.300513		0.76389	0.563191	0.628647		0.76389
	0.87302	0.316206	1		0.87302	0.306877	0.195983		0.87302	0.604697	0.663102		0.87302	0.256947	0.334576		0.87302	0.291754	0.278285		0.87302	0.37177	0.173976		0.87302	0.382463	0.503716		0.87302	0.435507	0.460726		0.87302	0.254775	0.898432		0.87302	0.234602	0.0852337		0.87302	0.736426	0.377207		0.87302	0.554807	0.53446		0.87302
	0.98214	0.369529	0.724372		0.98214	0.255106	0.227643		0.98214	0.586613	0.63936		0.98214	0.230012	0.16518		0.98214	0.254799	0.349608		0.98214	0.346767	0.210209		0.98214	0.407821	0.363264		0.98214	0.416634	0.289851		0.98214	0.26662	0.556086		0.98214	0.227004	0.316182		0.98214	0.768619	0.498323		0.98214	0.614496	0.520747		0.98214
	1.09127	0.463268	0.645835		1.09127	0.227075	0.117577		1.09127	0.618903	0.66532		1.09127	0.275318	0.366564		1.09127	0.215826	0.263807		1.09127	0.234194	0.286451		1.09127	0.423224	0.390587		1.09127	0.446474	0.228771		1.09127	0.24222	0.424951		1.09127	0.247884	0.478506		1.09127	0.796637	0.356829		1.09127	0.652046	0.479786		1.09127
	1.2004	0.415996	0.839035		1.2004	0.280677	0.353576		1.2004	0.583157	0.527417		1.2004	0.344431	0.299798		1.2004	0.179683	0.317619		1.2004	0.238782	0.343767		1.2004	0.467816	0.420474		1.2004	0.38759	0.305897		1.2004	0.288861	0.505183		1.2004	0.269224	0.459003		1.2004	0.799574	0.623132		1.2004	0.582878	0.371027		1.2004
	1.30952	0.481181	0.892872		1.30952	0.256254	0.0631505		1.30952	0.577321	0.476897		1.30952	0.308442	0.222585		1.30952	0.147483	0.415094		1.30952	0.209063	0.301997		1.30952	0.416279	0.54741		1.30952	0.371742	0.139177		1.30952	0.289557	0.311011		1.30952	0.337935	0.27838		1.30952	0.818446	0.649428		1.30952	0.521338	0.397243		1.30952
	1.41865	0.48414	0.86615		1.41865	0.289669	0.109061		1.41865	0.55556	0.522173		1.41865	0.299372	0.668497		1.41865	0.137894	0.340211		1.41865	0.151777	0.264494		1.41865	0.406599	0.479378		1.41865	0.373621	0.203651		1.41865	0.310339	0.355713		1.41865	0.336423	0.326881		1.41865	0.765725	0.503948		1.41865	0.516156	0.515328		1.41865
	1.52778	0.50527	0.760216		1.52778	0.170238	0.473019		1.52778	0.518229	0.325334		1.52778	0.231687	0.595907		1.52778	0.100492	0.378036		1.52778	0.168234	0.031072		1.52778	0.443667	0.230876		1.52778	0.416159	0.11588		1.52778	0.331782	0.350895		1.52778	0.359225	0.392459		1.52778	0.677976	0.387013		1.52778	0.464736	0.536849		1.52778
	1.6369	0.407693	0.685454		1.6369	0.167674	0		1.6369	0.485864	0.546013		1.6369	0.258931	0.55127		1.6369	0.19154	0.221589		1.6369	0.146597	0.236548		1.6369	0.401219	0.262933		1.6369	0.396458	0.0656848		1.6369	0.379156	0.395866		1.6369	0.465459	0.414453		1.6369	0.688204	0.553166		1.6369	0.459409	0.453717		1.6369
	1.74603	0.368511	0.859954		1.74603	0.0785568	0.0694368		1.74603	0.425208	0.523735		1.74603	0.168931	0.313986		1.74603	0.169445	0.248344		1.74603	0.111368	0.417764		1.74603	0.436254	0.185897		1.74603	0.43165	0.0562809		1.74603	0.355239	0.595566		1.74603	0.510119	0.600174		1.74603	0.614035	0.541199		1.74603	0.370276	0.570655		1.74603
	1.85516	0.38254	0.573442		1.85516	0.0814481	0.174752		1.85516	0.399302	0.576678		1.85516	0.190813	0.653066		1.85516	0.144571	0.16939		1.85516	0.0602186	0.300239		1.85516	0.46728	0.379004		1.85516	0.502662	0.144948		1.85516	0.415183	0.566898		1.85516	0.591878	0.648014		1.85516	0.55015	0.470924		1.85516	0.376067	0.777219		1.85516
	1.96429	0.364948	0.662309		1.96429	0.0737046	0.232233		1.96429	0.402272	0.660706		1.96429	0.172021	0.597511		1.96429	0.189938	0.202071		1.96429	0.075076	0.333624		1.96429	0.504012	0.502795		1.96429	0.465759	0.280339		1.96429	0.399277	0.360039		1.96429	0.619653	0.90083		1.96429	0.458439	0.547937		1.96429	0.411884	0.938757		1.96429
	2.07341	0.352979	0.682197		2.07341	0	0.179982		2.07341	0.435706	0.465395		2.07341	0.172017	0.510254		2.07341	0.232858	0.355105		2.07341	0.0586407	0.504952		2.07341	0.500628	0.491565		2.07341	0.451865	0.315268		2.07341	0.425687	0.233558		2.07341	0.641957	1		2.07341	0.425227	0.787935		2.07341	0.382047	0.979652		2.07341
	2.18254	0.401589	0.645516		2.18254	0.076526	0.453467		2.18254	0.450218	1		2.18254	0.170474	0.926289		2.18254	0.206826	0.26129		2.18254	0.0059301	0.579065		2.18254	0.435965	0.457819		2.18254	0.475125	0.273691		2.18254	0.376303	0.701618		2.18254	0.627125	0.897974		2.18254	0.389128	0.659352		2.18254	0.449556	0.839217		2.18254
	2.29167	0.477823	0.641055		2.29167	0.0882831	0.712498		2.29167	0.368101	0.904446		2.29167	0.182649	0.637837		2.29167	0.206169	0.160287		2.29167	0	0.722254		2.29167	0.373003	0.459442		2.29167	0.465437	0.289968		2.29167	0.434802	0.408822		2.29167	0.584172	0.708175		2.29167	0.350391	0.606421		2.29167	0.470467	0.822784		2.29167
	2.40079	0.459431	0.719055		2.40079	0.169233	0.532268		2.40079	0.385305	0.884393		2.40079	0.107129	0.606061		2.40079	0.101214	0.0981941		2.40079	0.0136397	0.87484		2.40079	0.294995	0.608131		2.40079	0.4756	0.421527		2.40079	0.452	0.641984		2.40079	0.628844	0.613368		2.40079	0.389712	0.670882		2.40079	0.464617	0.857998		2.40079
	2.50992	0.408054	0.730289		2.50992	0.108207	0.620492		2.50992	0.265741	0.852279		2.50992	0.0463767	0.635068		2.50992	0.0989865	0.0770662		2.50992	0.0532208	0.93843		2.50992	0.236265	0.629094		2.50992	0.501501	0.426568		2.50992	0.444553	0.578054		2.50992	0.608502	0.62426		2.50992	0.425147	0.795601		2.50992	0.486437	0.929471		2.50992
	2.61905	0.385955	0.511808		2.61905	0.111129	0.530917		2.61905	0.263987	0.58066		2.61905	0.0885613	0.823871		2.61905	0.149408	0.15625		2.61905	0.134626	0.842214		2.61905	0.168229	0.570741		2.61905	0.587918	0.406622		2.61905	0.528453	0.746968		2.61905	0.513293	0.611106		2.61905	0.494116	0.958605		2.61905	0.499644	0.868083		2.61905
	2.72817	0.413722	0.674917		2.72817	0.142059	0.387893		2.72817	0.319339	0.653798		2.72817	0.146713	1		2.72817	0.0901784	0.209567		2.72817	0.177526	0.951607		2.72817	0.177875	0.466476		2.72817	0.725379	0.418513		2.72817	0.667772	1		2.72817	0.476054	0.514429		2.72817	0.575855	0.910955		2.72817	0.51137	0.754583		2.72817
	2.8373	0.449383	0.549209		2.8373	0.15365	0.519198		2.8373	0.28561	0.782676		2.8373	0.108652	0.859423		2.8373	0.135223	0.130704		2.8373	0.306564	0.88474		2.8373	0.234147	0.582719		2.8373	0.872701	0.352939		2.8373	0.846684	0.815206		2.8373	0.434336	0.549944		2.8373	0.59869	1		2.8373	0.583743	0.851632		2.8373
	2.94643	0.495986	0.488102		2.94643	0.195966	0.628228		2.94643	0.296219	0.787715		2.94643	0.163705	0.801081		2.94643	0.130901	0.222266		2.94643	0.223444	1		2.94643	0.336672	0.552207		2.94643	0.977211	0.39559		2.94643	0.988725	0.81041		2.94643	0.451509	0.637364		2.94643	0.593224	0.937912		2.94643	0.615349	0.873241		2.94643
	3.05556	0.587809	0.689877		3.05556	0.236631	0.701028		3.05556	0.396573	0.602818		3.05556	0.150203	0.878749		3.05556	0.149996	0.291377		3.05556	0.228598	0.985906		3.05556	0.394068	0.749259		3.05556	1	0.394843		3.05556	1	0.723942		3.05556	0.486611	0.732297		3.05556	0.601102	0.930349		3.05556	0.687002	0.911255		3.05556
	3.16468	0.655558	0.58877		3.16468	0.285848	0.757661		3.16468	0.380227	0.616488		3.16468	0.208615	0.807287		3.16468	0.282437	0.173229		3.16468	0.319758	0.644416		3.16468	0.495503	0.578201		3.16468	0.897056	0.416544		3.16468	0.958279	0.863791		3.16468	0.540881	0.775106		3.16468	0.567745	0.876626		3.16468	0.781202	1		3.16468
	3.27381	0.720221	0.79386		3.27381	0.33803	0.87777		3.27381	0.42329	0.62734		3.27381	0.248663	0.943199		3.27381	0.351651	0.155373		3.27381	0.331618	0.569112		3.27381	0.540981	0.768204		3.27381	0.853349	0.499161		3.27381	0.878888	0.665506		3.27381	0.677738	0.659273		3.27381	0.664443	0.619182		3.27381	0.76853	0.826365		3.27381
	3.38294	0.80136	0.590673		3.38294	0.419491	0.72277		3.38294	0.527552	0.556193		3.38294	0.241626	0.961828		3.38294	0.384243	0.178434		3.38294	0.255346	0.479134		3.38294	0.517891	0.651566		3.38294	0.687193	0.456237		3.38294	0.7881	0.482846		3.38294	0.825708	0.519663		3.38294	0.789446	0.715841		3.38294	0.842798	0.876179		3.38294
	3.49206	0.788123	0.699992		3.49206	0.501668	0.854306		3.49206	0.566069	0.831679		3.49206	0.299962	0.908952		3.49206	0.424715	0.0474828		3.49206	0.319192	0.307412		3.49206	0.421727	0.735772		3.49206	0.652205	0.553205		3.49206	0.730605	0.500607		3.49206	0.971211	0.731127		3.49206	0.912421	0.743365		3.49206	0.945883	0.893609		3.49206
	3.60119	0.773022	0.60221		3.60119	0.627952	0.925987		3.60119	0.663741	0.708855		3.60119	0.322897	0.715213		3.60119	0.527896	0.0276514		3.60119	0.315865	0.432223		3.60119	0.406124	0.639475		3.60119	0.548504	0.583743		3.60119	0.626252	0.523235		3.60119	1	0.717914		3.60119	0.991661	0.649903		3.60119	1	0.665121		3.60119
	3.71032	0.757663	0.713458		3.71032	0.6096	0.837897		3.71032	0.797386	0.526358		3.71032	0.349436	0.824542		3.71032	0.528054	0.266385		3.71032	0.273758	0.370685		3.71032	0.38714	0.464667		3.71032	0.491162	0.498096		3.71032	0.551377	0.676114		3.71032	0.924205	0.586122		3.71032	1	0.433687		3.71032	0.930636	0.328498		3.71032
	3.81944	0.655973	0.609251		3.81944	0.547937	0.745648		3.81944	0.811819	0.468289		3.81944	0.452694	0.894919		3.81944	0.519988	0.207546		3.81944	0.274671	0.385752		3.81944	0.378193	0.336445		3.81944	0.441938	0.497938		3.81944	0.548194	0.483623		3.81944	0.89283	0.670079		3.81944	0.898851	0.421578		3.81944	0.920531	0.432533		3.81944
	3.92857	0.547313	0.612046		3.92857	0.539748	0.880391		3.92857	0.851132	0.497566		3.92857	0.504689	0.756301		3.92857	0.484722	0.0734524		3.92857	0.238212	0.408786		3.92857	0.388189	0.404948		3.92857	0.524526	0.413202		3.92857	0.519319	0.232353		3.92857	0.639052	0.512183		3.92857	0.837993	0.337323		3.92857	0.837456	0.179264		3.92857
	4.0377	0.429804	0.564698		4.0377	0.505175	0.783988		4.0377	0.864243	0.327743		4.0377	0.472147	0.578713		4.0377	0.390108	0.0334894		4.0377	0.156052	0.215054		4.0377	0.370176	0.256557		4.0377	0.551988	0.381612		4.0377	0.544701	0.196167		4.0377	0.564977	0.35227		4.0377	0.71384	0.203381		4.0377	0.879012	0.00552856		4.0377
	4.14683	0.345476	0.471355		4.14683	0.351818	0.769385		4.14683	0.835397	0.121908		4.14683	0.486771	0.663982		4.14683	0.284046	0.115908		4.14683	0.170249	0.141288		4.14683	0.351637	0.175561		4.14683	0.509344	0.257651		4.14683	0.610045	0.0977012		4.14683	0.639831	0.233247		4.14683	0.617045	0.229016		4.14683	0.869393	0.0804199		4.14683
	4.25595	0.249799	0.31819		4.25595	0.24272	0.643784		4.25595	0.739284	0.237793		4.25595	0.476114	0.649474		4.25595	0.25109	0.188089		4.25595	0.202704	0.138535		4.25595	0.348175	0.110204		4.25595	0.518291	0.252099		4.25595	0.634834	0.237035		4.25595	0.596325	0.220097		4.25595	0.582154	0.219568		4.25595	0.780397	0.194778		4.25595
	4.36508	0.196813	0.262205		4.36508	0.106316	0.872611		4.36508	0.6642	0.573675		4.36508	0.41533	0.720245		4.36508	0.202288	0.145905		4.36508	0.172449	0.172381		4.36508	0.300833	0.218324		4.36508	0.525911	0.177942		4.36508	0.654732	0.391595		4.36508	0.546491	0.273483		4.36508	0.564526	0.349145		4.36508	0.869204	0.0638009		4.36508
	4.47421	0.160299	0.796098		4.47421	0.0990313	0.982357		4.47421	0.421936	0.529648		4.47421	0.320573	0.87264		4.47421	0.12417	0.0869289		4.47421	0.210997	0.184936		4.47421	0.225489	0.289185		4.47421	0.486563	0.240526		4.47421	0.583575	0.531243		4.47421	0.60727	0.437963		4.47421	0.488262	0.0961461		4.47421	0.885107	0.221431		4.47421
	4.58333	0.063637	0.4372		4.58333	0.0216668	0.926741		4.58333	0.258493	0.372362		4.58333	0.171123	0.986549		4.58333	0.131668	0.1267		4.58333	0.149818	0.202851		4.58333	0.161709	0.190046		4.58333	0.472167	0.332243		4.58333	0.475629	0.536175		4.58333	0.613206	0.403946		4.58333	0.415679	0.0583923		4.58333	0.784062	0.0940072		4.58333
	4.69246	0.0368383	0.410335		4.69246	0.00932445	0.862454		4.69246	0.164834	0.610121		4.69246	0.17237	0.661402		4.69246	0.144942	0.124707		4.69246	0.173349	0.320057		4.69246	0.073243	0.214058		4.69246	0.534398	0.365763		4.69246	0.271741	0.44857		4.69246	0.607431	0.367152		4.69246	0.224635	0.0677115		4.69246	0.611272	0		4.69246
	4.80159	0.00920651	0.497424		4.80159	0.0244183	0.675854		4.80159	0.238318	0.293239		4.80159	0.0823655	0.407977		4.80159	0.113842	0.0271929		4.80159	0.2356	0.232029		4.80159	0.0581593	0.175488		4.80159	0.486018	0.396135		4.80159	0.166197	0.546741		4.80159	0.561669	0.564471		4.80159	0.232135	0.50295		4.80159	0.492106	0.0476209		4.80159
	4.91071	0.0425355	0.52104		4.91071	0.0524658	0.644423		4.91071	0.163196	0.239384		4.91071	0.00960236	0.431284		4.91071	0.0393202	0.0555065		4.91071	0.341849	0.229263		4.91071	0.0200291	0.199829		4.91071	0.340979	0.268236		4.91071	0.0774279	0.60496		4.91071	0.387688	0.492394		4.91071	0.129327	0.363553		4.91071	0.29048	0.181134		4.91071
	5.01984	0	0.379876		5.01984	0.0333584	0.60527		5.01984	0.16515	0.0690316		5.01984	0	0.643662		5.01984	0	0.125488		5.01984	0.434145	0.210972		5.01984	0.0195165	0.122505		5.01984	0.181474	0.228906		5.01984	0.091939	0.502045		5.01984	0.353039	0.489077		5.01984	0.0419861	0.164896		5.01984	0.173217	0.176171		5.01984
	5.12897	0.0665799	0.115755		5.12897	0.183082	0.390165		5.12897	0.110894	0.102417		5.12897	0.037668	0.696119		5.12897	0.0148005	0.121183		5.12897	0.498844	0.259244		5.12897	0	0.0348105		5.12897	0	0.268935		5.12897	0.0614118	0.570966		5.12897	0.242714	0.435985		5.12897	0.00779855	0.292791		5.12897	0.0828931	0.376025		5.12897
	5.2381	0.118642	0.281933		5.2381	0.267928	0.337792		5.2381	0.0944643	0.350744		5.2381	0.0769632	0.437044		5.2381	0.0826904	0.0634337		5.2381	0.536072	0.22216		5.2381	0.0408727	0.0870072		5.2381	0.0196934	0.176928		5.2381	0.154671	0.417193		5.2381	0.106625	0.679135		5.2381	0.00124445	0.091737		5.2381	0	0.442101		5.2381
	5.34722	0.154089	0.454772		5.34722	0.365798	0.523298		5.34722	0.0686108	0.264705		5.34722	0.109305	0.0238124		5.34722	0.195119	0.0425165		5.34722	0.552168	0.0773937		5.34722	0.103261	0.0200505		5.34722	0.0786637	0.148269		5.34722	0.288365	0.00791726		5.34722	0.00957841	0.536346		5.34722	3.98224e-05	0.0433894		5.34722	0.0475249	0.248538		5.34722
	5.45635	0.106213	0.0903057		5.45635	0.348953	0.506223		5.45635	0.0131427	0.391191		5.45635	0.11379	0		5.45635	0.319953	0.022634		5.45635	0.626755	0.0172744		5.45635	0.1917	0.177901		5.45635	0.124423	0.247854		5.45635	0.252028	0.0427856		5.45635	0.0446686	0.640424		5.45635	0.0164765	0		5.45635	0.109202	0.304012		5.45635
	5.56548	0.0955704	0.305163		5.56548	0.282009	0.683511		5.56548	0	0.288776		5.56548	0.13507	0.4702		5.56548	0.432179	0.00802378		5.56548	0.672232	0		5.56548	0.2884	0.208735		5.56548	0.200148	0.249569		5.56548	0.163184	0.00309243		5.56548	0	0.552798		5.56548	0.0109346	0.0665751		5.56548	0.0672827	0.298182		5.56548
	5.6746	0.09108	0.379135		5.6746	0.222407	1		5.6746	0.00185947	0.130586		5.6746	0.101346	0.492145		5.6746	0.425805	0.0959839		5.6746	0.640605	0.31391		5.6746	0.334798	0.350591		5.6746	0.317723	0.139575		5.6746	0.0582104	0.371383		5.6746	0.0539169	0.617718		5.6746	0.0107355	0.110419		5.6746	0.0202661	0.189461		5.6746
	5.78373	0.123297	0		5.78373	0.150008	0.878318		5.78373	0.124026	0		5.78373	0.23741	0.255812		5.78373	0.441675	0.00976378		5.78373	0.634405	0.432199		5.78373	0.275237	0.0765435		5.78373	0.37696	0.0690013		5.78373	0.0135077	0.566244		5.78373	0.140111	0.55672		5.78373	0.000305305	0.297274		5.78373	0.0247882	0.105931		5.78373
	5.89286	0.21583	0.1745		5.89286	0.142749	0.406635		5.89286	0.142489	0.0870404		5.89286	0.254615	0.340997		5.89286	0.551419	0.0519777		5.89286	0.626678	0.489599		5.89286	0.253138	0.12598		5.89286	0.389152	0.0550587		5.89286	0	0.623035		5.89286	0.275161	0.648626		5.89286	0.0115219	0.232064		5.89286	0.0374865	0.309419		5.89286
	6.00198	0.342131	0.228506		6.00198	0.300985	0.383465		6.00198	0.295809	0.0514701		6.00198	0.311924	0.537137		6.00198	0.532884	0.203647		6.00198	0.694049	0.626345		6.00198	0.343053	0.24797		6.00198	0.388665	0.0541075		6.00198	0.00534602	0.696839		6.00198	0.361999	0.454119		6.00198	0	0.218352		6.00198	0.0801925	0.191965		6.00198
	6.11111	0.55049	0.16589		6.11111	0.36154	0.489035		6.11111	0.429711	0.117156		6.11111	0.405804	0.0995657		6.11111	0.505604	0.199486		6.11111	0.75934	0.78133		6.11111	0.359298	0.415918		6.11111	0.34045	0.200924		6.11111	0.090343	0.757062		6.11111	0.354643	0.446541		6.11111	0.0452416	0.301473		6.11111	0.102566	0.26414		6.11111
	6.22024	0.657533	0.476109		6.22024	0.400108	0.649602		6.22024	0.52819	0.221733		6.22024	0.531693	0.56876		6.22024	0.579479	0.197296		6.22024	0.782164	0.892543		6.22024	0.383383	0.102625		6.22024	0.351075	0.0740504		6.22024	0.156336	0.965501		6.22024	0.313098	0.605198		6.22024	0.0330094	0.506313		6.22024	0.140764	0.425611		6.22024
	6.32937	0.816317	0.321142		6.32937	0.444988	0.488701		6.32937	0.647433	0.328691		6.32937	0.599302	0.183562		6.32937	0.610139	0.152717		6.32937	0.730268	0.853487		6.32937	0.327019	0.0102994		6.32937	0.431611	0.235883		6.32937	0.291454	0.704636		6.32937	0.336653	0.4053		6.32937	0.082814	0.44465		6.32937	0.189725	0.498802		6.32937
	6.43849	1	0.364998		6.43849	0.467436	0.597608		6.43849	0.743746	0.0991916		6.43849	0.553602	0.143299		6.43849	0.682925	0.0742613		6.43849	0.629358	0.658649		6.43849	0.349298	0		6.43849	0.466666	0.299822		6.43849	0.447432	0.477344		6.43849	0.3278	0.487809		6.43849	0.136139	0.367974		6.43849	0.304837	0.36534		6.43849
	6.54762	0.964405	0.323362		6.54762	0.501157	0.542251		6.54762	0.69127	0.0598393		6.54762	0.579528	0.391339		6.54762	0.819162	0.0566018		6.54762	0.570319	0.5942		6.54762	0.399071	0.0527086		6.54762	0.522795	0.22987		6.54762	0.56311	0.442317		6.54762	0.410855	0.409244		6.54762	0.305577	0.323258		6.54762	0.348377	0.583206		6.54762
	6.65675	0.849482	0.500719		6.65675	0.561218	0.366496		6.65675	0.721164	0.133527		6.65675	0.579997	0.370836		6.65675	0.910568	0.0542461		6.65675	0.573637	0.527306		6.65675	0.450669	0.236864		6.65675	0.575225	0.223656		6.65675	0.672752	0.180284		6.65675	0.403748	0.648113		6.65675	0.343123	0.299066		6.65675	0.516412	0.534093		6.65675
	6.76587	0.778802	0.684951		6.76587	0.578146	0.412244		6.76587	0.731256	0.00862729		6.76587	0.659068	0.208756		6.76587	0.909911	0.168887		6.76587	0.584859	0.302757		6.76587	0.53085	0.261201		6.76587	0.5672	0.259983		6.76587	0.68788	0		6.76587	0.438362	0.380758		6.76587	0.449811	0.478337		6.76587	0.696751	0.416496		6.76587
	6.875	0.615658	0.950388		6.875	0.689184	0.483576		6.875	0.818478	0.242022		6.875	0.71677	0.353779		6.875	0.89323	0		6.875	0.601015	0.168014		6.875	0.550176	0.395005		6.875	0.595934	0.0251855		6.875	0.635947	0.128311		6.875	0.418683	0.379373		6.875	0.454413	0.650001		6.875	0.777025	0.237548		6.875
	6.98413	0.48918	0.692536		6.98413	0.773654	0.591176		6.98413	0.898725	0.186443		6.98413	0.848082	0.327057		6.98413	0.883325	0.0605229		6.98413	0.598708	0.144312		6.98413	0.590767	0.310419		6.98413	0.605139	0.13036		6.98413	0.570578	0.0872582		6.98413	0.449019	0.324906		6.98413	0.510463	0.734559		6.98413	0.817643	0.273234		6.98413
	7.09325	0.368761	0.601843		7.09325	0.950644	0.578261		7.09325	1	0.31698		7.09325	0.918464	0.47571		7.09325	0.893333	0.0601434		7.09325	0.605916	0.212362		7.09325	0.730848	0.391027		7.09325	0.708852	0.135144		7.09325	0.595584	0.214226		7.09325	0.455942	0.223781		7.09325	0.578533	0.551159		7.09325	0.931222	0.316596		7.09325
	7.20238	0.345542	0.508161		7.20238	1	0.726395		7.20238	0.921049	0.368762		7.20238	1	0.44496		7.20238	0.89366	0.0448024		7.20238	0.692274	0.142825		7.20238	0.82575	0.194965		7.20238	0.822069	0		7.20238	0.607568	0.551384		7.20238	0.445362	0.127367		7.20238	0.627654	0.437235		7.20238	0.866944	0.229719		7.20238
	7.31151	0.317877	0.579669		7.31151	0.899562	0.541072		7.31151	0.798018	0.289726		7.31151	0.993784	0.575842		7.31151	0.991102	0.100805		7.31151	0.80537	0.243625		7.31151	0.884968	0.462822		7.31151	0.817682	0.0236509		7.31151	0.634176	0.346187		7.31151	0.455377	0.018703		7.31151	0.564562	0.237892		7.31151	0.7797	0.332184		7.31151
	7.42063	0.265663	0.711938		7.42063	0.621982	0.360033		7.42063	0.703027	0.288709		7.42063	0.879958	0.472074		7.42063	1	0.19632		7.42063	0.985983	0.354536		7.42063	1	0.737993		7.42063	0.793398	0.177408		7.42063	0.569459	0.21148		7.42063	0.386648	0.0916694		7.42063	0.452173	0.426294		7.42063	0.666981	0.153546		7.42063
	7.52976	0.269386	0.446775		7.52976	0.508145	0.58495		7.52976	0.714579	0.279079		7.52976	0.725423	0.445697		7.52976	0.96385	0.209958		7.52976	1	0.309779		7.52976	0.962006	0.716963		7.52976	0.867545	0.288646		7.52976	0.491197	0.315029		7.52976	0.304352	0		7.52976	0.399034	0.28132		7.52976	0.572821	0.171715		7.52976
	7.63889	0.333425	0.533041		7.63889	0.295513	0.68087		7.63889	0.496194	0.2901		7.63889	0.555943	0.423073		7.63889	0.8573	0.0538969		7.63889	0.851452	0.444666		7.63889	0.863357	0.979275		7.63889	0.951322	0.375022		7.63889	0.424935	0.323244		7.63889	0.228827	0.0907081		7.63889	0.439178	0.284725		7.63889	0.502408	0.243188		7.63889
	7.74802	0.430797	0.588296		7.74802	0.281747	0.460301		7.74802	0.410685	0.599129		7.74802	0.39106	0.747723		7.74802	0.820726	0.124662		7.74802	0.63651	0.456743		7.74802	0.675017	1		7.74802	0.879375	0.258362		7.74802	0.302572	0.164462		7.74802	0.174572	0.0581574		7.74802	0.355126	0.408002		7.74802	0.492429	0.241328		7.74802
					7.85714	0.323997	0.354683		7.85714	0.462892	0.538485		7.85714	0.301609	0.656599		7.85714	0.664497	0.1058		7.85714	0.42743	0.40327		7.85714	0.528358	0.837115		7.85714	0.797875	0.253608		7.85714	0.324514	0.596252		7.85714	0.200513	0.197376		7.85714	0.389941	0.466497		7.85714	0.479318	0.169373		7.85714
									7.96627	0.508937	0.41837		7.96627	0.342202	0.482254		7.96627	0.530725	0.126113		7.96627	0.245171	0.618732		7.96627	0.395218	0.710753		7.96627	0.653873	0.1615		7.96627	0.260321	0.435365		7.96627	0.149252	0.277667		7.96627	0.395416	0.58924		7.96627	0.451399	0.386335		7.96627
									8.0754	0.485269	0.475199		8.0754	0.301124	0.708711		8.0754	0.567873	0.334935		8.0754	0.201795	0.582282		8.0754	0.360747	0.685982		8.0754	0.537921	0.267511		8.0754	0.246415	0.144373		8.0754	0.140015	0.307097		8.0754	0.402478	0.448133		8.0754	0.47933	0.482392		8.0754
																					8.18452	0.149106	0.51974		8.18452	0.337782	0.491066		8.18452	0.461121	0.146393		8.18452	0.262739	0.648425		8.18452	0.0626511	0.257275		8.18452	0.439025	0.442215		8.18452	0.4541	0.481965		8.18452
																					8.29365	0.0991266	0.518464		8.29365	0.301797	0.325021		8.29365	0.362776	0.145485		8.29365	0.231349	0.450552		8.29365	0.0790948	0.313194		8.29365	0.391494	0.245708		8.29365	0.519728	0.62091		8.29365
																									8.40278	0.31166	0.277204		8.40278	0.384219	0.195633						8.40278	0.0660089	0.397634		8.40278	0.42158	0.535217		8.40278	0.591833	0.365477		8.40278
																													8.5119	0.430178	0.240533						8.5119	0.107803	0.342175		8.5119	0.464837	0.4367		8.5119	0.674608	0.451006		8.5119
																													8.62103	0.556422	0.126414
[truncated: 71 more columns]

## Sheet: exp1 endosome3
frame #	52				53				54				55				56				57				58				59				60				61				62				63				64
line profiles		Rab7	Snx1			Rab7	Snx1			Rab7	Snx1			Rab7	Snx1			Rab7	Snx1			Rab7	Snx1			Rab7	Snx1			Rab7	Snx1			Rab7	Snx1			Rab7	Snx1			Rab7	Snx1			Rab7	Snx1
	0	212.713	258.058		0	224.951	260.719		0	233.532	262.124		0	220.894	257.292		0	209.318	272.302		0	217.427	258.753		0	235.073	264.861		0	240.078	260.954		0	250.39	270.985		0	240.129	245.657		0	240.811	268.841		0	234.17	244.925		0
	0.10913	216.207	263.244		0.10913	231.11	271.829		0.10913	233.115	256.82		0.10913	226.457	275.011		0.10913	207.78	275.088		0.10913	210.486	260.698		0.10913	228.849	271.331		0.10913	233.949	252.845		0.10913	236.618	268.707		0.10913	258.456	246.541		0.10913	236.169	276.422		0.10913	233.859	240.158		0.10913
	0.21825	223.508	269.998		0.21825	244.611	270.967		0.21825	239.508	253.984		0.21825	237.344	266.424		0.21825	213.756	284.082		0.21825	210.841	264.068		0.21825	236.662	265.8		0.21825	229.505	256.245		0.21825	234.936	262.547		0.21825	265.731	244.535		0.21825	234.329	271.32		0.21825	237.126	246.176		0.21825
	0.32738	231.045	257.477		0.32738	254.65	273.598		0.32738	240.964	259.403		0.32738	235.712	263.332		0.32738	216.608	282.474		0.32738	213.166	264.703		0.32738	237.91	269.685		0.32738	225.155	252.353		0.32738	230.506	263.637		0.32738	258.671	251.495		0.32738	232.139	258.988		0.32738	238.8	249.03		0.32738
	0.43651	231.075	258.475		0.43651	270.699	278.875		0.43651	249.701	260.022		0.43651	238.396	265.129		0.43651	215.578	282.04		0.43651	211.56	264.271		0.43651	233.481	273.149		0.43651	221.427	253.024		0.43651	232.942	259.118		0.43651	259.256	248.089		0.43651	234.191	264.104		0.43651	242.443	254.775		0.43651
	0.54563	239.083	256.362		0.54563	269.06	275.743		0.54563	249.15	260.763		0.54563	260.126	261.095		0.54563	219.033	282.429		0.54563	219.041	266.904		0.54563	227.673	278.377		0.54563	225.85	261.465		0.54563	230.398	270.235		0.54563	239.851	240.718		0.54563	222.912	266.71		0.54563	241.486	254.053		0.54563
	0.65476	234.839	261.4		0.65476	259.338	272.699		0.65476	255.788	264.499		0.65476	264.768	259.653		0.65476	224.144	273.192		0.65476	215.739	266.01		0.65476	227.998	278.584		0.65476	219.692	263.403		0.65476	238.13	278.74		0.65476	231.697	237.66		0.65476	217.516	262.661		0.65476	239.604	263.421		0.65476
	0.76389	226.077	267.945		0.76389	261.45	274.43		0.76389	249.214	271.864		0.76389	253.549	262.322		0.76389	235.631	276.284		0.76389	222.353	270.535		0.76389	222.829	275.126		0.76389	220.926	259.151		0.76389	244.077	273.207		0.76389	220.141	253.031		0.76389	219.034	261.506		0.76389	232.885	277.205		0.76389
	0.87302	227.643	274.475		0.87302	261.497	277.169		0.87302	241.661	266.39		0.87302	259.252	263.179		0.87302	242.333	277.905		0.87302	214.04	270.157		0.87302	228.31	273.581		0.87302	215.473	260.532		0.87302	257.69	266.093		0.87302	218.547	254.112		0.87302	216.377	259.681		0.87302	225.379	261.599		0.87302
	0.98214	229.57	279.782		0.98214	254.592	272.23		0.98214	231.912	267.794		0.98214	255.979	262.757		0.98214	251.257	281.805		0.98214	218.446	266.445		0.98214	235.317	271.476		0.98214	221.295	268.699		0.98214	259.666	264.61		0.98214	211.858	261.039		0.98214	210.432	263.523		0.98214	223.801	277.37		0.98214
	1.09127	223.191	290.812		1.09127	259.767	278.845		1.09127	221.593	281.572		1.09127	251.006	265.075		1.09127	242.499	290.039		1.09127	223.476	269.048		1.09127	244.488	277.74		1.09127	221.98	274.144		1.09127	260.62	256.04		1.09127	205.702	266.178		1.09127	209.493	273.258		1.09127	221.473	282.428		1.09127
	1.2004	225.354	290.761		1.2004	254.502	286.409		1.2004	213.669	285.422		1.2004	248.843	264.217		1.2004	251.258	282.165		1.2004	233.494	268.97		1.2004	255.435	273.501		1.2004	234.472	277.935		1.2004	267.384	267.555		1.2004	210.289	270.584		1.2004	214.547	274.438		1.2004	220.8	279.867		1.2004
	1.30952	220.184	295.384		1.30952	250.174	297.197		1.30952	213.383	290.023		1.30952	237.685	268.214		1.30952	259.561	279.165		1.30952	247.358	277.064		1.30952	268.78	270.772		1.30952	235.395	271.859		1.30952	264.874	259.757		1.30952	208.194	265.559		1.30952	216.688	265.202		1.30952	223.629	280.041		1.30952
	1.41865	220.118	297.76		1.41865	236.217	303.524		1.41865	204.907	280.824		1.41865	227.37	267.43		1.41865	246.982	293.941		1.41865	247.516	283.944		1.41865	273.168	276.68		1.41865	234.039	266.973		1.41865	267.625	258.347		1.41865	211.14	267.941		1.41865	221.371	260.538		1.41865	229.91	276.345		1.41865
	1.52778	216.542	299.473		1.52778	239.577	306.157		1.52778	218.295	291.684		1.52778	223.339	273.592		1.52778	251.174	282.249		1.52778	233.195	274.516		1.52778	282.424	281.755		1.52778	242.916	275.205		1.52778	261.777	259.157		1.52778	215.06	264.602		1.52778	220.667	255.58		1.52778	234.105	270.235		1.52778
	1.6369	217.697	303.186		1.6369	236.236	311.036		1.6369	212.629	288.219		1.6369	219.947	282.043		1.6369	268.043	304.554		1.6369	231.792	274.783		1.6369	278.053	294.416		1.6369	263.742	276.386		1.6369	254.245	262.858		1.6369	214.989	260.277		1.6369	222.357	251.803		1.6369	232.186	264.705		1.6369
	1.74603	224.006	304.903		1.74603	224.451	306.016		1.74603	208.848	300.617		1.74603	216.755	274.123		1.74603	258.213	296.311		1.74603	248.387	295.788		1.74603	284.382	283.201		1.74603	266.357	279.389		1.74603	254.462	276.384		1.74603	217.859	262.769		1.74603	222.935	256.222		1.74603	231.217	267.593		1.74603
	1.85516	224.615	306.582		1.85516	222.705	321.327		1.85516	217.103	295.456		1.85516	211.798	281.584		1.85516	238.494	302.29		1.85516	242.734	289.886		1.85516	280.042	269.611		1.85516	270.267	272.176		1.85516	242.657	265.783		1.85516	220.227	265.989		1.85516	236.417	262.308		1.85516	227.649	266.207		1.85516
	1.96429	227.315	300.734		1.96429	230.794	315.599		1.96429	233.21	298.912		1.96429	214.66	290.635		1.96429	234.813	307.486		1.96429	245.036	283.495		1.96429	272.851	274.083		1.96429	274.628	286.311		1.96429	235.07	276.035		1.96429	224.895	273.501		1.96429	233.107	258.229		1.96429	234.064	270.478		1.96429
	2.07341	228.344	301.97		2.07341	233.724	318.493		2.07341	235.299	307.822		2.07341	220.376	283.298		2.07341	235.748	312.675		2.07341	243.45	300.356		2.07341	276.278	278.175		2.07341	266.873	277.397		2.07341	234.997	273.502		2.07341	234.367	276.69		2.07341	230.519	264.677		2.07341	236.034	272.917		2.07341
	2.18254	234.782	297.646		2.18254	242.136	326.169		2.18254	231.702	308.219		2.18254	223.703	287.798		2.18254	231.082	316.14		2.18254	254.455	303.445		2.18254	263.266	284.08		2.18254	267.68	284.826		2.18254	239.112	272.662		2.18254	232.857	285.704		2.18254	219.883	269.537		2.18254	226.509	270.693		2.18254
	2.29167	237.407	308.666		2.29167	248.17	312.039		2.29167	226.57	304.717		2.29167	224.207	296.728		2.29167	228.226	314.091		2.29167	251.831	300.641		2.29167	260.159	290.687		2.29167	268.429	286.543		2.29167	235.769	278.154		2.29167	227.005	287.571		2.29167	221.085	281.203		2.29167	231.346	289.661		2.29167
	2.40079	232.503	305.663		2.40079	238.107	311.958		2.40079	230.979	297.277		2.40079	231.818	299.943		2.40079	230.848	317.24		2.40079	252.66	313.62		2.40079	246.827	283.776		2.40079	268.999	297.039		2.40079	237.654	280.137		2.40079	241.265	289.32		2.40079	231.127	274.265		2.40079	232.79	277.33		2.40079
	2.50992	229.174	320.021		2.50992	222.248	317.015		2.50992	224.372	305.819		2.50992	228.195	286.481		2.50992	235.414	314.835		2.50992	252.446	321.552		2.50992	256.168	283.156		2.50992	264.44	299.859		2.50992	238.49	284.205		2.50992	244.835	289.285		2.50992	223.834	280.298		2.50992	229.424	292.706		2.50992
	2.61905	230.575	312.168		2.61905	224.073	306.691		2.61905	236.251	302.452		2.61905	232.841	292.402		2.61905	237.075	310.741		2.61905	254.157	324		2.61905	257.446	285.866		2.61905	264.315	306.981		2.61905	235.256	287.971		2.61905	245.349	291.929		2.61905	222.214	288.716		2.61905	235.988	294.354		2.61905
	2.72817	234.535	314.052		2.72817	223.584	308.169		2.72817	233.328	305.911		2.72817	238.973	292.163		2.72817	231.929	323.576		2.72817	257.813	313.679		2.72817	257.11	295.718		2.72817	264.999	301.165		2.72817	242.705	285.297		2.72817	245.241	284.368		2.72817	223.43	284.536		2.72817	247.862	280.075		2.72817
	2.8373	233.873	309.257		2.8373	218.962	300.467		2.8373	234.789	317.853		2.8373	237.525	299.296		2.8373	240.403	315.991		2.8373	255.42	309.092		2.8373	265.386	301.484		2.8373	260.653	296.248		2.8373	250.38	277.797		2.8373	256.522	297.352		2.8373	228.283	278.47		2.8373	239.003	280.125		2.8373
	2.94643	231.676	300.997		2.94643	225.093	295.416		2.94643	232.625	320.47		2.94643	233.718	297.155		2.94643	237.328	303.55		2.94643	259.116	301.873		2.94643	270.522	295.917		2.94643	264.691	286.614		2.94643	258.628	284.363		2.94643	262.742	299.773		2.94643	223.117	270.696		2.94643	246.859	291.543		2.94643
	3.05556	234.679	298.65		3.05556	224.707	302.39		3.05556	247.348	328.224		3.05556	238.781	291.333		3.05556	237.897	298.055		3.05556	255.537	310.901		3.05556	271.31	294.786		3.05556	263.221	285.265		3.05556	259.318	282.633		3.05556	277.972	295.167		3.05556	223.318	278.377		3.05556	249.96	282.885		3.05556
	3.16468	244.581	301.302		3.16468	224.811	292.611		3.16468	242.495	324.104		3.16468	234.766	299.891		3.16468	237.483	312.093		3.16468	257.297	310.089		3.16468	265.825	290.968		3.16468	260.842	293.988		3.16468	266.889	287.334		3.16468	303.249	294.45		3.16468	231.788	267.026		3.16468	251.505	274.818		3.16468
	3.27381	255.319	300.243		3.27381	220.65	293.063		3.27381	234.595	322.236		3.27381	237.313	300.022		3.27381	243.34	306.822		3.27381	259.792	299.523		3.27381	265.221	291.279		3.27381	258.473	281.323		3.27381	273.894	294.954		3.27381	310.921	284.454		3.27381	242.428	276.619		3.27381	261.095	272.264		3.27381
	3.38294	256.563	308.656		3.38294	222.99	298.227		3.38294	229.595	304.034		3.38294	234.777	293.072		3.38294	239.212	297.293		3.38294	256.956	297.072		3.38294	260.055	281.712		3.38294	263.207	277.479		3.38294	282.685	297.047		3.38294	315.482	297.514		3.38294	252.48	269.231		3.38294	278.269	277.178		3.38294
	3.49206	258.412	326.366		3.49206	222.514	305.187		3.49206	236.526	299.005		3.49206	233.42	292.803		3.49206	235.684	291.765		3.49206	266.644	301.927		3.49206	244.089	283.208		3.49206	270.048	282.156		3.49206	295.321	300.082		3.49206	307.592	294.793		3.49206	256.37	268.776		3.49206	278.784	265.551		3.49206
	3.60119	260.751	337.174		3.60119	226.197	291.927		3.60119	231.677	297.466		3.60119	233.78	288.903		3.60119	229.169	284.084		3.60119	265	299.13		3.60119	255.501	284.655		3.60119	264.73	282.125		3.60119	310.529	298.636		3.60119	310.692	299.472		3.60119	264.577	275.972		3.60119	279.196	268.391		3.60119
	3.71032	255.155	346.111		3.71032	227.894	287.674		3.71032	233.546	282.922		3.71032	236.487	283.99		3.71032	240.233	289.936		3.71032	272	296.572		3.71032	246.873	270.823		3.71032	278.457	280.481		3.71032	308.577	302.12		3.71032	306.902	293.864		3.71032	267.163	273.061		3.71032	278.369	270.116		3.71032
	3.81944	255.024	364.813		3.81944	229.441	299.99		3.81944	229.409	284.913		3.81944	243.985	284.89		3.81944	249.19	281.297		3.81944	267.367	300.499		3.81944	242.128	265.659		3.81944	282.112	279.794		3.81944	304.99	297.13		3.81944	312.976	298.768		3.81944	269.748	270.855		3.81944	289.866	273.219		3.81944
	3.92857	251.636	360.78		3.92857	223.857	302.094		3.92857	239.983	270.986		3.92857	233.839	283.063		3.92857	253.314	274.288		3.92857	263.934	285.505		3.92857	236.726	267.237		3.92857	289.984	273.154		3.92857	305.835	294.465		3.92857	312.791	303.311		3.92857	286.08	265.937		3.92857	299.722	270.86		3.92857
	4.0377	237.629	350.302		4.0377	230.299	284.954		4.0377	236.905	269.338		4.0377	232.503	285.559		4.0377	254.679	272.418		4.0377	274.429	282.402		4.0377	243.79	266.673		4.0377	288.743	275.335		4.0377	310.454	294.635		4.0377	303.42	291.012		4.0377	283.656	256.021		4.0377	295.782	266.785		4.0377
	4.14683	225.561	320.922		4.14683	225.47	285.842		4.14683	248.32	275.542		4.14683	239.098	282.295		4.14683	255.462	270.327		4.14683	275.539	275.256		4.14683	245.609	261.302		4.14683	281.979	266.952		4.14683	309.384	290.773		4.14683	288.056	275.157		4.14683	279.752	259.402		4.14683	296.343	265.464		4.14683
	4.25595	218.116	317.937		4.25595	233.678	282.671		4.25595	243.925	268.238		4.25595	233.276	275.957		4.25595	253.143	267.116		4.25595	271.753	275.606		4.25595	258.839	258.759		4.25595	280.259	261.486		4.25595	288.742	299.194		4.25595	282.452	273.439		4.25595	282.618	261.958		4.25595	286.642	266.877		4.25595
	4.36508	214.711	319.155		4.36508	226.98	275.262		4.36508	241.217	265.888		4.36508	244.517	274.344		4.36508	253.497	271.76		4.36508	267.167	279.031		4.36508	264.239	242.841		4.36508	285.266	262.919		4.36508	291.025	296.549		4.36508	271.071	282.06		4.36508	285.066	263.648		4.36508	277.424	251.264		4.36508
	4.47421	210.364	315.265		4.47421	225.343	278.717		4.47421	236.418	262.386		4.47421	245.191	270.113		4.47421	260.713	267.128		4.47421	258.502	274.669		4.47421	247.222	255.567		4.47421	293.88	261.219		4.47421	283.133	290.809		4.47421	271.723	277.253		4.47421	272.063	258.954		4.47421	280.762	251.863		4.47421
	4.58333	209.114	300.306		4.58333	224.659	269.894		4.58333	243.078	255.931		4.58333	254.402	270.32		4.58333	249.981	269.567		4.58333	244.632	279.245		4.58333	253.203	254.238		4.58333	303.027	260.649		4.58333	270.81	287.675		4.58333	262.425	282.243		4.58333	280.428	274.474		4.58333	273.908	255.148		4.58333
	4.69246	213.054	294.171		4.69246	222.593	263.786		4.69246	230.748	261.29		4.69246	257.093	268.863		4.69246	247.663	266.399		4.69246	237.8	277.86		4.69246	242.436	249.823		4.69246	293.808	258.086		4.69246	268.848	283.066		4.69246	269.437	272.155		4.69246	278.142	261.07		4.69246	263.56	257.826		4.69246
	4.80159	213.613	284.119		4.80159	226.788	272.07		4.80159	228.052	261.017		4.80159	253.273	265.838		4.80159	239.078	272.518		4.80159	237.869	274.365		4.80159	242.535	252.604		4.80159	284.329	269.932		4.80159	271.872	299.164		4.80159	268.31	262.587		4.80159	271.347	257.044		4.80159	267.635	258.893		4.80159
	4.91071	203.903	274.811		4.91071	221.97	270.034		4.91071	212.152	261.531		4.91071	251.686	266.805		4.91071	233.348	265.05		4.91071	236.186	274.65		4.91071	234.216	254.086		4.91071	276.983	261.844		4.91071	266.452	295.777		4.91071	278.53	268.501		4.91071	269.589	256.224		4.91071	263.765	256.882		4.91071
	5.01984	203.279	277.122		5.01984	207.247	261.324		5.01984	208.833	254.63		5.01984	237.211	268.592		5.01984	226.718	263.215		5.01984	226.554	270.891		5.01984	222.143	250.599		5.01984	266.332	257.254		5.01984	267.291	299.378		5.01984	274.513	271.92		5.01984	269.522	249.516		5.01984	257.58	258.272		5.01984
	5.12897	211.629	273.599		5.12897	207.002	256.517		5.12897	204.299	256.848		5.12897	231.127	259.493		5.12897	219.249	260.75		5.12897	225.037	261.198		5.12897	218.662	259.153		5.12897	254.413	263.722		5.12897	256.289	286.385		5.12897	267.797	261.728		5.12897	264.068	256.623		5.12897	260.37	253.136		5.12897
	5.2381	212.059	269.857		5.2381	203.086	254.065		5.2381	205.758	255.914		5.2381	220.809	261.427		5.2381	210.861	258.99		5.2381	219.837	271.058		5.2381	225.435	249.456		5.2381	237.292	265.375		5.2381	246.694	293.35		5.2381	255.898	262.236		5.2381	257.642	259.976		5.2381	255.477	261.449		5.2381
	5.34722	209.489	262.695		5.34722	200.824	261.112		5.34722	209.096	254.848		5.34722	215.344	268.331		5.34722	214.587	269.432		5.34722	218.398	266.02		5.34722	224.866	262.526		5.34722	232.318	261.297		5.34722	243.347	300.753		5.34722	249.456	252.941		5.34722	260.07	267.069		5.34722	261.236	259.793		5.34722
	5.45635	214.012	261.658		5.45635	198.401	259.313		5.45635	210.409	259.74		5.45635	210.428	273.486		5.45635	217.491	261.868		5.45635	219.7	258.501		5.45635	218.743	251.544		5.45635	231.088	258.765		5.45635	239.775	297.035		5.45635	237.918	264.458		5.45635	258.796	267.472		5.45635	262.135	263.822		5.45635
	5.56548	215.704	256.498		5.56548	197.982	264.434		5.56548	209.318	258.552		5.56548	206.183	264.32		5.56548	209.564	263.664		5.56548	214.44	259.085		5.56548	212.983	259.076		5.56548	232.886	248.102		5.56548	232.392	295.848		5.56548	240.369	249.813		5.56548	259.404	256.227		5.56548	259.701	266.327		5.56548
	5.6746	215.753	269.808		5.6746	196.018	253.135		5.6746	216.893	243.798		5.6746	209.52	261.146		5.6746	216.228	270.477		5.6746	217.713	263.821		5.6746	215.589	264.84		5.6746	235.152	254.515		5.6746	233.478	282.627		5.6746	233.793	250.239		5.6746	259.913	246.721		5.6746	254.882	259.888		5.6746
	5.78373	206.681	268.156		5.78373	194.758	259.809		5.78373	231.614	259.438		5.78373	212.503	259.859		5.78373	196.943	269.772		5.78373	215.906	258.72		5.78373	213.802	261.817		5.78373	238.126	262.116		5.78373	227.611	273.28		5.78373	228.346	247.825		5.78373	259.985	243.831		5.78373	253.102	256.354		5.78373
	5.89286	208.4	256.164		5.89286	208.107	261.961						5.89286	214.996	256.442		5.89286	199.737	269.003		5.89286	220.298	255.925		5.89286	219.392	268.556		5.89286	238.302	262.557		5.89286	228.059	270.875		5.89286	236.759	248.421		5.89286	256.302	250.582		5.89286	246.284	248.547		5.89286
	6.00198	206.193	260.956		6.00198	220.121	258.066						6.00198	217.04	252.735		6.00198	207.735	270.306		6.00198	218.287	257.605		6.00198	232.23	262.688		6.00198	242.365	254.46		6.00198	228.237	265.784		6.00198	234.041	250.618		6.00198	249.63	251.636		6.00198	228.983	246.006		6.00198
	6.11111	208.141	255.107																										6.11111	238.653	256.887		6.11111	238.747	272.199		6.11111	236.941	244.512		6.11111	241.965	249.583		6.11111	221.138	247.802		6.11111
																																	6.22024	246.787	270.105		6.22024	236.376	244.407		6.22024	238.184	249.354		6.22024	232.756	253.725		6.22024
																																									6.32937	239.482	260.681		6.32937	231.797	246.211		6.32937
MIN		203.279	255.107			194.758	253.135			204.299	243.798			206.183	252.735			196.943	258.99			210.486	255.925			212.983	242.841			215.473	248.102			227.611	256.04			205.702	237.66			209.493	243.831			220.8	240.158
MAX		260.751	364.813			270.699	326.169			255.788	328.224			264.768	300.022			268.043	323.576			275.539	324			284.382	301.484			303.027	306.981			310.529	302.12			315.482	303.311			286.08	288.716			299.722	294.354
TOTAL MIN		194.758	226.575
TOTAL MAX		385.737	364.813
both Rab7 and Snx1 normalised for individual min-max
	0	0.164161	0.0268992		0	0.397582	0.103852		0	0.567758	0.21706		0	0.25111	0.0963658		0	0.174051	0.206119		0	0.106697	0.0415522		0	0.309386	0.375487		0	0.281025	0.218269		0	0.274718	0.324335		0	0.3136	0.121821		0	0.40892	0.557207		0	0.169414	0.0879584		0
	0.10913	0.224947	0.074171		0.10913	0.478687	0.255961		0.10913	0.559651	0.154243		0.10913	0.34606	0.471072		0.10913	0.152424	0.249248		0.10913	0	0.070116		0.10913	0.222216	0.485819		0.10913	0.211021	0.0805536		0.10913	0.108625	0.274884		0.10913	0.480543	0.135282		0.10913	0.348307	0.726106		0.10913	0.165474	0		0.10913
	0.21825	0.351988	0.135736		0.21825	0.656466	0.244172		0.21825	0.683814	0.120645		0.21825	0.531896	0.289487		0.21825	0.236473	0.388507		0.21825	0.00545247	0.119617		0.21825	0.331648	0.391513		0.21825	0.160268	0.138303		0.21825	0.0883372	0.141207		0.21825	0.546812	0.10472		0.21825	0.324293	0.612427		0.21825	0.206873	0.111028		0.21825
	0.32738	0.483123	0.0216032		0.32738	0.788675	0.280189		0.32738	0.712086	0.184832		0.32738	0.504047	0.224108		0.32738	0.276591	0.36361		0.32738	0.0411894	0.128952		0.32738	0.349123	0.457758		0.32738	0.110585	0.0721975		0.32738	0.034915	0.164881		0.32738	0.482501	0.210749		0.32738	0.295691	0.337687		0.32738	0.228079	0.163694		0.32738
	0.43651	0.483654	0.0307002		0.43651	1	0.352436		0.43651	0.881778	0.19217		0.43651	0.549852	0.262095		0.43651	0.2621	0.356891		0.43651	0.016505	0.122607		0.43651	0.287093	0.51682		0.43651	0.068009	0.083587		0.43651	0.0642968	0.0668092		0.43651	0.48783	0.158865		0.43651	0.32248	0.451658		0.43651	0.274232	0.269695		0.43651
	0.54563	0.622989	0.0114397		0.54563	0.978424	0.309563		0.54563	0.87109	0.200943		0.54563	0.92077	0.176804		0.54563	0.310699	0.362914		0.54563	0.131505	0.161283		0.54563	0.205746	0.605975		0.54563	0.118519	0.226953		0.54563	0.0336113	0.308048		0.54563	0.311068	0.0465932		0.54563	0.17522	0.509716		0.54563	0.262105	0.256369		0.54563
	0.65476	0.54915	0.0573624		0.65476	0.850402	0.267878		0.65476	1	0.24519		0.65476	1	0.146297		0.65476	0.382581	0.21989		0.65476	0.0807463	0.148153		0.65476	0.210305	0.609499		0.65476	0.0481848	0.259876		0.65476	0.126855	0.492627		0.65476	0.236792	0		0.65476	0.104755	0.419504		0.65476	0.238264	0.429234		0.65476
	0.76389	0.396679	0.117022		0.76389	0.878213	0.291578		0.76389	0.87232	0.332434		0.76389	0.808509	0.202734		0.76389	0.544141	0.267774		0.76389	0.182422	0.214617		0.76389	0.137909	0.550538		0.76389	0.0622823	0.18765		0.76389	0.198575	0.372557		0.76389	0.131527	0.234145		0.76389	0.124585	0.393778		0.76389	0.153125	0.683577		0.76389
	0.87302	0.423931	0.176545		0.87302	0.878827	0.329088		0.87302	0.725631	0.267592		0.87302	0.905841	0.220862		0.87302	0.638398	0.292872		0.87302	0.0546231	0.209068		0.87302	0.214667	0.524194		0.87302	0	0.211103		0.87302	0.362759	0.218162		0.87302	0.117007	0.2506		0.87302	0.089884	0.353113		0.87302	0.0580192	0.39561		0.87302
	0.98214	0.457469	0.224919		0.98214	0.787906	0.261457		0.98214	0.536292	0.284225		0.98214	0.849975	0.211931		0.98214	0.763921	0.353263		0.98214	0.12236	0.154531		0.98214	0.312802	0.48829		0.98214	0.0664991	0.349817		0.98214	0.386583	0.18599		0.98214	0.0560758	0.356115		0.98214	0.012267	0.438722		0.98214	0.0380324	0.686608		0.98214
	1.09127	0.346474	0.325461		1.09127	0.856057	0.352028		1.09127	0.335868	0.447427		1.09127	0.765093	0.260961		1.09127	0.640735	0.480746		1.09127	0.199683	0.192767		1.09127	0.441252	0.595111		1.09127	0.0743193	0.442302		1.09127	0.398094	0		1.09127	0	0.434399		1.09127	0	0.655614		1.09127	0.00852865	0.779944		1.09127
	1.2004	0.38411	0.324996		1.2004	0.78672	0.455602		1.2004	0.181978	0.493022		1.2004	0.72818	0.242823		1.2004	0.763924	0.358834		1.2004	0.35368	0.191629		1.2004	0.594583	0.522823		1.2004	0.216995	0.506685		1.2004	0.479669	0.249889		1.2004	0.0417836	0.501513		1.2004	0.0660002	0.681906		1.2004	0	0.732682		1.2004
	1.30952	0.294148	0.367136		1.30952	0.729731	0.603316		1.30952	0.176417	0.54752		1.30952	0.537709	0.327342		1.30952	0.880706	0.312379		1.30952	0.566791	0.310524		1.30952	0.781483	0.476299		1.30952	0.227538	0.403495		1.30952	0.449397	0.0806762		1.30952	0.0226999	0.424963		1.30952	0.0939539	0.476125		1.30952	0.0358505	0.735889		1.30952
	1.41865	0.293003	0.388794		1.41865	0.545943	0.689944		1.41865	0.0117987	0.43856		1.41865	0.361645	0.310761		1.41865	0.70379	0.541154		1.41865	0.569229	0.411594		1.41865	0.842936	0.577029		1.41865	0.212049	0.320511		1.41865	0.482574	0.0500646		1.41865	0.0495354	0.461242		1.41865	0.155092	0.372222		1.41865	0.115429	0.667694		1.41865
	1.52778	0.230773	0.404408		1.52778	0.590188	0.72599		1.52778	0.271827	0.567197		1.52778	0.292846	0.441072		1.52778	0.762745	0.360125		1.52778	0.349087	0.2731		1.52778	0.972579	0.663577		1.52778	0.313439	0.460313		1.52778	0.412043	0.0676512		1.52778	0.0852432	0.410385		1.52778	0.145904	0.261745		1.52778	0.168586	0.554957		1.52778
	1.6369	0.250873	0.438253		1.6369	0.546183	0.792802		1.6369	0.161787	0.526149		1.6369	0.234941	0.619777		1.6369	1	0.705478		1.6369	0.327509	0.277012		1.6369	0.911366	0.879482		1.6369	0.551298	0.480373		1.6369	0.321214	0.147974		1.6369	0.0845965	0.344504		1.6369	0.167968	0.177595		1.6369	0.144279	0.452924		1.6369
	1.74603	0.360643	0.453904		1.74603	0.391002	0.724062		1.74603	0.0883553	0.673002		1.74603	0.180461	0.452303		1.74603	0.861754	0.577858		1.74603	0.582619	0.58558		1.74603	1	0.688235		1.74603	0.581173	0.531387		1.74603	0.323819	0.441495		1.74603	0.11074	0.382465		1.74603	0.175522	0.276055		1.74603	0.132	0.506208		1.74603
	1.85516	0.371244	0.469209		1.85516	0.368013	0.933707		1.85516	0.248676	0.61187		1.85516	0.0958539	0.610083		1.85516	0.584407	0.670433		1.85516	0.49571	0.49887		1.85516	0.939222	0.456494		1.85516	0.625833	0.408869		1.85516	0.181454	0.211434		1.85516	0.13231	0.431512		1.85516	0.35155	0.411639		1.85516	0.0867918	0.480634		1.85516
	1.96429	0.41822	0.415903		1.96429	0.474529	0.855278		1.96429	0.561508	0.652812		1.96429	0.144704	0.801474		1.96429	0.532632	0.750882		1.96429	0.531111	0.404988		1.96429	0.838502	0.532751		1.96429	0.675634	0.648935		1.96429	0.0899545	0.433925		1.96429	0.174831	0.545944		1.96429	0.308336	0.320781		1.96429	0.168067	0.559441		1.96429
	2.07341	0.436125	0.427169		2.07341	0.513114	0.894906		2.07341	0.602076	0.758343		2.07341	0.242275	0.646334		2.07341	0.545784	0.831226		2.07341	0.506728	0.65268		2.07341	0.886504	0.602522		2.07341	0.587061	0.497539		2.07341	0.0890801	0.378954		2.07341	0.261113	0.59451		2.07341	0.274544	0.464422		2.07341	0.193024	0.604455		2.07341
	2.18254	0.548148	0.387755		2.18254	0.623881	1		2.18254	0.532208	0.763051		2.18254	0.299053	0.741496		2.18254	0.48016	0.884876		2.18254	0.675886	0.698056		2.18254	0.704251	0.703227		2.18254	0.59628	0.623724		2.18254	0.138705	0.360725		2.18254	0.247358	0.731808		2.18254	0.135667	0.572707		2.18254	0.0723409	0.563408		2.18254
	2.29167	0.593832	0.488205		2.29167	0.703338	0.806539		2.29167	0.43253	0.721574		2.29167	0.307666	0.930324		2.29167	0.439995	0.85314		2.29167	0.635558	0.65686		2.29167	0.660735	0.815892		2.29167	0.604831	0.652873		2.29167	0.0983832	0.479917		2.29167	0.194052	0.760253		2.29167	0.151368	0.832614		2.29167	0.133632	0.913396		2.29167
	2.40079	0.50849	0.460832		2.40079	0.570826	0.805423		2.40079	0.518168	0.633449		2.40079	0.437568	0.998334		2.40079	0.476874	0.901903		2.40079	0.6483	0.847511		2.40079	0.474014	0.69805		2.40079	0.611347	0.831143		2.40079	0.121122	0.522948		2.40079	0.323948	0.786889		2.40079	0.282479	0.678056		2.40079	0.151931	0.685883		2.40079
	2.50992	0.450573	0.591709		2.50992	0.361988	0.874672		2.50992	0.389847	0.734623		2.50992	0.375724	0.713639		2.50992	0.541082	0.86467		2.50992	0.645002	0.964033		2.50992	0.604848	0.687477		2.50992	0.55928	0.879046		2.50992	0.131202	0.611224		2.50992	0.356467	0.786356		2.50992	0.187256	0.812448		2.50992	0.109276	0.969581		2.50992
	2.61905	0.474943	0.520127		2.61905	0.386019	0.733306		2.61905	0.620565	0.694739		2.61905	0.455035	0.838852		2.61905	0.564444	0.801286		2.61905	0.671318	1		2.61905	0.622742	0.733676		2.61905	0.557843	1		2.61905	0.0922061	0.692942		2.61905	0.36115	0.826628		2.61905	0.166107	1		2.61905	0.192448	1		2.61905
	2.72817	0.543848	0.5373		2.72817	0.379577	0.753549		2.72817	0.563796	0.735708		2.72817	0.559698	0.8338		2.72817	0.492072	1		2.72817	0.727507	0.848385		2.72817	0.618039	0.901684		2.72817	0.565658	0.901228		2.72817	0.18204	0.634911		2.72817	0.360166	0.711472		2.72817	0.181981	0.906871		2.72817	0.342893	0.736531		2.72817
	2.8373	0.532333	0.493592		2.8373	0.318715	0.648083		2.8373	0.592161	0.877158		2.8373	0.534992	0.984637		2.8373	0.611251	0.882563		2.8373	0.690722	0.781		2.8373	0.733946	1		2.8373	0.516023	0.817712		2.8373	0.274598	0.472167		2.8373	0.462926	0.909242		2.8373	0.24534	0.771728		2.8373	0.230646	0.737453		2.8373
	2.94643	0.494102	0.4183		2.94643	0.399451	0.578924		2.94643	0.550148	0.908163		2.94643	0.469997	0.939369		2.94643	0.568005	0.689931		2.94643	0.747548	0.674958		2.94643	0.805876	0.905069		2.94643	0.562146	0.654081		2.94643	0.374068	0.614646		2.94643	0.519585	0.946111		2.94643	0.177896	0.598538		2.94643	0.330194	0.948131		2.94643
	3.05556	0.546352	0.396906		3.05556	0.394376	0.674418		3.05556	0.836088	1		3.05556	0.556431	0.816247		3.05556	0.576015	0.604853		3.05556	0.692525	0.807569		3.05556	0.816921	0.885781		3.05556	0.545351	0.631176		3.05556	0.382394	0.577114		3.05556	0.658317	0.875954		3.05556	0.180512	0.769649		3.05556	0.369488	0.788376		3.05556
	3.16468	0.718643	0.42108		3.16468	0.395737	0.540519		3.16468	0.74184	0.951205		3.16468	0.487888	0.997228		3.16468	0.570195	0.822212		3.16468	0.719574	0.795653		3.16468	0.740096	0.820682		3.16468	0.518186	0.779331		3.16468	0.473692	0.679125		3.16468	0.888568	0.865028		3.16468	0.291105	0.516772		3.16468	0.389057	0.639526		3.16468
	3.27381	0.905481	0.411427		3.27381	0.340942	0.546715		3.27381	0.588405	0.929077		3.27381	0.53137	1		3.27381	0.652568	0.740597		3.27381	0.757933	0.640443		3.27381	0.731641	0.825984		3.27381	0.491119	0.564223		3.27381	0.558169	0.844483		3.27381	0.958453	0.712774		3.27381	0.430029	0.7305		3.27381	0.510567	0.592404		3.27381
	3.38294	0.927142	0.488114		3.38294	0.371763	0.617415		3.38294	0.49129	0.713477		3.38294	0.488087	0.853014		3.38294	0.594511	0.593052		3.38294	0.714344	0.604441		3.38294	0.659281	0.662845		3.38294	0.545189	0.498945		3.38294	0.664195	0.889908		3.38294	1	0.911702		3.38294	0.561283	0.565892		3.38294	0.728178	0.683079		3.38294
	3.49206	0.959309	0.649545		3.49206	0.36549	0.712716		3.49206	0.625912	0.65391		3.49206	0.464921	0.847323		3.49206	0.544885	0.507471		3.49206	0.863262	0.675753		3.49206	0.435662	0.688357		3.49206	0.623326	0.578366		3.49206	0.816584	0.955764		3.49206	0.928129	0.870266		3.49206	0.612082	0.555748		3.49206	0.734702	0.468541		3.49206
	3.60119	1	0.748063		3.60119	0.413998	0.531159		3.60119	0.531717	0.635677		3.60119	0.471063	0.764849		3.60119	0.453258	0.388538		3.60119	0.837988	0.634666		3.60119	0.595503	0.713037		3.60119	0.562585	0.577838		3.60119	1	0.924389		3.60119	0.956367	0.941533		3.60119	0.719235	0.716078		3.60119	0.739927	0.520936		3.60119
	3.71032	0.902643	0.829526		3.71032	0.436333	0.472916		3.71032	0.568016	0.463409		3.71032	0.517267	0.660972		3.71032	0.608866	0.479143		3.71032	0.9456	0.597087		3.71032	0.474656	0.477157		3.71032	0.719367	0.549921		3.71032	0.976453	1		3.71032	0.921844	0.856109		3.71032	0.752997	0.651229		3.71032	0.729442	0.552767		3.71032
	3.81944	0.90036	1		3.81944	0.456705	0.64155		3.81944	0.487684	0.486996		3.81944	0.645261	0.679996		3.81944	0.734846	0.345385		3.81944	0.87438	0.654773		3.81944	0.408196	0.389096		3.81944	0.761117	0.538255		3.81944	0.9332	0.891698		3.81944	0.977173	0.930804		3.81944	0.786755	0.602072		3.81944	0.87512	0.610029		3.81944
	3.92857	0.841398	0.963238		3.92857	0.383175	0.670367		3.92857	0.693047	0.322026		3.92857	0.472068	0.641366		3.92857	0.792842	0.236867		3.92857	0.8216	0.434526		3.92857	0.332548	0.416007		3.92857	0.851027	0.425481		3.92857	0.943381	0.833869		3.92857	0.975487	1		3.92857	1	0.492503		3.92857	1	0.566487		3.92857
	4.0377	0.59769	0.867728		4.0377	0.468009	0.43568		4.0377	0.633273	0.302511		4.0377	0.449267	0.694143		4.0377	0.812042	0.207918		4.0377	0.982932	0.388943		4.0377	0.431473	0.406398		4.0377	0.836853	0.462518		4.0377	0.999094	0.837569		4.0377	0.890126	0.812668		4.0377	0.968354	0.271579		4.0377	0.950084	0.491307		4.0377
	4.14683	0.387706	0.599922		4.14683	0.404421	0.447837		4.14683	0.854962	0.376002		4.14683	0.56183	0.625108		4.14683	0.823053	0.175531		4.14683	1	0.28397		4.14683	0.456955	0.314809		4.14683	0.759598	0.320153		4.14683	0.98619	0.753751		4.14683	0.750173	0.571162		4.14683	0.91737	0.346917		4.14683	0.957184	0.466919		4.14683
	4.25595	0.258174	0.572713		4.25595	0.512497	0.404418		4.25595	0.7696	0.289488		4.25595	0.462455	0.491075		4.25595	0.790446	0.125826		4.25595	0.941795	0.289109		4.25595	0.642256	0.271433		4.25595	0.739951	0.227314		4.25595	0.737247	0.936498		4.25595	0.699126	0.544998		4.25595	0.954794	0.403861		4.25595	0.834263	0.492997		4.25595
	4.36508	0.198921	0.583815		4.36508	0.424299	0.302977		4.36508	0.717002	0.261645		4.36508	0.654342	0.456983		4.36508	0.795423	0.19772		4.36508	0.871302	0.339417		4.36508	0.717877	0		4.36508	0.797137	0.251649		4.36508	0.764779	0.879096		4.36508	0.595455	0.676317		4.36508	0.986762	0.441512		4.36508	0.717472	0.204913		4.36508
	4.47421	0.123291	0.548357		4.47421	0.402747	0.350278		4.47421	0.623799	0.220164		4.47421	0.665838	0.367492		4.47421	0.896908	0.126012		4.47421	0.738106	0.275339		4.47421	0.479544	0.217007		4.47421	0.895519	0.222781		4.47421	0.669598	0.75454		4.47421	0.601394	0.603084		4.47421	0.816981	0.336936		4.47421	0.759766	0.215969		4.47421
	4.58333	0.101531	0.412001		4.58333	0.393738	0.229467		4.58333	0.753152	0.14371		4.58333	0.823059	0.371887		4.58333	0.745967	0.163763		4.58333	0.524896	0.342571		4.58333	0.563312	0.194341		4.58333	1	0.2131		4.58333	0.520982	0.686516		4.58333	0.516697	0.67909		4.58333	0.926197	0.682712		4.58333	0.672918	0.276583		4.58333
	4.69246	0.170084	0.356079		4.69246	0.366538	0.145842		4.69246	0.513691	0.207185		4.69246	0.869001	0.341073		4.69246	0.713374	0.114715		4.69246	0.419871	0.322216		4.69246	0.412522	0.119058		4.69246	0.894699	0.169569		4.69246	0.497318	0.586498		4.69246	0.58057	0.525437		4.69246	0.89635	0.384079		4.69246	0.541811	0.326003		4.69246
	4.80159	0.179819	0.264452		4.80159	0.421771	0.25926		4.80159	0.461321	0.203952		4.80159	0.803788	0.277092		4.80159	0.592625	0.209464		4.80159	0.420927	0.270885		4.80159	0.413907	0.166481		4.80159	0.786436	0.370751		4.80159	0.53379	0.935838		4.80159	0.570304	0.379691		4.80159	0.807632	0.294362		4.80159	0.593433	0.345685		4.80159
	4.91071	0.0108696	0.179607		4.91071	0.358325	0.231393		4.91071	0.152523	0.210045		4.91071	0.776712	0.297546		4.91071	0.512034	0.093827		4.91071	0.395056	0.275067		4.91071	0.297382	0.191758		4.91071	0.70253	0.2334		4.91071	0.468429	0.862356		4.91071	0.6634	0.46978		4.91071	0.784674	0.276113		4.91071	0.544403	0.308583		4.91071
	5.01984	0	0.200673		5.01984	0.164448	0.112123		5.01984	0.0880465	0.128297		5.01984	0.52962	0.335338		5.01984	0.418781	0.0654152		5.01984	0.247003	0.219843		5.01984	0.128293	0.132299		5.01984	0.580884	0.155429		5.01984	0.47854	0.940487		5.01984	0.626808	0.521861		5.01984	0.783806	0.126639		5.01984	0.46603	0.334218		5.01984
	5.12897	0.145298	0.16856		5.12897	0.161227	0.0463045		5.12897	0	0.154565		5.12897	0.42578	0.142909		5.12897	0.313737	0.0272505		5.12897	0.223677	0.0774622		5.12897	0.0795444	0.278155		5.12897	0.44475	0.265289		5.12897	0.345857	0.658517		5.12897	0.565631	0.366616		5.12897	0.712592	0.284984		5.12897	0.501379	0.239449		5.12897
	5.2381	0.152778	0.13445		5.2381	0.109664	0.0127434		5.2381	0.0283363	0.143511		5.2381	0.249653	0.183822		5.2381	0.195761	0		5.2381	0.143739	0.222299		5.2381	0.174406	0.1128		5.2381	0.249208	0.293359		5.2381	0.230143	0.809681		5.2381	0.457242	0.37435		5.2381	0.628688	0.359701		5.2381	0.439382	0.392838		5.2381
	5.34722	0.108068	0.0691667		5.34722	0.0798683	0.109222		5.34722	0.0931583	0.13088		5.34722	0.15638	0.32981		5.34722	0.248163	0.161676		5.34722	0.121624	0.148294		5.34722	0.166439	0.335675		5.34722	0.192392	0.22411		5.34722	0.189773	0.97033		5.34722	0.398561	0.23277		5.34722	0.66039	0.517714		5.34722	0.51236	0.362283		5.34722
	5.45635	0.186757	0.0597141		5.45635	0.0479694	0.0845895		5.45635	0.118657	0.188826		5.45635	0.0724588	0.438841		5.45635	0.289	0.0445701		5.45635	0.141643	0.037849		5.45635	0.0806775	0.14841		5.45635	0.178345	0.181104		5.45635	0.146698	0.889639		5.45635	0.29346	0.408191		5.45635	0.643758	0.526707		5.45635	0.523744	0.436627		5.45635
	5.56548	0.216195	0.0126793		5.56548	0.0424546	0.154713		5.56548	0.0974758	0.174759		5.56548	0	0.244991		5.56548	0.177519	0.072378		5.56548	0.060775	0.0464291		5.56548	0	0.276844		5.56548	0.198885	0		5.56548	0.0576541	0.863882		5.56548	0.315786	0.185122		5.56548	0.651693	0.27616		5.56548	0.492907	0.482858		5.56548
	5.6746	0.217044	0.134004		5.6746	0.0165881	0		5.6746	0.24459	0		5.6746	0.0569685	0.177863		5.6746	0.271248	0.177856		5.6746	0.111095	0.11599		5.6746	0.0365075	0.375139		5.6746	0.224761	0.10891		5.6746	0.0707525	0.576977		5.6746	0.255884	0.191616		5.6746	0.658343	0.0643901		5.6746	0.431853	0.364041		5.6746
	5.78373	0.0592026	0.118945		5.78373	0	0.0913822		5.78373	0.530511	0.185251		5.78373	0.107879	0.150666		5.78373	0	0.16695		5.78373	0.0833212	0.0410586		5.78373	0.0114763	0.323581		5.78373	0.258736	0.238006		5.78373	0	0.37413		5.78373	0.206267	0.154841		5.78373	0.659279	0		5.78373	0.409299	0.298837		5.78373
	5.89286	0.0891128	0.00963484		5.89286	0.175778	0.120855						5.89286	0.150443	0.0783865		5.89286	0.039301	0.155043		5.89286	0.150835	0		5.89286	0.089763	0.438507		5.89286	0.260746	0.245509		5.89286	0.00539807	0.321954		5.89286	0.282902	0.163921		5.89286	0.611182	0.150403		5.89286	0.322909	0.154777		5.89286
	6.00198	0.0507116	0.0533152		6.00198	0.333976	0.067518						6.00198	0.18532	0		6.00198	0.151791	0.17521		6.00198	0.119916	0.0246872		6.00198	0.269568	0.338435		6.00198	0.307151	0.107981		6.00198	0.00754595	0.211471		6.00198	0.258144	0.197389		6.00198	0.524077	0.173879		6.00198	0.103687	0.107899		6.00198
	6.11111	0.0845976	0																										6.11111	0.264747	0.149203		6.11111	0.134305	0.350669		6.11111	0.28456	0.104374		6.11111	0.423988	0.128148		6.11111	0.00429157	0.141042		6.11111
																																	6.22024	0.231264	0.305238		6.22024	0.279413	0.102783		6.22024	0.374621	0.123041		6.22024	0.1515	0.250324		6.22024
																																									6.32937	0.391576	0.375406		6.32937	0.139346	0.11168		6.32937
[truncated: 56 more columns]

## Sheet: exp1 pooled
	both Rab7 and Snx1 normalised for individual min-max
		Rab7	Snx1
		0.528656	0.018222
		0.499722	0.145726
		0.426481	0.133091
		0.361603	0.144626
		0.291083	0.124205
		0.232671	0.153842
		0.166406	0.186678
		0.0572182	0.284135
		0.0371637	0.271161
		0.0164718	0.262594
		0	0.276308
		0.10007	0.370987
		0.182429	0.36376
		0.306181	0.449392
		0.464623	0.488305
		0.627285	0.631692
		0.77568	0.796729
		0.827991	0.90922
		0.909802	1
		0.929637	0.941656
		0.899328	0.787414
		0.896455	0.731038
		0.892675	0.676512
		0.934126	0.550638
		0.900594	0.484227
		0.91352	0.414368
		0.939711	0.481498
		0.869873	0.612051
		0.905982	0.593229
		0.823497	0.429401
		0.779523	0.701691
		0.767379	0.5676
		0.80707	0.61404
		0.785628	0.617788
		0.772995	0.498381
		0.850173	0.663538
		0.894498	0.484327
		1	0.503708
		0.983474	0.396516
		0.881487	0.350956
		0.779478	0.350416
		0.749924	0.442845
		0.685073	0.359212
		0.627222	0.416047
		0.722722	0.383151
		0.652197	0.275339
		0.809018	0.211027
		0.868454	0.186058
		0.81028	0.241554
		0.789112	0.289043
		0.615482	0.245002
		0.567499	0.230259
		0.443563	0.176272
		0.433875	0
		0.409654	0.059054
		0.39395	0.174093
		0.510281	0.0444105
		0.515262	0.0970095
		0.487526	0.136765
		0.382841	0.0639078
		0.340958	0.297084
		0.293307	0.154897
		0.25994	0.138273
		0.207746	0.131545
		0.0721555	0.177141
		0.0915812	0.0406152
		0.0273006	0.313508
		0	0.364104
		0.0575946	0.485019
		0.049188	0.365671
		0.126451	0.166439
		0.218639	0.570529
		0.344634	0.624049
		0.404883	0.411373
		0.454331	0.599151
		0.502288	0.81126
		0.555524	0.779962
		0.654361	0.847328
		0.760913	0.812195
		0.854023	0.900796
		0.982073	0.926166
		1	0.731617
		0.922783	0.662663
		0.926074	0.816399
		0.968689	0.753333
		0.880683	0.684513
		0.852499	0.849481
		0.820961	0.761689
		0.779313	0.751306
		0.754629	1
		0.668038	0.751579
		0.678576	0.592999
		0.670977	0.655031
		0.58275	0.694087
		0.51898	0.599125
		0.461486	0.351511
		0.512604	0.486314
		0.511427	0.306951
		0.610787	0.133695
		0.610406	0.0796077
		0.617419	0.0386714
		0.636401	0.253896
		0.66677	0.189168
		0.643342	0.29861
		0.698726	0.171276
		0.780837	0.173752
		0.863978	0.432466
		0.848877	0.270256
		0.812998	0.31369
		0.765925	0.212582
		0.688322	0.17048
		0.660222	0.260328
		0.618867	0.323279
		0.58527	0
		0.520977	0.177066
		0.488623	0.135188
		0.489967	0.0448547
		0.219981	0.296238
		0.23866	0.340219
		0.157824	0.183162
		0.140119	0.200829
		0.0623465	0.155929
		0.0715172	0.144189
		0	0.177857
		0.018371	0.124327
		0.0840769	0.305806
		0.252786	0.220545
		0.388828	0.32045
		0.377409	0.423698
		0.271072	0.486288
		0.265061	0.449499
		0.24676	0.516713
		0.238278	0.448909
		0.315366	0.399076
		0.480638	0.513974
		0.624891	0.565385
		0.758936	0.737978
		0.927083	0.841107
		0.947524	0.910126
		0.951502	1
		0.960065	0.842012
		1	0.688805
		0.955943	0.787792
		0.855677	0.672713
		0.829454	0.614527
		0.783171	0.431057
		0.742428	0.382988
		0.764618	0.368811
		0.781663	0.36851
		0.734999	0.32394
		0.649396	0.354135
		0.524625	0.35714
		0.625288	0.287923
		0.698916	0.125937
		0.731291	0.147521
		0.714409	0.194781
		0.681715	0.409077
		0.556141	0.228339
		0.401339	0.0571575
		0.413232	0.0193323
		0.386002	0.10952
		0.373942	0.0186037
		0.449059	0
		0.475875	0.083949
		0.429274	0.107857
		0.489783	0.100842
		0.595975	0.0968093
		0.727361	0.0966317
		0.866818	0.199681
		0.87234	0.143068
		0.763751	0.275836
		0.668382	0.267862
		0.500987	0.132266
		0.348334	0.117537
		0.275428	0.286357
		0.207099	0.229656
		0.188706	0.17173
		0.19454	0.299338
		0.104844	0.0892728
		0.0922825	0.12162
		0.124196	0.123163
		0.154467	0.1503
		0.173175	0.15284
		0.196566	0.143341
		0.20777	0.116086
		0.275994	0.122071
		0.442192	0.352218
		0.649167	0.497094
		0.901385	0.796148
		1	0.906208
		0.910812	0.983667
		0.804725	1
		0.685549	0.936412
		0.539761	0.902512
		0.490596	0.654023
		0.506441	0.461174
		0.469601	0.605241
		0.558471	0.437603
		0.671113	0.358158
		0.801535	0.510693
		0.822065	0.682634
		0.755186	0.824224
		0.71861	0.727518
		0.766291	0.726522
		0.852052	0.593594
		0.914767	0.519261
		0.923024	0.402503
		0.869201	0.409219
		0.828117	0.410311
		0.768841	0.27886
		0.750542	0.245557
		0.786723	0.331934
		0.78536	0.396062
		0.766579	0.422095
		0.694286	0.367336
		0.666185	0.283282
		0.537787	0.143256
		0.511773	0.173994
		0.439578	0.0894722
		0.378705	0.16791
		0.275838	0.219054
		0.244653	0.0284891
		0.239384	0.0494433
		0.255653	0.0497436
		0.315368	0
		0.356278	0.13567
		0.346991	0.157549
		0.377223	0.195632
		0.365191	0.154118
		0.299435	0.149429
		0.231175	0.0607632
		0.151585	0.118488
		0.0854596	0.162675
		0.052373	0.240102
		0.0631916	0.0318103
		0	0.168786
		0.0718297	0.0626917
		0.0852327	0.0483799
		0.0514333	0.0678733
		0.0107587	0.0722806
		0	0.21779
		0.0410028	0.200275
		0.0648274	0.285978
		0.0841076	0.538636
		0.129244	0.407799
		0.202195	0.428403
		0.228959	0.432322
		0.315729	0.335987
		0.330667	0.284631
		0.30922	0.345941
		0.316612	0.299437
		0.351709	0.299096
		0.447155	0.390802
		0.535819	0.363515
		0.635691	0.44925
		0.773751	0.389639
		0.867703	0.496769
		0.928297	0.674938
		0.988138	0.663035
		0.948362	0.724744
		0.835016	0.645859
		0.74245	0.466109
		0.71424	0.352621
		0.718753	0.312933
		0.82657	0.369551
		0.940716	0.405117
		1	0.365617
		0.981231	0.35195
		0.940402	0.376659
		0.790282	0.4903
		0.681771	0.508845
		0.672697	0.794427
		0.685007	0.767269
		0.614385	0.871314
		0.615469	0.760536
		0.629254	0.846409
		0.607983	0.71975
		0.569652	0.790068
		0.544027	1
		0.504383	0.941957
		0.454651	0.808471
		0.375184	0.696573
		0.342391	0.314725
		0.286766	0.367834
		0.224219	0.288123
		0.186834	0.180333
		0.101597	0.123865
		0.104365	0.117777
		0.116	0.0829331
		0.111581	0.0371579
		0.0952959	0.0466715
		0.065479	0.0503748
		0.0383095	0
		0.0285282	0.0653742
		0.0066622	0.464597
		0.0150419	0.210446
		0	0.259079
		0.0315105	0.294757
		0.0766508	0.279515
		0.105963	0.144731
		0.138763	0.146935
		0.170879	0.20044
		0.241422	0.227395
		0.206868	0.313891
		0.181013	0.277349
		0.231714	0.279595
		0.299606	0.389028
		0.372118	0.561972
		0.392081	0.47419
		0.466997	0.485522
		0.468634	0.632076
		0.619372	0.660421
		0.629286	0.81704
		0.746208	0.579184
		0.780726	0.730093
		0.889156	0.774905
		0.924937	0.850172
		0.899791	0.884858
		0.916504	0.865222
		1	1
		0.994552	0.747341
		0.890356	0.728165
		0.845562	0.741686
		0.837066	0.648889
		0.811587	0.593624
		0.802645	0.602156
		0.827362	0.540877
		0.843974	0.476171
		0.824882	0.480994
		0.765943	0.386784
		0.78594	0.495166
		0.775271	0.304611
		0.755863	0.197633
		0.584889	0.186452
		0.527831	0.0330507
		0.442969	0.129012
		0.4364	0.20391
		0.398337	0.202465
		0.307607	0
		0.201149	0.169656
		0.101873	0.127699
		0.0917097	0.313465
		0.112766	0.181086
		0.129865	0.223318
		0.172311	0.377495
		0.223715	0.468005
		0.213056	0.623718
		0.170474	0.568645
		0.186815	0.410247
		0.169902	0.604396
		0.0872267	0.362865
		0.0916878	0.46162
		0.0389789	0.414792
		0.00209125	0.420441
		0.856908	0.70191
		1	0.663138
		0.943701	0.753347
		0.830607	0.590362
		0.703667	0.625462
		0.61086	0.674939
		0.53858	0.766205
		0.469035	0.71758
		0.454713	0.576527
		0.45162	0.7203
		0.465738	0.499542
		0.500042	0.469949
		0.529159	0.405863
		0.375786	0.428108
		0.355968	0.441082
		0.245388	0.607187
		0.198104	0.486232
		0.192135	0.593359
		0.198379	0.705256
		0.283621	0.867631
		0.437475	1
		0.479441	0.943806
		0.587951	0.685589
		0.638039	0.412235
		0.703649	0.420384
		0.765147	0.608526
		0.752405	0.374178
		0.653519	0.324735
		0.588366	0.467493
		0.450312	0.515514
		0.362662	0.573494
		0.280991	0.645506
		0.277485	0.752379
		0.315996	0.611219
		0.309699	0.808707
		0.402819	0.66578
		0.51556	0.849417
		0.584876	0.783351
		0.532975	0.56744
		0.462161	0.399108
		0.534289	0.300199
		0.583899	0.417119
		0.528451	0.395634
		0.418203	0.27424
		0.353217	0.261086
		0.318463	0.324372
		0.300672	0.349348
		0.324674	0.188419
		0.280707	0.188185
		0.198193	0.030466
		0.106378	0
		0.0319299	0.128136
		0.0162561	0.323172
		0	0.28839
		0.00894921	0.346437
		0.0110842	0.311256
		0.0630028	0.353074
		0.110732	0.168227
		0.142575	0.281631
		0.266673	0.308745
		0.482209	0.364037
		0.768234	0.62503
		0.0307029	0.257108
		0.0191013	0.218949
		0.0174144	0.1388
		0	0.146686
		0.0400859	0.183765
		0.140755	0.422518
		0.238947	0.381944
		0.342553	0.372932
		0.604252	0.449662
		0.758841	0.593344
		0.838613	0.769669
		0.969216	0.757674
		0.955788	0.959331
		0.937771	0.866375
		0.824071	0.846913
		0.694945	0.762336
		0.655263	0.766131
		0.661929	0.705437
		0.621718	0.639167
		0.615624	0.716049
		0.664022	0.723105
		0.700528	0.757053
		0.834135	0.781227
		0.930834	0.954667
		0.871365	0.823351
		0.97576	0.716942
		1	0.626138
		0.906496	0.640529
		0.809871	0.471782
		0.643658	0.663767
		0.658403	0.667453
		0.599327	0.458508
		0.498845	0.644913
		0.527278	0.524188
		0.497314	0.500419
		0.495847	0.554466
		0.577445	0.710069
		0.574003	0.927984
		0.638468	1
		0.605462	0.917964
		0.47448	0.631306
		0.457065	0.660048
		0.432707	0.367253
		0.415729	0.283843
		0.357271	0.341417
		0.275364	0.248479
		0.22364	0.136609
		0.1756	0.0537727
		0.191849	0.135817
		0.205677	0.139576
		0.30915	0.0992851
		0.254939	0.114912
		0.199505	0.0101249
		0.231739	0.0610469
		0.245071	0.00674369
		0.158057	0
		0.121477	0.128065
		0.0560945	0.0598379
		0.109723	0.0669546
		0.138301	0.100844
		0.120912	0.206964
		0.216074	0.289897
		0.327875	0.264484
		0.365126	0.333788
		0.397842	0.32604
		0.470606	0.413207
		0.42362	0.409182
		0.353091	0.234952
		0.334195	0.266578
		0.277656	0.310033
		0.255391	0.245759
		0.273633	0.2633
		0.300748	0.308224
		0.355781	0.37265
		0.389924	0.295542
		0.435167	0.241999
		0.516106	0.31673
		0.646727	0.451207
		0.755884	0.447987
		0.865901	0.809328
		0.960124	0.890007
		1	0.928651
		0.962469	1
		0.8845	0.835431
		0.868867	0.861677
		0.833141	0.619868
		0.753292	0.576147
		0.683907	0.466769
		0.620686	0.330037
		0.544659	0.354114
		0.521313	0.387141
		0.53181	0.339926
		0.560429	0.40707
		0.612588	0.468322
		0.63922	0.48575
		0.593055	0.601739
		0.598181	0.655594
		0.574738	0.686491
		0.579364	0.646492
		0.524423	0.56246
		0.399486	0.539198
		0.269683	0.391782
		0.176661	0.372953
		0.126436	0.330672
		0.0547945	0.214238
		0.0216012	0.180273
		0.011876	0.169011
		0.0118626	0.122411
		0.0503319	0.105551
		0.0538506	0.113091
		0.0353133	0.0748823
		0.0409271	0.0142831
		0.0433214	0.0388524
		0.0281781	0.0325728
		0.0401539	0.0680344
		0.0227965	0.184061
		0	0.060476
		0.0273857	0
		0.095806	0.039648
		0.0381376	0.0831149
		0.073235	0.138359
		0.0672207	0.0709911
		0.0942428	0.0230157
		0.147038	0.070164
		0.183269	0.190014
		0.192384	0.110083
		0.237647	0.180241
		0.301301	0.229571
		0.356579	0.190286
		0.37374	0.398806
		0.354638	0.32833
		0.368098	0.416953
		0.435548	0.410226
		0.484807	0.317169
		0.490616	0.390501
		0.465774	0.429173
		0.459757	0.345517
		0.447393	0.276568
		0.424442	0.31051
		0.431622	0.301199
		0.47919	0.280544
		0.53899	0.354843
		0.600483	0.280889
		0.71185	0.351916
		0.791213	0.506398
		0.878141	0.538362
		0.983063	0.653723
		1	0.809652
		0.990362	0.792776
		0.86396	0.730533
		0.681056	0.588549
		0.600838	0.404464
		0.503983	0.270588
		0.473966	0.272081
		0.415059	0.18653
		0.416942	0.177709
		0.408225	0.248953
		0.329093	0.23425
		0.280101	0.239141
		0.263396	0.298869
		0.295215	0.398235
		0.351165	0.373139
		0.428773	0.483458
		0.531465	0.545556
		0.611803	0.74071
		0.681201	0.950592
		0.675944	0.976451
		0.669739	1
		0.682048	0.904878
		0.679446	0.794744
		0.609128	0.461874
		0.460042	0.388656
		0.322573	0.271327
		0.23278	0.234408
		0.169201	0.125515
		0.126133	0.0271204
		0.113857	0.0351639
		0.16812	0.00761323
		0.171413	0
		0.160233	0.0304997
		0.0985628	0.0552061
		0.03055	0.00934157
		0	0.0277256
		0.0226159	0.151511
		0.034353	0.0892765
		0.0368359	0.0810377
		0.058819	0
		0.0634724	0.0546568
		0.0714671	0.0294113
		0.0835925	0.0236637
		0.0930279	0.14091
		0.0774071	0.185301
		0.129663	0.115727
		0.172147	0.160627
		0.201303	0.213882
		0.217225	0.337776
		0.288375	0.309743
		0.306045	0.376498
		0.344122	0.495122
		0.414461	0.540875
		0.486021	0.556333
		0.577403	0.568211
		0.593516	0.522982
		0.55876	0.423199
		0.485207	0.318348
		0.420938	0.327447
		0.386238	0.329695
		0.315452	0.360445
		0.309815	0.353405
		0.30985	0.41049
		0.317885	0.305538
		0.377057	0.544861
		0.47366	0.634238
		0.613086	0.827377
		0.80805	1
		0.942326	0.956149
		1	0.919925
		0.900216	0.737788
		0.77682	0.620793
		0.673306	0.484308
		0.597801	0.568454
		0.46784	0.577256
		0.379606	0.581703
		0.316899	0.554453
		0.258615	0.550679
		0.24332	0.409715
		0.259549	0.383224
		0.295398	0.336304
		0.315938	0.29611
		0.299795	0.332835
		0.251909	0.301435
		0.204635	0.192834
		0.165567	0.246159
		0.131159	0.314848
		0.0926513	0.278781
		0.0709792	0.252384
		0.059473	0.23172
		0.0133062	0.140056
		0	0.169647
		0.00301962	0.162498
		0.00933094	0.128765
		0.0291629	0.0632547
		0.0304643	0.0896356
		0.0371348	0.083841
		0.0464081	0.12474
		0.0308489	0.0774435
		0.032803	0.00862136
		0.0379028	0.0353155
		0.00947971	0.0177126
		0.031251	0.0255196
		0.0304428	0.0547664
		0.0503279	0.125051
		0.0593417	0.194233
		0.0266008	0.231929
		0.0179108	0.3165
		0	0.421794
		0.0113626	0.465958
		0.062066	0.572134
		0.114509	0.514622
		0.154106	0.346611
		0.212881	0.418155
		0.266362	0.411443
		0.333942	0.461525
		0.395305	0.358009
		0.41903	0.345615
		0.485525	0.525237
		0.573958	0.64974
		0.675737	0.612583
		0.775678	0.472509
		0.820873	0.346455
		0.769308	0.337764
		0.688025	0.227419
		0.55184	0.273978
		0.452075	0.426081
		0.458792	0.482801
		0.440527	0.450989
		0.453786	0.582005
		0.50297	0.647817
		0.51995	0.740217
		0.514155	0.911854
		0.513789	0.94373
		0.524902	0.923093
		0.612462	0.975775
		0.723235	1
		0.856409	0.810724
		0.954429	0.700371
		1	0.6112
		0.943999	0.571859
		0.876201	0.653203
		0.764442	0.714582
		0.635882	0.596695
		0.584196	0.619062
		0.623874	0.701408
		0.67744	0.666757
		0.712629	0.59889
		0.670361	0.645619
		0.618931	0.495446
		0.570583	0.435381
		0.564996	0.430876
		0.563987	0.284532
		0.525841	0.260651
		0.483312	0.280954
		0.43094	0.316778
		0.367886	0.324414
		0.286948	0.272494
		0.224809	0.224777
		0.217282	0.213526
		0.253396	0.171307
		0.281248	0.0463682
		0.263531	0.139259
		0.268253	0.13027
		0.228669	0.174575
		0.17419	0.124837
		0.121304	0.185753
		0.0857279	0.0519394
		0.0348598	0
		0.0421206	0.100978
		0.090666	0.104491
		0.0534865	0.170942
		0.06908	0.0840553
		0.0608413	0.132674
		0.0999216	0.178367
		0.184642	0.0576882
		0.23076	0.0921443
		0.280217	0.00716088
		0.346483	0.0715268
		0.399137	0.201578
		0.442074	0.215994
		0.451243	0.448065
		0.538256	0.55556
		0.602941	0.562684
		0.571444	0.540263
		0.536178	0.645608
		0.558167	0.518106
		0.589029	0.598696
		0.529543	0.577135
		0.608626	0.666769
		0.521442	0.625363
		0.452444	0.533539
		0.435313	0.529678
		0.446263	0.495684
		0.412863	0.49208
		0.476349	0.525999
		0.507111	0.627372
		0.505591	0.679837
		0.559723	0.763848
		0.67921	0.797872
		0.775952	0.884145
		0.855398	0.728502
		0.852088	0.691722
		0.797837	0.658833
		0.801373	0.700476
		0.775899	0.657169
		0.738283	0.701615
		0.763179	0.890856
		0.719325	1
		0.723749	0.886478
		0.758507	0.695199
		0.827899	0.48101
		0.915732	0.462136
		0.976026	0.47795
		0.993839	0.484938
		1	0.473982
		0.960525	0.456712
		0.883324	0.443219
		0.785168	0.414612
		0.686682	0.440999
		0.551561	0.421884
		0.403184	0.323047
		0.299264	0.226158
		0.236646	0.375553
		0.222951	0.355134
		0.227054	0.263235
		0.168756	0.272399
		0.171771	0.305672
		0.115079	0.205472
		0.0881583	0.15144
		0.0207995	0.102994
		0	0.0604197
		0.0266236	0.0838553
		0.0356045	0
		0.0672081	0.10472
		0.0308937	0.35356
		0.0349546	0.322321
		0	0.180054
		0.06306	0.155684
		0.111179	0.15747
		0.182169	0.0514764
		0.283824	0.00900508
		0.399412	0.101722
		0.511674	0.0505081
		0.593625	0
		0.767714	0.194048
		0.833724	0.164959
		0.862937	0.0398068
		0.894056	0.171992
		0.897594	0.336948
		0.973542	0.341189
		0.991464	0.358377
		1	0.316561
		0.93757	0.484043
		0.928302	0.506896
		0.848827	0.54102
		0.769427	0.638224
		0.675801	0.54425
		0.673274	0.664929
		0.518577	0.564629
		0.503387	0.553083
		0.498144	0.552539
		0.592463	0.630656
		0.77372	0.584614
		0.838541	0.607645
		0.921468	0.732612
		0.910555	1
		0.74755	0.843244
		0.647738	0.873756
		0.582805	0.787018
		0.390428	0.9092
		0.382889	0.852196
		0.390867	0.84248
		0.385122	0.567908
		0.396491	0.487132
		0.397788	0.439231
		0.433802	0.288422
		0.446108	0.250437
		0.463051	0.201476
		0.556047	0.210459
		0.664267	0.292722
		0.682272	0.23627
		0.60452	0.174976
		0.52148	0.145372
		0.439646	0.152127
		0.319646	0.353344
		0.230597	0.126346
		0.209767	0.03948
		0.190864	0.00234974
		0.228679	0.123232
		0.279697	0.112528
		0.216769	0.253539
		0.203824	0.277354
		0.106356	0.285785
		0.0663705	0.288309
		0.0427613	0.365437
		0.116814	0.0152227
		0.123745	0.0811452
		0.068995	0.0307784
		0.0242506	0.106201
		0.00275682	0.10368
		0	0.144313
		0.00961554	0.239283
		0.0220663	0.307947
		0.103867	0.300701
		0.174264	0.347335
		0.279462	0.219291
		0.380102	0.365853
		0.431997	0.343839
		0.399309	0.281727
		0.365604	0.214333
		0.429789	0.17081
		0.464116	0.360652
		0.56603	0.331315
		0.604132	0.402716
		0.689552	0.517732
		0.815807	0.54254
		0.928162	0.502525
		1	0.49636
		0.991045	0.440611
		0.924111	0.51616
		0.865853	0.52468
		0.75409	0.629975
		0.640166	0.573423
		0.623077	0.75357
		0.645776	0.920692
		0.722151	0.999052
		0.686195	0.975434
		0.639182	0.98785
		0.686644	1
		0.7415	0.918789
		0.721091	0.778521
		0.66615	0.663328
		0.587167	0.640562
		0.541654	0.621134
		0.4837	0.554535
		0.334163	0.551894
		0.291929	0.369388
		0.263215	0.454043
		0.23124	0.463214
		0.219479	0.440992
		0.202656	0.346367
		0.207216	0.316273
		0.179589	0.449182
		0.166478	0.47583
		0.178587	0.356741
		0.159311	0.264074
		0.146819	0.201395
		0.130257	0.283314
		0.113392	0.244709
		0.117304	0.156715
		0.113194	0.161485
		0.118363	0.138516
		0.094622	0.196734
		0.0961671	0.177905
		0.0437797	0.175391
		0.075242	0.0991006
		0.0817066	0
		0.0885908	0.0257668
		0.0132125	0.0761874
		0.0106246	0.0288359
		0.00360588	0.0389221
		0.00200077	0.0382406
		0.0639376	0.0800569
		0.0836236	0.14999
		0.119792	0.149904
		0.0979667	0.0682482
		0.0410028	0.162316
		0.0224555	0
		0	0.0865167
		0.0126479	0.0471665
		0.0701136	0.12413
		0.131948	0.2713
		0.198634	0.182755
		0.239555	0.256993
		0.340275	0.293894
		0.446727	0.427779
		0.553081	0.61479
		0.732185	0.743656
		0.899761	0.975695
		1	1
		0.983013	0.947657
		0.974421	0.716406
		0.876406	0.599567
		0.789379	0.575707
		0.699639	0.60023
		0.621436	0.750762
		0.56848	0.868193
		0.554307	0.815357
		0.523811	0.856983
		0.523969	0.87504
		0.553879	0.7899
		0.616918	0.769747
		0.707919	0.765125
		0.812496	0.717639
		0.843665	0.671411
		0.81864	0.561944
		0.804969	0.726351
		0.648716	0.771547
		0.52275	0.792378
		0.409438	0.785274
		0.36881	0.751535
		0.329345	0.593672
		0.265639	0.61339
		0.221577	0.580003
		0.220251	0.461096
		0.203243	0.432391
		0.206631	0.429688
		0.201855	0.542586
		0.190245	0.52979
		0.150712	0.406516
		0.140996	0.423511
		0.160404	0.46482
		0.121466	0.43061
		0.13735	0.334881
		0.154736	0.447375
		0.134724	0.443015
		0.133329	0.30506
		0.108894	0.291794
		0.0612356	0.248866
		0.0885258	0.0965547
		0.0637125	0.103055
		0.0337444	0.0941278
		0.0149864	0.060784
		0.0241138	0.117637
		0	0
		0.0187304	0.0401606
		0.011665	0.0960622
		0.00919142	0.168981
		0.0151913	0.128067
		0.0781994	0.111327
		0.107225	0.144598
		0.139145	0.14017
		0.167932	0.255061
		0.189681	0.353725
		0.259278	0.316543
		0.346973	0.443924
		0.518918	0.626471
		0.660389	0.525201
		0.727193	0.528921
		0.824998	0.672636
		0.863486	0.692236
		0.92055	0.708776
		0.955725	0.768152
		0.946138	0.817188
		0.903329	0.802524
		0.944529	0.950282
		0.999183	0.841158
		0.97906	0.845692
		0.960603	0.757065
		0.903309	0.792051
		0.892539	0.806815
		0.853021	0.912591
		1	0.944134
		0.91075	0.935515
		0.812123	0.952477
		0.810291	0.951435
		0.881268	1
		0.898197	0.810292
		0.900099	0.720888
		0.850106	0.810688
		0.826162	0.839583
		0.742465	0.914376
		0.733203	0.996494
		0.801688	0.791056
		0.810557	0.691195
		0.794354	0.619735
		0.774329	0.508956
		0.763766	0.426016
		0.706806	0.313171
		0.534366	0.408353
		0.467819	0.307188
		0.448079	0.363766
		0.489611	0.330336
		0.504802	0.34275
		0.5386	0.493728
		0.477096	0.374348
		0.451331	0.361107
		0.372495	0.455179
		0.331365	0.395019
		0.239094	0.287503
		0.192282	0.36585
		0.177105	0.286343
		0.163472	0.252565
		0.0497752	0.116711
		0.0599256	0.131111
		0.0195752	0.101908
		0.060821	0.340935
		0.0378671	0.277769
		0.0226424	0.125479
		0.0168683	0.0198179
		0.00483947	0.124352
		0	0.064749
		0.0311934	0
		0.0720442	0.0891269
		0.0976971	0.190887
		0.182082	0.328977
		0.239505	0.306798
		0.271271	0.350931
		0.315812	0.295714
		0.343637	0.287758
		0.520358	0.352158
		0.675589	0.322588
		0.722936	0.219459
		0.691426	0.271346
		0.650551	0.413893
		0.57876	0.376902
		0.579246	0.477781
		0.579444	0.621183
		0.631838	0.670362
		0.681299	0.861387
		0.71405	0.962183
		0.743339	0.925655
		0.747561	0.85555
		0.779388	0.7271
		0.800585	0.687072
		0.775872	0.769825
		0.819957	0.786649
		0.908448	0.825673
		1	1
		0.963296	0.879749
		0.960436	0.835835
		0.936152	0.67671
		0.916252	0.439965
		0.894235	0.330147
		0.939891	0.439665
		0.904188	0.331253
		0.904349	0.350723
		0.872224	0.44733
		0.84706	0.433673
		0.875793	0.463326
		0.910489	0.377205
		0.869455	0.304374
		0.780094	0.29807
		0.678508	0.391011
		0.543156	0.392694
		0.535403	0.266886
		0.493263	0.352926
		0.457818	0.326038
		0.40116	0.375213
		0.354041	0.398051
		0.277192	0.446292
		0.240316	0.387613
		0.199092	0.276822
		0.177967	0.271134
		0.0903036	0.420909
		0.0595776	0.267861
		0.0208457	0.29053
		0.0595534	0.3341
		0.0401582	0.219759
		0.0433751	0.227106
		0.0599201	0.198526
		0.0707318	0.225414
		0.119061	0.170606
		0.157084	0.3281
		0.120948	0.365496
		0.110511	0.323243
		0.108492	0.360091
		0.0991193	0.385526
		0.070258	0.342326
		0.0629331	0.247425
		0.117624	0.251636
		0.139278	0.307085
		0.179132	0.330199
		0.224778	0.389462
		0.263883	0.386837
		0.309899	0.477303
		0.355828	0.673856
		0.400693	0.895967
		0.454608	0.918556
		0.536999	0.864077
		0.648555	0.836232
		0.635999	0.74237
		0.650379	0.700595
		0.648012	0.617139
		0.626413	0.573675
		0.559494	0.520111
		0.585222	0.549115
		0.577767	0.60365
		0.693271	0.705688
		0.806976	1
		0.958422	0.900087
		1	0.823876
		0.884828	0.884483
		0.754203	0.643769
		0.691255	0.567428
		0.653653	0.57185
		0.599851	0.684259
		0.56118	0.606119
		0.542596	0.478428
		0.51813	0.578099
		0.571784	0.571011
		0.577352	0.407309
		0.611976	0.395081
		0.572926	0.456319
		0.549678	0.455394
		0.540695	0.404497
		0.519153	0.421712
		0.463696	0.34953
		0.385252	0.257227
		0.326076	0.265909
		0.242663	0.210484
		0.153416	0.181847
		0.124564	0.102083
		0.0831746	0.0841069
		0.0403885	0.0535264
		0	0.108176
		0.00605809	0
		0.0272378	0.115932
		0.026511	0.138647
		0.0365883	0.234745
		0.00820182	0.174423
		0.0379372	0.0750769
		0.0247896	0.220685
		0.0463884	0.200612
		0.112842	0.357155
		0.152185	0.465842
		0.22633	0.341932
		0.197436	0.315554
		0.120699	0.252925
		0.102792	0.115602
		0.143176	0.240793
		0.184624	0.0659722
		0.195856	0.260694
		0.188577	0.176655
		0.161617	0.367745
		0.149593	0.338554
		0.147586	0.213692
		0.2319	0.234965
		0.297806	0.272989
		0.342878	0.287293
		0.467105	0.299544
		0.616764	0.481787
		0.679472	0.540853
		0.779637	0.561994
		0.871171	0.553491
		0.978895	0.654741
		1	0.622296
		0.975234	0.513095
		0.909729	0.670759
		0.842462	0.73489
		0.788757	0.791258
		0.709417	0.844894
		0.678775	0.918288
		0.662436	0.963564
		0.618852	0.979775
		0.593062	0.87454
		0.556204	0.590919
		0.529193	0.45899
		0.509718	0.551539
		0.572533	0.688833
		0.658502	0.573896
		0.756819	0.801955
		0.802494	0.986657
		0.832206	0.989421
		0.901937	1
		0.900606	0.96088
		0.849393	0.85871
		0.76731	0.804861
		0.712538	0.680848
		0.645396	0.404882
		0.611934	0.307971
		0.616239	0.191096
		0.600758	0.182894
		0.517498	0.190005
		0.447807	0.317262
		0.363372	0.205308
		0.273527	0.128345
		0.168975	0
		0.0885979	0.0642427
		0.0173895	0.227675
		0.0351776	0.119113
		0	0.0802717
		0.00587809	0.153444
		0.00928525	0.15249
		0	0.116915
		0.00165641	0.107757
		0.0396256	0.188035
		0.12718	0.409454
		0.239342	0.519684
		0.294076	0.465908
		0.229888	0.451142
		0.1687	0.563371
		0.155197	0.537139
		0.159677	0.478708
		0.190764	0.517384
		0.245981	0.369878
		0.224073	0.379027
		0.255251	0.509083
		0.306299	0.423892
		0.334394	0.35206
		0.424256	0.402302
		0.495287	0.455677
		0.527864	0.470527
		0.575114	0.55683
		0.643921	0.541206
		0.724238	0.511259
		0.748211	0.478648
		0.804971	0.518697
		0.851982	0.537244
		0.890642	0.513236
		0.949161	0.486469
		0.95775	0.599896
		0.971514	0.851581
		1	0.831521
		0.900166	1
		0.837963	0.948563
		0.766101	0.845459
		0.820003	0.895407
		0.799531	0.823353
		0.742155	0.819226
		0.719446	0.849056
		0.636639	0.70324
		0.539925	0.510075
		0.446859	0.457483
		0.423941	0.411794
		0.415937	0.368345
		0.384432	0.554996
		0.375874	0.469493
		0.400627	0.344675
		0.447008	0.30759
		0.508644	0.26114
		0.559497	0.186213
		0.616316	0.199439
		0.668842	0.227209
		0.61005	0.184362
		0.56127	0.269166
		0.493022	0.254989
		0.482592	0.233969
		0.3543	0.152083
		0.252399	0.0523525
		0.180812	0.0475376
		0.118871	0.039808
		0.0885482	0.0810234
		0.0284818	0
		0.0111147	0.123658
		0.508393	0
		0.431368	0.0848266
		0.330594	0.238361
		0.232621	0.210041
		0.192481	0.333248
		0.0917882	0.211031
		0.0778937	0.282631
		0.0997406	0.223752
		0.107087	0.198705
		0.0853871	0.277194
		0.0208602	0.321259
		0.020492	0.208456
		0	0.216758
		0.0514644	0.427821
		0.079332	0.294891
		0.130693	0.276494
		0.266772	0.358068
		0.359058	0.416754
		0.497098	0.655277
		0.588837	0.771696
		0.713858	0.76331
		0.720379	0.974788
		0.690885	1
		0.566553	0.96346
		0.490898	0.951214
		0.500487	0.959829
		0.613074	0.889379
		0.802217	0.885528
		0.868664	0.664124
		1	0.66996
		0.976599	0.52377
		0.85353	0.559873
		0.732573	0.502703
		0.642564	0.571392
		0.58438	0.57043
		0.553257	0.589737
		0.59434	0.49495
		0.63742	0.301734
		0.605831	0.364805
		0.473783	0.451356
		0.35616	0.489718
		0.302412	0.41908
		0.317549	0.362988
		0.318435	0.318872
		0.333147	0.286654
		0.375429	0.394657
		0.431302	0.314719
		0.383416	0.397645
		0.36113	0.427387
		0.364976	0.24117
		0.417945	0.408633
		0.475096	0.255425
		0.569547	0.465478
		0.626068	0.534671
		0.718129	0.408435
		0.761295	0.416343
		0.709332	0.478645
		0.647262	0.393954
		0.606079	0.269817
		0.636259	0.277271
		0.570419	0.116398
		0.49039	0.000669562
		0.0397405	0.0693785
		0.0758501	0.196646
		0.134526	0.172465
		0.156948	0
		0.152394	0.0948174
		0.147626	0.223848
		0.212798	0.140506
		0.277261	0.144045
		0.413538	0.216861
		0.53912	0.281002
		0.645842	0.297632
		0.742366	0.430171
		0.819931	0.587214
		0.902265	0.846386
		0.913946	1
		1	0.883603
		0.978538	0.832072
		0.961374	0.877643
		0.972331	0.819863
		0.970202	0.645646
		0.89327	0.674308
		0.854416	0.703399
		0.791461	0.506988
		0.847329	0.524829
		0.882904	0.455737
		0.942786	0.73681
		0.931582	0.576049
		0.934941	0.415184
		0.915137	0.75102
		0.973598	0.522529
		0.89306	0.6944
		0.812659	0.610307
		0.733654	0.522002
		0.715193	0.604562
		0.75938	0.502423
		0.823435	0.510469
		0.832803	0.443578
		0.779861	0.461522
		0.679428	0.745096
		0.711225	0.646808
		0.819548	0.591273
		0.842561	0.495936
		0.836966	0.544367
		0.84472	0.538854
		0.944638	0.579658
		0.9736	0.610649
		0.953806	0.521982
		0.912641	0.505049
		0.818193	0.572099
		0.706948	0.511325
		0.569994	0.381564
		0.527365	0.31818
		0.435583	0.388328
		0.308726	0.369009
		0.220856	0.17901
		0.15167	0.225632
		0.0962271	0.214056
		0.064045	0.0883945
		0	0.134975
		0.0281711	0.294089
		0.0155628	0.267484
		0.0533041	0.0745528
		0.0596437	0.0584783
		0.0466927	0.125669
		0.0397728	0.00864413
		0.0558618	0.0196073
		0.0739632	0.104509
		0.040454	0.144542
		0	0.124363
		0.00894062	0.159442
		0.0709892	0.22432
		0.184399	0.254216
		0.312803	0.228217
		0.481809	0.158936
		0.598725	0.229522
		0.599911	0.162056
		0.606127	0.237956
		0.609863	0.246991
		0.614413	0.270237
		0.605163	0.30148
		0.574127	0.388673
		0.52526	0.429673
		0.482563	0.373899
		0.458827	0.40854
		0.484875	0.352531
		0.566991	0.356484
		0.641897	0.290282
		0.807366	0.273736
		0.903676	0.361548
		0.975519	0.363412
		1	0.368835
		0.932433	0.391083
		0.953679	0.436466
		0.915873	0.425123
		0.807701	0.425473
		0.717233	0.472525
		0.621609	0.475608
		0.599601	0.566449
		0.590937	0.507448
		0.553598	0.474795
		0.531218	0.474771
		0.47495	0.572646
		0.453488	0.636762
		0.430332	0.764755
		0.471974	1
		0.47663	0.906265
		0.406089	0.783441
		0.368418	0.512104
		0.388499	0.557824
		0.382148	0.332115
		0.410257	0.337967
		0.431956	0.296281
		0.448095	0.220127
		0.529601	0.272049
		0.555316	0.215841
		0.490301	0.209071
		0.452215	0.151496
		0.400606	0.151104
		0.284553	0.144915
		0.223763	0.0267352
		0.161648	0.12881
		0.0733983	0.108943
		0.0484954	0.0371293
		0.0415422	0
		0.038967	0.100238
		0.0492201	0.0299503
		0.0451084	0
		0.0523511	0.0287254
		0.0114053	0.124631
		0.000790149	0.124917
		0	0.240184
		0.00792267	0.209462
		0.0369336	0.221382
		0.0292927	0.28336
		0.0573313	0.325266
		0.0858212	0.187043
		0.139151	0.361947
		0.267543	0.451909
		0.450181	0.364118
		0.597626	0.319302
		0.667515	0.40634
		0.69772	0.422767
		0.69589	0.470672
		0.678791	0.560796
		0.663248	0.615346
		0.653955	0.58944
		0.652313	0.504389
		0.747068	0.647474
		0.808204	0.619468
		0.868727	0.681284
		0.951867	0.589643
		0.976315	0.559278
		0.934886	0.71303
		0.919375	0.825494
		0.875864	1
		0.821032	0.821893
		0.917761	0.832978
		0.964227	0.833036
		0.93453	0.720581
		0.923309	0.716881
		1	0.5788
		0.968153	0.51584
		0.954521	0.673127
		0.898408	0.818311
		0.805717	0.781
		0.710918	0.854143
		0.658124	0.875367
		0.602345	0.795575
		0.505935	0.919024
		0.449557	0.950062
		0.432637	0.735424
		0.429864	0.822237
		0.429949	0.639424
		0.47865	0.575671
		0.552666	0.324235
		0.454327	0.477686
		0.434897	0.605914
		0.375062	0.542239
		0.303362	0.392366
		0.253847	0.412593
		0.203829	0.426171
		0.169168	0.374684
		0.149923	0.284137
		0.0973641	0.218846
		0.0721599	0.105853
		0.0650803	0.0298842
		0.014293	0.12468
		0.019163	0.0534658
		0.0198753	0.028643
		0.00356474	0.160397
		0	0.230942
		0.00656717	0.240203
		0.0141073	0.300045
		0.039737	0.397996
		0.0567649	0.383704
		0.110831	0.271383
		0.113736	0.387038
		0.158563	0.259046
		0.222316	0.232085
		0.264605	0.201205
		0.278079	0.422713
		0.301125	0.436877
		0.315808	0.321295
		0.317224	0.556735
		0.305584	0.596372
		0.345233	0.745322
		0.38552	0.748647
		0.428019	0.849502
		0.439305	0.828629
		0.46938	0.864322
		0.536991	0.814559
		0.554019	0.610571
		0.583057	0.880384
		0.679814	0.62618
		0.784464	0.947005
		0.866942	0.958809
		0.939144	1
		0.983493	0.555974
		1	0.695844
		0.942461	0.888304
		0.909464	0.989273
		0.912908	0.825771
		0.882902	0.67967
		0.843842	0.733994
		0.836809	0.766305
		0.739072	0.915786
		0.580383	0.853064
		0.524196	0.959161
		0.476165	0.86736
		0.444192	0.70139
		0.372517	0.576243
		0.357818	0.525633
		0.319438	0.630411
		0.30529	0.58044
		0.295102	0.501374
		0.294701	0.28665
		0.304963	0.271191
		0.282983	0.282295
		0.267299	0.558213
		0.238473	0.436551
		0.177182	0.0671631
		0.150438	0.128549
		0.128489	0.0338149
		0.099552	0.189267
		0.0764102	0
		0.0184917	0.0387227
		0.0215878	0.0976291
		0.00183081	0.0478663
		0	0.117942
		0.0254889	0.279772
		0.0469156	0.249032
		0.0893877	0.225335
		0.11742	0.223507
		0.0934336	0.440226
		0.117167	0.493457
		0.150485	0.44539
		0.175729	0.440915
		0.198678	0.365823
		0.207632	0.481836
		0.207482	0.659201
		0.201503	0.56019
		0.19492	0.665908
		0.217969	0.516871
		0.239708	0.58337
		0.266251	0.568818
		0.281443	0.481157
		0.298805	0.324101
		0.30214	0.294779
		0.305301	0.368778
		0.337467	0.427817
		0.41335	0.46448
		0.513202	0.464455
		0.657238	0.488285
		0.785427	0.713069
		0.904848	0.804977
		1	0.869444
		0.97875	0.946813
		0.968615	1
		0.856707	0.836626
		0.834466	0.664435
		0.745136	0.564658
		0.704436	0.717736
		0.644219	0.561026
		0.627549	0.623605
		0.589811	0.562715
		0.621416	0.616204
		0.658898	0.872076
		0.738819	0.877865
		0.744951	0.860745
		0.637261	0.780785
		0.526257	0.677153
		0.417696	0.631954
		0.324325	0.636723
		0.26719	0.378102
		0.223267	0.271734
		0.192854	0.422485
		0.162182	0.242399
		0.16962	0.178228
		0.161803	0.190116
		0.126008	0.218211
		0.0802752	0.235215
		0.0729979	0.177946
		0.0531662	0.131221
		0.0345791	0.11991
		0.0117267	0
		0.00438712	0.104911
		0.021114	0.0580044
		0.0501265	0.0784253
		0.106257	0
		0.144307	0.0715521
		0.169377	0.186445
		0.176596	0.289908
		0.161483	0.181386
		0.150769	0.139217
		0.142996	0.213345
		0.114826	0.269487
		0.0620543	0.19896
		0.0664659	0.171936
		0.0790655	0.239742
		0.0618148	0.357268
		0.0900763	0.312013
		0.142871	0.255889
		0.157658	0.282077
		0.196233	0.368816
		0.211005	0.256849
		0.217479	0.28745
		0.253841	0.217074
		0.271997	0.447856
		0.318593	0.612914
		0.353542	0.84837
		0.394789	0.699573
		0.476185	0.744381
		0.552872	0.962433
		0.594635	1
		0.719645	0.977228
		0.787785	0.815052
		0.878589	0.745029
		0.915013	0.578126
		0.944541	0.504612
		0.933656	0.698756
		1	0.604822
		0.94356	0.616388
		0.898523	0.483784
		0.883697	0.585564
		0.858913	0.530189
		0.84356	0.285225
		0.866406	0.401375
		0.85715	0.520316
		0.791895	0.47028
		0.709738	0.550963
		0.57015	0.636389
		0.491669	0.548199
		0.471936	0.546545
		0.454079	0.640809
		0.465591	0.654839
		0.473868	0.433362
		0.421436	0.643351
		0.340784	0.447216
		0.285124	0.3049
		0.19387	0.362398
		0.127792	0.300938
		0.0857728	0.320591
		0.0491225	0.249921
		0	0.148404
		0.0206294	0.199559
		0.00903948	0.0850981
		0.0145477	0.0669994
		0.107084	0.32942
		0.0913252	0.352515
		0.0495278	0.561055
		0.052705	0.636863
		0.0532801	0.505637
		0.0444365	0.447618
		0.0361273	0.478378
		0.0256617	0.436289
		0.0124813	0.49269
		0	0.800993
		0.0271542	0.798767
		0.0726966	0.543784
		0.110734	0.492373
		0.117623	0.481976
		0.137868	0.492239
		0.174998	0.490901
		0.268035	0.477058
		0.33337	0.762144
		0.322451	0.833001
		0.373342	0.57713
		0.377514	0.705123
		0.362314	0.708672
		0.374011	0.623084
		0.382683	0.817665
		0.444698	1
		0.440444	0.91366
		0.494723	0.752745
		0.551679	0.728891
		0.644068	0.743892
		0.705968	0.697557
		0.778498	0.867606
		0.767286	0.632977
		0.798606	0.614581
		0.820499	0.442013
		0.9325	0.52644
		0.983803	0.610615
		0.998693	0.787222
		1	0.48642
		0.905681	0.508342
		0.777235	0.561773
		0.719165	0.663572
		0.61785	0.792026
		0.513871	0.65893
		0.465412	0.603741
		0.395664	0.357408
		0.334296	0.308205
		0.266303	0.329299
		0.258888	0.365525
		0.233371	0.630689
		0.205919	0.366011
		0.197527	0.0951413
		0.169555	0
		0.121601	0.437915
		0.155017	0.312622
		0.146778	0.294115
		0.128322	0.32435
		0.449235	0.662498
		0.493478	0.661539
		0.488618	0.145235
		0.502069	0.103379
		0.479342	0.690967
		0.394792	0.502387
		0.420363	0.711177
		0.336105	0.879351
		0.316206	1
		0.369529	0.724372
		0.463268	0.645835
		0.415996	0.839035
		0.481181	0.892872
		0.48414	0.86615
		0.50527	0.760216
		0.407693	0.685454
		0.368511	0.859954
		0.38254	0.573442
		0.364948	0.662309
		0.352979	0.682197
		0.401589	0.645516
		0.477823	0.641055
		0.459431	0.719055
		0.408054	0.730289
		0.385955	0.511808
		0.413722	0.674917
		0.449383	0.549209
		0.495986	0.488102
		0.587809	0.689877
		0.655558	0.58877
		0.720221	0.79386
		0.80136	0.590673
		0.788123	0.699992
		0.773022	0.60221
		0.757663	0.713458
		0.655973	0.609251
		0.547313	0.612046
		0.429804	0.564698
		0.345476	0.471355
		0.249799	0.31819
		0.196813	0.262205
		0.160299	0.796098
		0.063637	0.4372
		0.0368383	0.410335
		0.00920651	0.497424
		0.0425355	0.52104
		0	0.379876
		0.0665799	0.115755
		0.118642	0.281933
		0.154089	0.454772
		0.106213	0.0903057
		0.0955704	0.305163
		0.09108	0.379135
		0.123297	0
		0.21583	0.1745
		0.342131	0.228506
		0.55049	0.16589
		0.657533	0.476109
		0.816317	0.321142
		1	0.364998
		0.964405	0.323362
		0.849482	0.500719
		0.778802	0.684951
		0.615658	0.950388
		0.48918	0.692536
		0.368761	0.601843
		0.345542	0.508161
		0.317877	0.579669
		0.265663	0.711938
		0.269386	0.446775
		0.333425	0.533041
		0.430797	0.588296
		0.358238	0.389857
		0.288809	0.394407
		0.232198	0.479229
		0.291442	0.471255
		0.298374	0.314742
		0.251555	0.675772
		0.34438	0.427991
		0.223088	0.429339
		0.306877	0.195983
		0.255106	0.227643
		0.227075	0.117577
		0.280677	0.353576
		0.256254	0.0631505
		0.289669	0.109061
		0.170238	0.473019
		0.167674	0
		0.0785568	0.0694368
		0.0814481	0.174752
		0.0737046	0.232233
		0	0.179982
		0.076526	0.453467
		0.0882831	0.712498
		0.169233	0.532268
		0.108207	0.620492
		0.111129	0.530917
		0.142059	0.387893
		0.15365	0.519198
		0.195966	0.628228
		0.236631	0.701028
		0.285848	0.757661
		0.33803	0.87777
		0.419491	0.72277
		0.501668	0.854306
		0.627952	0.925987
		0.6096	0.837897
		0.547937	0.745648
		0.539748	0.880391
		0.505175	0.783988
		0.351818	0.769385
		0.24272	0.643784
		0.106316	0.872611
		0.0990313	0.982357
		0.0216668	0.926741
		0.00932445	0.862454
		0.0244183	0.675854
		0.0524658	0.644423
		0.0333584	0.60527
		0.183082	0.390165
		0.267928	0.337792
		0.365798	0.523298
		0.348953	0.506223
		0.282009	0.683511
		0.222407	1
		0.150008	0.878318
		0.142749	0.406635
		0.300985	0.383465
		0.36154	0.489035
		0.400108	0.649602
		0.444988	0.488701
		0.467436	0.597608
		0.501157	0.542251
		0.561218	0.366496
		0.578146	0.412244
		0.689184	0.483576
		0.773654	0.591176
		0.950644	0.578261
		1	0.726395
		0.899562	0.541072
		0.621982	0.360033
		0.508145	0.58495
		0.295513	0.68087
		0.281747	0.460301
		0.536212	0.543753
		0.62316	0.674301
		0.683611	0.425013
		0.629065	0.49455
		0.748782	0.557223
		0.719315	0.743655
		0.716734	0.983504
		0.632562	0.666096
		0.604697	0.663102
		0.586613	0.63936
		0.618903	0.66532
		0.583157	0.527417
		0.577321	0.476897
		0.55556	0.522173
		0.518229	0.325334
		0.485864	0.546013
		0.425208	0.523735
		0.399302	0.576678
		0.402272	0.660706
		0.435706	0.465395
		0.450218	1
		0.368101	0.904446
		0.385305	0.884393
		0.265741	0.852279
		0.263987	0.58066
		0.319339	0.653798
		0.28561	0.782676
		0.296219	0.787715
		0.396573	0.602818
		0.380227	0.616488
		0.42329	0.62734
		0.527552	0.556193
		0.566069	0.831679
		0.663741	0.708855
		0.797386	0.526358
		0.811819	0.468289
		0.851132	0.497566
		0.864243	0.327743
		0.835397	0.121908
		0.739284	0.237793
		0.6642	0.573675
		0.421936	0.529648
		0.258493	0.372362
		0.164834	0.610121
		0.238318	0.293239
		0.163196	0.239384
		0.16515	0.0690316
		0.110894	0.102417
		0.0944643	0.350744
		0.0686108	0.264705
		0.0131427	0.391191
		0	0.288776
		0.00185947	0.130586
		0.124026	0
		0.142489	0.0870404
		0.295809	0.0514701
		0.429711	0.117156
		0.52819	0.221733
		0.647433	0.328691
		0.743746	0.0991916
		0.69127	0.0598393
		0.721164	0.133527
		0.731256	0.00862729
		0.818478	0.242022
		0.898725	0.186443
		1	0.31698
		0.921049	0.368762
		0.798018	0.289726
		0.703027	0.288709
		0.714579	0.279079
[truncated: 4,395 more rows]

## Sheet: exp2 endosome1
	t19				t20				t21				t22				t23				t24				t25				t26				t27				t28				t29				t30				t31
	0	401.38	390.409		0	420.58	401.538		0	466.081	385.491		0	482.057	402.39		0	495.054	394.974		0	505.733	401.68		0	484.865	393.629		0	513.856	411.839		0	523.133	441.501		0	565.493	467.543		0	529.519	435.313		0	523.518	401.164		0
	0.10913	381.987	377.532		0.10913	396.708	393.177		0.10913	457.47	360.373		0.10913	476.22	413.996		0.10913	475.278	395.821		0.10913	479.45	401.962		0.10913	490.741	384.607		0.10913	498.39	412.337		0.10913	512.311	439.853		0.10913	539.643	436.645		0.10913	517.339	423.475		0.10913	511.156	410.19		0.10913
	0.21825	372.824	377.625		0.21825	380.601	413.048		0.21825	446.886	381.365		0.21825	470.936	395.381		0.21825	467.973	412.908		0.21825	480.146	387.699		0.21825	485.329	391.905		0.21825	492.219	421.909		0.21825	502.741	411.717		0.21825	524.906	444.455		0.21825	507.82	423.626		0.21825	510.177	412.821		0.21825
	0.32738	357.269	357.953		0.32738	368.946	416.935		0.32738	432.119	382.438		0.32738	443.093	389.504		0.32738	461.234	419.063		0.32738	492.555	385.067		0.32738	499.715	388.945		0.32738	470.91	413.275		0.32738	497.594	412.63		0.32738	520.805	432.849		0.32738	496.818	414.825		0.32738	483.736	431.216		0.32738
	0.43651	339.709	359.927		0.43651	344.233	419.81		0.43651	408.562	374.642		0.43651	426.69	385.261		0.43651	456.637	420.372		0.43651	482.517	391.789		0.43651	490.226	388.739		0.43651	504.007	396.292		0.43651	501.291	390.676		0.43651	494.638	432.442		0.43651	475.894	407.344		0.43651	449.771	434.691		0.43651
	0.54563	327.13	374.037		0.54563	351.029	415.841		0.54563	390.044	356.454		0.54563	412.048	375.344		0.54563	441.234	408.997		0.54563	476.55	392.1		0.54563	487.071	389.732		0.54563	500.591	409.185		0.54563	486.16	413.518		0.54563	484.616	418.359		0.54563	462.089	412.771		0.54563	431.922	444.004		0.54563
	0.65476	333.084	355.262		0.65476	340.644	391.941		0.65476	374.913	365.06		0.65476	407.233	366.999		0.65476	420.658	392.642		0.65476	481.045	385.353		0.65476	482.224	392.95		0.65476	506.421	395.035		0.65476	486.423	401.37		0.65476	468.828	415.881		0.65476	451.912	395.268		0.65476	414.273	443.791		0.65476
	0.76389	319.129	356.947		0.76389	332.232	394.804		0.76389	374.338	382.574		0.76389	397.57	365.151		0.76389	412.854	372.554		0.76389	485.825	402.593		0.76389	459.155	393.725		0.76389	483.939	402.514		0.76389	480.781	400.077		0.76389	447.977	411.908		0.76389	433.738	406.641		0.76389	423.543	421.65		0.76389
	0.87302	317.814	355.321		0.87302	332.113	373.867		0.87302	371.195	378.31		0.87302	385.137	359.984		0.87302	396.75	362.032		0.87302	475.942	398.167		0.87302	440.556	389.17		0.87302	486.417	410.796		0.87302	468.946	389.165		0.87302	435.721	405.755		0.87302	436.372	394.209		0.87302	400.935	405.525		0.87302
	0.98214	316.213	353.159		0.98214	320.176	369.776		0.98214	357.957	398.477		0.98214	383.465	353.739		0.98214	389.068	368.329		0.98214	444.099	392.234		0.98214	426.499	370.25		0.98214	488.4	416.201		0.98214	469.191	398.314		0.98214	414.683	401.693		0.98214	424.251	393.104		0.98214	399.471	407.338		0.98214
	1.09127	304.661	351.682		1.09127	326.863	361.018		1.09127	341.371	439.867		1.09127	365.323	353.818		1.09127	390.708	365.769		1.09127	416.998	376.057		1.09127	419.531	366.519		1.09127	467.072	421.024		1.09127	463.675	399.901		1.09127	426.056	399.043		1.09127	429.69	395.51		1.09127	376.715	400.916		1.09127
	1.2004	303.603	347.436		1.2004	322.601	354.742		1.2004	330.431	451.145		1.2004	360.901	348.125		1.2004	382.944	369.988		1.2004	415.679	364.729		1.2004	410.503	359.325		1.2004	460.057	414.152		1.2004	445.472	388.4		1.2004	431.028	393.238		1.2004	432.313	374.122		1.2004	379.669	394.308		1.2004
	1.30952	299.908	347.355		1.30952	308.158	357.744		1.30952	334.652	474.265		1.30952	353.712	351.836		1.30952	375.543	372.008		1.30952	402.736	353.8		1.30952	403.996	359.315		1.30952	432.09	398.609		1.30952	436.213	375.98		1.30952	424.583	398.658		1.30952	426.873	379.557		1.30952	398.722	387.807		1.30952
	1.41865	293.486	345.198		1.41865	296.485	343.738		1.41865	316.126	453.246		1.41865	356.917	356.299		1.41865	380.508	367.362		1.41865	394.764	359.019		1.41865	395.511	348.016		1.41865	428.469	394.974		1.41865	436.007	370.893		1.41865	416.062	405.038		1.41865	416.84	384.472		1.41865	409.972	386.587		1.41865
	1.52778	301.3	336.7		1.52778	295.665	351.605		1.52778	310.568	428.857		1.52778	353.157	354.63		1.52778	386.883	365.07		1.52778	388.619	352.947		1.52778	381.989	349.604		1.52778	424.209	378.636		1.52778	431.847	365.903		1.52778	411.812	387.084		1.52778	404.564	387.415		1.52778	418.393	390.697		1.52778
	1.6369	299.792	349.343		1.6369	298.032	347.377		1.6369	306.804	408.393		1.6369	338.733	351.172		1.6369	396.985	370.457		1.6369	381.835	353.211		1.6369	375.618	341.846		1.6369	414.348	365.684		1.6369	423.784	377.299		1.6369	420.394	387.951		1.6369	406.03	382.418		1.6369	438.164	394.912		1.6369
	1.74603	287.083	342.607		1.74603	300.36	344.06		1.74603	309.161	384.548		1.74603	335.437	355.652		1.74603	379.269	358.649		1.74603	380.044	351.635		1.74603	378.812	364.678		1.74603	396.99	357.856		1.74603	418.305	368.14		1.74603	423.356	396.853		1.74603	393.522	381.189		1.74603	435.173	381.187		1.74603
	1.85516	283.561	338.186		1.85516	298.79	360.029		1.85516	306.136	358.733		1.85516	337.148	341.972		1.85516	363.323	357.866		1.85516	366.989	353.165		1.85516	363.657	358.884		1.85516	397.954	368.842		1.85516	427.547	365.209		1.85516	428.715	399.591		1.85516	392.105	370.702		1.85516	404.687	373.51		1.85516
	1.96429	281.483	341.703		1.96429	302.33	352.227		1.96429	305.003	352.802		1.96429	331.729	336.079		1.96429	372.107	357.44		1.96429	365.247	362.008		1.96429	366.141	348.262		1.96429	383.832	376.103		1.96429	427.367	363.133		1.96429	436.013	397.648		1.96429	405.707	379.082		1.96429	399.327	368.537		1.96429
	2.07341	282.397	345.044		2.07341	295.742	352.4		2.07341	304.139	350.344		2.07341	333.534	343.654		2.07341	389.329	350.046		2.07341	365.943	363.653		2.07341	356.336	360.374		2.07341	380.108	368.072		2.07341	414.449	370.226		2.07341	448.238	384.655		2.07341	414.218	378.236		2.07341	390.576	364.587		2.07341
	2.18254	285.336	353.068		2.18254	293.51	349.388		2.18254	302.259	351.929		2.18254	326.009	353.001		2.18254	385.393	355.548		2.18254	372.83	371.462		2.18254	349.296	363.111		2.18254	382.79	368.713		2.18254	409.815	376.309		2.18254	450.538	384.048		2.18254	401.545	374.693		2.18254	406.367	362.284		2.18254
	2.29167	279.85	348.956		2.29167	292.16	354.174		2.29167	302.162	349.316		2.29167	322.658	352.978		2.29167	386.756	359.47		2.29167	371.791	380.966		2.29167	352.109	364.262		2.29167	374.921	374.091		2.29167	403.736	387.519		2.29167	453.594	392.35		2.29167	431.794	381.678		2.29167	422.452	344.681		2.29167
	2.40079	280.982	334.651		2.40079	287.929	353.354		2.40079	301.716	354.644		2.40079	332.499	346.639		2.40079	378.643	360.115		2.40079	371.651	381.123		2.40079	355.082	373.303		2.40079	374.662	382.516		2.40079	400.93	397.582		2.40079	452.389	405.105		2.40079	465.113	384.928		2.40079	460.902	348.495		2.40079
	2.50992	277.997	329.724		2.50992	292.022	347.672		2.50992	303.261	352.734		2.50992	329.34	358.264		2.50992	371.972	357.6		2.50992	369.765	381.954		2.50992	352.676	375.462		2.50992	377.869	379.044		2.50992	404.827	401.277		2.50992	462.905	400.442		2.50992	495.472	379.178		2.50992	480.633	352.333		2.50992
	2.61905	283.346	341.696		2.61905	290.117	344.322		2.61905	308.987	361.658		2.61905	333.836	362.817		2.61905	369.409	360.327		2.61905	373.823	387.604		2.61905	354.72	371.55		2.61905	393.2	380.608		2.61905	400.016	398.895		2.61905	447.821	396.288		2.61905	514.358	369.033		2.61905	469.805	347.212		2.61905
	2.72817	286.577	347.663		2.72817	290.439	343.457		2.72817	310.104	358.992		2.72817	336	363.529		2.72817	361.174	366.919		2.72817	381.63	388.717		2.72817	369.198	376.566		2.72817	391.57	390.993		2.72817	396.039	392.745		2.72817	444.005	402.546		2.72817	542.644	363.531		2.72817	480.456	350.81		2.72817
	2.8373	286.717	338.704		2.8373	303.125	354.631		2.8373	311.093	355.284		2.8373	344.568	354.889		2.8373	361.049	366.337		2.8373	379.677	387.748		2.8373	371.668	370.524		2.8373	391.695	405.24		2.8373	393.359	392.056		2.8373	449.775	405.369		2.8373	545.625	379.873		2.8373	487.485	345.23		2.8373
	2.94643	284.737	335.733		2.94643	310.943	365.131		2.94643	315.72	365.868		2.94643	349.135	353.684		2.94643	368.012	363.368		2.94643	388.478	368.974		2.94643	382.466	374.105		2.94643	404.087	400.297		2.94643	393.263	393.211		2.94643	441.668	399.01		2.94643	534.13	369.014		2.94643	477.285	350.304		2.94643
	3.05556	284.591	348.523		3.05556	321.015	362.484		3.05556	323.716	359.178		3.05556	353.261	355.36		3.05556	367.908	360.586		3.05556	394.398	375.673		3.05556	395.889	371.67		3.05556	399.23	403.866		3.05556	404.866	392.471		3.05556	445.014	403.526		3.05556	533.113	366.288		3.05556	464.143	356.358		3.05556
	3.16468	290.093	331.158		3.16468	321.711	364.345		3.16468	331.542	366.984		3.16468	354.627	362.11		3.16468	376.908	368.234		3.16468	396.739	371.645		3.16468	386.592	367.257		3.16468	416.081	416.451		3.16468	412.026	394.029		3.16468	454.507	394.919		3.16468	503.142	362.592		3.16468	447.193	353.873		3.16468
	3.27381	288.663	350.294		3.27381	333.839	356.081		3.27381	337.303	367.931		3.27381	368.758	358.781		3.27381	385.168	379.792		3.27381	405.192	377.059		3.27381	399.659	377.722		3.27381	419.904	410.167		3.27381	434.658	383.888		3.27381	451.776	389.995		3.27381	466.904	359.755		3.27381	439.533	349.107		3.27381
	3.38294	310.808	352.835		3.38294	349.344	350.962		3.38294	349.06	364.32		3.38294	373.03	351		3.38294	384.633	391.225		3.38294	407.298	384.809		3.38294	412.319	373.099		3.38294	442.943	409.711		3.38294	450.662	392.191		3.38294	469.605	390.392		3.38294	461.585	371.196		3.38294	426.71	353.883		3.38294
	3.49206	317.329	353.435		3.49206	351.52	348.05		3.49206	349.653	374.959		3.49206	379.785	359.315		3.49206	394.874	393.735		3.49206	404.475	390.984		3.49206	414.764	366.492		3.49206	449.465	409.324		3.49206	455.5	389.054		3.49206	468.919	404.519		3.49206	447.895	367.293		3.49206	420.675	343.917		3.49206
	3.60119	324.075	354.227		3.60119	365.841	359.272		3.60119	378.67	365.959		3.60119	395.148	367.892		3.60119	396.781	393.174		3.60119	416.15	378.389		3.60119	425.787	372.32		3.60119	468.289	402.853		3.60119	473.255	393.775		3.60119	462.462	396.608		3.60119	430.45	367.661		3.60119	403.491	340.32		3.60119
	3.71032	329.889	355.998		3.71032	379.328	363.052		3.71032	360.942	362.339		3.71032	414.465	359.596		3.71032	412.513	388.77		3.71032	432.782	377.691		3.71032	445.055	382.038		3.71032	477.624	408.186		3.71032	491.894	382.318		3.71032	459.047	398.297		3.71032	444.514	364.027		3.71032	412.672	323.319		3.71032
	3.81944	331.826	358.449		3.81944	383.427	369.329		3.81944	379.235	350.416		3.81944	434.781	369.31		3.81944	419.988	390.186		3.81944	452.604	389.378		3.81944	454.114	389.66		3.81944	499.224	407.478		3.81944	495.655	374.077		3.81944	455.645	398.53		3.81944	442.277	364.053		3.81944	415.224	326.006		3.81944
	3.92857	339.257	333.289		3.92857	401.819	361.445		3.92857	385.166	339.434		3.92857	457.567	371.692		3.92857	440.224	368.042		3.92857	451.726	386.421		3.92857	464.032	399.437		3.92857	515.341	401.638		3.92857	494.505	381.198		3.92857	454.827	391.442		3.92857	443.762	365.724		3.92857	413.477	332.318		3.92857
	4.0377	350.377	330.735		4.0377	403.765	355.779		4.0377	382.643	350.473		4.0377	452.422	379.853		4.0377	449.841	362.826		4.0377	465.105	386.156		4.0377	460.314	390.977		4.0377	530.438	384.84		4.0377	512.061	391.213		4.0377	463.69	395.529		4.0377	454.337	350.763		4.0377	405.342	325.825		4.0377
	4.14683	354.229	341.681		4.14683	412.405	357.655		4.14683	385.98	337.787		4.14683	472.988	387.97		4.14683	447.329	357.842		4.14683	469.206	379.853		4.14683	459.445	376.039		4.14683	528.048	371.006		4.14683	520.831	388.718		4.14683	477.29	398.185		4.14683	472.088	361.427		4.14683	417.244	325.327		4.14683
	4.25595	374.548	346.014		4.25595	398.064	362.782		4.25595	381.875	326.996		4.25595	480.223	409.007		4.25595	454.287	356.689		4.25595	489.367	385.345		4.25595	452.898	380.337		4.25595	506.961	381.621		4.25595	510.752	385.909		4.25595	488.257	396.327		4.25595	484.182	362.552		4.25595	424.516	336.924		4.25595
	4.36508	371.466	342.286		4.36508	382.515	365.475		4.36508	363.644	350.801		4.36508	469.347	417.589		4.36508	440.35	348.538		4.36508	491.018	378.025		4.36508	451.301	382.783		4.36508	478.87	393.068		4.36508	502.881	378.995		4.36508	486.227	392.365		4.36508	501.676	360.402		4.36508	418.162	336.212		4.36508
	4.47421	384.595	341.195		4.47421	374.255	357.853		4.47421	357.338	350.333		4.47421	462.418	412.156		4.47421	439.944	345.91		4.47421	502.938	387.849		4.47421	448.497	372.424		4.47421	474.317	389.22		4.47421	507.233	399.931		4.47421	487.393	389.556		4.47421	511.111	364.266		4.47421	435.611	336.101		4.47421
	4.58333	377.038	339.308		4.58333	374.701	351.074		4.58333	384.3	328.896		4.58333	445.737	380.011		4.58333	445.903	360.017		4.58333	515.03	387.205		4.58333	459.241	370.691		4.58333	466.452	380.922		4.58333	522.43	382.111		4.58333	491.876	387.312		4.58333	513.222	358.287		4.58333	459.201	329.45		4.58333
	4.69246	370.79	348.744		4.69246	378.909	350.556		4.69246	377.318	332.906		4.69246	442.381	365.526		4.69246	449.127	367.555		4.69246	498.579	372.167		4.69246	452.468	365.768		4.69246	460.71	398.01		4.69246	529.247	379.095		4.69246	501.983	382.197		4.69246	510.112	358.359		4.69246	480.16	337.177		4.69246
	4.80159	364.5	345.928		4.80159	374.106	347.306		4.80159	380.951	343.461		4.80159	434.823	359.454		4.80159	432.375	370.169		4.80159	474.123	367.135		4.80159	435.186	364.811		4.80159	463.578	387.215		4.80159	538.117	391.737		4.80159	505.25	380.967		4.80159	498.761	356.983		4.80159	488.867	344.412		4.80159
	4.91071	355.015	338.691		4.91071	364.879	349.7		4.91071	385.301	350.332		4.91071	429.404	365.802		4.91071	439.912	372.861		4.91071	462.143	372.79		4.91071	437.638	360.778		4.91071	461.497	392.682		4.91071	531.839	367.409		4.91071	504.414	388.498		4.91071	482.051	361.278		4.91071	507.772	336.586		4.91071
	5.01984	348.07	337.735		5.01984	360.803	364.451		5.01984	374.956	339.66		5.01984	415.322	361.045		5.01984	424.701	362.438		5.01984	450.948	371.264		5.01984	436.646	366.731		5.01984	464.205	399.411		5.01984	534.826	382.134		5.01984	511.275	388.394		5.01984	488.316	365.395		5.01984	498.285	345.541		5.01984
	5.12897	349.723	336.16		5.12897	357.705	368.324		5.12897	370.357	334.296		5.12897	399.058	355.789		5.12897	418.39	362.73		5.12897	431.565	373.11		5.12897	443.503	351.642		5.12897	465.046	386.959		5.12897	507.227	386.053		5.12897	522.481	396.339		5.12897	493.249	373.141		5.12897	484.175	353.129		5.12897
	5.2381	336.866	343.394		5.2381	373.562	367.729		5.2381	376.334	336.227		5.2381	390.393	373.258		5.2381	415.592	354.675		5.2381	440.649	382.441		5.2381	443.753	363.004		5.2381	471.814	403.535		5.2381	502.924	379.133		5.2381	526.929	399.418		5.2381	490.375	381.671		5.2381	484.782	360.895		5.2381
	5.34722	327.057	349.371		5.34722	372.609	360.087		5.34722	372.021	339.788		5.34722	394.459	371.92		5.34722	425.539	350.321		5.34722	459.152	379.727		5.34722	454.599	361.788		5.34722	483.476	416.014		5.34722	505.228	393.201		5.34722	532.487	396.211		5.34722	501.417	389.007		5.34722	485.377	372.699		5.34722
	5.45635	332.143	338.708		5.45635	373.932	347.586		5.45635	370.888	345.172		5.45635	398.087	366.613		5.45635	418.614	354.811		5.45635	460.612	367.094		5.45635	467.072	356.69		5.45635	484.478	401.496		5.45635	519.856	397.53		5.45635	540.973	401.271		5.45635	492.557	380.544		5.45635	474.375	363.388		5.45635
	5.56548	358.645	338.189		5.56548	371.276	358.904		5.56548	375.859	334.358		5.56548	390.095	365.159		5.56548	423.427	355.143		5.56548	471.188	384.224		5.56548	477.325	361.997		5.56548	492.305	411.165		5.56548	496.402	389.386		5.56548	529.905	407.488		5.56548	509.61	386.53		5.56548	490.788	365.318		5.56548
	5.6746	369.09	345.539		5.6746	383.561	342.663		5.6746	377.29	343.051		5.6746	411.305	372.88		5.6746	431.536	362.58		5.6746	495.599	387.691		5.6746	466.129	362.478		5.6746	489.854	401.553		5.6746	508.367	385.181		5.6746	535.031	409.095		5.6746	528.354	385.157		5.6746	492.821	378.263		5.6746
	5.78373	388.584	353.726		5.78373	373.055	348.514		5.78373	387.843	344.882		5.78373	406.926	374.812		5.78373	446.123	358.043		5.78373	488.331	382.452		5.78373	465.916	370.017		5.78373	489.017	415.796		5.78373	496.744	379.729		5.78373	512.179	412.248		5.78373	533.518	387.119		5.78373	496.022	383.383		5.78373
	5.89286	386.031	346.421		5.89286	372.776	357.057		5.89286	395.342	342.9		5.89286	418.201	370.047		5.89286	460.597	368.358		5.89286	500.806	378.997		5.89286	476.759	368.634		5.89286	485.895	416.688		5.89286	508.04	399.051		5.89286	514.62	412.702		5.89286	522.784	402.024		5.89286	491.293	380.904		5.89286
	6.00198	383.691	357.003		6.00198	395.183	365.424		6.00198	401.594	354.589		6.00198	440.648	365.763		6.00198	475.688	370.729		6.00198	502.69	388.551		6.00198	500.554	375.993		6.00198	488.859	409.507		6.00198	512.859	414.488		6.00198	517.254	412.782		6.00198	501.9	393.94		6.00198	486.557	372.278		6.00198
	6.11111	377.171	359.978		6.11111	392.472	357.417		6.11111	411.813	354.942		6.11111	443.923	381.381		6.11111	482.578	374.128		6.11111	499.414	392.099		6.11111	493.664	383.35		6.11111	506.27	413.31		6.11111	506.839	410.049		6.11111	507.399	421.267		6.11111	489.248	388.003		6.11111	469.261	378.025		6.11111
	6.22024	383.703	364.341		6.22024	385.719	362.352		6.22024	423.798	352.824		6.22024	441.943	371.488		6.22024	490.351	382.248		6.22024	509.85	397.587		6.22024	488.026	397.7		6.22024	508.799	412.231		6.22024	511.585	398.232		6.22024	509.218	414.877		6.22024	480.758	386.358		6.22024	455.366	381.646		6.22024
	6.32937	376.078	364.842		6.32937	381.92	358.722		6.32937	413.131	358.926		6.32937	467.733	380.544		6.32937	503.862	372.13		6.32937	515.084	389.877		6.32937	495.943	402.547		6.32937	513.438	432.129		6.32937	493.778	409.32		6.32937	517.904	410.277		6.32937	462.964	392.998		6.32937	453.947	380.697		6.32937
	6.43849	392.721	378.18		6.43849	398.42	356.696		6.43849	420.058	351.047		6.43849	470.89	389.143		6.43849	507.565	382.703		6.43849	493.164	391.543		6.43849	475.903	418.482		6.43849	518.002	439.038		6.43849	485.704	401.785		6.43849	510.312	420.464		6.43849	475.053	391.363		6.43849	463.758	374.061		6.43849
	6.54762	402.639	383.107		6.54762	403.863	372.322		6.54762	423.851	357.398		6.54762	476.551	402.227		6.54762	512.401	386.946		6.54762	510.657	419.019		6.54762	479.309	430.752		6.54762	538.888	440.184		6.54762	492.708	397.59		6.54762	512.515	421.791		6.54762	476.016	402.252		6.54762	445.485	372.356		6.54762
	6.65675	414.184	376.263		6.65675	404.336	376.248		6.65675	449.612	361.495		6.65675	479.753	411.512		6.65675	500.961	393.024		6.65675	488.195	415.051		6.65675	476.268	431.088		6.65675	527.27	447.968		6.65675	499.118	397.326		6.65675	488.614	420.725		6.65675	473.893	389.907		6.65675	461.478	385.963		6.65675
	6.76587	430.338	396.159		6.76587	409.392	374.149		6.76587	447.24	381.315		6.76587	471.122	419.118		6.76587	499.229	399.883		6.76587	488.047	417.257		6.76587	483.11	438.704		6.76587	523.766	428.802		6.76587	491.718	399.905		6.76587	503.954	430.401		6.76587	470.763	383.549		6.76587	472.155	387.583		6.76587
	6.875	439.59	395.642		6.875	425.975	392.532		6.875	460.42	377.728		6.875	469.163	425.028		6.875	499.662	397.963		6.875	488.544	433.712		6.875	479.44	454.574		6.875	510.068	427.424		6.875	489.393	399.833		6.875	507.437	442.748		6.875	477.131	396.174		6.875	470.534	375.85		6.875
	6.98413	435.356	402.723		6.98413	436.916	390.597		6.98413	438.476	383.963		6.98413	460.983	433.493		6.98413	493.183	419.649		6.98413	473.356	442.642		6.98413	478.429	455.355		6.98413	506.028	425.997		6.98413	505.351	415.386		6.98413	506.703	468.969		6.98413	477.105	401.885		6.98413	498.522	378.726		6.98413
	7.09325	456.822	387.81		7.09325	432.307	402.986		7.09325	439.215	389.611		7.09325	454.457	438.806		7.09325	486.779	424.675		7.09325	465.187	434.091		7.09325	489.061	450.495		7.09325	505.551	433.334		7.09325	498.697	419.243		7.09325	521.312	479.842		7.09325	481.541	402.087		7.09325	517.168	381.098		7.09325
	7.20238	436.614	391.652		7.20238	432.145	411.671		7.20238	444.644	394.671		7.20238	450.748	450.477		7.20238	485.266	443.291		7.20238	482.678	445.54		7.20238	511.185	438.029		7.20238	520.227	445.29		7.20238	512.75	427.804		7.20238	548.751	486.082		7.20238	504.264	392.517		7.20238	526.743	384.953		7.20238
	7.31151	443.486	399.119		7.31151	431.264	419.457		7.31151	453.383	404.785		7.31151	450.775	441.655		7.31151	498.16	444.224		7.31151	500.427	468.205		7.31151	525.931	448.192		7.31151	547.855	454.661		7.31151	524.398	433.379		7.31151	576.428	472.674		7.31151	529.566	400.747		7.31151	547.884	382.547		7.31151
	7.42063	438.22	409.41		7.42063	445.558	426.759		7.42063	448.299	424.852		7.42063	465.773	451.366		7.42063	508.321	465.086		7.42063	514.89	482.845		7.42063	542.258	440.585		7.42063	564.731	465.575		7.42063	534.127	439.919		7.42063	602.35	459.893		7.42063	558.194	414.875		7.42063	570.453	390.816		7.42063
	7.52976	427.144	406.301		7.52976	463.232	428.606		7.52976	470.293	431.747		7.52976	467.05	450.504		7.52976	506.155	472.052		7.52976	535.425	485.39		7.52976	543.678	423.656		7.52976	574.831	474.845		7.52976	573.724	441.719		7.52976	637.739	469.209		7.52976	575.076	403.54		7.52976	589.082	384.657		7.52976
	7.63889	418.581	398.596		7.63889	468.142	449.774		7.63889	468.155	430.849		7.63889	474.205	432.959		7.63889	519.965	476.666		7.63889	549.365	486.773		7.63889	566.084	426.137		7.63889	624.698	465.902		7.63889	591.715	439.163		7.63889	644.234	475.014		7.63889	595.249	398.616		7.63889	585.014	400.436		7.63889
	7.74802	437.778	399.714		7.74802	467.118	451.163		7.74802	464.233	430.174		7.74802	482.573	447.146		7.74802	521.718	471.337		7.74802	559.235	481.662		7.74802	568.186	436.358		7.74802	639.93	454.007		7.74802	586.987	445.015		7.74802	649.385	479.991		7.74802	590.071	396.346		7.74802	583.354	399.057		7.74802
	7.85714	429.86	409.31		7.85714	480.566	468.81		7.85714	469.21	432.634		7.85714	485.201	425.797		7.85714	524.487	467.649		7.85714	569.805	489.109		7.85714	556.219	430.021		7.85714	658.29	468.679		7.85714	605.873	448.801		7.85714	653.371	479.518		7.85714	595.508	404.997		7.85714	592.066	399.608		7.85714
	7.96627	435.606	418.213		7.96627	454.841	473.705		7.96627	465.815	424.978		7.96627	491.714	420.959		7.96627	519.589	460.518		7.96627	557.473	477.668		7.96627	532.537	436.77		7.96627	651.642	478.387		7.96627	600.048	454.294		7.96627	629.828	480.73		7.96627	577.481	407.743		7.96627	609.397	388.916		7.96627
	8.0754	440.281	444.349		8.0754	470.79	457.156		8.0754	469.361	426.024		8.0754	502.342	409.517		8.0754	527.543	446.796		8.0754	542.744	470.917		8.0754	510.375	426.884		8.0754	627.919	471.068		8.0754	600.256	457.459		8.0754	630.216	480.939		8.0754	593.778	403.109		8.0754	603.437	397.911		8.0754
	8.18452	446.481	447.628		8.18452	475.164	453.297		8.18452	488.068	418.15		8.18452	497.498	405.023		8.18452	527.16	436.413		8.18452	528.857	453.666		8.18452	516.584	414.328		8.18452	606.57	458.123		8.18452	583.074	469.631		8.18452	639.11	476.061		8.18452	607.044	412.884		8.18452	598.384	401.642		8.18452
	8.29365	441.086	445.557		8.29365	468.86	444.097		8.29365	475.095	404.674		8.29365	488.367	397.039		8.29365	540.435	417.881		8.29365	530.33	440.552		8.29365	504.445	405.299		8.29365	588.732	454.932		8.29365	583.224	480.624		8.29365	641.682	475.764		8.29365	597.121	416.431		8.29365	589.464	400.849		8.29365
	8.40278	442.902	452.63		8.40278	469.177	423.101		8.40278	460.529	394.194		8.40278	488.719	391.152		8.40278	521.12	414.172		8.40278	538.42	436.348		8.40278	502.173	406.864		8.40278	571.385	450.57		8.40278	594.258	487.086		8.40278	624.636	470.76		8.40278	577.443	407.552		8.40278	578.689	401.911		8.40278
	8.5119	448.759	452.309		8.5119	465.587	415.035		8.5119	462.512	376.789		8.5119	494.98	391.62		8.5119	526.732	401.053		8.5119	519.076	437.676		8.5119	487.319	393.712		8.5119	569.056	438.904		8.5119	575.344	489.018		8.5119	615.305	494.652		8.5119	568.608	412.116		8.5119	564.757	403.026		8.5119
	8.62103	438.561	430.58		8.62103	457.032	391.53		8.62103	456.752	382.261		8.62103	488.038	378.407		8.62103	506.713	390.393		8.62103	523.315	422.756		8.62103	488.629	394.116		8.62103	563.347	436.844		8.62103	559.978	502.056		8.62103	607.998	487.67		8.62103	564.284	404.371		8.62103	548.166	401.482		8.62103
	8.73016	419.263	408.346		8.73016	436.817	393.396		8.73016	466.154	370.7		8.73016	481.238	392.64		8.73016	506.271	403.681		8.73016	498.197	421.362		8.73016	487.255	394.026		8.73016	533.118	428.635		8.73016	552.094	481.03		8.73016	601.982	482.85		8.73016	555.007	419.618		8.73016	557.507	383.643		8.73016
	8.83929	406.622	392.789		8.83929	430.977	387.74		8.83929	460.382	377.888		8.83929	485.553	389.98		8.83929	504.535	394.668		8.83929	507.534	402.068						8.83929	513.333	417.267		8.83929	555.441	464.608		8.83929	596.957	496.745		8.83929	532.069	419.788		8.83929	536.784	402.745		8.83929
	8.94841	403.793	390.619		8.94841	421.514	400.386		8.94841	466.034	384.864		8.94841	484.103	404.675		8.94841	494.747	396.053										8.94841	514.488	414.212		8.94841	524.891	442.61		8.94841	585.277	474.602		8.94841	533.325	422.845		8.94841	542.831	398.454		8.94841
																																					9.05754	558.615	471.022		9.05754	530.947	435.955		9.05754	523.674	401.717		9.05754
																																					9.16667	566.782	466.53
[truncated: 80 more columns]

## Sheet: exp2 endosome2
	t19				t20				t21				t22				t23				t24				t25				t26				t27				t28				t29				t30				t31
	0	437.288	392.414		0	492.574	453.996		0	479.258	402.464		0	490.337	393.374		0	605.32	425.463		0	573.925	548.795		0	502.491	509.215		0	498.589	446.299		0	509.485	439.181		0	466.899	436.61		0	422.882	379.497		0	404.928	364.149		0
	0.10913	433.926	386.414		0.10913	503.636	486.23		0.10913	486.326	401.779		0.10913	478.29	393.335		0.10913	583.07	422.508		0.10913	559.753	556.953		0.10913	496.575	501.644		0.10913	493.273	449.122		0.10913	484.411	429.807		0.10913	479.509	442.266		0.10913	427.534	382.839		0.10913	405.577	348.393		0.10913
	0.21825	419.727	391.743		0.21825	523.068	524.117		0.21825	505.565	397.943		0.21825	474.309	385.497		0.21825	552.78	415.529		0.21825	533.107	537.111		0.21825	490.177	484.531		0.21825	486.475	457.28		0.21825	469.078	414.628		0.21825	480.853	448.676		0.21825	433.801	377.654		0.21825	392.679	348.373		0.21825
	0.32738	403.432	385.646		0.32738	549.187	557.523		0.32738	519.721	404.84		0.32738	469.751	390.071		0.32738	529.139	415.283		0.32738	541.114	516.323		0.32738	523.261	490.587		0.32738	498.024	460.345		0.32738	484.748	415.396		0.32738	485.725	460.337		0.32738	443.688	379.271		0.32738	387.214	347.894		0.32738
	0.43651	410.295	401.372		0.43651	556.769	550.731		0.43651	529.566	399.884		0.43651	459.825	395.437		0.43651	498.338	407.752		0.43651	544.034	493.397		0.43651	554.85	489.413		0.43651	538.94	478.393		0.43651	501.938	419.658		0.43651	492.71	470.978		0.43651	437.54	374.59		0.43651	381.201	348.878		0.43651
	0.54563	412.853	423.512		0.54563	531.994	567.273		0.54563	532.137	397.855		0.54563	460.77	402.946		0.54563	473.165	404		0.54563	541.979	462.792		0.54563	552.897	496.198		0.54563	577.63	482.476		0.54563	534.969	419.31		0.54563	474.307	490.149		0.54563	425.353	364.628		0.54563	381.795	354.589		0.54563
	0.65476	408.689	425.732		0.65476	501.085	576.335		0.65476	523.621	424.649		0.65476	473.152	409.126		0.65476	463.612	419.045		0.65476	535.489	459.192		0.65476	518.736	475.392		0.65476	623.551	503.477		0.65476	555.844	441.61		0.65476	444.12	475.037		0.65476	418.108	367.258		0.65476	390.935	348.473		0.65476
	0.76389	399.516	437.622		0.76389	495.272	587.644		0.76389	499.363	423.924		0.76389	472.7	405.888		0.76389	456.676	403.846		0.76389	535.77	452.98		0.76389	487.523	445.415		0.76389	632.689	534.051		0.76389	557.142	458.815		0.76389	431.217	471.3		0.76389	410.767	393.867		0.76389	380.347	354.355		0.76389
	0.87302	403.578	439.599		0.87302	472.328	581.733		0.87302	476.012	445.25		0.87302	478.443	416.265		0.87302	458.358	408.557		0.87302	509.168	444.337		0.87302	467.899	426.169		0.87302	580.471	588.326		0.87302	528.363	473.732		0.87302	423.164	465.247		0.87302	412.501	418.495		0.87302	382.146	365.023		0.87302
	0.98214	401.316	460.854		0.98214	507.264	573.839		0.98214	451.968	451.367		0.98214	465.769	409.491		0.98214	434.873	404.961		0.98214	474.587	445.893		0.98214	466.162	399.235		0.98214	532.988	609.211		0.98214	485.878	455.684		0.98214	440.025	467.353		0.98214	421.986	433.076		0.98214	372.091	382.494		0.98214
	1.09127	400.99	466.919		1.09127	537.494	570.742		1.09127	443.802	435.841		1.09127	439.64	415.965		1.09127	439.668	398.82		1.09127	448.91	430.384		1.09127	468.089	389.553		1.09127	493.095	581.485		1.09127	446.841	440.467		1.09127	437.506	476.93		1.09127	433.209	432.099		1.09127	373.971	388.095		1.09127
	1.2004	405.735	455.031		1.2004	545.034	565.858		1.2004	442.524	437.838		1.2004	434.034	450.992		1.2004	429.874	394.954		1.2004	424.276	417.133		1.2004	474.052	380.533		1.2004	483.677	555.805		1.2004	418.341	422.533		1.2004	440.308	496.04		1.2004	450.742	423.05		1.2004	366.622	410.718		1.2004
	1.30952	407.424	422.699		1.30952	525.579	541.399		1.30952	437.182	437.632		1.30952	415.093	471.031		1.30952	411.4	381.491		1.30952	413.883	419.632		1.30952	469.041	391.339		1.30952	458.847	519.856		1.30952	422.344	407.384		1.30952	445.109	517.18		1.30952	461.492	409.513		1.30952	382.441	442.128		1.30952
	1.41865	409.03	387.159		1.41865	484.882	517.437		1.41865	440.351	439.17		1.41865	404.494	463.626		1.41865	403.148	385.427		1.41865	412.615	417.324		1.41865	478.26	400.862		1.41865	453.286	482.989		1.41865	414.797	403.251		1.41865	433.98	543.828		1.41865	470.225	401.277		1.41865	376.017	471.838		1.41865
	1.52778	409.998	375.118		1.52778	436.332	475.222		1.52778	437.383	408.167		1.52778	405.21	455.978		1.52778	391.705	382.128		1.52778	415.686	415.268		1.52778	465.327	422.908		1.52778	446.625	473.797		1.52778	412.833	397.822		1.52778	410.569	564.565		1.52778	443.313	413.03		1.52778	367.744	495.896		1.52778
	1.6369	415.192	371.352		1.6369	404.848	418.207		1.6369	427.214	400.417		1.6369	397.951	460.439		1.6369	380.991	370.891		1.6369	428.807	414.126		1.6369	476.493	446.39		1.6369	451.493	452.939		1.6369	410.609	378.68		1.6369	410.639	571.965		1.6369	428.232	420.518		1.6369	367.899	502.708		1.6369
	1.74603	415.334	360.374		1.74603	384.599	400.604		1.74603	418.212	384.546		1.74603	394.096	449.782		1.74603	379.467	366.656		1.74603	449.071	418.684		1.74603	468.823	486.835		1.74603	450.199	438.309		1.74603	398.047	373.765		1.74603	396.516	573.562		1.74603	406.738	415.738		1.74603	354.728	490.067		1.74603
	1.85516	412.801	358.257		1.85516	374.705	381.661		1.85516	402.971	367.967		1.85516	383.46	439.033		1.85516	376.572	368.163		1.85516	479.158	438.691		1.85516	490.416	489.442		1.85516	427.003	424.188		1.85516	402.672	373.554		1.85516	376.544	539.651		1.85516	408.266	419.815		1.85516	350.578	478.422		1.85516
	1.96429	406.248	365.339		1.96429	376.424	375.462		1.96429	393.796	378.642		1.96429	382.935	430.862		1.96429	378.419	370.441		1.96429	500.366	446.979		1.96429	492.737	525.945		1.96429	416.581	408.542		1.96429	403.798	378.64		1.96429	368.905	502.015		1.96429	412.442	422.369		1.96429	338.784	448.049		1.96429
	2.07341	410.153	371.508		2.07341	396.172	369.734		2.07341	384.54	383.006		2.07341	384.144	407.851		2.07341	383.151	373.045		2.07341	495.936	452.976		2.07341	479.88	520.41		2.07341	415.382	407.167		2.07341	403.838	384.944		2.07341	368.827	483.337		2.07341	410.132	419.829		2.07341	345.053	426.154		2.07341
	2.18254	404.184	371.129		2.18254	401.549	376.552		2.18254	385.38	380.662		2.18254	380.423	383.776		2.18254	377.852	365.378		2.18254	481.824	450.67		2.18254	486.819	507.33		2.18254	427.003	401.339		2.18254	399.01	372.701		2.18254	347.577	445.58		2.18254	407.093	401.981		2.18254	346.393	406.076		2.18254
	2.29167	411.196	367.339		2.29167	407.876	372.784		2.29167	402.286	374.684		2.29167	385.841	375.425		2.29167	380.807	359.947		2.29167	475.176	442.191		2.29167	491.485	462.284		2.29167	431.02	400.103		2.29167	396.479	380.494		2.29167	353.896	417.805		2.29167	411.304	395.093		2.29167	353.999	391.476		2.29167
	2.40079	405.026	382.547		2.40079	421.236	373.85		2.40079	420.018	382.49		2.40079	397.686	358.331		2.40079	391.718	353.368		2.40079	465.852	413.513		2.40079	490.386	447.459		2.40079	431.295	385.285		2.40079	397.538	389.817		2.40079	357.359	402.617		2.40079	397.146	386.663		2.40079	355.888	375.038		2.40079
	2.50992	412.863	407.687		2.50992	438.816	382.359		2.50992	427.55	385.92		2.50992	410.426	353.578		2.50992	404.088	361.246		2.50992	465.623	386.249		2.50992	481.441	425.93		2.50992	454.392	389.301		2.50992	414.612	409.035		2.50992	353.727	381.856		2.50992	405.044	390.633		2.50992	357.503	360.261		2.50992
	2.61905	407.401	433.02		2.61905	434.384	405.293		2.61905	442.308	391.393		2.61905	426.095	366.1		2.61905	426.57	368.548		2.61905	463.24	379.945		2.61905	479.714	399.61		2.61905	475.985	386.208		2.61905	430.504	419.144		2.61905	359.259	373.7		2.61905	407.244	384.616		2.61905	370.401	356.132		2.61905
	2.72817	405.578	461.263		2.72817	429.801	410.544		2.72817	466.632	388.554		2.72817	453.757	373.266		2.72817	440.394	370.44		2.72817	464.325	385.793		2.72817	491.806	396.869		2.72817	481.716	390.314		2.72817	430.94	432.176		2.72817	364.094	376.103		2.72817	408.353	373.157		2.72817	375.5	353.05		2.72817
	2.8373	400.551	493.944		2.8373	409.59	421.239		2.8373	463.685	392.358		2.8373	460.209	386.593		2.8373	468.014	386.534		2.8373	463.349	384.413		2.8373	484.319	402.37		2.8373	495.816	375.666		2.8373	461.856	428.222		2.8373	383.746	372.207		2.8373	412.219	386.022		2.8373	386.686	345.387		2.8373
	2.94643	410.237	505.59		2.94643	398.232	439.591		2.94643	466.822	400.058		2.94643	449.013	400.437		2.94643	489.571	400.25		2.94643	459.13	372.905		2.94643	487.996	401.254		2.94643	515.013	377.984		2.94643	449.11	409.685		2.94643	391.705	374.594		2.94643	414.023	383.423		2.94643	391.256	342.343		2.94643
	3.05556	408.762	528.146		3.05556	393.438	442.691		3.05556	467.952	421.682		3.05556	449.822	404.9		3.05556	496.579	392.362		3.05556	489.827	381.752		3.05556	489.812	387.354		3.05556	526.187	370.391		3.05556	448.045	393.007		3.05556	403.814	379.909		3.05556	402.233	393.495		3.05556	371.002	339.699		3.05556
	3.16468	413.527	535.624		3.16468	384.926	443.12		3.16468	438.851	413.211		3.16468	438.621	406.874		3.16468	476.869	390.326		3.16468	505.505	386.284		3.16468	510.278	377.99		3.16468	524.107	373.941		3.16468	456.865	371.607		3.16468	398.098	384.256		3.16468	389.983	392.939		3.16468	390.47	335.512		3.16468
	3.27381	408.687	538.711		3.27381	394.418	454.868		3.27381	440.524	430.9		3.27381	430.784	401.542		3.27381	474.138	375.638		3.27381	509.91	381.862		3.27381	515.334	374.838		3.27381	515.601	369.226		3.27381	455.845	371.373		3.27381	415.852	379.144		3.27381	385.127	406.008		3.27381	401.295	352.099		3.27381
	3.38294	414.663	482.472		3.38294	397.616	461.487		3.38294	445.6	420.31		3.38294	421.67	390.557		3.38294	497.327	392.012		3.38294	535.368	380.939		3.38294	523.341	368.58		3.38294	510.365	367.135		3.38294	466.956	358.019		3.38294	443.921	401.151		3.38294	390.395	407.16		3.38294	411.447	351.335		3.38294
	3.49206	416.981	454.252		3.49206	425.248	465.505		3.49206	455.993	424.597		3.49206	435.403	386.844		3.49206	508.796	377.987		3.49206	558.842	378.779		3.49206	541.642	365.616		3.49206	510.754	375.026		3.49206	479.56	357.379		3.49206	471.435	403.378		3.49206	409.306	394.635		3.49206	415.269	359.646		3.49206
	3.60119	416.112	420.644		3.60119	445.595	445.869		3.60119	472.37	443.551		3.60119	454.918	395.06		3.60119	514.83	381.969		3.60119	578.336	370.377		3.60119	543.873	364.515		3.60119	520.969	375.672		3.60119	502.981	364.955		3.60119	453.948	399.55		3.60119	414.404	382.945		3.60119	419.818	372.584		3.60119
	3.71032	415.18	408.188		3.71032	456.811	441.751		3.71032	494.084	459.491		3.71032	463.301	387.373		3.71032	533.799	371.404		3.71032	594.666	380.638		3.71032	574.333	368.346		3.71032	544.531	376.449		3.71032	513.655	366.462		3.71032	464.708	414.525		3.71032	437.231	381.396		3.71032	420.188	392.617		3.71032
	3.81944	409.929	403.764		3.81944	467.339	435.591		3.81944	515.95	482.546		3.81944	480.917	383.12		3.81944	533.98	374.791		3.81944	591.825	395.257		3.81944	578.492	379.958		3.81944	577.704	386.062		3.81944	517.968	366.141		3.81944	480.671	422.301		3.81944	444.709	376.871		3.81944	430.356	421.547		3.81944
	3.92857	411.076	399.8		3.92857	485.085	442.452		3.92857	533.557	505.485		3.92857	501.378	374.783		3.92857	553.022	376.973		3.92857	595.636	405.442		3.92857	565.406	380.834		3.92857	589.87	390.656		3.92857	511.777	368.841		3.92857	472.448	413.654		3.92857	448.572	364.439		3.92857	453.253	441.575		3.92857
	4.0377	424.865	400.352		4.0377	522.251	451.543		4.0377	548.127	504.177		4.0377	510.192	377.475		4.0377	571.73	370.15		4.0377	593.302	418.96		4.0377	583.283	396.506		4.0377	602.569	401.561		4.0377	509.796	380.179		4.0377	459.033	397.332		4.0377	454.856	349.294		4.0377	445.429	423.03		4.0377
	4.14683	420.75	393.76		4.14683	577.225	474.689		4.14683	567.744	491.723		4.14683	537.499	378.124		4.14683	569.209	388.431		4.14683	607.227	422.692		4.14683	584.61	407.264		4.14683	598.864	409.498		4.14683	502.051	389.107		4.14683	469.837	396.025		4.14683	444.281	344.502		4.14683	475.993	414.215		4.14683
	4.25595	418.852	391.142		4.25595	630.913	483.926		4.25595	560.329	475.292		4.25595	542.928	384.523		4.25595	568.978	385.7		4.25595	603.519	427.199		4.25595	573.534	418.091		4.25595	591.848	411.668		4.25595	500.859	403.588		4.25595	461.193	385.228		4.25595	445.154	346.876		4.25595	462.189	376.671		4.25595
	4.36508	423.988	390.225		4.36508	683.357	490.363		4.36508	566.128	477.228		4.36508	540.701	376.854		4.36508	559.172	385.953		4.36508	600.958	435.195		4.36508	578.695	432.84		4.36508	585.166	408.653		4.36508	505.284	423.421		4.36508	461.002	384.595		4.36508	446.914	367.42		4.36508	468.598	353.16		4.36508
	4.47421	424.676	381.392		4.47421	702.469	486.616		4.47421	584.264	478.497		4.47421	553.362	381.891		4.47421	569.944	392.152		4.47421	594.517	451.004		4.47421	606.004	422.37		4.47421	573.941	407.458		4.47421	509.664	433.808		4.47421	463.325	383.218		4.47421	446.802	368.503		4.47421	457.797	360.458		4.47421
	4.58333	432.342	377.928		4.58333	671.843	468.773		4.58333	553.244	477.767		4.58333	563.073	392.859		4.58333	560.248	401.554		4.58333	599.576	460.604		4.58333	632.467	416.982		4.58333	581.015	420.67		4.58333	508.424	436.565		4.58333	472.5	384.214		4.58333	456.603	396.75		4.58333	465.854	346.079		4.58333
	4.69246	437.649	381.753		4.69246	640.131	445.191		4.69246	558.41	444.113		4.69246	559.558	398.853		4.69246	558.359	398.831		4.69246	614.831	460.845		4.69246	639.304	418.466		4.69246	593.697	423.678		4.69246	515.589	449.569		4.69246	481.246	395.571		4.69246	467.082	412.359		4.69246	460.381	351.72		4.69246
	4.80159	430.644	384.547		4.80159	606.507	438.81		4.80159	548.334	429.825		4.80159	555.865	395.399		4.80159	555.768	397.731		4.80159	628.437	460.692		4.80159	640.103	412.376		4.80159	581.666	421.392		4.80159	546.8	460.581		4.80159	481.043	393.649		4.80159	469.067	431.822		4.80159	461.696	360.766		4.80159
	4.91071	445.783	377.733		4.91071	592.221	428.901		4.91071	539.474	402.618		4.91071	572.634	426.778		4.91071	554.087	416.021		4.91071	628.862	449.95		4.91071	621.237	405.57		4.91071	583.935	421.919		4.91071	564.808	449.104		4.91071	465.957	401.006		4.91071	481.791	449.326		4.91071	448.918	367.159		4.91071
	5.01984	442.191	393.013		5.01984	576.581	433.316		5.01984	534.919	400.575		5.01984	546.822	442.644		5.01984	554.517	417.045		5.01984	605.935	440.897		5.01984	588.036	411.158		5.01984	563.327	441.515		5.01984	569.675	465.788		5.01984	468.721	408.647		5.01984	467.374	440.755		5.01984	451.646	386.333		5.01984
	5.12897	434.82	390.862		5.12897	557.368	440.46		5.12897	532.573	404.744		5.12897	547.049	438.344		5.12897	553.909	431.651		5.12897	585.61	442.778		5.12897	557.611	409.091		5.12897	569.526	435.758		5.12897	576.826	466.506		5.12897	477.086	414.242		5.12897	461.878	417.746		5.12897	436.087	389.297		5.12897
	5.2381	432.226	397.65		5.2381	518.3	428.508		5.2381	523.417	410.559		5.2381	531.984	428.557		5.2381	550.29	439.844		5.2381	572.372	443.167		5.2381	524.744	406.161		5.2381	548.065	440.441		5.2381	568.996	456.819		5.2381	478.376	445.118		5.2381	447.789	397.347		5.2381	430.846	377.44		5.2381
	5.34722	434.933	389.889		5.34722	492.145	434.069		5.34722	512.317	409.362		5.34722	512.727	442.739		5.34722	536.394	432.66		5.34722	550.628	430.74		5.34722	502.009	395.998		5.34722	550.902	437.695		5.34722	578.686	459.738		5.34722	512.089	458.303		5.34722	432.735	380.356		5.34722	432.324	381.53		5.34722
	5.45635	443.42	390.331		5.45635	474.82	435.521		5.45635	489.719	397.25		5.45635	495.984	425.013		5.45635	517.151	429.651		5.45635	535.003	418.701		5.45635	492.018	403.772		5.45635	526.481	445.154		5.45635	550.032	443.154		5.45635	534.119	497.971		5.45635	439.654	378.629		5.45635	437.814	372.331		5.45635
	5.56548	446.03	390.729		5.56548	465.792	431.766		5.56548	465.189	390.204		5.56548	479.845	415.037		5.56548	507.225	426.692		5.56548	512.377	412.431		5.56548	490.779	397.513		5.56548	509.557	449.078		5.56548	541.11	446.567		5.56548	560.414	505.504		5.56548	444.157	401.967		5.56548	428.344	365.17		5.56548
	5.6746	437.59	392.439		5.6746	457.833	453.196		5.6746	454.184	393.092		5.6746	467.756	414.225		5.6746	486.993	430.712		5.6746	511.335	408.606		5.6746	496.953	400.051		5.6746	507.756	436.997		5.6746	527.006	449.167		5.6746	596.697	516.046		5.6746	445.486	402.867		5.6746	417.195	381.3		5.6746
	5.78373	437.411	388.949		5.78373	428.73	457.95		5.78373	459.615	397.057		5.78373	457.157	405.222		5.78373	474.86	425.413		5.78373	499.018	409.78		5.78373	500.408	395.895		5.78373	514.351	428.793		5.78373	518.552	439.225		5.78373	583.165	505.913		5.78373	469.354	414.218		5.78373	425.363	410.234		5.78373
	5.89286	440.732	389.591		5.89286	423.14	457.034		5.89286	463.998	404.423		5.89286	448.507	399.68		5.89286	466.166	417.343		5.89286	486.799	416.432		5.89286	511.49	396.631		5.89286	526.4	436.585		5.89286	523.189	445.069		5.89286	541.235	480.314		5.89286	456.773	413.143		5.89286	438.388	416.004		5.89286
	6.00198	437.791	394.616		6.00198	423.961	442.512		6.00198	464.906	397.784		6.00198	441.593	401.86		6.00198	461.004	426.125		6.00198	491.49	420.061		6.00198	530.499	412.331		6.00198	529.529	429.452		6.00198	535.646	452.511		6.00198	514.859	481.8		6.00198	461.613	413.905		6.00198	433.018	412.729		6.00198
	6.11111	439.502	390.981		6.11111	426.404	422.005		6.11111	468.652	409.034		6.11111	441.541	393.932		6.11111	475.518	414.541		6.11111	501.862	436.29		6.11111	537.788	417.6		6.11111	517.729	443.339		6.11111	544.161	436.139		6.11111	487.477	464.797		6.11111	453.061	396.12		6.11111	456.937	423.696		6.11111
	6.22024	437.925	399.216		6.22024	421.913	412.926		6.22024	465.668	413.845		6.22024	449.47	394.442		6.22024	473.208	422.888		6.22024	485.213	425.07		6.22024	528.242	392.106		6.22024	521.448	455.969		6.22024	543.368	426.094		6.22024	475.188	443.203		6.22024	447.313	391.081		6.22024	458.77	415.592		6.22024
	6.32937	441.543	396.265		6.32937	419.577	401.316		6.32937	456.315	411.98		6.32937	452.927	392.817		6.32937	470.491	423.609		6.32937	489.211	428.221		6.32937	495.694	394.469		6.32937	543.912	452.85		6.32937	526.869	415.542		6.32937	466.041	433.006		6.32937	438.656	385.299		6.32937	446.044	406.558		6.32937
	6.43849	444.445	386.246		6.43849	411.366	396.445		6.43849	449.497	413.213		6.43849	451.617	382.792		6.43849	449.744	412.352		6.43849	486.415	425.521		6.43849	489.655	383.311		6.43849	562.394	466.118		6.43849	506.883	410.953		6.43849	464.229	416.004		6.43849	440.018	375.283		6.43849	455.316	412.566		6.43849
	6.54762	430.388	390.527		6.54762	416.593	384.819		6.54762	452.295	417.59		6.54762	455.466	389.494		6.54762	466.842	415.508		6.54762	501.169	436.346		6.54762	497.081	388.758		6.54762	552.524	481.275		6.54762	487.97	417.057		6.54762	456.816	414.376		6.54762	436.442	370.03		6.54762	441.922	391.956		6.54762
	6.65675	435.382	399.537		6.65675	413.004	384.73		6.65675	454.376	432.948		6.65675	457.327	388.512		6.65675	461.426	414.897		6.65675	497.604	443.127		6.65675	485.724	388.351		6.65675	575.255	457.433		6.65675	479.827	404.676		6.65675	456.529	426.625		6.65675	450.373	384.221		6.65675	462.2	364.766		6.65675
	6.76587	453.442	407.122		6.76587	420.241	394.696		6.76587	468.889	435.737		6.76587	465.913	379.545		6.76587	474.749	413.297		6.76587	508.489	465.594		6.76587	500.357	386.162		6.76587	609.364	446.389		6.76587	487.536	402.213		6.76587	460.482	421.749		6.76587	449.983	386.853		6.76587	449.155	369.27		6.76587
	6.875	462.233	426.017		6.875	425.649	402.201		6.875	480.379	421.118		6.875	463.415	383.121		6.875	478.4	407.95		6.875	528.424	463.72		6.875	497.069	399.116		6.875	597.455	446.463		6.875	474.965	395.434		6.875	467.73	419.46		6.875	447.721	388.492		6.875	443.418	365.778		6.875
	6.98413	452.768	438.758		6.98413	415.082	401.739		6.98413	481.152	403.412		6.98413	456.239	393.285		6.98413	482.399	403.898		6.98413	534.174	461.106		6.98413	502.866	394.672		6.98413	556.459	424.167		6.98413	485.402	398.726		6.98413	458.069	412.321		6.98413	439.434	407.931		6.98413	444.887	376.575		6.98413
	7.09325	452.094	451.346		7.09325	428	399.346		7.09325	494.063	408.396		7.09325	449.562	393.986		7.09325	485.908	412.203		7.09325	549.246	460.711		7.09325	515.044	407.57		7.09325	536.467	426.583		7.09325	491.088	407.819		7.09325	472.273	420.088		7.09325	437.697	405.735		7.09325	435.356	384.452		7.09325
	7.20238	452.516	478.983		7.20238	412.939	402.635		7.20238	498.821	391.18		7.20238	454.167	381.314		7.20238	485.079	406.628		7.20238	546.878	470.366		7.20238	511.435	425.91		7.20238	535.356	423.814		7.20238	486.466	407.828		7.20238	464.842	410.59		7.20238	442.031	396.634		7.20238	423.519	384.213		7.20238
	7.31151	460.179	474.207		7.31151	421.284	401.741		7.31151	495.39	396.825		7.31151	469.84	381.073		7.31151	489.741	414.666		7.31151	531.124	476.916		7.31151	519.94	419.163		7.31151	542.282	423.89		7.31151	498.353	405.541		7.31151	473.258	422.358		7.31151	442.193	391.267		7.31151	430.15	383.187		7.31151
	7.42063	433.687	484.001		7.42063	427.182	394.382		7.42063	478.812	399.832		7.42063	465.78	383.535		7.42063	483.949	407.007		7.42063	541.034	507.134		7.42063	547.225	429.074		7.42063	545.753	439.551		7.42063	509.287	416.512		7.42063	490.283	419.787		7.42063	439.99	397.997		7.42063	437.766	386.317		7.42063
	7.52976	453.834	486.627		7.52976	432.168	397.851		7.52976	470.808	405.096		7.52976	480.565	376.911		7.52976	501.933	423.126		7.52976	558.709	532.41		7.52976	558.753	460.193		7.52976	551.072	458.229		7.52976	517.019	428.535		7.52976	507.029	403.022		7.52976	456.618	407.855		7.52976	440.573	386.405		7.52976
	7.63889	473.762	491.083		7.63889	435.133	401.346		7.63889	462.299	387.263		7.63889	476.494	375.968		7.63889	515.508	407.65		7.63889	569.965	557.641		7.63889	561.025	476.3		7.63889	565.311	463.417		7.63889	535.643	438.94		7.63889	526.174	409.25		7.63889	463.324	391.598		7.63889	445.877	374.908		7.63889
	7.74802	454.741	497.114		7.74802	433.469	392.947		7.74802	471.953	400.418		7.74802	498.957	377.761		7.74802	514.964	401.141		7.74802	584.519	610.449		7.74802	586.926	498.103		7.74802	580.177	450.285		7.74802	556.077	449.299		7.74802	530.563	411.227		7.74802	456.888	410.72		7.74802	453.502	371.233		7.74802
	7.85714	448.334	510.657		7.85714	440.383	402.266		7.85714	484.158	395.578		7.85714	507.971	380.677		7.85714	515.713	393.801		7.85714	569.069	639.578		7.85714	626.795	500.293		7.85714	563.29	431.986		7.85714	571.113	457.113		7.85714	525.627	423.286		7.85714	488.41	410.544		7.85714	452.471	370.298		7.85714
	7.96627	443.344	530.411		7.96627	446.929	411.914		7.96627	491.602	399.905		7.96627	498.761	385.124		7.96627	504.734	397.137		7.96627	576.119	639.475		7.96627	639.099	487.307		7.96627	571.782	432.236		7.96627	602.701	467.161		7.96627	535.866	415.291		7.96627	481.758	409.109		7.96627	458.232	383.715		7.96627
	8.0754	436.888	506.324		8.0754	458.236	411.215		8.0754	482.827	391.903		8.0754	502.387	393.643		8.0754	510.091	405.398		8.0754	581.591	600.005		8.0754	640.739	497.227		8.0754	557.44	438.142		8.0754	634.115	476.599		8.0754	526.26	415.275		8.0754	480.68	409.403		8.0754	450.084	370.277		8.0754
	8.18452	431.973	455.089		8.18452	471.329	423.846		8.18452	482.211	390.152		8.18452	497.958	390.053		8.18452	517.846	419.22		8.18452	588.346	538.785		8.18452	612.473	506.994		8.18452	564.997	445.838		8.18452	631.226	484.559		8.18452	528.326	409.052		8.18452	496.512	395.073		8.18452	447.963	374.469		8.18452
	8.29365	437.205	418.123		8.29365	493.889	451.328		8.29365	480.748	406.129		8.29365	491.001	395.407		8.29365	541.701	425.806		8.29365	565.2	513.609		8.29365	585.631	501.066		8.29365	552.898	442.411		8.29365	636.623	492.102		8.29365	509.7	410.175		8.29365	502.336	401.566		8.29365	445.508	368.887		8.29365
			377.363										8.40278	487.674	402.282		8.40278	573.646	431.993		8.40278	551.572	514.767		8.40278	553.773	494.491		8.40278	523.39	441.732		8.40278	642.765	490.287		8.40278	487.149	416.64		8.40278	502.671	392.451		8.40278	441.282	359.292		8.40278
																	8.5119	591.766	425.019		8.5119	574.657	525.755		8.5119	516.339	498.084		8.5119	506.894	443.343		8.5119	601.05	476.655		8.5119	490.326	428.513		8.5119	478.792	389.037		8.5119	433.614	357.509		8.5119
																	8.62103	604.647	421.083		8.62103	580.356	542.038		8.62103	498.275	506.582		8.62103	500.862	451.108		8.62103	555.801	459.89		8.62103	476.692	428.041		8.62103	481.059	385.469		8.62103	415.548	358.903		8.62103
																																	8.73016	535.461	443.697		8.73016	467.03	430.458		8.73016	459.982	381.598		8.73016	407.468	359.942		8.73016
																																	8.83929	514.583	440.343		8.83929	467.447	439.274		8.83929	447.579	378.922		8.83929	407.71	367.176		8.83929
																																									8.94841	439.299	387.23						8.94841
																																									9.05754	423.017	381.666
[truncated: 11 more columns]

## Sheet: exp2 endosome 3
	t14				t15				t16				t17				t18				t19				t20				t21				t22				t23				t24				t25				t26
	0	435.411	429.796		0	441.998	440.274		0	477.965	419.6		0	442.409	415.77		0	459.315	467.367		0	490.391	520.413		0	500.698	442.89		0	530.276	445.287		0	549.698	408.773		0	520.361	411.325		0	496.293	417.298		0	452.036	405.461		0
	0.10913	409.451	412.272		0.10913	445.595	465.971		0.10913	482.98	439.366		0.10913	443.47	426.844		0.10913	467.917	489.341		0.10913	477.341	522.762		0.10913	527.928	466.039		0.10913	533.997	456.732		0.10913	536.855	412.907		0.10913	552.997	409.916		0.10913	514.128	427.53		0.10913	458.62	403.325		0.10913
	0.21825	413.788	418.364		0.21825	465.621	485.163		0.21825	458.385	438.209		0.21825	468.763	446.828		0.21825	465.822	514.624		0.21825	490.524	512.928		0.21825	519.381	493.223		0.21825	541.697	474.864		0.21825	558.636	423.161		0.21825	575.958	414.934		0.21825	518.704	504.884		0.21825	455.911	425.572		0.21825
	0.32738	430.734	427.902		0.32738	476.382	512.285		0.32738	474.17	446.111		0.32738	495.618	495.815		0.32738	467.027	543.134		0.32738	498.122	489.829		0.32738	542.842	527.859		0.32738	545.779	480.028		0.32738	598.185	458.807		0.32738	607.055	438.858		0.32738	528.537	563.619		0.32738	467.551	425.12		0.32738
	0.43651	433.417	436.309		0.43651	503.031	543.367		0.43651	468.155	454.72		0.43651	502.189	515.658		0.43651	503.948	566.755		0.43651	529.065	507.709		0.43651	573.047	576.909		0.43651	542.747	514.853		0.43651	603.603	480.925		0.43651	643.553	461.505		0.43651	557.153	617.132		0.43651	465.826	414.1		0.43651
	0.54563	439.691	465.565		0.54563	523.638	554.184		0.54563	472.421	466.217		0.54563	521.069	519.873		0.54563	529.597	562.985		0.54563	557.741	514.266		0.54563	608.516	617.861		0.54563	561.51	520.409		0.54563	648.24	498.277		0.54563	646.621	473.434		0.54563	602.773	680.468		0.54563	474.119	423.133		0.54563
	0.65476	458.589	463.651		0.65476	541.153	548.442		0.65476	487.345	459.457		0.65476	529.462	513.068		0.65476	586.016	556.762		0.65476	566.319	520.753		0.65476	641.028	651.305		0.65476	597.169	531.779		0.65476	660.393	482.889		0.65476	663.864	504.245		0.65476	637.328	719.552		0.65476	484.486	432.073		0.65476
	0.76389	458.928	458.228		0.76389	541.863	535.289		0.76389	487.253	454.064		0.76389	519.923	496.57		0.76389	585.177	496.482		0.76389	570.558	492.067		0.76389	664.209	629.729		0.76389	637.018	535.376		0.76389	666.553	449.093		0.76389	655.874	534.569		0.76389	653.099	716.344		0.76389	511.422	426.106		0.76389
	0.87302	459.972	445.311		0.87302	521.467	511.198		0.87302	487.464	438.871		0.87302	497.954	472.415		0.87302	568.76	450.112		0.87302	554.702	454.535		0.87302	696.889	569.154		0.87302	625.011	523		0.87302	639.904	445.568		0.87302	644.356	506.652		0.87302	646.972	675.391		0.87302	519.021	435.953		0.87302
	0.98214	457.892	439.906		0.98214	504.738	496.274		0.98214	485.795	419.344		0.98214	473.289	452.736		0.98214	545.235	428.91		0.98214	536.18	427.176		0.98214	679.187	506.252		0.98214	615.797	505.469		0.98214	636.238	426.076		0.98214	629.708	460.356		0.98214	632.641	608.754		0.98214	525.88	424.975		0.98214
	1.09127	477.689	450.855		1.09127	484.096	489.708		1.09127	480.564	424.06		1.09127	467.161	441.805		1.09127	536.604	415.358		1.09127	528.304	421.326		1.09127	648.291	452.763		1.09127	593.202	478.542		1.09127	643.077	418.29		1.09127	623.294	430.102		1.09127	623.751	546.899		1.09127	527.382	423.261		1.09127
	1.2004	483.439	473.763		1.2004	485.068	522.363		1.2004	459.84	434.522		1.2004	464.111	430.451		1.2004	534.667	413.461		1.2004	498.853	420.238		1.2004	626.23	416.037		1.2004	595.388	449.873		1.2004	620.184	413.69		1.2004	628.011	391.827		1.2004	626.444	472.652		1.2004	527.886	408.186		1.2004
	1.30952	465.414	485.592		1.30952	467.361	571.025		1.30952	464.75	446.042		1.30952	437.408	419.74		1.30952	522.033	419.439		1.30952	487.663	409.117		1.30952	623.268	398.467		1.30952	576.513	441.742		1.30952	622.734	398.466		1.30952	617.606	382.235		1.30952	632.197	436.172		1.30952	514.708	403.035		1.30952
	1.41865	447.923	472.062		1.41865	450.872	617.316		1.41865	444.998	448.437		1.41865	440.146	415.717		1.41865	492.795	435.78		1.41865	477.337	415.71		1.41865	619.696	397.533		1.41865	585.238	417.689		1.41865	629.136	396.816		1.41865	609.813	386.688		1.41865	607.579	417.75		1.41865	511.333	387.288		1.41865
	1.52778	432.932	442.848		1.52778	444.415	597.68		1.52778	451.011	467.676		1.52778	444.761	417.848		1.52778	476.838	442.008		1.52778	460.552	411.137		1.52778	603.1	386.095		1.52778	588.614	417.721		1.52778	614.722	396.911		1.52778	600.521	386.799		1.52778	615.002	417.329		1.52778	505.821	381.074		1.52778
	1.6369	427.585	418.12		1.6369	439.208	544.373		1.6369	453.57	444.081		1.6369	441.162	407.298		1.6369	471.578	444.717		1.6369	462.28	416.968		1.6369	590.38	389.355		1.6369	578.942	405.038		1.6369	596.666	399.516		1.6369	583.873	401.295		1.6369	614.803	411.58		1.6369	507.19	379.754		1.6369
	1.74603	412.609	421.416		1.74603	429.771	488.243		1.74603	443.738	434.519		1.74603	436.12	402.699		1.74603	466.832	449.042		1.74603	457.773	423.998		1.74603	575.246	411.271		1.74603	573.35	415.41		1.74603	584.953	409.24		1.74603	557.299	393		1.74603	595.857	414.006		1.74603	504.235	381.042		1.74603
	1.85516	401.881	416.513		1.85516	432.533	475.822		1.85516	454.7	426.489		1.85516	432.113	394.708		1.85516	463.731	470.381		1.85516	451.577	420.591		1.85516	554.269	418.872		1.85516	559.544	415.402		1.85516	574.321	412.607		1.85516	542.278	398.51		1.85516	578.239	431.281		1.85516	486.55	388.416		1.85516
	1.96429	402.225	412.01		1.96429	439.941	469.93		1.96429	461.991	431.965		1.96429	441.083	398.441		1.96429	455.139	467.584		1.96429	464.485	418.24		1.96429	529.498	425.972		1.96429	543.697	417.51		1.96429	580.061	411.096		1.96429	534.89	393.246		1.96429	557.945	437.854		1.96429	472.991	400.172		1.96429
	2.07341	417.865	425.209		2.07341	447.341	459.266		2.07341	475.492	427.449		2.07341	441.599	407.415		2.07341	449.575	438.579		2.07341	471.799	412.158		2.07341	529.262	433.482		2.07341	517.008	414.425		2.07341	591.985	414.269		2.07341	540.597	385.65		2.07341	547.328	437.481		2.07341	472.11	407.296		2.07341
	2.18254	430.598	417.684		2.18254	447.063	447.466		2.18254	491.916	432.217		2.18254	445.923	411.229		2.18254	444.496	403.733		2.18254	470.444	410.314		2.18254	511.537	420.539		2.18254	519.73	414.147		2.18254	577.063	396.99		2.18254	539.977	387.848		2.18254	545.547	422.265		2.18254	482.855	407.099		2.18254
	2.29167	442.363	421.021		2.29167	447.997	432.599		2.29167	508.934	420.983		2.29167	460.098	407.194		2.29167	454.395	387.885		2.29167	474.213	412.638		2.29167	508.78	414.531		2.29167	515.597	409.655		2.29167	563.254	392.574		2.29167	546.611	392.027		2.29167	527.374	413.627		2.29167	492.088	406.563		2.29167
	2.40079	440.606	430.552		2.40079	460.135	427.841		2.40079	522.905	421.682		2.40079	462.863	418.605		2.40079	470.828	391.425		2.40079	477.655	406.694		2.40079	506.762	403.203		2.40079	524.946	385.867		2.40079	548.388	393.655		2.40079	554.56	388.34		2.40079	524.685	419.844		2.40079	498.91	418.699		2.40079
	2.50992	466.161	422.471		2.50992	468.36	427.068		2.50992	505.076	417.705		2.50992	453.753	426.882		2.50992	471.812	390.498		2.50992	461.829	414.304		2.50992	505.42	388.601		2.50992	502.266	377.67		2.50992	532.952	397.13		2.50992	581.174	383.013		2.50992	514.031	429.782		2.50992	471.312	405.486		2.50992
	2.61905	465.054	407.443		2.61905	470.511	417.659		2.61905	495.776	427.192		2.61905	464.956	442.941		2.61905	474.138	393.431		2.61905	461.402	416.316		2.61905	514.613	402.146		2.61905	495.658	394.532		2.61905	520.007	370.773		2.61905	568.757	395.424		2.61905	507.277	417.5		2.61905	453.423	416.226		2.61905
	2.72817	469.781	397.687		2.72817	465.874	421.183		2.72817	484.081	438.702		2.72817	452.971	467.171		2.72817	485.711	395.97		2.72817	474.596	424.896		2.72817	534.31	393.44		2.72817	510.024	395.98		2.72817	504.763	391.031		2.72817	569.183	398.885		2.72817	506.872	421.862		2.72817	447.138	411.108		2.72817
	2.8373	467.001	402.463		2.8373	466.355	416.445		2.8373	464.492	442.169		2.8373	459.574	499.036		2.8373	484.703	401.103		2.8373	449.128	412.912		2.8373	532.121	392.264		2.8373	516.828	395.04		2.8373	503.281	401.952		2.8373	549.565	399.018		2.8373	497.938	425.468		2.8373	440.007	411.89		2.8373
	2.94643	469.31	413.338		2.94643	466.502	415.68		2.94643	454.096	444.13		2.94643	446.215	487.287		2.94643	482.149	406.824		2.94643	449.772	409.483		2.94643	558.91	405.435		2.94643	545.79	399.581		2.94643	509.889	406.151		2.94643	544.793	405.737		2.94643	494.357	426.949		2.94643	438.72	409.659		2.94643
	3.05556	449.462	400.405		3.05556	451.269	409.466		3.05556	450.131	443.475		3.05556	437.01	469.133		3.05556	465.7	406.95		3.05556	451.719	416.625		3.05556	553.537	426.964		3.05556	558.782	386.491		3.05556	510.984	403.105		3.05556	530.016	389.142		3.05556	490.728	426.26		3.05556	439.184	411.674		3.05556
	3.16468	443.902	391.996		3.16468	435.36	413.563		3.16468	440.729	435.195		3.16468	424.756	444.74		3.16468	445.677	402.405		3.16468	464.494	393.76		3.16468	530.507	417.017		3.16468	567.405	393.161		3.16468	501.974	398.298		3.16468	525.838	393.309		3.16468	475.24	411.592		3.16468	432.168	397.528		3.16468
	3.27381	422.288	393.709		3.27381	443.024	409.5		3.27381	440.138	410.087		3.27381	421.083	405.951		3.27381	445.572	393.769		3.27381	451.974	389.209		3.27381	522.436	417.322		3.27381	558.424	401.544		3.27381	508.733	406.079		3.27381	520.039	390.315		3.27381	473.543	404.504		3.27381	429.237	390.999		3.27381
	3.38294	419.389	387.843		3.38294	437.923	401.848		3.38294	443.211	392.397		3.38294	425.85	398.44		3.38294	446.939	389.951		3.38294	457.899	390.447		3.38294	511.563	404.249		3.38294	544.347	405.105		3.38294	519.415	403.933		3.38294	518.204	389.86		3.38294	473.163	400.242		3.38294	418.175	392.25		3.38294
	3.49206	427.697	375.227		3.49206	431.618	393.525		3.49206	435.973	391.831		3.49206	409.51	391.38		3.49206	440.061	398.901		3.49206	464.757	398.643		3.49206	507.544	407.781		3.49206	544.518	411.841		3.49206	511.255	420.691		3.49206	511.406	396.647		3.49206	459.55	401.773		3.49206	415.128	384.513		3.49206
	3.60119	425.596	388.925		3.60119	433.297	393.241		3.60119	430.554	405.338		3.60119	423.332	393.433		3.60119	433.133	408.806		3.60119	468.052	400.993		3.60119	502.652	401.855		3.60119	527.963	402.423		3.60119	516.114	405.705		3.60119	503.277	397.512		3.60119	476.116	410.575		3.60119	409.613	390.945		3.60119
	3.71032	419.163	390.502		3.71032	421.783	395.635		3.71032	427.752	408.315		3.71032	428.185	387.835		3.71032	424.18	399.638		3.71032	460.099	394.612		3.71032	498.906	404.154		3.71032	527.204	394.678		3.71032	513.968	408.981		3.71032	509.313	402.223		3.71032	473.724	412.282		3.71032	411.398	389.521		3.71032
	3.81944	424.768	402.229		3.81944	424.017	380.471		3.81944	423.977	404.783		3.81944	430.007	400.446		3.81944	446.622	389.927		3.81944	453.162	396.236		3.81944	491.509	393.399		3.81944	524.951	404.958		3.81944	506.89	391.208		3.81944	519.671	408.082		3.81944	481.776	408.699		3.81944	404.3	396.431		3.81944
	3.92857	427.894	402.162		3.92857	442.713	384.126		3.92857	428.748	403.78		3.92857	438.727	397.361		3.92857	454.898	388.211		3.92857	469.43	395.48		3.92857	497.874	388.309		3.92857	513.578	384.643		3.92857	515.59	391.711		3.92857	534.376	428.189		3.92857	481.826	409.401		3.92857	413.991	412.723		3.92857
	4.0377	429.791	409.923		4.0377	456.974	392.249		4.0377	435.552	405.68		4.0377	465.06	407.652		4.0377	451.161	379.554		4.0377	464.986	395.356		4.0377	495.711	382.14		4.0377	516.504	382.778		4.0377	514.46	397.764		4.0377	544.634	431.456		4.0377	492.777	416.039		4.0377	413.188	424.794		4.0377
	4.14683	435.606	410.357		4.14683	464.944	404.585		4.14683	452.155	400.981		4.14683	488.402	426.357		4.14683	462.499	394.565		4.14683	478.205	402.18		4.14683	490.162	388.997		4.14683	513.59	395.99		4.14683	533.253	389.757		4.14683	549.89	426.003		4.14683	498.919	401.405		4.14683	409.392	403.188		4.14683
	4.25595	425.19	404.536		4.25595	452.419	415.848		4.25595	461.663	411.675		4.25595	507.072	422.553		4.25595	471.739	398.89		4.25595	467.822	408.733		4.25595	498.095	395.98		4.25595	518.779	403.247		4.25595	546.46	392.399		4.25595	548.785	417.589		4.25595	504.853	399.789		4.25595	423.818	402.205		4.25595
	4.36508	412.55	401.044		4.36508	439.392	415.216		4.36508	468.594	404.492		4.36508	502.924	416.372		4.36508	503.677	400.622		4.36508	482.066	431.455		4.36508	507.092	400.488		4.36508	532.931	410.312		4.36508	535.602	405.852		4.36508	537.935	412.945		4.36508	497.254	407.336		4.36508	443.538	397.388		4.36508
	4.47421	435.594	426.908		4.47421	430.48	406.97		4.47421	456.166	398.521		4.47421	475.152	410.596		4.47421	483.407	403.457		4.47421	484.342	421.688		4.47421	517.723	415.214		4.47421	533.958	415.136		4.47421	545.591	404.433		4.47421	529.697	410.455		4.47421	492.796	407.093		4.47421	456.888	387.867		4.47421
	4.58333	439.986	420.839		4.58333	418.895	400.045		4.58333	445.68	394.535		4.58333	467.802	423.839		4.58333	482.904	400.633		4.58333	488.946	425.141		4.58333	543.209	425.121		4.58333	551.246	419.729		4.58333	552.551	405.544		4.58333	529.667	400.967		4.58333	488.129	408.11		4.58333	448.243	391.914		4.58333
	4.69246	456.141	419.127		4.69246	416.33	394.523		4.69246	422.077	387.927		4.69246	455.587	421.115		4.69246	466.869	395.793		4.69246	495.786	439.601		4.69246	555.124	432.095		4.69246	536.682	416.992		4.69246	551.293	405.038		4.69246	525.537	431.967		4.69246	490.51	418.3		4.69246	433.336	398.097		4.69246
	4.80159	416.319	416.388		4.80159	415.632	391.651		4.80159	428.887	402.72		4.80159	448.531	407.629		4.80159	466.493	400.501		4.80159	501.219	453.177		4.80159	550.485	429.637		4.80159	566.828	422.637		4.80159	542.469	403.045		4.80159	528.435	439.096		4.80159	519.518	437.336		4.80159	419.218	390.099		4.80159
	4.91071	416.015	409.17		4.91071	415.082	389.81		4.91071	425.048	393.222		4.91071	437.918	416.809		4.91071	472.197	403.528		4.91071	510.171	456.922		4.91071	555.273	439.638		4.91071	561.175	439.316		4.91071	546.728	416.866		4.91071	538.067	439.577		4.91071	508.538	425.584		4.91071	424.992	383.623		4.91071
	5.01984	415.224	429.5		5.01984	412.646	396.263		5.01984	416.318	393.52		5.01984	447.483	437.271		5.01984	464.022	411.395		5.01984	499.742	452.462		5.01984	550.653	421.626		5.01984	558.561	428.235		5.01984	576.49	428.473		5.01984	585.891	440.713		5.01984	529.65	447.526		5.01984	439.02	391.122		5.01984
	5.12897	412.089	432.601		5.12897	417.779	400.893		5.12897	430.082	390.921		5.12897	455.932	473.501		5.12897	463.212	422.282		5.12897	484.9	442.134		5.12897	532.823	420.576		5.12897	543.041	426.973		5.12897	551.76	422.328		5.12897	604.757	426.135		5.12897	527.842	455.234		5.12897	439.048	397.297		5.12897
	5.2381	412.126	426.451		5.2381	439.459	412.289		5.2381	428.13	415.941		5.2381	466.198	498.687		5.2381	453.963	420.562		5.2381	462.503	425.705		5.2381	537.268	438.441		5.2381	542.891	420.62		5.2381	557.133	438.682		5.2381	662.328	455.612		5.2381	536.181	453.133		5.2381	430.679	396.275		5.2381
	5.34722	435.971	439.068		5.34722	447.907	442.493		5.34722	425.959	418.812		5.34722	494.446	545.028		5.34722	466.532	442.068		5.34722	462.016	440.536		5.34722	527.083	435.93		5.34722	539.102	446.354		5.34722	566.571	457.457		5.34722	692.585	465.878		5.34722	554.295	451.361		5.34722	427.399	398.831		5.34722
	5.45635	433.791	446.931		5.45635	452.329	486.796		5.45635	435.826	443.988		5.45635	513.257	566.295		5.45635	492.794	467.683		5.45635	454.6	450.065		5.45635	530.844	442.999		5.45635	542.734	453.152		5.45635	591.712	450.627		5.45635	706.501	463.165		5.45635	593.403	459.778		5.45635	424.535	385.993		5.45635
	5.56548	448.157	435.386		5.56548	452.466	527.069		5.56548	439.659	459.654		5.56548	531.395	561.494		5.56548	482.351	477.491		5.56548	466.8	476.04		5.56548	546.903	491.286		5.56548	524.407	464.262		5.56548	597.368	461.71		5.56548	693.196	455.77		5.56548	629.765	475.692		5.56548	435.732	400.257		5.56548
	5.6746	450.648	457.347		5.6746	436.458	530.118		5.6746	431.984	456.084		5.6746	530.476	540.949		5.6746	483.239	497.305		5.6746	468.097	469.029		5.6746	555.119	528.517		5.6746	551.462	472.269		5.6746	606.322	476.211		5.6746	648.079	449.234		5.6746	648.396	467.299		5.6746	437.103	398.003		5.6746
	5.78373	450.688	471.589		5.78373	437.786	512.252		5.78373	459.875	458.737		5.78373	531.143	505.672		5.78373	496.02	501.892		5.78373	463.722	474.86		5.78373	583.351	523.123		5.78373	552.686	479.613		5.78373	601.136	472.735		5.78373	612.558	455.07		5.78373	629.364	453.25		5.78373	444.123	396.948		5.78373
	5.89286	437.875	486.073		5.89286	443.533	515.197		5.89286	455.326	449.311		5.89286	512.021	471.457		5.89286	503.502	494.996		5.89286	477.754	491.168		5.89286	582.953	553.596		5.89286	560.397	479.692		5.89286	603.639	463.214		5.89286	570.158	471.183		5.89286	606.301	443.946		5.89286	470.961	395.154		5.89286
	6.00198	431.516	497.832		6.00198	452.549	499.053		6.00198	446.425	441.632		6.00198	511.658	452.652		6.00198	485.203	461.13		6.00198	479.939	481.759		6.00198	574.31	526.596		6.00198	602.575	492.715		6.00198	595.93	455.881		6.00198	553.726	458.259		6.00198	583.266	450.205		6.00198	483.756	409.214		6.00198
	6.11111	436.187	495.214		6.11111	455.69	464.162		6.11111	439.458	436.031		6.11111	514.201	439.236		6.11111	476.807	432.949		6.11111	495.087	475.717		6.11111	563.168	494.691		6.11111	607.609	484.086		6.11111	581.242	459.729		6.11111	553.186	461.147		6.11111	570.653	450.915		6.11111	484.751	417.481		6.11111
	6.22024	427.368	487.726		6.22024	437.434	439.21		6.22024	436.736	428.2		6.22024	491.839	437.864		6.22024	476.148	413.281		6.22024	492.269	468.87		6.22024	552.39	476.274		6.22024	577.899	459.203		6.22024	574.161	475.823		6.22024	544.201	455.106		6.22024	558.573	450.558		6.22024	499.673	413.665		6.22024
	6.32937	420.158	464.299		6.32937	426.13	420.232		6.32937	441.307	421.228		6.32937	477.401	431.537		6.32937	448.141	415.696		6.32937	489.407	449.646		6.32937	549.603	445.88		6.32937	554.784	445.893		6.32937	560.326	493.428		6.32937	538.942	444.082		6.32937	532.827	439.215		6.32937	492.09	409.905		6.32937
	6.43849	426.72	450.524		6.43849	430.393	405.713		6.43849	436.525	409.88		6.43849	468.131	423.285		6.43849	448.811	407.139		6.43849	484.85	429.729		6.43849	540.791	423.315		6.43849	551.584	433.716		6.43849	549.218	490.507		6.43849	545.901	455.888		6.43849	528.766	442.788		6.43849	475.703	425.072		6.43849
	6.54762	429.974	433.382		6.54762	432.886	398.275		6.54762	431.128	408.774		6.54762	451.101	422.338		6.54762	452.734	406.606		6.54762	475.407	418.5		6.54762	538.517	431.817		6.54762	536.652	437.425		6.54762	544.511	482.999		6.54762	539.868	430.444		6.54762	523.982	448.029		6.54762	457.386	422.9		6.54762
	6.65675	433.53	418.003		6.65675	438.461	392.933		6.65675	425.955	404.431		6.65675	446.161	413.085		6.65675	445.401	399.342		6.65675	472.505	416.393		6.65675	523.859	432.813		6.65675	531.322	430.326		6.65675	548.592	479.75		6.65675	528.665	429.809		6.65675	524.008	432.751		6.65675	439.342	435.243		6.65675
	6.76587	435.033	414.479		6.76587	430.196	398.724		6.76587	427.014	404.663		6.76587	467.021	405.337		6.76587	451.412	398.555		6.76587	483.759	418.779		6.76587	520.89	433.324		6.76587	531.797	426.114		6.76587	552.316	470.903		6.76587	538.894	419.637		6.76587	519.778	447.282		6.76587	428.909	431.746		6.76587
	6.875	423.049	417.529		6.875	429.568	388.953		6.875	423.524	411.102		6.875	471.168	391.277		6.875	458.521	397.266		6.875	482.506	413.659		6.875	521.763	427.652		6.875	543.382	421.447		6.875	551.389	469.28		6.875	546.006	421.903		6.875	531.467	442.799		6.875	436.139	440.622		6.875
	6.98413	428.937	412.676		6.98413	424.903	384.922		6.98413	430.331	412.412		6.98413	455.388	417.355		6.98413	458.958	415.651		6.98413	483.797	424.609		6.98413	518.642	431.365		6.98413	556.477	427.999		6.98413	574.549	467.714		6.98413	541.419	418.236		6.98413	568.283	448.024		6.98413	447.846	447.094		6.98413
	7.09325	424.392	417.641		7.09325	433.517	394.927		7.09325	445.167	411.644		7.09325	446.757	422.177		7.09325	465.036	427.079		7.09325	471.833	430.817		7.09325	524.627	426.114		7.09325	535.748	431.288		7.09325	574.23	459.796		7.09325	566.461	430.11		7.09325	609.877	446.585		7.09325	455.474	435.185		7.09325
	7.20238	437.149	410.906		7.20238	438.511	400.767		7.20238	436.154	412.704		7.20238	445.75	427.256		7.20238	451.057	433.525		7.20238	469.314	425.546		7.20238	538.787	418.519		7.20238	542.725	425.446		7.20238	587.53	460.877		7.20238	568.085	428.426		7.20238	610.719	459.271		7.20238	473.884	439.924		7.20238
	7.31151	438.685	413.567		7.31151	433.742	403.078		7.31151	436.329	424.76		7.31151	435.935	431.3		7.31151	456.743	444.298		7.31151	471.268	431.503		7.31151	532.057	428.318		7.31151	563.87	429.848		7.31151	594.338	472.846		7.31151	593.136	447.629		7.31151	574.749	464.754		7.31151	467.701	430.014		7.31151
	7.42063	436.706	411.623		7.42063	439.773	409.329		7.42063	430.13	427.586		7.42063	455.193	445.351		7.42063	463.165	464.947		7.42063	478.472	438.316		7.42063	530.279	438.611		7.42063	565.393	431.715		7.42063	573.257	476.135		7.42063	602.185	457.933		7.42063	586.007	467.413		7.42063	486.368	427.634		7.42063
	7.52976	438.509	405.218		7.52976	441.597	406.866		7.52976	434.783	412.526		7.52976	459.96	438.545		7.52976	466.026	449.325		7.52976	473.862	446.446		7.52976	520.665	448.028		7.52976	575.087	440.004		7.52976	576.486	469.453		7.52976	597.805	467.82		7.52976	573.389	470.795		7.52976	497.764	433.681		7.52976
	7.63889	451.522	409.265		7.63889	439.941	421.206		7.63889	439.711	410.687		7.63889	446.024	430.419		7.63889	461.634	453.323		7.63889	468.091	453.686		7.63889	527.691	439.242		7.63889	557.299	439.288		7.63889	581.75	490.787		7.63889	598.14	486.147		7.63889	555.609	485.56		7.63889	468.598	419.849		7.63889
	7.74802	435.239	427.831		7.74802	435.35	425.872		7.74802	443.84	412.707		7.74802	450.599	429.95		7.74802	448.701	442.303		7.74802	475.21	454.476		7.74802	533.919	457.76		7.74802	566.53	445.707		7.74802	577.763	501.262		7.74802	612.114	484.012		7.74802	549	505.081		7.74802	459.147	408.029		7.74802
	7.85714	439.647	443.255		7.85714	422.444	425.422		7.85714	461.81	410.702		7.85714	443.425	416.28		7.85714	454.064	436.605		7.85714	465.844	465.073		7.85714	530.421	461.799		7.85714	560.449	448.434		7.85714	576.943	490.626		7.85714	605.256	487.137		7.85714	550.448	508.151		7.85714	466.134	406.378		7.85714
	7.96627	437.66	440.74		7.96627	424.229	436.026		7.96627	482.134	419.302		7.96627	439.708	428.328		7.96627	451.546	439.404		7.96627	477.968	492.755		7.96627	518.692	464.826		7.96627	555.782	450.235		7.96627	585.069	489.563		7.96627	603.447	486.146		7.96627	545.035	486.982		7.96627	450.427	402.184		7.96627
	8.0754	442.233	453.26		8.0754	430.684	440.264						8.0754	442.177	416.336		8.0754	459.529	448.306		8.0754	471.155	491.451		8.0754	527.935	474.646		8.0754	560.14	450.753		8.0754	577.92	467.342		8.0754	582.808	490.506		8.0754	533.758	475.332		8.0754	458.499	409.365		8.0754
	8.18452	430.244	461.799		8.18452	434.553	430.463										8.18452	457.082	473.083		8.18452	477.722	493.977		8.18452	516.751	482.76		8.18452	547.775	446.619		8.18452	573.119	466.341		8.18452	584.694	474.531		8.18452	537.21	458.032		8.18452	454.08	411.42		8.18452
	8.29365	444.223	448.095		8.29365	445.676	437.486														8.29365	488.174	503.821		8.29365	520.015	481.347		8.29365	538.856	456.004		8.29365	585.481	452.061		8.29365	571.654	445.747		8.29365	537.381	446.173		8.29365	464.674	399.317		8.29365
	8.40278	441.279	444.8		8.40278	442.412	443.172																		8.40278	530.648	482.224		8.40278	536.413	464.471		8.40278	582.946	441.721		8.40278	558.255	438.014		8.40278	528.908	443.143		8.40278	451.547	397.263		8.40278
	8.5119	426.219	434.059																						8.5119	512.072	475.334		8.5119	549.855	458.08		8.5119	576.052	436.31		8.5119	561.23	420.184		8.5119	506.361	441.01		8.5119	438.762	409.948		8.5119
	8.62103	439.322	417.757																						8.62103	514.294	450.986		8.62103	551.636	445.744		8.62103	565.625	427.928		8.62103	556.613	410.609		8.62103	513.495	437.539		8.62103	438.368	403.866		8.62103
	8.73016	437.804	427.524																						8.73016	506.32	455.148		8.73016	556.218	433.972		8.73016	558.738	428.369		8.73016	546.507	413.557		8.73016	512.723	431.223		8.73016	446.028	405.447		8.73016
																									8.83929	502.04	440.808		8.83929	524.955	439.238		8.83929	562.382	417.733		8.83929	555.176	409.617		8.83929	510.575	427.627		8.83929	437.409	384.654		8.83929
																									8.94841	501.325	435.565		8.94841	531.959	448.334		8.94841	548.308	413.776		8.94841	533.909	391.791		8.94841	498.027	425.449		8.94841	443.273	396.6		8.94841
																									9.05754	500.552	440.349		9.05754	530.657	444.339		9.05754	532.112	408.289		9.05754	523.634	390.247		9.05754	498.241	408.558		9.05754	428.479	404.298		9.05754
																																	9.16667	544.909	406.194		9.16667	515.03	404.905		9.16667	498.771	412.694		9.16667	424.346	390.854		9.16667
																																					9.27579	525.427	411.821		9.27579	497.99	417.09		9.27579	437.758	405.03		9.27579
																																													9.38492	454.327	402.616		9.38492
[truncated: 44 more columns]

## Sheet: exp2 pooled
both Rab7 and Snx1 normalised for individual min-max
	Rab7	Snx1
	0.689965	0.493751
	0.581518	0.38898
	0.530278	0.389737
	0.443294	0.22968
	0.345097	0.245741
	0.274755	0.360544
	0.30805	0.207785
	0.230013	0.221494
	0.222659	0.208265
	0.213706	0.190674
	0.149107	0.178657
	0.14319	0.14411
	0.122528	0.143451
	0.0866154	0.125901
	0.130312	0.0567588
	0.121879	0.159626
	0.0508095	0.10482
	0.0311142	0.0688494
	0.0194939	0.0974647
	0.0246051	0.124648
	0.0410401	0.189934
	0.0103621	0.156477
	0.0166923	0.0400875
	0	0
	0.0299119	0.0974078
	0.0479799	0.145957
	0.0487628	0.073064
	0.0376905	0.048891
	0.036874	0.152954
	0.0676415	0.0116675
	0.0596449	0.167364
	0.183481	0.188038
	0.219947	0.19292
	0.257671	0.199364
	0.290183	0.213773
	0.301015	0.233715
	0.34257	0.0290059
	0.404753	0.0082258
	0.426294	0.0972857
	0.539919	0.13254
	0.522684	0.102208
	0.596102	0.0933315
	0.553843	0.0779783
	0.518904	0.154752
	0.48373	0.131841
	0.430689	0.0729582
	0.391852	0.0651799
	0.401096	0.0523652
	0.329199	0.111223
	0.274346	0.159854
	0.302788	0.0730965
	0.450988	0.0688738
	0.509397	0.128676
	0.618409	0.195287
	0.604133	0.135852
	0.591047	0.22195
	0.554587	0.246156
	0.591114	0.281654
	0.548475	0.285731
	0.641543	0.394253
	0.697005	0.43434
	0.761566	0.378655
	0.8519	0.540535
	0.903638	0.536329
	0.879961	0.593942
	1	0.472605
	0.886996	0.503865
	0.925424	0.564618
	0.895977	0.648349
	0.834039	0.623053
	0.786154	0.560363
	0.893505	0.56946
	0.849227	0.647536
	0.881359	0.719973
	0.907502	0.932623
	0.942173	0.959302
	0.912003	0.942452
	0.922159	1
	0.954911	0.997388
	0.897883	0.820595
	0.789968	0.639692
	0.719279	0.513116
	0.703459	0.49546
	0.688606	0.449283
	0.564684	0.385479
	0.481071	0.537118
	0.420568	0.56678
	0.29228	0.58872
	0.327559	0.558432
	0.273649	0.376047
	0.229982	0.397895
	0.229364	0.238122
	0.167398	0.206903
	0.202111	0.14007
	0.179986	0.0921766
	0.105011	0.115085
	0.0444151	0.00820348
	0.0401584	0.0682377
	0.0524458	0.0359732
	0.0645307	0.0106607
	0.0563807	0.132522
	0.0747572	0.0729842
	0.0405581	0.0743044
	0.0289716	0.0513194
	0.0219636	0.0878421
	0	0.0815845
	0.0212472	0.0382244
	0.0113582	0.0126601
	0.0130297	0.00605913
	0.0788841	0.0913295
	0.119468	0.171456
	0.171753	0.151257
	0.175366	0.165458
	0.238324	0.102395
	0.318812	0.0633308
	0.330108	0.041109
	0.40445	0.126746
	0.474462	0.155591
	0.495741	0.203492
	0.591216	0.143328
	0.601318	0.10009
	0.646169	0.114406
	0.571723	0.153531
	0.491006	0.174082
	0.448128	0.115917
	0.450443	0.0641855
	0.472287	0.0602326
	0.447354	0.0354314
	0.399456	0.0537003
	0.378297	0.166267
	0.362215	0.195823
	0.44453	0.191282
	0.439583	0.132965
	0.446451	0.0375681
	0.432664	0.123937
	0.496436	0
	0.441898	0.0446498
	0.44045	0.109843
	0.556767	0.173692
	0.542694	0.11259
	0.507639	0.15025
	0.487918	0.122548
	0.573571	0.107088
	0.601826	0.226332
	0.604282	0.256292
	0.630528	0.240274
	0.716612	0.380557
	0.773408	0.365791
	0.749482	0.460333
	0.748641	0.52661
	0.744068	0.586026
	0.81827	0.641748
	0.910017	0.655843
	0.935506	0.817379
	0.93019	0.827979
	1	0.962646
	0.866459	1
	0.949252	0.873712
	0.971958	0.844264
	0.939233	0.774057
	0.940878	0.613834
	0.922242	0.552281
	0.877832	0.372911
	0.772894	0.387151
	0.742578	0.343989
	0.693455	0.440492
	0.882014	0.397198
	0.835805	0.22664
	0.77901	0.369182
	0.699767	0.376468
	0.573356	0.32353
	0.473985	0.200029
	0.392789	0.258466
	0.389703	0.377391
	0.372837	0.348437
	0.3018	0.485377
	0.212796	0.766427
	0.15409	0.843008
	0.176741	1
	0.0773268	0.857275
	0.0475015	0.691666
	0.0273032	0.55271
	0.0399513	0.390795
	0.0237186	0.215504
	0.0176387	0.17523
	0.0130023	0.15854
	0.00291384	0.169302
	0.00239332	0.151559
	0	0.187738
	0.00829076	0.174769
	0.0390176	0.235365
	0.0450116	0.217262
	0.0503188	0.192084
	0.0751481	0.263952
	0.118056	0.218525
	0.160052	0.27153
	0.190967	0.277961
	0.254057	0.253441
	0.257239	0.325683
	0.41295	0.26457
	0.317818	0.239989
	0.415982	0.159029
	0.447808	0.0844577
	0.43427	0.159416
	0.452177	0.0732741
	0.430148	0
	0.332317	0.161643
	0.298478	0.158465
	0.443161	0.0129016
	0.405695	0.0401306
	0.42519	0.111802
	0.448533	0.158458
	0.39302	0.0859923
	0.368341	0.0495692
	0.400414	0.0626812
	0.37727	0.0868615
	0.37119	0.12342
	0.397865	0.0499902
	0.405544	0.109018
	0.462174	0.121451
	0.502415	0.107993
	0.535964	0.187365
	0.590801	0.189762
	0.655115	0.17538
	0.597874	0.216814
	0.635046	0.163313
	0.655399	0.206439
	0.793638	0.234258
	0.780909	0.368842
	0.851636	0.344485
	0.73388	0.386823
	0.737846	0.425174
	0.766979	0.459533
	0.813874	0.52821
	0.786592	0.664471
	0.904616	0.71129
	0.893143	0.705193
	0.872097	0.700609
	0.898804	0.717313
	0.880586	0.665327
	0.899615	0.672429
	1	0.618963
	0.930384	0.527457
	0.852221	0.456294
	0.862862	0.338109
	0.831952	0.375266
	0.882405	0.296763
	0.851432	0.345572
	0.881761	0.392941
	0.887107	0.575182
	0.854623	0.675852
	0.825215	0.514386
	0.67026	0.463409
	0.578972	0.426605
	0.497484	0.340585
	0.470687	0.2682
	0.41691	0.252171
	0.347716	0.207352
	0.338411	0.153183
	0.237445	0.153868
	0.212835	0.104487
	0.172826	0.136676
	0.190662	0.175388
	0.169737	0.160911
	0.0894626	0.130917
	0.0711193	0.169776
	0.0806416	0.0511159
	0.0504831	0
	0.0605285	0.0657056
	0.0186494	0.146782
	0	0.146582
	0.0547684	0.0915975
	0.0371875	0.192433
	0.0622092	0.231926
	0.0742526	0.238101
	0.121936	0.163158
	0.147353	0.152706
	0.170316	0.167243
	0.177918	0.225793
	0.256562	0.196917
	0.280337	0.129425
	0.31793	0.201549
	0.40343	0.275946
	0.510936	0.203987
	0.624001	0.288246
	0.750813	0.308907
	0.722179	0.379696
	0.836635	0.450103
	0.876901	0.632578
	0.816372	0.707018
	0.77781	0.659892
	0.684975	0.381066
	0.666298	0.255423
	0.624235	0.202755
	0.594076	0.257817
	0.515705	0.216555
	0.425191	0.170965
	0.376967	0.322491
	0.399596	0.310885
	0.419787	0.264852
	0.375309	0.25224
	0.493349	0.319212
	0.468979	0.33597
	0.531728	0.294639
	0.656653	0.257479
	0.674879	0.39295
	0.66386	0.307138
	0.80739	0.38569
	0.824959	0.460277
	0.856465	0.573768
	0.874285	0.654306
	0.826251	0.720281
	0.815348	0.771544
	0.769824	0.84497
	0.733504	0.891054
	0.712863	0.992289
	0.713013	0.915767
	0.796482	1
	0.803589	0.992523
	0.843408	0.840338
	0.889979	0.963396
	0.904605	0.778214
	0.940852	0.73625
	1	0.637002
	0.973042	0.598021
	0.922225	0.528767
	0.924184	0.477703
	0.959028	0.481763
	0.920394	0.367153
	0.882549	0.49061
	0.906564	0.467538
	0.898494	0.595002
	0.74702	0.375233
	0.636778	0.381711
	0.596055	0.512389
	0.558488	0.559462
	0.532862	0.569473
	0.446997	0.482479
	0.332295	0.357399
	0.288791	0.203769
	0.199018	0.123298
	0.156194	0.171457
	0.165336	0.151878
	0.122055	0.184145
	0.0807978	0.199593
	0.108476	0.164061
	0.144013	0.146532
	0.200328	0.187731
	0.101569	0.0974257
	0.0126766	0.0914375
	0.0616436	0.0881795
	0.157649	0.0316314
	0.135707	0.0737098
	0.143305	0.103705
	0.098079	0.108637
	0.060891	0.0894032
	0.0466034	0.110259
	0.000696821	0.160673
	0	0.156222
	0.0388157	0.133516
	0.038236	0.11224
	0.0884071	0.17073
	0.134453	0.259124
	0.131471	0.346562
	0.18856	0.365758
	0.199191	0.361467
	0.28689	0.327786
	0.32856	0.338615
	0.441367	0.169262
	0.494977	0.129371
	0.480974	0.0912539
	0.519762	0.082436
	0.442069	0.0200985
	0.439806	0
	0.473025	0.107888
	0.490997	0.165537
	0.397612	0.185529
	0.439627	0.206117
	0.354833	0.126403
	0.319651	0.128637
	0.304054	0.0670333
	0.359504	0.0337346
	0.3209	0.0680734
	0.347731	0.0706124
	0.392935	0.127489
	0.474251	0.0927912
	0.554937	0.171679
	0.639063	0.189812
	0.677472	0.215807
	0.720803	0.277907
	0.796121	0.200526
	0.816764	0.281387
	0.843722	0.313836
	0.779949	0.36032
	0.770294	0.412776
	0.772708	0.398093
	0.73659	0.563944
	0.700891	0.602382
	0.692456	0.744754
	0.764335	0.751889
	0.820978	0.911438
	0.808904	0.964713
	0.885889	1
	0.895661	0.959245
	0.911097	0.931039
	0.883792	0.876503
	0.928133	0.771559
	0.925998	0.692152
	1	0.550422
	0.892327	0.522056
	0.923612	0.421724
	0.812014	0.340199
	0.80955	0.441823
	0.799873	0.372893
	0.745309	0.383485
	0.686778	0.364032
	0.558292	0.366084
	0.561694	0.262333
	0.622356	0.243188
	0.573285	0.292084
	0.544115	0.294347
	0.566089	0.245268
	0.589456	0.370674
	0.541142	0.338479
	0.385475	0.295321
	0.252989	0.177648
	0.246541	0.0952471
	0.183268	0.0157484
	0.144296	0.053712
	0.114256	0.00954362
	0.0810919	0.011464
	0.0723365	0
	0.00851592	0.0111294
	0	0.0754543
	0.00340246	0.0874202
	0.0370702	0.144224
	0.0319909	0.213357
	0.0313065	0.214499
	0.0220866	0.220544
	0.0419245	0.261642
	0.0800898	0.269738
	0.0705423	0.26269
	0.113567	0.126126
	0.142507	0.174855
	0.153951	0.145555
	0.195275	0.184937
	0.20557	0.241311
	0.19177	0.286229
	0.248844	0.194611
	0.330151	0.189534
	0.427052	0.274546
	0.42276	0.253037
	0.488165	0.251109
	0.508213	0.205261
	0.606772	0.24521
	0.614843	0.191964
	0.673115	0.263424
	0.732228	0.25874
	0.651805	0.149352
	0.53225	0.112749
	0.473685	0.153884
	0.418957	0.142783
	0.324201	0.156211
	0.368609	0.224086
	0.459063	0.204344
	0.4662	0.11245
	0.517902	0.237056
	0.637237	0.262275
	0.601707	0.224166
	0.662692	0.199034
	0.671902	0.268531
	0.655887	0.294339
	0.706905	0.33426
	0.732492	0.278176
	0.625334	0.290295
	0.71085	0.490158
	0.601042	0.461294
	0.600319	0.477341
	0.602748	0.597037
	0.5285	0.661994
	0.488566	0.599793
	0.574072	0.683075
	0.660839	0.847942
	0.731543	0.954435
	0.83193	0.972948
	0.900077	0.983008
	0.948328	0.94583
	1	1
	0.939714	0.916777
	0.86771	0.86767
	0.799822	0.742184
	0.807023	0.646791
	0.846572	0.616211
	0.752007	0.625871
	0.772729	0.517341
	0.649938	0.507201
	0.695583	0.366855
	0.619348	0.456202
	0.646192	0.376719
	0.621467	0.441013
	0.68719	0.414936
	0.643839	0.413121
	0.629426	0.42187
	0.607282	0.45022
	0.501891	0.457047
	0.416922	0.416918
	0.352702	0.250236
	0.320869	0.217366
	0.279624	0.153988
	0.249897	0.1539
	0.211133	0.0543569
	0.149358	0.068347
	0.120252	0
	0.134844	0.201147
	0.0656083	0.150103
	0.0769565	0.0565242
	0.0321623	0.163229
	0	0.187342
	0.0128512	0.197482
	0.0264334	0.277132
	0.0154415	0.296153
	0.0247796	0.261689
	0.0909224	0.305879
	0.102207	0.25265
	0.151537	0.284198
	0.21286	0.262746
	0.170387	0.223868
	0.230084	0.316063
	0.287921	0.275335
	0.299091	0.217128
	0.349449	0.268472
	0.437475	0.354086
	0.478862	0.421235
	0.524172	0.507369
	0.507186	0.432838
	0.503216	0.301236
	0.473306	0.339101
	0.46601	0.36065
	0.4532	0.269388
	0.502284	0.254121
	0.471342	0.21075
	0.392389	0.202319
	0.403591	0.166789
	0.399059	0.219234
	0.430385	0.0863015
	0.431527	0.186399
	0.481077	0.175687
	0.53806	0.130774
	0.584901	0.177528
	0.533752	0.181765
	0.532779	0.248183
	0.582315	0.235999
	0.691023	0.300831
	0.659546	0.365645
	0.633789	0.492067
	0.669958	0.534768
	0.578405	0.675154
	0.593965	0.783251
	0.580072	0.786211
	0.61133	0.853307
	0.594563	0.993119
	0.589945	1
	0.638517	0.957184
	0.739591	0.84736
	0.806958	0.936895
	0.881548	0.869878
	0.888035	0.720736
	0.990397	0.742593
	1	0.832639
	0.945329	0.776811
	0.837137	0.836268
	0.73589	0.749174
	0.764256	0.638557
	0.708799	0.559013
	0.698419	0.5728
	0.630559	0.456933
	0.636543	0.460492
	0.630266	0.459699
	0.490763	0.447876
	0.436233	0.452008
	0.414476	0.531423
	0.339346	0.45979
	0.456037	0.318889
	0.443994	0.425857
	0.464549	0.30846
	0.385283	0.37051
	0.39402	0.439223
	0.401011	0.484066
	0.325814	0.524081
	0.301081	0.467067
	0.202476	0.338112
	0.18971	0.307954
	0.17469	0.172404
	0.139923	0.0649459
	0.0787228	0
	0.0821217	0.0911467
	0.0323311	0.151388
	0.0192012	0.0847583
	0.0286573	0.0900764
	0.000913168	0.134696
	0	0.204595
	0.0113071	0.175789
	0.0653603	0.188765
	0.0596133	0.274925
	0.060054	0.393127
	0.103745	0.352117
	0.0866205	0.381728
	0.146033	0.48614
	0.159512	0.434005
	0.240741	0.430221
	0.263736	0.42701
	0.330105	0.373323
	0.363018	0.417569
	0.439174	0.411695
	0.495998	0.363243
	0.549226	0.223876
	0.5408	0.109101
	0.466453	0.197169
	0.367411	0.292141
	0.351358	0.260215
	0.323628	0.19137
	0.303383	0.333143
	0.313495	0.24358
	0.306158	0.288938
	0.315706	0.344766
	0.318671	0.241457
	0.342533	0.378981
	0.38365	0.482515
	0.387183	0.362065
	0.414779	0.442285
	0.406138	0.362537
	0.403187	0.480706
	0.392179	0.488107
	0.40263	0.428529
	0.464016	0.460081
	0.472933	0.451129
	0.489289	0.616215
	0.50538	0.673536
	0.579019	0.683044
	0.538057	0.747625
	0.525703	0.588612
	0.477407	0.577179
	0.463163	0.56534
	0.461481	0.626212
	0.513225	0.725407
	0.610634	0.803154
	0.670135	0.893704
	0.705745	0.970613
	0.881563	0.896417
	0.935267	0.797728
	1	0.919456
	0.976561	1
	0.89292	0.939277
	0.817648	0.831877
	0.754756	0.805403
	0.693595	0.769213
	0.685384	0.672425
	0.665255	0.655333
	0.558675	0.587227
	0.488919	0.492911
	0.492991	0.467564
	0.610837	0.564111
	0.559936	0.552248
	0.514924	0.349719
	0.490715	0.356291
	0.508104	0.198261
	0.436936	0.362683
	0.438173	0.275239
	0.411636	0.265931
	0.355971	0.187384
	0.357123	0.253241
	0.331179	0.264665
	0.245562	0.181878
	0.202013	0.0924757
	0.201044	0.0558583
	0.181478	0.0199391
	0.143554	0.10197
	0.117784	0.0360415
	0.161253	0.0149435
	0.160406	0
	0.0996472	0.0510571
	0.0778515	0.0948439
	0.0492592	0.175536
	0.0360613	0.247972
	0.0543907	0.274569
	0.0317624	0.257423
	0.0130568	0.213154
	0.000451531	0.208194
	0	0.216508
	0.0545741	0.211182
	0.0882508	0.222397
	0.194699	0.149399
	0.269973	0.209166
	0.292728	0.186585
	0.376238	0.220568
	0.463906	0.138098
	0.481595	0.0787775
	0.476186	0.130036
	0.55876	0.202126
	0.600009	0.184167
	0.552603	0.163947
	0.515583	0.114178
	0.536052	0.264881
	0.60753	0.136608
	0.639594	0.114898
	0.681313	0.205898
	0.651785	0.0307796
	0.665834	0.136774
	0.536024	0.164983
	0.515785	0.115172
	0.526622	0.216436
	0.595424	0.247598
	0.485109	0.188975
	0.541386	0.158707
	0.486717	0.119462
	0.539848	0.258546
	0.562514	0.369665
	0.534199	0.337712
	0.556521	0.252651
	0.472767	0.332465
	0.434791	0.278226
	0.467734	0.248029
	0.497883	0.246129
	0.463078	0.264693
	0.452142	0.264175
	0.5272	0.376129
	0.495903	0.403893
	0.562001	0.465517
	0.616787	0.505647
	0.662546	0.552723
	0.848789	0.56568
	0.933409	0.547282
	0.911171	0.589406
	1	0.616658
	0.972602	0.656198
	0.973581	0.67898
	0.892766	0.766597
	0.893472	0.845727
	0.945369	0.892242
	0.856408	0.906149
	0.784135	1
	0.747053	0.84865
	0.762796	0.730441
	0.619105	0.572094
	0.636205	0.747776
	0.529192	0.480903
	0.468184	0.54836
	0.451207	0.448116
	0.342881	0.444601
	0.301392	0.322963
	0.236033	0.30156
	0.149715	0.267244
	0.0989779	0.214099
	0.0118853	0.179015
	0.058967	0.156126
	0.0795499	0.105987
	0.0528691	0.152801
	0.017594	0.207907
	0	0.0528339
	0.0355276	0.0603223
	0.0477896	0.137211
	0.0699746	0.16086
	0.100187	0.144077
	0.150795	0.0318541
	0.160317	0.0266113
	0.172968	0.0983175
	0.16798	0.208485
	0.211514	0.16821
	0.149069	0.132331
	0.133272	0.186383
	0.157158	0.210765
	0.123597	0.155841
	0.137449	0.194847
	0.176748	0.120506
	0.165442	0.0779768
	0.23925	0.0814058
	0.23641	0.203424
	0.20968	0.135095
	0.195542	0.149683
	0.181459	0.151695
	0.178072	0.0904749
	0.214763	0.125775
	0.271064	0.148716
	0.316465	0.132668
	0.308061	0.098447
	0.312888	0.0741851
	0.331447	0.0548032
	0.373288	0.0106238
	0.386812	0
	0.383351	0.0650469
	0.411754	0.0641486
	0.458145	0.132771
	0.476559	0.159365
	0.499567	0.131666
	0.534698	0.17537
	0.488878	0.229068
	0.510099	0.242948
	0.415497	0.270181
	0.425602	0.274102
	0.436506	0.274793
	0.395709	0.34808
	0.403239	0.292888
	0.439197	0.253157
	0.407768	0.341144
	0.416888	0.352606
	0.317943	0.343399
	0.381447	0.426972
	0.395866	0.533616
	0.392827	0.760093
	0.453305	0.854005
	0.566897	0.907901
	0.681473	0.792093
	0.788785	0.681701
	0.935287	0.762166
	0.962175	0.812305
	0.983499	0.855292
	1	0.851207
	0.902537	0.861675
	0.904144	0.86348
	0.940963	0.821348
	0.95161	0.818782
	0.881044	0.775562
	0.842415	0.981922
	0.812166	0.921617
	0.787261	0.879986
	0.766459	1
	0.718106	0.808746
	0.607731	0.777825
	0.641541	0.739026
	0.639316	0.992462
	0.582649	0.853508
	0.538362	0.855278
	0.487175	0.751966
	0.389827	0.664156
	0.325599	0.727858
	0.278251	0.522406
	0.193697	0.655909
	0.205951	0.509982
	0.149559	0.497006
	0.174864	0.525244
	0.187067	0.274185
	0.161758	0.337988
	0.115079	0.395678
	0.0579653	0.430222
	0.0647858	0.371565
	0.00659257	0.357144
	0	0.234046
	0.0632831	0.332414
	0.10288	0.322475
	0.0439194	0.280893
	0.184652	0.36288
	0.339668	0.401029
	0.480913	0.333538
	0.56878	0.214452
	0.70038	0.149868
	0.714249	0.341699
	0.660769	0.214238
	0.656037	0.182234
	0.516598	0.138851
	0.348001	0.105546
	0.323255	0.239847
	0.259562	0.194034
	0.178399	0.198355
	0.243832	0.155694
	0.233424	0.156
	0.240333	0.175618
	0.289533	0
	0.37212	0.125175
	0.428387	0.138382
	0.509777	0.113146
	0.553673	0.158496
	0.563495	0.0883147
	0.549026	0.0891658
	0.496215	0.0730058
	0.418472	0.123424
	0.44762	0.171751
	0.470571	0.262672
	0.457199	0.362796
	0.508572	0.448919
	0.467351	0.349573
	0.54669	0.419842
	0.633896	0.403723
	0.657922	0.426748
	0.607982	0.601712
	0.510819	0.506812
	0.451956	0.437131
	0.412457	0.417818
	0.32967	0.495756
	0.385914	0.476569
	0.390394	0.604387
	0.380517	0.459473
	0.365955	0.384845
	0.395582	0.533037
	0.395461	0.600078
	0.416099	0.602445
	0.521818	0.490119
	0.639535	0.586718
	0.772726	0.752554
	0.851269	0.619504
	0.945124	0.561712
	0.921033	0.535054
	0.946329	0.636611
	0.862459	0.668844
	0.93828	0.614446
	1	0.729188
	0.953833	0.770823
	0.862282	0.666603
	0.821177	0.720169
	0.80106	0.629255
	0.757899	0.808234
	0.65118	0.810233
	0.657024	0.846114
	0.64596	1
	0.630917	0.645026
	0.577789	0.719816
	0.573581	0.741617
	0.459945	0.894038
	0.313974	0.922832
	0.237264	1
	0.161413	0.998235
	0.201253	0.814774
	0.104091	0.681162
	0.0977987	0.696184
	0	0.642971
	0.0126954	0.588217
	0.0945797	0.53435
	0.142929	0.524241
	0.17912	0.558296
	0.26409	0.593222
	0.251236	0.479496
	0.120216	0.415884
	0.0971798	0.374678
	0.0595706	0.341948
	0.127436	0.322865
	0.196564	0.177006
	0.361811	0.208609
	0.44661	0.240411
	0.400074	0.197978
	0.445849	0.227791
	0.476057	0.181555
	0.432221	0.223599
	0.37574	0.273762
	0.302894	0.253171
	0.269974	0.21368
	0.214864	0.253254
	0.188927	0.170676
	0.115076	0.140871
	0.154533	0
	0.165501	0.0222646
	0.157992	0.074566
	0.123031	0.0207648
	0.174182	0.0166384
	0.205435	0.112731
	0.178127	0.106832
	0.253118	0.105912
	0.354501	0.0508017
	0.444577	0.114828
	0.481997	0.174777
	0.563245	0.109931
	0.522473	0.184132
	0.461832	0.247007
	0.464441	0.311356
	0.466998	0.409164
	0.419714	0.332013
	0.490253	0.348005
	0.49899	0.455268
	0.512747	0.497692
	0.492423	0.477151
	0.472069	0.405676
	0.397736	0.453296
	0.338019	0.483299
	0.331921	0.475436
	0.374086	0.42045
	0.295554	0.406322
	0.364287	0.51907
	0.410174	0.532494
	0.403207	0.435274
	0.523491	0.459104
	0.603626	0.478759
	0.644777	0.510701
	0.735635	0.490765
	0.83263	0.559282
	0.912692	0.508249
	0.895209	0.638994
	0.888075	0.627568
	0.925516	0.632133
	1	0.543539
	0.974386	0.618072
	0.952669	0.648987
	0.914334	0.642416
	0.868026	0.651216
	0.80815	0.660455
	0.736847	0.647661
	0.776992	0.499847
	0.68793	0.658127
	0.713919	0.622571
	0.631587	0.649608
	0.742467	0.671091
	0.707519	0.679007
	0.611964	0.579512
	0.582888	0.548525
	0.49587	0.467753
	0.466331	0.418351
	0.338822	0.44175
	0.259861	0.370798
	0.176371	0.258933
	0.106459	0.193199
	0.0858993	0.103641
	0.0710418	0.0827125
	0	0.0787675
	0.0239488	0.0725955
	0.0225473	0.0869651
	0.0258353	0.093609
	0.0217639	0.160515
	0.0123421	0.146008
	0.0534985	0.153219
	0.0929869	0.117226
	0.0680789	0.0493231
	0.0501625	0.0168988
	0.104786	0.0503359
	0.247727	0.136368
	0.358902	0.0870181
	0.456568	0.0546521
	0.453557	0.0316661
	0.47717	0.0494981
	0.50106	0.0686876
	0.435742	0
	0.358556	0.0605431
	0.279462	0.125853
	0.286517	0.1869
	0.328484	0.304306
	0.274426	0.334323
	0.301588	0.278208
	0.306523	0.207012
	0.360421	0.138706
	0.365654	0.0853213
	0.443709	0.0815301
	0.479979	0.102978
	0.526683	0.0775373
	0.607876	0.0936779
	0.717485	0.0514335
	0.710226	0.148129
	0.708884	0.127476
	0.786661	0.155578
	0.789065	0.14105
	0.722899	0.13342
	0.764615	0.126065
	0.865494	0.182287
	0.85919	0.242931
	0.853429	0.281803
	0.868569	0.286204
	0.916829	0.235528
	0.848228	0.29876
	0.766107	0.2317
	0.641082	0.221551
	0.605292	0.243933
	0.562073	0.127709
	0.530802	0.172339
	0.491079	0.183326
	0.437479	0.182313
	0.526821	0.197181
	0.580624	0.197415
	0.75725	0.237644
	0.768425	0.238392
	0.832784	0.228444
	0.923475	0.320664
	0.997256	0.371689
	1	0.443018
	0.982798	0.549018
	0.956504	0.698064
	0.888031	0.833562
	0.911127	0.918385
	0.905793	1
	0.873562	0.989835
	0.865489	0.893575
	0.774197	0.789435
	0.813445	0.66451
	0.815348	0.652113
	0.773504	0.581936
	0.693578	0.629398
	0.755625	0.669585
	0.675618	0.643607
	0.675258	0.568046
	0.533451	0.541173
	0.536249	0.455102
	0.436144	0.418797
	0.351612	0.417159
	0.274231	0.450817
	0.296312	0.441013
	0.166013	0.420924
	0.143583	0.315509
	0.132182	0.325166
	0.0800202	0.333529
	0.088159	0.203888
	0.0997397	0.205535
	0.0744073	0.116582
	0.0570544	0.150691
	0.0494042	0
	0.0655328	0.0506191
	0.0297362	0.22685
	0	0.118062
	0.0622556	0.157132
	0.0844343	0.233615
	0.0841308	0.0597076
	0.145471	0.140779
	0.121239	0.0977676
	0.195899	0.0341775
	0.178376	0.0639529
	0.333843	0.0691883
	0.389379	0.128621
	0.436309	0.170701
	0.482374	0.0917674
	0.454156	0.0339618
	0.429184	0.0612469
	0.422959	0.0936204
	0.361156	0.0351971
	0.337845	0.0710511
	0.332011	0.117856
	0.351381	0.0681098
	0.464008	0.11519
	0.548458	0.142524
	0.673344	0.155122
	0.662577	0.238331
	0.673082	0.287754
	0.68242	0.329412
	0.724832	0.385482
	0.768567	0.374962
	0.860477	0.374854
	0.886442	0.382256
	0.878149	0.498466
	0.861902	0.634077
	0.780472	0.666745
	0.779335	0.673941
	0.721931	0.782258
	0.64473	0.801131
	0.627624	0.742198
	0.56349	0.797857
	0.611542	0.814289
	0.569808	0.735884
	0.589955	0.719541
	0.484052	0.664363
	0.610821	0.810161
	0.511761	0.629342
	0.5907	0.597969
	0.678659	0.601665
	0.746414	0.542908
	0.887321	0.535457
	0.830833	0.385502
	0.93208	0.626509
	0.899849	0.546389
	0.876667	0.507025
	0.862524	0.584213
	0.827494	0.660451
	0.819515	0.646558
	0.89278	0.742483
	0.890393	0.786807
	1	0.744355
	0.989628	0.711815
	0.934066	0.757493
	0.896325	0.903683
	0.85259	0.935165
	0.914737	1
	0.774309	0.755169
	0.672326	0.767376
	0.681432	0.631362
	0.508233	0.453212
	0.449856	0.404119
	0.410696	0.361877
	0.418528	0.205983
	0.409594	0.161331
	0.349234	0.155488
	0.310231	0.0932841
	0.227965	0.0536742
	0.190949	0.0933112
	0.0932253	0.0353694
	0.0568995	0.0732463
	0.102448	0.108128
	0.0770522	0.0882476
	0.0418767	0.0895256
	0	0.12352
	0.0750991	0.0700998
	0.0287435	0.0806819
	0.0264918	0.0569453
	0.126986	0.0489681
	0.172911	0.0141131
	0.291213	0.086612
	0.288242	0.071053
	0.319702	0.0608933
	0.458745	0.0392091
	0.418185	0.0601892
	0.409315	0.0124668
	0.357869	0.002567
	0.268887	0
	0.247682	0.0548548
	0.28999	0.0931487
	0.238068	0.0690763
	0.261491	0.073555
	0.315013	0.0937823
	0.336527	0.120817
	0.444339	0.0741344
	0.509193	0.082924
	0.594322	0.0887891
	0.576205	0.181591
	0.574052	0.151199
	0.579255	0.183882
	0.618782	0.125561
	0.628112	0.194215
	0.748524	0.192802
	0.860497	0.318747
	0.889148	0.182853
	0.999677	0.183877
	1	0.19721
	0.811498	0.231144
	0.696706	0.23559
	0.582275	0.264331
	0.536737	0.277009
	0.528929	0.258038
	0.542077	0.277664
	0.513569	0.270602
	0.511963	0.305376
	0.488159	0.252455
	0.470635	0.284791
	0.427637	0.292536
	0.475603	0.228436
	0.449528	0.222593
	0.547065	0.199338
	0.49419	0.272449
	0.592002	0.314014
	0.654707	0.264748
	0.789451	0.425256
	0.825939	0.623863
	0.812081	0.849272
	0.863787	0.990902
	0.827167	1
	0.84571	0.779785
	0.782672	0.656817
	0.675275	0.451338
	0.712394	0.410569
	0.718415	0.421915
	0.718498	0.439375
	0.732473	0.281872
	0.819105	0.313185
	0.837373	0.341146
	0.715708	0.420247
	0.738764	0.429156
	0.595874	0.517479
	0.52007	0.567758
	0.506814	0.432437
	0.578172	0.531923
	0.505315	0.409888
	0.315373	0.332826
	0.466667	0.347705
	0.261314	0.273737
	0.224614	0.214129
	0.256407	0.228107
	0.160165	0.229364
	0.126459	0.256273
	0.101903	0.190213
	0.106432	0.180819
	0.0941	0.125755
	0	0.144985
	0.0177016	0.0828885
	0.0388133	0.0562547
	0.145731	0.0825018
	0.202537	0.0571604
	0.313476	0.0758459
	0.350468	0.0348927
	0.38687	0.026354
	0.378022	0.0834075
	0.287384	0.0770213
	0.194209	0.0425459
	0.150712	0.0724975
	0.148227	0.0723398
	0.144355	0.0956762
	0.227922	0.105289
	0.223883	0.144909
	0.350582	0.150995
	0.4938	0.211687
	0.561687	0.206084
	0.552302	0.137006
	0.524827	0.0545347
	0.524102	0.0579288
	0.476898	0.0607479
	0.47034	0.0920633
	0.445259	0.117201
	0.476692	0.105665
	0.59388	0.0334119
	0.663658	0.0427037
	0.735784	0.0127368
	0.835733	0.00992281
	0.974302	0
	0.997932	0.00653379
	0.955732	0.0459553
	0.816878	0.105675
	0.755411	0.136782
	0.790557	0.156475
	0.695857	0.180483
	0.708892	0.265845
	0.676956	0.249754
	0.64875	0.245292
	0.605093	0.261896
	0.61121	0.245063
	0.624457	0.261397
	0.645146	0.220551
	0.690436	0.230687
	0.817952	0.266817
	0.803517	0.307973
	0.979762	0.377209
	1	0.353221
	0.916987	0.414504
	0.84052	0.52054
	0.882178	0.472168
	0.874044	0.321377
	0.886268	0.21736
	0.832643	0.268287
	0.910738	0.22107
	0.800387	0.180941
	0.826154	0.180254
	0.972942	0.205468
	0.966379	0.227064
	0.921956	0.296361
	0.923173	0.328709
	0.929902	0.465675
	0.930622	0.658686
	0.881173	0.838676
	0.796189	1
	0.782292	0.949368
	0.632522	0.706845
	0.584432	0.530824
	0.494286	0.393027
	0.508267	0.510088
	0.416095	0.408298
	0.388746	0.341607
	0.310939	0.309748
	0.289255	0.250822
	0.193963	0.201632
	0.169058	0.113821
	0.142081	0.0777335
	0.101623	0.109871
	0.00250315	0.0990667
	0.040064	0.0948035
	0	0.0736805
	0.0272989	0.0515374
	0.0392659	0.0158707
	0.00821687	0.048129
	0.0489928	0.106501
	0.0820644	0.177203
	0.0457959	0.162911
	0.0360418	0.216568
	0.03104	0.218409
	0.00740516	0.201373
	0.0295934	0.18778
	0.0630912	0.155129
	0.08469	0.161584
	0.10915	0.214717
	0.182272	0.1642
	0.159404	0.0848779
	0.152924	0.0742871
	0.201594	0.0350809
	0.241672	0.0858773
	0.272327	0.204595
	0.36273	0.270646
	0.367523	0.274671
	0.349144	0.2461
	0.431998	0.147561
	0.307996	0.0672599
	0.391471	0.0789501
	0.417627	0.0331027
	0.538799	0.064203
	0.609073	0.0256963
	0.702297	0.00252276
	0.819778	0
	0.776816	0.000902956
	0.730435	0.0471123
	0.600861	0.0496523
	0.60019	0.0387031
	0.486731	0.0711785
	0.475458	0.122047
	0.528065	0.118825
	0.455202	0.0782539
	0.519817	0.126724
	0.559355	0.14815
	0.531103	0.16795
	0.569172	0.14803
	0.532432	0.139359
	0.490808	0.16155
	0.565209	0.157466
	0.619063	0.172671
	0.627466	0.252821
	0.68453	0.292065
	0.860087	0.426478
	0.969781	0.541012
	1	0.675232
	0.97632	0.861241
	0.876937	0.983133
	0.770694	1
	0.747349	0.851612
	0.779491	0.711244
	0.675098	0.449317
	0.733904	0.364836
	0.68565	0.331519
	0.737623	0.346273
	0.768105	0.3473
	0.731328	0.294226
	0.730603	0.217847
	0.768663	0.181115
	0.780026	0.144394
	0.701336	0.208355
	0.681955	0.270456
	0.624446	0.368199
	0.499841	0.389291
	0.445877	0.800773
	0.423792	0.517313
	0.334237	0.218967
	0.239606	0.153672
	0.189203	0.0918947
	0.152377	0.0989553
	0.0810801	0.0227182
	0.0829123	0.0815985
	0.0759984	0.0308197
	0.101896	0.0862763
	0.079806	0.0916752
	0.000286432	0.104367
	0.0518245	0.106311
	0.0211812	0.0592942
	0.0242727	0.0149176
	0	0.0374539
	0.0448069	0.0535316
	0.146278	0.0435677
	0.24492	0
	0.331955	0.00363691
	0.32476	0.0548609
	0.27661	0.116682
	0.217091	0.119034
	0.185865	0.0271013
	0.200705	0.021834
	0.227818	0.0478066
	0.260718	0.0965851
	0.218099	0.13059
	0.168906	0.128358
	0.142545	0.109941
	0.0918065	0.0821127
	0.173153	0.0503148
	0.192409	0.11255
	0.208098	0.115403
	0.250431	0.0698036
	0.272876	0.0444644
	0.328523	0.0711894
	0.372663	0.0397615
	0.387681	0.023063
	0.58328	0.0880697
	0.693912	0.152104
	0.855638	0.266379
	0.921473	0.308943
	1	0.513607
	0.864483	0.593989
	0.739277	0.48823
	0.60173	0.388943
	0.523292	0.261343
	0.528586	0.178478
	0.518947	0.128458
	0.477182	0.146292
	0.527712	0.165185
	0.589261	0.183639
	0.573502	0.204206
	0.594229	0.21898
	0.54595	0.256835
	0.621726	0.216283
	0.532977	0.301136
	0.617346	0.259726
	0.660429	0.294797
	0.651145	0.340064
	0.648439	0.399101
	0.66958	0.457956
	0.589256	0.407622
	0.65914	0.413335
	0.726655	0.361145
	0.704792	0.255205
	0.768696	0.255995
	0.787166	0.323246
	0.745485	0.412463
	0.797685	0.372501
	0.722516	0.365673
	0.708965	0.396379
	0.698179	0.449961
	0.678662	0.546239
	0.743796	0.570249
	0.695606	0.72831
	0.608506	0.811414
	0.466564	0.931639
	0.454188	1
	0.419777	0.940982
	0.455803	0.803312
	0.475485	0.195942
	0.471205	0.145659
	0.383228	0.12016
	0.312088	0.0995961
	0.327224	0.171391
	0.266866	0.154772
	0.18372	0.0695798
	0.103956	0.105227
	0.0507011	0.135975
	0.0411539	0.113631
	0.0716368	0.0312541
	0.0104954	0.011704
	0.100675	0.0148091
	0.0708591	0.0136583
	0.0217384	0.0308994
	0.0147397	0.0417276
	0	0.00263466
	0.011544	0.0224019
	0.0289276	0.0438122
	0.0737439	0.0857569
	0.034652	0.0710853
	0.0264342	0.0187684
	0.112976	0.0473516
	0.225852	0.0675603
	0.317381	0
	0.431261	0.00785333
	0.401896	0.127774
	0.377424	0.05852
	0.30959	0.128548
	0.243993	0.163414
	0.205489	0.135092
	0.23255	0.115585
	0.27117	0.0661417
	0.28887	0.0786418
	0.354662	0.11835
	0.362804	0.224098
	0.406452	0.231221
	0.435741	0.383329
	0.462978	0.576803
	0.480201	0.651204
	0.524756	0.672838
	0.617981	0.597186
	0.607676	0.493051
	0.701237	0.555907
	0.6844	0.437861
	0.768398	0.374499
	0.714281	0.292491
	0.631772	0.131936
	0.665762	0.170052
	0.648007	0.136199
	0.584894	0.138515
	0.601013	0.18054
	0.631471	0.253369
	0.560467	0.26149
	0.563667	0.248853
	0.613119	0.263604
	0.606081	0.348159
	0.589073	0.454009
	0.623078	0.644972
	0.689853	0.828609
	0.725263	0.817108
	0.705085	0.952337
	0.684726	1
	0.858658	0.962109
	0.867392	0.92442
	0.910548	0.94617
	0.980645	0.81587
	1	0.673721
	0.949866	0.651573
	0.98658	0.616019
	0.990583	0.499378
	0.985842	0.435429
	0.960497	0.398869
	0.889818	0.320452
	0.787448	0.189385
	0.767922	0.14875
	0.72584	0.174235
	0.679543	0.143502
	0.698487	0.0754788
	0.597993	0.105886
	0.578312	0.270328
	0.472204	0.206597
	0.371205	0.230262
	0.374885	0.193035
	0.316717	0.204397
	0.278006	0.224964
	0.228909	0.139555
	0.237971	0.184234
	0.186587	0.214137
	0.129959	0.129503
	0.155186	0.163409
	0.100463	0.161145
	0.0582396	0.135469
	0.0599466	0.0684845
	0.0823804	0.0852964
	0.107706	0.0526272
	0.111872	0.0264695
	0.0927708	0.0470996
	0	0.057176
	0.0171508	0.0717768
	0.0386207	0.06584
	0.0358508	0.0899377
	0.0576631	0.065952
	0.0872176	0.050421
	0.14035	0.0440995
	0.186798	0.0295523
	0.24102	0.0316562
	0.260919	0.0199288
	0.276443	0
	0.29685	0.0479324
	0.314943	0.0667167
	0.306232	0.0802655
	0.300692	0.0329663
	0.273246	0.0200603
	0.282339	0.0425557
	0.305764	0.0407878
	0.367151	0.0523058
	0.382663	0.0190278
	0.388162	0.0811616
	0.394089	0.202863
	0.413717	0.197734
	0.459648	0.217025
	0.505947	0.281706
	0.587594	0.410109
	0.581419	0.326512
	0.659746	0.309656
	0.761295	0.324427
	0.70909	0.250449
	0.777049	0.257594
	0.794821	0.213416
	0.784251	0.236618
	0.764564	0.238045
	0.74708	0.171533
	0.742784	0.159411
	0.739901	0.173992
	0.696696	0.18139
	0.629944	0.21085
	0.682436	0.268581
	0.739536	0.278204
	0.676707	0.254131
	0.634321	0.270704
	0.637681	0.24703
	0.609203	0.227691
	0.704352	0.321009
	0.75412	0.364217
	0.788665	0.392332
	0.746761	0.460992
	0.851539	0.579679
	0.962253	0.660918
	1	0.701214
	0.939409	0.812137
	0.935491	0.902518
	0.89964	1
	0.90037	0.90544
	0.860096	0.801384
	0.852944	0.681222
	0.804559	0.497032
	0.734024	0.415602
	0.660399	0.348637
	0.605848	0.314302
	0.543766	0.237621
	0.488333	0.21365
	0.468714	0.209856
	0.369196	0.219528
	0.326537	0.324445
	0.239957	0.260242
	0.172754	0.179351
	0.262197	0.343592
	0.170839	0.212278
	0.108077	0.203661
	0.104573	0.17445
	0.0978584	0.2096
	0.0761905	0.208422
	0.109602	0.206977
	0.00854408	0.174729
	1.07002e-05	0.108984
	0.00742591	0.0211033
	0.0187039	0.0303949
	0	0.104715
	0.0563899	0.0441075
	0.0680745	0.00787048
	0.0133966	0.0563383
	0.037472	0.104417
	0.0848737	0.122503
	0.121308	0.0415994
	0.146105	0.0295386
	0.216823	0.0306013
	0.287101	0.0867878
	0.278129	0.131071
	0.318416	0.0501743
	0.322203	0
	0.336574	0.0571156
	0.284956	0.0860165
	0.278413	0.0935226
	0.238769	0.064646
	0.293468	0.0843769
	0.300771	0.0574982
	0.305436	0.127804
	0.293559	0.0836724
	0.355566	0.0131478
	0.300883	0.0363342
	0.417456	0.151822
	0.494845	0.175063
	0.455907	0.243675
	0.511147	0.320175
	0.558468	0.343155
	0.634573	0.505885
	0.699047	0.547107
	0.684832	0.50665
	0.706361	0.493818
	0.688096	0.434018
	0.656781	0.395935
	0.641962	0.424702
	0.62848	0.430362
	0.654181	0.400702
	0.71781	0.434407
	0.661238	0.418532
	0.711524	0.40117
	0.715258	0.433526
	0.727301	0.486184
	0.739718	0.504913
	0.774852	0.43417
	0.6926	0.514988
	0.738418	0.563322
	0.80713	0.54313
	0.77161	0.575608
	0.716044	0.748436
	0.825732	0.753452
	1	0.836906
	0.889553	0.857572
	0.971463	1
	0.972249	0.852957
	0.926206	0.799934
	0.890462	0.800378
	0.883834	0.882666
	0.855505	0.953439
	0.766774	0.95333
	0.822565	0.815287
	0.744512	0.679248
	0.602494	0.511381
	0.561646	0.452097
	0.545329	0.364174
	0.444292	0.284151
	0.429917	0.279372
	0.434914	0.206509
	0.328249	0.323783
	0.390268	0.478682
	0.3928	0.288917
	0.27339	0.242154
	0.164921	0.24342
	0.228062	0.167264
	0.148518	0.215256
	0.111931	0.171018
	0.0568662	0.145027
	0.00762911	0.111035
	0	0.171582
	0.0433069	0.184753
	0.0655007	0.16361
	0.0172367	0.153128
	0.00803772	0.184224
	0.0645007	0.165698
	0.0739847	0.233202
	0.044436	0.0604117
	0.0428929	0.0731604
	0.109722	0.140107
	0.0991892	0.0482993
	0.0517963	0.0513453
	0.176647	0.0543698
	0.13976	0.149088
	0.13477	0.057809
	0.117259	0.121531
	0.257137	0.118442
	0.244105	0.046283
	0.261014	0.0692779
	0.275546	0.0665108
	0.248019	0.0224587
	0.181475	0
	0.229804	0.0309387
	0.220217	0.0711441
	0.31539	0.0648305
	0.318831	0.0689132
	0.358117	0.0654597
	0.413461	0.0865813
	0.509312	0.142617
	0.564549	0.221219
	0.639518	0.240617
	0.743594	0.180499
	0.766051	0.187227
	0.797455	0.237779
	0.795605	0.305433
	0.714164	0.339962
	0.653362	0.357844
	0.612275	0.379909
	0.6407	0.380725
	0.634093	0.340626
	0.613453	0.347719
	0.65505	0.415996
	0.69811	0.55782
	0.672238	0.614721
	0.712798	0.785452
	0.694185	0.986672
	0.745035	1
	0.742917	0.891082
	0.745234	0.878905
	0.789019	0.809255
	0.842692	0.731898
	0.917961	0.666795
	0.997435	0.707115
	1	0.80593
	0.976086	0.794705
	0.928031	0.827552
	0.851687	0.798151
	0.822934	0.750888
	0.827805	0.618346
	0.80753	0.653503
	0.765449	0.566772
	0.660432	0.503936
	0.693561	0.505166
	0.638604	0.4685
	0.52364	0.600428
	0.536366	0.695589
	0.479048	0.814017
	0.423193	0.795677
	0.37516	0.698707
	0.403488	0.491881
	0.398265	0.304858
	0.323554	0.159604
	0.318802	0.192258
	0.268613	0.269118
	0.137081	0.269542
	0.157798	0.141795
	0.161857	0.18674
	0.0913043	0.153577
	0.0577732	0.0912248
	0.0349372	0.118139
	0.0300259	0.144428
	0.00535002	0.114135
	0.0712904	0.0261678
	0.0057489	0.0711631
	0.0182339	0.0870345
	0.00290187	0.0642319
	0.0531911	0.0604219
	0	0.00802899
	0.0651027	0
	0.0666484	0.0111861
	0.170313	0.0189998
	0.178211	0.0592236
	0.167506	0.0923369
	0.277573	0.14003
	0.312949	0.124008
	0.282843	0.284373
	0.333152	0.408639
	0.314086	0.591024
	0.367805	0.75438
	0.353635	0.941587
	0.411493	1
	0.435531	0.803322
	0.417102	0.518038
	0.445398	0.356031
	0.636483	0.334448
	0.702513	0.244055
	0.796116	0.219674
	0.844266	0.210705
	0.795577	0.310031
	0.738014	0.408546
	0.746929	0.453864
	0.809429	0.445785
	0.856098	0.347937
	0.837849	0.278812
	0.901022	0.188843
	0.883157	0.184688
	0.971729	0.13894
	0.949257	0.127438
	0.867217	0.156676
	0.872332	0.1745
	0.772716	0.208323
	0.692032	0.194927
	0.704632	0.189201
	0.725858	0.22733
	0.791718	0.224252
	0.836024	0.196829
	0.805634	0.245017
	0.827388	0.254043
	0.846285	0.323097
	0.821495	0.293004
	0.871779	0.257746
	0.884658	0.343237
	0.88759	0.373323
	0.988123	0.36566
	1	0.341035
	0.89834	0.431922
	0.95709	0.466736
	0.932993	0.463335
	0.868164	0.43914
	0.900075	0.538595
	0.744401	0.586834
	0.701596	0.560092
	0.66787	0.540647
	0.622278	0.520908
	0.550733	0.47041
	0.446614	0.443474
	0.422821	0.429971
	0.401695	0.322264
	0.391514	0.294891
	0.380515	0.426412
	0.330512	0.355735
	0.332317	0.303287
	0.322645	0.3075
	0.279255	0.285655
	0.217642	0.181002
	0.151803	0.14387
	0.119085	0.23287
	0.114638	0.230669
	0.101782	0.258298
	0.110168	0.178586
	0.0329401	0.167296
	0.00349393	0.185426
	0	0.0970669
	0.043695	0
	0.0485818	0.0277113
	0.0602715	0.0539353
	0.0665698	0.0806181
	0.100727	0.126934
	0.223422	0.0192519
	0.221293	0.0670942
	0.324292	0.0328311
	0.305333	0.0355127
	0.325371	0.0975202
	0.277071	0.0756752
	0.291903	0.119852
	0.309497	0.155376
	0.269898	0.189749
	0.324352	0.225262
	0.384305	0.351174
	0.413394	0.305449
	0.526987	0.341083
	0.587563	0.396605
	0.641041	0.309761
	0.731606	0.31304
	0.764532	0.331468
	0.757151	0.347364
	0.704862	0.402836
	0.719366	0.485086
	0.748358	0.486175
	0.741583	0.452868
	0.767526	0.463948
	0.818889	0.431731
	0.913457	0.410295
	0.963011	0.404053
	0.964862	0.369911
	0.93175	0.331833
	0.959827	0.314129
	0.983974	0.303508
	0.967162	0.268559
	1	0.356736
	0.930501	0.351041
	0.873811	0.353363
	0.814016	0.402488
	0.757642	0.3342
	0.726025	0.395461
	0.715432	0.423255
	0.700855	0.435015
	0.715321	0.453139
	0.780803	0.463849
	0.772825	0.502065
	0.768165	0.543273
	0.824346	0.587245
	0.830561	0.631084
	0.825461	0.569264
	0.774884	0.561668
	0.840654	0.633566
	0.861372	0.654322
	0.8264	0.694125
	0.77942	0.811771
	0.786903	0.814552
	0.714321	0.907887
	0.653009	1
	0.629384	0.985254
	0.537043	0.938977
	0.568456	0.711332
	0.440689	0.492124
	0.437968	0.477544
	0.37597	0.420065
	0.311425	0.545936
	0.255798	0.43913
	0.22982	0.422227
	0.231347	0.452588
	0.143593	0.354656
	0.0971449	0.292176
	0.107177	0.213549
	0.0672327	0.308148
	0.0773398	0.228339
	0.0269025	0.210278
	0	0.173507
	0.00696759	0.211854
	0.00394213	0.190792
	0.0296408	0.157148
	0.0293811	0.176715
	0.0446579	0.157529
	0.0984393	0.163558
	0.118248	0.066745
	0.147232	0.0422746
	0.128509	0.09463
	0.206789	0.0716729
	0.14879	0.126774
[truncated: 4,669 more rows]
