# Supplementary material for: A novel live-cell imaging assay reveals regulation of endosome maturation
Source: eLife. 2021 Nov 30;10:e70982. doi: 10.7554/eLife.70982 (PMC8635980; doi:10.7554/eLife.70982)
Supplement: Figure 6—source data 1. [file elife-70982-fig6-data1.xlsx]

## Sheet: exp1-endosome1
endosome 1								dMFI					%dMFI
	frame #	Rab5(rim)	Rab5(background)	Snx1(rim)	Snx1(background)		frame #	Rab5	Snx1			frame #	Rab5	Snx1
	93	348.634	350.369	195.339	195.905		93	-1.735	-0.566			93	0.0213435	0.0164049
	94	341.216	344.349	191.75	192.715		94	-3.133	-0.965			94	0	0
	95	354.767	357.116	192.922	192.308		95	-2.349	0.614			95	0.0119695	0.0649206
	96	368.403	369.21	205.5	199		96	-0.807	6.5			96	0.0355115	0.306924
	97	442.259	383.39	211.926	199.274		97	58.869	12.652			97	0.946595	0.559863
	98	445.315	399.238	240.278	216.921		98	46.077	23.357			98	0.751298	1
	99	429.361	372	235.296	213.47		99	57.361	21.826			99	0.923573	0.937053
	100	435.019	372.652	234.667	212.463		100	62.367	22.204			100	1	0.952594
	101	423.278	371.841	221.667	206.305		101	51.437	15.362			101	0.83313	0.671285
	102	423.452	387.455	225	220.167		102	35.997	4.833			102	0.597405	0.238385
	103	399.604	357.099	227.062	218.454		103	42.505	8.608			103	0.696763	0.393594
	104	373.698	341.25	221.177	212.73		104	32.448	8.447			104	0.543221	0.386975
	105	383.51	336.382	205.667	199.401		105	47.128	6.266			105	0.767344	0.297303
	106	365.62	334.046	209.3	206.474		106	31.574	2.826			106	0.529878	0.155867
	107	352.979	324.474	208.938	206.678		107	28.505	2.26			107	0.483023	0.132596
	108	363.052	339.447	211.312	206.776		108	23.605	4.536			108	0.408214	0.226174
	109	357.656	337.467	209.594	197.599		109	20.189	11.995			109	0.356061	0.532851
	110	346.375	331.967	207.031	203.5		110	14.408	3.531			110	0.267802	0.184853

## Sheet: exp1-endosome2
endosome 2								dMFI					%dMFI
	frame #	Rab5(rim)	Rab5(background)	Snx1(rim)	Snx1(background)		frame #	Rab5	Snx1			frame #	Rab5	Snx1
	59	354.54	359.5	200.81	208.513		59	-4.96	-7.703			59	0.225484	0.11738
	60	349.062	364.711	206.354	210.039		60	-15.649	-3.685			60	0.131709	0.224108
	61	358.5	363.507	197.844	209.197		61	-5.007	-11.353			61	0.225072	0.0204266
	62	376.361	378.707	205.315	209.701		62	-2.346	-4.386			62	0.248416	0.205488
	63	359.009	358.274	196.546	201.098		63	0.735	-4.552			63	0.275446	0.201078
	64	354.815	355.378	203.361	202.537		64	-0.563	0.824			64	0.264059	0.343879
	65	352.917	374.927	207.398	206.579		65	-22.01	0.819			65	0.0759041	0.343746
	66	352.194	360.793	194.509	199.78		66	-8.599	-5.271			66	0.193559	0.18198
	67	365.778	368.177	192.815	202.512		67	-2.399	-9.697			67	0.247952	0.0644142
	68	354.87	368.988	193.157	199.677		68	-14.118	-6.52			68	0.145141	0.148803
	69	370.586	387.802	198.155	208.169		69	-17.216	-10.014			69	0.117962	0.0559938
	70	381.629	402.472	209.048	213.273		70	-20.843	-4.225			70	0.0861422	0.209764
	71	373.919	390.182	208.573	219.114		71	-16.263	-10.541			71	0.126323	0.0419954
	72	370.815	384.682	208.548	215.511		72	-13.867	-6.963			72	0.147343	0.137036
	73	373.992	387.557	211.185	217.932		73	-13.565	-6.747			73	0.149992	0.142774
	74	381.387	389.665	209.315	219.176		74	-8.278	-9.861			74	0.196375	0.0600579
	75	374.089	382.705	206.177	211.602		75	-8.616	-5.425			75	0.19341	0.177889
	76	362.25	377.625	197.565	203.665		76	-15.375	-6.1			76	0.134113	0.15996
	77	369.226	397.074	206.75	218		77	-27.848	-11.25			77	0.0246872	0.0231625
	78	384.152	399.489	210.523	215.359		78	-15.337	-4.836			78	0.134446	0.193535
	79	372.323	400.21	196.403	207.29		79	-27.887	-10.887			79	0.0243451	0.0328047
	80	358.828	376.033	201.672	209.233		80	-17.205	-7.561			80	0.118058	0.121152
	81	374.902	379.859	203.356	210.071		81	-4.957	-6.715			81	0.22551	0.143624
	82	363.803	377.658	204.712	210.685		82	-13.855	-5.973			82	0.147448	0.163333
	83	362.152	378.136	204.894	213.739		83	-15.984	-8.845			83	0.12877	0.0870454
	84	360.856	379.995	193.402	200.196		84	-19.139	-6.794			84	0.101091	0.141525
	85	374.926	383.833	201.434	204.411		85	-8.907	-2.977			85	0.190857	0.242914
	86	390.64	403.26	204.603	204.583		86	-12.62	0.02			86	0.158283	0.322522
	87	399.11	410.135	201.25	207.271		87	-11.025	-6.021			87	0.172276	0.162058
	88	390.871	407.457	204.644	216.766		88	-16.586	-12.122			88	0.123489	0
	89	371.758	398.033	208.803	218.147		89	-26.275	-9.344			89	0.0384872	0.0737907
	90	390.492	408.217	205.78	216.418		90	-17.725	-10.638			90	0.113496	0.0394188
	91	398.386	414.571	213.712	208.609		91	-16.185	5.103			91	0.127007	0.45754
	92	385.167	403.641	202.273	206.967		92	-18.474	-4.694			92	0.106925	0.197307
	93	399.273	420.158	202.235	203		93	-20.885	-0.765			93	0.0857737	0.301671
	94	386.477	407.163	200.962	206.179		94	-20.686	-5.217			94	0.0875195	0.183414
	95	388.447	419.109	202.932	207.217		95	-30.662	-4.285			95	0	0.208171
	96	374.636	397.989	202.462	210.989		96	-23.353	-8.527			96	0.0641219	0.0954923
	97	394.068	419.549	201.947	207.163		97	-25.481	-5.216			97	0.045453	0.183441
	98	413.853	419.839	207	209.422		98	-5.986	-2.422			98	0.216483	0.257657
	99	395.478	414.208	201.471	210.729		99	-18.73	-9.258			99	0.10468	0.0760751
	100	429.794	449.234	205.375	200.896		100	-19.44	4.479			100	0.0984507	0.440965
	101	460.068	438.234	208.705	202.571		101	21.834	6.134			101	0.460548	0.484926
	102	537.081	457.295	226.024	222.335		102	79.786	3.689			102	0.968961	0.41998
	103	537.856	454.532	254.879	239.399		103	83.324	15.48			103	1	0.733179
	104	488.515	435.761	238.568	213.043		104	52.754	25.525			104	0.731809	1
	105	491.098	438.337	243.871	219.848		105	52.761	24.023			105	0.731871	0.960103
	106	491.023	447.755	218.015	207.022		106	43.268	10.993			106	0.648588	0.613993
	107	484.545	449.163	223.697	217.592		107	35.382	6.105			107	0.579404	0.484155
	108	523.056	456.602	230.597	231.739		108	66.454	-1.142			108	0.851999	0.291657
	109	498.561	437.527	209.689	204.739		109	61.034	4.95			109	0.80445	0.453476
	110	460.394	418.082	213.326	212.902		110	42.312	0.424			110	0.640201	0.333254
	111	489.083	433.288	200.121	205.332		111	55.795	-5.211			111	0.758488	0.183574
	112	472.182	437.745	202.985	195.016		112	34.437	7.969			112	0.571114	0.533668
	113	508.205	458.25	206.045	195.152		113	49.955	10.893			113	0.707254	0.611337
	114	482.824	449.719	201.338	193.115		114	33.105	8.223			114	0.559428	0.540415
	115	429.926	420.057	203.25	190.359		115	9.869	12.891			115	0.355579	0.664409
	116	423.257	423.703	207.191	190.677		116	-0.446	16.514			116	0.265085	0.760645
	117	426.015	431.427	210.353	191.385		117	-5.412	18.968			117	0.221518	0.825829
	118	424.159	435.353	200.008	192.908		118	-11.194	7.1			118	0.170793	0.510585
	119	439.682	453.315	196.22	193.875		119	-13.633	2.345			119	0.149396	0.38428
	120	439.689	451.978	200.508	194.788		120	-12.289	5.72			120	0.161186	0.473929
	121	411.053	427.13	190.932	188.141		121	-16.077	2.791			121	0.127954	0.396127
	122	434.203	442.194	192.445	192.533		122	-7.991	-0.088			122	0.198893	0.319654
	123	432.289	457.267	192.086	191.511		123	-24.978	0.575			123	0.0498658	0.337265
	124	398.516	420.659	189.129	188.858		124	-22.143	0.271			124	0.0747372	0.32919
	125	392.218	407.67	185.258	185.165		125	-15.452	0.093			125	0.133437	0.324461
	126	399.282	414.528	187.718	184.886		126	-15.246	2.832			126	0.135245	0.397216
	127	393.888	411.82	185.086	185.169		127	-17.932	-0.083			127	0.11168	0.319786
	128	386.603	409.238	188.009	188.424		128	-22.635	-0.415			128	0.0704209	0.310968
	129	411.298	431.909	188.323	187.364		129	-20.611	0.959			129	0.0881775	0.347465
	130	429.672	452.227	196.448	198.547		130	-22.555	-2.099			130	0.0711228	0.266236
	131	414.155	423.076	188.871	189.866		131	-8.921	-0.995			131	0.190734	0.295561
	132	427.759	438.11	196.422	195.308		132	-10.351	1.114			132	0.178189	0.351582

## Sheet: exp1-endosome3
endosome 3								dMFI					%dMFI
	frame #	Rab5(rim)	Rab5(background)	Snx1(rim)	Snx1(background)		frame #	Rab5	Snx1			frame #	Rab5	Snx1
	60	420.307	415.319	209.023	206.403		60	4.988	2.62			60	0.17336	0.282731
	61	406.239	411.653	203.352	204.438		61	-5.414	-1.086			61	0.08989	0.21861
	62	410.477	419.521	197.227	201.271		62	-9.044	-4.044			62	0.0607612	0.167431
	63	404.773	409.583	200	200.694		63	-4.81	-0.694			63	0.0947368	0.225392
	64	407.656	419.368	201.865	203.763		64	-11.712	-1.898			64	0.0393519	0.204561
	65	419.104	428.053	203.073	204.678		65	-8.949	-1.605			65	0.0615235	0.20963
	66	416.302	427.276	198.25	202.428		66	-10.974	-4.178			66	0.045274	0.165112
	67	408.812	425.428	200.917	205.842		67	-16.616	-4.925			67	0	0.152188
	68	433.029	437.442	204.625	211.731		68	-4.413	-7.106			68	0.0979225	0.114452
	69	440.385	440.929	216.865	222.276		69	-0.544	-5.411			69	0.128969	0.143779
	70	437.163	446.205	221.048	234.769		70	-9.042	-13.721			70	0.0607772	0
	71	438.673	436.744	212.952	220.256		71	1.929	-7.304			71	0.148814	0.111027
	72	432.933	440.981	211.933	216.006		72	-8.048	-4.073			72	0.0687536	0.166929
	73	446.74	450.429	209.327	213.378		73	-3.689	-4.051			73	0.103732	0.16731
	74	437.01	437.75	216.308	222.423		74	-0.74	-6.115			74	0.127396	0.131599
	75	429.538	439.878	213.462	218.5		75	-10.34	-5.038			75	0.0503615	0.150233
	76	438.827	429	205.077	209.09		76	9.827	-4.013			76	0.212191	0.167967
	77	427.615	426.859	203.029	208.058		77	0.756	-5.029			77	0.139401	0.150388
	78	428.663	427.487	215.413	219.308		78	1.176	-3.895			78	0.142771	0.170009
	79	413.01	413.994	213.548	217.026		79	-0.984	-3.478			79	0.125438	0.177224
	80	415.471	426.071	208.298	214.026		80	-10.6	-5.728			80	0.0482751	0.138294
	81	404.76	417.673	200.606	204.212		81	-12.913	-3.606			81	0.0297146	0.175009
	82	422.817	423.936	213.269	214.641		82	-1.119	-1.372			82	0.124355	0.213662
	83	436.337	438.321	205.663	212.962		83	-1.984	-7.299			83	0.117414	0.111113
	84	430.712	436.186	208.135	219.128		84	-5.474	-10.993			84	0.0894085	0.0471997
	85	433.702	434.083	205.692	208.058		85	-0.381	-2.366			85	0.130277	0.196463
	86	439.163	439.692	210.548	210.442		86	-0.529	0.106			86	0.129089	0.239234
	87	428.729	439.053	224.521	221.612		87	-10.324	2.909			87	0.0504899	0.287731
	88	450.354	436.026	214.281	214.52		88	14.328	-0.239			88	0.248309	0.233265
	89	443.865	431.237	217.76	218.914		89	12.628	-1.154			89	0.234667	0.217433
	90	554.865	446.862	270.365	226.289		90	108.003	44.076			90	1	1
	91	515.083	431.678	263.969	224.342		91	83.405	39.627			91	0.802614	0.923024
	92	498.787	419.387	227.472	230.95		92	79.4	-3.478			92	0.770476	0.177224
	93	468.33	410.369	243.241	216.22		93	57.961	27.021			93	0.59844	0.704915
	94	466.88	418.433	235.083	211.713		94	48.447	23.37			94	0.522095	0.641746
	95	481.38	424.238	238.833	217.098		95	57.142	21.735			95	0.591868	0.613457
	96	470.111	421.262	223.315	214.146		96	48.849	9.169			96	0.525321	0.396041
	97	473.583	418.152	227.315	220.159		97	55.431	7.156			97	0.578138	0.361213
	98	480.083	415.652	225.593	208.341		98	64.431	17.252			98	0.650358	0.535893
	99	460.24	417.205	224.798	207.128		99	43.035	17.67			99	0.478667	0.543125
	100	493.058	448.667	230.346	228.455		100	44.391	1.891			100	0.489548	0.270118
	101	479.5	423.482	246.704	220.439		101	56.018	26.265			101	0.582849	0.691835
	102	482.548	455.013	231.019	231.673		102	27.535	-0.654			102	0.354288	0.226084
	103	466.471	460.571	226.192	230.872		103	5.9	-4.68			103	0.180679	0.156427
	104	442.64	433.461	227.55	217.967		104	9.179	9.583			104	0.206991	0.403204
	105	450.12	465.974	218.05	216.151		105	-15.854	1.899			105	0.00611464	0.270256
	106	444.44	446.553	222.65	224.888		106	-2.113	-2.238			106	0.116379	0.198678
	107	429.396	438.678	221.417	215.618		107	-9.282	5.799			107	0.0588514	0.337734
	108	423.856	434.487	209.75	203.244		108	-10.631	6.506			108	0.0480264	0.349966
	109	435.221	445.34	206.288	201.801		109	-10.119	4.487			109	0.0521349	0.315034
	110	422.942	429.686	203.788	201.833		110	-6.744	1.955			110	0.0792175	0.271225
	111	430.51	429.891	212.163	210.853		111	0.619	1.31			111	0.138302	0.260065

## Sheet: exp1-endosome4
endosome 4								dMFI					%dMFI
	frame #	Rab5(rim)	Rab5(background)	Snx1(rim)	Snx1(background)		frame #	Rab5	Snx1			frame #	Rab5	Snx1
	60	521.222	505.037	379.907	383.128		60	16.185	-3.221			60	0.272809	0.129054
	61	513.204	498.39	376.093	377.799		61	14.814	-1.706			61	0.260804	0.147086
	62	532.058	515.564	375.981	390.045		62	16.494	-14.064			62	0.275515	0
	63	510.444	496.113	370.926	382.8		63	14.331	-11.874			63	0.256574	0.0260655
	64	497.702	478.974	355.99	362.096		64	18.728	-6.106			64	0.295078	0.0947167
	65	489.183	477.16	366.644	361.077		65	12.023	5.567			65	0.236363	0.23365
	66	488.531	477.737	347.396	360.072		66	10.794	-12.676			66	0.225601	0.0165201
	67	491.827	478.526	355.5	356.045		67	13.301	-0.545			67	0.247555	0.160904
	68	474.038	461.462	348.654	349.731		68	12.576	-1.077			68	0.241206	0.154572
	69	513.327	487.821	362.317	353.077		69	25.506	9.24			69	0.354431	0.277366
	70	500.625	483.564	365.856	357.25		70	17.061	8.606			70	0.28048	0.26982
	71	501.5	474.205	372.933	351.635		71	27.295	21.298			71	0.370097	0.420881
	72	489.106	491.346	356.615	359.353		72	-2.24	-2.738			72	0.111465	0.134803
	73	502.125	487.244	361.625	357.75		73	14.881	3.875			73	0.26139	0.213511
	74	491.417	488.309	355.125	353.77		74	3.108	1.355			74	0.158297	0.183518
	75	520.781	510.664	371.656	362.296		75	10.117	9.36			75	0.219673	0.278794
	76	496.552	481.487	341.885	337.276		76	15.065	4.609			76	0.263002	0.222247
	77	475.604	479.645	337	338.342		77	-4.041	-1.342			77	0.0956943	0.151418
	78	515.394	490.327	342.673	341.545		78	25.067	1.128			78	0.350587	0.180816
	79	505.654	485.974	340.731	336.455		79	19.68	4.276			79	0.303414	0.218284
	80	501.913	491.814	342.817	337.545		80	10.099	5.272			80	0.219515	0.230138
	81	489.856	468.269	332.452	334.571		81	21.587	-2.119			81	0.320113	0.14217
	82	493.843	461.012	345.343	335.444		82	32.831	9.899			82	0.418575	0.285209
	83	477.298	460.115	336.625	328.154		83	17.183	8.471			83	0.281549	0.268213
	84	478.63	462	338.685	328.299		84	16.63	10.386			84	0.276706	0.291006
	85	506.05	492.625	337.11	336.849		85	13.425	0.261			85	0.248641	0.170497
	86	473.93	470.059	333.66	345.572		86	3.871	-11.912			86	0.164978	0.0256133
	87	471.278	470.451	333.435	332.061		87	0.827	1.374			87	0.138322	0.183744
	88	455.333	457.744	318.222	322.122		88	-2.411	-3.9			88	0.109968	0.120973
	89	596.76	497.532	388.567	350.378		89	99.228	38.189			89	1	0.621919
	90	538.648	464.427	443.028	373.073		90	74.221	69.955			90	0.781019	1
	91	531.962	477.25	410.279	372.147		91	54.712	38.132			91	0.610182	0.62124
	92	529.278	463.768	387.593	339.152		92	65.51	48.441			92	0.704738	0.743939
	93	538.037	466.073	382.593	337.585		93	71.964	45.008			93	0.761255	0.703079
	94	487.046	452.844	354.583	323.169		94	34.202	31.414			94	0.43058	0.541282
	95	483.111	443.768	349.472	329.201		95	39.343	20.271			95	0.475599	0.408658
	96	465.852	446.409	357.019	330.841		96	19.443	26.178			96	0.301339	0.478963
	97	459.704	451.622	355.778	331.567		97	8.082	24.211			97	0.201853	0.455552
	98	459.944	453.616	332.407	316.226		98	6.328	16.181			98	0.186494	0.359978
	99	470.667	479.817	326.278	325.482		99	-9.15	0.796			99	0.0509558	0.176865
	100	474.204	480.762	334.731	325.945		100	-6.558	8.786			100	0.0736534	0.271962
	101	484.448	477.628	338.621	330.645		101	6.82	7.976			101	0.190802	0.262322
	102	471.75	467.052	336.319	341.128		102	4.698	-4.809			102	0.17222	0.110154
	103	460.853	465.89	332.069	325.058		103	-5.037	7.011			103	0.0869725	0.250836
	104	444.464	449.619	317.098	318.256		104	-5.155	-1.158			104	0.0859392	0.153608
	105	435.923	435.724	297.317	304.577		105	0.199	-7.26			105	0.132823	0.0809817
	106	440.438	445.292	299.545	291.339		106	-4.854	8.206			106	0.088575	0.265059
	107	440.157	439.106	297.685	293.562		107	1.051	4.123			107	0.140284	0.216463
	108	410.306	422.512	282.731	285.677		108	-12.206	-2.946			108	0.024195	0.132327
	109	412.954	422.427	281.704	287.287		109	-9.473	-5.583			109	0.0481274	0.100941
	110	419.602	421.915	283.472	282.921		110	-2.313	0.551			110	0.110826	0.173949
	111	412.25	427.219	282.352	289.55		111	-14.969	-7.198			111	0	0.0817196
	112	428.371	431.407	284.629	284.052		112	-3.036	0.577			112	0.104495	0.174258
	113	435.167	424.323	283.648	286.848		113	10.844	-3.2			113	0.226039	0.129304
	114	436.639	438.415	277.463	286.091		114	-1.776	-8.628			114	0.115528	0.0646997
	115	451.185	439.994	292.444	281.744		115	11.191	10.7			115	0.229078	0.294743

## Sheet: exp1-endosome5
endosome 5								dMFI					%dMFI
	frame #	Rab5(rim)	Rab5(background)	Snx1(rim)	Snx1(background)		frame #	Rab5	Snx1			frame #	Rab5	Snx1
	3	526.481	519.788	423.173	407.853		3	6.693	15.32			3	0.158475	0.221986
	4	514.606	514.282	417.481	406.962		4	0.324	10.519			4	0.0982672	0.1762
	5	513.125	502.128	400.673	393.795		5	10.997	6.878			5	0.199162	0.141477
	6	509.894	507.827	394.923	389.878		6	2.067	5.045			6	0.114744	0.123996
	7	511.808	506.314	397.817	386.808		7	5.494	11.009			7	0.147141	0.180873
	8	521.837	514.455	391.442	385.962		8	7.382	5.48			8	0.164989	0.128145
	9	535.509	520.713	393.12	384.311		9	14.796	8.809			9	0.235076	0.159892
	10	536.157	517.628	397.148	386.909		10	18.529	10.239			10	0.270365	0.17353
	11	563.327	539.218	421.327	407.526		11	24.109	13.801			11	0.323114	0.2075
	12	555.74	525.321	410.385	392.782		12	30.419	17.603			12	0.382765	0.243758
	13	545.12	520.744	421.972	405.543		13	24.376	16.429			13	0.325638	0.232562
	14	544.51	531.571	407.529	395.333		14	12.939	12.196			14	0.217521	0.192193
	15	543.75	540.945	415.111	403.476		15	2.805	11.635			15	0.121721	0.186843
	16	576.574	537.598	455.889	424.829		16	38.976	31.06			16	0.463657	0.372094
	17	568.852	545.707	429.426	418.866		17	23.145	10.56			17	0.314001	0.176591
	18	572.324	550.28	432.361	414.86		18	22.044	17.501			18	0.303593	0.242785
	19	552.889	550.1	428.056	408.075		19	2.789	19.981			19	0.12157	0.266437
	20	579.935	551.872	454.093	434.921		20	28.063	19.172			20	0.360493	0.258721
	21	591.423	567.84	441.769	429.109		21	23.583	12.66			21	0.318142	0.196618
	22	594.352	560.195	448.926	424.494		22	34.157	24.432			22	0.418101	0.308884
	23	574.685	547	464.861	415.098		23	27.685	49.763			23	0.356919	0.550459
	24	576.546	529.738	429.444	403.293		24	46.808	26.151			24	0.537695	0.325278
	25	562.704	516.5	421.935	390.244		25	46.204	31.691			25	0.531985	0.378111
	26	549.102	530.415	412.759	386.854		26	18.687	25.905			26	0.271858	0.322932
	27	570.287	540.128	417.935	395.22		27	30.159	22.715			27	0.380307	0.29251
	28	562.268	547.798	426.696	401.321		28	14.47	25.375			28	0.231994	0.317878
	29	584.343	569.39	430.639	406.902		29	14.953	23.737			29	0.23656	0.302256
	30	561.259	551.237	422.028	398.319		30	10.022	23.709			30	0.189945	0.301989
	31	567.926	552.39	413.222	396.665		31	15.536	16.557			31	0.242071	0.233783
	32	608.028	594.656	438.361	415.969		32	13.372	22.392			32	0.221614	0.28943
	33	578.269	561.457	426.917	402.622		33	16.812	24.295			33	0.254133	0.307578
	34	589.454	583.189	412.333	402.567		34	6.265	9.766			34	0.154429	0.169019
	35	602.644	569.564	430.913	404.551		35	33.08	26.362			35	0.40792	0.32729
	36	570.769	555.933	410.065	393.933		36	14.836	16.132			36	0.235454	0.22973
	37	589.843	565.331	468.435	420.113		37	24.512	48.322			37	0.326924	0.536716
	38	599.135	583.301	470.077	427.16		38	15.834	42.917			38	0.244888	0.48517
	39	584.019	578.878	444.096	408.282		39	5.141	35.814			39	0.143804	0.417431
	40	598.241	581.128	419.361	396.335		40	17.113	23.026			40	0.256979	0.295476
	41	613.796	580.366	417.472	400.665		41	33.43	16.807			41	0.411229	0.236167
	42	606.824	609.854	463.065	445.25		42	-3.03	17.815			42	0.0665608	0.24578
	43	607.509	608.894	503	465.144		43	-1.385	37.856			43	0.0821115	0.436905
	44	607.037	593.469	432.37	421.688		44	13.568	10.682			44	0.223467	0.177755
	45	598.052	599.336	426.042	410.421		45	-1.284	15.621			45	0.0830663	0.224856
	46	605.683	591.423	415.837	401.135		46	14.26	14.702			46	0.230009	0.216092
	47	628.426	587.775	417.593	425.55		47	40.651	-7.957			47	0.479491	0
	48	602.357	576.637	396.009	394.244		48	25.72	1.765			48	0.338344	0.0927159
	49	596.115	579.179	397.058	393.891		49	16.936	3.167			49	0.255306	0.106086
	50	586.482	537.565	400.464	386.488		50	48.917	13.976			50	0.557632	0.209169
	51	565.815	537.104	415	390.72		51	28.711	24.28			51	0.366618	0.307435
	52	587.333	540.744	424.991	400.756		52	46.589	24.235			52	0.535625	0.307006
	53	607.962	548.019	506.606	409.705		53	59.943	96.901			53	0.661864	1
	54	582.298	544.647	438.163	411.244		54	37.651	26.919			54	0.451131	0.332602
	55	575.083	529.598	416.093	373.945		55	45.485	42.148			55	0.525188	0.477837
	56	557.833	534.677	387.565	365.854		56	23.156	21.711			56	0.314105	0.282935
	57	547.759	524.451	370.435	359.146		57	23.308	11.289			57	0.315542	0.183543
	58	573.25	504.921	468.37	373.354		58	68.329	95.016			58	0.74114	0.982023
	59	583.389	503.616	431.815	367.89		59	79.773	63.925			59	0.849324	0.685518
	60	598.352	502.64	402.75	355.323		60	95.712	47.427			60	1	0.528181
	61	564.426	492.067	434.352	374.189		61	72.359	60.163			61	0.779237	0.64964
	62	579.361	499.518	413.787	366.604		62	79.843	47.183			62	0.849985	0.525854
	63	586.259	498.769	416.028	365.188		63	87.49	50.84			63	0.922275	0.56073
	64	587.065	499.22	426.741	363.024		64	87.845	63.717			64	0.925631	0.683534
	65	581.296	510.061	421.009	372.36		65	71.235	48.649			65	0.768611	0.539835
	66	578.241	503.5	414.074	360.494		66	74.741	53.58			66	0.801755	0.58686
	67	601.25	514.787	420.509	374.049		67	86.463	46.46			67	0.912566	0.518959
	68	584.093	510.195	416.611	364.372		68	73.898	52.239			68	0.793785	0.574072
	69	584.796	508.305	431.583	372.902		69	76.491	58.681			69	0.818298	0.635507
	70	587.056	515.902	406.787	370.335		70	71.154	36.452			70	0.767845	0.423516
	71	595.963	524.049	411.13	373.195		71	71.914	37.935			71	0.77503	0.437659
	72	615.694	535.939	410.352	375.317		72	79.755	35.035			72	0.849153	0.410002
	73	622.241	542.689	400.87	373.878		73	79.552	26.992			73	0.847234	0.333298
	74	594.759	564.549	416.843	387.744		74	30.21	29.099			74	0.380789	0.353392
	75	578.204	560.665	402.657	377.018		75	17.539	25.639			75	0.261006	0.320395
	76	559.806	538.427	386.037	358.933		76	21.379	27.104			76	0.297307	0.334366
	77	555.75	535.012	383.546	369.091		77	20.738	14.455			77	0.291247	0.213737
	78	543.204	537.896	379.287	371.799		78	5.308	7.488			78	0.145383	0.147294
	79	547.722	530.628	379.222	363.945		79	17.094	15.277			79	0.256799	0.221576
	80	541.444	530.805	383.204	367.866		80	10.639	15.338			80	0.195778	0.222158
	81	527.815	525.341	365.75	356.146		81	2.474	9.604			81	0.118592	0.167474
	82	517.444	520.366	363.343	366.567		82	-2.922	-3.224			82	0.0675817	0.0451372
	83	516.13	517.628	350.852	355.195		83	-1.498	-4.343			83	0.0810433	0.0344657
	84	515.87	511.11	360.509	353.726		84	4.76	6.783			84	0.140202	0.140571
	85	522.991	514.183	360.093	346.762		85	8.808	13.331			85	0.178469	0.203017
	86	514.769	511.083	356.615	343.891		86	3.686	12.724			86	0.130049	0.197229
	87	506.038	510.5	373.74	368.314		87	-4.462	5.426			87	0.0530236	0.12763
	88	514.25	501.97	354.389	340.274		88	12.28	14.115			88	0.211291	0.210494
	89	512.433	517.244	358.481	353.192		89	-4.811	5.289			89	0.0497244	0.126323
	90	506.365	501.051	345.731	344.526		90	5.314	1.205			90	0.145439	0.0873753
	91	501.933	502.833	337.712	335.154		91	-0.9	2.558			91	0.0866964	0.100278
	92	496.788	491.205	336.471	336.404		92	5.583	0.067			92	0.147982	0.0765225
	93	501.76	488.814	333.654	328.737		93	12.946	4.917			93	0.217587	0.122776
	94	492.933	486.282	333.279	327.365		94	6.651	5.914			94	0.158078	0.132284
	95	504.846	485.583	328.933	320.468		95	19.263	8.465			95	0.277304	0.156612
	96	476.875	483.417	344.212	320.487		96	-6.542	23.725			96	0.0333607	0.302142
	97	502.606	481.41	337.856	327.295		97	21.196	10.561			97	0.295577	0.176601
	98	494.25	483.801	343.173	330.776		98	10.449	12.397			98	0.193982	0.19411
	99	491.556	482.896	370.278	333.945		99	8.66	36.333			99	0.17707	0.422381
	100	494.654	485.686	358.837	343.103		100	8.968	15.734			100	0.179982	0.225934
	101	511.067	504.558	363.904	355.545		101	6.509	8.359			101	0.156736	0.155601
	102	529.154	529.192	368.538	351.455		102	-0.038	17.083			102	0.0948451	0.238799
	103	554.519	564.59	376.115	361.878		103	-10.071	14.237			103	0	0.211658
	104	505.594	506.632	369.375	361.237		104	-1.038	8.138			104	0.0853918	0.153493
	105	511.312	516.428	347.875	332.039		105	-5.116	15.836			105	0.0468412	0.226907
	106	536.62	519.158	332.22	326.671		106	17.462	5.549			106	0.260278	0.128803
	107	498.083	506.27	330.854	334.546		107	-8.187	-3.692			107	0.01781	0.0406741

## Sheet: exp1-endosome6
endosome 6								dMFI					%dMFI
	frame #	Rab5(rim)	Rab5(background)	Snx1(rim)	Snx1(background)		frame #	Rab5	Snx1			frame #	Rab5	Snx1
	1	491.875	478.388	394.375	373.033		1	13.487	21.342			1	0.19794	0.254587
	2	477.969	471.849	387.625	375.007		2	6.12	12.618			2	0.134064	0.178725
	3	547.228	535.007	426.772	412.068		3	12.221	14.704			3	0.186963	0.196864
	4	536.068	541.181	430.193	419.653		4	-5.113	10.54			4	0.0366677	0.160655
	5	530.432	532.556	413.102	403.208		5	-2.124	9.894			5	0.062584	0.155037
	6	532.148	531.118	408.102	397.569		6	1.03	10.533			6	0.0899309	0.160594
	7	529.477	538.819	408.239	416.174		7	-9.342	-7.935			7	0	0
	8	555.656	555.513	410.969	401.099		8	0.143	9.87			8	0.0822401	0.154829
	9	563.646	552.02	419.167	420.77		9	11.626	-1.603			9	0.181804	0.0550618
	10	567.935	559.98	414.37	412.865		10	7.955	1.505			10	0.149974	0.0820884
	11	586.989	573.007	426.023	418.889		11	13.982	7.134			11	0.202232	0.131037
	12	583.135	567.829	416.448	403.164		12	15.306	13.284			12	0.213712	0.184516
	13	570.073	549.908	420.76	405.263		13	20.165	15.497			13	0.255842	0.20376
	14	579.219	565.072	413.917	398.184		14	14.147	15.733			14	0.203662	0.205812
	15	578.773	566.062	408.364	403.944		15	12.711	4.42			15	0.191212	0.107437
	16	601.443	572.938	430.705	401.264		16	28.505	29.441			16	0.328154	0.325014
	17	590.511	586.986	426.663	407.486		17	3.525	19.177			17	0.111564	0.235761
	18	603.102	592.819	431.591	412.41		18	10.283	19.181			18	0.170159	0.235795
	19	584.977	579.194	421.477	416.083		19	5.783	5.394			19	0.131142	0.115906
	20	597.302	579.605	432.5	420.033		20	17.697	12.467			20	0.234443	0.177412
	21	595.802	592.967	428.365	418.434		21	2.835	9.931			21	0.105581	0.155359
	22	605.315	595.155	432.739	416.216		22	10.16	16.523			22	0.169093	0.212682
	23	589.807	576	429.795	416.715		23	13.807	13.08			23	0.200714	0.182742
	24	577.646	576.572	414.917	406.73		24	1.074	8.187			24	0.0903124	0.140194
	25	561.333	560.816	406	395.895		25	0.517	10.105			25	0.0854829	0.156872
	26	569.75	554.73	405.667	397.763		26	15.02	7.904			26	0.211232	0.137733
	27	568.576	558.676	404.239	400.831		27	9.9	3.408			27	0.166839	0.0986365
	28	575.054	558.953	410.815	404.615		28	16.101	6.2			28	0.220605	0.122915
	29	601.587	590.318	426.902	412.973		29	11.269	13.929			29	0.178709	0.190125
	30	582.467	580.689	418.098	419.169		30	1.778	-1.071			30	0.0964165	0.059688
	31	593.193	590.694	450.261	414.868		31	2.499	35.393			31	0.102668	0.376772
	32	613.739	598.875	427.875	426.938		32	14.864	0.937			32	0.209879	0.0771492
	33	588.023	576.875	412.67	414.528		33	11.148	-1.858			33	0.177659	0.0528444
	34	607.667	586.779	403.381	400.434		34	20.888	2.947			34	0.262111	0.0946277
	35	589.159	577.257	404.625	398.021		35	11.902	6.604			35	0.184197	0.126428
	36	606.568	568.792	432.136	400.208		36	37.776	31.928			36	0.408539	0.346641
	37	620.67	569.132	496.534	434.146		37	51.538	62.388			37	0.527863	0.611515
	38	638.591	583.125	479.841	431.375		38	55.466	48.466			38	0.561921	0.490452
	39	631.148	574.646	456.045	417.076		39	56.502	38.969			39	0.570903	0.407868
	40	585.898	570.257	437.943	402.34		40	15.641	35.603			40	0.216616	0.378598
	41	580.562	560.987	405.729	395.243		41	19.575	10.486			41	0.250726	0.160185
	42	694.083	588.092	532.458	425.395		42	105.991	107.063			42	1	1
	43	653.75	576.092	467.052	445.441		43	77.658	21.611			43	0.754337	0.256926
	44	671.958	577.796	446.667	414.921		44	94.162	31.746			44	0.897436	0.345058
	45	659.698	574.507	445.948	406.329		45	85.191	39.619			45	0.819653	0.41352
	46	636.667	586.5	440.594	406.664		46	50.167	33.93			46	0.515975	0.36405
	47	653.529	583.115	499.279	429.077		47	70.414	70.202			47	0.691528	0.679464
	48	644.673	572.699	451.25	400.596		48	71.974	50.654			48	0.705054	0.509478
	49	645.423	574.301	437.904	399.135		49	71.122	38.769			49	0.697667	0.406129
	50	621.481	558.256	418.212	393.853		50	63.225	24.359			50	0.629195	0.280822
	51	576.471	531.769	463.817	428.192		51	44.702	35.625			51	0.468591	0.378789
	52	586.029	538.013	456.308	409.147		52	48.016	47.161			52	0.497325	0.479104
	53	581.913	543.968	473.529	437.526		53	37.945	36.003			53	0.410004	0.382076
	54	603.16	549.895	457.86	426.48		54	53.265	31.38			54	0.542837	0.341876
	55	573.856	544.712	435.298	396.808		55	29.144	38.49			55	0.333695	0.403703
	56	571.913	552.859	403.385	392.705		56	19.054	10.68			56	0.246209	0.161872
	57	560.788	536.494	408.433	396.526		57	24.294	11.907			57	0.291642	0.172542
	58	552.056	530.36	423.667	395.341		58	21.696	28.326			58	0.269116	0.315319
	59	544.13	536.146	416.935	394.707		59	7.984	22.228			59	0.150226	0.262292
	60	539.433	539.814	413.202	381.5		60	-0.381	31.702			60	0.0776968	0.344676
	61	528.577	529.353	425.471	401.365		61	-0.776	24.106			61	0.0742719	0.278622
	62	548.759	543.244	422.741	391.445		62	5.515	31.296			62	0.128818	0.341145
	63	546.796	541.872	399	384.268		63	4.924	14.732			63	0.123694	0.197108
	64	558.898	548.256	389.602	371.726		64	10.642	17.876			64	0.173272	0.224447
	65	556.083	553.675	398.389	386.256		65	2.408	12.133			65	0.101879	0.174507
	66	567.463	571.206	386.407	373.312		66	-3.743	13.095			66	0.0485464	0.182873
	67	579.287	554.03	404.546	383.817		67	25.257	20.729			67	0.299992	0.249257
	68	549.352	535.476	380.111	363.537		68	13.876	16.574			68	0.201313	0.213125
	69	534.694	529.323	393.898	369.805		69	5.371	24.093			69	0.12757	0.278509
	70	537.657	524.421	388.565	375.128		70	13.236	13.437			70	0.195764	0.185847
	71	534.907	527.181	374.324	365.981		71	7.726	8.343			71	0.147989	0.14155
	72	547.796	536.726	386.861	366.841		72	11.07	20.02			72	0.176983	0.243091
	73	552.167	535.331	384.454	372.631		73	16.836	11.823			73	0.226978	0.171812
	74	585.194	559.344	399.657	377.312		74	25.85	22.345			74	0.305134	0.263309
	75	570.817	557.487	386.385	368.045		75	13.33	18.34			75	0.196579	0.228482
	76	548.991	533.381	382.213	359.425		76	15.61	22.788			76	0.216347	0.267161
	77	554.857	534.964	386.464	362.083		77	19.893	24.381			77	0.253483	0.281014
	78	554.952	539.026	392.067	372.942		78	15.926	19.125			78	0.219087	0.235308
	79	539.741	528.881	364.083	353.781		79	10.86	10.302			79	0.175162	0.158585
	80	535.343	519.275	369.648	360.438		80	16.068	9.21			80	0.220319	0.14909
	81	533.63	511.694	358.556	340.606		81	21.936	17.95			81	0.271197	0.225091
	82	507.952	504.077	368.25	375.231		82	3.875	-6.981			82	0.114599	0.0082958
	83	496.148	485.825	393.176	361.625		83	10.323	31.551			83	0.170506	0.343362
	84	496.565	480.775	349.833	341.281		84	15.79	8.552			84	0.217908	0.143368
	85	504.769	493.609	344.337	338.327		85	11.16	6.01			85	0.177764	0.121263
	86	482.344	490.875	341.667	338.895		86	-8.531	2.772			86	0.00703181	0.093106
	87	473.308	469.288	366.442	350.16		87	4.02	16.282			87	0.115856	0.210586
	88	484.817	479.609	349.106	342.923		88	5.208	6.183			88	0.126156	0.122767
	89	502.76	487.059	359.03	347.546		89	15.701	11.484			89	0.217136	0.168864
	90	482.04	486	359.06	343.263		90	-3.96	15.797			90	0.0466649	0.206369
	91	483.32	479.586	348.45	335.27		91	3.734	13.18			91	0.113376	0.183612
	92	465.702	471.551	342.202	330.801		92	-5.849	11.401			92	0.0302862	0.168142
	93	450.927	453.605	336.969	333.105		93	-2.678	3.864			93	0.0577805	0.102602

## Sheet: exp1-endosome7
endosome 7								dMFI					%dMFI
	frame #	Rab5(rim)	Rab5(background)	Snx1(rim)	Snx1(background)		frame #	Rab5	Snx1			frame #	Rab5	Snx1
	1	455.25	448.467	408.939	405.772		1	6.783	3.167			1	0.312812	0.422681
	2	448.841	443.936	403.174	395.473		2	4.905	7.701			2	0.292803	0.512213
	3	513.477	500.359	458.333	447.402		3	13.118	10.931			3	0.38031	0.575996
	4	510.644	504.337	499.485	467.125		4	6.307	32.36			4	0.307741	0.999151
	5	515.086	507.533	489.742	465.356		5	7.553	24.386			5	0.321016	0.84169
	6	514.72	506.181	480.265	464.053		6	8.539	16.212			6	0.331522	0.680279
	7	534.803	532.293	464.008	463.335		7	2.51	0.673			7	0.267285	0.373433
	8	529.486	516.602	448.286	441.26		8	12.884	7.026			8	0.377817	0.498884
	9	532.686	516.638	466.643	445.153		9	16.048	21.49			9	0.411528	0.784503
	10	534.795	524.154	460.886	448.819		10	10.641	12.067			10	0.353918	0.598428
	11	544.932	531.332	474.811	460.114		11	13.6	14.697			11	0.385446	0.650362
	12	546.174	536.217	470.106	443.897		12	9.957	26.209			12	0.34663	0.877688
	13	559.053	536.326	474.811	452.668		13	22.727	22.143			13	0.482691	0.797397
	14	543.947	538.386	464.53	454.31		14	5.561	10.22			14	0.299792	0.561956
	15	552.03	531.918	466.485	446.69		15	20.112	19.795			15	0.454829	0.751032
	16	596.992	561.967	482.023	457.511		16	35.025	24.512			16	0.613723	0.844178
	17	558.576	549.424	464.47	449.397		17	9.152	15.073			17	0.338053	0.657787
	18	555.712	546.462	462.894	455.913		18	9.25	6.981			18	0.339098	0.497996
	19	544.273	540.037	442.909	441.25		19	4.236	1.659			19	0.285675	0.392903
	20	536.894	541.101	448.508	444.021		20	-4.207	4.487			20	0.195717	0.448747
	21	548.083	550.283	447.97	454		21	-2.2	-6.03			21	0.217101	0.241069
	22	532.235	531.234	441.477	438.016		22	1.001	3.461			22	0.251207	0.428487
	23	548.129	554.082	448.212	447.44		23	-5.953	0.772			23	0.177114	0.375388
	24	541.136	536.021	413.833	412.016		24	5.115	1.817			24	0.29504	0.396023
	25	536.598	530.479	416.129	429.803		25	6.119	-13.674			25	0.305738	0.0901246
	26	547.75	543.021	430.75	428.309		26	4.729	2.441			26	0.290927	0.408345
	27	546.765	550.495	426.879	416.548		27	-3.73	10.331			27	0.200799	0.564148
	28	548.803	547.032	428.689	416.766		28	1.771	11.923			28	0.259411	0.595585
	29	548	547.288	440.235	447.674		29	0.712	-7.439			29	0.248127	0.213246
	30	536.227	535.467	411.167	421.12		30	0.76	-9.953			30	0.248639	0.163603
	31	535.689	535.533	409.621	415.516		31	0.156	-5.895			31	0.242203	0.243735
	32	550.621	548.946	421.78	417.245		32	1.675	4.535			32	0.258388	0.449695
	33	552.144	544.88	411.879	407.109		33	7.264	4.77			33	0.317937	0.454335
	34	562.795	548.299	414.553	409.114		34	14.496	5.439			34	0.394992	0.467546
	35	540.356	536.647	420.538	414.462		35	3.709	6.076			35	0.28006	0.480125
	36	560.189	571.565	423.205	410.598		36	-11.376	12.607			36	0.119333	0.609091
	37	545.992	550.821	423.258	431.516		37	-4.829	-8.258			37	0.18909	0.197074
	38	557.371	554.168	483.197	461.239		38	3.203	21.958			38	0.274668	0.793744
	39	531.818	528.603	451.553	441.043		39	3.215	10.51			39	0.274796	0.567682
	40	533.856	528.234	433.091	441.929		40	5.622	-8.838			40	0.300442	0.18562
	41	532.038	524.38	413.174	417.13		41	7.658	-3.956			41	0.322135	0.282024
	42	530.561	535.408	424.977	432.576		42	-4.847	-7.599			42	0.188898	0.210087
	43	541.167	545.652	417.197	435.435		43	-4.485	-18.238			43	0.192755	0
	44	536.371	522.549	424.045	422.587		44	13.822	1.458			44	0.387811	0.388934
	45	523.311	514.038	403.932	401.418		45	9.273	2.514			45	0.339343	0.409787
	46	528.265	523.636	401.909	404.924		46	4.629	-3.015			46	0.289862	0.300606
	47	513.303	510.207	384.712	386.88		47	3.096	-2.168			47	0.273528	0.317332
	48	501.371	504.848	386.447	392.049		48	-3.477	-5.602			48	0.203495	0.249521
	49	491.197	493.196	422.712	406.924		49	-1.999	15.788			49	0.219242	0.671906
	50	483.386	505.962	409.667	417.516		50	-22.576	-7.849			50	0	0.20515
	51	465.032	463.699	381.879	376.114		51	1.333	5.765			51	0.254744	0.473984
	52	481.524	485.744	380.54	381.42		52	-4.22	-0.88			52	0.195578	0.342766
	53	466.444	472.597	386.726	394.455		53	-6.153	-7.729			53	0.174983	0.20752
	54	463.839	467.068	365.774	370.108		54	-3.229	-4.334			54	0.206137	0.27456
	55	497.427	484.443	396.774	392.443		55	12.984	4.331			55	0.378882	0.445667
	56	484.411	486.761	378.056	387.807		56	-2.35	-9.751			56	0.215503	0.167591
	57	487.056	485.727	398.008	387.119		57	1.329	10.889			57	0.254701	0.575166
	58	476.819	471.233	377.371	377.11		58	5.586	0.261			58	0.300059	0.365297
	59	470.716	473.628	368.147	379.64		59	-2.912	-11.493			59	0.209515	0.133192
	60	490.992	480.301	379.725	365.989		60	10.691	13.736			60	0.354451	0.631386
	61	478.344	469.539	365.367	370.444		61	8.805	-5.077			61	0.334356	0.259888
	62	465.856	463.601	363.826	358.766		62	2.255	5.06			62	0.264568	0.460062
	63	466.914	466.106	363.734	365.561		63	0.808	-1.827			63	0.24915	0.324065
	64	496.644	483.793	365.606	370.37		64	12.851	-4.764			64	0.377465	0.266069
	65	499.419	472.76	396.037	377.911		65	26.659	18.126			65	0.524586	0.718074
	66	474.779	469.797	375.956	367.536		66	4.982	8.42			66	0.293623	0.526411
	67	475.478	475.755	379.691	381.344		67	-0.277	-1.653			67	0.23759	0.327501
	68	484.096	463.005	368.61	372.099		68	21.091	-3.489			68	0.46526	0.291246
	69	495.72	491.984	358.447	363.899		69	3.736	-5.452			69	0.280347	0.252483
	70	489.182	474.176	362.152	357.957		70	15.006	4.195			70	0.400426	0.442981
	71	524.274	492.989	398.581	379.318		71	31.285	19.263			71	0.573875	0.740526
	72	490.826	485.495	400.212	396.668		72	5.331	3.544			72	0.297342	0.430126
	73	488.2	491.52	372.843	365.571		73	-3.32	7.272			73	0.205168	0.503742
	74	513.479	513.026	404.179	398.398		74	0.453	5.781			74	0.245368	0.474299
	75	503.086	500.156	394.797	381.328		75	2.93	13.469			75	0.27176	0.626113
	76	512.383	486.078	385.969	378.878		76	26.305	7.091			76	0.520814	0.500168
	77	461.386	471.582	373.336	367.776		77	-10.196	5.56			77	0.131906	0.469935
	78	461.243	462.265	353.764	355.429		78	-1.022	-1.665			78	0.229652	0.327264
	79	552.118	480.839	369.875	362.068		79	71.279	7.807			79	1	0.514307
	80	517.625	471.802	429.419	397.016		80	45.823	32.403			80	0.728773	1
	81	516.14	468.562	390.706	370.984		81	47.578	19.722			81	0.747472	0.74959
	82	503.404	465.448	409.36	388.719		82	37.956	20.641			82	0.644952	0.767738
	83	455.441	452.339	379.765	365.911		83	3.102	13.854			83	0.273592	0.633716
	84	480.507	456.125	372.551	365.083		84	24.382	7.468			84	0.500325	0.507612
	85	470.978	450.5	375.89	350.417		85	20.478	25.473			85	0.458729	0.863154
	86	452.639	451.765	327.014	321.18		86	0.874	5.834			86	0.249853	0.475346
	87	440.243	449.24	328.993	339.668		87	-8.997	-10.675			87	0.144681	0.149345
	88	440.664	435.25	328.514	322.107		88	5.414	6.407			88	0.298226	0.486661
	89	439.629	442.781	339.493	331.367		89	-3.152	8.126			89	0.206958	0.520606
	90	441.455	453.962	332.788	327.37		90	-12.507	5.418			90	0.107283	0.467131
	91	428.926	434.901	324.279	316.714		91	-5.975	7.565			91	0.176879	0.509528
	92	425.486	420.46	324.188	318.23		92	5.026	5.958			92	0.294092	0.477795
	93	423.95	425.301	316.857	310.189		93	-1.351	6.668			93	0.226147	0.491815
	94	432.836	437.372	325.971	323.704		94	-4.536	2.267			94	0.192211	0.404909
	95	420.871	421.617	331.771	333.633		95	-0.746	-1.862			95	0.232593	0.323374
	96	422.597	409.735	320.556	318.83		96	12.862	1.726			96	0.377582	0.394226
	97	430.539	425.279	326.125	320.312		97	5.26	5.813			97	0.296585	0.474931
	98	441.072	434.899	327.428	327.236		98	6.173	0.192			98	0.306313	0.363934
	99	432.5	425.44	323.385	324.145		99	7.06	-0.76			99	0.315764	0.345135
	100	439.934	440.005	356.338	351.161		100	-0.071	5.177			100	0.239785	0.462372
	101	452.471	446.078	327.662	329.411		101	6.393	-1.749			101	0.308657	0.325606
	102	445.426	450.469	332.706	339.854		102	-5.043	-7.148			102	0.186809	0.218993
	103	452.029	455.469	331.809	337.943		103	-3.44	-6.134			103	0.203889	0.239016
	104	447.162	445.073	348.662	341.302		104	2.089	7.36			104	0.262799	0.50548
	105	444.894	455.473	318.023	318.582		105	-10.579	-0.559			105	0.127825	0.349104
	106	438.684	452.547	328.338	321.844		106	-13.863	6.494			106	0.0928347	0.488379
	107	443.576	448.085	327.049	312.85		107	-4.509	14.199			107	0.192499	0.640528
	108	437.419	423.135	317.919	305.115		108	14.284	12.804			108	0.392733	0.612982
	109	422.706	429	319.463	301.438		109	-6.294	18.025			109	0.17348	0.71608
	110	411.914	420.26	305.364	302.408		110	-8.346	2.956			110	0.151617	0.418515
	111	405.386	416.212	291.902	295.641		111	-10.826	-3.739			111	0.125193	0.28631
	112	406.603	420.344	303.191	297.849		112	-13.741	5.342			112	0.0941346	0.465631
	113	409.5	418.125	300.596	300.401		113	-8.625	0.195			113	0.148644	0.363994
	114	416.853	428.349	315.978	301.562		114	-11.496	14.416			114	0.118054	0.644813
	115	410.949	416.786	299.213	298.562		115	-5.837	0.651			115	0.17835	0.372998
	116	399.492	410.989	291.177	290.386		116	-11.497	0.791			116	0.118044	0.375763
	117	401.697	407.894	289.538	285.628		117	-6.197	3.91			117	0.174514	0.437353
	118	408.735	417.158	286.561	281.25		118	-8.423	5.311			118	0.150796	0.465018
	119	427.121	424.864	300.25	303.571		119	2.257	-3.321			119	0.264589	0.294564
	120	426.765	432.082	322.386	310.457		120	-5.317	11.929			120	0.18389	0.595703
	121	418.765	429.207	303.856	304.967		121	-10.442	-1.111			121	0.129285	0.338204
	122	422.055	430.356	307.148	315.55		122	-8.301	-8.402			122	0.152096	0.19423
	123	416.971	417.312	323.346	320.427		123	-0.341	2.919			123	0.236908	0.417784
	124	403.235	418.188	298.875	304.312		124	-14.953	-5.437			124	0.081221	0.252779

## Sheet: exp1-endosome8
endosome 8								dMFI					%dMFI
	frame #	Rab5(rim)	Rab5(background)	Snx1(rim)	Snx1(background)		frame #	Rab5	Snx1			frame #	Rab5	Snx1
	1	335.038	334.404	365.904	380.378		1	0.634	-14.474			1	0.190577	0.161513
	2	335.269	336.122	362.106	380.167		2	-0.853	-18.061			2	0.179773	0.132492
	3	357.24	367.776	417.067	415.853		3	-10.536	1.214			3	0.10942	0.288439
	4	357.346	382.942	408.692	429.66		4	-25.596	-20.968			4	0	0.108972
	5	365.312	365.849	394.854	419.546		5	-0.537	-24.692			5	0.182069	0.078843
	6	351.385	355.461	383.448	402.27		6	-4.076	-18.822			6	0.156356	0.126335
	7	370.312	382.914	383.708	418.145		7	-12.602	-34.437			7	0.0944091	0
	8	370.53	379.112	367.64	389.467		8	-8.582	-21.827			8	0.123617	0.102023
	9	359.087	367.244	364.5	384.25		9	-8.157	-19.75			9	0.126705	0.118827
	10	371.24	371.333	380.317	398.718		10	-0.093	-18.401			10	0.185294	0.129741
	11	381.625	391.308	393.279	400.59		11	-9.683	-7.311			11	0.115617	0.219466
	12	386.01	407.59	393.038	421.045		12	-21.58	-28.007			12	0.0291786	0.0520227
	13	383.952	384.276	379.106	398.359		13	-0.324	-19.253			13	0.183616	0.122848
	14	403.712	399.744	391.827	404.949		14	3.968	-13.122			14	0.2148	0.172451
	15	399.116	403.095	409.161	410.155		15	-3.979	-0.994			15	0.15706	0.270574
	16	437.295	415.649	466.973	415.226		16	21.646	51.747			16	0.343241	0.697282
	17	414.241	404.419	422.784	422.221		17	9.822	0.563			17	0.257333	0.283172
	18	416.638	410	402.336	427.797		18	6.638	-25.461			18	0.234199	0.0726214
	19	400.302	406.413	381.957	412.669		19	-6.111	-30.712			19	0.14157	0.0301375
	20	446.259	425.448	431.138	420.983		20	20.811	10.155			20	0.337174	0.360777
	21	415.817	412.403	412.175	426.102		21	3.414	-13.927			21	0.210775	0.165939
	22	406.017	415.57	393.052	398.058		22	-9.553	-5.006			22	0.116562	0.238115
	23	398.758	399.352	383.274	380.915		23	-0.594	2.359			23	0.181654	0.297702
	24	418.847	404.83	373.766	366.318		24	14.017	7.448			24	0.287812	0.338875
	25	416.169	395.369	380.202	374.358		25	20.8	5.844			25	0.337094	0.325898
	26	408.476	386.006	369.323	386.119		26	22.47	-16.796			26	0.349228	0.142727
	27	441.517	409.105	371.328	386.657		27	32.412	-15.329			27	0.421463	0.154595
	28	544.167	432.128	516.889	441.159		28	112.039	75.73			28	1	0.891319
	29	504.019	436.026	491.837	454.974		29	67.993	36.863			29	0.67998	0.576861
	30	478.721	424.096	451.721	443.167		30	54.625	8.554			30	0.582853	0.347824
	31	454.067	408.942	488.298	468.353		31	45.125	19.945			31	0.51383	0.439984
	32	496.406	426.118	517.375	503.342		32	70.288	14.033			32	0.696654	0.392152
	33	428.281	413.046	454.302	453.217		33	15.235	1.085			33	0.296661	0.287395
	34	436.74	420.737	504.229	415.066		34	16.003	89.163			34	0.302241	1
	35	445.802	420.289	474.938	432.276		35	25.513	42.662			35	0.371337	0.623778
	36	432.979	400.605	456.198	411.164		36	32.374	45.034			36	0.421186	0.642969
	37	414.302	406.184	371.552	384.586		37	8.118	-13.034			37	0.244952	0.173163
	38	386.646	394.355	381.625	393.671		38	-7.709	-12.046			38	0.12996	0.181157
	39	394.99	390.086	405.844	400.895		39	4.904	4.949			39	0.221601	0.318657
	40	411.719	417.388	368.833	373.987		40	-5.669	-5.154			40	0.144781	0.236917

## Sheet: exp1-endosome9
endosome 9								dMFI					%dMFI
	frame #	Rab5(rim)	Rab5(background)	Snx1(rim)	Snx1(background)		frame #	Rab5	Snx1			frame #	Rab5	Snx1
	1	536.48	540.658	279.5	276.263		1	-4.178	3.237			1	0.0657381	0.463826
	2	532.708	541.191	275.76	276.099		2	-8.483	-0.339			2	0.0205517	0.393809
	3	551.302	561.743	287.125	289.724		3	-10.441	-2.599			3	0	0.349558
	4	574.279	567.782	291.673	289.929		4	6.497	1.744			4	0.177786	0.434594
	5	571.596	566.378	289.365	285.833		5	5.218	3.532			5	0.164361	0.469602
	6	558.933	557.622	286.471	282.801		6	1.311	3.67			6	0.123352	0.472304
	7	575.287	564.098	293.361	284.213		7	11.189	9.148			7	0.227034	0.579563
	8	560.741	560.427	284.046	275.896		8	0.314	8.15			8	0.112887	0.560022
	9	567.407	567.457	280.722	277.701		9	-0.05	3.021			9	0.109067	0.459597
	10	560.574	558.841	283.167	280.604		10	1.733	2.563			10	0.127782	0.450629
	11	573.491	565.823	283.389	278.409		11	7.668	4.98			11	0.190077	0.497954
	12	571.889	565.688	283.287	279.238		12	6.201	4.049			12	0.174679	0.479725
	13	565.222	563.294	281.435	280.019		13	1.928	1.416			13	0.129828	0.428171
	14	570.769	556.841	279.148	273.061		14	13.928	6.087			14	0.255783	0.519629
	15	564.333	554.819	277.343	275.756		15	9.514	1.587			15	0.209453	0.43152
	16	562.444	550.146	272.009	273.012		16	12.298	-1.003			16	0.238675	0.380808
	17	582.796	562.677	281.963	278.872		17	20.119	3.091			17	0.320766	0.460968
	18	565.963	547.86	271.167	269.433		18	18.103	1.734			18	0.299605	0.434398
	19	573.463	552.963	279.454	276.506		19	20.5	2.948			19	0.324765	0.458168
	20	555.213	541.805	272.315	267.36		20	13.408	4.955			20	0.250325	0.497464
	21	556.103	536.826	270.362	265.186		21	19.277	5.176			21	0.311928	0.501792
	22	547.225	532.46	272.1	265.847		22	14.765	6.253			22	0.264569	0.522879
	23	549.7	528.676	267.317	261.381		23	21.024	5.936			23	0.330265	0.516672
	24	539.319	525.849	266.422	261.221		24	13.47	5.201			24	0.250976	0.502281
	25	532.784	514.302	259.491	253.75		25	18.482	5.741			25	0.303583	0.512854
	26	520.784	506.233	262.871	256.233		26	14.551	6.638			26	0.262323	0.530417
	27	514.897	506.308	257.543	252.297		27	8.589	5.246			27	0.199744	0.503162
	28	507.871	495.605	251.879	249.128		28	12.266	2.751			28	0.238339	0.45431
	29	506.793	492.552	265.716	261.849		29	14.241	3.867			29	0.259069	0.476162
	30	525.569	501.517	255.44	251.134		30	24.052	4.306			30	0.362048	0.484757
	31	506.138	485.378	251.397	248.994		31	20.76	2.403			31	0.327494	0.447497
	32	531.268	506.244	260.643	255.762		32	25.024	4.881			32	0.37225	0.496016
	33	530.589	502.756	256.223	255.399		33	27.833	0.824			33	0.401734	0.41658
	34	512.565	498.5	252.694	251.506		34	14.065	1.188			34	0.257221	0.423707
	35	519.083	491.134	255.269	249.762		35	27.949	5.507			35	0.402952	0.508272
	36	530.181	499.779	250.026	247.395		36	30.402	2.631			36	0.428699	0.451961
	37	527.216	492.721	254.603	249.57		37	34.495	5.033			37	0.47166	0.498992
	38	529.474	500.779	268.483	262.744		38	28.695	5.739			38	0.410782	0.512815
	39	518.267	499.75	259.586	258.808		39	18.517	0.778			39	0.303951	0.41568
	40	519.276	504.547	257.75	257.267		40	14.729	0.483			40	0.264191	0.409903
	41	517.853	500.872	254.871	252.372		41	16.981	2.499			41	0.287829	0.449376
	42	538.017	510.622	259.888	255.18		42	27.395	4.708			42	0.397137	0.492628
	43	526.966	509.047	261.638	258.453		43	17.919	3.185			43	0.297674	0.462808
	44	530.543	507.25	257.784	252.43		44	23.293	5.354			44	0.354081	0.505277
	45	517.224	500.942	270.371	265.5		45	16.282	4.871			45	0.280492	0.49582
	46	516.466	501.686	264.009	266.227		46	14.78	-2.218			46	0.264726	0.357018
	47	518.75	499.971	279.578	281.767		47	18.779	-2.189			47	0.306701	0.357586
	48	516.698	494.198	270.69	265.994		48	22.5	4.696			48	0.345757	0.492393
	49	509.345	492.837	248.69	249.581		49	16.508	-0.891			49	0.282864	0.383001
	50	510.672	496.192	254.345	245.395		50	14.48	8.95			50	0.261577	0.575686
	51	497.414	477.622	257.422	252.756		51	19.792	4.666			51	0.317334	0.491806
	52	492.931	483.814	252.121	247.709		52	9.117	4.412			52	0.205286	0.486833
	53	491.612	481.436	248.69	245.68		53	10.176	3.01			53	0.216401	0.459382
	54	501.345	485.366	247.853	244.762		54	15.979	3.091			54	0.277311	0.460968
	55	521	493.041	251.75	250.14		55	27.959	1.61			55	0.403057	0.43197
	56	529.713	499.421	252.565	247.872		56	30.292	4.693			56	0.427544	0.492335
	57	521.898	496.402	257.231	251.457		57	25.496	5.774			57	0.377204	0.5135
	58	525.565	478.067	259.759	247.53		58	47.498	12.229			58	0.608143	0.639888
	59	538.116	484.089	270.911	253.452		59	54.027	17.459			59	0.676673	0.74229
	60	538.343	495.97	258.722	251.622		60	42.373	7.1			60	0.55435	0.539463
	61	571.509	496.78	273.944	249.159		61	74.729	24.785			61	0.893967	0.885732
	62	580.833	505.394	263.972	257.038		62	75.439	6.934			62	0.901419	0.536213
	63	573.852	500.25	262.481	247.018		63	73.602	15.463			63	0.882137	0.703209
	64	566.694	502.055	262.444	247.268		64	64.639	15.176			64	0.788059	0.69759
	65	559.222	489.006	271.056	250.598		65	70.216	20.458			65	0.846597	0.80101
	66	536.009	483.605	278.319	247.698		66	52.404	30.621			66	0.659638	1
	67	558.155	478.523	292.164	262.506		67	79.632	29.658			67	0.94543	0.981145
	68	511.611	482.354	276.759	255.701		68	29.257	21.058			68	0.416681	0.812758
	69	491.315	487.134	247.861	245.561		69	4.181	2.3			69	0.153476	0.44548
	70	496.056	494.25	240.019	240.884		70	1.806	-0.865			70	0.128548	0.38351
	71	532.787	490.012	253.87	247.177		71	42.775	6.693			71	0.558569	0.531494
	72	561.778	498.256	267.065	254.732		72	63.522	12.333			72	0.776335	0.641924
	73	576.398	491.567	273.62	258.457		73	84.831	15.163			73	1	0.697335
	74	524.157	484.104	276.769	260.268		74	40.053	16.501			74	0.529998	0.723533
	75	564.583	498.244	272.083	257.03		75	66.339	15.053			75	0.805903	0.695181
	76	544.111	494.756	268.88	253.659		76	49.355	15.221			76	0.627635	0.698471
	77	542.704	495.396	272.25	248.506		77	47.308	23.744			77	0.606149	0.86535
	78	537.426	484.079	268.407	244.652		78	53.347	23.755			78	0.669536	0.865565
	79	543.63	486.683	270.222	245.89		79	56.947	24.332			79	0.707322	0.876863
	80	550	496.64	262.222	247.963		80	53.36	14.259			80	0.669672	0.679635
	81	533.574	486.073	259.046	246.421		81	47.501	12.625			81	0.608174	0.647642
	82	534.343	485.909	269.787	241.799		82	48.434	27.988			82	0.617968	0.948446
	83	507.593	475.433	261.5	238.421		83	32.16	23.079			83	0.447151	0.852329
	84	505.389	463.774	256.713	238.128		84	41.615	18.585			84	0.546393	0.764337
	85	494.657	466.213	247.509	236.085		85	28.444	11.424			85	0.408147	0.624126
	86	485.972	470.982	250.704	244.878		86	14.99	5.826			86	0.26693	0.514518
	87	501.435	477.207	255.639	246.415		87	24.228	9.224			87	0.363895	0.581051
	88	487.046	473.787	259.574	251.524		88	13.259	8.05			88	0.248761	0.558064
	89	499.759	480.994	255.602	256.884		89	18.765	-1.282			89	0.306554	0.375345
	90	489.839	478.601	253.857	257.173		90	11.238	-3.316			90	0.227548	0.33552
	91	493.991	479.47	244.339	248.042		91	14.521	-3.703			91	0.262008	0.327942
	92	484.306	470.963	238.472	237.159		92	13.343	1.313			92	0.249643	0.426155
	93	458.213	450.207	229.731	228.695		93	8.006	1.036			93	0.193625	0.420731
	94	495.698	476.919	245.483	242.983		94	18.779	2.5			94	0.306701	0.449396
	95	504.839	488.083	254.295	254.208		95	16.756	0.087			95	0.285467	0.40215
	96	492.389	478.36	273.648	272.28		96	14.029	1.368			96	0.256844	0.427232
	97	491.556	490.311	260.639	272.006		97	1.245	-11.367			97	0.122659	0.177883
	98	487.028	492.232	265.065	262.47		98	-5.204	2.595			98	0.0549689	0.451256
	99	491.787	495.573	267.519	268.134		99	-3.786	-0.615			99	0.0698526	0.388405
	100	478.602	479.567	266.333	260.561		100	-0.965	5.772			100	0.0994626	0.513461
	101	482.5	492.567	243.426	252.03		101	-10.067	-8.604			101	0.0039256	0.231982
	102	505.62	514.384	247.75	264.677		102	-8.764	-16.927			102	0.0176022	0.0690189
	103	506.481	512.659	260.815	271.652		103	-6.178	-10.837			103	0.0447456	0.18826
	104	491.62	498.4	270.046	267.369		104	-6.78	2.677			104	0.0384268	0.452862
	105	497.491	495.562	257.926	260.075		105	1.929	-2.149			105	0.129839	0.358369
	106	485.607	486.506	257.759	259.911		106	-0.899	-2.152			106	0.100155	0.358311
	107	482.804	477.548	256.723	259.387		107	5.256	-2.664			107	0.16476	0.348286
	108	500.116	496.946	259.625	252.726		108	3.17	6.899			108	0.142865	0.535528
	109	480	480.756	249.679	270.131		109	-0.756	-20.452			109	0.101656	0
	110	492.286	491.357	229.179	231.315		110	0.929	-2.136			110	0.119343	0.358624
	111	503.963	504.848	234.213	239.616		111	-0.885	-5.403			111	0.100302	0.294657
	112	487.843	486.646	239.667	241.628		112	1.197	-1.961			112	0.122156	0.36205
	113	490.074	488.957	242.602	244.915		113	1.117	-2.313			113	0.121316	0.355158
	114	491.889	482.201	247.713	253.207		114	9.688	-5.494			114	0.211279	0.292875
	115	483.231	475.707	232.778	238.518		115	7.524	-5.74			115	0.188565	0.288058
	116	475.611	467.555	234.435	229.787		116	8.056	4.648			116	0.194149	0.491453
	117	487.963	471.921	235.102	233.829		117	16.042	1.273			117	0.277973	0.425372
	118	480.815	474.079	225.611	223.055		118	6.736	2.556			118	0.180294	0.450492
	119	492.481	470.171	225.917	230.585		119	22.31	-4.668			119	0.343763	0.309048
	120	479.833	480.963	225.963	224.53		120	-1.13	1.433			120	0.0977307	0.428504
	121	482.694	481.787	236.583	235.75		121	0.907	0.833			121	0.119112	0.416756
	122	470.213	475.037	227.667	225.207		122	-4.824	2.46			122	0.0589575	0.448613
	123	468.435	474.97	225.13	228.201		123	-6.535	-3.071			123	0.0409984	0.340317
	124	451.722	455.848	223.102	219.323		124	-4.126	3.779			124	0.0662839	0.474439
	125	456.442	464.66	215.375	217.096		125	-8.218	-1.721			125	0.0233332	0.36675
	126	457.889	449.622	214.519	215.146		126	8.267	-0.627			126	0.196364	0.38817
	127	444.796	442.061	211	212.427		127	2.735	-1.427			127	0.138299	0.372506
	128	452.806	450.628	217.583	214.03		128	2.178	3.553			128	0.132452	0.470014
	129	446.278	441.055	216.194	211.976		129	5.223	4.218			129	0.164413	0.483034
	130	443.944	446.451	213.565	212.909		130	-2.507	0.656			130	0.0832774	0.413291
	131	448.324	445.213	212.741	211.067		131	3.111	1.674			131	0.142245	0.433223
	132	456.87	455.902	219.102	218.835		132	0.968	0.267			132	0.119752	0.405674
	133	451.907	458.976	219.954	219.049		133	-7.069	0.905			133	0.0353934	0.418166
	134	467.694	455.262	222.426	213.079		134	12.432	9.347			134	0.240081	0.583459
	135	463.333	454.28	226.324	215.628		135	9.053	10.696			135	0.204614	0.609872

## Sheet: exp1-endosome10
endosome 10								dMFI					%dMFI
	frame #	Rab5(rim)	Rab5(background)	Snx1(rim)	Snx1(background)		frame #	Rab5	Snx1			frame #	Rab5	Snx1
	1	564.694	552.659	697.661	692.841		1	12.035	4.82			1	0.417795	0.268589
	2	581.556	569.188	708.645	708.08		2	12.368	0.565			2	0.421111	0.235127
	3	564.411	553.517	711.556	700.812		3	10.894	10.744			3	0.406433	0.315175
	4	595.339	582.04	767.597	745.375		4	13.299	22.222			4	0.430382	0.405439
	5	608.955	583.565	757.667	728.641		5	25.39	29.026			5	0.550787	0.458946
	6	601.932	574.929	722.197	701.853		6	27.003	20.344			6	0.566849	0.39067
	7	612.962	587.511	733.985	719.207		7	25.451	14.778			7	0.551394	0.346899
	8	590.855	565.761	716.097	697.778		8	25.094	18.319			8	0.547839	0.374745
	9	578.613	564.96	721.621	710.233		9	13.653	11.388			9	0.433908	0.32024
	10	590.944	587.312	730.75	712.074		10	3.632	18.676			10	0.334117	0.377553
	11	580.586	581	752.569	764.052		11	-0.414	-11.483			11	0.293826	0.140381
	12	592.565	580.682	741.669	737.739		12	11.883	3.93			12	0.416282	0.26159
	13	591.468	587.131	727.597	722.256		13	4.337	5.341			13	0.341137	0.272686
	14	596.403	593.188	714.879	708.989		14	3.215	5.89			14	0.329964	0.277003
	15	601.061	597.348	712.788	707.554		15	3.713	5.234			15	0.334923	0.271844
	16	613.073	602.943	699.081	703.102		16	10.13	-4.021			16	0.398825	0.199063
	17	615.444	605.335	747.895	738.165		17	10.109	9.73			17	0.398616	0.307201
	18	605.578	610.791	715.491	720.564		18	-5.213	-5.073			18	0.246037	0.19079
	19	603.422	611.558	711.181	721.814		19	-8.136	-10.633			19	0.216929	0.147066
	20	592.024	582.915	685.202	680.744		20	9.109	4.458			20	0.388658	0.265742
	21	599.847	601.034	689.177	699.585		21	-1.187	-10.408			21	0.286128	0.148835
	22	600.774	610.96	693.613	714.75		22	-10.186	-21.137			22	0.196515	0.0644616
	23	592.439	593.005	682.886	688.668		23	-0.566	-5.782			23	0.292312	0.185214
	24	592.955	589.446	719.788	719.967		24	3.509	-0.179			24	0.332892	0.229276
	25	595.757	579.953	679.515	666.323		25	15.804	13.192			25	0.455328	0.334426
	26	596.184	577.141	701.779	672.396		26	19.043	29.383			26	0.487582	0.461753
	27	585	576.609	728.449	702.25		27	8.391	26.199			27	0.381508	0.436714
	28	588.044	582.354	677.265	663.865		28	5.69	13.4			28	0.354611	0.336062
	29	566.897	566.219	673.662	662.865		29	0.678	10.797			29	0.3047	0.315592
	30	588.581	582.552	713.882	686.13		30	6.029	27.752			30	0.357986	0.448927
	31	571.316	562.786	661.478	653.823		31	8.53	7.655			31	0.382892	0.290883
	32	579.059	576.714	686.14	671.818		32	2.345	14.322			32	0.321301	0.343313
	33	571.11	560.943	656.765	643.958		33	10.167	12.807			33	0.399193	0.331399
	34	575.015	558.276	669.831	637.49		34	16.739	32.341			34	0.464639	0.485015
	35	612.735	567.935	679.182	658.484		35	44.8	20.698			35	0.744075	0.393454
	36	636.375	565.875	722.779	682.271		36	70.5	40.508			36	1	0.549241
	37	611.074	561.776	739.735	680.375		37	49.298	59.36			37	0.788867	0.697494
	38	580.618	554.104	712.39	667.807		38	26.514	44.583			38	0.56198	0.581287
	39	547.566	543.073	643.434	628.141		39	4.493	15.293			39	0.342691	0.350949
	40	543.801	539.214	634.316	616.719		40	4.587	17.597			40	0.343627	0.369068
	41	562.044	547.214	648.574	616.911		41	14.83	31.663			41	0.445628	0.479683
	42	567.154	539.38	672.279	620.266		42	27.774	52.013			42	0.574527	0.639717
	43	587.36	538.745	730.86	645.917		43	48.615	84.943			43	0.782065	0.89868
	44	572.331	528.328	681.662	615.964		44	44.003	65.698			44	0.736138	0.747336
	45	548.507	520.896	684.603	608.682		45	27.611	75.921			45	0.572904	0.82773
	46	525.779	506.943	619.331	579.036		46	18.836	40.295			46	0.485521	0.547566
	47	527.235	521.516	638.566	582.969		47	5.719	55.597			47	0.354899	0.667901
	48	532.311	517.076	611.023	586.804		48	15.235	24.219			48	0.449661	0.421143
	49	528.641	502.083	637.82	592.461		49	26.558	45.359			49	0.562418	0.587389
	50	522.447	502.62	673.97	592.658		50	19.827	81.312			50	0.495389	0.870125
	51	501.159	483.995	681.235	583.408		51	17.164	97.827			51	0.468871	1
	52	477.568	471.37	593.076	583.723		52	6.198	9.353			52	0.359669	0.304236
	53	467.871	477.424	592.197	582.864		53	-9.553	9.333			53	0.202818	0.304079
	54	475.5	468.641	587.75	551.182		54	6.859	36.568			54	0.366252	0.518256
	55	461.426	466.12	574.037	542.693		55	-4.694	31.344			55	0.251205	0.477175
	56	455.037	461.938	553.412	522.615		56	-6.901	30.797			56	0.229227	0.472873
	57	458.382	465.594	572.912	548.464		57	-7.212	24.448			57	0.22613	0.422944
	58	405.15	430.811	501.607	510.367		58	-25.661	-8.76			58	0.0424119	0.161795
	59	414.919	439.193	481.574	494.49		59	-24.274	-12.916			59	0.0562239	0.129112
	60	411.529	430.859	507.324	519.37		60	-19.33	-12.046			60	0.105457	0.135954
	61	393.441	419.719	538.206	530.302		61	-26.278	7.904			61	0.0362677	0.292841
	62	383.243	407.526	517.919	523.307		62	-24.283	-5.388			62	0.0561342	0.188312
	63	381.676	410.635	519.309	518.693		63	-28.959	0.616			63	0.00956981	0.235528
	64	397.721	427.641	485.228	514.562		64	-29.92	-29.334			64	0	0

[truncated: 31 more sheets: exp1-endosome11, exp1-endosome12, exp1-endosome13, exp1-endosome14, exp1-time, exp1-aligned, exp2-endosome1, exp2-endosome2, exp2-endosome3, exp2-endosome4, exp2-endosome5, exp2-endosome6, exp2-endosome7, exp2-endosome8, exp2-endosome9, exp2-endosome10, exp2-endosome11, exp2-endosome12, exp2-time, exp2-aligned …]
