# Supplementary material for: A novel live-cell imaging assay reveals regulation of endosome maturation
Source: eLife. 2021 Nov 30;10:e70982. doi: 10.7554/eLife.70982 (PMC8635980; doi:10.7554/eLife.70982)
Supplement: Figure 6—source data 2. [file elife-70982-fig6-data2.xlsx]

## Sheet: exp1-endosome1
endosome 1		t1				t2				t3				t4				t5
line profiles			Rab5	Snx1			Rab5	Snx1			Rab5	Snx1			Rab5	Snx1			Rab5	Snx1
		0	1066.96	592.257		0	1098.46	767.801		0	952.082	798.479		0	961.732	641.531		0	862.019	545.117
		0.10913	1082.84	619.728		0.10913	1115.95	694.377		0.10913	950.745	883.927		0.10913	997.607	639.84		0.10913	885.92	561.785
		0.21825	1083.53	611.652		0.21825	1179.1	690.548		0.21825	957.167	948.971		0.21825	1005.76	640.257		0.21825	888.026	555.185
		0.32738	1060.91	611.856		0.32738	1219.96	697.679		0.32738	974.183	959.252		0.32738	976.048	623.733		0.32738	854.742	587.936
		0.43651	1036.25	611.067		0.43651	1175.38	727.18		0.43651	1014.77	926.643		0.43651	922.087	602.743		0.43651	882.482	621.955
		0.54563	1031.35	601.827		0.54563	1116.68	752.512		0.54563	1052.51	904.301		0.54563	894.463	576.007		0.54563	905.434	635.542
		0.65476	1051.2	563.193		0.65476	1102.17	797.22		0.65476	1060.48	882.326		0.65476	902.591	566.056		0.65476	885.852	688.938
		0.76389	1068.93	578.504		0.76389	1174.58	849.228		0.76389	1086.22	822.755		0.76389	907.731	579.911		0.76389	873.496	656.378
		0.87302	1056.74	564.307		0.87302	1245.83	833.784		0.87302	1081.32	725.281		0.87302	888.799	563.953		0.87302	878.807	617.33
		0.98214	1084.09	584.756		0.98214	1338.46	790.54		0.98214	1061.87	675.842		0.98214	885.04	550.837		0.98214	864.252	581.925
		1.09127	1091.23	597.702		1.09127	1373.03	733.369		1.09127	1069.41	666.357		1.09127	896.299	543.896		1.09127	870.855	571.333
		1.2004	1089.4	606.509		1.2004	1393.3	691.729		1.2004	1036.73	618.602		1.2004	899.829	547.697		1.2004	918.483	571.963
		1.30952	1146.58	635.35		1.30952	1403.39	704.185		1.30952	1005.14	633.302		1.30952	911.232	547.436		1.30952	933.198	564.954
		1.41865	1196.93	658.14		1.41865	1335.91	720.485		1.41865	983.432	649.801		1.41865	926.112	528.825		1.41865	952.437	563.132
		1.52778	1230.74	673.802		1.52778	1329.35	681.072		1.52778	977.917	622.634		1.52778	941.304	546.19		1.52778	947.395	553.039
		1.6369	1274.02	683.414		1.6369	1396.87	672.691		1.6369	1005.99	612.424		1.6369	927.336	566.129		1.6369	943.419	581.883
		1.74603	1218.88	686.137		1.74603	1455.87	736.138		1.74603	1043.6	655.831		1.74603	980.077	581.065		1.74603	955.916	614.105
		1.85516	1180.77	668.247		1.85516	1503.42	751.65		1.85516	1061.73	656.491		1.85516	1026	604.467		1.85516	938.822	613.222
		1.96429	1140.55	664.516		1.96429	1542.28	801.478		1.96429	1103.72	685.464		1.96429	1018.27	655.037		1.96429	954.718	630.106
		2.07341	1127.06	649.813		2.07341	1568.05	781.399		2.07341	1154.26	691.882		2.07341	1026.44	661.939		2.07341	945.545	638.439
		2.18254	1112.49	622.289		2.18254	1479.29	749.696		2.18254	1169.99	731.821		2.18254	1067.89	736.349		2.18254	958.34	629.972
		2.29167	1121.94	630.422		2.29167	1423.24	706.571		2.29167	1202.38	761.295		2.29167	1050.62	773.953		2.29167	944.062	613.203
		2.40079	1100.12	651.649		2.40079	1423.23	680.85		2.40079	1203.79	840.954		2.40079	1042.64	850.221		2.40079	949.45	604.493
		2.50992	1101.97	664.035		2.50992	1424.24	650.152		2.50992	1295.49	939.02		2.50992	1036.06	857.617		2.50992	944.442	590.533
		2.61905	1121.53	667.523		2.61905	1479.31	629.154		2.61905	1334.36	1099.51		2.61905	987.174	870.877		2.61905	942.919	585.048
		2.72817	1148.63	689.401		2.72817	1487.99	662.775		2.72817	1338.98	1263.94		2.72817	943.551	859.397		2.72817	919.278	560.454
		2.8373	1115.05	690.331		2.8373	1500.69	675.911		2.8373	1355.74	1315.58		2.8373	936.35	799.705		2.8373	918.709	589.646
		2.94643	1105.99	685.2		2.94643	1451.71	685.048		2.94643	1315.1	1270.7		2.94643	938.53	744.492		2.94643	892.596	571.915
		3.05556	1129.62	681.532		3.05556	1347.12	687.297		3.05556	1252.84	1140.37		3.05556	928.391	727.652		3.05556	883.556	547.966
		3.16468	1119.61	683.46		3.16468	1245.09	638.682		3.16468	1156.98	998.993		3.16468	918.526	664.98		3.16468	887.225	540.719
		3.27381	1108.63	657.028		3.27381	1166.82	617.791		3.27381	1081.32	898.284		3.27381	910.536	628.862		3.27381	925.086	547.817
		3.38294	1088.46	654.773		3.38294	1144.14	588.023		3.38294	1049.35	789.869		3.38294	921.958	609.071		3.38294	877.44	559.439
		3.49206	1133.64	662.592		3.49206	1110.99	586.575		3.49206	1040.35	757.949		3.49206	957.388	606.379		3.49206	885.793	594.408
		3.60119	1129.66	684.445		3.60119	1096.52	580.48		3.60119	1018.04	753.693		3.60119	936.024	622.296		3.60119	922.201	680.606
		3.71032	1143.85	716.37		3.71032	1089.38	588.864		3.71032	997.014	805.802		3.71032	924.214	639.855		3.71032	957.883	745.336
		3.81944	1173.02	745.953		3.81944	1114.62	621.829		3.81944	1032.72	932.716		3.81944	946.941	639.661		3.81944	1031.59	833.335
		3.92857	1177.56	747.182		3.92857	1121.34	644.86		3.92857	1144.39	1091.85		3.92857	985.9	645.578		3.92857	1061.95	837.486
		4.0377	1215.89	701.004		4.0377	1159.83	661.692		4.0377	1287.71	1229.01		4.0377	984.156	640.591		4.0377	1125.26	831.443
		4.14683	1222.12	715.294		4.14683	1150.11	678.222		4.14683	1352.35	1250.93		4.14683	1015.7	638.856		4.14683	1083.05	806.18
		4.25595	1219.41	674.519		4.25595	1184.47	711.596		4.25595	1378.25	1251.65		4.25595	1017.63	634.051		4.25595	1043.62	797.559
		4.36508	1211.82	660.719		4.36508	1183.42	713.545		4.36508	1302.99	1226.62		4.36508	1005.86	622.567		4.36508	1027.82	806.15
		4.47421	1191.85	654.739		4.47421	1211.31	698.32		4.47421	1283.72	1179.57		4.47421	991.485	658.483		4.47421	1037.5	816.255
		4.58333	1165.28	669.697		4.58333	1222.61	660.497		4.58333	1263.59	1038.58		4.58333	965.353	664.719		4.58333	983.281	834.988
		4.69246	1167.47	673.764		4.69246	1261.78	641.813		4.69246	1239.81	918.924		4.69246	969.954	691.1		4.69246	1013.88	826.453
		4.80159	1174.75	688.33		4.80159	1269.37	648.901		4.80159	1165.61	799.862		4.80159	964.025	699.175		4.80159	985.086	801.021
		4.91071	1167.04	676.375		4.91071	1247.42	633.63		4.91071	1134.69	748.959		4.91071	928.328	711.529		4.91071	990.173	793.906
		5.01984	1164.67	693.488		5.01984	1196.85	655.799		5.01984	1091.14	700.393		5.01984	910.237	781.777		5.01984	947.728	792.986
		5.12897	1161.92	690.594		5.12897	1166.28	674.469		5.12897	1048.75	676.353		5.12897	922.886	800.81		5.12897	944.182	886.734
		5.2381	1159.28	689.471		5.2381	1147.3	701.553		5.2381	1020.79	633.509		5.2381	921.745	832.446		5.2381	931.523	829.859
		5.34722	1200.71	717.298		5.34722	1163.71	738.325		5.34722	1002.22	617.199		5.34722	937.777	806.402		5.34722	911.857	797.63
		5.45635	1222.27	715.87		5.45635	1149.15	743.516		5.45635	1009.72	630.281		5.45635	909.32	820.424		5.45635	908.154	690.695
		5.56548	1286.43	729.303		5.56548	1166.25	708.091		5.56548	985.817	626.937		5.56548	924.591	800.249		5.56548	940.491	628.183
		5.6746	1297.79	749.074		5.6746	1222.59	703.727		5.6746	986.212	631.047		5.6746	962.877	729.013		5.6746	920.144	608.026
		5.78373	1249.12	746.444		5.78373	1236.32	678.354		5.78373	980.678	651.487		5.78373	947.482	701.463		5.78373	933.265	602.717
		5.89286	1165.18	713.227		5.89286	1199.08	669.001		5.89286	988.069	650.698		5.89286	937.411	678.347		5.89286	944.125	589.659
		6.00198	1144.17	688.628		6.00198	1128.02	655.221		6.00198	992.809	674.306		6.00198	953.59	653.278		6.00198	928.193	559.386
		6.11111	1084.56	648.555		6.11111	1097.97	688.05		6.11111	977.707	703.771		6.11111	942.386	650.257		6.11111	930.091	581.205
		6.22024	1103.39	625.229		6.22024	1091.84	667.148		6.22024	970.9	690.017		6.22024	953.854	648.48		6.22024	924.951	544.067
		6.32937	1093.15	609.561		6.32937	1113.52	695.402		6.32937	975.472	679.825		6.32937	931.962	647.45		6.32937	904.28	560.819
		6.43849	1107.21	590.953		6.43849	1053.38	685.795		6.43849	978.726	650.006		6.43849	945.804	631.806		6.43849	893.398	564.052
		6.54762	1117.67	573.703		6.54762	1096.81	660.185		6.54762	1001.1	632.689		6.54762	905.314	639.882		6.54762	880.726	533.964
		6.65675	1104.11	562.454		6.65675	1096.98	682.383		6.65675	982.083	621.553		6.65675	946.055	651.153		6.65675	862.055	547.787
		6.76587	1093.56	543.466		6.76587	1104.94	672.214		6.76587	1005.91	619.338		6.76587	886.797	642.205
		6.875	1078.14	569.426		6.875	1067.16	730.205		6.875	982.365	635.675		6.875	929.041	613.759
		6.98413	1069.81	574.292		6.98413	1084.34	800.421		6.98413	969.198	641.234		6.98413	946.964	621.417
		7.09325	1078.75	570.783		7.09325	1108.72	855.575		7.09325	957.443	680.651
		7.20238	1065.03	579.626		7.20238	1087.84	871.847
						7.31151	1081.86	819.779
individual	min		1031.35	543.466			1053.38	580.48			950.745	612.424			885.04	528.825			854.742	533.964
individual	max		1297.79	749.074			1568.05	871.847			1378.25	1315.58			1067.89	870.877			1125.26	886.734
overall	min		854.742	528.825
overall	max		1568.05	1315.58
overall	min		854.742	528.825			854.742	528.825			854.742	528.825			854.742	528.825			854.742	528.825
overall	max		1568.05	1315.58			1568.05	1315.58			1568.05	1315.58			1568.05	1315.58			1568.05	1315.58
		t1				t2				t3				t4				t5
			Rab5	Snx1			Rab5	Snx1			Rab5	Snx1			Rab5	Snx1			Rab5	Snx1
		0	0.133627	0.237301		0	0.0875888	0.642904		0	0.00312745	0.264601		0	0.419435	0.3295		0	0.0269	0.0316155
		0.10913	0.193251	0.37091		0.10913	0.12158	0.390906		0.10913	0	0.386123		0.10913	0.615638	0.324556		0.10913	0.115252	0.0788644
		0.21825	0.195841	0.331631		0.21825	0.244265	0.377764		0.21825	0.015022	0.478626		0.21825	0.660233	0.325775		0.21825	0.123037	0.0601553
		0.32738	0.110953	0.332623		0.32738	0.323666	0.402238		0.32738	0.0548251	0.493248		0.32738	0.49773	0.277467		0.32738	0	0.152995
		0.43651	0.0183796	0.328786		0.43651	0.237041	0.503489		0.43651	0.149755	0.446872		0.43651	0.202613	0.216102		0.43651	0.102543	0.249429
		0.54563	0	0.283846		0.54563	0.122983	0.590431		0.54563	0.238032	0.415098		0.54563	0.0515352	0.137938		0.54563	0.187387	0.287944
		0.65476	0.0744757	0.0959447		0.65476	0.0947974	0.743873		0.65476	0.256687	0.383846		0.65476	0.0959879	0.108846		0.65476	0.115001	0.439306
		0.76389	0.141039	0.170412		0.76389	0.235487	0.922369		0.76389	0.316892	0.299126		0.76389	0.124099	0.149352		0.76389	0.0693257	0.347008
		0.87302	0.0952874	0.101363		0.87302	0.373928	0.869364		0.87302	0.305426	0.160502		0.87302	0.0205583	0.102698		0.87302	0.0889583	0.236318
		0.98214	0.197946	0.200819		0.98214	0.553915	0.720946		0.98214	0.259927	0.090191		0.98214	0	0.0643528		0.98214	0.0351545	0.135955
		1.09127	0.224752	0.263784		1.09127	0.621071	0.52473		1.09127	0.277578	0.0767018		1.09127	0.0615764	0.0440606		1.09127	0.0595631	0.10593
		1.2004	0.21788	0.306617		1.2004	0.660461	0.381817		1.2004	0.201132	0.00878615		1.2004	0.0808823	0.0551729		1.2004	0.235624	0.107716
		1.30952	0.432479	0.446889		1.30952	0.680078	0.424568		1.30952	0.127229	0.029692		1.30952	0.143246	0.0544099		1.30952	0.290019	0.0878476
		1.41865	0.62147	0.557731		1.41865	0.548946	0.480511		1.41865	0.0764599	0.0531564		1.41865	0.224626	0		1.41865	0.361138	0.0826828
		1.52778	0.748367	0.633905		1.52778	0.536214	0.345242		1.52778	0.0635595	0.0145203		1.52778	0.307713	0.0507671		1.52778	0.3425	0.0540721
		1.6369	0.91077	0.680654		1.6369	0.667406	0.316477		1.6369	0.129217	0		1.6369	0.23132	0.109059		1.6369	0.327802	0.135836
		1.74603	0.70385	0.693898		1.74603	0.782045	0.534233		1.74603	0.217209	0.061732		1.74603	0.519765	0.152725		1.74603	0.373998	0.227176
		1.85516	0.56081	0.606888		1.85516	0.874423	0.587472		1.85516	0.259613	0.0626707		1.85516	0.7709	0.221142		1.85516	0.310809	0.224673
		1.96429	0.409855	0.588742		1.96429	0.949929	0.758487		1.96429	0.357839	0.103875		1.96429	0.728662	0.368985		1.96429	0.36957	0.272535
		2.07341	0.359201	0.517232		2.07341	1	0.689574		2.07341	0.476051	0.113003		2.07341	0.773317	0.389163		2.07341	0.335661	0.296156
		2.18254	0.304516	0.383365		2.18254	0.82755	0.580766		2.18254	0.512859	0.169803		2.18254	1	0.606703		2.18254	0.382959	0.272155
		2.29167	0.339992	0.422921		2.29167	0.718645	0.432757		2.29167	0.588622	0.21172		2.29167	0.905571	0.71664		2.29167	0.330179	0.224619
		2.40079	0.258111	0.526161		2.40079	0.718618	0.34448		2.40079	0.591909	0.325008		2.40079	0.861949	0.939612		2.40079	0.350096	0.199929
		2.50992	0.265047	0.586402		2.50992	0.720584	0.239121		2.50992	0.806414	0.464474		2.50992	0.825935	0.961234		2.50992	0.331584	0.160357
		2.61905	0.338442	0.603367		2.61905	0.827587	0.167054		2.61905	0.897339	0.692717		2.61905	0.558579	1		2.61905	0.325954	0.144808
		2.72817	0.440177	0.709773		2.72817	0.844447	0.282444		2.72817	0.908139	0.926571		2.72817	0.320002	0.966438		2.72817	0.238563	0.0750914
		2.8373	0.314132	0.714296		2.8373	0.869133	0.327529		2.8373	0.947355	1		2.8373	0.280619	0.791926		2.8373	0.236459	0.157842
		2.94643	0.280146	0.689341		2.94643	0.773949	0.358888		2.94643	0.852271	0.936184		2.94643	0.292541	0.630509		2.94643	0.139931	0.10758
		3.05556	0.368809	0.671501		3.05556	0.570737	0.366606		3.05556	0.706656	0.750833		3.05556	0.23709	0.581277		3.05556	0.106513	0.0396916
		3.16468	0.331254	0.680878		3.16468	0.372482	0.199755		3.16468	0.482413	0.549766		3.16468	0.183138	0.398054		3.16468	0.120076	0.0191485
		3.27381	0.29004	0.552323		3.27381	0.220413	0.128055		3.27381	0.30543	0.406541		3.27381	0.13944	0.292461		3.27381	0.260033	0.0392692
		3.38294	0.214329	0.541355		3.38294	0.17634	0.0258883		3.38294	0.230655	0.252357		3.38294	0.201908	0.234602		3.38294	0.0839051	0.0722142
		3.49206	0.38392	0.579384		3.49206	0.111931	0.0209186		3.49206	0.2096	0.206961		3.49206	0.395677	0.226732		3.49206	0.114783	0.171341
		3.60119	0.368978	0.685669		3.60119	0.0838214	0		3.60119	0.15742	0.200908		3.60119	0.278836	0.273265		3.60119	0.249368	0.415687
		3.71032	0.422221	0.84094		3.71032	0.0699366	0.0287747		3.71032	0.10823	0.275016		3.71032	0.214246	0.3246		3.71032	0.381269	0.599178
		3.81944	0.531726	0.984821		3.81944	0.118976	0.141914		3.81944	0.191747	0.455509		3.81944	0.338542	0.324033		3.81944	0.653726	0.848629
		3.92857	0.548736	0.990798		3.92857	0.132039	0.220958		3.92857	0.452961	0.681823		3.92857	0.551612	0.341331		3.92857	0.765969	0.860396
		4.0377	0.692628	0.766206		4.0377	0.206835	0.278728		4.0377	0.788206	0.876889		4.0377	0.542074	0.326751		4.0377	1	0.843266
		4.14683	0.716003	0.835707		4.14683	0.187934	0.33546		4.14683	0.939416	0.90806		4.14683	0.714579	0.321679		4.14683	0.843975	0.771653
		4.25595	0.705839	0.637393		4.25595	0.254707	0.450003		4.25595	1	0.909081		4.25595	0.725173	0.307632		4.25595	0.698218	0.747215
		4.36508	0.677333	0.570275		4.36508	0.252665	0.456692		4.36508	0.823965	0.873483		4.36508	0.660769	0.274058		4.36508	0.639783	0.771568
		4.47421	0.60237	0.54119		4.47421	0.306853	0.404438		4.47421	0.778889	0.806582		4.47421	0.582157	0.379059		4.47421	0.675595	0.800213
		4.58333	0.502669	0.61394		4.58333	0.328813	0.274626		4.58333	0.731795	0.606068		4.58333	0.439238	0.39729		4.58333	0.475155	0.853315
		4.69246	0.510899	0.63372		4.69246	0.404927	0.210501		4.69246	0.676161	0.435894		4.69246	0.464402	0.474416		4.69246	0.588256	0.829121
		4.80159	0.538201	0.704564		4.80159	0.419662	0.234828		4.80159	0.502612	0.266568		4.80159	0.431976	0.498024		4.80159	0.481828	0.757029
		4.91071	0.509252	0.646419		4.91071	0.377023	0.182416		4.91071	0.430283	0.194176		4.91071	0.236746	0.534141		4.91071	0.500632	0.73686
		5.01984	0.500364	0.729651		5.01984	0.278759	0.258502		5.01984	0.328406	0.125107		5.01984	0.137804	0.739513		5.01984	0.343731	0.734252
		5.12897	0.490046	0.715575		5.12897	0.219362	0.322579		5.12897	0.229246	0.0909178		5.12897	0.206983	0.795157		5.12897	0.330623	1
		5.2381	0.480127	0.710113		5.2381	0.182478	0.415534		5.2381	0.163848	0.0299864		5.2381	0.200743	0.887646		5.2381	0.283827	0.838776
		5.34722	0.635639	0.845453		5.34722	0.21436	0.541739		5.34722	0.120396	0.00679085		5.34722	0.288423	0.811505		5.34722	0.21113	0.747416
		5.45635	0.716551	0.838508		5.45635	0.186078	0.559555		5.45635	0.137959	0.0253956		5.45635	0.132789	0.852499		5.45635	0.197442	0.444287
		5.56548	0.957386	0.903841		5.56548	0.219301	0.437973		5.56548	0.0820388	0.0206399		5.56548	0.216308	0.793517		5.56548	0.316978	0.267083
		5.6746	1	1		5.6746	0.328778	0.422996		5.6746	0.0829628	0.026485		5.6746	0.425697	0.585256		5.6746	0.241764	0.209944
		5.78373	0.817314	0.987209		5.78373	0.355448	0.335913		5.78373	0.0700179	0.0555541		5.78373	0.3415	0.504713		5.78373	0.290267	0.194895
		5.89286	0.502286	0.825654		5.89286	0.283092	0.303813		5.89286	0.0873066	0.054432		5.89286	0.286421	0.437132		5.89286	0.330412	0.157879
		6.00198	0.423445	0.706013		6.00198	0.14502	0.256518		6.00198	0.0983942	0.0880066		6.00198	0.374906	0.363842		6.00198	0.271518	0.072064
		6.11111	0.19968	0.511113		6.11111	0.0866407	0.369191		6.11111	0.0630683	0.129911		6.11111	0.31363	0.35501		6.11111	0.278534	0.133914
		6.22024	0.27038	0.397664		6.22024	0.0747203	0.297453		6.22024	0.0471456	0.11035		6.22024	0.376349	0.349815		6.22024	0.259533	0.0286391
		6.32937	0.231936	0.321461		6.32937	0.116854	0.394424		6.32937	0.0578403	0.0958555		6.32937	0.25662	0.346804		6.32937	0.183121	0.0761261
		6.43849	0.284714	0.230959		6.43849	0	0.361451		6.43849	0.0654519	0.0534479		6.43849	0.332323	0.301068		6.43849	0.142895	0.0852907
		6.54762	0.323976	0.147061		6.54762	0.0843732	0.273555		6.54762	0.11779	0.0288202		6.54762	0.11088	0.324679		6.54762	0.096052	0
		6.65675	0.273071	0.0923505		6.65675	0.0847112	0.349741		6.65675	0.0733044	0.012983		6.65675	0.333696	0.35763		6.65675	0.0270331	0.0391842
		6.76587	0.233459	0		6.76587	0.100187	0.31484		6.76587	0.129042	0.00983287		6.76587	0.00960918	0.33147
		6.875	0.175592	0.12626		6.875	0.0267727	0.513871		6.875	0.073964	0.0330668		6.875	0.240645	0.248307
		6.98413	0.144327	0.149926		6.98413	0.0601439	0.754859		6.98413	0.0431644	0.0409726		6.98413	0.338668	0.270696
		7.09325	0.177908	0.13286		7.09325	0.10752	0.944153		7.09325	0.0156677	0.0970302
		7.20238	0.126398	0.175869		7.20238	0.0669463	1
						7.31151	0.0553388	0.821298

## Sheet: exp1-endosome2
endosome 2			t1				t2				t3				t4				t5				t6
line profiles				Rab5	Snx1			Rab5	Snx1			Rab5	Snx1			Rab5	Snx1			Rab5	Snx1			Rab5	Snx1
			0	1061.06	625.45		0	1550.23	786.919		0	1318.62	701.129		0	1070.39	527.227		0	1105.42	611.377		0	1324.97	812.078
			0.10913	1031.29	584.988		0.10913	1519.31	760.066		0.10913	1308.29	674.62		0.10913	1048.46	533.252		0.10913	1089.76	577.392		0.10913	1309.67	699.012
			0.21825	1023.33	560.895		0.21825	1389.62	780.551		0.21825	1300.67	632.966		0.21825	1044.56	509.747		0.21825	1118.54	554.741		0.21825	1266.33	607.19
			0.32738	1033.3	573.728		0.32738	1250.79	795.874		0.32738	1320.22	625.518		0.32738	1031.7	511.752		0.32738	1094.69	596.668		0.32738	1248.87	554.48
			0.43651	985.541	565.953		0.43651	1200.96	861.451		0.43651	1315.06	619.993		0.43651	1057.65	504.943		0.43651	1138.35	608.496		0.43651	1178.82	528.773
			0.54563	998.759	537.477		0.54563	1197.6	947.888		0.54563	1350.87	600.059		0.54563	1021.02	473.265		0.54563	1114.84	618.034		0.54563	1187.07	513.558
			0.65476	999.865	527.765		0.65476	1218.38	936.01		0.65476	1368.39	603.436		0.65476	1012.18	466.594		0.65476	1064.29	605.802		0.65476	1116.06	523.215
			0.76389	989.261	511.09		0.76389	1222.97	893.48		0.76389	1410.18	598.306		0.76389	1041.49	484.231		0.76389	1068.12	601.911		0.76389	1112.41	528.103
			0.87302	1014.74	498.821		0.87302	1234.56	822.083		0.87302	1430.44	581.943		0.87302	1061.28	494.903		0.87302	1068.45	574.472		0.87302	1075.36	537.945
			0.98214	1031.22	484.295		0.98214	1253.29	774.589		0.98214	1443.07	616.712		0.98214	1048.89	524.995		0.98214	1027.6	569.023		0.98214	1058.39	526.253
			1.09127	1014.15	485.094		1.09127	1250.25	721.444		1.09127	1406	622.222		1.09127	1041.5	562.747		1.09127	1026.97	577.199		1.09127	1014.83	541.241
			1.2004	1027.8	493.505		1.2004	1254.69	684.653		1.2004	1344.79	632.789		1.2004	1071.37	609.966		1.2004	1032.57	579.172		1.2004	1000.5	545.688
			1.30952	1012.95	494.379		1.30952	1238.32	676.462		1.30952	1220.28	644.654		1.30952	1078.62	654.01		1.30952	1036.23	585		1.30952	1031.48	560.247
			1.41865	954.26	479.417		1.41865	1204.67	660.442		1.41865	1161.26	648.399		1.41865	1095.31	686.55		1.41865	1059.75	592.787		1.41865	1002.98	566.093
			1.52778	975.729	486.555		1.52778	1164.89	642.693		1.52778	1166.61	661.766		1.52778	1105.21	737.424		1.52778	1060.72	616.954		1.52778	976.166	577.987
			1.6369	954.098	481.76		1.6369	1109.25	633.641		1.6369	1160.38	712.319		1.6369	1129.5	841.411		1.6369	1083.07	631.912		1.6369	991.098	623.794
			1.74603	939.645	501.902		1.74603	1104.37	599.14		1.74603	1160.29	750.535		1.74603	1160.09	941.289		1.74603	1146.28	658.374		1.74603	1017.5	641.666
			1.85516	952.44	498.437		1.85516	1114.18	598.064		1.85516	1170.99	830.036		1.85516	1189.14	970.725		1.85516	1130.28	715.765		1.85516	1024.56	657.781
			1.96429	973.603	507.194		1.96429	1106.07	600.544		1.96429	1149.71	908.418		1.96429	1232.39	969.323		1.96429	1149.19	753.822		1.96429	1062.62	695.75
			2.07341	997.5	527.531		2.07341	1108.31	647.974		2.07341	1198.68	1006.91		2.07341	1292.95	980.472		2.07341	1197.61	822.935		2.07341	1094.92	736.655
			2.18254	1059.11	513.898		2.18254	1122.19	723.621		2.18254	1221.57	1061.77		2.18254	1315.87	956.047		2.18254	1199.08	892.07		2.18254	1130.46	772.903
			2.29167	1069.17	546.291		2.29167	1099.77	825.507		2.29167	1179.1	1150.97		2.29167	1366.24	905.255		2.29167	1202.62	920.106		2.29167	1156.28	823.361
			2.40079	1064.06	525.422		2.40079	1138.86	844.876		2.40079	1188.58	1198.6		2.40079	1441	862.597		2.40079	1258.46	964.04		2.40079	1154.29	838.719
			2.50992	1064.42	538.8		2.50992	1162.65	772.41		2.50992	1272.79	1173.04		2.50992	1458.45	860.625		2.50992	1281.23	929.059		2.50992	1218.17	806.727
			2.61905	1101.96	569.85		2.61905	1213.36	736.49		2.61905	1220.98	1109.67		2.61905	1437.52	840.385		2.61905	1344.03	886.854		2.61905	1228.16	780.669
			2.72817	1056.55	572.347		2.72817	1228.29	701.458		2.72817	1226.66	1109.61		2.72817	1330.5	815.379		2.72817	1384.67	852.869		2.72817	1243.01	716.881
			2.8373	1021.87	553.358		2.8373	1211.1	650.758		2.8373	1260.42	1020.72		2.8373	1291.48	758.048		2.8373	1404.38	826.551		2.8373	1300.29	699.073
			2.94643	1018.37	575.08		2.94643	1224.8	631.945		2.94643	1293.91	966.729		2.94643	1234.48	746.82		2.94643	1406.08	809.027		2.94643	1277.21	676.821
			3.05556	1027.46	582.731		3.05556	1243.79	647.816		3.05556	1328.31	953.521		3.05556	1140.33	709.693		3.05556	1389.56	780.165		3.05556	1293.77	669.089
			3.16468	1027.05	609.564		3.16468	1289.68	672.137		3.16468	1348.46	934.633		3.16468	1077.19	699.792		3.16468	1291.81	702.606		3.16468	1346.32	693.236
			3.27381	1034.26	591.845		3.27381	1305.7	676.375		3.27381	1390.42	991.605		3.27381	1043.87	674.555		3.27381	1240.3	664.102		3.27381	1424.67	752.654
			3.38294	1014.42	603.915		3.38294	1347.32	687.947		3.38294	1429.24	1059.17		3.38294	1034.09	618.116		3.38294	1201.31	626.229		3.38294	1419.96	818.16
			3.49206	1079.97	623.672		3.49206	1437.34	696.7		3.49206	1527.2	1186.79		3.49206	1016.41	625.56		3.49206	1147.67	644.945		3.49206	1429.81	890.116
			3.60119	1030.11	609.717		3.60119	1487.88	681.472		3.60119	1629.71	1293.8		3.60119	1026.59	597.265		3.60119	1131.47	630.195		3.60119	1419.22	974.087
			3.71032	1019.62	621.529		3.71032	1492.16	666.234		3.71032	1687.4	1333.33		3.71032	1054.14	568.176		3.71032	1094.3	627.004		3.71032	1395.77	992.291
			3.81944	1025.31	647.694		3.81944	1505.29	660.596		3.81944	1647.7	1301.78		3.81944	1070.51	562.567		3.81944	1114.28	645.838		3.81944	1417.25	929.166
			3.92857	1054.71	657.031		3.92857	1471.42	664.897		3.92857	1518.21	1190.12						3.92857	1101.43	628.319		3.92857	1390.88	885.803
			4.0377	1092.68	657.272		4.0377	1464.69	694.744		4.0377	1423.25	998.32						4.0377	1122.66	598.091		4.0377	1376.05	837.743
			4.14683	1074.11	637.999		4.14683	1463.97	717.771		4.14683	1375.44	850.795
			4.25595	1066.48	619.712		4.25595	1448.43	726.666		4.25595	1354.25	775.939
			4.36508	1079.81	614.568		4.36508	1540.37	790.25		4.36508	1324.13	719.822
			4.47421	1040.74	629.545		4.47421	1521.22	780.145
			4.58333	1076.98	644.907		4.58333	1530.68	797.351
			4.69246	1088.5	655.709
			4.80159	1083.14	682.623
			4.91071	1045.5	647.955
individual	min			939.645	479.417			1099.77	598.064			1149.71	581.943			1012.18	466.594			1026.97	554.741			976.166	513.558
individual	max			1101.96	682.623			1550.23	947.888			1687.4	1333.33			1458.45	980.472			1406.08	964.04			1429.81	992.291
overall	min			939.645	466.594
overall	max			1687.4	1333.33
overall	min			939.645	466.594			939.645	466.594			939.645	466.594			939.645	466.594			939.645	466.594			939.645	466.594
overall	max			1687.4	1333.33			1687.4	1333.33			1687.4	1333.33			1687.4	1333.33			1687.4	1333.33			1687.4	1333.33
			t1				t2				t3				t4				t5				t6
				Rab5	Snx1			Rab5	Snx1			Rab5	Snx1			Rab5	Snx1			Rab5	Snx1			Rab5	Snx1
			0	0.747998	0.718645		0	1	0.539857		0	0.314142	0.158621		0	0.130442	0.117991		0	0.206945	0.138373		0	0.7689	0.623563
			0.10913	0.564596	0.519527		0.10913	0.931353	0.463096		0.10913	0.294923	0.123341		0.10913	0.0812918	0.129716		0.10913	0.165641	0.055341		0.10913	0.735178	0.387385
			0.21825	0.515538	0.400963		0.21825	0.643445	0.521654		0.21825	0.280752	0.0679049		0.21825	0.0725549	0.0839752		0.21825	0.24155	0		0.21825	0.639628	0.195583
			0.32738	0.576973	0.464115		0.32738	0.335253	0.565456		0.32738	0.31711	0.0579926		0.32738	0.0437472	0.0878769		0.32738	0.178645	0.102436		0.32738	0.60114	0.0854798
			0.43651	0.282757	0.425854		0.43651	0.224629	0.752913		0.43651	0.307519	0.0506395		0.43651	0.101896	0.0746267		0.43651	0.293812	0.131334		0.43651	0.446733	0.0317818
			0.54563	0.364191	0.28572		0.54563	0.217163	1		0.54563	0.374113	0.02411		0.54563	0.0198087	0.0129817		0.54563	0.231782	0.154638		0.54563	0.464913	0
			0.65476	0.371005	0.237926		0.65476	0.2633	0.966046		0.65476	0.4067	0.0286044		0.65476	0	0		0.65476	0.0984516	0.124752		0.65476	0.30839	0.020172
			0.76389	0.305675	0.155866		0.76389	0.273494	0.84447		0.76389	0.484422	0.021777		0.76389	0.0656891	0.0343214		0.76389	0.108557	0.115246		0.76389	0.300337	0.0303823
			0.87302	0.462672	0.0954893		0.87302	0.299228	0.640376		0.87302	0.522109	0		0.87302	0.110017	0.055089		0.87302	0.10943	0.0482068		0.87302	0.218654	0.0509407
			0.98214	0.564202	0.0240052		0.98214	0.340803	0.504611		0.98214	0.545598	0.046273		0.98214	0.0822688	0.113648		0.98214	0.00167234	0.0348938		0.98214	0.181258	0.0265179
			1.09127	0.459037	0.0279372		1.09127	0.334052	0.352692		1.09127	0.476658	0.0536061		1.09127	0.0657137	0.187113		1.09127	0	0.0548694		1.09127	0.0852394	0.0578256
			1.2004	0.543113	0.0693287		1.2004	0.343902	0.247522		1.2004	0.362811	0.0676693		1.2004	0.132629	0.279		1.2004	0.0147688	0.0596899		1.2004	0.0536527	0.0671147
			1.30952	0.451625	0.0736297		1.30952	0.307557	0.224107		1.30952	0.131249	0.0834601		1.30952	0.148883	0.364709		1.30952	0.0244309	0.0739288		1.30952	0.12194	0.0975262
			1.41865	0.0900404	0		1.41865	0.232876	0.178313		1.41865	0.0214824	0.0884442		1.41865	0.186282	0.428032		1.41865	0.0864815	0.0929541		1.41865	0.0591041	0.109738
			1.52778	0.222307	0.0351269		1.52778	0.14456	0.127576		1.52778	0.0314341	0.106234		1.52778	0.208459	0.527032		1.52778	0.0890428	0.151999		1.52778	0	0.134582
			1.6369	0.0890424	0.0115302		1.6369	0.0210428	0.1017		1.6369	0.0198495	0.173513		1.6369	0.262904	0.729389		1.6369	0.147994	0.188544		1.6369	0.032916	0.230266
			1.74603	0	0.110651		1.74603	0.0102028	0.00307583		1.74603	0.0196728	0.224374		1.74603	0.331441	0.92375		1.74603	0.314732	0.253196		1.74603	0.0911251	0.267598
			1.85516	0.0788277	0.0935996		1.85516	0.0319782	0		1.85516	0.0395744	0.330179		1.85516	0.39653	0.981032		1.85516	0.272517	0.393414		1.85516	0.106688	0.30126
			1.96429	0.209209	0.136694		1.96429	0.0139723	0.00708928		1.96429	0	0.434495		1.96429	0.493451	0.978304		1.96429	0.322397	0.486395		1.96429	0.190567	0.380571
			2.07341	0.356434	0.236775		2.07341	0.0189627	0.142672		2.07341	0.0910886	0.56557		2.07341	0.629163	1		2.07341	0.45012	0.655252		2.07341	0.261774	0.466016
			2.18254	0.735972	0.169685		2.18254	0.0497732	0.358915		2.18254	0.133642	0.63858		2.18254	0.680518	0.952469		2.18254	0.453998	0.824163		2.18254	0.340131	0.541732
			2.29167	0.797993	0.329095		2.29167	0	0.650164		2.29167	0.0546684	0.757296		2.29167	0.793394	0.853629		2.29167	0.463319	0.89266		2.29167	0.397042	0.647131
			2.40079	0.766493	0.226396		2.40079	0.0867618	0.705532		2.40079	0.0722974	0.820687		2.40079	0.960907	0.770617		2.40079	0.610638	1		2.40079	0.392646	0.679212
			2.50992	0.768704	0.292231		2.50992	0.139587	0.498382		2.50992	0.228906	0.786666		2.50992	1	0.766779		2.50992	0.670684	0.914534		2.50992	0.533463	0.612385
			2.61905	1	0.445031		2.61905	0.252147	0.395702		2.61905	0.132562	0.702335		2.61905	0.953096	0.727392		2.61905	0.836343	0.811419		2.61905	0.555485	0.557954
			2.72817	0.720243	0.457319		2.72817	0.285291	0.29556		2.72817	0.143125	0.702261		2.72817	0.713298	0.678731		2.72817	0.943531	0.728387		2.72817	0.588226	0.424711
			2.8373	0.506592	0.363872		2.8373	0.247139	0.15063		2.8373	0.205895	0.583948		2.8373	0.625871	0.567166		2.8373	0.995518	0.664087		2.8373	0.714489	0.387512
			2.94643	0.484998	0.470769		2.94643	0.277548	0.0968516		2.94643	0.268183	0.5121		2.94643	0.498146	0.545316		2.94643	1	0.621272		2.94643	0.663621	0.341031
			3.05556	0.540994	0.50842		3.05556	0.31972	0.14222		3.05556	0.332164	0.494521		3.05556	0.287159	0.473068		3.05556	0.956437	0.550756		3.05556	0.700132	0.32488
			3.16468	0.538456	0.640468		3.16468	0.421588	0.211744		3.16468	0.369638	0.469384		3.16468	0.14569	0.4538		3.16468	0.698591	0.361264		3.16468	0.815962	0.37532
			3.27381	0.582875	0.553271		3.27381	0.457154	0.223858		3.27381	0.447682	0.545206		3.27381	0.0710155	0.404689		3.27381	0.562713	0.267191		3.27381	0.988683	0.499435
			3.38294	0.4607	0.612669		3.38294	0.549546	0.256938		3.38294	0.519879	0.635129		3.38294	0.0491049	0.29486		3.38294	0.459877	0.17466		3.38294	0.978293	0.636267
			3.49206	0.864505	0.709895		3.49206	0.749371	0.281959		3.49206	0.702057	0.804976		3.49206	0.00948755	0.309346		3.49206	0.318385	0.220387		3.49206	1	0.786572
			3.60119	0.55732	0.641221		3.60119	0.861574	0.238428		3.60119	0.892709	0.947385		3.60119	0.0322967	0.254284		3.60119	0.275669	0.184349		3.60119	0.976658	0.961975
			3.71032	0.492724	0.699349		3.71032	0.871075	0.194869		3.71032	1	1		3.71032	0.0940262	0.197677		3.71032	0.177616	0.176553		3.71032	0.924971	1
			3.81944	0.527773	0.82811		3.81944	0.900216	0.178753		3.81944	0.926155	0.958011		3.81944	0.130713	0.186762		3.81944	0.230316	0.222568		3.81944	0.972322	0.868142
			3.92857	0.708895	0.874059		3.92857	0.825044	0.191047		3.92857	0.685339	0.80941						3.92857	0.196421	0.179766		3.92857	0.914198	0.777563
			4.0377	0.942828	0.875245		4.0377	0.810106	0.276368		4.0377	0.508728	0.554143						4.0377	0.25241	0.105913		4.0377	0.881503	0.677173
			4.14683	0.82844	0.7804		4.14683	0.808495	0.342192		4.14683	0.419808	0.357807
			4.25595	0.78142	0.690408		4.25595	0.774001	0.367619		4.25595	0.38041	0.258183
			4.36508	0.86355	0.665094		4.36508	0.978105	0.549379		4.36508	0.324386	0.183499
			4.47421	0.622847	0.738797		4.47421	0.9356	0.520493
			4.58333	0.846109	0.814395		4.58333	0.956587	0.569678
			4.69246	0.917075	0.867553
			4.80159	0.884041	1
			4.91071	0.652148	0.829395

## Sheet: exp1-endosome3
endosome 3		t1				t2				t3				t4
line profiles			Rab5	Snx1			Rab5	Snx1			Rab5	Snx1			Rab5	Snx1
		0	627.793	596.531		0	673.865	574.106		0	705.584	562.963		0	650.438	611.586
		0.10913	653.855	573.668		0.10913	689.425	592.128		0.10913	682.639	567.252		0.10913	652.151	615.088
		0.21825	645.969	575.492		0.21825	680.12	631.568		0.21825	651.027	590.36		0.21825	659.062	622.118
		0.32738	647.792	577.99		0.32738	667.447	640.39		0.32738	700.41	608.036		0.32738	663.715	637.759
		0.43651	620.34	555.368		0.43651	658.252	688.278		0.43651	685.984	631.866		0.43651	657.461	610.331
		0.54563	611.206	557.85		0.54563	648.026	685.393		0.54563	654.791	641.592		0.54563	627.859	596.358
		0.65476	635.388	575.189		0.65476	635.466	747.718		0.65476	667.574	626.364		0.65476	601.767	592.77
		0.76389	621.22	595.565		0.76389	610.791	723.778		0.76389	656.43	618.411		0.76389	611.578	573.098
		0.87302	652.227	597.324		0.87302	569.613	709.193		0.87302	648.161	608.732		0.87302	613.781	578.261
		0.98214	655.081	670.809		0.98214	573.603	688.033		0.98214	662.379	595.397		0.98214	652.069	583.96
		1.09127	682.737	728.501		1.09127	546.755	658.017		1.09127	672.323	585.648		1.09127	731.371	577.406
		1.2004	676.343	799.862		1.2004	554.147	651.917		1.2004	686.932	602.133		1.2004	882.293	580.356
		1.30952	716.45	786.994		1.30952	561.608	604.824		1.30952	663.173	590.081		1.30952	1059.63	597.99
		1.41865	695.631	714.398		1.41865	553.285	574.739		1.41865	647.72	598.662		1.41865	1142.77	613.632
		1.52778	651.215	631.818		1.52778	525.875	531.469		1.52778	623.264	591.864		1.52778	1037.58	608.924
		1.6369	611.492	561.712		1.6369	533.915	535.004		1.6369	603.407	579.617		1.6369	903.72	593.104
		1.74603	602.058	516.467		1.74603	529.706	511.787		1.74603	571.758	586.201		1.74603	774.247	582.744
		1.85516	563.377	492.863		1.85516	523.507	511.649		1.85516	568.622	591.903		1.85516	756.687	583.2
		1.96429	534.065	475.159		1.96429	511.648	474.02		1.96429	561.156	569.561		1.96429	745.93	579.179
		2.07341	523.746	465.903		2.07341	496.712	453.973		2.07341	537.105	544.998		2.07341	755.832	613.422
		2.18254	524.694	449.485		2.18254	486.989	452.025		2.18254	563.188	598.78		2.18254	737.302	680.863
		2.29167	527.183	454.877		2.29167	481.681	461.144		2.29167	561.218	594.933		2.29167	696.081	789.95
		2.40079	521.369	471.097		2.40079	486.53	488.527		2.40079	550.979	637.495		2.40079	674.386	937.198
		2.50992	496.911	492.174		2.50992	495.914	491.868		2.50992	556.362	647.903		2.50992	644.224	1034.01
		2.61905	506.453	510.255		2.61905	478.244	521.678		2.61905	567.255	659.024		2.61905	619.952	1133.87
		2.72817	505.119	530.514		2.72817	525.938	505.221		2.72817	552.424	651.24		2.72817	597.334	1211.52
		2.8373	514.983	507.191		2.8373	514.146	529.851		2.8373	575.535	646.372		2.8373	614.256	1162.37
		2.94643	514.055	487.577		2.94643	511.819	513.315		2.94643	576.982	621.741		2.94643	623.426	1090.08
		3.05556	524.989	486.177		3.05556	527.624	524.358		3.05556	609.815	622.812		3.05556	619.657	984.795
		3.16468	541.227	465.594		3.16468	553.844	517.669		3.16468	619.895	593.758		3.16468	654.016	875.452
		3.27381	556.753	459.88		3.27381	581.738	513.784		3.27381	621.99	599.36		3.27381	653.757	795.809
		3.38294	586.212	459.346		3.38294	587.42	499.835		3.38294	634.719	577.92		3.38294	656.253	740.098
		3.49206	583.7	443.305		3.49206	605.35	504.447		3.49206	629.974	574.115		3.49206	650.515	651.158
		3.60119	593.156	451.903		3.60119	597.247	494.697		3.60119	648.479	557.607		3.60119	653.255	600.711
		3.71032	588.057	445.165		3.71032	608.789	490.106		3.71032	662.616	538.333		3.71032	643.512	571.427
		3.81944	615.461	453.002		3.81944	605.982	501.085		3.81944	669.703	541.238		3.81944	637.271	577.458
		3.92857	603.328	462.35		3.92857	588.485	492.762		3.92857	665.984	531.458		3.92857	650.093	567.071
		4.0377	604.443	470.441		4.0377	593.682	506.788		4.0377	685.215	551.822		4.0377	644.718	574.233
		4.14683	595.844	490.008		4.14683	585.619	509.608		4.14683	710.157	549.693		4.14683	646.251	583.057
		4.25595	617.792	498.445		4.25595	582.069	530.175		4.25595	701.938	551.54		4.25595	648.716	593.129
		4.36508	619.864	529.528		4.36508	594.553	565.109		4.36508	696.941	560.324		4.36508	643.459	616.286
		4.47421	612.71	552.908		4.47421	622.865	577.885
		4.58333	621.509	572.462		4.58333	656.057	577.199
individual	min		496.911	443.305			478.244	452.025			537.105	531.458			597.334	567.071
individual	max		716.45	799.862			689.425	747.718			710.157	659.024			1142.77	1211.52
overall	min		478.244	443.305
overall	max		1142.77	1211.52
overall	min		478.244	443.305			478.244	443.305			478.244	443.305			478.244	443.305
overall	max		1142.77	1211.52			1142.77	1211.52			1142.77	1211.52			1142.77	1211.52
		t1				t2				t3				t4
			Rab5	Snx1			Rab5	Snx1			Rab5	Snx1			Rab5	Snx1
		0	0.596167	0.429738		0	0.926319	0.412864		0	0.973574	0.24697		0	0.0973606	0.0690747
		0.10913	0.71488	0.365616		0.10913	1	0.473812		0.10913	0.840984	0.280592		0.10913	0.100501	0.0745088
		0.21825	0.678959	0.370732		0.21825	0.955938	0.607194		0.21825	0.658311	0.461737		0.21825	0.113172	0.0854174
		0.32738	0.687263	0.377738		0.32738	0.895928	0.637029		0.32738	0.943676	0.600301		0.32738	0.121703	0.109688
		0.43651	0.562219	0.314292		0.43651	0.852387	0.798981		0.43651	0.860314	0.787106		0.43651	0.110237	0.0671273
		0.54563	0.520614	0.321253		0.54563	0.803964	0.789224		0.54563	0.680061	0.863349		0.54563	0.0559644	0.0454452
		0.65476	0.630763	0.369882		0.65476	0.744489	1		0.65476	0.753929	0.743976		0.65476	0.00812744	0.0398776
		0.76389	0.566227	0.427028		0.76389	0.627646	0.919038		0.76389	0.689533	0.681631		0.76389	0.0261149	0.0093522
		0.87302	0.707464	0.431962		0.87302	0.432657	0.869713		0.87302	0.641749	0.605757		0.87302	0.0301539	0.0173637
		0.98214	0.720464	0.638058		0.98214	0.451551	0.798152		0.98214	0.72391	0.501223		0.98214	0.100351	0.026207
		1.09127	0.846437	0.799861		1.09127	0.324418	0.696641		1.09127	0.781372	0.4248		1.09127	0.245743	0.016037
		1.2004	0.817313	1		1.2004	0.359422	0.676012		1.2004	0.865792	0.554027		1.2004	0.522443	0.0206146
		1.30952	1	0.96391		1.30952	0.394751	0.516749		1.30952	0.728498	0.45955		1.30952	0.847566	0.0479776
		1.41865	0.905169	0.760308		1.41865	0.35534	0.415005		1.41865	0.639201	0.526817		1.41865	1	0.0722495
		1.52778	0.702855	0.528704		1.52778	0.225546	0.268671		1.52778	0.497879	0.473527		1.52778	0.807152	0.0649441
		1.6369	0.521916	0.332084		1.6369	0.263617	0.280626		1.6369	0.383133	0.377522		1.6369	0.561727	0.0403959
		1.74603	0.478945	0.20519		1.74603	0.243687	0.202108		1.74603	0.200246	0.429135		1.74603	0.324352	0.0243201
		1.85516	0.302753	0.13899		1.85516	0.214333	0.201642		1.85516	0.182124	0.473833		1.85516	0.292157	0.0250277
		1.96429	0.169236	0.0893377		1.96429	0.158177	0.0743846		1.96429	0.138981	0.298692		1.96429	0.272435	0.0187882
		2.07341	0.122233	0.0633784		2.07341	0.087451	0.00658791		2.07341	0	0.106141		2.07341	0.29059	0.0719237
		2.18254	0.126552	0.0173324		2.18254	0.04141	0		2.18254	0.150723	0.527743		2.18254	0.256617	0.176573
		2.29167	0.137889	0.0324548		2.29167	0.0162751	0.0308394		2.29167	0.13934	0.497586		2.29167	0.181042	0.345845
		2.40079	0.111406	0.0779455		2.40079	0.0392365	0.123446		2.40079	0.0801724	0.831232		2.40079	0.141267	0.574333
		2.50992	0	0.137058		2.50992	0.0836723	0.134744		2.50992	0.111279	0.912822		2.50992	0.0859679	0.724558
		2.61905	0.0434638	0.187768		2.61905	0	0.235559		2.61905	0.174225	1		2.61905	0.0414677	0.879518
		2.72817	0.0373874	0.244586		2.72817	0.225844	0.179903		2.72817	0.0885225	0.938981		2.72817	0	1
		2.8373	0.0823179	0.179175		2.8373	0.170006	0.263199		2.8373	0.222072	0.90082		2.8373	0.0310247	0.923728
		2.94643	0.0780909	0.124165		2.94643	0.158987	0.207276		2.94643	0.230434	0.707736		2.94643	0.047837	0.811562
		3.05556	0.127895	0.120239		3.05556	0.233828	0.244622		3.05556	0.420163	0.716131		3.05556	0.0409269	0.64819
		3.16468	0.201859	0.0625117		3.16468	0.357987	0.222001		3.16468	0.478411	0.488375		3.16468	0.103921	0.47852
		3.27381	0.27258	0.0464863		3.27381	0.490072	0.208862		3.27381	0.490517	0.532289		3.27381	0.103446	0.354937
		3.38294	0.406766	0.0449886		3.38294	0.516978	0.161688		3.38294	0.564073	0.364219		3.38294	0.108022	0.268489
		3.49206	0.395324	0		3.49206	0.601882	0.177285		3.49206	0.536654	0.334392		3.49206	0.0975018	0.130479
		3.60119	0.438396	0.024114		3.60119	0.563512	0.144312		3.60119	0.643587	0.204984		3.60119	0.102525	0.0521998
		3.71032	0.41517	0.00521656		3.71032	0.618166	0.128786		3.71032	0.725279	0.0538937		3.71032	0.0846625	0.00675928
		3.81944	0.539995	0.0271962		3.81944	0.604874	0.165915		3.81944	0.766232	0.0766662		3.81944	0.0732203	0.0161177
		3.92857	0.484729	0.0534136		3.92857	0.522021	0.137768		3.92857	0.744741	0		3.92857	0.0967281	0
		4.0377	0.489808	0.0761056		4.0377	0.546631	0.185202		4.0377	0.85587	0.159635		4.0377	0.0868736	0.0111134
		4.14683	0.45064	0.130983		4.14683	0.50845	0.194739		4.14683	1	0.142946		4.14683	0.0896842	0.0248058
		4.25595	0.550613	0.154646		4.25595	0.49164	0.264294		4.25595	0.952506	0.157424		4.25595	0.0942035	0.0404347
		4.36508	0.560051	0.241821		4.36508	0.550755	0.382437		4.36508	0.92363	0.226283		4.36508	0.0845654	0.0763678
		4.47421	0.527464	0.307393		4.47421	0.68482	0.425644
		4.58333	0.567544	0.362234		4.58333	0.841993	0.423324

## Sheet: exp1-endosome4
endosome 4		t26				t27				t28				t29				t30				t31				t32
line profiles			Rab5	Snx1			Rab5	Snx1			Rab5	Snx1			Rab5	Snx1
		0	607.307	558.958		0	540.073	541.686		0	547.964	817.895		0	576.027	770.427		0	564.611	590.444		0	674.758	763.4		0	639.706	691.184
		0.10913	601.252	571.145		0.10913	539.17	516.236		0.10913	538.624	913.27		0.10913	568.842	815.098		0.10913	561.424	593.122		0.10913	679.458	726.12		0.10913	635.687	686.295
		0.21825	577.262	565.489		0.21825	522.287	518.622		0.21825	539.199	973.985		0.21825	552.753	797.659		0.21825	569.673	576.569		0.21825	656.492	690.087		0.21825	641.568	674.332
		0.32738	592.137	557.57		0.32738	537.297	524.441		0.32738	550.799	994.132		0.32738	555.417	749.573		0.32738	564.974	565.635		0.32738	654.593	685.579		0.32738	616.244	645.512
		0.43651	586.798	543.516		0.43651	539.179	513.578		0.43651	537.862	925.979		0.43651	593.206	757.235		0.43651	562.455	571.006		0.43651	610.16	652.97		0.43651	621.106	637.031
		0.54563	594.948	543.457		0.54563	555.665	520.246		0.54563	522.984	825.54		0.54563	603.927	782.753		0.54563	568.162	584.81		0.54563	584.539	697.89		0.54563	641.983	623.876
		0.65476	589.288	524.227		0.65476	567.17	527.425		0.65476	514.297	774.38		0.65476	604.152	887.6		0.65476	572.366	604.89		0.65476	573.666	759.245		0.65476	654.736	614.587
		0.76389	607.007	522.904		0.76389	562.75	555.096		0.76389	541.208	687.051		0.76389	652.582	1027.2		0.76389	561.472	601.966		0.76389	585.139	851.613		0.76389	672.102	594.293
		0.87302	619.134	524.063		0.87302	570.339	533.192		0.87302	549.862	645.81		0.87302	701.356	1057.64		0.87302	549.794	629.92		0.87302	599.712	949.067		0.87302	679.375	613.922
		0.98214	654.2	512.665		0.98214	572.175	532.178		0.98214	551.394	609.251		0.98214	738.67	1046.05		0.98214	558.768	666.065		0.98214	601.287	1010.16		0.98214	676.676	631.205
		1.09127	656.997	519.587		1.09127	574.595	536.865		1.09127	564.309	598.03		1.09127	695.617	972.116		1.09127	563.877	666.374		1.09127	604.244	1018.88		1.09127	631.712	623.589
		1.2004	637.786	535.182		1.2004	575.924	533.831		1.2004	540.972	555.479		1.2004	650.6	862.748		1.2004	587.112	625.049		1.2004	583.667	929.622		1.2004	615.62	587.316
		1.30952	627.586	521.896		1.30952	548.784	520.293		1.30952	542.19	528.455		1.30952	627.865	749.812		1.30952	565.818	611.549		1.30952	568.661	823.158		1.30952	595.233	560.39
		1.41865	598.21	516.083		1.41865	551.822	527.22		1.41865	520.677	525.362		1.41865	586.363	685.296		1.41865	569.532	587.649		1.41865	599.397	726.95		1.41865	606.044	572.18
		1.52778	593.581	516.242		1.52778	548.642	525.463		1.52778	512.611	519.176		1.52778	590.96	642.774		1.52778	580.479	595.904		1.52778	618.768	677.298		1.52778	634.915	552.515
		1.6369	581.723	510.022		1.6369	561.451	560.848		1.6369	526.554	504.192		1.6369	595.388	619.373		1.6369	616.513	566.938		1.6369	615.494	639.915		1.6369	644.203	537.132
		1.74603	579.786	526.193		1.74603	565.176	543.635		1.74603	528.566	513.475		1.74603	596.342	615.662		1.74603	622.927	568.911		1.74603	651.92	643.418		1.74603	626.431	557.163
		1.85516	593.075	516.926		1.85516	588.438	564.028		1.85516	556.961	511.222		1.85516	626.734	597.716		1.85516	621.029	586.985		1.85516	675.226	641.443		1.85516	638.336	557.85
		1.96429	615.326	526.165		1.96429	618.147	566.774		1.96429	563.373	525.126		1.96429	639.799	592.088		1.96429	650.729	572.471		1.96429	700.511	645.031		1.96429	658.71	562.45
		2.07341	663.237	534.023		2.07341	646.24	568.507		2.07341	587.628	541.604		2.07341	617.014	592.16		2.07341	661.138	618.914		2.07341	719.445	622.9		2.07341	652.795	572.404
		2.18254	669.071	534.548		2.18254	666.073	546.727		2.18254	616.442	540.118		2.18254	627.289	614.723		2.18254	644.217	605.677		2.18254	747.872	622.314		2.18254	621.322	565.353
		2.29167	671.071	517.3		2.29167	694.551	530.69		2.29167	624.153	553.036		2.29167	646.237	612.57		2.29167	654.861	571.991		2.29167	767.925	645.622		2.29167	636.734	559.105
		2.40079	672.422	520.315		2.40079	710.296	526.6		2.40079	640.319	527.523		2.40079	658.019	623.835		2.40079	638.404	550.291		2.40079	779.457	638.653		2.40079	643.097	567.378
		2.50992	675.499	546.258		2.50992	689.707	536.706		2.50992	635.009	527.523		2.50992	656.743	625.74		2.50992	662.404	561.109		2.50992	738.822	652.265		2.50992	650.179	591.946
		2.61905	695.164	529.981		2.61905	700.647	526.747		2.61905	652.151	533.867		2.61905	679.531	622.096		2.61905	679.796	577.298		2.61905	741.971	638.581		2.61905	631.469	611.617
		2.72817	688.23	504.786		2.72817	684.28	502.357		2.72817	668.263	522.725		2.72817	669.004	670.197		2.72817	685.448	550.195		2.72817	708.97	635.544		2.72817	619.97	623.767
		2.8373	677.623	530.265		2.8373	686.534	510.421		2.8373	649.815	511.929		2.8373	684.791	675.2		2.8373	681.206	562.903		2.8373	716.199	657.943		2.8373	612.498	637.437
		2.94643	652.334	551.757		2.94643	633.14	520.03		2.94643	644.34	527.445		2.94643	675.517	648.148		2.94643	691.787	563.81		2.94643	692.95	663.266		2.94643	622.295	662.88
		3.05556	648.186	561.412		3.05556	617.371	530.2		3.05556	636.396	534.622		3.05556	674.602	622.392		3.05556	696.904	598.368		3.05556	674.27	648.206		3.05556	611.275	663.931
		3.16468	652.445	565.292		3.16468	584.848	528.075		3.16468	587.992	523.936		3.16468	653.472	603.586		3.16468	681.301	608.481		3.16468	662.802	644.577		3.16468	609.96	662.464
		3.27381	656.22	552.97		3.27381	564.928	538.383		3.27381	576.321	529.118		3.27381	651.225	569.922		3.27381	637.968	581.238		3.27381	676.682	637.732		3.27381	632.887	690.125
		3.38294	653.174	545.775		3.38294	570.381	520.983		3.38294	573.164	499.084		3.38294	640.241	595.425		3.38294	623.503	567.96		3.38294	681.387	657.782		3.38294	623.822	699.957
		3.49206	641.38	548.055		3.49206	531.364	521.404		3.49206	540.128	512.728		3.49206	653.894	593.47		3.49206	615.17	558.495		3.49206	668.928	655.592		3.49206	643.778	682.793
		3.60119	613.643	529.949		3.60119	533.756	500.387		3.60119	570.273	528.584		3.60119	632.184	620.863		3.60119	599.787	565.484		3.60119	684.386	691.259
		3.71032	611.855	544.332		3.71032	529.596	506.019		3.71032	562.813	529.687		3.71032	634.331	639.818		3.71032	586.493	576.959		3.71032	666.93	726.591
		3.81944	613.528	560.174		3.81944	530.904	529.616		3.81944	525.338	518.57		3.81944	609.228	641.329		3.81944	553.324	567.639		3.81944	658.26	729.464
		3.92857	606.441	564.997		3.92857	540.916	533.347		3.92857	543.653	572.597		3.92857	607.131	670.528		3.92857	566.67	575.463
						4.0377	547.27	550.144		4.0377	521.088	627.052		4.0377	584.919	681.858		4.0377	564.341	580.616
										4.14683	528.58	700.604		4.14683	566.281	697.363
										4.25595	540.995	794.857		4.25595	575.114	728.606
														4.36508	584.062	743.04
														4.47421	576.068	755.55
individual	min		577.262	504.786			522.287	500.387			512.611	499.084			552.753	569.922			549.794	550.195			568.661	622.314			595.233	537.132
individual	max		695.164	571.145			710.296	568.507			668.263	994.132			738.67	1057.64			696.904	666.374			779.457	1018.88			679.375	699.957
overall	min		512.611	499.084
overall	max		779.457	1057.64
overall	min		512.611	499.084			512.611	499.084			512.611	499.084			512.611	499.084			512.611	499.084			512.611	499.084			512.611	499.084
overall	max		779.457	1057.64			779.457	1057.64			779.457	1057.64			779.457	1057.64			779.457	1057.64			779.457	1057.64			779.457	1057.64
		t26				t27				t28				t29				t30				t31				t32
			Rab5	Snx1			Rab5	Snx1			Rab5	Snx1			Rab5	Snx1			Rab5	Snx1			Rab5	Snx1			Rab5	Snx1
		0	0.25483	0.816358		0	0.0946019	0.60626		0	0.227128	0.644		0	0.125185	0.411104		0	0.100721	0.34644		0	0.503316	0.355769		0	0.52854	0.94612
		0.10913	0.203474	1		0.10913	0.0897989	0.232659		0.10913	0.167123	0.836658		0.10913	0.0865386	0.502695		0.10913	0.0790565	0.36949		0.10913	0.525612	0.261762		0.10913	0.480772	0.916094
		0.21825	0	0.914773		0.21825	0	0.267688		0.21825	0.170817	0.959303		0.21825	0	0.466939		0.21825	0.13513	0.227012		0.21825	0.416664	0.1709		0.21825	0.550676	0.842622
		0.32738	0.126164	0.795438		0.32738	0.0798366	0.353108		0.32738	0.245342	1		0.32738	0.014329	0.368346		0.32738	0.103188	0.132898		0.32738	0.407655	0.159532		0.32738	0.249705	0.665623
		0.43651	0.0808807	0.583645		0.43651	0.0898468	0.193642		0.43651	0.162227	0.862331		0.43651	0.217586	0.384056		0.43651	0.0860648	0.179129		0.43651	0.196868	0.0773037		0.43651	0.307487	0.613536
		0.54563	0.150006	0.582754		0.54563	0.177534	0.291521		0.54563	0.0666423	0.659443		0.54563	0.275252	0.436377		0.54563	0.124859	0.297945		0.54563	0.075324	0.190576		0.54563	0.5556	0.532744
		0.65476	0.102	0.292977		0.65476	0.238728	0.396906		0.65476	0.0108319	0.5561		0.65476	0.276462	0.651349		0.65476	0.153436	0.470782		0.65476	0.0237433	0.345292		0.65476	0.707168	0.475695
		0.76389	0.252286	0.273042		0.76389	0.215218	0.803118		0.76389	0.183724	0.379694		0.76389	0.536955	0.937569		0.76389	0.0793828	0.445614		0.76389	0.0781704	0.578211		0.76389	0.913558	0.351058
		0.87302	0.355142	0.290504		0.87302	0.255584	0.481563		0.87302	0.239322	0.296387		0.87302	0.799298	1		0.87302	0	0.686226		0.87302	0.147304	0.823956		0.87302	1	0.471611
		0.98214	0.652559	0.118735		0.98214	0.265349	0.466684		0.98214	0.249165	0.222538		0.98214	1	0.97623		0.98214	0.061002	0.99734		0.98214	0.154775	0.978014		0.98214	0.967913	0.577755
		1.09127	0.676282	0.223051		1.09127	0.278221	0.535497		1.09127	0.332138	0.199872		1.09127	0.768429	0.824636		1.09127	0.0957311	1		1.09127	0.168803	1		1.09127	0.433535	0.530981
		1.2004	0.513342	0.458065		1.2004	0.28529	0.490956		1.2004	0.182208	0.113918		1.2004	0.526294	0.600394		1.2004	0.253674	0.644299		1.2004	0.0711873	0.774923		1.2004	0.24229	0.308208
		1.30952	0.426829	0.257853		1.30952	0.140935	0.292214		1.30952	0.190033	0.0593296		1.30952	0.404008	0.368836		1.30952	0.108925	0.528099		1.30952	0	0.506458		1.30952	0	0.14284
		1.41865	0.177673	0.170255		1.41865	0.157094	0.393898		1.41865	0.0518207	0.0530817		1.41865	0.18078	0.236556		1.41865	0.134172	0.322382		1.41865	0.145809	0.263855		1.41865	0.128482	0.21525
		1.52778	0.138412	0.17264		1.52778	0.140179	0.368114		1.52778	0	0.040586		1.52778	0.205506	0.149372		1.52778	0.208585	0.393436		1.52778	0.237704	0.13865		1.52778	0.471609	0.0944757
		1.6369	0.0378365	0.0789112		1.6369	0.208309	0.887556		1.6369	0.089578	0.0103182		1.6369	0.229323	0.101392		1.6369	0.453531	0.144114		1.6369	0.222172	0.0443835		1.6369	0.581992	0
		1.74603	0.0214076	0.322602		1.74603	0.228122	0.634873		1.74603	0.102504	0.0290699		1.74603	0.234454	0.0937827		1.74603	0.497131	0.161096		1.74603	0.394974	0.0532169		1.74603	0.370774	0.123022
		1.85516	0.13412	0.182951		1.85516	0.35185	0.934239		1.85516	0.28493	0.0245188		1.85516	0.397925	0.0569873		1.85516	0.484229	0.316667		1.85516	0.505536	0.0482366		1.85516	0.512254	0.127241
		1.96429	0.322844	0.322174		1.96429	0.509869	0.974554		1.96429	0.326125	0.052605		1.96429	0.468198	0.0454479		1.96429	0.686119	0.191739		1.96429	0.625486	0.0572843		1.96429	0.754403	0.155492
		2.07341	0.729207	0.440586		2.07341	0.659293	1		2.07341	0.481953	0.0858907		2.07341	0.345643	0.0455956		2.07341	0.756876	0.591492		2.07341	0.715308	0.00147769		2.07341	0.684099	0.216625
		2.18254	0.778689	0.448499		2.18254	0.764783	0.680262		2.18254	0.667071	0.0828889		2.18254	0.40091	0.0918575		2.18254	0.641853	0.477556		2.18254	0.850163	0		2.18254	0.310056	0.173321
		2.29167	0.795652	0.188591		2.29167	0.916254	0.444835		2.29167	0.716611	0.108983		2.29167	0.502827	0.0874431		2.29167	0.714207	0.187607		2.29167	0.945293	0.0587746		2.29167	0.493225	0.134949
		2.40079	0.807111	0.234027		2.40079	1	0.384804		2.40079	0.820471	0.057447		2.40079	0.566199	0.11054		2.40079	0.602338	0.000826311		2.40079	1	0.0412012		2.40079	0.568848	0.185758
		2.50992	0.833209	0.624969		2.50992	0.890489	0.53315		2.50992	0.786357	0.057447		2.50992	0.559336	0.114446		2.50992	0.765482	0.0939412		2.50992	0.807231	0.0755259		2.50992	0.653014	0.336644
		2.61905	1	0.379679		2.61905	0.948678	0.386963		2.61905	0.896487	0.0702619		2.61905	0.681906	0.106975		2.61905	0.883706	0.233287		2.61905	0.822169	0.0410197		2.61905	0.430644	0.457454
		2.72817	0.941188	0		2.72817	0.861624	0.0289181		2.72817	1	0.047755		2.72817	0.625284	0.205598		2.72817	0.922126	0		2.72817	0.665615	0.0333614		2.72817	0.293984	0.532074
		2.8373	0.851224	0.383962		2.8373	0.873612	0.147284		2.8373	0.881479	0.025947		2.8373	0.710199	0.215856		2.8373	0.893291	0.109383		2.8373	0.699909	0.0898438		2.8373	0.205184	0.616029
		2.94643	0.636732	0.707841		2.94643	0.589615	0.288349		2.94643	0.846305	0.0572894		2.94643	0.660316	0.16039		2.94643	0.965217	0.11719		2.94643	0.589617	0.103267		2.94643	0.321614	0.772289
		3.05556	0.60155	0.853332		3.05556	0.505742	0.437643		3.05556	0.795268	0.071787		3.05556	0.655395	0.107582		3.05556	1	0.414645		3.05556	0.501001	0.0652905		3.05556	0.190649	0.778744
		3.16468	0.637674	0.911798		3.16468	0.332755	0.406454		3.16468	0.484292	0.0502012		3.16468	0.541742	0.0690228		3.16468	0.893937	0.501691		3.16468	0.446598	0.0561395		3.16468	0.175018	0.769734
		3.27381	0.669692	0.726116		3.27381	0.226803	0.557772		3.27381	0.409311	0.0606689		3.27381	0.529656	0		3.27381	0.599375	0.2672		3.27381	0.512443	0.0388788		3.27381	0.447502	0.939616
		3.38294	0.643857	0.617688		3.38294	0.255807	0.302342		3.38294	0.389028	0		3.38294	0.470576	0.0522899		3.38294	0.501047	0.152911		3.38294	0.534763	0.0894378		3.38294	0.339771	1
		3.49206	0.543825	0.652045		3.49206	0.0482796	0.30853		3.49206	0.176785	0.027561		3.49206	0.544012	0.0482815		3.49206	0.444402	0.0714415		3.49206	0.475659	0.0839154		3.49206	0.576941	0.894586
		3.60119	0.30857	0.379203		3.60119	0.0610024	0		3.60119	0.370455	0.0595902		3.60119	0.427239	0.104447		3.60119	0.339834	0.131599		3.60119	0.54899	0.173855
		3.71032	0.293405	0.59594		3.71032	0.0388758	0.0826704		3.71032	0.322527	0.0618182		3.71032	0.438787	0.143311		3.71032	0.249466	0.230369		3.71032	0.466181	0.26295
		3.81944	0.307594	0.834681		3.81944	0.0458329	0.429082		3.81944	0.0817657	0.0393618		3.81944	0.303765	0.146409		3.81944	0.0239956	0.150148		3.81944	0.425051	0.270195
		3.92857	0.247485	0.907353		3.92857	0.0990857	0.483841		3.92857	0.199432	0.148497		3.92857	0.292485	0.206277		3.92857	0.114717	0.217492
						4.0377	0.132882	0.730425		4.0377	0.0544612	0.258496		4.0377	0.173013	0.229507		4.0377	0.0988852	0.261846
										4.14683	0.102594	0.407072		4.14683	0.0727637	0.261298
										4.25595	0.182356	0.597463		4.25595	0.120274	0.325357
														4.36508	0.168403	0.354951
														4.47421	0.125405	0.380601

## Sheet: exp1-endosome5
endosome 5		t29				t30				t31				t32				t33				t34				t35
line profiles			Rab5	Snx1			Rab5	Snx1			Rab5	Snx1			Rab5	Snx1			Rab5	Snx1			Rab5	Snx1			Rab5	Snx1
		0	1033.52	896.387		0	1002.63	856.278		0	1230.44	894.865		0	1199.3	1210.15		0	1458.03	851.548		0	1337.32	832.341		0	1214.4	1060.6
		0.10913	1055.32	949.462		0.10913	1015.85	879.181		0.10913	1262.58	934.555		0.10913	1227.23	1109.16		0.10913	1377.41	844.427		0.10913	1193.16	732.084		0.10913	1181.37	956
		0.21825	1052.42	923.864		0.21825	1028.28	862.867		0.21825	1322.91	989.546		0.21825	1254.71	1064.45		0.21825	1306.46	847.555		0.21825	1082.44	650.002		0.21825	1155.58	858.737
		0.32738	1081.37	910.463		0.32738	1018.64	853.056		0.32738	1359.92	1063.58		0.32738	1241.98	999.887		0.32738	1212.48	834.451		0.32738	1060.28	626.325		0.32738	1179.42	785.888
		0.43651	1069.26	901.328		0.43651	983.529	843.948		0.43651	1307.74	1133.68		0.43651	1243.31	962.117		0.43651	1172.07	820.489		0.43651	1047.52	603.913		0.43651	1187.62	730.27
		0.54563	1063.45	888.247		0.54563	1009.1	858.765		0.54563	1239.46	1139.66		0.54563	1231.64	971.469		0.54563	1135.38	835.167		0.54563	970.3	615.554		0.54563	1172.48	711.064
		0.65476	1006.95	900.744		0.65476	1005.03	823.619		0.65476	1192.15	1070.56		0.65476	1266.2	1013.61		0.65476	1139.71	840.12		0.65476	960.834	597.25		0.65476	1198.14	703.629
		0.76389	993.408	941.278		0.76389	1061.66	838.85		0.76389	1181.84	954.283		0.76389	1301.51	1043.65		0.76389	1200.28	846.769		0.76389	949.961	620.334		0.76389	1216.77	694.792
		0.87302	1002.39	1006.76		0.87302	1111.78	852.13		0.87302	1158.24	884.039		0.87302	1287.68	1015.72		0.87302	1228.24	801.348		0.87302	947.442	642.242		0.87302	1229.76	690.552
		0.98214	1058.95	1058.84		0.98214	1173.91	858.202		0.98214	1144.12	815.617		0.98214	1310.79	957.556		0.98214	1209.52	781.352		0.98214	943.586	641.669		0.98214	1183.78	688.916
		1.09127	1113.02	1080.81		1.09127	1196.2	874.545		1.09127	1139.97	795.432		1.09127	1245.97	918.028		1.09127	1179.12	750.002		1.09127	927.035	638.74		1.09127	1153.15	689.164
		1.2004	1151.8	1105.92		1.2004	1166.97	882.403		1.2004	1134.61	778.889		1.2004	1247.78	874.523		1.2004	1111.71	714.525		1.2004	920.516	620.461		1.2004	1111.83	701.218
		1.30952	1203.48	1110.42		1.30952	1183.36	873.317		1.30952	1148.03	788.545		1.30952	1214.4	853.129		1.30952	1095.16	686.031		1.30952	908.859	592.84		1.30952	1079.83	735.839
		1.41865	1233.49	1094.18		1.41865	1167.72	909.78		1.41865	1142.37	734.445		1.41865	1107.17	803.161		1.41865	1064.45	677.747		1.41865	899.646	569.035		1.41865	1090.38	752.77
		1.52778	1258.89	1084.28		1.52778	1214.38	960.265		1.52778	1128.07	717.842		1.52778	1071.96	790.617		1.52778	1069.9	692.415		1.52778	895.152	553.552		1.52778	1120.38	789.469
		1.6369	1337.76	1068.81		1.6369	1186.43	952.737		1.6369	1157.29	760.581		1.6369	1074.37	763.587		1.6369	1088.19	692.492		1.6369	879.371	546.473		1.6369	1159.17	779.36
		1.74603	1475.25	1068.5		1.74603	1191.64	934.935		1.74603	1132.66	775.462		1.74603	1104.55	749.767		1.74603	1082.04	704.752		1.74603	866.826	523.803		1.74603	1170.43	745.644
		1.85516	1635.2	1173.5		1.85516	1150.45	912.436		1.85516	1120.78	797.082		1.85516	1120.01	747.104		1.85516	1108.66	737.598		1.85516	898.929	517.186		1.85516	1175.99	742.569
		1.96429	1689.14	1236.18		1.96429	1133.02	873.092		1.96429	1057.25	810.378		1.96429	1145.01	757.088		1.96429	1080.73	755.162		1.96429	918.858	522.105		1.96429	1200.85	725.595
		2.07341	1612.8	1202.3		2.07341	1104.14	859.507		2.07341	1080.52	872.356		2.07341	1151.45	755.111		2.07341	1101.93	753.579		2.07341	880.42	515.799		2.07341	1207.55	718.22
		2.18254	1535.54	1140.23		2.18254	1139.39	852.623		2.18254	1136.28	981.537		2.18254	1186.46	741.881		2.18254	1124.82	770.848		2.18254	860.019	535.488		2.18254	1184.11	723.189
		2.29167	1407.16	1113.63		2.29167	1169.78	859.118		2.29167	1167.62	1074.01		2.29167	1219.51	745.372		2.29167	1131.2	811.859		2.29167	883.794	555.213		2.29167	1130.99	685.68
		2.40079	1316.91	1096.67		2.40079	1117.63	825.81		2.40079	1136.34	1141.97		2.40079	1235.4	748.328		2.40079	1125.05	884.544		2.40079	881.368	563.586		2.40079	1080.22	669.693
		2.50992	1269.18	1042.51		2.50992	1096.96	840.976		2.50992	1180.36	1125.12		2.50992	1265.05	760.364		2.50992	1125.79	962.254		2.50992	891.371	636.182		2.50992	1069.43	683.514
		2.61905	1205.71	975.231		2.61905	1090.55	887.297		2.61905	1198.27	997.218		2.61905	1251.62	753.653		2.61905	1127.97	1018.36		2.61905	943.01	705.829		2.61905	1094.59	709.353
		2.72817	1189.88	975.347		2.72817	1060.87	978.093						2.72817	1231.77	752.73		2.72817	1178.7	1045.74		2.72817	945.481	748.102		2.72817	1156.01	802.124
		2.8373	1174.27	935.629		2.8373	1031.56	1109.07						2.8373	1196.66	742.823		2.8373	1174.32	1004.44		2.8373	981.36	772.185		2.8373	1249.83	929.087
		2.94643	1186.48	949.676		2.94643	1044.25	1168.19						2.94643	1181.19	750.076		2.94643	1125.34	907.093		2.94643	1117.04	821.837		2.94643	1314.91	1082.83
		3.05556	1105.68	933.008		3.05556	1022.15	1142.38						3.05556	1112.13	749.551		3.05556	1090.07	798.59		3.05556	1326.57	980.365		3.05556	1366.75	1285.14
		3.16468	1073.36	915.47		3.16468	1018.12	1044.14						3.16468	1106.52	739.982		3.16468	1063.16	786.175		3.16468	1621.96	1117.07		3.16468	1412.35	1491.89
		3.27381	1038.3	890.163		3.27381	1029.88	927.664						3.27381	1122.19	749.29		3.27381	1050.4	770.579		3.27381	1848.85	1164.27		3.27381	1382.85	1601.25
		3.38294	1024.99	896.924		3.38294	1030.4	888.933						3.38294	1160.23	751.674		3.38294	1082.03	769.905		3.38294	1977.17	1146.09		3.38294	1379.71	1633.53
		3.49206	1044.43	887.735		3.49206	1027.37	889.029						3.49206	1216.27	791.62		3.49206	1093.37	792.703		3.49206	1929.31	1092.08		3.49206	1363.62	1655.73
						3.60119	1030.35	909.989						3.60119	1279.04	844.691		3.60119	1067.63	794.982		3.60119	1725.31	1005.2		3.60119	1336.69	1595.83
						3.71032	1029.38	899.704						3.71032	1329.26	891.856		3.71032	1083.83	804.084						3.71032	1308.59	1529.52
						3.81944	1017.98	867.848						3.81944	1378.85	942.987		3.81944	1106.18	834.982						3.81944	1250.6	1432.66
						3.92857	1004.68	856.513						3.92857	1355.34	1022.23		3.92857	1151.38	851.819						3.92857	1231.84	1280.05
														4.0377	1326.2	1118.35		4.0377	1222.54	874.496						4.0377	1225.49	1131.08
														4.14683	1279.78	1200.18		4.14683	1371.17	904.7
														4.25595	1255.5	1241.12		4.25595	1432.75	902.709
individual	min		993.408	887.735			983.529	823.619			1057.25	717.842			1071.96	739.982			1050.4	677.747			860.019	515.799			1069.43	669.693
individual	max		1689.14	1236.18			1214.38	1168.19			1359.92	1141.97			1378.85	1241.12			1458.03	1045.74			1977.17	1164.27			1412.35	1655.73
overall	min		860.019	515.799
overall	max		1977.17	1655.73
overall	min		860.019	515.799			860.019	515.799			860.019	515.799			860.019	515.799			860.019	515.799			860.019	515.799			860.019	515.799
overall	max		1977.17	1655.73			1977.17	1655.73			1977.17	1655.73			1977.17	1655.73			1977.17	1655.73			1977.17	1655.73			1977.17	1655.73
		t29				t30				t31				t32				t33				t34				t35
			Rab5	Snx1			Rab5	Snx1			Rab5	Snx1			Rab5	Snx1			Rab5	Snx1			Rab5	Snx1			Rab5	Snx1
		0	0.0576599	0.0248303		0	0.0827229	0.0947827		0	0.572211	0.417384		0	0.414924	0.93821		0	1	0.472293		0	0.42725	0.488138		0	0.422769	0.396438
		0.10913	0.0889807	0.17715		0.10913	0.140014	0.161252		0.10913	0.67838	0.510965		0.10913	0.505945	0.736689		0.10913	0.802228	0.452942		0.10913	0.298208	0.333532		0.10913	0.326434	0.29036
		0.21825	0.0848225	0.103686		0.21825	0.193836	0.113905		0.21825	0.877721	0.640622		0.21825	0.595494	0.64746		0.21825	0.628181	0.461442		0.21825	0.199094	0.206954		0.21825	0.251212	0.19172
		0.32738	0.126423	0.0652269		0.32738	0.152113	0.0854319		0.32738	1	0.81517		0.32738	0.553997	0.518634		0.32738	0.397627	0.425833		0.32738	0.179263	0.170442		0.32738	0.320756	0.11784
		0.43651	0.109029	0.0390105		0.43651	0	0.0589987		0.43651	0.82759	0.980473		0.43651	0.558344	0.443265		0.43651	0.298475	0.387892		0.43651	0.167837	0.13588		0.43651	0.344654	0.0614346
		0.54563	0.100679	0.00146939		0.54563	0.110758	0.102		0.54563	0.602016	0.994568		0.54563	0.520315	0.461926		0.54563	0.208458	0.427779		0.54563	0.0987159	0.153832		0.54563	0.300506	0.0419567
		0.65476	0.0194657	0.0373344		0.65476	0.0931234	0		0.65476	0.445683	0.831632		0.65476	0.63294	0.546018		0.65476	0.2191	0.441238		0.65476	0.0902426	0.125605		0.65476	0.375346	0.0344164
		0.76389	0	0.153663		0.76389	0.338455	0.0442033		0.76389	0.411633	0.55748		0.76389	0.747979	0.60596		0.76389	0.367685	0.459306		0.76389	0.0805099	0.161203		0.76389	0.429674	0.0254543
		0.87302	0.0129115	0.341601		0.87302	0.555557	0.0827444		0.87302	0.333646	0.391859		0.87302	0.702931	0.550218		0.87302	0.43627	0.335878		0.87302	0.078255	0.194987		0.87302	0.467537	0.0211543
		0.98214	0.0942068	0.491042		0.98214	0.824699	0.100367		0.98214	0.287004	0.230533		0.98214	0.778217	0.434163		0.98214	0.390358	0.28154		0.98214	0.0748034	0.194104		0.98214	0.333459	0.0194951
		1.09127	0.171928	0.554113		1.09127	0.921232	0.147797		1.09127	0.273296	0.182941		1.09127	0.566998	0.355286		1.09127	0.315767	0.196348		1.09127	0.0599881	0.189587		1.09127	0.244134	0.0197466
		1.2004	0.227661	0.626162		1.2004	0.794607	0.170603		1.2004	0.255574	0.143936		1.2004	0.572906	0.268473		1.2004	0.150405	0.0999418		1.2004	0.0541527	0.161399		1.2004	0.123651	0.0319713
		1.30952	0.301938	0.639088		1.30952	0.86563	0.144233		1.30952	0.299929	0.166703		1.30952	0.464139	0.225782		1.30952	0.109809	0.0225112		1.30952	0.0437182	0.118805		1.30952	0.030328	0.0670824
		1.41865	0.345071	0.592467		1.41865	0.797877	0.250056		1.41865	0.281206	0.0391465		1.41865	0.11472	0.126072		1.41865	0.0344654	0		1.41865	0.0354714	0.082095		1.41865	0.0610875	0.0842531
		1.52778	0.381592	0.564066		1.52778	1	0.396573		1.52778	0.233973	0		1.52778	0	0.101041		1.52778	0.0478355	0.0398593		1.52778	0.0314486	0.0582188		1.52778	0.148581	0.121472
		1.6369	0.494949	0.51966		1.6369	0.878898	0.374725		1.6369	0.330524	0.10077		1.6369	0.00785937	0.0471032		1.6369	0.0927002	0.0400686		1.6369	0.0173226	0.0473023		1.6369	0.261684	0.11122
		1.74603	0.692563	0.518776		1.74603	0.901488	0.323061		1.74603	0.249141	0.135856		1.74603	0.106209	0.0195257		1.74603	0.0776202	0.0733843		1.74603	0.00609316	0.0123429		1.74603	0.294537	0.0770262
		1.85516	0.922469	0.820104		1.85516	0.723056	0.257764		1.85516	0.2099	0.186832		1.85516	0.156565	0.0142118		1.85516	0.142928	0.162641		1.85516	0.0348295	0.00213889		1.85516	0.310757	0.0739077
		1.96429	1	1		1.96429	0.647532	0.14358		1.96429	0	0.218181		1.96429	0.23802	0.0341346		1.96429	0.074404	0.21037		1.96429	0.0526686	0.00972446		1.96429	0.383229	0.0566934
		2.07341	0.890266	0.902777		2.07341	0.522458	0.104154		2.07341	0.0768598	0.364312		2.07341	0.259004	0.0301895		2.07341	0.126415	0.206069		2.07341	0.0182616	0		2.07341	0.402764	0.049214
		2.18254	0.779216	0.724645		2.18254	0.675134	0.0841752		2.18254	0.261088	0.621739		2.18254	0.373102	0.00378941		2.18254	0.182567	0.252996		2.18254	0	0.0303623		2.18254	0.334412	0.0542533
		2.29167	0.594698	0.648297		2.29167	0.806792	0.103025		2.29167	0.36465	0.83976		2.29167	0.48079	0.0107556		2.29167	0.198209	0.364441		2.29167	0.0212817	0.0607802		2.29167	0.179509	0.0162133
		2.40079	0.464976	0.599627		2.40079	0.580897	0.00635871		2.40079	0.261283	1		2.40079	0.532563	0.0166542		2.40079	0.183138	0.561958		2.40079	0.0191102	0.0736921		2.40079	0.0314536	0
		2.50992	0.396376	0.444179		2.50992	0.491352	0.0503734		2.50992	0.406726	0.960266		2.50992	0.62916	0.0406718		2.50992	0.184939	0.773129		2.50992	0.0280641	0.185642		2.50992	0	0.0140167
		2.61905	0.305146	0.251104		2.61905	0.463603	0.184806		2.61905	0.465903	0.658711		2.61905	0.585428	0.0272801		2.61905	0.190295	0.925602		2.61905	0.0742878	0.293045		2.61905	0.0733732	0.0402215
		2.72817	0.282395	0.251437		2.72817	0.335033	0.448313						2.72817	0.520742	0.0254383		2.72817	0.314737	1		2.72817	0.0764997	0.358234		2.72817	0.252486	0.134306
		2.8373	0.259961	0.137451		2.8373	0.208061	0.828431						2.8373	0.406347	0.00566914		2.8373	0.303994	0.887775		2.8373	0.108616	0.395372		2.8373	0.526067	0.263066
		2.94643	0.277509	0.177764		2.94643	0.263018	1						2.94643	0.35591	0.0201423		2.94643	0.183845	0.623233		2.94643	0.230065	0.47194		2.94643	0.715853	0.418984
		3.05556	0.161376	0.129929		3.05556	0.167313	0.925091						3.05556	0.130882	0.0190947		3.05556	0.0973171	0.328383		3.05556	0.417622	0.716405		3.05556	0.867018	0.62416
		3.16468	0.114916	0.0795965		3.16468	0.149826	0.639983						3.16468	0.112605	0		3.16468	0.0313057	0.294646		3.16468	0.68204	0.927222		3.16468	1	0.83384
		3.27381	0.0645231	0.0069681		3.27381	0.200784	0.301959						3.27381	0.163688	0.0185739		3.27381	0	0.252265		3.27381	0.885134	1		3.27381	0.913979	0.944747
		3.38294	0.0453937	0.0263715		3.38294	0.203024	0.189554						3.38294	0.287613	0.0233311		3.38294	0.0775858	0.250433		3.38294	1	0.971971		3.38294	0.904823	0.977478
		3.49206	0.0733411	0		3.49206	0.189903	0.189832						3.49206	0.470229	0.103042		3.49206	0.105418	0.312386		3.49206	0.957152	0.888681		3.49206	0.857893	1
						3.60119	0.202816	0.250662						3.60119	0.674768	0.208944		3.60119	0.0422765	0.318579		3.60119	0.774551	0.75471		3.60119	0.77937	0.939244
						3.71032	0.19861	0.220813						3.71032	0.838384	0.303061		3.71032	0.0819967	0.343313						3.71032	0.697438	0.871999
						3.81944	0.14925	0.128361						3.81944	1	0.405091		3.81944	0.136829	0.427276						3.81944	0.528322	0.773769
						3.92857	0.0916159	0.0954647						3.92857	0.923365	0.563213		3.92857	0.247734	0.473029						3.92857	0.473609	0.618996
														4.0377	0.828446	0.755028		4.0377	0.422292	0.534653						4.0377	0.455094	0.467921
														4.14683	0.677163	0.918305		4.14683	0.786913	0.61673
														4.25595	0.598068	1		4.25595	0.937995	0.61132

## Sheet: exp1-endosome6
endosome 6		t1				t2				t3				t4				t5				t6				t7				t8				t9				t10				t11				t12
line profiles			Rab5	Snx1			Rab5	Snx1			Rab5	Snx1			Rab5	Snx1			Rab5	Snx1			Rab5	Snx1			Rab5	Snx1			Rab5	Snx1			Rab5	Snx1			Rab5	Snx1			Rab5	Snx1			Rab5	Snx1
		0	922.494	946.929		0	737.606	790.891		0	713.913	735.588		0	752.598	902.958		0	707.723	771.989		0	868.693	862.716		0	1317.75	852.922		0	866.171	914.436		0	977.555	980.17		0	855.299	993.593		0	918.236	854.93		0	847.672	920.987
		0.10913	918.635	914.546		0.10913	754.33	796.522		0.10913	726.131	747.606		0.10913	761.173	889.402		0.10913	734.375	751.911		0.10913	887.393	891.704		0.10913	1173.36	876.297		0.10913	861.8	939.31		0.10913	992.238	1021.09		0.10913	844.421	1020.13		0.10913	916.504	807.971		0.10913	842.137	902.654
		0.21825	907.138	887.383		0.21825	735.988	797.558		0.21825	707.903	760.354		0.21825	780.218	848.912		0.21825	779.887	775.019		0.21825	964.243	887.823		0.21825	1049.73	927.72		0.21825	871.309	957.33		0.21825	1038.86	1094.78		0.21825	899.523	1049.56		0.21825	888.932	799.719		0.21825	836.876	903.683
		0.32738	875.853	902.554		0.32738	762.449	833.823		0.32738	732.281	725.867		0.32738	762.328	828.959		0.32738	771.03	773.965		0.32738	1030.31	897.672		0.32738	997.177	961.334		0.32738	885.232	959.679		0.32738	1133.21	1116.49		0.32738	894.806	1028.96		0.32738	874.365	771.583		0.32738	864.47	917.071
		0.43651	836.559	878.699		0.43651	759.236	861.886		0.43651	734.456	751.035		0.43651	761.337	832.576		0.43651	771.719	785.657		0.43651	1080.9	895.488		0.43651	931.816	989.369		0.43651	863.305	981.1		0.43651	1264.62	1197.9		0.43651	925.33	1049.88		0.43651	855.56	785.947		0.43651	869.544	918.964
		0.54563	840.353	836.406		0.54563	786.164	872.959		0.54563	742.593	786.881		0.54563	769.452	833.117		0.54563	786.025	782.04		0.54563	1052.62	864.156		0.54563	966.205	972.983		0.54563	820.457	977.813		0.54563	1370.35	1201.44		0.54563	920.283	1083.34		0.54563	840.955	799.025		0.54563	846.117	924.127
		0.65476	825.911	841.727		0.65476	791.921	856.952		0.65476	729.528	787.991		0.65476	757.449	869.34		0.65476	782.072	771.677		0.65476	1025.42	844.695		0.65476	970.503	943.779		0.65476	853.012	976.776		0.65476	1323.95	1237.39		0.65476	935.422	1131.2		0.65476	843.149	800.98		0.65476	880.932	914.058
		0.76389	830.841	819.637		0.76389	779.122	845.045		0.76389	719.087	819.721		0.76389	744.599	873.406		0.76389	788.125	776.363		0.76389	1007.09	836.4		0.76389	960.051	942.874		0.76389	851.86	973.226		0.76389	1314.44	1216		0.76389	920.911	1132.91		0.76389	855.776	835.614		0.76389	872.256	909.197
		0.87302	835.238	785.874		0.87302	805.947	849.423		0.87302	713.867	828.103		0.87302	769.294	863.996		0.87302	809.615	790.143		0.87302	982.585	851.586		0.87302	936.868	882.348		0.87302	874.381	933.148		0.87302	1215.16	1188.62		0.87302	912.628	1067.15		0.87302	858.351	846.737		0.87302	881.47	940.715
		0.98214	846.548	816.087		0.98214	831.782	867.877		0.98214	736.164	799.673		0.98214	777.939	841.544		0.98214	845.207	783.463		0.98214	933.604	817.141		0.98214	908.102	848.058		0.98214	907.547	942.585		0.98214	1105.8	1112.91		0.98214	924.315	1034.55		0.98214	873.542	852.671		0.98214	849.268	924.532
		1.09127	851.99	820.761		1.09127	835.884	863.692		1.09127	733.001	802.492		1.09127	766.845	803.771		1.09127	872.035	787.075		1.09127	912.824	832.905		1.09127	928.296	842.283		1.09127	991.104	937.239		1.09127	1001.23	1077.57		1.09127	922.972	1013.57		1.09127	879.41	857.492		1.09127	878.37	902.902
		1.2004	883.461	793.551		1.2004	817.582	838.345		1.2004	748.094	826.716		1.2004	774.202	802.859		1.2004	876.983	780.745		1.2004	938.777	835.185		1.2004	919.039	841.667		1.2004	1038.81	992.517		1.2004	945.178	1076.89		1.2004	948.805	1002.46		1.2004	867.858	855.733		1.2004	883.713	915.375
		1.30952	909.465	818.787		1.30952	854.578	824.08		1.30952	759.863	807.337		1.30952	811.607	801.943		1.30952	884.88	808.885		1.30952	908.226	829.132		1.30952	927.087	843.41		1.30952	1129.43	1030.52		1.30952	935.869	1119.77		1.30952	961.023	982.947		1.30952	868.145	877.13		1.30952	897.578	911.329
		1.41865	927.362	833.814		1.41865	897.542	839.16		1.41865	779.187	824.933		1.41865	859.678	803.675		1.41865	908.405	801.169		1.41865	937.135	830.101		1.41865	982.967	836.03		1.41865	1227.53	1072.05		1.41865	951.655	1112.71		1.41865	954.878	982.066		1.41865	853.055	867.019		1.41865	882.866	921.751
		1.52778	921.083	842.165		1.52778	949.699	851.812		1.52778	815.641	849.403		1.52778	930.832	784.753		1.52778	946.271	791.819		1.52778	957.094	830.338		1.52778	1028.45	835.321		1.52778	1256.57	1055.12		1.52778	989.415	1135.31		1.52778	951.728	940.109		1.52778	869	864.534		1.52778	867.325	936.065
		1.6369	903.796	825.283		1.6369	942.966	828.694		1.6369	860.462	836.116		1.6369	982.195	810.308		1.6369	939.019	807.558		1.6369	1002.44	827.686		1.6369	1077.56	811.519		1.6369	1258.16	1097.46		1.6369	1002.8	1177.98		1.6369	958.269	917.268		1.6369	907.343	884.133		1.6369	846.54	945.837
		1.74603	890.878	861.096		1.74603	994.991	847.417		1.74603	853.907	845.062		1.74603	1047.34	812.238		1.74603	958.825	794.582		1.74603	1021.79	852.47		1.74603	1119.7	825.538		1.74603	1225.67	1115.2		1.74603	1037.37	1189.31		1.74603	963.396	930.812		1.74603	952.498	928.005		1.74603	854.208	940.105
		1.85516	904.95	863.4		1.85516	1019.98	844.928		1.85516	905.874	841.53		1.85516	1039.29	835.624		1.85516	934.657	789.045		1.85516	1052.01	812.207		1.85516	1133.56	845.271		1.85516	1171.65	1114.74		1.85516	1011.9	1175.3		1.85516	959.135	945.68		1.85516	1058.39	974.486		1.85516	862.089	978.571
		1.96429	883.291	847.597		1.96429	1001.89	817.277		1.96429	905.103	829.373		1.96429	973.687	837.017		1.96429	919.78	774.177		1.96429	1118.68	832.122		1.96429	1179.21	851.5		1.96429	1130.97	1141.46		1.96429	1015.19	1144.51		1.96429	955.163	946.286		1.96429	1146.86	1034.78		1.96429	866.884	1007.49
		2.07341	892.526	841.436		2.07341	1043.68	836.273		2.07341	901.004	837.799		2.07341	942.547	831.349		2.07341	918.369	825.915		2.07341	1149.72	832.958		2.07341	1138.36	871.092		2.07341	1139.22	1125.07		2.07341	1033.23	1105.62		2.07341	942.924	936.338		2.07341	1145.26	1081.59		2.07341	864.697	1013.36
		2.18254	896.624	863.797		2.18254	986.758	859.223		2.18254	945.462	849.095		2.18254	882.534	830.095		2.18254	937.82	800.74		2.18254	1130.77	862.051		2.18254	1119.19	843.188		2.18254	1141.43	1067.6		2.18254	1045.04	1054.55		2.18254	961.158	971.351		2.18254	1104.62	1087.1		2.18254	899.94	1041.47
		2.29167	907.186	914.445		2.29167	952.965	853.094		2.29167	936.342	870.981		2.29167	889.372	819.338		2.29167	940.728	820.67		2.29167	1136.16	881.66		2.29167	1133.78	881.502		2.29167	1162.4	1038.65		2.29167	1043.98	1023.08		2.29167	969.862	955.434		2.29167	1045.42	1074.28		2.29167	906.77	1054.91
		2.40079	912.487	922.576		2.40079	968.154	874.85		2.40079	962.816	862.019		2.40079	905.228	833.945		2.40079	925.396	829.451		2.40079	1153.12	897.851		2.40079	1179.85	876.964		2.40079	1162.94	1035.9		2.40079	1052.79	1028.52		2.40079	931.433	973.366		2.40079	1026.07	1089.47		2.40079	944.734	1101.93
		2.50992	932.563	936.212		2.50992	955.905	886.168		2.50992	968.514	853.717		2.50992	896.625	831.613		2.50992	951.278	840.902		2.50992	1124.61	880.237		2.50992	1203.82	891.039		2.50992	1155.16	1019.29		2.50992	1059.48	1039.54		2.50992	946.563	1005.04		2.50992	988.136	1094.06		2.50992	981.36	1153.6
		2.61905	961.4	957.41		2.61905	960.057	887.077		2.61905	953.409	878.629		2.61905	896.59	827.087		2.61905	974.675	842.285		2.61905	1104.98	900.725		2.61905	1219.56	882.608		2.61905	1116.24	1005.44		2.61905	1053.92	1033.87		2.61905	944.323	1011.97		2.61905	923.403	1045.68		2.61905	989.263	1132.5
		2.72817	983.964	995.375		2.72817	965.432	884.417		2.72817	968.303	898.597		2.72817	893.2	835.399		2.72817	970.333	869.494		2.72817	1053.9	898.012		2.72817	1211.64	876.458		2.72817	1123.07	985.628		2.72817	1031.8	1026.49		2.72817	955.219	1007.22		2.72817	903.946	1021.58		2.72817	1014.15	1104.27
		2.8373	1002.83	992.812		2.8373	994.781	894.496		2.8373	1000.84	888.342		2.8373	923.318	861.459		2.8373	975.443	876.809		2.8373	1034.05	891.196		2.8373	1193.24	835.679		2.8373	1101.37	1036.98		2.8373	1028.22	1037.78		2.8373	950.617	1015.04		2.8373	884.557	975.396		2.8373	1000.2	1142.2
		2.94643	1027.56	960.301		2.94643	1022.79	885.496		2.94643	990.322	890.54		2.94643	950.909	906.296		2.94643	986.207	882.492		2.94643	1001.92	907.503		2.94643	1150.03	846.596		2.94643	1077.2	1041.25		2.94643	993.825	1007.22		2.94643	984.692	1059.7		2.94643	903.561	971.115		2.94643	1032.89	1193
		3.05556	1033.06	965.607		3.05556	1027.36	915.7		3.05556	1006.13	884.356		3.05556	988.56	974.166		3.05556	970.394	911.117		3.05556	1017.78	934.728		3.05556	1137.73	865.37		3.05556	1097.3	1007.59		3.05556	959.839	1015.34		3.05556	956.61	1108.73		3.05556	950.244	990.363		3.05556	1045.87	1222.07
		3.16468	1037.72	965.853		3.16468	1029.26	917.197		3.16468	1055.75	894.242		3.16468	1064.23	1043.31		3.16468	958.966	911.588		3.16468	1023.49	955.858		3.16468	1111.57	844.454		3.16468	1097.14	999.202		3.16468	972.671	1033.61		3.16468	949.948	1196.22		3.16468	990.152	965.616		3.16468	1020.15	1195.28
		3.27381	1062.02	981.284		3.27381	1016.23	938.114		3.27381	1062.94	913.694		3.27381	1087.78	1100.45		3.27381	987.453	957.925		3.27381	1028.23	983.084		3.27381	1088.58	917.333		3.27381	1071.74	980.892		3.27381	986.904	1021.26		3.27381	948.207	1276.73		3.27381	968.553	966.312		3.27381	1005.49	1143.93
		3.38294	1064.27	993.167		3.38294	1011.64	898.764		3.38294	1038.22	925.643		3.38294	1091.34	1189.26		3.38294	1010.09	973.084		3.38294	1050	1019.01		3.38294	1103.92	921.957		3.38294	1078.22	1016.71		3.38294	984.268	1034.22		3.38294	933.007	1263.2		3.38294	957.484	976.846		3.38294	998.621	1071.43
		3.49206	1012.76	969.059		3.49206	991.616	912.875		3.49206	996.493	917.42		3.49206	1051.37	1157		3.49206	1022.88	966.92		3.49206	1093.4	1083.72		3.49206	1193.57	936.302		3.49206	1069.34	1002.72		3.49206	967.887	1054.3		3.49206	937.308	1218.28		3.49206	1005.09	948.574		3.49206	957.355	1075.93
		3.60119	1014.98	981.615		3.60119	967.373	901.85		3.60119	964.793	915.517		3.60119	1010.65	1134.98		3.60119	1063.23	997.112		3.60119	1162.23	1130.2		3.60119	1272.2	999.821		3.60119	1058.66	1019.37		3.60119	961.464	1101.88		3.60119	919.765	1193.6		3.60119	1032.51	954.185		3.60119	942.747	1060.59
		3.71032	981.841	953.956		3.71032	937.275	903.438		3.71032	936.011	910.121		3.71032	980.778	1098.6		3.71032	1109.49	1015.8		3.71032	1243.7	1161.84		3.71032	1315.52	1067.35		3.71032	1021.75	991.467		3.71032	974.3	1167.73		3.71032	918.883	1111.78		3.71032	1053.85	974.421		3.71032	919.63	1012.95
		3.81944	954.44	902.435		3.81944	918.44	909.306		3.81944	925.277	919.792		3.81944	936.703	1050.89		3.81944	1121.95	1047.89		3.81944	1298.4	1177.88		3.81944	1356.86	1085.21		3.81944	1041.05	990.026		3.81944	998.687	1237.87		3.81944	936.514	1044.8		3.81944	1083.42	996.291		3.81944	923.189	999.634
		3.92857	934.829	902.741		3.92857	871.153	893.062		3.92857	960.591	905.681		3.92857	897.946	1023.14		3.92857	1151.72	1074.69		3.92857	1278.18	1162.84		3.92857	1353.89	1105.73		3.92857	1028.81	984.056		3.92857	998.805	1263.96		3.92857	922.104	1039.14		3.92857	1059.69	1015.4		3.92857	918.426	956.578
		4.0377	936.172	903.716		4.0377	848.71	899.435		4.0377	972.659	936.96		4.0377	870.256	976.263		4.0377	1105.93	1076.88		4.0377	1234.71	1163.25		4.0377	1280.6	1103.51		4.0377	1015.63	935.231		4.0377	1035.46	1233.46		4.0377	960.282	1048.4		4.0377	1079.72	1023.84		4.0377	934.088	957.848
		4.14683	900.473	882.302		4.14683	843.329	880.838		4.14683	972.575	984.492		4.14683	847.475	929.949		4.14683	1032.25	1088.28		4.14683	1205.55	1216.64		4.14683	1142.44	1092.59		4.14683	1030.64	915.365		4.14683	1027.27	1161.42		4.14683	985.112	1030.07		4.14683	1052.54	1050.41		4.14683	962.207	913.232
		4.25595	864.331	863.883		4.25595	862.41	863.282		4.25595	1013.76	948.773		4.25595	814.15	890.801		4.25595	976.019	1039.95		4.25595	1153.23	1251.37		4.25595	1087.06	1018.06		4.25595	1039.26	901.175		4.25595	988.972	1093.01		4.25595	995.914	1023.33		4.25595	1032.5	1082.8		4.25595	947.082	899.054
		4.36508	849.461	844.968		4.36508	823.47	859.494		4.36508	1011.58	995.585		4.36508	814.961	858.043		4.36508	947.621	993.91		4.36508	1132.86	1284.17		4.36508	1052.3	979.236		4.36508	1065.42	850.234		4.36508	1005.88	1047.2		4.36508	970.784	1029.2		4.36508	1076.97	1135.16		4.36508	922.393	895.693
		4.47421	862.759	871.157		4.47421	841.582	840.998		4.47421	1031.34	945.745		4.47421	798.307	841.577		4.47421	928.459	967.175		4.47421	1088.15	1286.86		4.47421	1009.6	927.404		4.47421	1060.5	839.119		4.47421	979.597	983.061		4.47421	950.952	1018.83		4.47421	1056.01	1138.27		4.47421	914.546	882.448
		4.58333	850.06	826.982		4.58333	827.546	867.993		4.58333	1010.47	927.099		4.58333	792.668	831.514		4.58333	904.236	914.965		4.58333	1039.27	1266.7		4.58333	999.56	921.046		4.58333	1093.82	840.225		4.58333	975.677	974.993		4.58333	937.047	1007.31		4.58333	1021.83	1096.74		4.58333	910.747	893.304
		4.69246	843.288	818.647		4.69246	778.66	850.394		4.69246	962.612	923.804		4.69246	777.038	809.205		4.69246	872.607	893.458		4.69246	1005.99	1180.61		4.69246	996.77	925.087		4.69246	1056.63	833.936		4.69246	971.555	915.568		4.69246	921.123	975.691		4.69246	1015.85	1003.42		4.69246	887.443	907.57
		4.80159	886.831	827.606		4.80159	761.454	859.083		4.80159	910.797	890.361		4.80159	781.227	815.919		4.80159	853.187	862.267		4.80159	972.303	1103.3		4.80159	981.277	911.709		4.80159	1073.45	818.705		4.80159	958.34	914.176		4.80159	922.753	989.304		4.80159	1022.79	923.579		4.80159	867.292	896.661
		4.91071	858.075	822.011		4.91071	760.577	881.52		4.91071	875.445	864.522		4.91071	758.833	822.77		4.91071	835.581	842.65		4.91071	925.209	1050.31		4.91071	972.55	894.78		4.91071	1087.9	821.805		4.91071	950.102	895.369		4.91071	915.449	939.771		4.91071	999.534	908.656		4.91071	868.684	880.922
		5.01984	852.553	863.238		5.01984	728.622	889.653		5.01984	876.328	829.422		5.01984	760.134	831.603		5.01984	840.421	817.809		5.01984	901.817	957.244		5.01984	980.674	911.5		5.01984	1053.43	836.393		5.01984	891.669	889.757		5.01984	911.766	920.268		5.01984	974.274	893.802		5.01984	855.02	870.863
		5.12897	879.022	869.048		5.12897	741.827	881.209		5.12897	807.739	808.555		5.12897	772.382	872.887		5.12897	795.877	765.616		5.12897	878.17	899.675		5.12897	964.401	844.059		5.12897	1022.46	826.332		5.12897	863.22	894.063		5.12897	906.399	910.086		5.12897	923.147	896.085		5.12897	878.754	868.899
		5.2381	903.808	888.771		5.2381	741.203	844.036		5.2381	781.641	787.699		5.2381	791.042	882.85		5.2381	763.399	757.732		5.2381	863.958	867.935		5.2381	963.227	869.678		5.2381	1012.91	864.71		5.2381	813.461	877.554		5.2381	887.166	893.967		5.2381	932.952	889.143		5.2381	858.91	863.332
		5.34722	925.802	942.153		5.34722	746.563	838.398		5.34722	783.535	767.598		5.34722	798.663	887.956		5.34722	765.21	766.558		5.34722	830.417	839.998		5.34722	921.626	840.377		5.34722	1027.67	841.912		5.34722	812.984	901.18		5.34722	871.738	892.564		5.34722	902.632	884.648		5.34722	820.41	883.963
		5.45635	921.488	959.481		5.45635	737.246	815.161		5.45635	761.316	766.11		5.45635	782.425	905.345		5.45635	751.38	776.861		5.45635	819.112	813.856		5.45635	925.794	838.714		5.45635	978.419	887.884		5.45635	827.739	892.059		5.45635	863.998	927.825		5.45635	920.084	880.126		5.45635	831.227	872.662
										5.56548	756.906	755.911						5.56548	746.258	745.089		5.56548	831.477	795.862		5.56548	888.582	796.365		5.56548	927.722	869.331		5.56548	792.554	892.73		5.56548	828.701	919.378		5.56548	927.735	894.979		5.56548	854.487	856.589
										5.6746	751.828	749.225						5.6746	728.803	767.593		5.6746	847.466	823.428		5.6746	880.11	795.657		5.6746	909.784	852.287		5.6746	758.174	886.819		5.6746	831.939	922.922		5.6746	923.919	884.178		5.6746	873.521	849.571
										5.78373	750.334	766.188						5.78373	724.786	742.967		5.78373	846.484	801.141		5.78373	883.938	781.134		5.78373	882.452	852.886		5.78373	752.235	877.79		5.78373	808.052	937.28		5.78373	904.475	867.567		5.78373	847.31	854.7
										5.89286	734.595	752.202						5.89286	710.36	763.327		5.89286	826.701	789.784		5.89286	938.242	784.85		5.89286	904.081	850.954		5.89286	778.672	876.266		5.89286	812.355	927.809		5.89286	889.549	860.73		5.89286	860.27	856.018
										6.00198	725.581	755.086						6.00198	699.065	763.911		6.00198	836.879	821.135		6.00198	1005.09	762.373		6.00198	915.714	875.363		6.00198	772.22	874.428		6.00198	812.756	919.265		6.00198	905.677	869.489		6.00198	861.688	869.263
																		6.11111	719.818	768.161		6.11111	846.009	834.279		6.11111	1126.69	759.946		6.11111	906.692	860.282		6.11111	792.747	906.141		6.11111	847.937	952.131		6.11111	902.122	838.584		6.11111	885.859	861.649
																										6.22024	1232.44	789.506		6.22024	870.962	878.56		6.22024	827.162	921.261		6.22024	808.509	955.145		6.22024	947.664	837.672		6.22024	859.05	899.704
																										6.32937	1291.41	803.656		6.32937	838.198	867.424		6.32937	846.121	923.326
																										6.43849	1327.12	839.412		6.43849	855.885	867.206		6.43849	932.828	974.223
																														6.54762	832.118	856.049
																														6.65675	855.982	893.638
individual	min		825.911	785.874			728.622	790.891			707.903	725.867			744.599	784.753			699.065	742.967			819.112	789.784			880.11	759.946			820.457	818.705			752.235	874.428			808.052	892.564			840.955	771.583			820.41	849.571
individual	max		1064.27	995.375			1043.68	938.114			1062.94	995.585			1091.34	1189.26			1151.72	1088.28			1298.4	1286.86			1356.86	1105.73			1258.16	1141.46			1370.35	1263.96			995.914	1276.73			1146.86	1138.27			1045.87	1222.07
overall	min		699.065	725.867
overall	max		1370.35	1550.3
overall	min		699.065	725.867			699.065	725.867			699.065	725.867			699.065	725.867			699.065	725.867			699.065	725.867			699.065	725.867			699.065	725.867			699.065	725.867			699.065	725.867			699.065	725.867			699.065	725.867
overall	max		1370.35	1550.3			1370.35	1550.3			1370.35	1550.3			1370.35	1550.3			1370.35	1550.3			1370.35	1550.3			1370.35	1550.3			1370.35	1550.3			1370.35	1550.3			1370.35	1550.3			1370.35	1550.3			1370.35	1550.3
			Rab5	Snx1			Rab5	Snx1			Rab5	Snx1			Rab5	Snx1			Rab5	Snx1			Rab5	Snx1			Rab5	Snx1			Rab5	Snx1			Rab5	Snx1			Rab5	Snx1			Rab5	Snx1			Rab5	Snx1
		0	0.405193	0.768755		0	0.0285157	0		0	0.016928	0.0360413		0	0.0230691	0.292221		0	0.0191273	0.0840465		0	0.103448	0.146723		0	0.917981	0.268882		0	0.104439	0.296603		0	0.364529	0.271461		0	0.251498	0.262982		0	0.252629	0.227299		0	0.120915	0.191722
		0.10913	0.389003	0.614183		0.10913	0.0815987	0.0382481		0.10913	0.0513416	0.080599		0.10913	0.0477994	0.258708		0.10913	0.0780071	0.0259014		0.10913	0.142465	0.20504		0.10913	0.615103	0.336482		0.10913	0.0944534	0.37367		0.10913	0.388284	0.376503		0.10913	0.193594	0.332051		0.10913	0.246967	0.0992353		0.10913	0.0963657	0.142505
		0.21825	0.34077	0.484528		0.21825	0.0233801	0.045285		0.21825	0	0.127863		0.21825	0.102725	0.158611		0.21825	0.178553	0.0928212		0.21825	0.302808	0.197232		0.21825	0.355783	0.485195		0.21825	0.116178	0.429501		0.21825	0.463714	0.565691		0.21825	0.486905	0.408676		0.21825	0.156835	0.0767309		0.21825	0.0730316	0.145268
		0.32738	0.209521	0.556942		0.32738	0.107369	0.291612		0.32738	0.0686638	0		0.32738	0.0511304	0.109284		0.32738	0.158986	0.0897689		0.32738	0.440645	0.217046		0.32738	0.245554	0.582405		0.32738	0.147987	0.436779		0.32738	0.616351	0.621433		0.32738	0.461796	0.355054		0.32738	0.109216	0		0.32738	0.195419	0.181209
		0.43651	0.0446714	0.443077		0.43651	0.0971706	0.482228		0.43651	0.07479	0.0933123		0.43651	0.0482723	0.118226		0.43651	0.160508	0.123628		0.43651	0.546215	0.212652		0.43651	0.108456	0.663481		0.43651	0.0978917	0.503148		0.43651	0.828953	0.830408		0.43651	0.624277	0.409489		0.43651	0.0477433	0.0391727		0.43651	0.217924	0.186291
		0.54563	0.0605883	0.241202		0.54563	0.182642	0.55744		0.54563	0.097709	0.226214		0.54563	0.071676	0.119563		0.54563	0.192113	0.113154		0.54563	0.487208	0.14962		0.54563	0.180589	0.616093		0.54563	0	0.492964		0.54563	1	0.839506		0.54563	0.597412	0.496599		0.54563	0	0.0748383		0.54563	0.114018	0.200151
		0.65476	0	0.2666		0.65476	0.200915	0.448714		0.65476	0.0609097	0.230329		0.65476	0.0370594	0.209112		0.65476	0.18338	0.0831429		0.65476	0.430448	0.110468		0.65476	0.189604	0.531637		0.65476	0.0743761	0.489751		0.65476	0.924946	0.931805		0.65476	0.677998	0.621191		0.65476	0.00717211	0.0801698		0.65476	0.268433	0.17312
		0.76389	0.0206827	0.161159		0.76389	0.16029	0.367837		0.76389	0.0315012	0.347971		0.76389	0	0.219164		0.76389	0.196752	0.0967134		0.76389	0.392212	0.0937808		0.76389	0.16768	0.529019		0.76389	0.0717442	0.478752		0.76389	0.90956	0.87689		0.76389	0.600755	0.625624		0.76389	0.0484494	0.174622		0.76389	0.229952	0.160071
		0.87302	0.0391294	0		0.87302	0.245434	0.397574		0.87302	0.0167984	0.379048		0.87302	0.0712203	0.195901		0.87302	0.244228	0.13662		0.87302	0.341078	0.124332		0.87302	0.119053	0.353981		0.87302	0.123196	0.354578		0.87302	0.748942	0.806592		0.87302	0.556664	0.454459		0.87302	0.056867	0.204956		0.87302	0.270819	0.244683
		0.98214	0.086578	0.144214		0.98214	0.327436	0.522921		0.98214	0.0796008	0.273641		0.98214	0.0961525	0.140396		0.98214	0.322858	0.117275		0.98214	0.238881	0.0550361		0.98214	0.0587147	0.254816		0.98214	0.198968	0.383817		0.98214	0.572003	0.612232		0.98214	0.618874	0.369584		0.98214	0.106526	0.221139		0.98214	0.127994	0.201239
		1.09127	0.109409	0.166524		1.09127	0.340456	0.494495		1.09127	0.0706918	0.284093		1.09127	0.0641574	0.0470154		1.09127	0.382127	0.127735		1.09127	0.195525	0.0867497		1.09127	0.101073	0.238115		1.09127	0.389865	0.367253		1.09127	0.402835	0.521496		1.09127	0.611726	0.31498		1.09127	0.125708	0.234286		1.09127	0.25707	0.143171
		1.2004	0.241438	0.0366442		1.2004	0.282364	0.322327		1.2004	0.113203	0.373905		1.2004	0.085375	0.0447608		1.2004	0.393058	0.109403		1.2004	0.249675	0.0913365		1.2004	0.0816556	0.236333		1.2004	0.498849	0.538521		1.2004	0.312149	0.519751		1.2004	0.749236	0.28606		1.2004	0.087945	0.229489		1.2004	0.280768	0.176656
		1.30952	0.350533	0.157102		1.30952	0.399792	0.225434		1.30952	0.146352	0.302056		1.30952	0.193251	0.0424963		1.30952	0.410504	0.190896		1.30952	0.185932	0.0791592		1.30952	0.0985367	0.241374		1.30952	0.705884	0.656278		1.30952	0.297089	0.629843		1.30952	0.814273	0.23527		1.30952	0.0888832	0.287842		1.30952	0.342263	0.165794
		1.41865	0.425616	0.228829		1.41865	0.536162	0.327863		1.41865	0.200781	0.367295		1.41865	0.331887	0.046778		1.41865	0.462476	0.16855		1.41865	0.246249	0.0811086		1.41865	0.215748	0.220031		1.41865	0.930001	0.784932		1.41865	0.322628	0.611713		1.41865	0.781563	0.232977		1.41865	0.0395545	0.260268		1.41865	0.277011	0.193773
		1.52778	0.399273	0.268691		1.52778	0.701711	0.413801		1.52778	0.303458	0.458019		1.52778	0.537095	0		1.52778	0.546129	0.141473		1.52778	0.287892	0.0815854		1.52778	0.311153	0.217981		1.52778	0.996354	0.732499		1.52778	0.383717	0.66974		1.52778	0.764795	0.123761		1.52778	0.0916782	0.253491		1.52778	0.208082	0.2322
		1.6369	0.32675	0.188109		1.6369	0.680341	0.256774		1.6369	0.429703	0.408757		1.6369	0.685226	0.0631758		1.6369	0.530108	0.187053		1.6369	0.382498	0.0762502		1.6369	0.414158	0.149147		1.6369	1	0.863656		1.6369	0.405376	0.779287		1.6369	0.799614	0.0643054		1.6369	0.21702	0.30694		1.6369	0.115894	0.258434
		1.74603	0.272555	0.359053		1.74603	0.845471	0.383948		1.74603	0.411239	0.441925		1.74603	0.873104	0.0679471		1.74603	0.573864	0.149475		1.74603	0.422887	0.12611		1.74603	0.502557	0.189689		1.74603	0.925752	0.918617		1.74603	0.461292	0.808363		1.74603	0.826905	0.0995609		1.74603	0.36463	0.426585		1.74603	0.149904	0.243046
		1.85516	0.331591	0.370051		1.85516	0.924781	0.367042		1.85516	0.557611	0.428829		1.85516	0.849894	0.125761		1.85516	0.520472	0.13344		1.85516	0.485925	0.04511		1.85516	0.531633	0.246756		1.85516	0.802336	0.917201		1.85516	0.420102	0.772397		1.85516	0.804223	0.138263		1.85516	0.710778	0.553346		1.85516	0.184859	0.346311
		1.96429	0.240725	0.294619		1.96429	0.867362	0.179225		1.96429	0.55544	0.383756		1.96429	0.660689	0.129205		1.96429	0.487605	0.0903828		1.96429	0.625034	0.0851744		1.96429	0.627372	0.26477		1.96429	0.709409	1		1.96429	0.425416	0.693345		1.96429	0.78308	0.13984		1.96429	1	0.717768		1.96429	0.206126	0.423957
		2.07341	0.279469	0.265211		2.07341	1	0.308253		2.07341	0.543894	0.414996		2.07341	0.570881	0.115192		2.07341	0.484488	0.240214		2.07341	0.689802	0.0868563		2.07341	0.541699	0.321429		2.07341	0.728259	0.949207		2.07341	0.4546	0.593522		2.07341	0.717931	0.113945		2.07341	0.99476	0.845442		2.07341	0.196426	0.439712
		2.18254	0.296661	0.371946		2.18254	0.819339	0.464139		2.18254	0.669116	0.456877		2.18254	0.397804	0.112092		2.18254	0.527459	0.167308		2.18254	0.650255	0.145385		2.18254	0.501481	0.240732		2.18254	0.733306	0.77116		2.18254	0.473705	0.462412		2.18254	0.814992	0.205085		2.18254	0.861896	0.860466		2.18254	0.352739	0.515157
		2.29167	0.340972	0.613701		2.29167	0.712078	0.422509		2.29167	0.643429	0.538021		2.29167	0.417525	0.0854993		2.29167	0.533884	0.225025		2.29167	0.661514	0.184834		2.29167	0.532093	0.351534		2.29167	0.781213	0.681461		2.29167	0.471987	0.381615		2.29167	0.861324	0.163653		2.29167	0.668386	0.825485		2.29167	0.383032	0.551243
		2.40079	0.363211	0.652512		2.40079	0.760289	0.570285		2.40079	0.717996	0.504794		2.40079	0.463254	0.12161		2.40079	0.500012	0.250454		2.40079	0.6969	0.217406		2.40079	0.628712	0.338411		2.40079	0.782453	0.672941		2.40079	0.48624	0.395573		2.40079	0.656764	0.21033		2.40079	0.605145	0.866924		2.40079	0.551414	0.677486
		2.50992	0.447435	0.7176		2.50992	0.72141	0.647161		2.50992	0.734045	0.474014		2.50992	0.438443	0.115845		2.50992	0.557191	0.283616		2.50992	0.637401	0.181971		2.50992	0.679007	0.379115		2.50992	0.764674	0.621481		2.50992	0.497065	0.423868		2.50992	0.737302	0.292789		2.50992	0.48113	0.879433		2.50992	0.713861	0.816195
		2.61905	0.568415	0.818784		2.61905	0.734588	0.653335		2.61905	0.6915	0.566377		2.61905	0.438342	0.104656		2.61905	0.60888	0.287621		2.61905	0.596452	0.223188		2.61905	0.71201	0.354733		2.61905	0.675754	0.578573		2.61905	0.48808	0.409323		2.61905	0.725378	0.310808		2.61905	0.26952	0.747507		2.61905	0.748913	0.759542
		2.72817	0.663077	1		2.72817	0.751649	0.635268		2.72817	0.733451	0.64041		2.72817	0.428565	0.125205		2.72817	0.599287	0.366417		2.72817	0.489866	0.21773		2.72817	0.695408	0.336947		2.72817	0.691347	0.517177		2.72817	0.452284	0.390384		2.72817	0.783378	0.298454		2.72817	0.205916	0.681764		2.72817	0.85929	0.683762
		2.8373	0.742221	0.987766		2.8373	0.844804	0.703728		2.8373	0.825087	0.602388		2.8373	0.515425	0.189629		2.8373	0.610576	0.387601		2.8373	0.448465	0.204018		2.8373	0.656805	0.219016		2.8373	0.641775	0.676284		2.8373	0.446503	0.419347		2.8373	0.758882	0.318822		2.8373	0.142534	0.555827		2.8373	0.797436	0.785577
		2.94643	0.845979	0.832583		2.94643	0.933713	0.642597		2.94643	0.79547	0.610538		2.94643	0.594997	0.300473		2.94643	0.634356	0.404058		2.94643	0.381423	0.236824		2.94643	0.566163	0.250588		2.94643	0.58656	0.68952		2.94643	0.390851	0.340901		2.94643	0.940265	0.435069		2.94643	0.204657	0.544152		2.94643	0.942399	0.921962
		3.05556	0.869036	0.85791		3.05556	0.948212	0.847755		3.05556	0.839996	0.58761		3.05556	0.703583	0.468258		3.05556	0.599422	0.486955		3.05556	0.414512	0.291594		3.05556	0.540376	0.304881		3.05556	0.632479	0.585209		3.05556	0.335868	0.361757		3.05556	0.790783	0.562693		3.05556	0.357262	0.596645		3.05556	1	1
		3.16468	0.888611	0.859084		3.16468	0.954249	0.857923		3.16468	0.979748	0.624263		3.16468	0.921823	0.639187		3.16468	0.574175	0.488319		3.16468	0.42643	0.334103		3.16468	0.485508	0.244393		3.16468	0.632113	0.559233		3.16468	0.356628	0.40865		3.16468	0.75532	0.790417		3.16468	0.48772	0.529156		3.16468	0.885929	0.928094
		3.27381	0.990527	0.93274		3.27381	0.912872	1		3.27381	1	0.696383		3.27381	0.989739	0.780456		3.27381	0.637109	0.622509		3.27381	0.436307	0.388876		3.27381	0.437273	0.455156		3.27381	0.5741	0.502503		3.27381	0.379654	0.376948		3.27381	0.746053	1		3.27381	0.417114	0.531054		3.27381	0.820885	0.790222
		3.38294	1	0.989461		3.38294	0.898319	0.732718		3.38294	0.930378	0.740685		3.38294	1	1		3.38294	0.687128	0.666409		3.38294	0.481735	0.461145		3.38294	0.469451	0.468528		3.38294	0.588899	0.613481		3.38294	0.37539	0.410221		3.38294	0.665142	0.964781		3.38294	0.380929	0.559782		3.38294	0.790419	0.595609
		3.49206	0.783884	0.874387		3.49206	0.834758	0.828566		3.49206	0.812852	0.710197		3.49206	0.884735	0.920246		3.49206	0.715377	0.648558		3.49206	0.572297	0.591341		3.49206	0.657505	0.510013		3.49206	0.568601	0.570133		3.49206	0.348888	0.461778		3.49206	0.688037	0.847858		3.49206	0.536558	0.48268		3.49206	0.607392	0.60767
		3.60119	0.793206	0.93432		3.60119	0.75781	0.75368		3.60119	0.723565	0.703142		3.60119	0.76729	0.865822		3.60119	0.804523	0.735993		3.60119	0.715889	0.68484		3.60119	0.822432	0.693707		3.60119	0.544198	0.621729		3.60119	0.338497	0.583903		3.60119	0.594655	0.783602		3.60119	0.626174	0.497982		3.60119	0.542601	0.566494
		3.71032	0.65417	0.802297		3.71032	0.662277	0.764466		3.71032	0.642496	0.683136		3.71032	0.68114	0.77587		3.71032	0.906712	0.790127		3.71032	0.885886	0.74849		3.71032	0.9133	0.889004		3.71032	0.459889	0.535268		3.71032	0.359263	0.752958		3.71032	0.58996	0.570624		3.71032	0.695934	0.553168		3.71032	0.44007	0.438604
		3.81944	0.539215	0.556374		3.81944	0.602494	0.804324		3.81944	0.612262	0.718992		3.81944	0.554027	0.657936		3.81944	0.934243	0.883038		3.81944	1	0.780753		3.81944	1	0.940637		3.81944	0.503971	0.530803		3.81944	0.398717	0.933022		3.81944	0.68381	0.396286		3.81944	0.792623	0.612811		3.81944	0.455855	0.402856
		3.92857	0.456942	0.557835		3.92857	0.452402	0.693988		3.92857	0.711729	0.666674		3.92857	0.442252	0.589324		3.92857	1	0.960653		3.92857	0.957812	0.7505		3.92857	0.993779	1		3.92857	0.476016	0.512306		3.92857	0.398908	1		3.92857	0.607105	0.38155		3.92857	0.715034	0.664913		3.92857	0.43473	0.287269
		4.0377	0.462576	0.562489		4.0377	0.381166	0.737276		4.0377	0.74572	0.782643		4.0377	0.362394	0.473442		4.0377	0.89884	0.966992		4.0377	0.867118	0.751337		4.0377	0.840049	0.993565		4.0377	0.4459	0.361032		4.0377	0.458205	0.921711		4.0377	0.810329	0.405641		4.0377	0.780522	0.687952		4.0377	0.504196	0.290678
		4.14683	0.312809	0.460275		4.14683	0.364087	0.610958		4.14683	0.745484	0.958872		4.14683	0.296694	0.358946		4.14683	0.736068	1		4.14683	0.806288	0.858739		4.14683	0.550251	0.961988		4.14683	0.480201	0.299481		4.14683	0.444965	0.736759		4.14683	0.9425	0.357928		4.14683	0.691668	0.760404		4.14683	0.628912	0.170903
		4.25595	0.161183	0.372356		4.25595	0.424651	0.49171		4.25595	0.861492	0.826441		4.25595	0.200585	0.262167		4.25595	0.611849	0.860041		4.25595	0.697117	0.92861		4.25595	0.434078	0.746448		4.25595	0.499874	0.255517		4.25595	0.383	0.561137		4.25595	1	0.340386		4.25595	0.626151	0.848723		4.25595	0.561828	0.132841
		4.36508	0.0987989	0.28207		4.36508	0.301053	0.46598		4.36508	0.855349	1		4.36508	0.202924	0.181184		4.36508	0.549112	0.72672		4.36508	0.65462	0.994588		4.36508	0.361184	0.634177		4.36508	0.559643	0.0976862		4.36508	0.410351	0.443543		4.36508	0.866232	0.355676		4.36508	0.771542	0.991524		4.36508	0.452325	0.123818
		4.47421	0.154588	0.407077		4.47421	0.358542	0.340348		4.47421	0.911014	0.815214		4.47421	0.154894	0.140478		4.47421	0.506779	0.649297		4.47421	0.561344	1		4.47421	0.27161	0.484281		4.47421	0.548418	0.0632486		4.47421	0.367833	0.278883		4.47421	0.760665	0.328662		4.47421	0.702991	1		4.47421	0.417521	0.0882609
		4.58333	0.101312	0.196219		4.58333	0.313991	0.523709		4.58333	0.852231	0.746083		4.58333	0.138631	0.1156		4.58333	0.453265	0.498099		4.58333	0.459352	0.959451		4.58333	0.250553	0.465894		4.58333	0.624521	0.0666753		4.58333	0.361491	0.258171		4.58333	0.686648	0.298693		4.58333	0.591271	0.886742		4.58333	0.400672	0.117405
		4.69246	0.0729014	0.156434		4.69246	0.158824	0.404169		4.69246	0.717421	0.733866		4.69246	0.093554	0.060449		4.69246	0.38339	0.435815		4.69246	0.389915	0.786243		4.69246	0.244701	0.47758		4.69246	0.53957	0.0471902		4.69246	0.354822	0.105615		4.69246	0.601883	0.216382		4.69246	0.571726	0.632256		4.69246	0.297311	0.155703
		4.80159	0.255577	0.199197		4.80159	0.104211	0.463188		4.80159	0.571478	0.609874		4.80159	0.105635	0.0770471		4.80159	0.340487	0.345488		4.80159	0.319625	0.630715		4.80159	0.212203	0.438892		4.80159	0.577986	0		4.80159	0.333443	0.102041		4.80159	0.61056	0.251818		4.80159	0.594413	0.414515		4.80159	0.207936	0.126417
		4.91071	0.134937	0.172491		4.91071	0.101427	0.61559		4.91071	0.471904	0.514074		4.91071	0.0410508	0.0939838		4.91071	0.301592	0.288678		4.91071	0.221366	0.524127		4.91071	0.193898	0.389934		4.91071	0.611017	0.00960472		4.91071	0.320115	0.0537598		4.91071	0.57168	0.122881		4.91071	0.51839	0.373818		4.91071	0.21411	0.0841642
		5.01984	0.111771	0.369277		5.01984	0	0.670833		5.01984	0.474391	0.383938		5.01984	0.0448029	0.11582		5.01984	0.312285	0.216739		5.01984	0.172559	0.336891		5.01984	0.210938	0.438287		5.01984	0.53225	0.0548027		5.01984	0.22558	0.0393527		5.01984	0.552075	0.0721145		5.01984	0.435815	0.333309		5.01984	0.153506	0.05716
		5.12897	0.222816	0.39701		5.12897	0.0419134	0.613478		5.12897	0.281201	0.306572		5.12897	0.0801261	0.217881		5.12897	0.213878	0.0655905		5.12897	0.123221	0.221076		5.12897	0.176805	0.243251		5.12897	0.461502	0.0236307		5.12897	0.179555	0.050407		5.12897	0.523507	0.0456104		5.12897	0.268683	0.339535		5.12897	0.258773	0.0518875
		5.2381	0.3268	0.491153		5.2381	0.0399328	0.360983		5.2381	0.207693	0.229247		5.2381	0.133941	0.242511		5.2381	0.142127	0.0427588		5.2381	0.0935687	0.157222		5.2381	0.174342	0.31734		5.2381	0.439679	0.142537		5.2381	0.0990532	0.00802508		5.2381	0.421128	0.00365206		5.2381	0.300735	0.320603		5.2381	0.170759	0.0369425
		5.34722	0.419071	0.745958		5.34722	0.0569458	0.322687		5.34722	0.213027	0.154721		5.34722	0.15592	0.255133		5.34722	0.146128	0.0683185		5.34722	0.0235873	0.101019		5.34722	0.087082	0.232603		5.34722	0.473407	0.0719022		5.34722	0.0982815	0.0686778		5.34722	0.339004	0		5.34722	0.20162	0.308345		5.34722	0	0.092328
		5.45635	0.400972	0.828669		5.45635	0.0273731	0.164852		5.45635	0.150445	0.149204		5.45635	0.10909	0.298122		5.45635	0.115575	0.0981556		5.45635	0	0.0484274		5.45635	0.0958246	0.227793		5.45635	0.360884	0.214337		5.45635	0.122153	0.0452624		5.45635	0.297804	0.0917856		5.45635	0.25867	0.296012		5.45635	0.0479766	0.0619896
										5.56548	0.138023	0.11139						5.56548	0.104259	0.00614522		5.56548	0.0257989	0.0122276		5.56548	0.0177705	0.105322		5.56548	0.245061	0.156854		5.56548	0.0652293	0.0469849		5.56548	0.109916	0.0697978		5.56548	0.283681	0.336519		5.56548	0.151142	0.0188404
										5.6746	0.123721	0.0866016						5.6746	0.0656974	0.0713158		5.6746	0.0591591	0.0676841		5.6746	0	0.103275		5.6746	0.204079	0.104047		5.6746	0.00960829	0.0318102		5.6746	0.127152	0.0790229		5.6746	0.271207	0.307063		5.6746	0.235563	0
										5.78373	0.119512	0.149493						5.78373	0.056823	0		5.78373	0.0571102	0.0228477		5.78373	0.00802943	0.0612747		5.78373	0.141636	0.105903		5.78373	0	0.00863094		5.78373	0	0.116397		5.78373	0.207645	0.261762		5.78373	0.11931	0.0137692
										5.89286	0.0751815	0.097639						5.89286	0.024953	0.0589617		5.89286	0.015834	0		5.89286	0.121935	0.0720212		5.89286	0.19105	0.099917		5.89286	0.0427706	0.00471852		5.89286	0.0229051	0.091744		5.89286	0.158852	0.243117		5.89286	0.176791	0.0173075
																		6.00198	0	0.0606529		6.00198	0.0370699	0.0630711		6.00198	0.262154	0.00701877		6.00198	0.217627	0.175543		6.00198	0.0323323	0		6.00198	0.0250397	0.0695036		6.00198	0.211574	0.267004		6.00198	0.18308	0.0528647
																		6.11111	0.0458477	0.0729607		6.11111	0.0561191	0.0895138		6.11111	0.517217	0		6.11111	0.197015	0.128818		6.11111	0.0655415	0.0814137		6.11111	0.21231	0.155055		6.11111	0.199953	0.182721		6.11111	0.290286	0.0324243
																										6.22024	0.739037	0.0854862		6.22024	0.115385	0.185449		6.22024	0.121219	0.12023		6.22024	0.00243264	0.162901		6.22024	0.348828	0.180234		6.22024	0.17138	0.134586
																										6.32937	0.862719	0.126407		6.32937	0.0405316	0.150946		6.32937	0.151892	0.125531
																										6.43849	0.937638	0.229812		6.43849	0.0809398	0.15027		6.43849	0.292169	0.256194
																														6.54762	0.026641	0.115703
																														6.65675	0.0811614	0.232165
[truncated: 3 more columns]

## Sheet: exp1-endosome7
endosome 7		t22				t23				t24				t25				t26				t27				t28				t29				t30				t31				t32				t33
line profiles			Rab5	Snx1			Rab5	Snx1			Rab5	Snx1			Rab5	Snx1			Rab5	Snx1			Rab5	Snx1			Rab5	Snx1			Rab5	Snx1			Rab5	Snx1			Rab5	Snx1			Rab5	Snx1			Rab5	Snx1
		0	891.765	371.937		0	862.6	441.294		0	822.851	431.896		0	861.893	399.357		0	910.849	486.515		0	919.452	431.92		0	814.756	411.256		0	1028.3	426.076		0	826.566	456.231		0	1206.32	527.436		0	814.45	481.128		0	757.843	435.152
		0.10913	915.095	376.575		0.10913	868.488	442.987		0.10913	828.41	425.611		0.10913	862.527	413.792		0.10913	918.237	483.454		0.10913	941.989	411.988		0.10913	829.208	400.479		0.10913	994.191	427.635		0.10913	835.195	427.573		0.10913	1228.09	552.737		0.10913	839.544	466.084		0.10913	751.051	445.906
		0.21825	922.558	364.603		0.21825	858.862	437.1		0.21825	831.022	420.116		0.21825	850.638	444.388		0.21825	947.09	475.53		0.21825	935.046	404.776		0.21825	773.435	377.251		0.21825	974.731	417.8		0.21825	810.808	404.193		0.21825	1220.45	566.763		0.21825	880.881	463.759		0.21825	742.535	430.083
		0.32738	907.325	360.557		0.32738	842.966	447.06		0.32738	816.409	413.827		0.32738	865.111	480.984		0.32738	987.389	462.963		0.32738	925.266	414.476		0.32738	800.967	355.462		0.32738	938.06	392.628		0.32738	799.78	376.777		0.32738	1218.27	569.376		0.32738	893.148	476.695		0.32738	724.274	417.403
		0.43651	892.398	358.19		0.43651	837.068	474.96		0.43651	819.524	409.684		0.43651	919.673	501.94		0.43651	965.634	454.806		0.43651	915.092	406.497		0.43651	768.606	362.978		0.43651	904.412	392.913		0.43651	801.228	366.872		0.43651	1199.59	562.114		0.43651	890.014	500.895		0.43651	763.966	428.723
		0.54563	886.573	349.414		0.54563	844.138	494.659		0.54563	803.616	419.855		0.54563	990.198	488.374		0.54563	908.366	428.999		0.54563	942.551	401.718		0.54563	763.478	333.373		0.54563	895.583	392.986		0.54563	786.577	371.445		0.54563	1116.6	519.213		0.54563	931.472	513.029		0.54563	781.564	435.403
		0.65476	934.5	358.804		0.65476	847.486	465.95		0.65476	799.854	431.973		0.65476	1005.43	490.86		0.65476	854.165	391.95		0.65476	940.638	395.904		0.65476	731.598	338.915		0.65476	914.787	408.276		0.65476	773.176	367.139		0.65476	1037.31	467.978		0.65476	996.151	484.133		0.65476	776.194	442.634
		0.76389	939.798	345.299		0.76389	846.782	472.84		0.76389	803.056	436.98		0.76389	958.762	493.527		0.76389	824.169	404.834		0.76389	943.19	399.285		0.76389	707.179	341.021		0.76389	903.352	438.803		0.76389	797.305	365.843		0.76389	1008.11	432.252		0.76389	1006.03	447.528		0.76389	737.915	438.497
		0.87302	874.795	349.814		0.87302	817.301	423.213		0.87302	804.665	430.534		0.87302	920.432	471.694		0.87302	828.886	394.446		0.87302	927.656	372.309		0.87302	709.149	329.417		0.87302	876.201	448.452		0.87302	788.185	363.82		0.87302	972.924	404.876		0.87302	943.165	422.617		0.87302	741.711	402.211
		0.98214	841.58	344.138		0.98214	806.744	388.195		0.98214	805.049	397.34		0.98214	876.52	462.494		0.98214	836.458	383.885		0.98214	860.587	351.395		0.98214	684.601	335.274		0.98214	841.573	450.862		0.98214	783.165	375.404		0.98214	991.263	389.772		0.98214	918.763	401.608		0.98214	774.607	388.281
		1.09127	832.117	352.073		1.09127	789.772	366.169		1.09127	816.691	370.275		1.09127	817.224	445.851		1.09127	878.055	409.104		1.09127	784.668	368.785		1.09127	671.363	321.767		1.09127	810.943	431.969		1.09127	801.566	386.54		1.09127	1012.86	406.396		1.09127	861.851	394.133		1.09127	793.035	383.823
		1.2004	794.054	347.498		1.2004	780.915	360.939		1.2004	841.937	376.447		1.2004	793.76	413.198		1.2004	876.616	405.63		1.2004	748.941	381.042		1.2004	667.312	332.414		1.2004	810.266	387.184		1.2004	809.353	402.19		1.2004	1043.4	408.37		1.2004	856.497	380.883		1.2004	819.819	371.997
		1.30952	824.093	358.013		1.30952	766.428	358.338		1.30952	851.281	386.451		1.30952	789.64	386.21		1.30952	850.326	414.663		1.30952	769.399	394.101		1.30952	670.267	327.687		1.30952	799.937	381.909		1.30952	838.327	413.559		1.30952	1068.92	396.02		1.30952	836.501	379.136		1.30952	808.34	365.408
		1.41865	872.597	371.39		1.41865	751.398	352.223		1.41865	853.653	378.903		1.41865	744.222	404.975		1.41865	843.167	431.094		1.41865	762.473	380.871		1.41865	642.552	319.602		1.41865	808.161	372.859		1.41865	875.35	426.165		1.41865	1025.42	403.459		1.41865	846.23	368.168		1.41865	809.978	343.198
		1.52778	933.369	369.716		1.52778	745.355	347.463		1.52778	843.503	369.524		1.52778	743.006	403.93		1.52778	841.995	414.917		1.52778	768.788	366.758		1.52778	647.063	310.049		1.52778	840.276	369.867		1.52778	842.883	397.222		1.52778	957.124	416.523		1.52778	857.642	344.878		1.52778	812.539	341.07
		1.6369	988.524	362.967		1.6369	750.31	346.079		1.6369	825.597	362.675		1.6369	767.371	412.539		1.6369	812.966	371.553		1.6369	756.121	345.938		1.6369	645.635	321.667		1.6369	862.469	365.98		1.6369	793.899	388.17		1.6369	907.442	429.529		1.6369	841.019	340.574		1.6369	803.782	344.434
		1.74603	1035.21	355.785		1.74603	730.078	336.528		1.74603	787.17	370.489		1.74603	769.319	405.616		1.74603	783.521	347.061		1.74603	701.497	313.969		1.74603	629.964	310.271		1.74603	827.03	361.845		1.74603	738.683	390.919		1.74603	886.032	412.284		1.74603	833.871	334.18		1.74603	838.789	334.41
		1.85516	1038.8	338.502		1.85516	742.105	325.903		1.85516	767.738	362.821		1.85516	776.391	391.197		1.85516	759.603	342.339		1.85516	687.18	300.991		1.85516	632.677	329.966		1.85516	779.337	368.063		1.85516	700.974	380.759		1.85516	872.449	404.144		1.85516	801.254	331.12		1.85516	861.604	335.727
		1.96429	992.18	336.595		1.96429	757.346	322.303		1.96429	746.068	371.196		1.96429	776.555	349.469		1.96429	736.519	336.536		1.96429	697.118	321.853		1.96429	623.673	303.235		1.96429	732.617	359.193		1.96429	682.374	372.307		1.96429	869.599	393.074		1.96429	749.503	339.269		1.96429	896.725	344.454
		2.07341	934.428	331.953		2.07341	771.192	333.4		2.07341	726.582	360.64		2.07341	791.231	349.469		2.07341	719.856	325.593		2.07341	669.765	334.728		2.07341	633.549	319.428		2.07341	697.767	343.046		2.07341	676.878	357.284		2.07341	916.781	404.85		2.07341	755.788	340.721		2.07341	964.687	346.885
		2.18254	852.103	314.023		2.18254	758.341	338.669		2.18254	752.887	366.925		2.18254	791.23	350.597		2.18254	706.996	327.249		2.18254	669.946	351.411		2.18254	620.788	311.069		2.18254	672.051	324.048		2.18254	668.946	366.623		2.18254	935.653	408.398		2.18254	740.822	322.425		2.18254	989.371	352.696
		2.29167	826.623	315.205		2.29167	769.827	321.842		2.29167	745.155	371.08		2.29167	796.423	340.084		2.29167	702.538	329.325		2.29167	675.152	354.404		2.29167	629.209	322.135		2.29167	669.073	311.363		2.29167	662.84	345.711		2.29167	986.079	395.744		2.29167	722.889	328.212		2.29167	968.98	364.882
		2.40079	801.674	316.145		2.40079	791.352	347.573		2.40079	744.815	356.984		2.40079	827.586	335.151		2.40079	694.401	324.358		2.40079	687.457	344.002		2.40079	624.425	307.403		2.40079	658.434	307.214		2.40079	661.756	330.761		2.40079	993.239	417.394		2.40079	709.031	344.305		2.40079	931.66	363.542
		2.50992	791.359	327.164		2.50992	823.897	342.982		2.50992	752.244	375.42		2.50992	829.206	329.236		2.50992	688.114	330.141		2.50992	661.282	339.77		2.50992	630.4	314.864		2.50992	669.302	309.522		2.50992	674.973	339.303		2.50992	1013.31	432.745		2.50992	698.523	364.984		2.50992	865.031	388.406
		2.61905	772.809	321.497		2.61905	838.038	326.477		2.61905	760.533	363.106		2.61905	844.536	340.087		2.61905	748.097	328.04		2.61905	656.857	338.902		2.61905	654.104	326.719		2.61905	655.912	298.533		2.61905	708.213	362.626		2.61905	1008	426.394		2.61905	699.029	380.451		2.61905	845.278	391.431
		2.72817	800.525	315.733		2.72817	855.184	349.869		2.72817	762.592	365.32		2.72817	817.779	342.336		2.72817	784.058	344.675		2.72817	659.71	343.599		2.72817	643.368	335.439		2.72817	637.667	317.306		2.72817	699.491	368.248		2.72817	1026.4	415.219		2.72817	725.817	416.98		2.72817	815.259	404.088
		2.8373	799.776	327.21		2.8373	836.122	372.07		2.8373	782.763	373.153		2.8373	849.441	345.087		2.8373	899.127	338.985		2.8373	676.168	334.846		2.8373	651.583	327.341		2.8373	640.981	317.872		2.8373	722.793	373.361		2.8373	1094.13	417.508		2.8373	750.157	429.193		2.8373	748.42	422.861
		2.94643	821.646	319.428		2.94643	846.343	380.496		2.94643	867.525	370.334		2.94643	897.869	334.241		2.94643	1014.33	333.577		2.94643	681.135	341.687		2.94643	680.953	338.056		2.94643	673.127	330.191		2.94643	739.427	379.246		2.94643	1098.12	406.492		2.94643	810.646	428.237		2.94643	761.6	451.476
		3.05556	831.519	324.626		3.05556	869.055	396.187		3.05556	956.386	365.751		3.05556	984.234	342.137		3.05556	1062.57	342.86		3.05556	696.643	338.081		3.05556	700.961	344.715		3.05556	707.122	319.408		3.05556	775.819	386.03		3.05556	1086.9	441.988		3.05556	820.727	411.147		3.05556	803.884	479.717
		3.16468	864.84	353.451		3.16468	886.785	383.998		3.16468	987.965	357.686		3.16468	1076.72	362.704		3.16468	1013.72	352.427		3.16468	712.117	323.825		3.16468	722.34	383.554		3.16468	723.909	328.542		3.16468	804.445	385.847		3.16468	1060.76	472.465		3.16468	835.977	421.753		3.16468	801.496	525.786
		3.27381	870.959	341.613		3.27381	918.475	376.883		3.27381	1018.98	385.878		3.27381	1142.91	373.388		3.27381	942.585	357.319		3.27381	721.212	323.361		3.27381	728.578	376.514		3.27381	726.864	330.56		3.27381	853.158	379.979		3.27381	1035.37	489.142		3.27381	821.993	441.526		3.27381	833.841	550.054
		3.38294	854.207	346.035		3.38294	954.556	376.856		3.38294	1023.48	400.285		3.38294	1134.71	378.978		3.38294	891.312	366.669		3.38294	747.694	346.918		3.38294	732.636	365.93		3.38294	767.893	314.708		3.38294	878.894	372.732		3.38294	1023.36	498.811		3.38294	862.592	491.614		3.38294	851.382	597.485
		3.49206	871.279	339.276		3.49206	915.595	380.625		3.49206	1052.31	387.817		3.49206	1073.56	375.606		3.49206	848.535	362.547		3.49206	748.527	356.735		3.49206	732.288	344.213		3.49206	777.522	338.155		3.49206	904.774	384.4		3.49206	1005.73	500.654		3.49206	935.073	514.817		3.49206	846.859	626.299
		3.60119	864.313	336.743		3.60119	883.716	365.159		3.60119	1064.72	378.091		3.60119	1003.21	373.382		3.60119	829.775	347.133		3.60119	775.608	367.419		3.60119	756.957	333.294		3.60119	835.281	327.219		3.60119	911.814	392.955		3.60119	1016.05	494.659		3.60119	1033.85	534.743		3.60119	857.625	622.316
		3.71032	878.12	346.877		3.71032	875.552	358.499		3.71032	1063.78	396.856		3.71032	968.987	373.594		3.71032	824.609	340.957		3.71032	819.887	371.728		3.71032	751.447	342.539		3.71032	882.879	350.303		3.71032	962.048	380.717		3.71032	1060.98	525.134		3.71032	1219.02	566.842		3.71032	874.535	588.702
		3.81944	898.942	350.733		3.81944	848.073	349.871		3.81944	1086.15	399.654		3.81944	998.613	359.777		3.81944	825.531	343.99		3.81944	827.713	380.118		3.81944	792.556	339.859		3.81944	894.299	337.579		3.81944	962.552	393.433		3.81944	1099.94	525.998		3.81944	1361.47	594.372		3.81944	871.73	552.328
		3.92857	919.75	344.226		3.92857	841.078	351.069		3.92857	1040.8	389.273		3.92857	982.147	349.832		3.92857	845.192	346.803		3.92857	826.047	364.27		3.92857	854.627	349.363		3.92857	874.351	340.154		3.92857	988.692	385.604		3.92857	1124.96	550.038		3.92857	1326.39	597.953		3.92857	886.209	526.673
		4.0377	922.212	340.308		4.0377	882.562	361.926		4.0377	1037.79	383.384		4.0377	1004.01	358.401		4.0377	852.124	343.663		4.0377	840.522	349.039		4.0377	882.239	366.617		4.0377	893.127	361.356		4.0377	1020.91	433.181		4.0377	1228.01	559.898		4.0377	1203.9	579.37		4.0377	898.268	478.945
		4.14683	924.964	352.772		4.14683	878.977	378.777		4.14683	996.779	391.548		4.14683	1026.92	351.752		4.14683	853.8	328.315		4.14683	852.868	346.252		4.14683	886.56	385.495		4.14683	882.409	347.358		4.14683	1002.42	416.412		4.14683	1287.18	545.014		4.14683	1090.52	573.951		4.14683	904.635	462.85
		4.25595	944.453	355.476		4.25595	862.786	377.964		4.25595	983.447	395.122		4.25595	1064.39	351.35		4.25595	858.342	346.365		4.25595	862.156	354.246		4.25595	932.022	392.91		4.25595	864.435	336.593		4.25595	1021.75	421.355		4.25595	1256.58	544.37		4.25595	985.845	546.761		4.25595	981.22	462.533
		4.36508	924.74	354.073		4.36508	892.573	385.335		4.36508	979.883	403.993		4.36508	1024.89	355.972		4.36508	871.925	362.074		4.36508	871.156	357.943		4.36508	924.716	410.354		4.36508	887.052	342.11		4.36508	1055.52	403.306		4.36508	1255.59	519.888		4.36508	916.801	515.382		4.36508	997.283	508.107
		4.47421	920.629	360.643		4.47421	927.188	389.409		4.47421	1009.29	417.842		4.47421	1009.2	383.492		4.47421	870.235	359.125		4.47421	878.176	370.874		4.47421	902.472	413.54		4.47421	922.716	331.63		4.47421	1066.82	384.037		4.47421	1214.12	504.585		4.47421	907.983	494.771		4.47421	1027.21	504.299
		4.58333	925.473	365.035		4.58333	919.806	407.35		4.58333	1001.8	424.146		4.58333	1032.02	370.446		4.58333	903.354	362.448		4.58333	915.903	375.311		4.58333	887.606	404.332		4.58333	926.907	353.626		4.58333	1001.52	390.746		4.58333	1150.9	490.57		4.58333	895.517	470.239		4.58333	1016.92	505.527
		4.69246	896.117	367.543		4.69246	909.98	433.681		4.69246	1016.78	443.726		4.69246	1040.91	381.543		4.69246	941.824	370.736		4.69246	925.451	369.12		4.69246	914.343	383.935		4.69246	963.987	344.144		4.69246	1000.13	386.833		4.69246	1157.56	488.432		4.69246	891.346	468.085		4.69246	1011.76	501.092
		4.80159	903.206	367.985		4.80159	909.767	431.232		4.80159	1019.41	436.703		4.80159	1029.65	391.729		4.80159	921.599	373.911		4.80159	895.047	394.588		4.80159	910.912	385.129		4.80159	975.34	343.73		4.80159	937.875	380.42		4.80159	1147.6	474.885		4.80159	909.428	467.229		4.80159	990.649	492.942
		4.91071	913.541	371.067		4.91071	901.197	426.117		4.91071	1022.21	446.265		4.91071	1011.54	416.274		4.91071	896.577	367.557		4.91071	882.077	369.404		4.91071	901.099	377.686		4.91071	978.858	356.457		4.91071	947.262	378.826		4.91071	1110.14	477.15		4.91071	911.259	484.729		4.91071	983.766	491.892
		5.01984	904.094	369.05		5.01984	891.951	407.957		5.01984	988.87	442.18		5.01984	1042.47	403.243		5.01984	898.781	371.21		5.01984	885.865	373.743		5.01984	923.291	392.327		5.01984	956.436	349.316		5.01984	958.257	383.003		5.01984	1157.46	481.243		5.01984	932.788	490.698		5.01984	923.478	485.066
		5.12897	890.242	382.317		5.12897	892.007	401.232		5.12897	943.974	445.422		5.12897	1005.25	409.161		5.12897	891.733	381.129		5.12897	838.744	347.332		5.12897	935.178	400.6		5.12897	967.2	340.59		5.12897	981.929	375.373		5.12897	1164.01	492.847		5.12897	894.917	490.019		5.12897	889.716	465.609
		5.2381	899.351	391.475		5.2381	906.244	396.725		5.2381	929.924	436.539		5.2381	954.509	387.299		5.2381	894.626	367.144		5.2381	845.899	379.158		5.2381	892.209	426.01		5.2381	970.98	346.368		5.2381	959.731	407.055		5.2381	1161.33	505.857		5.2381	897.717	493.056		5.2381	878.494	478.928
		5.34722	903.177	413.572		5.34722	945.569	415.184		5.34722	925.285	429.51		5.34722	936.508	398.693		5.34722	861.515	358.224		5.34722	870.659	387.907		5.34722	887.997	434.493		5.34722	952.324	362.847		5.34722	963.558	426.393		5.34722	1186.9	521.443		5.34722	886.747	489.538		5.34722	871.192	478.288
		5.45635	903.216	451.931		5.45635	979.105	416.53		5.45635	884.547	426.023		5.45635	937.073	373.938		5.45635	895.742	357.186		5.45635	898.016	403.14		5.45635	882.579	432.681		5.45635	968.235	365.182		5.45635	1007.43	416.351		5.45635	1142.87	529.715		5.45635	897.32	515.738		5.45635	852.492	479.537
		5.56548	882.789	471.887		5.56548	957.507	439.914		5.56548	888.505	420.288		5.56548	921.755	385.359		5.56548	892.947	355.734		5.56548	865.885	401.955		5.56548	895.567	441.479		5.56548	1014.59	376.515		5.56548	1050.24	429.1		5.56548	1179.66	574.872		5.56548	926.931	530.08		5.56548	869.16	545.393
		5.6746	887.922	443.926		5.6746	977.845	454.769		5.6746	839.681	417.206		5.6746	919.038	398.413		5.6746	895.186	353.755		5.6746	863.376	420.596		5.6746	895	439.054		5.6746	1059.92	384.038		5.6746	1064.58	465.918		5.6746	1223.37	620.746		5.6746	967.973	535.404		5.6746	902.34	561.933
		5.78373	893.36	417.129		5.78373	962.55	461.905		5.78373	840.417	422.137		5.78373	901.023	395.737		5.78373	915.42	366.221		5.78373	879.479	435.165		5.78373	883.712	433.248		5.78373	1068.04	381.184		5.78373	1085.04	490.123		5.78373	1228.26	640.82		5.78373	1006.23	547.727		5.78373	935.777	573.07
		5.89286	904.779	388.492		5.89286	951.273	466.607		5.89286	815.372	438.223		5.89286	899.697	398.292		5.89286	919.571	382.337		5.89286	859.974	447.356		5.89286	861.241	400.789		5.89286	1070.43	380.656		5.89286	1094.97	512.216		5.89286	1205.58	652.273		5.89286	1070.67	568.352		5.89286	982.04	624.067
		6.00198	877.485	371.989		6.00198	893.902	435.141		6.00198	825.079	437.702		6.00198	904.982	402.531		6.00198	937.14	378.94		6.00198	829.12	465.172		6.00198	887.104	399.972		6.00198	1049.08	390.14		6.00198	1077.85	504.686		6.00198	1215.85	624.661		6.00198	1125.65	583.621		6.00198	940.417	624.867
						6.11111	894.698	429.374		6.11111	798.558	429.652		6.11111	959.406	424.98		6.11111	975.133	387.166		6.11111	872.647	448.69		6.11111	863.853	373.391		6.11111	994.197	410.338		6.11111	1093.37	473.883		6.11111	1225.04	594.139		6.11111	1163.88	583.909		6.11111	988.022	618.853
						6.22024	905.79	438.771						6.22024	960.026	407.552		6.22024	948.975	388.317		6.22024	870.066	462.574		6.22024	836.143	378.805		6.22024	953.73	401.443		6.22024	1097.16	461.432		6.22024	1237.37	575.029		6.22024	1157.69	567.796		6.22024	953.199	605.335
						6.32937	898.702	428.09						6.32937	935.449	405.642		6.32937	931.481	392.085		6.32937	887.984	441.248		6.32937	825.842	368.633		6.32937	918.245	402.629		6.32937	1053.58	461.893		6.32937	1254.05	579.322		6.32937	1160.78	531.997		6.32937	930.604	584.04
						6.43849	865.47	433.758						6.43849	901.245	392.518		6.43849	906.255	410.763						6.43849	800.352	375.355		6.43849	913.542	419.558		6.43849	1033.95	469.056		6.43849	1266.65	566.836		6.43849	1075.41	498.103		6.43849	889.643	550.432
														6.54762	856.021	382.647		6.54762	891.507	427.644						6.54762	805.427	379.02		6.54762	880.523	407.852		6.54762	960.39	470.04		6.54762	1272.26	574.242		6.54762	964.058	491.238		6.54762	861.389	518.164
														6.65675	848.305	393.477		6.65675	903.809	470.169										6.65675	892.486	416.005		6.65675	928.475	469.886		6.65675	1261.87	559.715		6.65675	897.722	494.542		6.65675	804.089	481.477
																														6.76587	917.027	419.301		6.76587	899.379	479.986		6.76587	1222.66	544.204		6.76587	836.302	476.864		6.76587	764.367	482.878
																														6.875	965.71	419.968		6.875	852.927	462.129		6.875	1164.38	552.298		6.875	821.517	494.666		6.875	757.672	470.524
																														6.98413	1012.08	415.378		6.98413	821.214	454.085		6.98413	1143.61	508.164		6.98413	794.303	499.601		6.98413	741.571	459.304
																														7.09325	1027.23	420.25						7.09325	1133.56	500.119		7.09325	818.553	457.65		7.09325	748.811	452.889
																																						7.20238	1128.69	503.472		7.20238	802.031	478.406		7.20238	730.166	451.971
																																						7.31151	1177.7	493.356		7.31151	815.726	477.07		7.31151	728.57	446.271
																																						7.42063	1198.46	523.695
		t22				t23				t24				t25				t26				t27				t28				t29				t30				t31				t32				t33
			Rab5	Snx1			Rab5	Snx1			Rab5	Snx1			Rab5	Snx1			Rab5	Snx1			Rab5	Snx1			Rab5	Snx1			Rab5	Snx1			Rab5	Snx1			Rab5	Snx1			Rab5	Snx1			Rab5	Snx1
		0	0.447227	0.36686		0	0.532159	0.691205		0	0.267736	0.839051		0	0.29729	0.406018		0	0.594826	1		0	0.917097	0.797467		0	0.616966	0.781379		0	0.902657	0.837286		0	0.378525	0.691466		0	0.806357	0.524432		0	0.174865	0.575996		0	0.110811	0.345138
		0.10913	0.534938	0.39624		0.10913	0.555803	0.701002		0.10913	0.283196	0.768653		0.10913	0.298876	0.489601		0.10913	0.614556	0.981123		0.10913	0.995806	0.676065		0.10913	0.662935	0.703423		0.10913	0.82384	0.847521		0.10913	0.398343	0.533532		0.10913	0.858486	0.620817		0.10913	0.212717	0.521395		0.10913	0.0883904	0.381981
		0.21825	0.562996	0.320402		0.21825	0.517149	0.666937		0.21825	0.29046	0.707109		0.21825	0.269146	0.666759		0.21825	0.69161	0.932257		0.21825	0.971558	0.632138		0.21825	0.485534	0.535401		0.21825	0.778872	0.782957		0.21825	0.342333	0.404684		0.21825	0.84019	0.674249		0.21825	0.275071	0.512957		0.21825	0.0602793	0.327772
		0.32738	0.505726	0.294773		0.32738	0.453316	0.72457		0.32738	0.24982	0.636668		0.32738	0.305337	0.878659		0.32738	0.79923	0.854758		0.32738	0.937402	0.691219		0.32738	0.573107	0.377789		0.32738	0.694135	0.617709		0.32738	0.317004	0.253595		0.32738	0.834962	0.684203		0.32738	0.293574	0.559907		0.32738	0	0.284331
		0.43651	0.449606	0.279779		0.43651	0.429632	0.886012		0.43651	0.258483	0.59027		0.43651	0.441776	1		0.43651	0.741132	0.804455		0.43651	0.90187	0.64262		0.43651	0.470174	0.432156		0.43651	0.616382	0.61958		0.43651	0.32033	0.199008		0.43651	0.79025	0.656538		0.43651	0.288847	0.647738		0.43651	0.131023	0.323113
		0.54563	0.427707	0.224187		0.54563	0.458023	1		0.54563	0.214241	0.704186		0.54563	0.618131	0.921449		0.54563	0.588195	0.645307		0.54563	0.997768	0.613512		0.54563	0.453863	0.218006		0.54563	0.595981	0.620059		0.54563	0.286681	0.22421		0.54563	0.59149	0.493107		0.54563	0.351382	0.691777		0.54563	0.189113	0.345998
		0.65476	0.607893	0.283668		0.65476	0.471467	0.833876		0.65476	0.203778	0.839914		0.65476	0.656231	0.935844		0.65476	0.443448	0.416831		0.65476	0.991087	0.5781		0.65476	0.35246	0.258094		0.65476	0.640356	0.720434		0.65476	0.255902	0.200479		0.65476	0.401633	0.297926		0.65476	0.448945	0.586902		0.65476	0.171387	0.370771
		0.76389	0.627811	0.19812		0.76389	0.46864	0.873745		0.76389	0.212684	0.895994		0.76389	0.539522	0.951287		0.76389	0.363342	0.496284		0.76389	1	0.598693		0.76389	0.274789	0.273328		0.76389	0.613933	0.920836		0.76389	0.31132	0.193337		0.76389	0.331687	0.161828		0.76389	0.463849	0.454048		0.76389	0.0450287	0.356598
		0.87302	0.383426	0.22672		0.87302	0.350255	0.58658		0.87302	0.217158	0.823801		0.87302	0.443674	0.824868		0.87302	0.375939	0.432223		0.87302	0.945748	0.434386		0.87302	0.281055	0.18939		0.87302	0.551194	0.984179		0.87302	0.290374	0.182188		0.87302	0.247436	0.0575388		0.87302	0.36902	0.363636		0.87302	0.0575593	0.232284
		0.98214	0.258551	0.190765		0.98214	0.307862	0.383949		0.98214	0.218226	0.452011		0.98214	0.333867	0.771598		0.98214	0.396161	0.367095		0.98214	0.711514	0.307003		0.98214	0.202974	0.231757		0.98214	0.471177	1		0.98214	0.278844	0.246028		0.98214	0.291353	0		0.98214	0.332212	0.287386		0.98214	0.166148	0.18456
		1.09127	0.222974	0.24103		1.09127	0.239709	0.256497		1.09127	0.250604	0.148859		1.09127	0.18559	0.67523		1.09127	0.507248	0.522617		1.09127	0.446372	0.412922		1.09127	0.160867	0.134053		1.09127	0.400398	0.875972		1.09127	0.321106	0.307399		1.09127	0.343062	0.0633293		1.09127	0.246365	0.260257		1.09127	0.226979	0.169287
		1.2004	0.0798726	0.21205		1.2004	0.204143	0.226234		1.2004	0.320816	0.217994		1.2004	0.126916	0.486161		1.2004	0.503405	0.501193		1.2004	0.321598	0.487578		1.2004	0.147982	0.211069		1.2004	0.398834	0.581971		1.2004	0.338991	0.393646		1.2004	0.416205	0.0708493		1.2004	0.238289	0.212167		1.2004	0.315392	0.128772
		1.30952	0.192807	0.278658		1.30952	0.145968	0.211183		1.30952	0.346803	0.330043		1.30952	0.116614	0.329894		1.30952	0.433196	0.556899		1.30952	0.393046	0.567118		1.30952	0.157381	0.176876		1.30952	0.374966	0.547342		1.30952	0.405537	0.4563		1.30952	0.477316	0.0238018		1.30952	0.208127	0.205827		1.30952	0.2775	0.106198
		1.41865	0.375163	0.363395		1.41865	0.0856132	0.175799		1.41865	0.3534	0.245504		1.41865	0.00304074	0.438548		1.41865	0.414078	0.658226		1.41865	0.368857	0.486536		1.41865	0.0692261	0.118392		1.41865	0.39397	0.487931		1.41865	0.490568	0.525772		1.41865	0.373157	0.0521408		1.41865	0.222803	0.166019		1.41865	0.282908	0.0301073
		1.52778	0.603641	0.352791		1.52778	0.0613468	0.148255		1.52778	0.325172	0.140451		1.52778	0	0.432497		1.52778	0.410948	0.558465		1.52778	0.390912	0.400576		1.52778	0.0835745	0.0492897		1.52778	0.46818	0.468289		1.52778	0.416	0.366267		1.52778	0.209599	0.101908		1.52778	0.240017	0.0814908		1.52778	0.291361	0.0228169
		1.6369	0.811001	0.310039		1.6369	0.0812442	0.140247		1.6369	0.275373	0.0637336		1.6369	0.0609274	0.482346		1.6369	0.333424	0.291045		1.6369	0.346673	0.273765		1.6369	0.0790324	0.133329		1.6369	0.519462	0.442772		1.6369	0.303497	0.316381		1.6369	0.0906239	0.151455		1.6369	0.214942	0.0658699		1.6369	0.262455	0.0343418
		1.74603	0.986507	0.264544		1.74603	0	0.0849801		1.74603	0.168503	0.151256		1.74603	0.0657986	0.44226		1.74603	0.25479	0.140006		1.74603	0.155902	0.0790469		1.74603	0.0291867	0.0508955		1.74603	0.437571	0.415627		1.74603	0.176681	0.331531		1.74603	0.0393527	0.0857597		1.74603	0.20416	0.0426635		1.74603	0.378012	0
		1.85516	1	0.155064		1.85516	0.048296	0.0234988		1.85516	0.11446	0.0653689		1.85516	0.083483	0.35877		1.85516	0.190915	0.110886		1.85516	0.105901	0		1.85516	0.0378161	0.193361		1.85516	0.327365	0.456446		1.85516	0.0900733	0.275539		1.85516	0.00682499	0.0547503		1.85516	0.15496	0.0315576		1.85516	0.453324	0.00451199
		1.96429	0.824746	0.142984		1.96429	0.109498	0.00266756		1.96429	0.054193	0.159174		1.96429	0.0838931	0.117154		1.96429	0.129268	0.0751001		1.96429	0.140609	0.127067		1.96429	0.0091765	0		1.96429	0.219406	0.398217		1.96429	0.047354	0.22896		1.96429	0	0.012579		1.96429	0.0768987	0.0611335		1.96429	0.569258	0.0344103
		2.07341	0.607622	0.113579		2.07341	0.165099	0.06688		2.07341	0	0.0409426		2.07341	0.120592	0.117154		2.07341	0.0847688	0.00761608		2.07341	0.0450804	0.205487		2.07341	0.0405897	0.117133		2.07341	0.138876	0.292216		2.07341	0.0347312	0.146168		2.07341	0.112988	0.0574398		2.07341	0.0863791	0.0664034		2.07341	0.793599	0.0427388
		2.18254	0.298113	0		2.18254	0.113494	0.0973689		2.18254	0.0731574	0.111345		2.18254	0.12059	0.123686		2.18254	0.0504254	0.0178284		2.18254	0.0457125	0.3071		2.18254	0	0.0566679		2.18254	0.079453	0.167499		2.18254	0.0165135	0.197636		2.18254	0.158182	0.0709559		2.18254	0.0638042	0		2.18254	0.875081	0.0626471
		2.29167	0.202319	0.00748746		2.29167	0.159617	0		2.29167	0.0516538	0.157884		2.29167	0.133575	0.0628127		2.29167	0.0385201	0.0306308		2.29167	0.0638941	0.32533		2.29167	0.0267852	0.136715		2.29167	0.0725716	0.0842256		2.29167	0.00248966	0.0823896		2.29167	0.278939	0.0227504		2.29167	0.0367539	0.0210033		2.29167	0.807771	0.104396
		2.40079	0.108521	0.013442		2.40079	0.246054	0.148892		2.40079	0.0507082	0		2.40079	0.211502	0.0342494		2.40079	0.0167898	0		2.40079	0.106869	0.261973		2.40079	0.0115684	0.0301496		2.40079	0.0479874	0.0569885		2.40079	0	0		2.40079	0.296085	0.105226		2.40079	0.0158504	0.0794112		2.40079	0.684578	0.0998051
		2.50992	0.0697405	0.0832425		2.50992	0.376742	0.122326		2.50992	0.0713692	0.206484		2.50992	0.215553	0		2.50992	0	0.035663		2.50992	0.015454	0.236197		2.50992	0.0305735	0.0841194		2.50992	0.0731007	0.0721399		2.50992	0.0303559	0.047075		2.50992	0.34414	0.163706		2.50992	0	0.154463		2.50992	0.464637	0.184988
		2.61905	0	0.0473445		2.61905	0.433527	0.0268203		2.61905	0.0944219	0.0685655		2.61905	0.253887	0.06283		2.61905	0.160188	0.0227064		2.61905	0	0.23091		2.61905	0.10597	0.169874		2.61905	0.0421597	0		2.61905	0.106699	0.175608		2.61905	0.331443	0.139512		2.61905	0.000763255	0.210599		2.61905	0.399432	0.195352
		2.72817	0.104201	0.0108321		2.72817	0.502379	0.162177		2.72817	0.100148	0.093358		2.72817	0.186978	0.0758523		2.72817	0.256224	0.125292		2.72817	0.00996392	0.259518		2.72817	0.0718216	0.23295		2.72817	0	0.12324		2.72817	0.0866672	0.206591		2.72817	0.375489	0.0969406		2.72817	0.0411705	0.343177		2.72817	0.30034	0.238714
		2.8373	0.101385	0.0835339		2.8373	0.425833	0.290643		2.8373	0.156246	0.181099		2.8373	0.266153	0.0917813		2.8373	0.563522	0.0902027		2.8373	0.0674425	0.206205		2.8373	0.0979516	0.174373		2.8373	0.00765784	0.126955		2.8373	0.140186	0.234769		2.8373	0.537685	0.105661		2.8373	0.0778852	0.387503		2.8373	0.0797056	0.30303
		2.94643	0.183607	0.0342383		2.94643	0.466877	0.339399		2.94643	0.39198	0.14952		2.94643	0.387252	0.0289802		2.94643	0.871164	0.0568523		2.94643	0.0847894	0.247873		2.94643	0.191371	0.251881		2.94643	0.0819394	0.207826		2.94643	0.17839	0.267201		2.94643	0.547235	0.063695		2.94643	0.169127	0.384034		2.94643	0.123213	0.401063
		3.05556	0.220726	0.0671654		3.05556	0.55808	0.430195		3.05556	0.639113	0.0981933		3.05556	0.603218	0.0747001		3.05556	1	0.114099		3.05556	0.13895	0.225909		3.05556	0.255011	0.300049		3.05556	0.160493	0.137039		3.05556	0.261972	0.304588		3.05556	0.520388	0.198917		3.05556	0.184334	0.322007		3.05556	0.262791	0.497816
		3.16468	0.345999	0.249759		3.16468	0.629277	0.359664		3.16468	0.726938	0.00786282		3.16468	0.834484	0.193788		3.16468	0.869549	0.173098		3.16468	0.192992	0.139078		3.16468	0.323013	0.580994		3.16468	0.199284	0.197001		3.16468	0.327719	0.303579		3.16468	0.457777	0.31502		3.16468	0.207337	0.360501		3.16468	0.254909	0.655646
		3.27381	0.369004	0.174771		3.27381	0.756532	0.318493		3.27381	0.813195	0.323624		3.27381	1	0.255651		3.27381	0.679579	0.203266		3.27381	0.224756	0.136252		3.27381	0.342854	0.53007		3.27381	0.206112	0.210249		3.27381	0.439599	0.271241		3.27381	0.396982	0.378551		3.27381	0.186243	0.432265		3.27381	0.361679	0.738788
		3.38294	0.306024	0.202782		3.38294	0.90142	0.318337		3.38294	0.825699	0.48499		3.38294	0.97951	0.288019		3.38294	0.542651	0.260926		3.38294	0.317243	0.279734		3.38294	0.355762	0.45351		3.38294	0.30092	0.106185		3.38294	0.498708	0.231303		3.38294	0.368209	0.415385		3.38294	0.247483	0.614054		3.38294	0.419581	0.901284
		3.49206	0.370207	0.159967		3.49206	0.744967	0.340146		3.49206	0.905895	0.345343		3.49206	0.826593	0.268494		3.49206	0.428413	0.235506		3.49206	0.320152	0.339528		3.49206	0.354655	0.296418		3.49206	0.323171	0.260108		3.49206	0.558148	0.295605		3.49206	0.32599	0.422406		3.49206	0.356814	0.698267		3.49206	0.404651	1
		3.60119	0.344018	0.143921		3.60119	0.616953	0.250652		3.60119	0.940406	0.236401		3.60119	0.650657	0.255617		3.60119	0.378313	0.14045		3.60119	0.41473	0.404602		3.60119	0.433121	0.217434		3.60119	0.456638	0.188316		3.60119	0.574317	0.342752		3.60119	0.350721	0.399568		3.60119	0.505815	0.770586		3.60119	0.440189	0.986354
		3.71032	0.395927	0.208116		3.71032	0.58417	0.212115		3.71032	0.937786	0.446587		3.71032	0.565091	0.256844		3.71032	0.364517	0.102364		3.71032	0.569372	0.430848		3.71032	0.415595	0.284309		3.71032	0.566625	0.339856		3.71032	0.689691	0.275308		3.71032	0.458316	0.515663		3.71032	0.785118	0.887086		3.71032	0.496009	0.871194
		3.81944	0.474209	0.232542		3.81944	0.473824	0.162189		3.81944	1	0.47792		3.81944	0.639174	0.17684		3.81944	0.36698	0.121068		3.81944	0.596704	0.48195		3.81944	0.546353	0.264923		3.81944	0.593014	0.256327		3.81944	0.690848	0.345386		3.81944	0.551603	0.518954		3.81944	1	0.987003		3.81944	0.48675	0.746578
		3.92857	0.552439	0.191323		3.92857	0.445735	0.169121		3.92857	0.873873	0.36165		3.92857	0.597999	0.119256		3.92857	0.419485	0.138415		3.92857	0.590885	0.385422		3.92857	0.743786	0.333671		3.92857	0.546919	0.273231		3.92857	0.750885	0.30224		3.92857	0.611514	0.610535		3.92857	0.94708	1		3.92857	0.534545	0.658685
		4.0377	0.561695	0.166504		4.0377	0.612319	0.231945		4.0377	0.865502	0.295691		4.0377	0.65266	0.168873		4.0377	0.437998	0.119051		4.0377	0.641438	0.292653		4.0377	0.831614	0.458479		4.0377	0.590305	0.412417		4.0377	0.824883	0.564437		4.0377	0.858287	0.648097		4.0377	0.762311	0.932555		4.0377	0.574351	0.495171
		4.14683	0.572041	0.245458		4.14683	0.597923	0.329453		4.14683	0.751451	0.387129		4.14683	0.709964	0.130373		4.14683	0.442474	0.0244023		4.14683	0.684556	0.275677		4.14683	0.845358	0.595035		4.14683	0.565539	0.320523		4.14683	0.782419	0.472023		4.14683	1	0.591396		4.14683	0.591292	0.912887		4.14683	0.595369	0.44003
		4.25595	0.645312	0.262587		4.25595	0.532906	0.324748		4.25595	0.714373	0.427159		4.25595	0.803647	0.128046		4.25595	0.454603	0.135714		4.25595	0.716994	0.324368		4.25595	0.989962	0.648672		4.25595	0.524005	0.249854		4.25595	0.826819	0.499264		4.25595	0.926719	0.588943		4.25595	0.433399	0.814204		4.25595	0.848175	0.438944
		4.36508	0.571199	0.253699		4.36508	0.65252	0.3674		4.36508	0.704461	0.526526		4.36508	0.704873	0.154808		4.36508	0.490877	0.232589		4.36508	0.748426	0.346885		4.36508	0.966723	0.774855		4.36508	0.576268	0.286072		4.36508	0.904359	0.399796		4.36508	0.924341	0.495678		4.36508	0.329253	0.700317		4.36508	0.901198	0.595079
		4.47421	0.555744	0.295317		4.47421	0.791521	0.390974		4.47421	0.786237	0.681643		4.47421	0.665656	0.314156		4.47421	0.486364	0.214403		4.47421	0.772943	0.425646		4.47421	0.89597	0.797901		4.47421	0.658678	0.217273		4.47421	0.930315	0.293604		4.47421	0.825024	0.437381		4.47421	0.315951	0.625512		4.47421	1	0.582033
		4.58333	0.573955	0.323139		4.58333	0.761877	0.494789		4.58333	0.765404	0.752247		4.58333	0.722707	0.238616		4.58333	0.57481	0.234896		4.58333	0.904702	0.452671		4.58333	0.848685	0.731294		4.58333	0.668363	0.361671		4.58333	0.780359	0.330578		4.58333	0.673639	0.383991		4.58333	0.297148	0.536475		4.58333	0.966023	0.58624
		4.69246	0.463588	0.339026		4.69246	0.72242	0.647153		4.69246	0.807071	0.971561		4.69246	0.744945	0.302871		4.69246	0.677547	0.286007		4.69246	0.938048	0.414963		4.69246	0.933729	0.58375		4.69246	0.754046	0.299424		4.69246	0.777153	0.309013		4.69246	0.689578	0.375846		4.69246	0.290856	0.528658		4.69246	0.948983	0.571046
		4.80159	0.49024	0.341826		4.80159	0.721564	0.632982		4.80159	0.814391	0.892893		4.80159	0.716786	0.36185		4.80159	0.623535	0.305587		4.80159	0.831864	0.570084		4.80159	0.922816	0.592387		4.80159	0.78028	0.296706		4.80159	0.634172	0.273671		4.80159	0.665738	0.324239		4.80159	0.318131	0.525551		4.80159	0.8793	0.543124
		4.91071	0.529096	0.361349		4.91071	0.68715	0.603384		4.91071	0.822164	1		4.91071	0.671492	0.503972		4.91071	0.556712	0.266402		4.91071	0.786567	0.416693		4.91071	0.891603	0.538548		4.91071	0.788409	0.380256		4.91071	0.655731	0.264887		4.91071	0.576032	0.332867		4.91071	0.320893	0.589065		4.91071	0.856579	0.539527
		5.01984	0.493579	0.348572		5.01984	0.650022	0.498302		5.01984	0.729455	0.95424		5.01984	0.748841	0.428519		5.01984	0.562598	0.28893		5.01984	0.799796	0.443121		5.01984	0.96219	0.644455		5.01984	0.736597	0.333377		5.01984	0.680984	0.287906		5.01984	0.689341	0.34846		5.01984	0.353368	0.610729		5.01984	0.657569	0.516141
		5.12897	0.441501	0.432613		5.12897	0.650247	0.459388		5.12897	0.604594	0.990551		5.12897	0.655771	0.462786		5.12897	0.543776	0.350099		5.12897	0.635229	0.282256		5.12897	1	0.704298		5.12897	0.76147	0.276093		5.12897	0.735352	0.245857		5.12897	0.705029	0.392665		5.12897	0.296243	0.608265		5.12897	0.546121	0.449483
		5.2381	0.475747	0.490625		5.2381	0.707417	0.433308		5.2381	0.565519	0.891057		5.2381	0.528887	0.3362		5.2381	0.551502	0.263855		5.2381	0.660217	0.476103		5.2381	0.863326	0.888104		5.2381	0.770205	0.314024		5.2381	0.684369	0.420457		5.2381	0.698616	0.442227		5.2381	0.300466	0.619287		5.2381	0.509078	0.495113
		5.34722	0.490131	0.6306		5.34722	0.865332	0.54012		5.34722	0.552617	0.812324		5.34722	0.483874	0.402174		5.34722	0.463077	0.208847		5.34722	0.74669	0.529391		5.34722	0.849928	0.949466		5.34722	0.727095	0.422205		5.34722	0.693159	0.527029		5.34722	0.759842	0.501602		5.34722	0.283919	0.606519		5.34722	0.484974	0.49292
		5.45635	0.490278	0.873587		5.45635	1	0.547909		5.45635	0.43932	0.773272		5.45635	0.485286	0.258836		5.45635	0.554482	0.202446		5.45635	0.842233	0.622173		5.45635	0.832695	0.936359		5.45635	0.763862	0.437533		5.45635	0.793914	0.471687		5.45635	0.654414	0.533114		5.45635	0.299867	0.701609		5.45635	0.423246	0.497199
		5.56548	0.41348	1		5.56548	0.91327	0.68322		5.56548	0.450328	0.709043		5.56548	0.446982	0.324966		5.56548	0.547018	0.193491		5.56548	0.730017	0.614955		5.56548	0.874007	1		5.56548	0.870979	0.511931		5.56548	0.892242	0.541947		5.56548	0.742521	0.70514		5.56548	0.344533	0.753662		5.56548	0.478266	0.722819
		5.6746	0.432778	0.822879		5.6746	0.99494	0.769178		5.6746	0.314542	0.674514		5.6746	0.440188	0.400552		5.6746	0.552997	0.181287		5.6746	0.721255	0.728495		5.6746	0.872203	0.982459		5.6746	0.975735	0.561318		5.6746	0.925168	0.744851		5.6746	0.84718	0.879898		5.6746	0.406441	0.772985		5.6746	0.587793	0.779485
		5.78373	0.453223	0.653132		5.78373	0.933521	0.81047		5.78373	0.316589	0.729751		5.78373	0.395139	0.385058		5.78373	0.607033	0.258163		5.78373	0.777493	0.817232		5.78373	0.836299	0.94046		5.78373	0.994496	0.542582		5.78373	0.972166	0.878245		5.78373	0.858886	0.95637		5.78373	0.464148	0.81771		5.78373	0.698168	0.81764
		5.89286	0.496154	0.471729		5.89286	0.888237	0.837678		5.89286	0.246936	0.909924		5.89286	0.391823	0.399852		5.89286	0.618119	0.357549		5.89286	0.709373	0.891486		5.89286	0.764824	0.705665		5.89286	1	0.539116		5.89286	0.994972	1		5.89286	0.804578	1		5.89286	0.561346	0.892566		5.89286	0.850881	0.992353
		6.00198	0.39354	0.367189		6.00198	0.657856	0.655601		6.00198	0.273932	0.904083		6.00198	0.405039	0.424397		6.00198	0.665038	0.3366		6.00198	0.601618	1		6.00198	0.847088	0.699756		6.00198	0.950672	0.601376		6.00198	0.955657	0.958502		6.00198	0.829167	0.894812		6.00198	0.644288	0.947984		6.00198	0.713485	0.995094
						6.11111	0.661053	0.62223		6.11111	0.200174	0.813921		6.11111	0.541133	0.554382		6.11111	0.7665	0.387328		6.11111	0.753633	0.899611		6.11111	0.773132	0.50748		6.11111	0.823853	0.733971		6.11111	0.991298	0.788747		6.11111	0.851196	0.778538		6.11111	0.701956	0.949029		6.11111	0.870628	0.97449
						6.22024	0.705594	0.676606						6.22024	0.542683	0.45347		6.22024	0.696644	0.394426		6.22024	0.744619	0.984176		6.22024	0.684993	0.546642		6.22024	0.730344	0.675577		6.22024	1	0.720129		6.22024	0.880714	0.705738		6.22024	0.692612	0.890548		6.22024	0.755678	0.928178
						6.32937	0.677131	0.614801						6.32937	0.481225	0.44241		6.32937	0.649925	0.417663		6.32937	0.807197	0.854283		6.32937	0.652228	0.473062		6.32937	0.648347	0.683363		6.32937	0.899911	0.72267		6.32937	0.920665	0.722092		6.32937	0.697276	0.76062		6.32937	0.681092	0.855222
						6.43849	0.543684	0.647598						6.43849	0.395694	0.366419		6.43849	0.582558	0.532848						6.43849	0.57115	0.521686		6.43849	0.63748	0.794497		6.43849	0.854821	0.762145		6.43849	0.950824	0.674527		6.43849	0.568501	0.637605		6.43849	0.54588	0.740083
														6.54762	0.282607	0.309263		6.54762	0.543172	0.636951						6.54762	0.587293	0.548197		6.54762	0.561181	0.717651		6.54762	0.685883	0.767568		6.54762	0.964256	0.70274		6.54762	0.400535	0.612689		6.54762	0.452614	0.629534
														6.65675	0.263312	0.371972		6.65675	0.576025	0.899196										6.65675	0.588824	0.771173		6.65675	0.612582	0.766719		6.65675	0.939375	0.647399		6.65675	0.300474	0.624681		6.65675	0.263468	0.503846
																														6.76587	0.645533	0.79281		6.76587	0.545757	0.82238		6.76587	0.845497	0.58831		6.76587	0.207827	0.56052		6.76587	0.132346	0.508645
																														6.875	0.758027	0.797189		6.875	0.439069	0.72397		6.875	0.705929	0.619144		6.875	0.185525	0.625131		6.875	0.110246	0.466321
																														6.98413	0.865172	0.767057		6.98413	0.366233	0.67964		6.98413	0.656188	0.451015		6.98413	0.144475	0.643042		6.98413	0.0570971	0.427882
																														7.09325	0.900178	0.79904						7.09325	0.632107	0.420368		7.09325	0.181054	0.490785		7.09325	0.0809962	0.405904
																																						7.20238	0.620447	0.433141		7.20238	0.156132	0.566117		7.20238	0.0194494	0.402759
																																						7.31151	0.73782	0.394604		7.31151	0.17679	0.561268		7.31151	0.014181	0.383231
																																						7.42063	0.787546	0.510181
[truncated: 15 more columns]

## Sheet: exp1-endosome8
endosome 8		t1				t2				t3				t4				t5				t6				t7				t8				t9				t10				t11				t12
line profiles			Rab5	Snx1			Rab5	Snx1			Rab5	Snx1			Rab5	Snx1			Rab5	Snx1			Rab5	Snx1			Rab5	Snx1			Rab5	Snx1			Rab5	Snx1			Rab5	Snx1			Rab5	Snx1			Rab5	Snx1
		0	897.68	1055.51		0	947.555	1134.88		0	1006.68	1161.71		0	886.431	1091.23		0	909.62	1274.38		0	1042.73	1210.16		0	1008.68	1129.92		0	1150.27	1263.94		0	1274.46	1089.42		0	1038.35	1140.77		0	983.049	1062.18		0	971.226	1061.62
		0.10913	894.215	1008.92		0.10913	913.06	1077.88		0.10913	963.321	1104.37		0.10913	848.831	1054.42		0.10913	875.893	1212.05		0.10913	1008.82	1168.32		0.10913	931.603	1030.45		0.10913	1068.11	1184.16		0.10913	1199.39	1064.31		0.10913	981.659	1109.77		0.10913	968.979	1095.06		0.10913	963.724	1079.45
		0.21825	863.31	1015.76		0.21825	875.36	1031.26		0.21825	929.997	1062.56		0.21825	827.599	1007.87		0.21825	849.754	1153.27		0.21825	1011.37	1084.58		0.21825	910.031	991.224		0.21825	1120.14	1171.06		0.21825	1124.47	1068.83		0.21825	947.117	1092.53		0.21825	988.254	1085.98		0.21825	977.371	1046.03
		0.32738	858.036	974.995		0.32738	862.354	1002.98		0.32738	911.132	1084		0.32738	793.173	971.026		0.32738	829.092	1110.27		0.32738	995.511	1076.85		0.32738	941.68	964.829		0.32738	1079.92	1181.59		0.32738	1079.2	1047.23		0.32738	921.1	1073.42		0.32738	987.718	1071.4		0.32738	950.605	1069.07
		0.43651	811.745	957.25		0.43651	814.352	957.669		0.43651	911.5	1061.22		0.43651	769.284	935.513		0.43651	810.177	1082.17		0.43651	937.347	1063.69		0.43651	930.508	968.554		0.43651	1050.63	1227.68		0.43651	1014.74	1050.51		0.43651	895.976	1078.37		0.43651	992.869	1065.57		0.43651	909.213	1083.72
		0.54563	789.541	906.689		0.54563	793.971	893.032		0.54563	897.899	1017.65		0.54563	751.878	892.803		0.54563	796.305	1077.16		0.54563	905.783	1056.65		0.54563	943.929	1017.47		0.54563	1068.44	1224.11		0.54563	990.994	1097.06		0.54563	855.562	1035		0.54563	998.888	1082.23		0.54563	934.517	1071.5
		0.65476	792.658	867.876		0.65476	800.762	882.457		0.65476	892.476	1008.31		0.65476	735.29	831.488		0.65476	787.595	1068.26		0.65476	922.469	1058.72		0.65476	940.264	1082.2		0.65476	1053.34	1222.34		0.65476	977.678	1111.7		0.65476	846.077	1011.36		0.65476	981.891	1071.35		0.65476	948.476	1091.33
		0.76389	790.694	858.06		0.76389	796.015	874.629		0.76389	900.024	988.666		0.76389	741.621	827.418		0.76389	788.318	1052.91		0.76389	868.498	1035.41		0.76389	972.126	1130.13		0.76389	1035.9	1247.73		0.76389	951.258	1095.12		0.76389	847.761	1006.47		0.76389	967.984	1033.13		0.76389	976.932	1076.67
		0.87302	788.018	867.895		0.87302	817.093	876.023		0.87302	878.446	980.596		0.87302	746.006	818.844		0.87302	782.011	1061.12		0.87302	850.787	1003.49		0.87302	1033.12	1141.12		0.87302	1024.01	1228.41		0.87302	921.469	1062.26		0.87302	831.073	1006.22		0.87302	965.035	1029.57		0.87302	1006.96	1094.5
		0.98214	784.792	903.975		0.98214	819.415	932.599		0.98214	888.589	968.447		0.98214	746.137	821.046		0.98214	761.205	1037.33		0.98214	841.507	990.483		0.98214	1091.1	1117.09		0.98214	1015.49	1185.98		0.98214	940.504	1046.66		0.98214	842.901	1010.3		0.98214	969.873	1035.47		0.98214	1006.29	1109.55
		1.09127	836.866	911.743		1.09127	845.319	969.001		1.09127	905.889	974.066		1.09127	766.605	840.993		1.09127	788.326	1020.64		1.09127	808.919	977.665		1.09127	1134.03	1221.52		1.09127	1034.73	1241.87		1.09127	934.162	1100.21		1.09127	839.538	1049.86		1.09127	981.369	1051.73		1.09127	1011.25	1155.01
		1.2004	887.536	948.687		1.2004	889.283	1072.27		1.2004	915.476	999.486		1.2004	776.22	882.379		1.2004	802.524	1011.43		1.2004	834.693	978.033		1.2004	1131.88	1307.83		1.2004	1022.81	1310.08		1.2004	922.288	1119.1		1.2004	817.179	1094.33		1.2004	1024.19	1055.95		1.2004	1065.15	1189.97
		1.30952	986.659	1051.98		1.30952	950.578	1162.51		1.30952	919.426	1004.54		1.30952	831.811	912.422		1.30952	825.68	1009.16		1.30952	859.547	1036.71		1.30952	1117.44	1384.4		1.30952	1061.47	1299.86		1.30952	932.084	1156.4		1.30952	877.669	1146.37		1.30952	1026.81	1067.04		1.30952	1103.13	1245.64
		1.41865	1106.88	1249.73		1.41865	1027.26	1270.29		1.41865	926.846	1015.89		1.41865	861.806	976.474		1.41865	872.137	1010.01		1.41865	882.463	1056.81		1.41865	1096.78	1389.93		1.41865	1075.32	1371.68		1.41865	985.784	1166.45		1.41865	917.739	1196.34		1.41865	1039.76	1092.82		1.41865	1179.3	1290.01
		1.52778	1144.31	1446.46		1.52778	1078.89	1345.66		1.52778	938.837	1047.91		1.52778	895.134	1031.38		1.52778	920.289	1047.5		1.52778	886.307	1109.5		1.52778	1034.87	1349.3		1.52778	1147.22	1425.49		1.52778	1015.7	1165.08		1.52778	995.418	1242.3		1.52778	1068.02	1111.39		1.52778	1189.98	1379.95
		1.6369	1141.56	1565.04		1.6369	1125.41	1368.01		1.6369	1002.88	1081.91		1.6369	944.933	1070.07		1.6369	944.777	1115.74		1.6369	876.77	1145.59		1.6369	1075.46	1300.54		1.6369	1167.77	1445.57		1.6369	1088.99	1173.84		1.6369	1078.56	1293.58		1.6369	1149.38	1168.75		1.6369	1325.36	1417.97
		1.74603	1186.6	1639.82		1.74603	1174.07	1366.89		1.74603	1055.03	1147.53		1.74603	1037.81	1135.98		1.74603	950.253	1196.71		1.74603	922.141	1187.27		1.74603	1092.59	1208.14		1.74603	1266.06	1558.15		1.74603	1162.31	1209.13		1.74603	1152.13	1381.76		1.74603	1215.34	1239.59		1.74603	1413.47	1506.4
		1.85516	1181.64	1609.4		1.85516	1203.13	1351.34		1.85516	1067.16	1218.79		1.85516	1113.78	1224.67		1.85516	964.133	1178.92		1.85516	960.984	1204.62		1.85516	1120.65	1205.71		1.85516	1367.8	1631.48		1.85516	1209.03	1278.34		1.85516	1203.37	1481.17		1.85516	1255.92	1314.79		1.85516	1439.79	1506.48
		1.96429	1207.9	1566.56		1.96429	1172.94	1312.48		1.96429	1119.62	1368.36		1.96429	1117.81	1324.88		1.96429	1015.92	1238.39		1.96429	948.279	1189.26		1.96429	1150.3	1229.04		1.96429	1482.26	1738.41		1.96429	1239.88	1361.78		1.96429	1261.36	1506.12		1.96429	1279.68	1316.45		1.96429	1457.51	1452.84
		2.07341	1229.13	1501.02		2.07341	1149.04	1274.71		2.07341	1188.62	1494.71		2.07341	1121.56	1414.84		2.07341	1001.7	1204.06		2.07341	960.989	1242.78		2.07341	1186.75	1232.67		2.07341	1533.62	1775.46		2.07341	1280.25	1443.53		2.07341	1284.34	1454.77		2.07341	1283.37	1373.43		2.07341	1383.56	1421.04
		2.18254	1199.19	1410.84		2.18254	1071.53	1217.03		2.18254	1302.13	1649.3		2.18254	1123.65	1458.26		2.18254	1015.97	1203.71		2.18254	968.005	1226.54		2.18254	1211.68	1228.24		2.18254	1535.08	1724.62		2.18254	1299.34	1470.58		2.18254	1295.79	1430.58		2.18254	1258.69	1326.72		2.18254	1240.11	1367.61
		2.29167	1128.75	1348.29		2.29167	1051.62	1150.22		2.29167	1415.19	1734.83		2.29167	1129.36	1450.01		2.29167	1032.57	1166.33		2.29167	1014.21	1270.98		2.29167	1231.21	1204.31		2.29167	1592.11	1724.7		2.29167	1308.44	1438.14		2.29167	1336.36	1433.33		2.29167	1280.01	1334.94		2.29167	1178.03	1257
		2.40079	1060.06	1206.74		2.40079	1033.66	1126.66		2.40079	1495.97	1707.83		2.40079	1168.56	1403.36		2.40079	1032.35	1169.48		2.40079	1022.97	1298.26		2.40079	1231.12	1242.46		2.40079	1549.01	1603.76		2.40079	1241.15	1396.32		2.40079	1358.27	1408.99		2.40079	1304.07	1352.12		2.40079	1153.78	1196.92
		2.50992	1021.48	1136.77		2.50992	1014.6	1082.37		2.50992	1505.24	1657.87		2.50992	1194.54	1378.44		2.50992	1012.79	1185.5		2.50992	1038.45	1319.26		2.50992	1237.89	1333.24		2.50992	1444.69	1456.76		2.50992	1252.58	1334.13		2.50992	1396.87	1396.47		2.50992	1320.87	1359.2		2.50992	1074.15	1162.48
		2.61905	1032.93	1080.99		2.61905	1025.21	1040.65		2.61905	1472.73	1519.51		2.61905	1183.17	1351.27		2.61905	1023.67	1150		2.61905	1060.39	1294.43		2.61905	1269.63	1409.53		2.61905	1282.77	1297.56		2.61905	1251.18	1286.87		2.61905	1364.61	1418.14		2.61905	1324.79	1384.85		2.61905	1029.63	1172.44
		2.72817	1019.86	1071.39		2.72817	1074.86	1047.68		2.72817	1393.86	1458.48		2.72817	1120.31	1325.47		2.72817	1004.42	1117.66		2.72817	1109.48	1349.59		2.72817	1263.23	1484.81		2.72817	1125.73	1178.55		2.72817	1239.55	1256.38		2.72817	1234.52	1376.05		2.72817	1399.49	1413.64		2.72817	965.412	1160.21
		2.8373	1021.96	1085.16		2.8373	1114.39	1078.21		2.8373	1350.78	1362.5		2.8373	1020.43	1248.16		2.8373	1018.37	1086.61		2.8373	1159.5	1413.13		2.8373	1227.56	1434.36		2.8373	968.568	1056.25		2.8373	1170.01	1191.99		2.8373	1080.91	1287.33		2.8373	1426.46	1492.48		2.8373	918.518	1140.07
		2.94643	1027.98	1126.66		2.94643	1160.82	1091.68		2.94643	1234.07	1260.21		2.94643	957.607	1187.54		2.94643	1043.81	1061.86		2.94643	1202.79	1462.7		2.94643	1180.93	1368.66		2.94643	901.513	1001.56		2.94643	1055.58	1091.2		2.94643	968.765	1137.3		2.94643	1434.21	1510.68		2.94643	857.483	1105.42
		3.05556	1041.92	1142.54		3.05556	1241.03	1134.41		3.05556	1253.73	1259.21		3.05556	952.079	1145.71		3.05556	1030.54	1052.89		3.05556	1214.51	1436.43		3.05556	1159.97	1261.45		3.05556	868.868	913.674		3.05556	946.839	1004.65		3.05556	892.861	1021.6		3.05556	1353.14	1466.09		3.05556	822.109	1017.85
		3.16468	1063.69	1091.79		3.16468	1285.76	1183.9		3.16468	1268.56	1273.17		3.16468	955.328	1138.74		3.16468	1011.47	1014.67		3.16468	1169.96	1379.07		3.16468	1143.18	1167.92		3.16468	816.748	860.534		3.16468	877.643	935.014		3.16468	835.752	900.867		3.16468	1245.78	1419.67		3.16468	782.235	939.047
		3.27381	1056.32	1091.17		3.27381	1285.87	1202.66		3.27381	1256.32	1272.45		3.27381	928.929	1122.37		3.27381	1008.04	1020.05		3.27381	1052.25	1301.47		3.27381	1113.3	1077.53		3.27381	763.936	825.331		3.27381	840.909	892.933		3.27381	769.56	902.691		3.27381	1117.31	1360.35		3.27381	731.837	880.644
		3.38294	1044.84	1120.69		3.38294	1225.27	1194.17		3.38294	1217.93	1296.11		3.38294	960.615	1145.73		3.38294	999.378	1053.85		3.38294	971.981	1215.11		3.38294	1132.11	1074.41		3.38294	747.975	806.095		3.38294	794.352	845.436		3.38294	734.49	846.944		3.38294	966.906	1261.77		3.38294	712.938	873.664
		3.49206	1030.73	1097.73		3.49206	1165.43	1166.24		3.49206	1192.04	1346.26		3.49206	979.257	1128.29		3.49206	970.228	1050.66		3.49206	939.758	1154.78		3.49206	1020.15	1049.23		3.49206	738.146	791.712		3.49206	761.361	816.808		3.49206	696.982	792.384		3.49206	906.067	1146.91		3.49206	690.921	854.621
		3.60119	973.907	1090.87		3.60119	1114.31	1143.31		3.60119	1147.06	1362.35		3.60119	1021.58	1104.61		3.60119	961.262	1045.16		3.60119	907.864	1074.99		3.60119	972.2	1048.86		3.60119	768.614	812.688		3.60119	732.938	811.045		3.60119	670.952	793.041		3.60119	846.239	1062.46		3.60119	672.171	821.517
		3.71032	962.759	1099.09		3.71032	1063.57	1123.93		3.71032	1105.22	1338.17		3.71032	1086.81	1059.41		3.71032	979.991	1080.11		3.71032	889.202	1043.89		3.71032	919.337	1013.36		3.71032	750.008	819.413		3.71032	722.037	834.806		3.71032	706.803	773.655		3.71032	823.896	989.77		3.71032	696.423	792.626
		3.81944	979.078	1065.72		3.81944	1046.76	1112.03		3.81944	1081.4	1291.35		3.81944	1073.46	1067.22		3.81944	972.661	1062.13		3.81944	856.678	1025.5		3.81944	927.694	1041.2		3.81944	757.386	807.333		3.81944	724.33	822.37		3.81944	728.392	790.447		3.81944	796.143	926.639		3.81944	697.453	737.828
		3.92857	978.342	1106.09		3.92857	1080.95	1092.33		3.92857	1066.58	1226.42		3.92857	1033.24	1058.69		3.92857	909.808	1044.04		3.92857	849.343	1021.43		3.92857	972.501	1085.23		3.92857	796.653	832.806		3.92857	740.862	827.003		3.92857	707.622	774.438		3.92857	792.741	902.943		3.92857	720.006	743.35
		4.0377	998.941	1097.12		4.0377	1129.15	1106.69		4.0377	1026.27	1182.58		4.0377	1005.25	1095.95		4.0377	886.26	1012.88		4.0377	865.313	1082.94		4.0377	1028.81	1108.76		4.0377	826.878	810.092		4.0377	796.225	852.976		4.0377	736.463	777.58		4.0377	816.389	904.365		4.0377	745.983	782.338
		4.14683	982.582	1117.52		4.14683	1135.38	1162.94		4.14683	1068.06	1217.76		4.14683	1055.6	1091.7		4.14683	884.297	935.359		4.14683	936.909	1174.05		4.14683	1004.47	1101.97		4.14683	848.415	860.203		4.14683	869.973	869.679		4.14683	716.009	779.364		4.14683	801.156	919.239		4.14683	781.68	804.607
		4.25595	969.629	1138.97		4.25595	1097.69	1157.53		4.25595	1050.59	1215.69		4.25595	1090.92	1136.91		4.25595	881.677	961.204		4.25595	940.735	1182.47		4.25595	1005.26	1113.65		4.25595	859.784	864.869		4.25595	901.819	893.132		4.25595	722.356	813.047		4.25595	824.938	924.353		4.25595	761.2	854.871
		4.36508	1016.32	1125.15		4.36508	1097.57	1147.8		4.36508	1068.9	1206.69		4.36508	1099.34	1125.11		4.36508	906.41	1023.81		4.36508	943.581	1198.15		4.36508	1023.68	1118.01		4.36508	889.694	896.072		4.36508	918.908	934.634		4.36508	769.857	826.395		4.36508	850.112	932.182		4.36508	778.497	887.411
		4.47421	990.375	1094.4		4.47421	1064.73	1128.53		4.47421	1091.38	1182.41		4.47421	1119.46	1105.99		4.47421	936.717	1045.34		4.47421	961.944	1211.66		4.47421	1055.97	1092.04		4.47421	939.153	956.441		4.47421	930.266	946.645		4.47421	788.629	826.7		4.47421	906.924	949.893		4.47421	811.526	919.927
		4.58333	979.908	1047.99		4.58333	1009.73	1116.8		4.58333	1041.41	1201.45		4.58333	1134.38	1097.27		4.58333	975.892	1062.16		4.58333	986.263	1245.44		4.58333	1009.11	1057.23		4.58333	944.976	1003.73		4.58333	939.682	947.18		4.58333	806.273	832.353		4.58333	921.323	999.296		4.58333	833.878	910.137
		4.69246	1001.57	1054.22		4.69246	1028.88	1147.3		4.69246	1078.32	1215.21		4.69246	1121.72	1093.69		4.69246	1000.39	1073.66		4.69246	1029.18	1223.64		4.69246	917.01	1029.31		4.69246	980.34	1055.63		4.69246	934.318	992.036		4.69246	793.077	862.441		4.69246	930.432	971.019		4.69246	884.947	913.555
		4.80159	981.94	1065.68		4.80159	1020.79	1178.94		4.80159	1083.33	1217.03		4.80159	1098.89	1120.91		4.80159	994.963	990.995		4.80159	1059.81	1224.59		4.80159	874.09	1008.95		4.80159	1036.47	1145.92		4.80159	937.307	1034.57		4.80159	814.098	900.921		4.80159	946.877	1005.03		4.80159	876.279	873.228
		4.91071	1006.16	1055.34		4.91071	1005.31	1201.36		4.91071	1088.04	1210.93		4.91071	1035.38	1163.05		4.91071	957.907	1031.79		4.91071	1134.27	1249.38		4.91071	876.768	993.205		4.91071	1057.76	1170.95		4.91071	939.529	1073.3		4.91071	871.475	928.099		4.91071	949.039	1051.4		4.91071	871.465	861.934
		5.01984	1050.88	1042.03		5.01984	1025.25	1184.14		5.01984	1084.52	1246.18		5.01984	1017.65	1179.94		5.01984	954.8	1076.5		5.01984	1135.1	1230.75		5.01984	901.049	996.502		5.01984	1060.61	1186.76		5.01984	956.374	1074.72		5.01984	921.549	971.87		5.01984	942.815	1053.64		5.01984	833.461	867.806
		5.12897	1032.57	1029.16		5.12897	974.323	1169.93		5.12897	1078.58	1303.86		5.12897	1024.96	1157.59		5.12897	958.614	1040.3		5.12897	1145.14	1273.17		5.12897	909.773	997.22		5.12897	1060.16	1212.95		5.12897	962.707	1010.58		5.12897	977.87	1013.97		5.12897	992.806	1093.8		5.12897	844.349	886.643
		5.2381	1023.54	1036.69		5.2381	985.111	1154.54		5.2381	1109.66	1404.64		5.2381	1006.23	1181.68		5.2381	975.452	1072.36		5.2381	1186.66	1320.17		5.2381	958.86	1013.71		5.2381	1073.34	1268.34		5.2381	961.632	995.845		5.2381	1013.49	1103.48		5.2381	958.922	1096.64		5.2381	863.5	945.1
		5.34722	976.188	1038.19		5.34722	954.894	1141.54		5.34722	1064.91	1496.15		5.34722	986.533	1173.38		5.34722	970.688	1075.06		5.34722	1186.45	1302.54		5.34722	1005.82	1047.72		5.34722	1113.67	1237.57		5.34722	979.259	984.53		5.34722	1069.98	1112.21		5.34722	1000.27	1125.88		5.34722	891.885	981.911
										5.45635	1061.43	1457.17		5.45635	989.743	1192.82		5.45635	952.655	1088.86		5.45635	1101.22	1287.24		5.45635	1081.64	1109.1		5.45635	1110.78	1232.28		5.45635	1007.32	981.095		5.45635	1097.23	1195.19		5.45635	1005.48	1158.34		5.45635	899.231	1015.54
										5.56548	1039.45	1426.44		5.56548	984.374	1206.22		5.56548	960.955	1069.3		5.56548	1055.8	1305.3		5.56548	1099.63	1152.88		5.56548	1088.99	1177.21		5.56548	1012.89	1015.59		5.56548	1095.47	1222		5.56548	1011.32	1212.46		5.56548	890.425	1068.6
										5.6746	1055.69	1369.62		5.6746	951.262	1230.2		5.6746	917.916	1057.76		5.6746	1021.17	1391.82		5.6746	1068.31	1143.69		5.6746	1097.98	1160.83		5.6746	1060.71	1047.85		5.6746	1082.87	1201.52		5.6746	1053.91	1163.15		5.6746	926.38	1153.14
										5.78373	1053.2	1321.04		5.78373	916.012	1243.35		5.78373	934.438	1097.92		5.78373	991.374	1436.43		5.78373	1046.53	1145.25		5.78373	1069.58	1152.42		5.78373	1098.44	1097.95		5.78373	1083.32	1202.83		5.78373	1066.49	1128.69		5.78373	954.809	1136.6
										5.89286	1019.82	1190.46		5.89286	926.984	1225.06		5.89286	924.015	1105.46		5.89286	1004.19	1427.79		5.89286	1051.99	1137.6		5.89286	1044.77	1141.33		5.89286	1111.51	1155.61		5.89286	1050.79	1205.67		5.89286	1025.11	1060.33		5.89286	942.229	1121.56
														6.00198	928.365	1184.49		6.00198	929.451	1122.58		6.00198	981.374	1338.46		6.00198	1026.29	1176.74		6.00198	1029.7	1196.9		6.00198	1057.87	1119.74		6.00198	1070.43	1203.2		6.00198	986.573	1059.87		6.00198	943.515	1094.87
														6.11111	898.382	1145.26		6.11111	938.141	1138.33		6.11111	1008.46	1245.22		6.11111	1056.67	1243.05		6.11111	1059.46	1263.18		6.11111	1046.48	1107.8		6.11111	1063.48	1193.42		6.11111	972.927	1086.71		6.11111	914.775	1063.88
																		6.22024	926.436	1161.55		6.22024	1012.74	1231.67		6.22024	1015.39	1280.77		6.22024	1041.07	1302.43		6.22024	990.822	1073.8		6.22024	1065.23	1188.94		6.22024	962.499	1087.61		6.22024	954.326	1037.46
																		6.32937	934.551	1191.18		6.32937	1033.36	1261.1		6.32937	1031.13	1262.75		6.32937	1040.07	1319.95		6.32937	991.52	1048.06		6.32937	1109.06	1175.27		6.32937	945.645	1133.19		6.32937	944.453	1041.6
																		6.43849	948.386	1235.87		6.43849	1066.39	1269.82		6.43849	1056.06	1214.07		6.43849	1078.52	1325.21		6.43849	1035.01	1060.92		6.43849	1128.35	1195.49		6.43849	960.353	1092.73		6.43849	969.557	1024.95
																		6.54762	915.801	1236.79						6.54762	1033.95	1158.02		6.54762	1113.34	1273.87		6.54762	1071.43	1067.95		6.54762	1097.6	1188.23		6.54762	980.808	1101.94		6.54762	972.2	1053.28
																										6.65675	1000.46	1147.32						6.65675	1103.42	1143.73						6.65675	966.665	1088.84
																										6.76587	1011.06	1186.52						6.76587	1155.9	1147.6
																																		6.875	1226.17	1119.43
																																		6.98413	1232.18	1090.21
		t1				t2				t3				t4				t5				t6				t7				t8				t9				t10				t11				t12
			Rab5	Snx1			Rab5	Snx1			Rab5	Snx1			Rab5	Snx1			Rab5	Snx1			Rab5	Snx1			Rab5	Snx1			Rab5	Snx1			Rab5	Snx1			Rab5	Snx1			Rab5	Snx1			Rab5	Snx1
		0	0.254058	0.252577		0	0.312229	0.527487		0	0.204581	0.25218		0	0.329106	0.425995		0	0.525164	1		0	0.576475	0.479342		0	0.340258	0.317494		0	0.482595	0.480032		0	0.94205	0.422079		0	0.506107	0.501208		0	0.296675	0.262015		0	0.380797	0.421255
		0.10913	0.24626	0.192982		0.10913	0.242102	0.411952		0.10913	0.135412	0.177353		0.10913	0.247233	0.36842		0.10913	0.405822	0.816168		0.10913	0.492867	0.393082		0.10913	0.145402	0.126197		0.10913	0.386391	0.398936		0.10913	0.814044	0.384004		0.10913	0.428019	0.458878		0.10913	0.274741	0.31612		0.10913	0.371244	0.444442
		0.21825	0.176707	0.201732		0.21825	0.16546	0.317469		0.21825	0.0822457	0.1228		0.21825	0.201001	0.295624		0.21825	0.313329	0.64276		0.21825	0.499152	0.220432		0.21825	0.0908647	0.0507614		0.21825	0.447323	0.385621		0.21825	0.686278	0.390859		0.21825	0.380435	0.435353		0.21825	0.304789	0.301176		0.21825	0.388621	0.400962
		0.32738	0.164838	0.14958		0.32738	0.13902	0.260139		0.32738	0.052148	0.150777		0.32738	0.126039	0.238002		0.32738	0.240217	0.515928		0.32738	0.460046	0.204481		0.32738	0.170879	0		0.32738	0.400226	0.396317		0.32738	0.609072	0.35811		0.32738	0.344595	0.409256		0.32738	0.303953	0.277179		0.32738	0.354539	0.430935
		0.43651	0.0606585	0.126881		0.43651	0.0414336	0.168307		0.43651	0.0527351	0.121057		0.43651	0.0740212	0.182462		0.43651	0.173287	0.433039		0.43651	0.316642	0.177367		0.43651	0.142634	0.00716371		0.43651	0.365917	0.44317		0.43651	0.499142	0.36308		0.43651	0.309985	0.416016		0.43651	0.311983	0.267585		0.43651	0.301834	0.449996
		0.54563	0.0106878	0.0622049		0.54563	0	0.0372996		0.54563	0.0310358	0.0642001		0.54563	0.03612	0.115667		0.54563	0.124201	0.418266		0.54563	0.23882	0.162855		0.54563	0.176564	0.10123		0.54563	0.386781	0.439546		0.54563	0.458656	0.433662		0.54563	0.254312	0.356803		0.54563	0.321367	0.295009		0.54563	0.334054	0.434101
		0.65476	0.0177027	0.0125564		0.65476	0.0138058	0.015866		0.65476	0.0223838	0.0520156		0.65476	0	0.0197744		0.65476	0.0933806	0.392014		0.65476	0.27996	0.167108		0.65476	0.167299	0.225731		0.65476	0.369098	0.437745		0.65476	0.435948	0.455862		0.65476	0.241246	0.324531		0.65476	0.29487	0.2771		0.65476	0.351829	0.459899
		0.76389	0.0132826	0		0.76389	0.00415536	0		0.76389	0.034426	0.0263823		0.76389	0.0137856	0.0134092		0.76389	0.0959389	0.346751		0.76389	0.146893	0.119054		0.76389	0.247851	0.317901		0.76389	0.348679	0.463555		0.76389	0.390894	0.430725		0.76389	0.243566	0.317855		0.76389	0.27319	0.214215		0.76389	0.388062	0.440832
		0.87302	0.00726021	0.0125807		0.87302	0.047006	0.00282539		0.87302	0	0.0158523		0.87302	0.0233338	0		0.87302	0.0736217	0.370953		0.87302	0.103226	0.0532375		0.87302	0.402054	0.339043		0.87302	0.334744	0.443912		0.87302	0.340094	0.380896		0.87302	0.220577	0.317518		0.87302	0.268592	0.208352		0.87302	0.426293	0.46403
		0.98214	0	0.0587332		0.98214	0.0517265	0.117495		0.98214	0.0161824	0		0.98214	0.0236191	0.00344378		0.98214	0	0.300779		0.98214	0.0803464	0.026427		0.98214	0.548627	0.292827		0.98214	0.324775	0.400787		0.98214	0.372555	0.357249		0.98214	0.236871	0.32308		0.98214	0.276135	0.218064		0.98214	0.425451	0.483602
		1.09127	0.117194	0.0686699		1.09127	0.104388	0.191275		1.09127	0.0437832	0.00733182		1.09127	0.0681877	0.0346395		1.09127	0.0959672	0.251566		1.09127	0	0		1.09127	0.657158	0.493648		1.09127	0.347303	0.457592		1.09127	0.36174	0.438444		1.09127	0.232238	0.377087		1.09127	0.294056	0.244828		1.09127	0.431754	0.542752
		1.2004	0.231228	0.115928		1.2004	0.193765	0.400591		1.2004	0.0590785	0.0405005		1.2004	0.0891242	0.0993644		1.2004	0.146207	0.224388		1.2004	0.0635463	0.00075871		1.2004	0.651748	0.659648		1.2004	0.33334	0.526931		1.2004	0.341491	0.467073		1.2004	0.201437	0.437808		1.2004	0.360817	0.251772		1.2004	0.500395	0.588232
		1.30952	0.454308	0.248057		1.30952	0.318375	0.58349		1.30952	0.0653804	0.0470912		1.30952	0.210172	0.14635		1.30952	0.228144	0.217683		1.30952	0.124824	0.121742		1.30952	0.615224	0.806889		1.30952	0.378614	0.516545		1.30952	0.358196	0.523628		1.30952	0.284766	0.50885		1.30952	0.364892	0.270018		1.30952	0.548757	0.660662
		1.41865	0.724877	0.501015		1.41865	0.47427	0.801927		1.41865	0.0772185	0.0618997		1.41865	0.275486	0.246523		1.41865	0.392531	0.220211		1.41865	0.181324	0.163176		1.41865	0.562997	0.81754		1.41865	0.394836	0.589548		1.41865	0.449772	0.538878		1.41865	0.339965	0.577073		1.41865	0.385083	0.312438		1.41865	0.645743	0.718383
		1.52778	0.809115	0.752669		1.52778	0.579227	0.954701		1.52778	0.0963492	0.103687		1.52778	0.348057	0.332389		1.52778	0.562916	0.330784		1.52778	0.190802	0.271812		1.52778	0.406486	0.739397		1.52778	0.479031	0.644256		1.52778	0.500793	0.536796		1.52778	0.446973	0.639817		1.52778	0.429133	0.342995		1.52778	0.659346	0.835388
		1.6369	0.802905	0.904345		1.6369	0.673792	1		1.6369	0.198526	0.148051		1.6369	0.456493	0.392896		1.6369	0.649566	0.532063		1.6369	0.167288	0.346207		1.6369	0.509094	0.64562		1.6369	0.503093	0.664662		1.6369	0.625775	0.550077		1.6369	0.561506	0.709835		1.6369	0.555967	0.437366		1.6369	0.831723	0.884849
		1.74603	0.904285	1		1.74603	0.77273	0.997726		1.74603	0.281728	0.233676		1.74603	0.65872	0.495981		1.74603	0.668943	0.770925		1.74603	0.279151	0.432135		1.74603	0.552394	0.467926		1.74603	0.618195	0.779099		1.74603	0.750796	0.603587		1.74603	0.662856	0.830221		1.74603	0.658799	0.553924		1.74603	0.943922	0.999895
		1.85516	0.893118	0.961094		1.85516	0.831795	0.966201		1.85516	0.301087	0.32665		1.85516	0.824162	0.634692		1.85516	0.718057	0.718423		1.85516	0.374919	0.46792		1.85516	0.623357	0.463245		1.85516	0.737336	0.853647		1.85516	0.830473	0.708525		1.85516	0.733436	0.96595		1.85516	0.72206	0.677668		1.85516	0.977435	1
		1.96429	0.952217	0.906288		1.96429	0.770423	0.887451		1.96429	0.384783	0.52182		1.96429	0.832929	0.791404		1.96429	0.901315	0.893843		1.96429	0.343595	0.43624		1.96429	0.698291	0.50812		1.96429	0.871359	0.962339		1.96429	0.88308	0.835029		1.96429	0.813326	1		1.96429	0.759097	0.680398		1.96429	1	0.930224
		2.07341	1	0.822452		2.07341	0.721829	0.810903		2.07341	0.494862	0.686688		2.07341	0.84109	0.9321		2.07341	0.850991	0.792585		2.07341	0.374932	0.546584		2.07341	0.790448	0.515093		2.07341	0.931512	1		2.07341	0.951931	0.958979		2.07341	0.844974	0.929895		2.07341	0.764851	0.774155		2.07341	0.905838	0.888848
		2.18254	0.932617	0.707101		2.18254	0.564267	0.693976		2.18254	0.675957	0.888392		2.18254	0.845645	1		2.18254	0.901471	0.791567		2.18254	0.39223	0.5131		2.18254	0.853495	0.506571		2.18254	0.933213	0.948328		2.18254	0.984477	1		2.18254	0.860749	0.896878		2.18254	0.726377	0.697297		2.18254	0.723178	0.819331
		2.29167	0.77409	0.627088		2.29167	0.523793	0.558584		2.29167	0.856337	1		2.29167	0.858083	0.987102		2.29167	0.96021	0.681298		2.29167	0.506154	0.604723		2.29167	0.902855	0.460564		2.29167	1	0.948405		2.29167	1	0.950809		2.29167	0.916642	0.900625		2.29167	0.759619	0.710829		2.29167	0.64413	0.675432
		2.40079	0.61949	0.446021		2.40079	0.487277	0.510828		2.40079	0.98522	0.964766		2.40079	0.94344	0.914137		2.40079	0.959456	0.69059		2.40079	0.527752	0.660974		2.40079	0.902623	0.533928		2.40079	0.949528	0.825464		2.40079	0.885254	0.887398		2.40079	0.946818	0.867399		2.40079	0.797121	0.739089		2.40079	0.61325	0.597269
		2.50992	0.532664	0.356518		2.50992	0.448535	0.42106		2.50992	1	0.899575		2.50992	1	0.875164		2.50992	0.890236	0.737844		2.50992	0.565916	0.704278		2.50992	0.919741	0.708501		2.50992	0.827373	0.676041		2.50992	0.904738	0.793115		2.50992	1	0.850303		2.50992	0.823315	0.750752		2.50992	0.511848	0.552465
		2.61905	0.558439	0.285162		2.61905	0.470094	0.336503		2.61905	0.948139	0.719043		2.61905	0.975244	0.832681		2.61905	0.928717	0.633141		2.61905	0.619999	0.653082		2.61905	1	0.85523		2.61905	0.637759	0.514205		2.61905	0.90236	0.721458		2.61905	0.955552	0.879895		2.61905	0.829415	0.792944		2.61905	0.455168	0.565428
		2.72817	0.529025	0.272891		2.72817	0.571041	0.350746		2.72817	0.82231	0.639415		2.72817	0.838361	0.792329		2.72817	0.860609	0.537745		2.72817	0.741037	0.766796		2.72817	0.9838	1		2.72817	0.453868	0.393225		2.72817	0.882516	0.675224		2.72817	0.776346	0.822429		2.72817	0.945881	0.840322		2.72817	0.373394	0.549507
		2.8373	0.533753	0.290501		2.8373	0.651403	0.412623		2.8373	0.753571	0.514176		2.8373	0.620888	0.671418		2.8373	0.90997	0.446141		2.8373	0.864364	0.897803		2.8373	0.893625	0.902983		2.8373	0.269826	0.268908		2.8373	0.763933	0.577596		2.8373	0.56475	0.7013		2.8373	0.987925	0.970045		2.8373	0.313682	0.523305
		2.94643	0.547295	0.343591		2.94643	0.745789	0.439928		2.94643	0.567364	0.3807		2.94643	0.48409	0.576622		2.94643	1	0.373142		2.94643	0.971104	1		2.94643	0.775749	0.776619		2.94643	0.191304	0.21332		2.94643	0.568787	0.42477		2.94643	0.410257	0.496467		2.94643	1	1		2.94643	0.235964	0.478229
		3.05556	0.578676	0.363902		3.05556	0.908857	0.52653		3.05556	0.598737	0.379392		3.05556	0.472053	0.511198		3.05556	0.953048	0.34668		3.05556	1	0.945835		3.05556	0.722749	0.570451		3.05556	0.153077	0.123977		3.05556	0.383358	0.293542		3.05556	0.305694	0.338509		3.05556	0.873625	0.92662		3.05556	0.190921	0.364304
		3.16468	0.627659	0.298985		3.16468	0.999791	0.626842		3.16468	0.622403	0.397607		3.16468	0.479128	0.500297		3.16468	0.885544	0.233942		3.16468	0.890166	0.827575		3.16468	0.680293	0.390571		3.16468	0.0920437	0.0699593		3.16468	0.265357	0.187964		3.16468	0.227023	0.173678		3.16468	0.706253	0.850244		3.16468	0.140148	0.261783
		3.27381	0.61107	0.298184		3.27381	1	0.664871		3.27381	0.602866	0.396669		3.27381	0.421645	0.474699		3.27381	0.873418	0.249823		3.27381	0.599942	0.667596		3.27381	0.60476	0.21674		3.27381	0.0302003	0.0341745		3.27381	0.202714	0.12416		3.27381	0.135839	0.176168		3.27381	0.505969	0.752643		3.27381	0.0759747	0.185801
		3.38294	0.585241	0.335951		3.38294	0.876803	0.647645		3.38294	0.541622	0.427549		3.38294	0.49064	0.511227		3.38294	0.842771	0.349526		3.38294	0.402033	0.489535		3.38294	0.652309	0.210732		3.38294	0.0115099	0.0146207		3.38294	0.12332	0.0521443		3.38294	0.0875277	0.100059		3.38294	0.271509	0.59043		3.38294	0.05191	0.17672
		3.49206	0.553484	0.306577		3.49206	0.755165	0.591042		3.49206	0.50031	0.492981		3.49206	0.531233	0.483946		3.49206	0.739624	0.340105		3.49206	0.322586	0.365168		3.49206	0.369261	0.162317		3.49206	0	0		3.49206	0.0670598	0.00873797		3.49206	0.035858	0.02557		3.49206	0.176666	0.401441		3.49206	0.023875	0.151946
		3.60119	0.425609	0.297799		3.60119	0.651226	0.544575		3.60119	0.428553	0.513969		3.60119	0.623386	0.446922		3.60119	0.707898	0.323879		3.60119	0.243951	0.20066		3.60119	0.248038	0.161602		3.60119	0.0356783	0.0213226		3.60119	0.0185896	0		3.60119	0	0.026467		3.60119	0.0833991	0.262471		3.60119	0	0.108878
		3.71032	0.40052	0.308313		3.71032	0.54808	0.505299		3.71032	0.361799	0.482421		3.71032	0.765416	0.376229		3.71032	0.77417	0.42698		3.71032	0.197939	0.136547		3.71032	0.114392	0.0933378		3.71032	0.0138905	0.0281587		3.71032	0	0.0360269		3.71032	0.0493871	0		3.71032	0.0485681	0.142869		3.71032	0.0308809	0.0712913
		3.81944	0.437246	0.265638		3.81944	0.513902	0.481174		3.81944	0.323799	0.42133		3.81944	0.736349	0.388443		3.81944	0.748233	0.373935		3.81944	0.117751	0.0986158		3.81944	0.13552	0.146874		3.81944	0.0225302	0.0158791		3.81944	0.00391029	0.0171712		3.81944	0.0791273	0.0229255		3.81944	0.00530344	0.0389904		3.81944	0.0321924	0
		3.92857	0.43559	0.317267		3.92857	0.583413	0.441245		3.92857	0.30016	0.336605		3.92857	0.648775	0.375098		3.92857	0.525829	0.320584		3.92857	0.0996662	0.0902411		3.92857	0.248799	0.231541		3.92857	0.0685123	0.0417731		3.92857	0.0321026	0.0241958		3.92857	0.0505153	0.001069		3.92857	0	0		3.92857	0.0609099	0.00718403
		4.0377	0.481949	0.3058		4.0377	0.681397	0.470355		4.0377	0.235843	0.279407		4.0377	0.58783	0.43337		4.0377	0.442505	0.228677		4.0377	0.139041	0.217055		4.0377	0.391157	0.276794		4.0377	0.103906	0.0186837		4.0377	0.126514	0.0635766		4.0377	0.0902456	0.00535865		4.0377	0.0368653	0.00233982		4.0377	0.0939873	0.0579068
		4.14683	0.445132	0.33189		4.14683	0.694077	0.584359		4.14683	0.302513	0.325306		4.14683	0.697457	0.426728		4.14683	0.435559	0		4.14683	0.315562	0.404889		4.14683	0.329609	0.26374		4.14683	0.129126	0.0696228		4.14683	0.252277	0.088902		4.14683	0.0620689	0.00779428		4.14683	0.0131183	0.0268141		4.14683	0.139442	0.0868784
		4.25595	0.415981	0.359327		4.25595	0.617447	0.573384		4.25595	0.274641	0.322613		4.25595	0.774385	0.497435		4.25595	0.426288	0.0762353		4.25595	0.324995	0.422251		4.25595	0.331629	0.286204		4.25595	0.142439	0.0743659		4.25595	0.306585	0.124462		4.25595	0.0708123	0.0537804		4.25595	0.0501925	0.0352289		4.25595	0.113364	0.152271
		4.36508	0.521051	0.341657		4.36508	0.617203	0.553661		4.36508	0.303861	0.310862		4.36508	0.792704	0.478985		4.36508	0.513805	0.260896		4.36508	0.332012	0.454568		4.36508	0.378193	0.294587		4.36508	0.177464	0.106085		4.36508	0.335727	0.187388		4.36508	0.136248	0.0720039		4.36508	0.0894368	0.048111		4.36508	0.135388	0.194605
		4.47421	0.46267	0.302321		4.47421	0.550445	0.514604		4.47421	0.33972	0.279183		4.47421	0.836522	0.449077		4.47421	0.621046	0.324421		4.47421	0.377286	0.482432		4.47421	0.459815	0.244641		4.47421	0.235381	0.167451		4.47421	0.355096	0.205599		4.47421	0.162108	0.0724203		4.47421	0.178002	0.0772534		4.47421	0.177445	0.236908
		4.58333	0.439114	0.24295		4.58333	0.438634	0.49083		4.58333	0.260003	0.304031		4.58333	0.869014	0.435441		4.58333	0.759666	0.374041		4.58333	0.437245	0.552075		4.58333	0.341345	0.177693		4.58333	0.2422	0.215517		4.58333	0.371153	0.206411		4.58333	0.186413	0.0801382		4.58333	0.200449	0.158543		4.58333	0.205907	0.224171
		4.69246	0.487872	0.250921		4.69246	0.477569	0.552654		4.69246	0.318885	0.32199		4.69246	0.841445	0.429842		4.69246	0.846341	0.407963		4.69246	0.543063	0.507134		4.69246	0.108509	0.124014		4.69246	0.283611	0.26828		4.69246	0.362006	0.274422		4.69246	0.168235	0.121216		4.69246	0.214649	0.112015		4.69246	0.270935	0.228618
		4.80159	0.443687	0.265582		4.80159	0.461111	0.616778		4.80159	0.326869	0.324355		4.80159	0.791742	0.472404		4.80159	0.827149	0.16411		4.80159	0.618567	0.509082		4.80159	0	0.0848529		4.80159	0.349337	0.360061		4.80159	0.367103	0.338905		4.80159	0.197193	0.173751		4.80159	0.240286	0.167975		4.80159	0.259898	0.176153
		4.91071	0.4982	0.252349		4.91071	0.429643	0.66222		4.91071	0.334393	0.316401		4.91071	0.653433	0.538307		4.91071	0.696027	0.284441		4.91071	0.802162	0.560204		4.91071	0.00677042	0.0545711		4.91071	0.374272	0.385503		4.91071	0.370892	0.397636		4.91071	0.276233	0.210857		4.91071	0.243656	0.244284		4.91071	0.253768	0.16146
		5.01984	0.598836	0.235326		5.01984	0.470178	0.627334		5.01984	0.328774	0.36239		5.01984	0.614835	0.564733		5.01984	0.685033	0.416337		5.01984	0.804193	0.521796		5.01984	0.0681568	0.0609117		5.01984	0.377613	0.401572		5.01984	0.399618	0.399792		5.01984	0.345213	0.270615		5.01984	0.233953	0.247966		5.01984	0.205376	0.169099
		5.12897	0.557641	0.218867		5.12897	0.366647	0.598527		5.12897	0.3193	0.437657		5.12897	0.630761	0.529777		5.12897	0.698528	0.30954		5.12897	0.828969	0.609248		5.12897	0.0902125	0.0622925		5.12897	0.377083	0.428195		5.12897	0.410418	0.302545		5.12897	0.422799	0.328094		5.12897	0.311885	0.314049		5.12897	0.21924	0.193606
		5.2381	0.537305	0.228505		5.2381	0.388579	0.567334		5.2381	0.368892	0.569155		5.2381	0.58997	0.567446		5.2381	0.758109	0.404125		5.2381	0.931338	0.706142		5.2381	0.214312	0.094009		5.2381	0.392517	0.484499		5.2381	0.408585	0.280197		5.2381	0.471871	0.450295		5.2381	0.259063	0.318715		5.2381	0.243626	0.269658
		5.34722	0.430742	0.230421		5.34722	0.327149	0.540983		5.34722	0.297489	0.688564		5.34722	0.547076	0.554475		5.34722	0.741252	0.412072		5.34722	0.930822	0.6698		5.34722	0.33304	0.159421		5.34722	0.439748	0.453221		5.34722	0.438644	0.263041		5.34722	0.549691	0.462211		5.34722	0.323524	0.366833		5.34722	0.279769	0.317548
										5.45635	0.291937	0.637706		5.45635	0.554066	0.584876		5.45635	0.677443	0.452784		5.45635	0.720669	0.638258		5.45635	0.52473	0.277454		5.45635	0.436353	0.447849		5.45635	0.486492	0.257833		5.45635	0.587227	0.575507		5.45635	0.331641	0.420242		5.45635	0.289123	0.361301
										5.56548	0.256868	0.597608		5.56548	0.542375	0.605836		5.56548	0.706812	0.395099		5.56548	0.6087	0.675487		5.56548	0.570215	0.361645		5.56548	0.410844	0.391869		5.56548	0.495989	0.310141		5.56548	0.584798	0.612111		5.56548	0.340741	0.509293		5.56548	0.27791	0.430332
										5.6746	0.282778	0.523456		5.6746	0.470274	0.643336		5.6746	0.554519	0.361057		5.6746	0.523314	0.853862		5.6746	0.491015	0.343975		5.6746	0.421371	0.375221		5.6746	0.577547	0.359041		5.6746	0.567446	0.584149		5.6746	0.407135	0.428158		5.6746	0.323693	0.540316
										5.78373	0.278802	0.460068		5.78373	0.393518	0.663905		5.78373	0.612982	0.47952		5.78373	0.449846	0.945851		5.78373	0.435957	0.346975		5.78373	0.38811	0.366669		5.78373	0.641891	0.435013		5.78373	0.568062	0.585941		5.78373	0.426749	0.37145		5.78373	0.359893	0.518801
										5.89286	0.225553	0.289683		5.89286	0.417409	0.635291		5.89286	0.5761	0.501743		5.89286	0.481447	0.928028		5.89286	0.449763	0.332269		5.89286	0.359056	0.355393		5.89286	0.664174	0.52243		5.89286	0.523254	0.589817		5.89286	0.362245	0.258976		5.89286	0.343874	0.499229
														6.00198	0.420416	0.571844		6.00198	0.595336	0.552245		6.00198	0.425191	0.743855		6.00198	0.384789	0.407533		6.00198	0.341418	0.411882		6.00198	0.572692	0.468057		6.00198	0.550305	0.586437		6.00198	0.302168	0.258212		6.00198	0.345511	0.46451
														6.11111	0.355129	0.510499		6.11111	0.626085	0.598703		6.11111	0.491975	0.551625		6.11111	0.461582	0.535055		6.11111	0.376266	0.479264		6.11111	0.553283	0.449943		6.11111	0.540727	0.573085		6.11111	0.280895	0.302381		6.11111	0.308916	0.424186
																		6.22024	0.584667	0.667193		6.22024	0.502535	0.523693		6.22024	0.357232	0.607596		6.22024	0.354726	0.519158		6.22024	0.458363	0.39839		6.22024	0.543142	0.566973		6.22024	0.264639	0.303855		6.22024	0.359278	0.389822
																		6.32937	0.613382	0.754599		6.32937	0.553354	0.584355		6.32937	0.397025	0.572939		6.32937	0.353561	0.536969		6.32937	0.459553	0.359361		6.32937	0.603525	0.548306		6.32937	0.238365	0.378851		6.32937	0.346706	0.3952
																		6.43849	0.662337	0.886407		6.43849	0.634807	0.602331		6.43849	0.46005	0.479324		6.43849	0.398578	0.542317		6.43849	0.533716	0.378861		6.43849	0.630092	0.575921		6.43849	0.261294	0.312291		6.43849	0.378672	0.373536
																		6.54762	0.547035	0.889147						6.54762	0.404147	0.371536		6.54762	0.439359	0.49012		6.54762	0.595823	0.389521		6.54762	0.587741	0.566009		6.54762	0.293181	0.327431		6.54762	0.382037	0.410401
																										6.65675	0.319479	0.350958						6.65675	0.65038	0.504421						6.65675	0.271133	0.305879
																										6.76587	0.346272	0.426336						6.76587	0.739871	0.510297
																																		6.875	0.859707	0.467587
																																		6.98413	0.869963	0.423277
[truncated: 27 more columns]

## Sheet: exp1-endosome9
endosome 9		t1				t2				t3				t4				t5				t6				t7				t8				t9				t10				t11				t12
line profiles			Rab5	Snx1			Rab5	Snx1			Rab5	Snx1			Rab5	Snx1			Rab5	Snx1			Rab5	Snx1			Rab5	Snx1			Rab5	Snx1			Rab5	Snx1			Rab5	Snx1			Rab5	Snx1			Rab5	Snx1
		0	1406.38	631.473		0	1306.43	574.026		0	1388.18	617.437		0	1478.77	619.537		0	1621.93	720.278		0	1484.71	714.948		0	1374.02	731.449		0	1550.68	770.013		0	1365.84	675.419		0	1420.49	660.052		0	1483.82	617.938		0	1394.72	606.908
		0.10913	1334.79	628.408		0.10913	1261.37	562.434		0.10913	1370.49	599.147		0.10913	1468.7	590.932		0.10913	1601.56	720.996		0.10913	1475.93	690.191		0.10913	1405.94	727.191		0.10913	1543.27	757.87		0.10913	1359.88	646.591		0.10913	1413.53	652.811		0.10913	1558.14	622.791		0.10913	1457.09	618.571
		0.21825	1311.97	615.139		0.21825	1214.38	543.157		0.21825	1341.19	624.436		0.21825	1449.39	614.621		0.21825	1575.36	731.927		0.21825	1479.06	693.871		0.21825	1375.14	703.111		0.21825	1535.04	747.25		0.21825	1327.75	644.26		0.21825	1368.54	646.781		0.21825	1566.07	641.188		0.21825	1495.78	618.394
		0.32738	1340.8	628.106		0.32738	1223.86	560.282		0.32738	1380.12	635.127		0.32738	1446.42	634.552		0.32738	1563.84	714.956		0.32738	1505.82	702.154		0.32738	1407.31	687.432		0.32738	1517.05	725.537		0.32738	1305.08	606.983		0.32738	1352.95	623.988		0.32738	1591.46	638.913		0.32738	1542.75	628.499
		0.43651	1368.32	630.165		0.43651	1269.69	546.859		0.43651	1387.99	635.183		0.43651	1543.63	635.923		0.43651	1471.81	689.29		0.43651	1451.94	716.794		0.43651	1387.8	633.888		0.43651	1500.98	698.979		0.43651	1262.59	585.867		0.43651	1368.69	602.708		0.43651	1587.76	636.731		0.43651	1519.48	643.84
		0.54563	1389.71	611.362		0.54563	1268.46	556.663		0.54563	1411.13	723.043		0.54563	1562.1	682.332		0.54563	1397.83	669.737		0.54563	1406.01	688.702		0.54563	1346.29	590.883		0.54563	1470.72	691.974		0.54563	1198.27	589.499		0.54563	1332.54	592.445		0.54563	1589.66	618.451		0.54563	1547.7	640.518
		0.65476	1384.71	626.635		0.65476	1361.57	549.618		0.65476	1449.04	744.837		0.65476	1555.22	716.63		0.65476	1341.68	621.319		0.65476	1364.54	655.838		0.65476	1354.61	555.99		0.65476	1403.36	685.948		0.65476	1175.48	560.559		0.65476	1317.52	558.318		0.65476	1571.84	648.652		0.65476	1550.67	608.485
		0.76389	1360.82	650.565		0.76389	1393.59	567.204		0.76389	1382.99	738.848		0.76389	1533.73	730.243		0.76389	1303.45	588.319		0.76389	1315.74	654.639		0.76389	1364.38	550.365		0.76389	1401.04	694.712		0.76389	1161.36	524.119		0.76389	1309.73	566.461		0.76389	1499.31	651.724		0.76389	1503.4	610.661
		0.87302	1336.74	693.118		0.87302	1442.43	572.845		0.87302	1306.88	689.627		0.87302	1440.22	704.903		0.87302	1285.44	555.87		0.87302	1261.19	618.904		0.87302	1403.53	566.59		0.87302	1365.55	670.535		0.87302	1162.34	523.473		0.87302	1283.39	569.461		0.87302	1466.99	623.543		0.87302	1474.67	602.32
		0.98214	1278.94	670.074		0.98214	1440.55	561.183		0.98214	1285.29	637.522		0.98214	1320.54	705.413		0.98214	1259.03	542.114		0.98214	1226.11	616.919		0.98214	1327.97	569.199		0.98214	1292.52	636.313		0.98214	1174.43	516.79		0.98214	1230.04	559.927		0.98214	1440	603.62		0.98214	1462.53	585.285
		1.09127	1290.54	666.457		1.09127	1348.23	591.756		1.09127	1259.5	622.887		1.09127	1264.31	659.099		1.09127	1231.96	549.354		1.09127	1195.11	641.395		1.09127	1297.28	547.32		1.09127	1305.33	622.438		1.09127	1222.86	527.591		1.09127	1194.81	553.207		1.09127	1397.5	592.944		1.09127	1497.41	597.092
		1.2004	1327.03	670.071		1.2004	1272.37	547.665		1.2004	1236.99	614.223		1.2004	1244.66	614.785		1.2004	1235.22	542.369		1.2004	1157.53	629.561		1.2004	1241.48	527.804		1.2004	1291.83	617.954		1.2004	1295.76	537.565		1.2004	1219.07	555.832		1.2004	1377.02	593.857		1.2004	1543.49	584.604
		1.30952	1286.31	630.426		1.30952	1249.49	528.911		1.30952	1229.1	571.148		1.30952	1236.23	610.067		1.30952	1211.95	518.147		1.30952	1137.41	607.041		1.30952	1220.44	525.103		1.30952	1277.51	617.343		1.30952	1412.18	549.026		1.30952	1231.89	570.171		1.30952	1342.39	571.345		1.30952	1573.76	560.202
		1.41865	1260.41	632.886		1.41865	1221.4	522.703		1.41865	1219.95	563.549		1.41865	1243.73	586.188		1.41865	1214.3	511.605		1.41865	1178.07	607.716		1.41865	1223.93	515.812		1.41865	1315.17	596.253		1.41865	1552.88	547.762		1.41865	1269.48	586.863		1.41865	1353.26	567.665		1.41865	1527.72	527.083
		1.52778	1250.02	600.326		1.52778	1233.02	546.719		1.52778	1268.01	573.311		1.52778	1270.7	576.655		1.52778	1225.56	527.799		1.52778	1201.11	607.501		1.52778	1274.63	506.894		1.52778	1419.82	604.188		1.52778	1580.26	561.768		1.52778	1320.47	574.34		1.52778	1402.19	574.999		1.52778	1481.73	551.696
		1.6369	1229.07	589.689		1.6369	1246.52	532.667		1.6369	1384.88	576.189		1.6369	1365.56	549.756		1.6369	1330.72	523.706		1.6369	1299.63	605.751		1.6369	1346.94	528.313		1.6369	1528.04	601.307		1.6369	1610.55	555.284		1.6369	1329.1	559.521		1.6369	1403.12	557.99		1.6369	1426.31	552.115
		1.74603	1226.83	586.082		1.74603	1305.94	524.963		1.74603	1486.86	571.653		1.74603	1471.28	558.255		1.74603	1436.45	534.462		1.74603	1429.58	595.218		1.74603	1437.5	512.982		1.74603	1607.08	594.447		1.74603	1600.43	540.018		1.74603	1323.47	572.958		1.74603	1404.93	557.212		1.74603	1457.36	554.164
		1.85516	1230.07	560.91		1.85516	1378.91	536.34		1.85516	1595.31	575.395		1.85516	1527.22	544.941		1.85516	1490.47	535.621		1.85516	1552.52	602.708		1.85516	1493.72	540.175		1.85516	1638.17	601.054		1.85516	1553.46	558.44		1.85516	1380.26	569.187		1.85516	1450.88	551.012		1.85516	1474.46	561.942
		1.96429	1231.57	558.749		1.96429	1480.35	550.095		1.96429	1674.35	593.267		1.96429	1566.29	557.204		1.96429	1617.39	577.276		1.96429	1619.43	591.631		1.96429	1488.28	540.786		1.96429	1632.84	603.731		1.96429	1560.44	564.78		1.96429	1451.73	539.36		1.96429	1474.09	553.877		1.96429	1451.07	571.232
		2.07341	1247.76	536.271		2.07341	1566.08	562.479		2.07341	1694.3	597.382		2.07341	1513.33	548.177		2.07341	1650.95	559.221		2.07341	1635.44	587.444		2.07341	1513.47	550.995		2.07341	1579.65	588.904		2.07341	1572.23	559.333		2.07341	1526.89	536.665		2.07341	1527.61	568.294		2.07341	1474.39	531.258
		2.18254	1287.46	550.602		2.18254	1627.48	564.71		2.18254	1678.65	590.331		2.18254	1483.72	568.128		2.18254	1601.69	553.379		2.18254	1617.12	600.642		2.18254	1485.37	540.4		2.18254	1581.95	596.973		2.18254	1617.93	565.828		2.18254	1547.07	582.097		2.18254	1524.4	566.258		2.18254	1539.87	543.816
		2.29167	1351.41	578.202		2.29167	1645.82	565.42		2.29167	1642.81	577.361		2.29167	1446.07	574.722		2.29167	1569.08	556.152		2.29167	1620.55	596.951		2.29167	1467.1	545.87		2.29167	1596.39	592.386		2.29167	1624.78	598.397		2.29167	1529.22	592.822		2.29167	1444.04	568.377		2.29167	1571.21	545.463
		2.40079	1454.07	568.549		2.40079	1610.73	553.731		2.40079	1636.39	579.545		2.40079	1462.18	568.091		2.40079	1554.77	557.614		2.40079	1570.08	636.898		2.40079	1428.92	585.283		2.40079	1596.5	597.829		2.40079	1571.46	602.858		2.40079	1502.97	614.609		2.40079	1397.98	585.972		2.40079	1577.28	538.002
		2.50992	1585.02	565.68		2.50992	1581.22	574.223		2.50992	1661.62	583.378		2.50992	1529.96	564.662		2.50992	1562.65	566.565		2.50992	1569.41	616.176		2.50992	1374.92	571.793		2.50992	1543.79	617.314		2.50992	1535.43	624.206		2.50992	1485.25	655.237		2.50992	1393.6	603.884		2.50992	1549.34	517.345
		2.61905	1609.29	593.149		2.61905	1521.32	578.087		2.61905	1727	606.331		2.61905	1492.17	565.661		2.61905	1543.07	568.009		2.61905	1514.49	631.803		2.61905	1356.23	593.65		2.61905	1501.73	608.63		2.61905	1493.21	633.196		2.61905	1475.69	666.19		2.61905	1384.79	630.708		2.61905	1487.33	535.607
		2.72817	1648.52	601.368		2.72817	1525.05	577.219		2.72817	1653.88	633.552		2.72817	1487.57	594.862		2.72817	1547.89	586.002		2.72817	1489.21	644.016		2.72817	1366.55	597.029		2.72817	1456.14	625.507		2.72817	1476.92	651.498		2.72817	1492.74	684.835		2.72817	1417.62	652.729		2.72817	1413.76	562.421
		2.8373	1625.34	598.492		2.8373	1446.74	565.596		2.8373	1601.58	639.375		2.8373	1535.69	593.638		2.8373	1488.28	598.202		2.8373	1434.78	670.362		2.8373	1387.97	606.748		2.8373	1460.94	657.309		2.8373	1479.69	618.95		2.8373	1487.76	727.846		2.8373	1467.21	673.434		2.8373	1408.3	564.662
		2.94643	1547.67	608.355		2.94643	1454.94	577.166		2.94643	1573.77	667.898		2.94643	1565.38	617.553		2.94643	1469.55	583.448		2.94643	1407.33	666.138		2.94643	1386.22	612.988		2.94643	1505.68	672.004		2.94643	1515.65	645.28		2.94643	1492.26	763.205		2.94643	1508.57	703.803		2.94643	1404.12	600.052
		3.05556	1476.16	618.641		3.05556	1463.3	578.252		3.05556	1617.13	658.544		3.05556	1603.01	631.612		3.05556	1484.02	604.687		3.05556	1429.12	655.853		3.05556	1390.84	603.609		3.05556	1520.48	654.276		3.05556	1535.63	661.755		3.05556	1521.57	787.681		3.05556	1554.09	744.501		3.05556	1474.84	635.78
		3.16468	1439.12	650.173		3.16468	1523.92	568.273		3.16468	1640.56	695.432		3.16468	1626.46	656.959		3.16468	1468.86	619.649		3.16468	1424.43	674.502		3.16468	1402.29	605.647		3.16468	1515.41	642.068		3.16468	1494.18	662.615		3.16468	1550.04	765.868		3.16468	1568.94	766.715		3.16468	1502.64	657.807
		3.27381	1437.89	617.368		3.27381	1581.52	578.154		3.27381	1692.62	690.83		3.27381	1672.65	668.832		3.27381	1495.11	658.3		3.27381	1408.59	669.468		3.27381	1478.63	615.301		3.27381	1563.88	646.512		3.27381	1474.1	647.693		3.27381	1535.4	777.569		3.27381	1543.13	745.968		3.27381	1520.47	682.832
		3.38294	1425.23	616.71		3.38294	1637.25	592.167		3.38294	1712.52	699.416		3.38294	1622.56	639.875		3.38294	1535.5	631.667		3.38294	1459.28	679.588		3.38294	1544.17	606.657		3.38294	1593.68	671.277		3.38294	1461.32	646.747		3.38294	1537.97	744.218		3.38294	1580.95	698.799		3.38294	1510.89	720.682
		3.49206	1419.39	634.712		3.49206	1655.37	601.343		3.49206	1712.1	719.63		3.49206	1623.31	646.793		3.49206	1561.24	654.42		3.49206	1500.73	694.653		3.49206	1582.68	628.852		3.49206	1650.76	661.954		3.49206	1521.81	674.308		3.49206	1556.96	741.619		3.49206	1593.6	667.478		3.49206	1536.28	729.248
		3.60119	1497.35	635.136		3.60119	1691	612.551		3.60119	1744.06	726.467		3.60119	1594.85	669.047		3.60119	1584.54	660.66		3.60119	1544.04	725.507		3.60119	1653.55	632.552		3.60119	1634.22	644.44		3.60119	1594.55	688.632		3.60119	1620.41	713.683		3.60119	1585.1	662.946		3.60119	1546.01	701.865
		3.71032	1567.69	638.558		3.71032	1731.9	621.175		3.71032	1746.54	740.627		3.71032	1605.83	669.871		3.71032	1633.8	646.349		3.71032	1597.98	736.785		3.71032	1716.52	634.167		3.71032	1610.97	666.006		3.71032	1662.89	672.758		3.71032	1624.06	691.034		3.71032	1541.55	637.924		3.71032	1553.44	694.965
		3.81944	1667.33	675.38		3.81944	1716.4	631.232		3.81944	1732.12	775.732		3.81944	1630.13	666.708		3.81944	1654.5	639.72		3.81944	1643.55	723.028		3.81944	1732.73	631.179		3.81944	1626.53	682.038		3.81944	1586.26	650.142		3.81944	1600.73	667.849		3.81944	1523.17	642.981		3.81944	1549.39	670.883
		3.92857	1691.71	655.232		3.92857	1709.9	646.839		3.92857	1707.08	800.762		3.92857	1658.61	677.859		3.92857	1639.98	667.532		3.92857	1710.47	721.421		3.92857	1745.41	651.641		3.92857	1663.69	689.94		3.92857	1620.69	649.758		3.92857	1647.47	648.201		3.92857	1515.16	637.73		3.92857	1499.61	624.851
		4.0377	1686.38	666.931		4.0377	1735.36	629.96		4.0377	1728.07	807.122		4.0377	1737.06	675.78		4.0377	1622.08	648.608		4.0377	1764.33	746.657		4.0377	1746.43	634.893		4.0377	1691.21	687.74		4.0377	1545.01	627.029		4.0377	1554.18	656.178		4.0377	1536.17	650.532		4.0377	1503.96	606.503
		4.14683	1674.34	664.753		4.14683	1689.76	636.445		4.14683	1767.15	784.085		4.14683	1770	683.279		4.14683	1614.43	674.292		4.14683	1781.13	742.656		4.14683	1695.41	638.698		4.14683	1703.79	680.397		4.14683	1614.71	638.145		4.14683	1558.88	650.389		4.14683	1537.38	647.711		4.14683	1462.07	586.666
		4.25595	1633.97	653.781		4.25595	1678.31	653.772		4.25595	1789.54	770.67		4.25595	1774.4	689.216		4.25595	1550.48	650.662		4.25595	1742.1	724.242		4.25595	1660.89	638.941		4.25595	1722.26	696.441		4.25595	1585.38	665.427		4.25595	1565.92	669.695		4.25595	1542.4	647.055		4.25595	1461.76	570.168
		4.36508	1583.95	640.704		4.36508	1611.89	655.482		4.36508	1784.52	755.304		4.36508	1738.2	672.931		4.36508	1598.66	645.221		4.36508	1688.42	730.733		4.36508	1639.39	620.359		4.36508	1708.06	716.3		4.36508	1611.86	668.268		4.36508	1591.92	663.796		4.36508	1547.47	641.604		4.36508	1433.47	556.295
		4.47421	1515.83	631.971		4.47421	1589.75	655.946		4.47421	1763.74	759.506		4.47421	1696.64	647.369		4.47421	1621.8	669.422		4.47421	1664.3	708.255		4.47421	1659.19	610.221		4.47421	1693.92	734.897		4.47421	1576.13	684.375		4.47421	1532	657.984		4.47421	1573.17	662.474		4.47421	1481.36	567.412
		4.58333	1434.63	624.596		4.58333	1512.52	662.028		4.58333	1751.07	769.375		4.58333	1659.31	649.357		4.58333	1591.92	670.671		4.58333	1629.97	718.587		4.58333	1650.01	629.867		4.58333	1681.08	771.685		4.58333	1539.25	648.714		4.58333	1572.68	647.944		4.58333	1543.06	649.209		4.58333	1471.2	559.911
		4.69246	1361.95	621.277		4.69246	1441.03	659.488		4.69246	1719.38	748.351		4.69246	1586.49	653.92		4.69246	1619.69	668.419		4.69246	1581.01	717.527		4.69246	1594.57	606.055		4.69246	1690.58	800.415		4.69246	1530.04	640.975		4.69246	1539.67	633.063		4.69246	1556.24	630.531		4.69246	1477.54	563.013
		4.80159	1344.67	586.267		4.80159	1445.28	666.57		4.80159	1690.23	737.02		4.80159	1524.85	636.411		4.80159	1589.9	675.017		4.80159	1556.43	714.514		4.80159	1608.08	607.028		4.80159	1678.27	771.77		4.80159	1518.19	613.619		4.80159	1514.63	629.31		4.80159	1551.68	623.075		4.80159	1426.44	561.073
		4.91071	1295.46	585.096		4.91071	1429.05	683.193		4.91071	1597.11	723.604		4.91071	1498.39	614.196		4.91071	1563.11	639.198		4.91071	1560.08	706.98		4.91071	1560.14	617.406		4.91071	1630.43	723.838		4.91071	1504.36	616.326		4.91071	1524.92	602.332		4.91071	1584.55	653.491		4.91071	1471.61	552.405
		5.01984	1300.38	570.008		5.01984	1452.08	680.291		5.01984	1545.5	706.726		5.01984	1530.38	619.143		5.01984	1558.29	632.477		5.01984	1526.48	687.493		5.01984	1553.81	628.307		5.01984	1642.04	706.694		5.01984	1531.88	623.215		5.01984	1480.48	627.158		5.01984	1578.25	639.953		5.01984	1448.7	549.001
		5.12897	1310.02	571.466		5.12897	1523.26	689.446		5.12897	1490.8	703.631		5.12897	1464.43	617.805		5.12897	1490.61	635.19		5.12897	1496.18	682.143		5.12897	1571.36	608.934		5.12897	1602.53	700.625		5.12897	1533.12	592.562		5.12897	1463.07	610.147		5.12897	1564.03	606.201		5.12897	1443.64	534.754
		5.2381	1300.99	570.4		5.2381	1547.65	681.224		5.2381	1452.72	679.749		5.2381	1485.71	583.682		5.2381	1502.04	620.115		5.2381	1466.65	679.372		5.2381	1549.6	595.5		5.2381	1609.43	688.353		5.2381	1485.88	598.223		5.2381	1478.6	596.624		5.2381	1550.82	607.973		5.2381	1414.73	522.35
		5.34722	1263.19	541.769		5.34722	1603.52	669.521		5.34722	1459.01	676.963		5.34722	1461.03	585.316		5.34722	1506.28	603.432		5.34722	1496.15	652.096		5.34722	1564.19	582.345		5.34722	1583.96	674.266		5.34722	1462.68	593.927		5.34722	1472.93	581.092		5.34722	1555.97	597.797		5.34722	1448.36	535.202
		5.45635	1261.45	533.068		5.45635	1620	684.165		5.45635	1470.64	650.358		5.45635	1469.73	591.556		5.45635	1474.75	604.447		5.45635	1465.55	641.174		5.45635	1503.86	579.908		5.45635	1612.33	678.195		5.45635	1443.85	581.307		5.45635	1460.77	564.595		5.45635	1584.7	604.794		5.45635	1447.15	532.662
		5.56548	1311.27	516.029		5.56548	1603.92	665.976		5.56548	1466.12	626.831		5.56548	1436.14	602.993		5.56548	1486.42	624.182		5.56548	1500.68	654.72		5.56548	1496.03	593.469		5.56548	1562.52	660.865		5.56548	1455.1	576.442		5.56548	1432.13	567.542		5.56548	1576.53	625.956		5.56548	1412.29	541.216
		5.6746	1272.33	540.567		5.6746	1579.95	660.511		5.6746	1434.97	617.821		5.6746	1441.56	590.953		5.6746	1470.42	618.465		5.6746	1513.51	615.954		5.6746	1451.6	605.054		5.6746	1594.17	649.386		5.6746	1459.59	580.33		5.6746	1432.77	562.792		5.6746	1567.81	611.399		5.6746	1446.2	541.738
		5.78373	1238.4	526.19		5.78373	1535.66	634.332		5.78373	1432.26	630.034		5.78373	1453.24	602.323		5.78373	1424.64	613.1		5.78373	1454.72	609.213		5.78373	1461.66	601.522		5.78373	1574.69	648.152		5.78373	1437.05	557.363		5.78373	1425.69	565.342		5.78373	1533.25	583.053		5.78373	1424.1	531.762
		5.89286	1277.01	516.021		5.89286	1509.29	629.323		5.89286	1464.37	621.319		5.89286	1465.95	588.304		5.89286	1430.73	590.544		5.89286	1420.73	598.465		5.89286	1434.01	597.092		5.89286	1557.58	623.546		5.89286	1386.53	559.568		5.89286	1426.67	544.692		5.89286	1488.46	586.7		5.89286	1473.79	571.549
		6.00198	1251.95	503.489		6.00198	1496.91	611.934		6.00198	1450.1	613.82		6.00198	1463.47	581.337		6.00198	1456.77	603.315		6.00198	1412.32	594.462		6.00198	1408.76	600.034		6.00198	1589.36	606.822		6.00198	1375.66	571.72		6.00198	1389.2	558.087		6.00198	1527.79	589.494		6.00198	1483.34	560.273
		6.11111	1184.51	520.354		6.11111	1486.02	585.575		6.11111	1453.4	641.68		6.11111	1467.82	595.239		6.11111	1442.13	581.78		6.11111	1382.92	587.704		6.11111	1386.33	583.111		6.11111	1553.94	604.402		6.11111	1394.66	564.683		6.11111	1400.39	548.334		6.11111	1533.71	570.873		6.11111	1489.82	573.674
		6.22024	1182.28	527.052		6.22024	1430.8	557.016		6.22024	1431.86	636.355		6.22024	1485.78	613.963		6.22024	1385.03	580.282		6.22024	1356.08	590.195		6.22024	1401.95	592.098		6.22024	1515.98	600.263		6.22024	1390.38	558.739		6.22024	1382.68	512.671		6.22024	1490.15	554.544		6.22024	1467.22	552.27
		6.32937	1203.98	510.865		6.32937	1403.75	554.336		6.32937	1423.73	608.234		6.32937	1509.81	596.168		6.32937	1365.64	563.944		6.32937	1351.79	590.159		6.32937	1367.27	545.142		6.32937	1468.89	599.888		6.32937	1371.34	557.676		6.32937	1377.13	533.158		6.32937	1444.84	566.961		6.32937	1494.51	541.387
		6.43849	1158.03	512.871		6.43849	1392.06	558.25		6.43849	1403.58	622.429		6.43849	1444.63	565.261		6.43849	1355.47	566.196		6.43849	1335.35	576.182		6.43849	1306.18	551.636		6.43849	1413.6	600.992		6.43849	1369.31	554.966		6.43849	1332.64	536.219		6.43849	1458.65	577.681		6.43849	1436.94	562.876
		6.54762	1149.59	504.381		6.54762	1347.1	533.542		6.54762	1381.76	626.199		6.54762	1363.94	555.327		6.54762	1331.2	574.175		6.54762	1329.14	588.405		6.54762	1303.61	559.141		6.54762	1410.26	579.383		6.54762	1318.79	549.225		6.54762	1311.94	544.348		6.54762	1459.94	574.141		6.54762	1453.69	536.677
		6.65675	1135.54	500.571		6.65675	1314.51	515.084		6.65675	1333.2	626.649		6.65675	1299.21	545.314		6.65675	1292.37	559.938		6.65675	1306.83	608.636		6.65675	1302.87	579.502		6.65675	1387.56	564.677		6.65675	1284.3	550.524		6.65675	1311.34	527.009		6.65675	1430.6	577.506		6.65675	1399.47	517.411
		6.76587	1143.05	506.502		6.76587	1288.96	513.58		6.76587	1298.59	631.216		6.76587	1288.85	546.101		6.76587	1278.36	579.445		6.76587	1285.25	608.967		6.76587	1311.17	585.404		6.76587	1376.42	568.003		6.76587	1255.6	549.328		6.76587	1305.3	529.371		6.76587	1401.16	569.677		6.76587	1408.58	548.584
		6.875	1133.47	514.254		6.875	1244.56	513.256		6.875	1294.45	621.43		6.875	1275.59	536.638		6.875	1296.46	578.016		6.875	1308.38	651.249		6.875	1314.32	583.146		6.875	1356.87	553.515		6.875	1247.54	542.055		6.875	1302.62	547.134		6.875	1362.97	561.647		6.875	1396.14	536.726
		6.98413	1166.76	507.186		6.98413	1219.35	522.47		6.98413	1312.44	589.628		6.98413	1254.06	544.854		6.98413	1320.66	576.675		6.98413	1296.49	654.682		6.98413	1271.04	605.557		6.98413	1354.45	564.354		6.98413	1271.45	573.304		6.98413	1256.7	557.496		6.98413	1378.05	558.173		6.98413	1342.44	533.983
		7.09325	1159.35	505.194		7.09325	1203.45	512.404		7.09325	1281.9	567.451		7.09325	1265.54	547.759		7.09325	1318.62	590.914		7.09325	1307.6	649.611		7.09325	1258.02	569.326		7.09325	1342.84	563.219		7.09325	1239.14	579.379		7.09325	1255.1	547.485		7.09325	1376.78	559.746		7.09325	1286.7	528.029
		7.20238	1157.2	509.831		7.20238	1163.71	525.3		7.20238	1276.07	563.99		7.20238	1235.27	549.826		7.20238	1292.5	578.414		7.20238	1285.24	647.321		7.20238	1226.09	544.054		7.20238	1316.27	567.875		7.20238	1248.01	580.823		7.20238	1244.07	552.347		7.20238	1338.16	539.454		7.20238	1277	537.988
		7.31151	1145.55	512.115		7.31151	1181.46	536.932		7.31151	1268.94	563.869		7.31151	1239.77	549.827		7.31151	1346.44	569.11		7.31151	1327.12	666.264		7.31151	1251.55	552.543		7.31151	1360.14	575.471		7.31151	1193.2	587.381		7.31151	1266.88	558.605		7.31151	1358.05	555.768		7.31151	1274.77	546.862
		7.42063	1145.85	518.477		7.42063	1202.58	528.974		7.42063	1267.97	554.35		7.42063	1283.59	574.8		7.42063	1384.83	577.214		7.42063	1375.95	673.152		7.42063	1287.86	550.698		7.42063	1358.66	595.617		7.42063	1249.88	594.998		7.42063	1237.92	561.704		7.42063	1342.12	562.993		7.42063	1247.65	551.915
		7.52976	1188.84	547.5		7.52976	1226.72	567.521		7.52976	1285.61	567.025		7.52976	1300.64	583.798		7.52976	1382.54	574.985		7.52976	1455.04	729.632		7.52976	1305.19	589.377		7.52976	1386.48	624.101		7.52976	1246.12	610.53		7.52976	1198.69	594.234		7.52976	1344.59	594.328		7.52976	1234.73	582.173
		7.63889	1252.26	561.046		7.63889	1279.39	560.297		7.63889	1282.85	579.243		7.63889	1329.52	585.763		7.63889	1440.43	573.75		7.63889	1522.69	747.029		7.63889	1334.8	623.6		7.63889	1429.82	649.755		7.63889	1244.8	600.623		7.63889	1229.17	643.79		7.63889	1419.66	615.657		7.63889	1239.61	576.383
		7.74802	1293.21	607.506		7.74802	1296.81	555.155		7.74802	1311.58	569.975		7.74802	1363.1	574.766		7.74802	1505.79	609.187		7.74802	1572.04	796.373		7.74802	1381.96	655.749		7.74802	1452.52	659.393		7.74802	1268.75	606.825		7.74802	1228.67	651.451		7.74802	1419.04	616.891		7.74802	1247.88	552.124
		7.85714	1394.32	641.756		7.85714	1319.07	575.965		7.85714	1347.5	606.035		7.85714	1373.79	577.198		7.85714	1536.19	621.962		7.85714	1577.6	820.769		7.85714	1374.05	677.293		7.85714	1472.01	687.603		7.85714	1264.66	650.403		7.85714	1282.05	659.263		7.85714	1430.62	611.59		7.85714	1253.48	554.113
		7.96627	1371.95	673.424		7.96627	1318.12	585.548		7.96627	1348.35	615.057		7.96627	1417.65	575.306		7.96627	1564.01	656.73		7.96627	1576.2	806.465		7.96627	1388.45	692.358		7.96627	1496.42	735.366		7.96627	1327.85	644.951		7.96627	1301.87	670.756		7.96627	1425.02	623.079		7.96627	1227.27	559.846
		8.0754	1406.55	664.204		8.0754	1288.96	572.266		8.0754	1333.66	617.017		8.0754	1431.16	597.074		8.0754	1594.32	691.629		8.0754	1499.04	770.078						8.0754	1577.29	758.856		8.0754	1325.16	636.659		8.0754	1353.24	694.706		8.0754	1417.51	626.171		8.0754	1229.83	565.296
		8.18452	1394.97	645.956		8.18452	1298.07	573.43		8.18452	1369.38	617.053		8.18452	1465.38	610.534		8.18452	1660.32	727.129		8.18452	1479.96	729.638						8.18452	1572.6	766.432		8.18452	1326.18	682.632		8.18452	1414.37	682.326		8.18452	1447.88	619.947		8.18452	1256.94	581.823
																		8.29365	1656.72	721.82														8.29365	1369.11	686.354		8.29365	1399.67	661.864						8.29365	1293.64	576.663
																																														8.40278	1355.28	596.326
		t1				t2				t3				t4				t5				t6				t7				t8				t9				t10				t11				t12
			Rab5	Snx1			Rab5	Snx1			Rab5	Snx1			Rab5	Snx1			Rab5	Snx1			Rab5	Snx1			Rab5	Snx1			Rab5	Snx1			Rab5	Snx1			Rab5	Snx1			Rab5	Snx1			Rab5	Snx1
		0	0.488868	0.679844		0	0.249659	0.348064		0	0.29536	0.249581		0	0.451659	0.428186		0	0.914383	0.947127		0	0.539516	0.567348		0	0.291974	1		0	0.614204	0.876865		0	0.407699	0.92311		0	0.498564	0.535911		0	0.570234	0.345347		0	0.478414	0.42266
		0.10913	0.360634	0.663926		0.10913	0.170837	0.282588		0.10913	0.264286	0.177223		0.10913	0.432976	0.280437		0.10913	0.868948	0.950386		0.10913	0.525883	0.466129		0.10913	0.352674	0.981038		0.10913	0.597536	0.827683		0.10913	0.395829	0.755351		0.10913	0.483177	0.509581		0.10913	0.861204	0.366702		0.10913	0.656627	0.4777
		0.21825	0.319751	0.595013		0.21825	0.0886217	0.173705		0.21825	0.212857	0.27727		0.21825	0.397161	0.402794		0.21825	0.810511	1		0.21825	0.530732	0.481174		0.21825	0.294115	0.873804		0.21825	0.579043	0.78467		0.21825	0.331767	0.741786		0.21825	0.383799	0.487655		0.21825	0.892217	0.447653		0.21825	0.76714	0.476864
		0.32738	0.3714	0.662358		0.32738	0.105209	0.270433		0.32738	0.281209	0.319565		0.32738	0.39166	0.505741		0.32738	0.784816	0.922972		0.32738	0.572311	0.51504		0.32738	0.355272	0.803981		0.32738	0.538601	0.696727		0.32738	0.286553	0.52486		0.32738	0.349343	0.404774		0.32738	0.991614	0.437642		0.32738	0.901347	0.524551
		0.43651	0.420691	0.673051		0.43651	0.185385	0.194615		0.43651	0.295017	0.319786		0.43651	0.571953	0.512822		0.43651	0.57955	0.806479		0.43651	0.48861	0.574896		0.43651	0.318171	0.565536		0.43651	0.502453	0.589162		0.43651	0.201826	0.40198		0.43651	0.384133	0.327395		0.43651	0.977122	0.428041		0.43651	0.834855	0.596948
		0.54563	0.459015	0.575397		0.54563	0.18323	0.249992		0.54563	0.335643	0.667372		0.54563	0.606222	0.752532		0.54563	0.414562	0.717731		0.54563	0.417257	0.460041		0.54563	0.239262	0.374024		0.54563	0.434425	0.56079		0.54563	0.0735773	0.423115		0.54563	0.304257	0.290077		0.54563	0.984595	0.347605		0.54563	0.915492	0.581271
		0.65476	0.450053	0.654718		0.65476	0.346116	0.210199		0.65476	0.402202	0.753592		0.65476	0.593455	0.929687		0.65476	0.289341	0.497971		0.65476	0.352842	0.325676		0.65476	0.255081	0.218637		0.65476	0.282965	0.536383		0.65476	0.028156	0.254705		0.65476	0.271086	0.165983		0.65476	0.914805	0.480496		0.65476	0.923989	0.430102
		0.76389	0.40725	0.778999		0.76389	0.402136	0.309531		0.76389	0.286235	0.729899		0.76389	0.553594	1		0.76389	0.204057	0.34819		0.76389	0.277021	0.320773		0.76389	0.273645	0.193587		0.76389	0.27776	0.571879		0.76389	0	0.0426496		0.76389	0.253879	0.195593		0.76389	0.630867	0.494013		0.76389	0.788919	0.440371
		0.87302	0.36413	1		0.87302	0.487572	0.341394		0.87302	0.152619	0.535174		0.87302	0.380152	0.869115		0.87302	0.163894	0.20091		0.87302	0.192285	0.17467		0.87302	0.348086	0.265841		0.87302	0.197957	0.473957		0.87302	0.00194008	0.0388904		0.87302	0.195686	0.206502		0.87302	0.50434	0.370011		0.87302	0.706842	0.401009
		0.98214	0.260581	0.88032		0.98214	0.484276	0.275522		0.98214	0.114719	0.32904		0.98214	0.158165	0.871749		0.98214	0.104985	0.138475		0.98214	0.137786	0.166554		0.98214	0.204432	0.27746		0.98214	0.0337487	0.33535		0.98214	0.0260524	0		0.98214	0.0778149	0.171834		0.98214	0.398682	0.282345		0.98214	0.672164	0.320618
		1.09127	0.281362	0.861535		1.09127	0.322789	0.44821		1.09127	0.0694389	0.271142		1.09127	0.0538692	0.63253		1.09127	0.0446306	0.171336		1.09127	0.0896265	0.266625		1.09127	0.146082	0.180027		1.09127	0.0625486	0.279154		1.09127	0.122622	0.0628542		1.09127	0	0.147398		1.09127	0.232294	0.235368		1.09127	0.771823	0.376337
		1.2004	0.346724	0.880305		1.2004	0.19007	0.199167		1.2004	0.029916	0.236866		1.2004	0.0174185	0.403641		1.2004	0.0518969	0.139632		1.2004	0.0312483	0.218241		1.2004	0.0399859	0.0931175		1.2004	0.0322018	0.260992		1.2004	0.26797	0.120896		1.2004	0.0535872	0.156943		1.2004	0.152111	0.239386		1.2004	0.903452	0.317405
		1.30952	0.273781	0.674407		1.30952	0.150055	0.0932378		1.30952	0.0160588	0.0664551		1.30952	0.00179731	0.379272		1.30952	0	0.0296929		1.30952	0	0.126168		1.30952	0	0.0810893		1.30952	0	0.258518		1.30952	0.500113	0.187591		1.30952	0.0819084	0.209083		1.30952	0.0165636	0.140328		1.30952	0.98994	0.202248
		1.41865	0.227392	0.687183		1.41865	0.100906	0.0581726		1.41865	0	0.0363925		1.41865	0.015701	0.255933		1.41865	0.00523229	0		1.41865	0.0631505	0.128928		1.41865	0.00662947	0.0397141		1.41865	0.0846843	0.173098		1.41865	0.780656	0.180235		1.41865	0.164963	0.269779		1.41865	0.0591061	0.124135		1.41865	0.858422	0.045955
		1.52778	0.208773	0.518081		1.52778	0.121235	0.193824		1.52778	0.0843759	0.0750123		1.52778	0.0657289	0.206694		1.52778	0.0303455	0.0735015		1.52778	0.0989536	0.128049		1.52778	0.103024	0		1.52778	0.319976	0.205237		1.52778	0.835249	0.26174		1.52778	0.277597	0.224243		1.52778	0.250655	0.156406		1.52778	0.72701	0.162107
		1.6369	0.171242	0.462838		1.6369	0.14486	0.114453		1.6369	0.289561	0.086398		1.6369	0.241672	0.0677565		1.6369	0.264884	0.0549242		1.6369	0.252002	0.120894		1.6369	0.240494	0.0953842		1.6369	0.563302	0.193568		1.6369	0.895643	0.224008		1.6369	0.296673	0.170357		1.6369	0.254288	0.0815626		1.6369	0.568685	0.164085
		1.74603	0.167242	0.444105		1.74603	0.248802	0.070938		1.74603	0.468604	0.068453		1.74603	0.437761	0.111655		1.74603	0.500691	0.103744		1.74603	0.453871	0.0778292		1.74603	0.412662	0.0271114		1.74603	0.741016	0.165784		1.74603	0.875464	0.135171		1.74603	0.284233	0.219217		1.74603	0.261393	0.0781392		1.74603	0.657378	0.173754
		1.85516	0.173033	0.313373		1.85516	0.376459	0.1352		1.85516	0.658992	0.0832568		1.85516	0.541525	0.0428863		1.85516	0.621172	0.109004		1.85516	0.644851	0.108452		1.85516	0.519555	0.148209		1.85516	0.810922	0.192544		1.85516	0.781806	0.242374		1.85516	0.409684	0.205505		1.85516	0.44128	0.0508578		1.85516	0.706257	0.21046
		1.96429	0.175726	0.30215		1.96429	0.553896	0.212893		1.96429	0.797759	0.153961		1.96429	0.613988	0.106227		1.96429	0.904249	0.298068		1.96429	0.74881	0.0631636		1.96429	0.509212	0.15093		1.96429	0.798927	0.203386		1.96429	0.795718	0.279268		1.96429	0.567576	0.0970474		1.96429	0.532158	0.0634645		1.96429	0.639411	0.2543
		2.07341	0.204731	0.185409		2.07341	0.703875	0.282842		2.07341	0.832783	0.17024		2.07341	0.515754	0.0596007		2.07341	0.979102	0.21612		2.07341	0.773678	0.046045		2.07341	0.557101	0.196393		2.07341	0.679356	0.143333		2.07341	0.81923	0.24757		2.07341	0.733613	0.0872477		2.07341	0.74166	0.126903		2.07341	0.706037	0.0656574
		2.18254	0.275848	0.259838		2.18254	0.811281	0.295444		2.18254	0.805309	0.142346		2.18254	0.460829	0.162651		2.18254	0.86924	0.189604		2.18254	0.745217	0.100005		2.18254	0.50367	0.149211		2.18254	0.684527	0.176015		2.18254	0.910348	0.285367		2.18254	0.778195	0.252449		2.18254	0.729086	0.117944		2.18254	0.893118	0.12492
		2.29167	0.390404	0.403179		2.29167	0.843359	0.299454		2.29167	0.742387	0.0910346		2.29167	0.390999	0.19671		2.29167	0.79649	0.20219		2.29167	0.750545	0.0849146		2.29167	0.468949	0.17357		2.29167	0.716992	0.157436		2.29167	0.924006	0.474896		2.29167	0.73876	0.291448		2.29167	0.414498	0.127268		2.29167	0.982666	0.132693
		2.40079	0.5743	0.353046		2.40079	0.78199	0.23343		2.40079	0.731123	0.0996748		2.40079	0.420882	0.16246		2.40079	0.764587	0.208826		2.40079	0.672132	0.248239		2.40079	0.396361	0.349086		2.40079	0.717228	0.179482		2.40079	0.817687	0.500855		2.40079	0.680761	0.37067		2.40079	0.234185	0.20469		2.40079	1	0.0974833
		2.50992	0.808883	0.338146		2.50992	0.730353	0.349177		2.50992	0.775421	0.114839		2.50992	0.546597	0.144748		2.50992	0.782151	0.249453		2.50992	0.671093	0.163516		2.50992	0.293685	0.289012		2.50992	0.598723	0.2584		2.50992	0.74586	0.625086		2.50992	0.641628	0.518403		2.50992	0.21705	0.283507		2.50992	0.920186	0
		2.61905	0.852367	0.480807		2.61905	0.625578	0.371002		2.61905	0.890201	0.205644		2.61905	0.4765	0.149908		2.61905	0.738493	0.256007		2.61905	0.585785	0.227408		2.61905	0.258163	0.386346		2.61905	0.504151	0.223228		2.61905	0.661665	0.677401		2.61905	0.620504	0.558231		2.61905	0.182533	0.401538		2.61905	0.743007	0.0861809
		2.72817	0.922627	0.523493		2.72817	0.632101	0.3661		2.72817	0.761816	0.313334		2.72817	0.467972	0.300736		2.72817	0.749234	0.337674		2.72817	0.546505	0.277341		2.72817	0.277772	0.401394		2.72817	0.401645	0.291584		2.72817	0.629198	0.783906		2.72817	0.658175	0.626028		2.72817	0.311061	0.498436		2.72817	0.53282	0.21272
		2.8373	0.881104	0.508556		2.8373	0.495103	0.300448		2.8373	0.669997	0.33637		2.8373	0.557226	0.294414		2.8373	0.616283	0.393047		2.8373	0.461946	0.385057		2.8373	0.318496	0.444675		2.8373	0.41244	0.420389		2.8373	0.634716	0.5945		2.8373	0.647171	0.782426		2.8373	0.505209	0.589542		2.8373	0.517227	0.223296
		2.94643	0.741981	0.55978		2.94643	0.509461	0.3658		2.94643	0.621186	0.449211		2.94643	0.612289	0.417939		2.94643	0.574526	0.326082		2.94643	0.419312	0.367787		2.94643	0.315172	0.472463		2.94643	0.513027	0.479907		2.94643	0.706425	0.747722		2.94643	0.657103	0.911		2.94643	0.66713	0.723173		2.94643	0.505278	0.390306
		3.05556	0.613879	0.613201		3.05556	0.524068	0.371934		3.05556	0.697311	0.412205		3.05556	0.682095	0.490556		3.05556	0.606796	0.422482		3.05556	0.453156	0.325737		3.05556	0.323952	0.430696		3.05556	0.546308	0.408104		3.05556	0.746253	0.843595		3.05556	0.721858	1		3.05556	0.845313	0.902253		3.05556	0.707339	0.558911
		3.16468	0.547532	0.776964		3.16468	0.630119	0.315569		3.16468	0.738438	0.558139		3.16468	0.725594	0.621477		3.16468	0.572969	0.490391		3.16468	0.445867	0.401984		3.16468	0.345723	0.439772		3.16468	0.534918	0.358659		3.16468	0.663599	0.848599		3.16468	0.784745	0.920683		3.16468	0.903449	1		3.16468	0.786756	0.66286
		3.27381	0.545316	0.60659		3.27381	0.73089	0.371381		3.27381	0.82983	0.539933		3.27381	0.811266	0.682803		3.27381	0.631528	0.665821		3.27381	0.421273	0.381402		3.27381	0.490854	0.482764		3.27381	0.643898	0.376659		3.27381	0.623568	0.761764		3.27381	0.752419	0.96323		3.27381	0.802419	0.908708		3.27381	0.8377	0.780956
		3.38294	0.522637	0.603172		3.38294	0.828374	0.450532		3.38294	0.864772	0.573901		3.38294	0.718355	0.533235		3.38294	0.721603	0.544939		3.38294	0.500012	0.422778		3.38294	0.615468	0.44427		3.38294	0.710901	0.476962		3.38294	0.598085	0.756259		3.38294	0.75809	0.841958		3.38294	0.950501	0.701154		3.38294	0.810316	0.959576
		3.49206	0.512176	0.696666		3.49206	0.860067	0.502361		3.49206	0.864033	0.65387		3.49206	0.719742	0.568968		3.49206	0.779006	0.64821		3.49206	0.56441	0.484372		3.49206	0.688683	0.54311		3.49206	0.839229	0.439202		3.49206	0.718693	0.916644		3.49206	0.800046	0.832508		3.49206	1	0.563335		3.49206	0.882867	1
		3.60119	0.65184	0.698868		3.60119	0.922397	0.565668		3.60119	0.920143	0.680918		3.60119	0.66696	0.683913		3.60119	0.830986	0.676533		3.60119	0.631679	0.610519		3.60119	0.823413	0.559587		3.60119	0.802045	0.368267		3.60119	0.863724	1		3.60119	0.940201	0.730926		3.60119	0.966744	0.543393		3.60119	0.910675	0.870776
		3.71032	0.777833	0.716641		3.71032	0.993949	0.61438		3.71032	0.924502	0.736937		3.71032	0.687324	0.688169		3.71032	0.940839	0.611578		3.71032	0.715475	0.656629		3.71032	0.943143	0.566779		3.71032	0.749756	0.455614		3.71032	1	0.907624		3.71032	0.948271	0.648569		3.71032	0.796253	0.43329		3.71032	0.931883	0.838214
		3.81944	0.956332	0.907877		3.81944	0.966834	0.671185		3.81944	0.899176	0.875817		3.81944	0.732403	0.671832		3.81944	0.987004	0.58149		3.81944	0.786271	0.600384		3.81944	0.973952	0.553472		3.81944	0.78475	0.520547		3.81944	0.847209	0.776015		3.81944	0.896738	0.564263		3.81944	0.724294	0.455542		3.81944	0.920309	0.724567
		3.92857	1	0.803238		3.92857	0.955467	0.75934		3.92857	0.855223	0.974839		3.92857	0.785228	0.729428		3.92857	0.954622	0.707723		3.92857	0.890237	0.593813		3.92857	0.998065	0.644595		3.92857	0.868301	0.552552		3.92857	0.915865	0.773781		3.92857	1	0.492818		3.92857	0.69294	0.432437		3.92857	0.778097	0.507336
		4.0377	0.990465	0.863997		4.0377	1	0.664001		4.0377	0.892072	1		4.0377	0.93073	0.71869		4.0377	0.914695	0.621831		4.0377	0.973897	0.696991		4.0377	1	0.570012		4.0377	0.930187	0.543641		4.0377	0.764954	0.641514		4.0377	0.7939	0.521825		4.0377	0.775175	0.488768		4.0377	0.790533	0.420749
		4.14683	0.968886	0.852685		4.14683	0.920237	0.70063		4.14683	0.960684	0.908863		4.14683	0.991824	0.757424		4.14683	0.897654	0.738406		4.14683	1	0.680633		4.14683	0.902995	0.586956		4.14683	0.958467	0.5139		4.14683	0.903927	0.706201		4.14683	0.80429	0.500775		4.14683	0.779928	0.476355		4.14683	0.670835	0.327136
		4.25595	0.896565	0.795702		4.25595	0.900203	0.7985		4.25595	1	0.855791		4.25595	1	0.788089		4.25595	0.755026	0.631153		4.25595	0.939363	0.605347		4.25595	0.837372	0.588039		4.25595	1	0.578882		4.25595	0.845442	0.864963		4.25595	0.819833	0.570976		4.25595	0.799584	0.473469		4.25595	0.669958	0.249279
		4.36508	0.806964	0.727786		4.36508	0.784021	0.808159		4.36508	0.991174	0.795001		4.36508	0.932841	0.703975		4.36508	0.862477	0.606458		4.36508	0.855983	0.631886		4.36508	0.7965	0.505288		4.36508	0.968059	0.659316		4.36508	0.898251	0.881496		4.36508	0.877275	0.549525		4.36508	0.819425	0.449483		4.36508	0.589138	0.183811
		4.47421	0.684942	0.682431		4.47421	0.745285	0.810779		4.47421	0.954705	0.811625		4.47421	0.85577	0.571943		4.47421	0.914082	0.716302		4.47421	0.818501	0.539984		4.47421	0.834134	0.460141		4.47421	0.936262	0.734638		4.47421	0.827004	0.975227		4.47421	0.744892	0.528392		4.47421	0.92004	0.541316		4.47421	0.725944	0.236273
		4.58333	0.539473	0.644128		4.58333	0.610183	0.845133		4.58333	0.932461	0.850668		4.58333	0.786523	0.582211		4.58333	0.84745	0.721971		4.58333	0.765182	0.582226		4.58333	0.816689	0.54763		4.58333	0.907404	0.883637		4.58333	0.753475	0.767705		4.58333	0.834767	0.491884		4.58333	0.802137	0.482947		4.58333	0.696926	0.200875
		4.69246	0.409284	0.626891		4.69246	0.485119	0.830786		4.69246	0.876812	0.767494		4.69246	0.651461	0.60578		4.69246	0.909381	0.711749		4.69246	0.689113	0.577893		4.69246	0.711288	0.441589		4.69246	0.928764	1		4.69246	0.735099	0.72267		4.69246	0.761852	0.437773		4.69246	0.853734	0.400759		4.69246	0.715042	0.215514
		4.80159	0.378329	0.445065		4.80159	0.492554	0.870788		4.80159	0.825646	0.722667		4.80159	0.537118	0.515343		4.80159	0.842936	0.741696		4.80159	0.650938	0.565574		4.80159	0.736973	0.445922		4.80159	0.901083	0.883981		4.80159	0.711481	0.563477		4.80159	0.706517	0.424126		4.80159	0.835898	0.367951		4.80159	0.569039	0.206359
		4.91071	0.290169	0.438984		4.91071	0.464166	0.964681		4.91071	0.662154	0.669592		4.91071	0.488047	0.400599		4.91071	0.783179	0.579121		4.91071	0.656605	0.534771		4.91071	0.645838	0.492138		4.91071	0.79353	0.689846		4.91071	0.683897	0.57923		4.91071	0.729258	0.326028		4.91071	0.964583	0.501789		4.91071	0.6981	0.165453
		5.01984	0.29898	0.360624		5.01984	0.504448	0.948289		5.01984	0.571553	0.60282		5.01984	0.547371	0.426151		5.01984	0.772429	0.548615		5.01984	0.604406	0.455098		5.01984	0.633792	0.540683		5.01984	0.819612	0.620409		5.01984	0.738766	0.619319		5.01984	0.63108	0.416301		5.01984	0.939915	0.442218		5.01984	0.632634	0.149389
		5.12897	0.316262	0.368196		5.12897	0.628966	1		5.12897	0.475507	0.590576		5.12897	0.425059	0.41924		5.12897	0.621484	0.560929		5.12897	0.557336	0.433224		5.12897	0.667164	0.45441		5.12897	0.730793	0.595828		5.12897	0.741254	0.44094		5.12897	0.592625	0.354445		5.12897	0.884246	0.293702		5.12897	0.618194	0.0821555
		5.2381	0.300078	0.36266		5.2381	0.671629	0.953559		5.2381	0.408652	0.496095		5.2381	0.464522	0.24299		5.2381	0.646972	0.492506		5.2381	0.511465	0.421895		5.2381	0.625795	0.394585		5.2381	0.746296	0.546124		5.2381	0.647046	0.473883		5.2381	0.626935	0.305273		5.2381	0.832516	0.301499		5.2381	0.535606	0.0236193
		5.34722	0.232367	0.213963		5.34722	0.769367	0.887456		5.34722	0.419708	0.485074		5.34722	0.418755	0.251429		5.34722	0.656438	0.416785		5.34722	0.557289	0.310376		5.34722	0.653522	0.336002		5.34722	0.689035	0.489068		5.34722	0.600797	0.448883		5.34722	0.614398	0.248795		5.34722	0.852708	0.256722		5.34722	0.631685	0.0842697
		5.45635	0.229257	0.168774		5.45635	0.798204	0.970171		5.45635	0.440113	0.379821		5.45635	0.43489	0.28366		5.45635	0.586112	0.421392		5.45635	0.509753	0.265721		5.45635	0.538831	0.32515		5.45635	0.752812	0.504982		5.45635	0.563258	0.375444		5.45635	0.587533	0.188808		5.45635	0.96515	0.287511		5.45635	0.628211	0.0722831
		5.56548	0.31849	0.0802817		5.56548	0.770072	0.867433		5.56548	0.432194	0.286745		5.56548	0.372576	0.342734		5.56548	0.61214	0.510966		5.56548	0.564331	0.321105		5.56548	0.523935	0.38554		5.56548	0.640838	0.434791		5.56548	0.585687	0.347133		5.56548	0.524276	0.199524		5.56548	0.93319	0.380628		5.56548	0.528609	0.112651
		5.6746	0.248734	0.207721		5.6746	0.728136	0.836564		5.6746	0.377492	0.2511		5.6746	0.382642	0.280545		5.6746	0.576452	0.485017		5.6746	0.584258	0.162609		5.6746	0.439476	0.437131		5.6746	0.711998	0.388299		5.6746	0.594638	0.369758		5.6746	0.525688	0.182252		5.6746	0.899033	0.316574		5.6746	0.625491	0.115114
		5.78373	0.187962	0.133053		5.78373	0.65066	0.688695		5.78373	0.372744	0.299416		5.78373	0.404293	0.339273		5.78373	0.474347	0.460667		5.78373	0.492932	0.135048		5.78373	0.458608	0.421402		5.78373	0.668197	0.383301		5.78373	0.549701	0.236106		5.78373	0.510043	0.191524		5.78373	0.763732	0.191845		5.78373	0.562373	0.0680358
		5.89286	0.257123	0.0802401		5.89286	0.604535	0.660403		5.89286	0.429113	0.264938		5.89286	0.427882	0.266863		5.89286	0.487941	0.358289		5.89286	0.440123	0.0911046		5.89286	0.406023	0.401674		5.89286	0.629711	0.283641		5.89286	0.448967	0.248938		5.89286	0.512212	0.116436		5.89286	0.588411	0.207893		5.89286	0.704325	0.255796
		6.00198	0.212243	0.0151547		6.00198	0.582866	0.562183		6.00198	0.404065	0.235271		6.00198	0.423271	0.230877		6.00198	0.546016	0.416254		6.00198	0.427063	0.0747382		6.00198	0.358024	0.414776		6.00198	0.701168	0.215905		6.00198	0.427281	0.319654		6.00198	0.42944	0.165143		6.00198	0.742385	0.220187		6.00198	0.73161	0.202583
		6.11111	0.0914222	0.102744		6.11111	0.563826	0.413297		6.11111	0.409846	0.345489		6.11111	0.431351	0.302683		6.11111	0.513362	0.318511		6.11111	0.381384	0.047108		6.11111	0.315387	0.339414		6.11111	0.621545	0.206104		6.11111	0.465177	0.278704		6.11111	0.454156	0.129679		6.11111	0.765541	0.138251		6.11111	0.750112	0.265824
		6.22024	0.0874347	0.13753		6.22024	0.467216	0.251985		6.22024	0.372035	0.324423		6.22024	0.464656	0.399396		6.22024	0.386007	0.311712		6.22024	0.339686	0.0572925		6.22024	0.345071	0.379435		6.22024	0.536193	0.18934		6.22024	0.456635	0.244114		6.22024	0.415039	0		6.22024	0.594999	0.0663994		6.22024	0.685563	0.164816
		6.32937	0.126302	0.0534623		6.32937	0.419909	0.236848		6.32937	0.357767	0.213172		6.32937	0.509223	0.307482		6.32937	0.342766	0.237557		6.32937	0.333027	0.0571453		6.32937	0.279152	0.170328		6.32937	0.430319	0.187821		6.32937	0.418679	0.237928		6.32937	0.402771	0.0744955		6.32937	0.417614	0.121037		6.32937	0.763534	0.113458
		6.43849	0.0439833	0.0638805		6.43849	0.399457	0.258956		6.43849	0.322379	0.26933		6.43849	0.388334	0.147842		6.43849	0.320088	0.247778		6.43849	0.307483	0		6.43849	0.163003	0.199247		6.43849	0.305984	0.192292		6.43849	0.414624	0.222158		6.43849	0.304493	0.085626		6.43849	0.47169	0.168207		6.43849	0.599052	0.214867
		6.54762	0.028866	0.0197874		6.54762	0.320809	0.119395		6.54762	0.28408	0.284244		6.54762	0.238666	0.0965316		6.54762	0.265966	0.283993		6.54762	0.297843	0.049974		6.54762	0.158119	0.232669		6.54762	0.298475	0.104771		6.54762	0.313897	0.188749		6.54762	0.258753	0.115185		6.54762	0.47674	0.152631		6.54762	0.646893	0.0912304
		6.65675	0.00370812	0		6.65675	0.263794	0.0151377		6.65675	0.198819	0.286025		6.65675	0.118609	0.0448129		6.65675	0.179359	0.219374		6.65675	0.263181	0.132689		6.65675	0.156704	0.323342		6.65675	0.247436	0.0452086		6.65675	0.245129	0.196308		6.65675	0.257427	0.0521363		6.65675	0.361883	0.167437		6.65675	0.492007	0.000311463
		6.76587	0.0171577	0.0308029		6.76587	0.2191	0.00664249		6.76587	0.138058	0.304092		6.76587	0.0993937	0.0488779		6.76587	0.148105	0.307913		6.76587	0.229666	0.134042		6.76587	0.172484	0.349625		6.76587	0.222402	0.0586796		6.76587	0.1879	0.189348		6.76587	0.244088	0.0607251		6.76587	0.246634	0.132988		6.76587	0.518032	0.147421
		6.875	0	0.0710632		6.875	0.141431	0.00481242		6.875	0.130797	0.265377		6.875	0.0748007	0		6.875	0.18848	0.301427		6.875	0.265594	0.306913		6.875	0.178467	0.339569		6.875	0.178445	0		6.875	0.171819	0.147025		6.875	0.238159	0.125315		6.875	0.0971112	0.0976542		6.875	0.482488	0.0914617
		6.98413	0.0596255	0.0343552		6.98413	0.0973177	0.0568566		6.98413	0.162388	0.139565		6.98413	0.03485	0.0424369		6.98413	0.242447	0.29534		6.98413	0.247125	0.320949		6.98413	0.0961872	0.439371		6.98413	0.172993	0.0439004		6.98413	0.219496	0.328872		6.98413	0.136713	0.162994		6.98413	0.156178	0.0823679		6.98413	0.329059	0.0785171
		7.09325	0.0463587	0.0240097		7.09325	0.0695119	0		7.09325	0.108755	0.0518293		7.09325	0.0561451	0.0574417		7.09325	0.237891	0.359969		7.09325	0.264385	0.300216		7.09325	0.0714355	0.278025		7.09325	0.146889	0.0393034		7.09325	0.155076	0.364224		7.09325	0.133183	0.126592		7.09325	0.151179	0.0892894		7.09325	0.169797	0.0504193
		7.20238	0.0425108	0.0480922		7.20238	0	0.0728415		7.20238	0.0985316	0.0381371		7.20238	0	0.0681181		7.20238	0.179637	0.303233		7.20238	0.229646	0.290854		7.20238	0.0107379	0.165483		7.20238	0.0871508	0.0581612		7.20238	0.172766	0.372627		7.20238	0.108827	0.144271		7.20238	0	0		7.20238	0.1421	0.0974172
		7.31151	0.0216289	0.0599542		7.31151	0.0310369	0.138543		7.31151	0.0860086	0.0376584		7.31151	0.00836148	0.0681232		7.31151	0.299949	0.261004		7.31151	0.294697	0.368302		7.31151	0.0591329	0.203286		7.31151	0.185795	0.0889267		7.31151	0.0634702	0.41079		7.31151	0.159215	0.167027		7.31151	0.0778581	0.0717853		7.31151	0.135709	0.139295
		7.42063	0.0221771	0.0929955		7.42063	0.067983	0.0935936		7.42063	0.0843127	0		7.42063	0.0896318	0.197113		7.42063	0.385557	0.297787		7.42063	0.370561	0.396464		7.42063	0.128165	0.19507		7.42063	0.182466	0.170522		7.42063	0.176487	0.455116		7.42063	0.0952428	0.178295		7.42063	0.0155106	0.103577		7.42063	0.0582321	0.163141
		7.52976	0.0991824	0.243728		7.52976	0.11021	0.311322		7.52976	0.115275	0.050144		7.52976	0.121253	0.243589		7.52976	0.380451	0.28767		7.52976	0.493418	0.627384		7.52976	0.161121	0.367318		7.52976	0.245014	0.285889		7.52976	0.169004	0.545501		7.52976	0.00856485	0.296582		7.52976	0.0251606	0.241458		7.52976	0.0213278	0.305932
		7.63889	0.212794	0.314079		7.63889	0.202359	0.270518		7.63889	0.110433	0.0984801		7.63889	0.174818	0.253738		7.63889	0.509564	0.282064		7.63889	0.598519	0.698512		7.63889	0.217407	0.519721		7.63889	0.342463	0.389793		7.63889	0.166364	0.487849		7.63889	0.0759128	0.476779		7.63889	0.319055	0.335311		7.63889	0.0352587	0.278609
		7.74802	0.28614	0.555371		7.74802	0.232822	0.241474		7.74802	0.160874	0.0618146		7.74802	0.237111	0.196937		7.74802	0.655334	0.442906		7.74802	0.675175	0.900256		7.74802	0.30707	0.662889		7.74802	0.393495	0.428829		7.74802	0.214126	0.523941		7.74802	0.0748016	0.504636		7.74802	0.316635	0.34074		7.74802	0.0588835	0.164127
		7.85714	0.467277	0.73325		7.85714	0.271771	0.359017		7.85714	0.223937	0.204473		7.85714	0.256941	0.209499		7.85714	0.723157	0.50089		7.85714	0.683822	1		7.85714	0.292037	0.75883		7.85714	0.437328	0.543086		7.85714	0.205969	0.777534		7.85714	0.192721	0.533042		7.85714	0.361981	0.317415		7.85714	0.0748829	0.173513
		7.96627	0.427194	0.897718		7.96627	0.270109	0.413145		7.96627	0.225415	0.240165		7.96627	0.338293	0.199726		7.96627	0.7852	0.658695		7.96627	0.681644	0.941518		7.96627	0.319408	0.825918		7.96627	0.492205	0.736537		7.96627	0.331956	0.745807		7.96627	0.236498	0.574834		7.96627	0.340058	0.367969		7.96627	0	0.200568
		8.0754	0.489171	0.849834		8.0754	0.219093	0.338123		8.0754	0.199642	0.247919		8.0754	0.363346	0.312161		8.0754	0.852782	0.817095		8.0754	0.561783	0.792749						8.0754	0.674043	0.831677		8.0754	0.326597	0.697554		8.0754	0.349999	0.661921		8.0754	0.310626	0.381574		8.0754	0.00731116	0.226287
		8.18452	0.468436	0.755062		8.18452	0.235038	0.344698		8.18452	0.262352	0.248061		8.18452	0.426823	0.381684		8.18452	1	0.978223		8.18452	0.532145	0.627409						8.18452	0.663489	0.862361		8.18452	0.32862	0.965084		8.18452	0.485026	0.616905		8.18452	0.429531	0.354187		8.18452	0.0847826	0.304281
																		8.29365	0.991973	0.954126														8.29365	0.414219	0.986744		8.29365	0.452572	0.5425						8.29365	0.189624	0.27993
																																														8.40278	0.365738	0.372722
[truncated: 78 more columns]

## Sheet: exp1-endosomepooled
pooled data for individual min-max line profiles from previous 9 pages.
endosome 1																				endosome 2																								endosome 3
	t1				t2				t3				t4				t5				t1				t2				t3				t4				t5				t6				t1				t2
		Rab5	Snx1			Rab5	Snx1			Rab5	Snx1			Rab5	Snx1			Rab5	Snx1			Rab5	Snx1			Rab5	Snx1			Rab5	Snx1			Rab5	Snx1			Rab5	Snx1			Rab5	Snx1			Rab5	Snx1
	0	0.133627	0.237301		0	0.0875888	0.642904		0	0.00312745	0.264601		0	0.419435	0.3295		0	0.0269	0.0316155		0	0.747998	0.718645		0	1	0.539857		0	0.314142	0.158621		0	0.130442	0.117991		0	0.206945	0.138373		0	0.7689	0.623563		0	0.596167	0.429738		0
	0.10913	0.193251	0.37091		0.10913	0.12158	0.390906		0.10913	0	0.386123		0.10913	0.615638	0.324556		0.10913	0.115252	0.0788644		0.10913	0.564596	0.519527		0.10913	0.931353	0.463096		0.10913	0.294923	0.123341		0.10913	0.0812918	0.129716		0.10913	0.165641	0.055341		0.10913	0.735178	0.387385		0.10913	0.71488	0.365616		0.10913
	0.21825	0.195841	0.331631		0.21825	0.244265	0.377764		0.21825	0.015022	0.478626		0.21825	0.660233	0.325775		0.21825	0.123037	0.0601553		0.21825	0.515538	0.400963		0.21825	0.643445	0.521654		0.21825	0.280752	0.0679049		0.21825	0.0725549	0.0839752		0.21825	0.24155	0		0.21825	0.639628	0.195583		0.21825	0.678959	0.370732		0.21825
	0.32738	0.110953	0.332623		0.32738	0.323666	0.402238		0.32738	0.0548251	0.493248		0.32738	0.49773	0.277467		0.32738	0	0.152995		0.32738	0.576973	0.464115		0.32738	0.335253	0.565456		0.32738	0.31711	0.0579926		0.32738	0.0437472	0.0878769		0.32738	0.178645	0.102436		0.32738	0.60114	0.0854798		0.32738	0.687263	0.377738		0.32738
	0.43651	0.0183796	0.328786		0.43651	0.237041	0.503489		0.43651	0.149755	0.446872		0.43651	0.202613	0.216102		0.43651	0.102543	0.249429		0.43651	0.282757	0.425854		0.43651	0.224629	0.752913		0.43651	0.307519	0.0506395		0.43651	0.101896	0.0746267		0.43651	0.293812	0.131334		0.43651	0.446733	0.0317818		0.43651	0.562219	0.314292		0.43651
	0.54563	0	0.283846		0.54563	0.122983	0.590431		0.54563	0.238032	0.415098		0.54563	0.0515352	0.137938		0.54563	0.187387	0.287944		0.54563	0.364191	0.28572		0.54563	0.217163	1		0.54563	0.374113	0.02411		0.54563	0.0198087	0.0129817		0.54563	0.231782	0.154638		0.54563	0.464913	0		0.54563	0.520614	0.321253		0.54563
	0.65476	0.0744757	0.0959447		0.65476	0.0947974	0.743873		0.65476	0.256687	0.383846		0.65476	0.0959879	0.108846		0.65476	0.115001	0.439306		0.65476	0.371005	0.237926		0.65476	0.2633	0.966046		0.65476	0.4067	0.0286044		0.65476	0	0		0.65476	0.0984516	0.124752		0.65476	0.30839	0.020172		0.65476	0.630763	0.369882		0.65476
	0.76389	0.141039	0.170412		0.76389	0.235487	0.922369		0.76389	0.316892	0.299126		0.76389	0.124099	0.149352		0.76389	0.0693257	0.347008		0.76389	0.305675	0.155866		0.76389	0.273494	0.84447		0.76389	0.484422	0.021777		0.76389	0.0656891	0.0343214		0.76389	0.108557	0.115246		0.76389	0.300337	0.0303823		0.76389	0.566227	0.427028		0.76389
	0.87302	0.0952874	0.101363		0.87302	0.373928	0.869364		0.87302	0.305426	0.160502		0.87302	0.0205583	0.102698		0.87302	0.0889583	0.236318		0.87302	0.462672	0.0954893		0.87302	0.299228	0.640376		0.87302	0.522109	0		0.87302	0.110017	0.055089		0.87302	0.10943	0.0482068		0.87302	0.218654	0.0509407		0.87302	0.707464	0.431962		0.87302
	0.98214	0.197946	0.200819		0.98214	0.553915	0.720946		0.98214	0.259927	0.090191		0.98214	0	0.0643528		0.98214	0.0351545	0.135955		0.98214	0.564202	0.0240052		0.98214	0.340803	0.504611		0.98214	0.545598	0.046273		0.98214	0.0822688	0.113648		0.98214	0.00167234	0.0348938		0.98214	0.181258	0.0265179		0.98214	0.720464	0.638058		0.98214
	1.09127	0.224752	0.263784		1.09127	0.621071	0.52473		1.09127	0.277578	0.0767018		1.09127	0.0615764	0.0440606		1.09127	0.0595631	0.10593		1.09127	0.459037	0.0279372		1.09127	0.334052	0.352692		1.09127	0.476658	0.0536061		1.09127	0.0657137	0.187113		1.09127	0	0.0548694		1.09127	0.0852394	0.0578256		1.09127	0.846437	0.799861		1.09127
	1.2004	0.21788	0.306617		1.2004	0.660461	0.381817		1.2004	0.201132	0.00878615		1.2004	0.0808823	0.0551729		1.2004	0.235624	0.107716		1.2004	0.543113	0.0693287		1.2004	0.343902	0.247522		1.2004	0.362811	0.0676693		1.2004	0.132629	0.279		1.2004	0.0147688	0.0596899		1.2004	0.0536527	0.0671147		1.2004	0.817313	1		1.2004
	1.30952	0.432479	0.446889		1.30952	0.680078	0.424568		1.30952	0.127229	0.029692		1.30952	0.143246	0.0544099		1.30952	0.290019	0.0878476		1.30952	0.451625	0.0736297		1.30952	0.307557	0.224107		1.30952	0.131249	0.0834601		1.30952	0.148883	0.364709		1.30952	0.0244309	0.0739288		1.30952	0.12194	0.0975262		1.30952	1	0.96391		1.30952
	1.41865	0.62147	0.557731		1.41865	0.548946	0.480511		1.41865	0.0764599	0.0531564		1.41865	0.224626	0		1.41865	0.361138	0.0826828		1.41865	0.0900404	0		1.41865	0.232876	0.178313		1.41865	0.0214824	0.0884442		1.41865	0.186282	0.428032		1.41865	0.0864815	0.0929541		1.41865	0.0591041	0.109738		1.41865	0.905169	0.760308		1.41865
	1.52778	0.748367	0.633905		1.52778	0.536214	0.345242		1.52778	0.0635595	0.0145203		1.52778	0.307713	0.0507671		1.52778	0.3425	0.0540721		1.52778	0.222307	0.0351269		1.52778	0.14456	0.127576		1.52778	0.0314341	0.106234		1.52778	0.208459	0.527032		1.52778	0.0890428	0.151999		1.52778	0	0.134582		1.52778	0.702855	0.528704		1.52778
	1.6369	0.91077	0.680654		1.6369	0.667406	0.316477		1.6369	0.129217	0		1.6369	0.23132	0.109059		1.6369	0.327802	0.135836		1.6369	0.0890424	0.0115302		1.6369	0.0210428	0.1017		1.6369	0.0198495	0.173513		1.6369	0.262904	0.729389		1.6369	0.147994	0.188544		1.6369	0.032916	0.230266		1.6369	0.521916	0.332084		1.6369
	1.74603	0.70385	0.693898		1.74603	0.782045	0.534233		1.74603	0.217209	0.061732		1.74603	0.519765	0.152725		1.74603	0.373998	0.227176		1.74603	0	0.110651		1.74603	0.0102028	0.00307583		1.74603	0.0196728	0.224374		1.74603	0.331441	0.92375		1.74603	0.314732	0.253196		1.74603	0.0911251	0.267598		1.74603	0.478945	0.20519		1.74603
	1.85516	0.56081	0.606888		1.85516	0.874423	0.587472		1.85516	0.259613	0.0626707		1.85516	0.7709	0.221142		1.85516	0.310809	0.224673		1.85516	0.0788277	0.0935996		1.85516	0.0319782	0		1.85516	0.0395744	0.330179		1.85516	0.39653	0.981032		1.85516	0.272517	0.393414		1.85516	0.106688	0.30126		1.85516	0.302753	0.13899		1.85516
	1.96429	0.409855	0.588742		1.96429	0.949929	0.758487		1.96429	0.357839	0.103875		1.96429	0.728662	0.368985		1.96429	0.36957	0.272535		1.96429	0.209209	0.136694		1.96429	0.0139723	0.00708928		1.96429	0	0.434495		1.96429	0.493451	0.978304		1.96429	0.322397	0.486395		1.96429	0.190567	0.380571		1.96429	0.169236	0.0893377		1.96429
	2.07341	0.359201	0.517232		2.07341	1	0.689574		2.07341	0.476051	0.113003		2.07341	0.773317	0.389163		2.07341	0.335661	0.296156		2.07341	0.356434	0.236775		2.07341	0.0189627	0.142672		2.07341	0.0910886	0.56557		2.07341	0.629163	1		2.07341	0.45012	0.655252		2.07341	0.261774	0.466016		2.07341	0.122233	0.0633784		2.07341
	2.18254	0.304516	0.383365		2.18254	0.82755	0.580766		2.18254	0.512859	0.169803		2.18254	1	0.606703		2.18254	0.382959	0.272155		2.18254	0.735972	0.169685		2.18254	0.0497732	0.358915		2.18254	0.133642	0.63858		2.18254	0.680518	0.952469		2.18254	0.453998	0.824163		2.18254	0.340131	0.541732		2.18254	0.126552	0.0173324		2.18254
	2.29167	0.339992	0.422921		2.29167	0.718645	0.432757		2.29167	0.588622	0.21172		2.29167	0.905571	0.71664		2.29167	0.330179	0.224619		2.29167	0.797993	0.329095		2.29167	0	0.650164		2.29167	0.0546684	0.757296		2.29167	0.793394	0.853629		2.29167	0.463319	0.89266		2.29167	0.397042	0.647131		2.29167	0.137889	0.0324548		2.29167
	2.40079	0.258111	0.526161		2.40079	0.718618	0.34448		2.40079	0.591909	0.325008		2.40079	0.861949	0.939612		2.40079	0.350096	0.199929		2.40079	0.766493	0.226396		2.40079	0.0867618	0.705532		2.40079	0.0722974	0.820687		2.40079	0.960907	0.770617		2.40079	0.610638	1		2.40079	0.392646	0.679212		2.40079	0.111406	0.0779455		2.40079
	2.50992	0.265047	0.586402		2.50992	0.720584	0.239121		2.50992	0.806414	0.464474		2.50992	0.825935	0.961234		2.50992	0.331584	0.160357		2.50992	0.768704	0.292231		2.50992	0.139587	0.498382		2.50992	0.228906	0.786666		2.50992	1	0.766779		2.50992	0.670684	0.914534		2.50992	0.533463	0.612385		2.50992	0	0.137058		2.50992
	2.61905	0.338442	0.603367		2.61905	0.827587	0.167054		2.61905	0.897339	0.692717		2.61905	0.558579	1		2.61905	0.325954	0.144808		2.61905	1	0.445031		2.61905	0.252147	0.395702		2.61905	0.132562	0.702335		2.61905	0.953096	0.727392		2.61905	0.836343	0.811419		2.61905	0.555485	0.557954		2.61905	0.0434638	0.187768		2.61905
	2.72817	0.440177	0.709773		2.72817	0.844447	0.282444		2.72817	0.908139	0.926571		2.72817	0.320002	0.966438		2.72817	0.238563	0.0750914		2.72817	0.720243	0.457319		2.72817	0.285291	0.29556		2.72817	0.143125	0.702261		2.72817	0.713298	0.678731		2.72817	0.943531	0.728387		2.72817	0.588226	0.424711		2.72817	0.0373874	0.244586		2.72817
	2.8373	0.314132	0.714296		2.8373	0.869133	0.327529		2.8373	0.947355	1		2.8373	0.280619	0.791926		2.8373	0.236459	0.157842		2.8373	0.506592	0.363872		2.8373	0.247139	0.15063		2.8373	0.205895	0.583948		2.8373	0.625871	0.567166		2.8373	0.995518	0.664087		2.8373	0.714489	0.387512		2.8373	0.0823179	0.179175		2.8373
	2.94643	0.280146	0.689341		2.94643	0.773949	0.358888		2.94643	0.852271	0.936184		2.94643	0.292541	0.630509		2.94643	0.139931	0.10758		2.94643	0.484998	0.470769		2.94643	0.277548	0.0968516		2.94643	0.268183	0.5121		2.94643	0.498146	0.545316		2.94643	1	0.621272		2.94643	0.663621	0.341031		2.94643	0.0780909	0.124165		2.94643
	3.05556	0.368809	0.671501		3.05556	0.570737	0.366606		3.05556	0.706656	0.750833		3.05556	0.23709	0.581277		3.05556	0.106513	0.0396916		3.05556	0.540994	0.50842		3.05556	0.31972	0.14222		3.05556	0.332164	0.494521		3.05556	0.287159	0.473068		3.05556	0.956437	0.550756		3.05556	0.700132	0.32488		3.05556	0.127895	0.120239		3.05556
	3.16468	0.331254	0.680878		3.16468	0.372482	0.199755		3.16468	0.482413	0.549766		3.16468	0.183138	0.398054		3.16468	0.120076	0.0191485		3.16468	0.538456	0.640468		3.16468	0.421588	0.211744		3.16468	0.369638	0.469384		3.16468	0.14569	0.4538		3.16468	0.698591	0.361264		3.16468	0.815962	0.37532		3.16468	0.201859	0.0625117		3.16468
	3.27381	0.29004	0.552323		3.27381	0.220413	0.128055		3.27381	0.30543	0.406541		3.27381	0.13944	0.292461		3.27381	0.260033	0.0392692		3.27381	0.582875	0.553271		3.27381	0.457154	0.223858		3.27381	0.447682	0.545206		3.27381	0.0710155	0.404689		3.27381	0.562713	0.267191		3.27381	0.988683	0.499435		3.27381	0.27258	0.0464863		3.27381
	3.38294	0.214329	0.541355		3.38294	0.17634	0.0258883		3.38294	0.230655	0.252357		3.38294	0.201908	0.234602		3.38294	0.0839051	0.0722142		3.38294	0.4607	0.612669		3.38294	0.549546	0.256938		3.38294	0.519879	0.635129		3.38294	0.0491049	0.29486		3.38294	0.459877	0.17466		3.38294	0.978293	0.636267		3.38294	0.406766	0.0449886		3.38294
	3.49206	0.38392	0.579384		3.49206	0.111931	0.0209186		3.49206	0.2096	0.206961		3.49206	0.395677	0.226732		3.49206	0.114783	0.171341		3.49206	0.864505	0.709895		3.49206	0.749371	0.281959		3.49206	0.702057	0.804976		3.49206	0.00948755	0.309346		3.49206	0.318385	0.220387		3.49206	1	0.786572		3.49206	0.395324	0		3.49206
	3.60119	0.368978	0.685669		3.60119	0.0838214	0		3.60119	0.15742	0.200908		3.60119	0.278836	0.273265		3.60119	0.249368	0.415687		3.60119	0.55732	0.641221		3.60119	0.861574	0.238428		3.60119	0.892709	0.947385		3.60119	0.0322967	0.254284		3.60119	0.275669	0.184349		3.60119	0.976658	0.961975		3.60119	0.438396	0.024114		3.60119
	3.71032	0.422221	0.84094		3.71032	0.0699366	0.0287747		3.71032	0.10823	0.275016		3.71032	0.214246	0.3246		3.71032	0.381269	0.599178		3.71032	0.492724	0.699349		3.71032	0.871075	0.194869		3.71032	1	1		3.71032	0.0940262	0.197677		3.71032	0.177616	0.176553		3.71032	0.924971	1		3.71032	0.41517	0.00521656		3.71032
	3.81944	0.531726	0.984821		3.81944	0.118976	0.141914		3.81944	0.191747	0.455509		3.81944	0.338542	0.324033		3.81944	0.653726	0.848629		3.81944	0.527773	0.82811		3.81944	0.900216	0.178753		3.81944	0.926155	0.958011		3.81944	0.130713	0.186762		3.81944	0.230316	0.222568		3.81944	0.972322	0.868142		3.81944	0.539995	0.0271962		3.81944
	3.92857	0.548736	0.990798		3.92857	0.132039	0.220958		3.92857	0.452961	0.681823		3.92857	0.551612	0.341331		3.92857	0.765969	0.860396		3.92857	0.708895	0.874059		3.92857	0.825044	0.191047		3.92857	0.685339	0.80941						3.92857	0.196421	0.179766		3.92857	0.914198	0.777563		3.92857	0.484729	0.0534136		3.92857
	4.0377	0.692628	0.766206		4.0377	0.206835	0.278728		4.0377	0.788206	0.876889		4.0377	0.542074	0.326751		4.0377	1	0.843266		4.0377	0.942828	0.875245		4.0377	0.810106	0.276368		4.0377	0.508728	0.554143						4.0377	0.25241	0.105913		4.0377	0.881503	0.677173		4.0377	0.489808	0.0761056		4.0377
	4.14683	0.716003	0.835707		4.14683	0.187934	0.33546		4.14683	0.939416	0.90806		4.14683	0.714579	0.321679		4.14683	0.843975	0.771653		4.14683	0.82844	0.7804		4.14683	0.808495	0.342192		4.14683	0.419808	0.357807														4.14683	0.45064	0.130983		4.14683
	4.25595	0.705839	0.637393		4.25595	0.254707	0.450003		4.25595	1	0.909081		4.25595	0.725173	0.307632		4.25595	0.698218	0.747215		4.25595	0.78142	0.690408		4.25595	0.774001	0.367619		4.25595	0.38041	0.258183														4.25595	0.550613	0.154646		4.25595
	4.36508	0.677333	0.570275		4.36508	0.252665	0.456692		4.36508	0.823965	0.873483		4.36508	0.660769	0.274058		4.36508	0.639783	0.771568		4.36508	0.86355	0.665094		4.36508	0.978105	0.549379		4.36508	0.324386	0.183499														4.36508	0.560051	0.241821		4.36508
	4.47421	0.60237	0.54119		4.47421	0.306853	0.404438		4.47421	0.778889	0.806582		4.47421	0.582157	0.379059		4.47421	0.675595	0.800213		4.47421	0.622847	0.738797		4.47421	0.9356	0.520493																		4.47421	0.527464	0.307393		4.47421
	4.58333	0.502669	0.61394		4.58333	0.328813	0.274626		4.58333	0.731795	0.606068		4.58333	0.439238	0.39729		4.58333	0.475155	0.853315		4.58333	0.846109	0.814395		4.58333	0.956587	0.569678																		4.58333	0.567544	0.362234		4.58333
	4.69246	0.510899	0.63372		4.69246	0.404927	0.210501		4.69246	0.676161	0.435894		4.69246	0.464402	0.474416		4.69246	0.588256	0.829121		4.69246	0.917075	0.867553
	4.80159	0.538201	0.704564		4.80159	0.419662	0.234828		4.80159	0.502612	0.266568		4.80159	0.431976	0.498024		4.80159	0.481828	0.757029		4.80159	0.884041	1
	4.91071	0.509252	0.646419		4.91071	0.377023	0.182416		4.91071	0.430283	0.194176		4.91071	0.236746	0.534141		4.91071	0.500632	0.73686		4.91071	0.652148	0.829395
	5.01984	0.500364	0.729651		5.01984	0.278759	0.258502		5.01984	0.328406	0.125107		5.01984	0.137804	0.739513		5.01984	0.343731	0.734252
	5.12897	0.490046	0.715575		5.12897	0.219362	0.322579		5.12897	0.229246	0.0909178		5.12897	0.206983	0.795157		5.12897	0.330623	1
	5.2381	0.480127	0.710113		5.2381	0.182478	0.415534		5.2381	0.163848	0.0299864		5.2381	0.200743	0.887646		5.2381	0.283827	0.838776
	5.34722	0.635639	0.845453		5.34722	0.21436	0.541739		5.34722	0.120396	0.00679085		5.34722	0.288423	0.811505		5.34722	0.21113	0.747416
	5.45635	0.716551	0.838508		5.45635	0.186078	0.559555		5.45635	0.137959	0.0253956		5.45635	0.132789	0.852499		5.45635	0.197442	0.444287
	5.56548	0.957386	0.903841		5.56548	0.219301	0.437973		5.56548	0.0820388	0.0206399		5.56548	0.216308	0.793517		5.56548	0.316978	0.267083
	5.6746	1	1		5.6746	0.328778	0.422996		5.6746	0.0829628	0.026485		5.6746	0.425697	0.585256		5.6746	0.241764	0.209944
	5.78373	0.817314	0.987209		5.78373	0.355448	0.335913		5.78373	0.0700179	0.0555541		5.78373	0.3415	0.504713		5.78373	0.290267	0.194895
	5.89286	0.502286	0.825654		5.89286	0.283092	0.303813		5.89286	0.0873066	0.054432		5.89286	0.286421	0.437132		5.89286	0.330412	0.157879
	6.00198	0.423445	0.706013		6.00198	0.14502	0.256518		6.00198	0.0983942	0.0880066		6.00198	0.374906	0.363842		6.00198	0.271518	0.072064
	6.11111	0.19968	0.511113		6.11111	0.0866407	0.369191		6.11111	0.0630683	0.129911		6.11111	0.31363	0.35501		6.11111	0.278534	0.133914
	6.22024	0.27038	0.397664		6.22024	0.0747203	0.297453		6.22024	0.0471456	0.11035		6.22024	0.376349	0.349815		6.22024	0.259533	0.0286391
	6.32937	0.231936	0.321461		6.32937	0.116854	0.394424		6.32937	0.0578403	0.0958555		6.32937	0.25662	0.346804		6.32937	0.183121	0.0761261
	6.43849	0.284714	0.230959		6.43849	0	0.361451		6.43849	0.0654519	0.0534479		6.43849	0.332323	0.301068		6.43849	0.142895	0.0852907
	6.54762	0.323976	0.147061		6.54762	0.0843732	0.273555		6.54762	0.11779	0.0288202		6.54762	0.11088	0.324679		6.54762	0.096052	0
	6.65675	0.273071	0.0923505		6.65675	0.0847112	0.349741		6.65675	0.0733044	0.012983		6.65675	0.333696	0.35763		6.65675	0.0270331	0.0391842
	6.76587	0.233459	0		6.76587	0.100187	0.31484		6.76587	0.129042	0.00983287		6.76587	0.00960918	0.33147
	6.875	0.175592	0.12626		6.875	0.0267727	0.513871		6.875	0.073964	0.0330668		6.875	0.240645	0.248307
	6.98413	0.144327	0.149926		6.98413	0.0601439	0.754859		6.98413	0.0431644	0.0409726		6.98413	0.338668	0.270696
	7.09325	0.177908	0.13286		7.09325	0.10752	0.944153		7.09325	0.0156677	0.0970302
	7.20238	0.126398	0.175869		7.20238	0.0669463	1
					7.31151	0.0553388	0.821298
[truncated: 317 more columns]

[truncated: 8 more sheets: exp1-endosomepooled(2), exp2-endosome1, exp2-endosome2, exp2-endosome3, exp2-endosome4, exp2-endosome5, exp2-endosomepooled, exp2-endosomepooled (2)]
