# Supplementary material for: A novel live-cell imaging assay reveals regulation of endosome maturation
Source: eLife. 2021 Nov 30;10:e70982. doi: 10.7554/eLife.70982 (PMC8635980; doi:10.7554/eLife.70982)
Supplement: Figure 7—source data 1. [file elife-70982-fig7-data1.xlsx]

## Sheet: exp1-endosome1
endosome 1							dMFI					%dMFI
	frame #	Rab7(rim)	Rab7(background)	Snx1(rim)	Snx1(background)		frame #	Rab7	Snx1			frame #	Rab7	Snx1
	1	437.426	506.438	693.537	713.167		1	-69.012	-19.63			1	0.0888048	0.486747
	2	450.051	516.625	689.993	739.318		2	-66.574	-49.325			2	0.0959863	0.111417
	3	466.478	544.229	721.434	762.651		3	-77.751	-41.217			3	0.063063	0.213898
	4	481.463	556.682	746.765	791.182		4	-75.219	-44.417			4	0.0705213	0.173452
	5	486.833	545.475	707	744.32		5	-58.642	-37.32			5	0.119351	0.263155
	6	473.896	520.375	658.375	698.36		6	-46.479	-39.985			6	0.155179	0.22947
	7	471.684	530.074	666.934	713.172		7	-58.39	-46.238			7	0.120093	0.150435
	8	464.658	521.76	621.664	665.583		8	-57.102	-43.919			8	0.123887	0.179746
	9	479.625	543.819	657.895	674.373		9	-64.194	-16.478			9	0.102997	0.526587
	10	457.796	556.956	668.888	707.216		10	-99.16	-38.328			10	0	0.250414
	11	521.455	547.335	649.744	672.882		11	-25.88	-23.138			11	0.215856	0.442408
	12	483.829	524.794	634	677.539		12	-40.965	-43.539			12	0.171421	0.184549
	13	497.046	519.064	642.638	694.015		13	-22.018	-51.377			13	0.227232	0.085481
	14	488.769	514.736	645.679	695.514		14	-25.967	-49.835			14	0.215599	0.104971
	15	505.564	518.67	615.596	662.509		15	-13.106	-46.913			15	0.253483	0.141904
	16	534.641	546.16	618.795	661.198		16	-11.519	-42.403			16	0.258158	0.198908
	17	531.987	553.33	631.397	667.259		17	-21.343	-35.862			17	0.22922	0.281583
	18	555.224	534.816	632.769	668.042		18	20.408	-35.273			18	0.352203	0.289028
	19	539.678	543.946	616.625	674.765		19	-4.268	-58.14			19	0.279517	0
	20	550.382	550.637	621.171	654.211		20	-0.255	-33.04			20	0.291337	0.317252
	21	602.827	553.212	650.731	667.741		21	49.615	-17.01			21	0.438236	0.519863
	22	586.731	529.915	618.276	649.311		22	56.816	-31.035			22	0.459448	0.342594
	23	631.603	572.396	605.192	633.179		23	59.207	-27.987			23	0.466491	0.381119
	24	621.75	586.707	601.763	636.803		24	35.043	-35.04			24	0.395312	0.291973
	25	618.934	589.399	589.211	620.663		25	29.535	-31.452			25	0.379088	0.337323
	26	582.941	553.863	644.283	676.206		26	29.078	-31.923			26	0.377742	0.33137
	27	629.169	567.835	673.527	706.735		27	61.334	-33.208			27	0.472756	0.315128
	28	652.533	606.875	662.546	681.731		28	45.658	-19.185			28	0.42658	0.492372
	29	718.375	603.25	707.776	686.799		29	115.125	20.977			29	0.631204	1
	30	718.507	610.779	635.671	651.275		30	107.728	-15.604			30	0.609415	0.537634
	31	745.533	650.931	663.02	675.529		31	94.602	-12.509			31	0.570751	0.576753
	32	780.439	657.46	637.135	657.31		32	122.979	-20.175			32	0.654339	0.479859
	33	763.405	637.67	639.155	637.05		33	125.735	2.105			33	0.662457	0.761467
	34	750.716	648.04	607.5	639.36		34	102.676	-31.86			34	0.594534	0.332166
	35	805.796	635.711	605.882	641.132		35	170.085	-35.25			35	0.793096	0.289318
	36	832.926	671.46	590.264	616.825		36	161.466	-26.561			36	0.767708	0.399143
	37	798.103	649.236	619.276	650.967		37	148.867	-31.691			37	0.730596	0.334302
	38	725.211	642.848	609.349	639.51		38	82.363	-30.161			38	0.5347	0.353641
	39	708.257	598.817	572.697	607.495		39	109.44	-34.798			39	0.614458	0.295031
	40	706.329	581.716	578.046	597.942		40	124.613	-19.896			40	0.659152	0.483385
	41	718.75	571.269	585.658	602.264		41	147.481	-16.606			41	0.726513	0.524969
	42	724.684	569.706	577.066	611.667		42	154.978	-34.601			42	0.748596	0.297521
	43	764.007	609.132	574.974	599.358		43	154.875	-24.384			43	0.748293	0.426659
	44	775.342	613.794	562.421	581.637		44	161.548	-19.216			44	0.767949	0.49198
	45	752.901	569.428	563.224	593.918		45	183.473	-30.694			45	0.832532	0.346904
	46	771.737	590.873	556.862	578.819		46	180.864	-21.957			46	0.824847	0.457335
	47	803.326	647.09	557.431	581.59		47	156.236	-24.159			47	0.752302	0.429503
	48	749.299	620.21	556.875	557.845		48	129.089	-0.97			48	0.672337	0.722601
	49	764.59	619.895	556.972	560.675		49	144.695	-3.703			49	0.718306	0.688057
	50	807.092	606.76	563.099	549.431		50	200.332	13.668			50	0.882192	0.907618
	51	771.597	583.53	568.319	562.15		51	188.067	6.169			51	0.846064	0.812834
	52	812.014	588.23	536.271	547.795		52	223.784	-11.524			52	0.951273	0.589203
	53	808.854	590.945	529.229	540.905		53	217.909	-11.676			53	0.933968	0.587282
	54	830.056	596.115	515.924	532.005		54	233.941	-16.081			54	0.981192	0.531605
	55	826.326	586	539.319	547.895		55	240.326	-8.576			55	1	0.626465
	56	835.188	599.365	527.861	531.835		56	235.823	-3.974			56	0.986736	0.684632
	57	806.528	605.505	538.771	550.025		57	201.023	-11.254			57	0.884228	0.592616
	58	815.264	591.55	498.639	500.125		58	223.714	-1.486			58	0.951067	0.716079
	59	778.993	587.622	498.957	507.73		59	191.371	-8.773			59	0.855797	0.623975
	60	761.993	584.311	502.679	513.776		60	177.682	-11.097			60	0.815474	0.5946
	61	750.833	596.832	487.121	518.239		61	154.001	-31.118			61	0.745719	0.341545
	62	781.75	601.484	502.949	519.344		62	180.266	-16.395			62	0.823085	0.527636
	63	762.758	622.638	495.394	521.17		63	140.12	-25.776			63	0.70483	0.409065
	64	760.979	602.816	500.1	514.056		64	158.163	-13.956			64	0.757978	0.558464
	65	702.25	593.771	505.235	519.601		65	108.479	-14.366			65	0.611628	0.553282
	66	733.545	625.989	517.523	524.037		66	107.556	-6.514			66	0.608909	0.652527
	67	755.402	615.181	507.167	517.697		67	140.221	-10.53			67	0.705128	0.601767
	68	753.015	634.761	493.098	512.681		68	118.254	-19.583			68	0.640421	0.487342
	69	780.977	648.41	494.917	520.016		69	132.567	-25.099			69	0.682582	0.417622
	70	780.985	650.846	489.394	507.612		70	130.139	-18.218			70	0.67543	0.504594
	71	782.125	666.844	485.022	499.01		71	115.281	-13.988			71	0.631664	0.55806
	72	766.538	686.462	477.167	502.56		72	80.076	-25.393			72	0.527963	0.413906
	73	812.295	714.38	477.72	490.082		73	97.915	-12.362			73	0.58051	0.578611
	74	831.47	713.685	488.508	512.098		74	117.785	-23.59			74	0.63904	0.436695
	75	841.197	723.154	491.144	504.612		75	118.043	-13.468			75	0.6398	0.564632
	76	813.106	705.202	457.318	473.383		76	107.904	-16.065			76	0.609934	0.531807
	77	789.371	710.729	449.864	466.883		77	78.642	-17.019			77	0.523739	0.519749
	78	785.902	729.287	460.318	479.548		78	56.615	-19.23			78	0.458855	0.491803
	79	745.682	668.223	441.644	457.957		79	77.459	-16.313			79	0.520254	0.528673
	80	715.652	634.761	442	449.362		80	80.891	-7.362			80	0.530364	0.641809
	81	678.538	618.908	441.652	468.207		81	59.63	-26.555			81	0.467737	0.399219
	82	645.318	613.386	429.197	455.674		82	31.932	-26.477			82	0.386148	0.400205
	83	639.22	606.005	430.205	457.543		83	33.215	-27.338			83	0.389928	0.389322
	84	634.189	591.848	444.288	469.418		84	42.341	-25.13			84	0.41681	0.41723
	85	636.414	596.5	432.977	458.917		85	39.914	-25.94			85	0.40966	0.406992
	86	637.773	587.1	439.688	464.678		86	50.673	-24.99			86	0.441353	0.419
	87	614.266	562.272	435.547	463.833		87	51.994	-28.286			87	0.445244	0.37734
	88	606.089	555.318	438.726	466.568		88	50.771	-27.842			88	0.441641	0.382952
	89	627.289	559.667	437.984	468.072		89	67.622	-30.088			89	0.491278	0.354563
	90	636.297	567.667	426.906	444.5		90	68.63	-17.594			90	0.494247	0.512482
	91	609.547	543.478	420.633	445.022		91	66.069	-24.389			91	0.486703	0.426596
	92	586.383	558.023	406.067	441.051		92	28.36	-34.984			92	0.375627	0.29268
	93	590.681	561.86	399.112	433.826		93	28.821	-34.714			93	0.376985	0.296093
	94	619.645	533.039	408.71	439.283		94	86.606	-30.573			94	0.547198	0.348433
	95	608.202	527.378	401.645	429.178		95	80.824	-27.533			95	0.530166	0.386857
	96	619.016	528.717	407.629	429.883		96	90.299	-22.254			96	0.558076	0.453581
	97	606.777	519.196	404.054	428.217		97	87.581	-24.163			97	0.55007	0.429453
	98	588.866	518.749	410.299	443.322		98	70.117	-33.023			98	0.498627	0.317467
	99	599.441	484.76	413.205	415.41		99	114.681	-2.205			99	0.629896	0.706991
	100	589.492	494.516	403.992	412.947		100	94.976	-8.955			100	0.571853	0.621674
	101	605.008	522.739	390.629	402.5		101	82.269	-11.871			101	0.534423	0.584817
	102	630.218	529.261	411.242	416.428		102	100.957	-5.186			102	0.589471	0.669313
	103	663.161	580.55	419.823	426.044		103	82.611	-6.221			103	0.53543	0.656231
	104	640.738	518.3	413.041	412.728		104	122.438	0.313			104	0.652746	0.738817
	105	642.098	528.42	396.593	405.978		105	113.678	-9.385			105	0.626942	0.616239
	106	642.451	510.862	389.135	387.73		106	131.589	1.405			106	0.679701	0.75262
	107	648.705	516.234	396.519	398.435		107	132.471	-1.916			107	0.682299	0.710644
	108	646.322	524.162	382.86	384.793		108	122.16	-1.933			108	0.651927	0.710429
	109	669.455	521.268	372.306	379.81		109	148.187	-7.504			109	0.728593	0.640014
	110	701.165	534.966	381.62	392.385		110	166.199	-10.765			110	0.781649	0.598797
	111	722.098	539.532	388.924	389.186		111	182.566	-0.262			111	0.82986	0.731549
	112	746.698	537.544	380.73	389.346		112	209.154	-8.616			112	0.908179	0.625959
	113	753.874	517.772	374.993	383.544		113	236.102	-8.551			113	0.987558	0.626781
	114	729.377	517.892	350.254	381.097		114	211.485	-30.843			114	0.915045	0.345021
	115	695.567	511.054	347.386	365.651		115	184.513	-18.265			115	0.835596	0.504
	116	700.919	498.161	349.067	369.755		116	202.758	-20.688			116	0.889339	0.473375
	117	695.305	498.364	354.758	370.62		117	196.941	-15.862			117	0.872204	0.534373
	118	662.083	470.337	366.361	379.282		118	191.746	-12.921			118	0.856901	0.571546
	119	658.341	482.549	358.422	377.021		119	175.792	-18.599			119	0.809907	0.499779
	120	680.163	490.465	376.705	384.957		120	189.698	-8.252			120	0.850869	0.63056
	121	627.268	504.133	352.661	367.26		121	123.135	-14.599			121	0.654799	0.550337
	122	685.993	482.639	357.797	365.418		122	203.354	-7.621			122	0.891094	0.638535
	123	649.077	524.023	342.838	375.903		123	125.054	-33.065			123	0.660451	0.316936
	124	717.59	565.269	341.342	370.394		124	152.321	-29.052			124	0.74077	0.367658
	125	668.285	493.196	345.325	361.793		125	175.089	-16.468			125	0.807836	0.526714
	126	645.654	490.774	329.575	353.392		126	154.88	-23.817			126	0.748308	0.433826
	127	646.197	523.434	349.614	359.379		127	122.763	-9.765			127	0.653703	0.611436
	128	580.713	467.276	350.86	371.443		128	113.437	-20.583			128	0.626232	0.474702
	129	628.331	489.753	334.661	355.11		129	138.578	-20.449			129	0.700288	0.476396
	130	647.937	465.165	341.386	354.352		130	182.772	-12.966			130	0.830467	0.570977
	131	640.702	463.929	343.637	358.918		131	176.773	-15.281			131	0.812796	0.541717
	132	649.45	494.701	336.558	364.571		132	154.749	-28.013			132	0.747922	0.38079
	133	638.134	538.437	326.839	357.766		133	99.697	-30.927			133	0.585759	0.343959
	134	677.181	513.902	352.75	370.293		134	163.279	-17.543			134	0.773048	0.513126
	135	656.188	530.353	341.777	365.269		135	125.835	-23.492			135	0.662752	0.437934
	136	600.952	498.405	322.905	352.423		136	102.547	-29.518			136	0.594154	0.361768
	137	586.324	487.822	322.257	347.767		137	98.502	-25.51			137	0.582239	0.412427
	138	587.39	503.632	318.705	344.276		138	83.758	-25.571			138	0.538809	0.411656
	139	627.89	537.375	321.31	338.401		139	90.515	-17.091			139	0.558712	0.518839
	140	662.267	515.93	323.604	348.414		140	146.337	-24.81			140	0.723143	0.421275
	141	656.576	551.161	313.727	340.503		141	105.415	-26.776			141	0.602602	0.396426
	142	619.244	554.486	305.5	339.336		142	64.758	-33.836			142	0.482842	0.307191
	143	712.904	577.853	312.596	343.027		143	135.051	-30.431			143	0.689899	0.350228
	144	691.18	563.956	318.67	340.734		144	127.224	-22.064			144	0.666843	0.455983

## Sheet: exp1-endosome2
endosome 2							dMFI					%dMFI
	frame #	Rab7(rim)	Rab7(background)	Snx1(rim)	Snx1(background)		frame #	Rab7	Snx1			frame #	Rab7	Snx1
	1	482.428	543.255	783.513	814.74		1	-60.827	-31.227			1	0.0628946	0.0559183
	2	472.763	543.165	820.071	849.123		2	-70.402	-29.052			2	0.0321771	0.0871275
	3	476.409	556.841	810.226	828.505		3	-80.432	-18.279			3	0	0.24171
	4	484.955	537.316	783.487	807.443		4	-52.361	-23.956			4	0.0900543	0.16025
	5	520.44	553.701	757.464	767.571		5	-33.261	-10.107			5	0.151329	0.35897
	6	494.353	551.873	739.647	768.599		6	-57.52	-28.952			6	0.0735037	0.0885624
	7	512.1	560.435	752.294	776.019		7	-48.335	-23.725			7	0.10297	0.163565
	8	520.587	540.536	759.605	739.638		8	-19.949	19.967			8	0.194035	0.790504
	9	539.407	555.375	718.529	723.174		9	-15.968	-4.645			9	0.206806	0.437345
	10	585.442	571.714	742.57	756.656		10	13.728	-14.086			10	0.302074	0.301875
	11	605.125	581.836	766.852	745.444		11	23.289	21.408			11	0.332746	0.811181
	12	582.159	564.39	756.08	721.513		12	17.769	34.567			12	0.315038	1
	13	597.58	571.031	751.699	734.601		13	26.549	17.098			13	0.343205	0.749336
	14	530.756	538.75	726.835	728.912		14	-7.994	-2.077			14	0.232388	0.474193
	15	546.835	543.61	715.483	729.496		15	3.225	-14.013			15	0.268379	0.302923
	16	528.71	539.202	783.062	748.561		16	-10.492	34.501			16	0.224374	0.999053
	17	536.341	535.452	746.994	751.952		17	0.889	-4.958			17	0.260885	0.432854
	18	558.733	554.399	817.847	826.43		18	4.334	-8.583			18	0.271937	0.380838
	19	576.042	573.67	748.095	781.638		19	2.372	-33.543			19	0.265643	0.0226859
	20	601.965	599.531	773.326	757.134		20	2.434	16.192			20	0.265842	0.736336
	21	585.869	568.211	743.364	749.197		21	17.658	-5.833			21	0.314682	0.420298
	22	595.057	560.697	717.5	734.281		22	34.36	-16.781			22	0.368263	0.263205
	23	584.919	559.241	713.657	723.679		23	25.678	-10.022			23	0.34041	0.36019
	24	581.738	575.237	666.901	688.674		24	6.501	-21.773			24	0.278889	0.191574
	25	600.093	562.754	640.169	651.638		25	37.339	-11.469			25	0.37782	0.339427
	26	597.366	556.54	618.052	639.844		26	40.826	-21.792			26	0.389007	0.191302
	27	611.291	582.518	609.483	612.804		27	28.773	-3.321			27	0.350339	0.456343
	28	664.843	615.897	604.977	628.902		28	48.946	-23.925			28	0.415056	0.160695
	29	697.805	633.286	636.841	665.273		29	64.519	-28.432			29	0.465016	0.0960239
	30	708.89	590.636	643.043	644.05		30	118.254	-1.007			30	0.637402	0.489547
	31	732.89	595.05	654.238	650.491		31	137.84	3.747			31	0.700236	0.557762
	32	692.549	587.841	636.482	643.191		32	104.708	-6.709			32	0.593946	0.407728
	33	689.707	576.555	644.628	622.905		33	113.152	21.723			33	0.621035	0.815701
	34	694.299	585.75	609.311	609.777		34	108.549	-0.466			34	0.606268	0.49731
	35	666.421	559.423	626.841	617.782		35	106.998	9.059			35	0.601292	0.633984
	36	690.904	560.797	603.545	616.613		36	130.107	-13.068			36	0.675428	0.316483
	37	721.769	575.797	587.949	599.835		37	145.972	-11.886			37	0.726324	0.333443
	38	716.34	554.698	618.385	617.028		38	161.642	1.357			38	0.776595	0.523468
	39	735.692	547.226	610.853	616.505		39	188.466	-5.652			39	0.862649	0.422895
	40	767.282	574.665	591.987	595.868		40	192.617	-3.881			40	0.875966	0.448308
	41	790.936	576.774	567.205	589.193		41	214.162	-21.988			41	0.945084	0.188489
	42	791.875	569.455	581.577	574.076		42	222.42	7.501			42	0.971576	0.611628
	43	740.554	561.134	540.655	555.254		43	179.42	-14.599			43	0.833628	0.294514
	44	780.14	576.155	539.055	542.409		44	203.985	-3.354			44	0.912435	0.455869
	45	784.558	603.627	533.551	568.675		45	180.931	-35.124			45	0.838476	0
	46	802.433	578.005	527.616	538.823		46	224.428	-11.207			46	0.978018	0.343186
	47	841.115	613.693	516.891	532.858		47	227.422	-15.967			47	0.987623	0.274885
	48	808.481	605.552	489.218	510.481		48	202.929	-21.263			48	0.909047	0.198892
	49	843.762	623.909	502.628	513.391		49	219.853	-10.763			49	0.963341	0.349557
	50	797.062	610.296	486.413	498.815		50	186.766	-12.402			50	0.857195	0.326039
	51	786.044	618.431	501.956	515.699		51	167.613	-13.743			51	0.795751	0.306797
	52	792.462	587.657	499.188	503.977		52	204.805	-4.789			52	0.915066	0.435279
	53	790.064	598.925	503.955	507.387		53	191.139	-3.432			53	0.871224	0.45475
	54	773.062	622.315	505.488	502.676		54	150.747	2.812			54	0.741643	0.544346
	55	755.888	600.25	510.681	518.56		55	155.638	-7.879			55	0.757334	0.39094
	56	813.205	618.283	510.577	497.854		56	194.922	12.723			56	0.88336	0.686559
	57	757.449	594.5	504.071	502.368		57	162.949	1.703			57	0.780788	0.528433
	58	728.25	566.471	473.704	472.49		58	161.779	1.214			58	0.777035	0.521416
	59	741.934	595.451	459.487	469.887		59	146.483	-10.4			59	0.727964	0.354766
	60	770.763	611.456	465.178	471.696		60	159.307	-6.518			60	0.769104	0.410469
	61	774.25	618.603	452.914	465.265		61	155.647	-12.351			61	0.757363	0.326771
	62	787.671	606.745	447.296	455.613		62	180.926	-8.317			62	0.83846	0.384655
	63	738.086	604.819	448.875	460.907		63	133.267	-12.032			63	0.685566	0.331348
	64	732.809	586.544	465.118	477.48		64	146.265	-12.362			64	0.727264	0.326613
	65	741.533	570.912	453.5	474.191		65	170.621	-20.691			65	0.8054	0.2071
	66	733.849	600.485	454.816	472.426		66	133.364	-17.61			66	0.685877	0.251309
	67	741.785	618.31	442.465	456.64		67	123.475	-14.175			67	0.654152	0.300598
	68	757.788	594.588	439.224	457.223		68	163.2	-17.999			68	0.781593	0.245728
	69	774.59	622.69	442.257	458.805		69	151.9	-16.548			69	0.745342	0.266548
	70	803.319	666.97	446.277	468.65		70	136.349	-22.373			70	0.695453	0.182965
	71	835.338	714.307	451.165	475.332		71	121.031	-24.167			71	0.646311	0.157223
	72	812.048	694.498	476.66	476.172		72	117.55	0.488			72	0.635144	0.510999
	73	804.939	711.961	444.497	461.108		73	92.978	-16.611			73	0.556315	0.265644
	74	806.695	673.739	439.563	454.512		74	132.956	-14.949			74	0.684568	0.289492
	75	794.129	667.554	426.49	446.441		75	126.575	-19.951			75	0.664097	0.217718
	76	763.182	635.874	415.047	429.209		76	127.308	-14.162			76	0.666449	0.300785
	77	803.689	648.092	413.757	421.243		77	155.597	-7.486			77	0.757202	0.396579
	78	737.253	627.278	419.195	423.493		78	109.975	-4.298			78	0.610843	0.442324
	79	742.971	622.636	423.05	434.414		79	120.335	-11.364			79	0.644079	0.340934
	80	746.245	606.241	419.583	423.677		80	140.004	-4.094			80	0.707178	0.445251
	81	759.862	656.474	425.275	452.773		81	103.388	-27.498			81	0.589711	0.109426
	82	720.212	614.031	401.932	423.333		82	106.181	-21.401			82	0.598671	0.196912
	83	697.786	622.046	404.7	421.342		83	75.74	-16.642			83	0.501014	0.265199
	84	703.442	613.536	407.841	421.036		84	89.906	-13.195			84	0.54646	0.31466
	85	690.628	566.56	392.283	406.33		85	124.068	-14.047			85	0.656054	0.302435
	86	671.945	567.055	411.31	401.07		86	104.89	10.24			86	0.59453	0.650931
	87	721.813	606.774	404.91	414.737		87	115.039	-9.827			87	0.627088	0.362988
	88	775.965	642.81	432.167	421.895		88	133.155	10.272			88	0.685206	0.65139
	89	745.306	615.675	406	410.575		89	129.631	-4.575			89	0.673901	0.438349
	90	765.935	638.626	396.23	410.103		90	127.309	-13.873			90	0.666452	0.304932
	91	755.171	647.299	380.333	392.829		91	107.872	-12.496			91	0.604096	0.32469
	92	744.823	655.79	371.038	392.242		92	89.033	-21.204			92	0.543659	0.199739
	93	751.312	673.11	356.664	372.912		93	78.202	-16.248			93	0.508912	0.270853
	94	822.008	651.237	367.538	372.409		94	170.771	-4.871			94	0.805882	0.434102
	95	833.892	665.205	368.385	363.842		95	168.687	4.543			95	0.799196	0.569184
	96	786.563	625.769	368.444	368.742		96	160.794	-0.298			96	0.773875	0.49972
	97	773.97	631.026	361.083	359.374		97	142.944	1.709			97	0.71661	0.528519
	98	814.776	626.458	379.582	365.224		98	188.318	14.358			98	0.862174	0.71002
	99	849.224	663.229	354.679	354.146		99	185.995	0.533			99	0.854722	0.511644
	100	823.313	647.234	365.067	371.661		100	176.079	-6.594			100	0.82291	0.409379
	101	839.489	641.688	386.107	372.476		101	197.801	13.631			101	0.892596	0.699588
	102	870.339	675.511	382.024	374.761		102	194.828	7.263			102	0.883059	0.608213
	103	846.496	711.156	371.145	375.162		103	135.34	-4.017			103	0.692216	0.446356
	104	802.096	635.361	370.344	380.328		104	166.735	-9.984			104	0.792934	0.360735
	105	797.664	629.47	360.264	358.563		105	168.194	1.701			105	0.797614	0.528404
	106	839.935	647.691	353.992	357.055		106	192.244	-3.063			106	0.874769	0.460045
	107	814.951	638.663	374.943	374.204		107	176.288	0.739			107	0.823581	0.5146
	108	862.737	682.593	347.395	346.919		108	180.144	0.476			108	0.835951	0.510826
	109	855.061	690.353	338.852	342.451		109	164.708	-3.599			109	0.786431	0.452354
	110	865.096	674.613	356.365	353.78		110	190.483	2.585			110	0.86912	0.541089
	111	778.672	602.512	334.543	340.448		111	176.16	-5.905			111	0.82317	0.419265
	112	735.92	584.182	336.545	341.012		112	151.738	-4.467			112	0.744822	0.439899
	113	777.759	615.085	330.481	339.317		113	162.674	-8.836			113	0.779906	0.377208
	114	802.25	617.536	329.482	339.274		114	184.714	-9.792			114	0.850612	0.36349
	115	723.491	612.63	332.038	347.426		115	110.861	-15.388			115	0.613685	0.283193
	116	814.028	614.754	334.468	354.79		116	199.274	-20.322			116	0.897322	0.212395
	117	767.51	631.75	320.99	340.925		117	135.76	-19.935			117	0.693563	0.217948
	118	780.245	622.444	330.5	352.406		118	157.801	-21.906			118	0.764273	0.189666
	119	819.108	594.796	324.477	336.743		119	224.312	-12.266			119	0.977646	0.327991
	120	843.907	612.627	329.047	346.38		120	231.28	-17.333			120	1	0.255284
	121	776.692	593.259	319.449	331.319		121	183.433	-11.87			121	0.846503	0.333673
	122	794	586.043	330.456	346.453		122	207.957	-15.997			122	0.925178	0.274454
	123	767.553	549.87	319.845	333.242		123	217.683	-13.397			123	0.95638	0.311762
	124	746.184	580.099	317.777	331.242		124	166.085	-13.465			124	0.790849	0.310786
	125	671.058	560.23	309.136	323.056		125	110.828	-13.92			125	0.613579	0.304257
	126	683.825	556.894	316.709	327.894		126	126.931	-11.185			126	0.665239	0.343502
	127	684.814	610.526	315.907	327.987		127	74.288	-12.08			127	0.496356	0.33066
	128	746.557	627.903	316.32	324.981		128	118.654	-8.661			128	0.638686	0.379719
	129	749.216	632.305	313.072	316.773		129	116.911	-3.701			129	0.633094	0.45089
	130	793.268	655.929	318.299	317.916		130	137.339	0.383			130	0.698629	0.509492
	131	815.835	651.753	332.396	334.673		131	164.082	-2.277			131	0.784423	0.471323
	132	757.495	637.4	333	338.387		132	120.095	-5.387			132	0.643309	0.426698
	133	727.143	632.2	331.549	341.647		133	94.943	-10.098			133	0.562619	0.359099
	134	790.78	619.72	323.286	335.42		134	171.06	-12.134			134	0.806809	0.329885
	135	770.736	640.273	328.407	331.693		135	130.463	-3.286			135	0.67657	0.456845
	136	742.451	636.613	319.868	324.393		136	105.838	-4.525			136	0.597571	0.439067
	137	790.215	643.067	326.387	328.054		137	147.148	-1.667			137	0.730097	0.480076
	138	784.716	635.486	326.477	323.604		138	149.23	2.873			138	0.736776	0.545221
	139	725.989	590.851	317.62	313.101		139	135.138	4.519			139	0.691568	0.56884
	140	701.539	610.626	313.393	313.728		140	90.913	-0.335			140	0.54969	0.499189
	141	723.733	614.705	310.044	309.5		141	109.028	0.544			141	0.607805	0.511802
	142	755.722	621.301	310.311	306.856		142	134.421	3.455			142	0.689268	0.553572
	143	773.297	637.695	307.857	304.139		143	135.602	3.718			143	0.693056	0.557346
	144	762.407	605.583	310.385	308.57		144	156.824	1.815			144	0.761138	0.53004

## Sheet: exp1-endosome3
endosome 3							dMFI					%dMFI
	frame #	Rab7(rim)	Rab7(background)	Snx1(rim)	Snx1(background)		frame #	Rab7	Snx1			frame #	Rab7	Snx1
	8	687.401	814.728	285.047	309.692		8	-127.327	-24.645			8	0.109654	0.0709328
	9	697.814	820.978	292.192	310.629		9	-123.164	-18.437			9	0.121846	0.2535
	10	679.616	823.165	292.581	310.478		10	-143.549	-17.897			10	0.0621455	0.26938
	11	717.57	882.339	285.872	312.929		11	-164.769	-27.057			11	0	0
	12	708.017	842.487	295.881	319.397		12	-134.47	-23.516			12	0.0887345	0.104135
	13	800.56	850.325	300	320.45		13	-49.765	-20.45			13	0.336804	0.194301
	14	797.701	831.383	288.136	311.062		14	-33.682	-22.926			14	0.383905	0.121486
	15	798.397	811.413	282.62	301.371		15	-13.016	-18.751			15	0.444428	0.244265
	16	908.406	875.589	294.932	307.036		16	32.817	-12.104			16	0.578656	0.439742
	17	989.026	868.024	298.078	305.431		17	121.002	-7.353			17	0.836917	0.579461
	18	980.5	912.904	299.082	310.946		18	67.596	-11.864			18	0.68051	0.4468
	19	1016.38	916.996	297.571	311.025		19	99.384	-13.454			19	0.773605	0.400041
	20	1042.94	936.363	298.495	305.04		20	106.58	-6.545			20	0.79468	0.603223
	21	1064.5	906.02	301.823	304.077		21	158.48	-2.254			21	0.946676	0.729414
	22	1016.68	909.788	281.989	296.625		22	106.897	-14.636			22	0.795608	0.365281
	23	1053.64	905.988	284.851	295.59		23	147.65	-10.739			23	0.914959	0.479885
	24	1029.72	874.029	277.521	286.832		24	155.689	-9.311			24	0.938502	0.52188
	25	1023	876.25	275.133	280.369		25	146.75	-5.236			25	0.912323	0.641719
	26	1009.66	866.968	273.948	276.935		26	142.688	-2.987			26	0.900427	0.707858
	27	1024.52	882.652	269.186	277.68		27	141.869	-8.494			27	0.898028	0.545906
	28	987.681	848.217	272.553	275.176		28	139.464	-2.623			28	0.890985	0.718563
	29	960.256	799.648	288.583	300.419		29	160.608	-11.836			29	0.952908	0.447624
	30	1002.28	833.636	318.199	321.11		30	168.648	-2.911			30	0.976454	0.710093
	31	990.284	813.596	295.443	288.496		31	176.688	6.947			31	1	1
	32	1026.36	873.393	296.57	302.71		32	152.967	-6.14			32	0.93053	0.615134
	33	997.47	848.862	284.113	286.969		33	148.608	-2.856			33	0.917764	0.71171
	34	963.673	820.799	285.256	287.326		34	142.874	-2.07			34	0.900971	0.734825
	35	925.775	824.296	271.219	281.111		35	101.479	-9.892			35	0.779741	0.504794
	36	916.933	811.905	281.512	292.073		36	105.028	-10.561			36	0.790135	0.485119
	37	889.244	780.236	290.305	300.418		37	109.008	-10.113			37	0.801791	0.498294
	38	886.482	769.805	281.652	291.073		38	116.677	-9.421			38	0.82425	0.518645
	39	895.213	786.959	288.299	302.882		39	108.254	-14.583			39	0.799582	0.366839
	40	874.506	817.953	293.5	314.325		40	56.553	-20.825			40	0.648169	0.183273
	41	854.103	781.085	293.891	303.764		41	73.018	-9.873			41	0.696389	0.505352
	42	831.604	823.525	295.743	311.505		42	8.079	-15.762			42	0.506207	0.332167
	43	844.127	796.717	300.407	308.322		43	47.41	-7.915			43	0.621393	0.562934
	44	814.007	766.164	275.133	283.401		44	47.843	-8.268			44	0.622661	0.552553
	45	807.443	759.469	276.979	288.25		45	47.974	-11.271			45	0.623045	0.46424
	46	763.329	712.842	276.143	285.199		46	50.487	-9.056			46	0.630404	0.529379
	47	777.721	664.338	278.252	286.618		47	113.383	-8.366			47	0.814603	0.549671
	48	773.326	694.843	269.363	282.099		48	78.483	-12.736			48	0.712394	0.421156
	49	750.714	673.056	261.529	279.096		49	77.658	-17.567			49	0.709978	0.279085
	50	774.687	715.374	258.916	275.642		50	59.313	-16.726			50	0.656252	0.303817
	51	783.514	688.216	267.304	278.629		51	95.298	-11.325			51	0.761639	0.462651
	52	773.953	706.174	265.484	285.342		52	67.779	-19.858			52	0.681046	0.21171
	53	735.384	664.423	273.225	282.995		53	70.961	-9.77			53	0.690365	0.508381
	54	687.477	675.35	263.422	275.6		54	12.127	-12.178			54	0.518062	0.437566
	55	750.586	692.744	270.961	277.561		55	57.842	-6.6			55	0.651944	0.601606
	56	784.5	709.676	275.387	279.455		56	74.824	-4.068			56	0.701678	0.676068
	57	761.473	704.458	264.473	272.589		57	57.015	-8.116			57	0.649522	0.557023
	58	678.795	592.952	256.393	266.214		58	85.843	-9.821			58	0.733949	0.506882
	59	686.973	670.69	266.232	275.208		59	16.283	-8.976			59	0.530234	0.531732

## Sheet: exp1-endosome4
endosome 4							dMFI					%dMFI
	frame #	Rab7(rim)	Rab7(background)	Snx1(rim)	Snx1(background)		frame #	Rab7	Snx1			frame #	Rab7	Snx1
	8	717.263	730.539	298.164	302.25		8	-13.276	-4.086			8	0	0.0250011
	9	751.814	716.708	301.846	299.604		9	35.106	2.242			9	0.14697	0.297771
	10	781.224	713.216	308.237	300.812		10	68.008	7.425			10	0.246917	0.521186
	11	856.455	751.995	312.756	302.58		11	104.46	10.176			11	0.357647	0.639769
	12	880.197	750.692	334.211	315.678		12	129.505	18.533			12	0.433726	1
	13	892.599	762.702	334.25	318.668		13	129.897	15.582			13	0.434917	0.872796
	14	888.217	756.799	319.829	313.103		14	131.418	6.726			14	0.439538	0.491056
	15	909.559	752.093	308.072	306.108		15	157.466	1.964			15	0.518664	0.285788
	16	958.822	789.314	318.395	306.196		16	169.508	12.199			16	0.555244	0.726971
	17	993.237	797.147	309.908	298.868		17	196.09	11.04			17	0.635992	0.677012
	18	1027.88	843.105	315.385	309.025		18	184.773	6.36			18	0.601614	0.475279
	19	1048.94	825.26	318.75	306.75		19	223.679	12			19	0.719799	0.718393
	20	1064.57	831.885	300.583	298.18		20	232.684	2.403			20	0.747154	0.304711
	21	1095.76	847.17	307.736	298.46		21	248.594	9.276			21	0.795484	0.600974
	22	1108.85	836.145	298.965	294.815		22	272.709	4.15			22	0.868738	0.380016
	23	1189.48	894.516	296.667	298.282		23	294.969	-1.615			23	0.936357	0.131514
	24	1165.52	888.091	287.545	288.075		24	277.432	-0.53			24	0.883085	0.178284
	25	1171.95	856.033	277.843	280.481		25	315.92	-2.638			25	1	0.0874176
	26	1102.75	857.328	281.734	286.4		26	245.422	-4.666			26	0.785848	0
	27	1141.25	858.085	276.71	275.21		27	283.165	1.5			27	0.9005	0.265787
	28	1130.87	850.852	278.108	280.028		28	280.015	-1.92			28	0.890931	0.118367
	29	1080.4	876.571	308.036	292.018		29	203.825	16.018			29	0.659489	0.89159
	30	1108.37	938.427	311.663	314.134		30	169.939	-2.471			30	0.556553	0.0946161
	31	1055.5	910.474	306.755	289.169		31	145.026	17.586			31	0.480875	0.959179
	32	1048.45	921.954	305.694	297.098		32	126.495	8.596			32	0.424583	0.571663
	33	1008.14	915.161	300.337	293.652		33	92.978	6.685			33	0.322768	0.489288
	34	985.065	938.125	298.571	288.132		34	46.94	10.439			34	0.182918	0.651106
	35	996.59	902.086	283.21	286.352		35	94.504	-3.142			35	0.327404	0.0656925
	36	1011	927.16	301.822	285.807		36	83.84	16.015			36	0.29501	0.891461

## Sheet: exp1-endosome5
endosome 5							dMFI					%dMFI
	frame #	Rab7(rim)	Rab7(background)	Snx1(rim)	Snx1(background)		frame #	Rab7	Snx1			frame #	Rab7	Snx1
	8	779.422	761.081	305.961	310.521		8	18.341	-4.56			8	0.0637632	0.580856
	9	815.477	782.386	310.881	312.719		9	33.091	-1.838			9	0.108579	0.691538
	10	885.466	798.655	324.562	320.819		10	86.811	3.743			10	0.2718	0.918473
	11	899.33	801.211	327.136	321.388		11	98.119	5.748			11	0.306158	1
	12	902.119	820.026	325.25	333.991		12	82.093	-8.741			12	0.257465	0.410849
	13	987.46	859.557	336.227	334.351		13	127.903	1.876			13	0.396653	0.842557
	14	989.631	846.303	321.352	322.667		14	143.328	-1.315			14	0.44352	0.712804
	15	1032.65	830.61	302.239	310.114		15	202.038	-7.875			15	0.621902	0.446062
	16	1065.12	838.492	306.583	308.504		16	226.625	-1.921			16	0.696607	0.688163
	17	1138.43	864.177	301.818	306.487		17	274.255	-4.669			17	0.841324	0.576424
	18	1204.41	877.932	305.406	311.881		18	326.479	-6.475			18	1	0.502989
	19	1190.53	900.085	302.383	310.165		19	290.448	-7.782			19	0.890525	0.449843
	20	1130.28	904.466	299.889	308.453		20	225.817	-8.564			20	0.694152	0.418046
	21	1042.3	858.302	296.625	301.871		21	183.999	-5.246			21	0.567093	0.552962
	22	986.517	860.19	290.574	301.341		22	126.327	-10.767			22	0.391864	0.328467
	23	988.074	908.031	292.636	306.412		23	80.043	-13.776			23	0.251237	0.206116
	24	938.196	875.013	282.863	297.036		24	63.183	-14.173			24	0.20001	0.189973
	25	894.423	875.146	278.763	296.844		25	19.277	-18.081			25	0.0666071	0.0310658
	26	909.268	888.804	282.607	299.004		26	20.464	-16.397			26	0.0702137	0.0995405
	27	883.604	856.1	288.927	294.236		27	27.504	-5.309			27	0.0916038	0.550401
	28	901.881	846.237	281.827	295.116		28	55.644	-13.289			28	0.177103	0.225918
	29	922.327	924.972	291.774	310.619		29	-2.645	-18.845			29	0	0
	30	949.554	926.178	299.783	313.817		30	23.376	-14.034			30	0.0790614	0.195625
	31	966.382	899.672	296.977	303.808		31	66.71	-6.831			31	0.210726	0.488513
	32	929.335	915.465	303.813	312.634		32	13.87	-8.821			32	0.0501787	0.407596
	33	894.389	866.349	286.879	299.788		33	28.04	-12.909			33	0.0932323	0.241369
	34	830.064	813.445	285.968	294.972		34	16.619	-9.004			34	0.0585311	0.400155
	35	869.521	829.554	294.403	304.456		35	39.967	-10.053			35	0.129471	0.3575
	36	904.531	786.733	289.476	299.05		36	117.798	-9.574			36	0.36595	0.376977
	37	855.022	808.067	292.05	305.144		37	46.955	-13.094			37	0.150703	0.233847
	38	884.893	817.147	277.143	294.524		38	67.746	-17.381			38	0.213874	0.0595291

## Sheet: exp1-endosome6
endosome 6							dMFI					%dMFI
	frame #	Rab7(rim)	Rab7(background)	Snx1(rim)	Snx1(background)		frame #	Rab7	Snx1			frame #	Rab7	Snx1
	8	884.147	885.411	318.162	316.953		8	-1.264	1.209			8	0.313163	0.792687
	9	867.023	901.202	314.78	321.25		9	-34.179	-6.47			9	0.205248	0.465057
	10	837.197	890.718	318.205	324.809		10	-53.521	-6.604			10	0.141833	0.45934
	11	835.205	862.378	317.78	322.862		11	-27.173	-5.082			11	0.228218	0.524277
	12	824.447	897.622	324.614	333.218		12	-73.175	-8.604			12	0.0773949	0.374008
	13	827.659	898.846	331.068	337.011		13	-71.187	-5.943			13	0.0839128	0.487542
	14	827.644	893.25	322.394	330.342		14	-65.606	-7.948			14	0.102211	0.401997
	15	818.106	874.899	318.515	328.426		15	-56.793	-9.911			15	0.131105	0.318244
	16	830.141	925.472	307.133	322.344		16	-95.331	-15.211			16	0.00475399	0.0921154
	17	817.523	911.028	310.156	325.533		17	-93.505	-15.377			17	0.0107407	0.0850329
	18	835.758	907.799	318.992	333.717		18	-72.041	-14.725			18	0.0811129	0.112851
	19	861.402	941.654	323.886	339		19	-80.252	-15.114			19	0.0541922	0.0962539
	20	867	953.587	318.598	335.163		20	-86.587	-16.565			20	0.0334222	0.0343459
	21	847.03	942.799	320.773	334.549		21	-95.769	-13.776			21	0.00331796	0.153341
	22	859.523	956.304	322.652	336.522		22	-96.781	-13.87			22	0	0.14933
	23	861.28	935.074	319.076	331.197		23	-73.794	-12.121			23	0.0753655	0.223953
	24	873	891.911	319.691	327.807		24	-18.911	-8.116			24	0.255306	0.394829
	25	835.051	896.63	314.897	322.766		25	-61.579	-7.869			25	0.115414	0.405367
	26	837.118	874.57	313.347	315.48		26	-37.452	-2.133			26	0.194517	0.650098
	27	821.076	859.645	317.167	318.59		27	-38.569	-1.423			27	0.190855	0.680391
	28	839.507	858.67	316.326	326.91		28	-19.163	-10.584			28	0.254479	0.28953
	29	917.396	904.075	330.938	341.935		29	13.321	-10.997			29	0.360982	0.271909
	30	997.028	987.525	336.264	346.755		30	9.503	-10.491			30	0.348464	0.293498
	31	967.167	958.355	324.236	330.51		31	8.812	-6.274			31	0.346199	0.473419
	32	1002.17	951.333	329.375	333.529		32	50.838	-4.154			32	0.483986	0.563871
	33	1044.58	965.615	314.903	315.98		33	78.968	-1.077			33	0.576213	0.695153
	34	1027.67	980.84	317.938	319.675		34	46.827	-1.737			34	0.470835	0.666994
	35	1035.24	958.235	316.958	319.265		35	77.001	-2.307			35	0.569764	0.642674
	36	1071.37	971.75	314.701	320.205		36	99.618	-5.504			36	0.643916	0.506272
	37	1122.45	985.279	328.408	328.52		37	137.168	-0.112			37	0.767028	0.736326
	38	1093.34	976.275	316.579	322.216		38	117.061	-5.637			38	0.701105	0.500597
	39	1049.22	958.074	320.513	331.098		39	91.15	-10.585			39	0.616153	0.289487
	40	1117.74	970.928	329.224	339.029		40	146.815	-9.805			40	0.798657	0.322766
	41	1088.53	961.103	325.941	335.279		41	127.423	-9.338			41	0.735078	0.342691
	42	1122.96	994.137	329.461	337.539		42	128.824	-8.078			42	0.739672	0.39645
	43	1146.89	987.279	332.02	338.392		43	159.609	-6.372			43	0.840604	0.469238
	44	1127.12	1004.19	312.196	321.77		44	122.925	-9.574			44	0.720331	0.332622
	45	1140.83	971.005	319.417	323.855		45	169.821	-4.438			45	0.874085	0.551754
	46	1152.45	990.949	307.107	314.918		46	161.501	-7.811			46	0.846807	0.407842
	47	1065.31	936.061	311.657	317.122		47	129.246	-5.465			47	0.741055	0.507936
	48	1029.37	914.98	306.614	314.607		48	114.391	-7.993			48	0.692351	0.400077
	49	1071.13	919.582	302.243	309.25		49	151.547	-7.007			49	0.814171	0.442145
	50	992.357	889.291	310.307	314.087		50	103.066	-3.78			50	0.655221	0.579828
	51	1063.59	917.973	304.591	320.633		51	145.618	-16.042			51	0.794733	0.0566601
	52	1072.57	933.255	308.424	320.181		52	139.313	-11.757			52	0.774061	0.239483
	53	1061.37	967.572	302.969	320.339		53	93.795	-17.37			53	0.624825	0
	54	1092.18	967.674	304.879	315.266		54	124.508	-10.387			54	0.725521	0.297935
	55	1147.81	949.739	301.828	310.328		55	198.073	-8.5			55	0.966712	0.378445
	56	1182.04	992.506	301.081	310.801		56	189.534	-9.72			56	0.938716	0.326393
	57	1146.86	966.312	303.317	306.04		57	180.546	-2.723			57	0.909248	0.624925
	58	1075.23	920.726	285.981	298.457		58	154.505	-12.476			58	0.82387	0.208806
	59	1078.5	904.61	287.981	296.274		59	173.89	-8.293			59	0.887426	0.387277
	60	1015.49	911.931	287.472	299.387		60	103.56	-11.915			60	0.656841	0.232742
	61	1108.74	935.706	287.852	295.481		61	173.035	-7.629			61	0.884622	0.415607
	62	1118.23	961.873	293.078	304.491		62	156.353	-11.413			62	0.829928	0.25416
	63	1115.79	911.122	287.862	295.081		63	204.671	-7.219			63	0.988345	0.4331
	64	1097.68	906.077	294.531	299.609		64	191.607	-5.078			64	0.945513	0.524447
	65	1087.15	905.141	292.082	292.795		65	182.012	-0.713			65	0.914054	0.710684
	66	1054.6	856.167	292.265	294.032		66	198.435	-1.767			66	0.967899	0.665714
	67	1068.68	920.432	283.367	288.622		67	148.246	-5.255			67	0.803349	0.516896
	68	985.624	885.986	283.353	296.207		68	99.638	-12.854			68	0.643982	0.192679
	69	1064.48	918.548	292.027	296.459		69	145.931	-4.432			69	0.795759	0.55201
	70	1094.96	886.733	296.205	298.585		70	208.226	-2.38			70	1	0.63956
	71	1033.07	838.904	288.883	282.815		71	194.161	6.068			71	0.953886	1

## Sheet: exp1-endosome7
endosome 7							dMFI					%dMFI
	frame #	Rab7(rim)	Rab7(background)	Snx1(rim)	Snx1(background)		frame #	Rab7	Snx1			frame #	Rab7	Snx1
	11	662.434	743.206	314.039	315.235		11	-80.772	-1.196			11	0	0.733667
	12	672.551	743.127	308.41	312.929		12	-70.576	-4.519			12	0.0329971	0.564057
	13	681.808	761.057	313.417	315.42		13	-79.249	-2.003			13	0.00492885	0.692477
	14	719.846	781.288	314.372	325.354		14	-61.442	-10.982			14	0.0625572	0.234177
	15	695.269	757.745	303.231	311.153		15	-62.476	-7.922			15	0.0592109	0.390363
	16	708.438	781.583	303.488	312.843		16	-73.145	-9.355			16	0.0246831	0.317221
	17	704.03	749.161	311.679	316.808		17	-45.131	-5.129			17	0.115344	0.532922
	18	753.833	791.165	319.56	321.379		18	-37.332	-1.819			18	0.140584	0.701868
	19	732.785	786.978	311.221	310.027		19	-54.193	1.194			19	0.086017	0.855655
	20	719.597	764.596	303.955	303.184		20	-44.999	0.771			20	0.115771	0.834065
	21	767.83	800.325	305.062	307.636		21	-32.495	-2.574			21	0.156238	0.663332
	22	829.932	841.453	309.597	310.103		22	-11.521	-0.506			22	0.224115	0.768885
	23	808.625	803.198	306.659	310.474		23	5.427	-3.815			23	0.278964	0.59999
	24	800.466	792.569	296.057	298.513		24	7.897	-2.456			24	0.286957	0.669355
	25	781.449	775.319	296.33	295.116		25	6.13	1.214			25	0.281239	0.856676
	26	775.625	785.172	290.864	294.672		26	-9.547	-3.808			26	0.230504	0.600347
	27	780.102	766.931	295.182	292.754		27	13.171	2.428			27	0.304026	0.91864
	28	793.034	789.94	299.375	295.353		28	3.094	4.022			28	0.271414	1
	29	855.938	888.526	311.295	309.203		29	-32.588	2.092			29	0.155937	0.90149
	30	957.847	911.172	318.858	321.466		30	46.675	-2.608			30	0.412454	0.661597
	31	952.648	864.009	302.773	299.69		31	88.639	3.083			31	0.548261	0.952072
	32	1011.95	897.397	311.244	313.065		32	114.552	-1.821			32	0.632123	0.701766
	33	994.318	888.241	304.006	301.873		33	106.077	2.133			33	0.604695	0.903583
	34	987.443	846.917	307.903	307.364		34	140.526	0.539			34	0.716182	0.822223
	35	1063.64	890.364	304.494	305.482		35	173.272	-0.988			35	0.822157	0.744283
	36	1087.37	942.455	301.907	304.804		36	144.911	-2.897			36	0.730373	0.646846
	37	1112.59	955.812	311.808	311.094		37	156.781	0.714			37	0.768787	0.831156
	38	1160.42	962.594	300.43	309.321		38	197.825	-8.891			38	0.901617	0.340904
	39	1169.53	976.75	311.25	312.786		39	192.779	-1.536			39	0.885287	0.716313
	40	1205.15	997.701	314.14	313.884		40	207.45	0.256			40	0.932766	0.807779
	41	1193.25	1016.11	300.413	304.607		41	177.143	-4.194			41	0.834684	0.580645
	42	1233.96	1029.77	306.105	310.576		42	204.187	-4.471			42	0.922206	0.566507
	43	1253.87	1025.65	308.18	313.759		43	228.225	-5.579			43	1	0.509953
	44	1167.17	1022.31	300.524	310.355		44	144.862	-9.831			44	0.730214	0.292926
	45	1144.87	1019.02	297.93	313.5		45	125.85	-15.57			45	0.668686	0
	46	1051.79	958.105	296.75	305.486		46	93.688	-8.736			46	0.564601	0.348816
	47	1130.28	1017.52	294.194	304.551		47	112.762	-10.357			47	0.62633	0.266078
	48	1142.4	1044.63	299.556	308.352		48	97.77	-8.796			48	0.577811	0.345753
	49	1108.46	1054.33	299.363	312.898		49	54.134	-13.535			49	0.436593	0.103869
	50	1142.79	1026.55	298.181	308.532		50	116.241	-10.351			50	0.637589	0.266384
	51	1042.43	1044.72	293.654	300.327		51	-2.296	-6.673			51	0.25397	0.454114
	52	1104.83	1003.3	292.772	307.7		52	101.527	-14.928			52	0.58997	0.0327685
	53	1033.74	973.922	297.148	307.051		53	59.819	-9.903			53	0.454991	0.289251
	54	1055.67	942.662	297.811	301.706		54	113.007	-3.895			54	0.627123	0.595906
	55	1078.04	974.747	295.494	309.654		55	103.29	-14.16			55	0.595676	0.0719682
	56	1060.25	974.968	302.522	302.129		56	85.284	0.393			56	0.537403	0.814771
	57	1088.71	957.621	298.679	302.023		57	131.089	-3.344			57	0.685641	0.62403
	58	1043.52	916.918	306.467	302.971		58	126.602	3.496			58	0.67112	0.973152
	59	1035.19	918.547	293.547	302.65		59	116.648	-9.103			59	0.638906	0.330084
	60	1041.91	918.199	303.453	304.194		60	123.714	-0.741			60	0.661773	0.756891
	61	947.116	886.49	290.463	295.716		61	60.626	-5.253			61	0.457603	0.526592
	62	938.486	827.995	294.993	299.278		62	110.491	-4.285			62	0.61898	0.576
	63	980.081	908.958	284.8	298.607		63	71.123	-13.807			63	0.491574	0.0899857

## Sheet: exp1-endosome8
endosome 8							dMFI					%dMFI
	frame #	Rab7(rim)	Rab7(background)	Snx1(rim)	Snx1(background)		frame #	Rab7	Snx1			frame #	Rab7	Snx1
	8	646.667	676.873	297.872	305.604		8	-30.206	-7.732			8	0.153441	0.450197
	9	631.147	658.179	301.288	312.722		9	-27.032	-11.434			9	0.163302	0.33536
	10	633.006	684.245	300.519	313.377		10	-51.239	-12.858			10	0.0880946	0.291187
	11	634.378	713.972	301.141	317.429		11	-79.594	-16.288			11	0	0.184788
	12	695.53	737.103	308.244	322.911		12	-41.573	-14.667			12	0.118125	0.235072
	13	750.411	774.996	321.5	331.107		13	-24.585	-9.607			13	0.170904	0.392034
	14	776.884	792.987	327.064	339.304		14	-16.103	-12.24			14	0.197257	0.310358
	15	800.375	792.435	321.045	328.069		15	7.94	-7.024			15	0.271955	0.472159
	16	847.881	808.578	318.875	321.341		16	39.303	-2.466			16	0.369394	0.61355
	17	873.994	814.319	319.938	334.616		17	59.675	-14.678			17	0.432687	0.23473
	18	876.341	820.888	317.716	323.608		18	55.453	-5.892			18	0.41957	0.507274
	19	910.5	842.28	318.33	319.026		19	68.22	-0.696			19	0.459235	0.668456
	20	941.942	878.661	326.041	316.049		20	63.281	9.992			20	0.44389	1
	21	952.297	874.973	321.192	322.214		21	77.324	-1.022			21	0.48752	0.658343
	22	915.659	830.534	308.926	304.582		22	85.125	4.344			22	0.511756	0.824798
	23	845.261	757.681	300.381	303.815		23	87.58	-3.434			23	0.519384	0.583522
	24	800.108	736.642	292.057	296.677		24	63.466	-4.62			24	0.444465	0.546732
	25	787.86	745.451	290.797	293.688		25	42.409	-2.891			25	0.379044	0.600366
	26	834.523	755.281	283.33	289.57		26	79.242	-6.24			26	0.493479	0.496479
	27	797.808	762.237	287.267	292.656		27	35.571	-5.389			27	0.3578	0.522877
	28	852.119	772.466	291.165	290.595		28	79.653	0.57			28	0.494756	0.707727
	29	929.983	803.578	300.665	303.888		29	126.405	-3.223			29	0.640007	0.590067
	30	960.472	799.159	311.011	309.358		30	161.313	1.653			30	0.748461	0.741322
	31	956.517	776.065	287.966	290.263		31	180.452	-2.297			31	0.807922	0.618792
	32	990.114	823.302	294.653	297.858		32	166.812	-3.205			32	0.765545	0.590626
	33	1011.44	816.638	301.712	296.571		33	194.802	5.141			33	0.852506	0.849521
	34	990.932	845.608	286.188	296.72		34	145.324	-10.532			34	0.698785	0.36334
	35	996.932	856.004	294.847	301.651		35	140.928	-6.804			35	0.685128	0.478984
	36	1014.8	834.017	297.777	298.079		36	180.787	-0.302			36	0.808963	0.680677
	37	994.848	824.371	297.207	304.571		37	170.477	-7.364			37	0.776932	0.461612
	38	970.707	847.342	296.364	303.483		38	123.365	-7.119			38	0.630562	0.469212
	39	1071.82	886.491	289.835	298.302		39	185.333	-8.467			39	0.823087	0.427397
	40	1110.76	924.621	296.688	302.332		40	186.14	-5.644			40	0.825594	0.514967
	41	1112.19	919.155	302.591	310.004		41	193.033	-7.413			41	0.84701	0.460092
	42	1114.4	952.504	296.386	308.645		42	161.894	-12.259			42	0.750266	0.309768
	43	1095.36	888.355	302.392	304.605		43	207.003	-2.213			43	0.890412	0.621398
	44	1107.35	891.562	301.093	298.121		44	215.787	2.972			44	0.917703	0.782238
	45	1135.89	907.348	298.256	301.152		45	228.542	-2.896			45	0.957331	0.600211
	46	1120.84	913.312	293.151	293.339		46	207.525	-0.188			46	0.892034	0.684214
	47	1095.87	856.902	291.93	288.888		47	238.964	3.042			47	0.98971	0.784409
	48	1114.34	872.067	278.75	283.299		48	242.276	-4.549			48	1	0.548934
	49	1070.06	873.75	279.95	288.722		49	196.306	-8.772			49	0.857178	0.417936
	50	1073.13	835.564	275.866	284.768		50	237.57	-8.902			50	0.985379	0.413903
	51	984.976	815.377	279.28	281.695		51	169.599	-2.415			51	0.774204	0.615132
	52	909.831	778.556	279.188	285.838		52	131.275	-6.65			52	0.655137	0.483761
	53	880.372	755.462	277.064	282.986		53	124.91	-5.922			53	0.635362	0.506344
	54	878.066	753.168	279.875	286.712		54	124.898	-6.837			54	0.635325	0.47796
	55	950.026	799.716	275.072	279.913		55	150.31	-4.841			55	0.714276	0.539877
	56	926.158	818.912	266.901	273.926		56	107.246	-7.025			56	0.580483	0.472128
	57	898.895	795.461	269.954	277.054		57	103.434	-7.1			57	0.56864	0.469802
	58	890.954	746.422	259.776	265.338		58	144.532	-5.562			58	0.696325	0.517511
	59	854.724	732.544	261.033	265.436		59	122.18	-4.403			59	0.62688	0.553463
	60	786.824	699.399	262.203	270.704		60	87.425	-8.501			60	0.518902	0.426342
	61	820.93	726.672	263.901	283.985		61	94.258	-20.084			61	0.540131	0.0670348
	62	855.985	743.404	269.102	282.596		62	112.581	-13.494			62	0.597058	0.271458
	63	821.635	711.262	265.124	278.405		63	110.373	-13.281			63	0.590198	0.278066
	64	841.031	777.027	254.338	271.711		64	64.004	-17.373			64	0.446137	0.151131
	65	892.05	779.126	267.764	277.874		65	112.924	-10.11			65	0.598123	0.376431
	66	808.521	723.403	257.564	266.092		66	85.118	-8.528			66	0.511735	0.425505
	67	724.689	718.599	252.326	264.797		67	6.09	-12.471			67	0.266207	0.303192
	68	726.644	709.2	255.815	263.716		68	17.444	-7.901			68	0.301482	0.444955
	69	743.314	753.419	245.157	267.402		69	-10.105	-22.245			69	0.215892	0
	70	795.556	772.057	256.188	269.28		70	23.499	-13.092			70	0.320294	0.283928
	71	752.712	727.016	250.727	260.734		71	25.696	-10.007			71	0.32712	0.379626
	72	803.721	757.831	254.746	269.798		72	45.89	-15.052			72	0.389859	0.223129
	73	853.353	758.791	256.765	270.446		73	94.562	-13.681			73	0.541076	0.265657
	74	779.36	707.602	257.272	275.249		74	71.758	-17.977			74	0.470227	0.132394
	75	786.898	721.957	261.875	271.217		75	64.941	-9.342			75	0.449048	0.400254
	76	744.756	684.956	264.605	269.9		76	59.8	-5.295			76	0.433075	0.525793
	77	782.205	729.896	250.479	264.035		77	52.309	-13.556			77	0.409802	0.269535
	78	819.597	721.128	260.056	263.756		78	98.469	-3.7			78	0.553214	0.575271
	79	684.513	709.414	245.513	258.379		79	-24.901	-12.866			79	0.169923	0.290939
	80	672.537	666.017	254.438	262.707		80	6.52	-8.269			80	0.267543	0.433539
	81	712.973	693.798	240.573	251.952		81	19.175	-11.379			81	0.30686	0.337066
	82	706.909	744.732	255.527	263.607		82	-37.823	-8.08			82	0.129776	0.439402
	83	747.9	748.946	247.364	263.345		83	-1.046	-15.981			83	0.244036	0.194311
	84	751.847	781.862	248.45	262.952		84	-30.015	-14.502			84	0.154034	0.24019
	85	819.117	757.701	257.252	263.042		85	61.416	-5.79			85	0.438096	0.510438
	86	779.491	764.123	250.368	260.469		86	15.368	-10.101			86	0.295032	0.37671
	87	837.14	774.27	252.66	259.125		87	62.87	-6.465			87	0.442613	0.4895
	88	810.155	752.613	255.567	263.935		88	57.542	-8.368			88	0.42606	0.430468
	89	818.14	778.664	255.538	256.785		89	39.476	-1.247			89	0.369932	0.651363

## Sheet: exp1-endosome9
endosome 9							dMFI					%dMFI
	frame #	Rab7(rim)	Rab7(background)	Snx1(rim)	Snx1(background)		frame #	Rab7	Snx1			frame #	Rab7	Snx1
	36	295.16	276.118	320.25	301.052		36	19.042	19.198			36	0.0138284	0.878006
	37	296.256	276.335	332.519	307.873		37	19.921	24.646			37	0.0200843	1
	38	305.224	285.99	317.737	310.167		38	19.234	7.57			38	0.0151949	0.617627
	39	297.944	280.845	325.611	324.49		39	17.099	1.121			39	0	0.473219
	40	316.027	289.995	330.682	327.145		40	26.032	3.537			40	0.0635765	0.527319
	41	322.401	291.176	329.039	324.333		41	31.225	4.706			41	0.100535	0.553495
	42	335.671	296.873	330.75	327.152		42	38.798	3.598			42	0.154432	0.528685
	43	368.638	326.833	381.467	378.446		43	41.805	3.021			43	0.175833	0.515764
	44	377.209	329.12	393.541	394.075		44	48.089	-0.534			44	0.220557	0.436159
	45	368.953	324.415	363.439	382.07		45	44.538	-18.631			45	0.195284	0.0309239
	46	410.493	341.33	361.291	374.18		46	69.163	-12.889			46	0.370541	0.159501
	47	397.757	336.84	365.194	377.915		47	60.917	-12.721			47	0.311854	0.163263
	48	420.914	356.092	357.279	374.321		48	64.822	-17.042			48	0.339646	0.0665054
	49	426.611	340.18	358.764	372.19		49	86.431	-13.426			49	0.493438	0.147476
	50	447.493	354.605	367.528	376.63		50	92.888	-9.102			50	0.539393	0.244301
	51	446.84	339.91	355.389	370.115		51	106.93	-14.726			51	0.63933	0.118366
	52	479.306	336.85	363.875	379.595		52	142.456	-15.72			52	0.89217	0.0961082
	53	477.047	353.225	373.696	381.455		53	123.822	-7.759			53	0.759551	0.274374
	54	479.146	335.175	361.938	379.75		54	143.971	-17.812			54	0.902952	0.0492633
	55	477.403	344.46	367.222	379.455		55	132.943	-12.233			55	0.824466	0.174191
	56	496.903	340.68	367.278	387.29		56	156.223	-20.012			56	0.99015	0
	57	497.593	341.27	361.793	374.592		57	156.323	-12.799			57	0.990862	0.161516
	58	485.107	327.5	345.486	355.699		58	157.607	-10.213			58	1	0.219423
	59	458.147	321.422	334.5	350.167		59	136.725	-15.667			59	0.851382	0.097295
	60	457.098	327.617	332.53	347.691		60	129.481	-15.161			60	0.799826	0.108626
	61	451.545	321.856	332.811	349.537		61	129.689	-16.726			61	0.801307	0.0735814
	62	426.367	317.989	331.469	349.289		62	108.378	-17.82			62	0.649636	0.0490842
	63	440.57	319.35	328.938	341.567		63	121.22	-12.629			63	0.741033	0.165323
	64	448.992	324.956	332.414	341.65		64	124.036	-9.236			64	0.761074	0.241301
	65	445.4	336.068	325.642	342.903		65	109.332	-17.261			65	0.656425	0.0616015
	66	426.342	328.585	324.308	336.222		66	97.757	-11.914			66	0.574046	0.181334
	67	428.31	325.366	311.207	324.68		67	102.944	-13.473			67	0.610962	0.146424
	68	424.202	333.425	309.421	324.414		68	90.777	-14.993			68	0.524369	0.112387
	69	417.947	336.076	314.274	332.17		69	81.871	-17.896			69	0.460984	0.0473823
	70	444.51	350.081	311.529	325.156		70	94.429	-13.627			70	0.55036	0.142976
	71	421.657	339.519	311.784	325.4		71	82.138	-13.616			71	0.462885	0.143222
	72	420.704	339.207	327.648	334.457		72	81.497	-6.809			72	0.458323	0.295647
	73	401.646	327.369	313.485	326.917		73	74.277	-13.432			73	0.406938	0.147342
	74	397.434	322.548	320.01	333.452		74	74.886	-13.442			74	0.411272	0.147118
	75	467.275	356.952	326.736	336.027		75	110.323	-9.291			75	0.663478	0.240069

## Sheet: exp1-endosome10
endosome 10							dMFI					%dMFI
	frame #	Rab7(rim)	Rab7(background)	Snx1(rim)	Snx1(background)		frame #	Rab7	Snx1			frame #	Rab7	Snx1
	29	586.073	602.159	396.28	414.377		29	-16.086	-18.097			29	0.245071	0.0493276
	30	619.349	627.938	412.616	430.594		30	-8.589	-17.978			30	0.291495	0.0549234
	31	571.551	571.28	378.625	394.177		31	0.271	-15.552			31	0.34636	0.169002
	32	602.773	597.31	392.409	401.414		32	5.463	-9.005			32	0.378511	0.476864
	33	609.277	591.138	391.783	389.663		33	18.139	2.12			33	0.457006	1
	34	603.886	590.408	374.745	383.321		34	13.478	-8.576			34	0.428143	0.497038
	35	595.346	570.832	374.968	384.434		35	24.514	-9.466			35	0.496483	0.455187
	36	588.479	564.402	360.096	370.631		36	24.077	-10.535			36	0.493777	0.404919
	37	599.531	592.762	374.708	386.766		37	6.769	-12.058			37	0.386598	0.333302
	38	601.943	606.875	366.76	376.145		38	-4.932	-9.385			38	0.314141	0.458996
	39	602.094	600.169	378.552	392.036		39	1.925	-13.484			39	0.356602	0.266247
	40	608.515	609.919	382.848	387.746		40	-1.404	-4.898			40	0.335988	0.66999
	41	596.75	600.643	379.195	384.81		41	-3.893	-5.615			41	0.320575	0.636274
	42	591.235	599.718	376.415	390.139		42	-8.483	-13.724			42	0.292152	0.254961
	43	590.775	604.937	362.04	374.433		43	-14.162	-12.393			43	0.256985	0.317549
	44	579.705	597.865	347.02	365.278		44	-18.16	-18.258			44	0.232228	0.0417568
	45	570.917	577.031	348.578	359.777		45	-6.114	-11.199			45	0.306822	0.373695
	46	577.573	598.31	339.297	350.984		46	-20.737	-11.687			46	0.21627	0.350748
	47	568.686	604.061	330.122	345.328		47	-35.375	-15.206			47	0.125625	0.185272
	48	558.122	603.078	329.42	344.299		48	-44.956	-14.879			48	0.0662959	0.200649
	49	553.117	608.779	328.149	347.295		49	-55.662	-19.146			49	0	0
	50	576.085	628.333	334.22	343.944		50	-52.248	-9.724			50	0.0211409	0.443055
	51	573.682	595.988	326.802	336.867		51	-22.306	-10.065			51	0.206554	0.42702
	52	570.865	578.155	334.77	341.444		52	-7.29	-6.674			52	0.299539	0.586476
	53	583.075	590.702	327.465	337.512		53	-7.627	-10.047			53	0.297452	0.427866
	54	558.535	572.722	329.745	334.361		54	-14.187	-4.616			54	0.25683	0.68325
	55	548.688	574.29	329.443	344.536		55	-25.602	-15.093			55	0.186144	0.190586
	56	547.117	574.84	332.032	343.975		56	-27.723	-11.943			56	0.17301	0.33871
	57	549.449	576.738	327.434	337.492		57	-27.289	-10.058			57	0.175697	0.427349
	58	563.877	566.958	322.618	330.085		58	-3.081	-7.467			58	0.325603	0.549186
	59	569.892	565.919	328.221	339.204		59	3.973	-10.983			59	0.369284	0.383852
	60	569.875	573.164	330.025	335.852		60	-3.289	-5.827			60	0.324315	0.626305
	61	559.965	557.361	320.995	330.663		61	2.604	-9.668			61	0.360807	0.445688
	62	557.02	544.169	321.225	331.435		62	12.851	-10.21			62	0.424261	0.420201
	63	545.539	547.285	327.02	335.258		63	-1.746	-8.238			63	0.33387	0.512931
	64	527.457	534.746	325.375	336.136		64	-7.289	-10.761			64	0.299545	0.394291
	65	524.562	543.777	324.76	339.189		65	-19.215	-14.429			65	0.225695	0.221809
	66	536.523	530.268	326.653	334.713		66	6.255	-8.06			66	0.383415	0.521302
	67	533.181	522.805	323.847	331.287		67	10.376	-7.44			67	0.408934	0.550456
	68	530.056	527.085	323.963	334.165		68	2.971	-10.202			68	0.36308	0.420577
	69	542.676	540.871	340.542	344.294		69	1.805	-3.752			69	0.355859	0.723878
	70	551.464	525.636	334.35	337.46		70	25.828	-3.11			70	0.50462	0.754068
	71	547.255	524.504	335.273	335.831		71	22.751	-0.558			71	0.485565	0.874071
	72	552.145	539.551	335.895	343.537		72	12.594	-7.642			72	0.422669	0.540957
	73	554.795	553.338	337.523	343.592		73	1.457	-6.069			73	0.353704	0.614925
	74	573.327	539.261	341.168	351.941		74	34.066	-10.773			74	0.555633	0.393727
	75	552.278	535.449	339.75	342.89		75	16.829	-3.14			75	0.448894	0.752657
	76	542.059	533.864	324.577	336.735		76	8.195	-12.158			76	0.395429	0.3286
	77	544.917	526.654	326.241	336.239		77	18.263	-9.998			77	0.457774	0.43017
	78	569.912	522.898	335.89	347.391		78	47.014	-11.501			78	0.635812	0.359494
	79	549.772	518.314	329.143	340.286		79	31.458	-11.143			79	0.539483	0.376328
	80	576.746	536.35	320.246	330.514		80	40.396	-10.268			80	0.594831	0.417474
	81	569.438	540.904	316.973	328.532		81	28.534	-11.559			81	0.521376	0.356767
	82	586.513	546.596	326.362	332.839		82	39.917	-6.477			82	0.591864	0.59574
	83	591.67	548.518	318.987	327.411		83	43.152	-8.424			83	0.611897	0.504185
	84	578.241	569.55	321.379	329.339		84	8.691	-7.96			84	0.3985	0.526004
	85	558.21	554.029	321.884	332.568		85	4.181	-10.684			85	0.370572	0.397912
	86	577.086	537.108	319.095	330.569		86	39.978	-11.474			86	0.592242	0.360764
	87	589.241	550.924	326.547	332.972		87	38.317	-6.425			87	0.581957	0.598185
	88	599.94	570.649	329.397	341.406		88	29.291	-12.009			88	0.526064	0.335606
	89	602.47	543.007	323.397	332.66		89	59.463	-9.263			89	0.712901	0.464732
	90	600.056	560.122	328.418	341.858		90	39.934	-13.44			90	0.59197	0.268316
	91	606.016	529.88	321.883	331.047		91	76.136	-9.164			91	0.816147	0.469388
	92	576.943	532.909	310.029	320.459		92	44.034	-10.43			92	0.617359	0.409856
	93	601.242	542.922	311.758	323.986		93	58.32	-12.228			93	0.705823	0.325308
	94	621.52	557.682	316.758	327.5		94	63.838	-10.742			94	0.739993	0.395185
	95	648.972	553.5	322.637	329.069		95	95.472	-6.432			95	0.935884	0.597856
	96	668.363	574.587	320.282	339.273		96	93.776	-18.991			96	0.925381	0.00728863
	97	680.016	574.19	333.859	347.083		97	105.826	-13.224			97	1	0.278473
	98	668.839	566.016	318.359	331.993		98	102.823	-13.634			98	0.981404	0.259193
	99	640.21	552.045	319.274	333.032		99	88.165	-13.758			99	0.890636	0.253362
	100	673.065	575.605	330.137	345.447		100	97.46	-15.31			100	0.948194	0.180382
	101	659.738	577.22	335.327	349.543		101	82.518	-14.216			101	0.855667	0.231825
	102	686.065	589.766	343.367	350.76		102	96.299	-7.393			102	0.941005	0.552666
	103	704.807	612.76	343.135	350.99		103	92.047	-7.855			103	0.914675	0.530941
	104	648.91	589.159	333.34	344.041		104	59.751	-10.701			104	0.714685	0.397113
	105	636.492	584.716	316.812	326.325		105	51.776	-9.513			105	0.6653	0.452977
	106	637.496	587.514	327.386	334.51		106	49.982	-7.124			106	0.654191	0.565316
	107	603.042	549.159	329.967	343.226		107	53.883	-13.259			107	0.678348	0.276827
	108	606.076	549.13	319.746	334.661		108	56.946	-14.915			108	0.697315	0.198956
	109	578.652	556.594	319.665	330.79		109	22.058	-11.125			109	0.481274	0.377175
	110	556.25	555.815	318.205	333.011		110	0.435	-14.806			110	0.347376	0.204082
	111	560.914	556.941	310.973	321.14		111	3.973	-10.167			111	0.369284	0.422223
	112	583.059	576.088	312.036	328.246		112	6.971	-16.21			112	0.387849	0.138061
	113	577.85	550.728	313.427	328.915		113	27.122	-15.488			113	0.512633	0.172012
	114	580.987	559.964	315.286	333.257		114	21.023	-17.971			114	0.474865	0.0552525
	115	582.597	544.733	318.496	331.668		115	37.864	-13.172			115	0.579151	0.280918
	116	609.665	552.599	332.585	343.712		116	57.066	-11.127			116	0.698058	0.377081
	117	600.159	540.795	337.216	347.882		117	59.364	-10.666			117	0.712288	0.398759
	118	583.996	543.045	324.754	339.146		118	40.951	-14.392			118	0.598267	0.223549
	119	628.435	551.911	336.485	346.805		119	76.524	-10.32			119	0.81855	0.415029
	120	592.252	554.441	325.004	339.666		120	37.811	-14.662			120	0.578823	0.210853
	121	579.702	535.305	321.169	336.007		121	44.397	-14.838			121	0.619606	0.202577
	122	580	528.457	330.894	346.351		122	51.543	-15.457			122	0.663857	0.173469
	123	553.708	510.076	333.758	342.959		123	43.632	-9.201			123	0.614869	0.467648
	124	534.54	502.739	325.884	337.086		124	31.801	-11.202			124	0.541607	0.373554
	125	525.189	516.074	317.486	329.177		125	9.115	-11.691			125	0.401126	0.35056
	126	515.335	507.942	318.032	329.19		126	7.393	-11.158			126	0.390462	0.375623
	127	554.821	505.839	320.379	331.829		127	48.982	-11.45			127	0.647999	0.361892
	128	541.282	513.102	329.551	338.431		128	28.18	-8.88			128	0.519184	0.482742

[truncated: 56 more sheets: exp1-endosome11, exp1-endosome12, exp1-endosome13, exp1-endosome14, exp1-endosome15, exp1-endosome16, exp1-endosome17, exp1-endosome18, exp1-endosome19, exp1-time, exp1-aligned, exp2-endosome1, exp2-endosome2, exp2-endosome3, exp2-endosome4, exp2-endosome5, exp2-endosome6, exp2-endosome7, exp2-endosome8, exp2-endosome9 …]
