# Supplementary material for: A novel live-cell imaging assay reveals regulation of endosome maturation
Source: eLife. 2021 Nov 30;10:e70982. doi: 10.7554/eLife.70982 (PMC8635980; doi:10.7554/eLife.70982)
Supplement: Figure 8—figure supplement 1—source data 1. [file elife-70982-fig8-figsupp1-data1.xlsx]

## Sheet: sheet 1
line profiles
	t32				t33				t34				t35				t36				t37				t38				t39				t40				t41				t42				t43				t44
		Rab5	Rab11			Rab5	Rab11			Rab5	Rab11			Rab5	Rab11			Rab5	Rab11			Rab5	Rab11			Rab5	Rab11			Rab5	Rab11			Rab5	Rab11			Rab5	Rab11			Rab5	Rab11			Rab5	Rab11
	0	444.394	621.144		0	419.935	911.23		0	481.759	669.485		0	556.49	713.928		0	524.56	615.842		0	472.166	634.301		0	536.902	893.615		0	518.217	690.084		0	452.122	657.688		0	465.281	629.093		0	525.459	638.515		0	401.768	614.272		0
	0.10913	414.251	636.561		0.10913	417.249	817		0.10913	504.81	670.677		0.10913	530.859	684.372		0.10913	494.458	607.759		0.10913	477.701	639.904		0.10913	543.148	936.322		0.10913	501.847	701.356		0.10913	459.485	654.025		0.10913	491.747	650.054		0.10913	479.59	623.319		0.10913	398.505	607.72		0.10913
	0.21825	408.294	693.882		0.21825	428.515	760.561		0.21825	497.944	655.283		0.21825	531.38	701.937		0.21825	502.067	629.83		0.21825	482.089	635.711		0.21825	525.552	946.785		0.21825	499.916	717.602		0.21825	452.171	657.5		0.21825	494.873	660.158		0.21825	499.156	639.561		0.21825	406.747	632.149		0.21825
	0.32738	406.25	689.366		0.32738	420.104	714.48		0.32738	504.817	643.846		0.32738	534.073	700.837		0.32738	510.501	646.032		0.32738	513.797	672.483		0.32738	523.835	897.658		0.32738	496.236	726.649		0.32738	449.33	669.885		0.32738	488.134	650.312		0.32738	501.345	646.643		0.32738	409.574	657.333		0.32738
	0.43651	406.957	693.999		0.43651	405.051	704.455		0.43651	485.832	667.854		0.43651	532.665	713.494		0.43651	496.786	694.894		0.43651	505.896	703.896		0.43651	541.857	865.847		0.43651	496.684	713.894		0.43651	464.538	696.066		0.43651	480.171	676.122		0.43651	501.113	659.397		0.43651	401.63	683.73		0.43651
	0.54563	387.818	704.864		0.54563	413.252	673.471		0.54563	469.622	672.806		0.54563	538.494	726.052		0.54563	506.242	701.548		0.54563	529.971	741.91		0.54563	527.702	794.456		0.54563	507.708	702.133		0.54563	459.172	720.042		0.54563	489.473	681.714		0.54563	509.87	670.453		0.54563	412.914	686.118		0.54563
	0.65476	391.084	729.863		0.65476	423.014	673.521		0.65476	476.874	700.852		0.65476	533.085	739.978		0.65476	505.486	682.17		0.65476	535.853	778.6		0.65476	541.665	778.434		0.65476	496.878	715.92		0.65476	462.656	743.066		0.65476	482.455	692.247		0.65476	510.684	670.243		0.65476	404.632	694.195		0.65476
	0.76389	406.605	736.206		0.76389	413.34	677.408		0.76389	498.076	725.602		0.76389	541.469	807.578		0.76389	511.73	679.986		0.76389	524.767	814.726		0.76389	536.432	798.697		0.76389	503.809	700.572		0.76389	475.749	753.292		0.76389	478.117	670.18		0.76389	513.389	653.598		0.76389	419.287	655.935		0.76389
	0.87302	397.39	760.133		0.87302	412.325	706.389		0.87302	490.987	751.491		0.87302	542.754	778.213		0.87302	509.444	703.688		0.87302	519.964	838.058		0.87302	539.186	773.661		0.87302	483.025	702.274		0.87302	454.713	732.532		0.87302	484.916	676.361		0.87302	512.531	702.076		0.87302	437.381	658.167		0.87302
	0.98214	406.891	737.335		0.98214	421.336	721.149		0.98214	475.419	743.326		0.98214	523.226	778.18		0.98214	528.914	689.576		0.98214	515.508	851.387		0.98214	523.941	776.093		0.98214	478.466	705.053		0.98214	458.144	708.2		0.98214	493.397	674.369		0.98214	518.302	715.204		0.98214	429.33	682.233		0.98214
	1.09127	423.55	753.069		1.09127	422.274	723.756		1.09127	494.137	742.404		1.09127	504.82	746.215		1.09127	527.639	690.739		1.09127	525.52	834.234		1.09127	527.318	782.073		1.09127	469.19	703.97		1.09127	477.236	743.573		1.09127	475.646	669.483		1.09127	503.524	710.045		1.09127	437.081	703.159		1.09127
	1.2004	405.696	769.003		1.2004	422.173	741.882		1.2004	502.356	756.981		1.2004	512.906	772.254		1.2004	513.656	685.023		1.2004	523.342	806.727		1.2004	521.412	795.845		1.2004	489.205	736.622		1.2004	476.745	739.013		1.2004	502.231	660.699		1.2004	497.131	703.538		1.2004	439.9	686.329		1.2004
	1.30952	410.904	759.609		1.30952	420.308	775.576		1.30952	522.389	760.184		1.30952	516.339	748.59		1.30952	504.974	694.746		1.30952	512.293	804.071		1.30952	528.401	836.349		1.30952	500.974	746.051		1.30952	488.528	757.236		1.30952	494.957	646.47		1.30952	487.728	689.726		1.30952	437.15	673.254		1.30952
	1.41865	410.01	783.241		1.41865	425.355	788.465		1.41865	544.945	788.58		1.41865	512.086	743.103		1.41865	505.284	702.246		1.41865	510.106	804.169		1.41865	556.49	856.603		1.41865	516.559	783.185		1.41865	490.591	748.862		1.41865	489.398	638.385		1.41865	496.209	702.535		1.41865	441.825	686.491		1.41865
	1.52778	432.173	792.561		1.52778	435.235	818.827		1.52778	540.46	809.689		1.52778	493.444	739.285		1.52778	500.563	709.076		1.52778	511.521	795.214		1.52778	548.827	858.904		1.52778	503.378	849.382		1.52778	493.086	750.177		1.52778	501.882	694.607		1.52778	507.298	730.28		1.52778	451.789	695.101		1.52778
	1.6369	430.314	801.008		1.6369	465.939	788.585		1.6369	524.452	820.304		1.6369	513.829	740.976		1.6369	491.57	739.286		1.6369	503.282	813.834		1.6369	576.514	856.812		1.6369	514.31	938.522		1.6369	513.307	752.683		1.6369	487.028	713.707		1.6369	532.081	744.42		1.6369	463.155	710.786		1.6369
	1.74603	416.127	806.655		1.74603	479.691	790.486		1.74603	501.289	836.615		1.74603	540.33	747.778		1.74603	484.978	760.938		1.74603	501.877	813.322		1.74603	554.742	803.235		1.74603	535.692	956.483		1.74603	529.702	752.596		1.74603	506.941	719.384		1.74603	548.454	786.045		1.74603	519.864	733.226		1.74603
	1.85516	412.678	845.474		1.85516	465.778	798.573		1.85516	498.571	817.558		1.85516	532.181	766.966		1.85516	504.455	788.596		1.85516	505.658	827.486		1.85516	548.846	807.353		1.85516	526.739	908.117		1.85516	515.097	747.527		1.85516	486.342	715.457		1.85516	561.831	796.88		1.85516	600.466	750.242		1.85516
	1.96429	425.781	839.03		1.96429	479.42	793.589		1.96429	498.026	822.578		1.96429	547.973	788.48		1.96429	488.756	809.585		1.96429	509.273	844.994		1.96429	542.587	812.357		1.96429	557.874	826.433		1.96429	499.032	753.166		1.96429	503.764	728.159		1.96429	559.163	828.667		1.96429	705.111	781.722		1.96429
	2.07341	419.51	849.899		2.07341	481.031	821.875		2.07341	507.23	839.598		2.07341	536.262	831.993		2.07341	499.997	815.2		2.07341	526.758	824.989		2.07341	555.642	823.467		2.07341	581.399	816.484		2.07341	490.365	778.689		2.07341	506.787	710.488		2.07341	534.613	860.588		2.07341	743.903	771.518		2.07341
	2.18254	417.805	867.433		2.18254	476.031	798.23		2.18254	504.085	849.903		2.18254	545.847	870.648		2.18254	508.705	792.832		2.18254	508.249	796.903		2.18254	552.024	815.503		2.18254	564.188	794.984		2.18254	499.852	760.667		2.18254	501.725	696.255		2.18254	513.681	930.069		2.18254	735.401	754.368		2.18254
	2.29167	421.608	865.656		2.29167	460.11	775.993		2.29167	494.729	866.348		2.29167	545.033	856.278		2.29167	519.818	785.572		2.29167	521.963	792.087		2.29167	543.144	796.718		2.29167	543.077	806.981		2.29167	516.157	769.344		2.29167	531.166	718.306		2.29167	514.182	983.075		2.29167	651.864	747.421		2.29167
	2.40079	423.396	864.376		2.40079	447.55	774.668		2.40079	497.497	868.601		2.40079	531.436	898.108		2.40079	534.925	778.809		2.40079	509.397	822.51		2.40079	558.399	783.663		2.40079	522.324	809.918		2.40079	519.548	761.515		2.40079	523.414	710.548		2.40079	500.947	957.862		2.40079	569.812	737.711		2.40079
	2.50992	417.625	851.202		2.50992	453.177	787.488		2.50992	473.596	880.935		2.50992	523.857	943.661		2.50992	514.039	775.108		2.50992	498.026	832.461		2.50992	538.217	804.274		2.50992	538.411	825.189		2.50992	514.199	785.811		2.50992	549.885	730.265		2.50992	489.522	909.88		2.50992	494.685	724.243		2.50992
	2.61905	420.095	847.502		2.61905	450.771	802.883		2.61905	472.63	887.406		2.61905	535.205	926.682		2.61905	497.997	773.654		2.61905	507.841	812.896		2.61905	532.672	843.88		2.61905	521.355	834.612		2.61905	494.254	768.871		2.61905	555.617	712.132		2.61905	480.08	880.473		2.61905	460.203	729.399		2.61905
	2.72817	419.369	841.768		2.72817	442.74	812.022		2.72817	472.217	863.483		2.72817	544.606	937.946		2.72817	509.404	747.557		2.72817	497.898	823.445		2.72817	539.783	834.428		2.72817	518.581	807.756		2.72817	488.215	750.051		2.72817	550.888	717.218		2.72817	497.56	871.946		2.72817	459.95	755.496		2.72817
	2.8373	410.381	841.696		2.8373	440.41	803.755		2.8373	465.743	868.142		2.8373	531.98	947.996		2.8373	515.494	755.26		2.8373	501.837	781.546		2.8373	557.539	832.408		2.8373	517.828	800.898		2.8373	472.17	738.253		2.8373	555.642	766.952		2.8373	482.27	859.764		2.8373	441.715	718.637		2.8373
	2.94643	432.642	816.728		2.94643	443.378	798.424		2.94643	467.578	872.266		2.94643	531.624	925.254		2.94643	521.654	785.641		2.94643	500.484	799.317		2.94643	566.916	840.992		2.94643	537.103	828.388		2.94643	497.22	719.631		2.94643	548.479	815.492		2.94643	467.861	845.35		2.94643	442.272	726.217		2.94643
	3.05556	410.003	849.165		3.05556	434.521	815.118		3.05556	480.257	867.426		3.05556	549.282	894.014		3.05556	514.059	802.209		3.05556	474.083	819.659		3.05556	571.595	852.492		3.05556	529.427	815.653		3.05556	491.385	730.318		3.05556	514.759	816.93		3.05556	477.693	800.791		3.05556	447.243	744.223		3.05556
	3.16468	410.167	858.868		3.16468	446.217	804.932		3.16468	489.135	830.616		3.16468	536.685	875.01		3.16468	504.637	827.526		3.16468	479.663	857.308		3.16468	573.113	850.782		3.16468	521.018	830.334		3.16468	496.54	730.671		3.16468	512.952	801.578		3.16468	467.54	784.11		3.16468	450.011	761.226		3.16468
	3.27381	417.492	906.273		3.27381	425.082	801.604		3.27381	495.625	838.817		3.27381	525.187	839.462		3.27381	503.844	859.096		3.27381	485.125	930.667		3.27381	554.536	859.947		3.27381	532.882	834.436		3.27381	503.103	739.188		3.27381	527.474	777.703		3.27381	434.72	764.79		3.27381	442.793	770.098		3.27381
	3.38294	411.03	906.494		3.38294	435.502	815.45		3.38294	500.16	836.37		3.38294	548.403	874.386		3.38294	502.817	852.867		3.38294	480.22	940.998		3.38294	551.318	908.796		3.38294	525.365	855.569		3.38294	521.778	770.246		3.38294	532.175	778.028		3.38294	461.364	788.636		3.38294	447.604	734.945		3.38294
	3.49206	407.717	890.498		3.49206	434.616	809.818		3.49206	491.166	834.428		3.49206	557.459	840.696		3.49206	531.776	871.465		3.49206	477.356	943.795		3.49206	560.877	983.976		3.49206	540.431	828.504		3.49206	543.345	801.259		3.49206	524.187	777.177		3.49206	442.479	813.735		3.49206	486.967	758.65		3.49206
	3.60119	437.425	882.537		3.60119	441.825	803.061		3.60119	479.984	848.208		3.60119	533.729	859.165		3.60119	529.449	858.111		3.60119	484.78	884.573		3.60119	584.298	963.175		3.60119	534.95	819.198		3.60119	560.991	834.788		3.60119	522.208	754.444		3.60119	461.324	826.622		3.60119	486.488	761.516		3.60119
	3.71032	424.605	859.794		3.71032	439.086	787.999		3.71032	501.148	833.843		3.71032	526.736	906.414		3.71032	532.023	824.393		3.71032	503.169	888.516		3.71032	572.498	1021.04		3.71032	508.968	808.798		3.71032	554.827	870.834		3.71032	526.933	734.513		3.71032	447.249	859.684		3.71032	501.251	759.867		3.71032
	3.81944	439.096	876.935		3.81944	440.245	778.973		3.81944	520.972	810.428		3.81944	528.938	907.255		3.81944	575.34	812.41		3.81944	506.235	906.438		3.81944	604.234	1016.77		3.81944	534.654	827.806		3.81944	551.312	884.562		3.81944	520.32	752.751		3.81944	455.622	885.703		3.81944	512.142	752.307		3.81944
	3.92857	421.122	824.239		3.92857	451.586	779.178		3.92857	527.993	860.246		3.92857	525.322	878.731		3.92857	595.046	792.403		3.92857	508.678	974.223		3.92857	610.943	1027.32		3.92857	516.315	787.427		3.92857	553.921	872.934		3.92857	518.115	753.443		3.92857	470.478	866.696		3.92857	506.11	747.139		3.92857
	4.0377	414.971	817.576		4.0377	442.268	773.153		4.0377	532.017	837.271		4.0377	549.709	863.543		4.0377	584.04	814.17		4.0377	505.243	1049.51		4.0377	648.706	1032.86		4.0377	519.138	795.042		4.0377	553.126	835.863		4.0377	531.794	758.212		4.0377	465.591	821.055		4.0377	502.083	758.125		4.0377
	4.14683	402.767	827.525		4.14683	447.273	779.664		4.14683	524.849	837.961		4.14683	554.765	810.632		4.14683	570.329	825.724		4.14683	517.643	1117.84		4.14683	641.379	998.272		4.14683	512.259	777.792		4.14683	545.566	775.337		4.14683	521.088	750.319		4.14683	473.761	796.807		4.14683	495.814	763.219		4.14683
	4.25595	431.069	849.563		4.25595	449.68	757.516		4.25595	520.126	812.971		4.25595	549.393	825.781		4.25595	570.031	810.792		4.25595	519.342	1191.45		4.25595	599.65	953.322		4.25595	534.5	797.699		4.25595	559.604	758.241		4.25595	528.727	752.967		4.25595	492.181	777.047		4.25595	508.205	769.881		4.25595
	4.36508	425.988	841.799		4.36508	443.624	757.511		4.36508	522.506	783.916		4.36508	560.562	813.187		4.36508	551.499	821.807		4.36508	519.246	1166.67		4.36508	586.5	893.851		4.36508	537.795	773.44		4.36508	523.317	757.829		4.36508	532.929	729.396		4.36508	508.236	787.033		4.36508	490.083	779.21		4.36508
	4.47421	416.884	821.949		4.47421	452.883	746.178		4.47421	517.761	750.803		4.47421	576.16	841.676		4.47421	537.094	840.895		4.47421	525.546	1082.51		4.47421	557.172	842.23		4.47421	529.409	768.952		4.47421	503.898	767.411		4.47421	518.606	739.575		4.47421	544.204	787.342		4.47421	475.463	792.574		4.47421
	4.58333	407.382	826.023		4.58333	441.521	747.766		4.58333	511.647	755.345		4.58333	578.113	844.116		4.58333	532.607	862.629		4.58333	530.556	986.334		4.58333	535.081	809.582		4.58333	550.943	767.637		4.58333	512.804	752.213		4.58333	534.933	717.223		4.58333	555.264	772.572		4.58333	461.279	798.86		4.58333
	4.69246	416.685	827.126		4.69246	428.81	751.402		4.69246	521.707	749.29		4.69246	569.066	843.851		4.69246	543.359	901.607		4.69246	531.241	919.735		4.69246	528.16	795.471		4.69246	574.254	754.148		4.69246	518.692	742.656		4.69246	522.502	723.611		4.69246	519.735	755.984		4.69246	467.503	793.454		4.69246
	4.80159	438.522	818.152		4.80159	417.247	741.193		4.80159	517.547	762.07		4.80159	584.196	842.245		4.80159	543.641	911.177		4.80159	517.346	870.614		4.80159	537.146	788.774		4.80159	571.287	726.824		4.80159	499.615	759.968		4.80159	501.667	721.049		4.80159	471.122	750.843		4.80159	500.216	775.544		4.80159
	4.91071	430.988	774.586		4.91071	432.3	732.177		4.91071	505.727	787.944		4.91071	567.494	839.365		4.91071	534.682	896.396		4.91071	489.57	856.527		4.91071	530.833	781.893		4.91071	553.185	705.495		4.91071	476.996	782.402		4.91071	521.368	735.117		4.91071	493.781	729.406		4.91071	513.124	760.926		4.91071
	5.01984	431.406	739.232		5.01984	423.557	728.558		5.01984	510.462	835.25		5.01984	585.366	862.75		5.01984	531.218	885.713		5.01984	488.375	843.9		5.01984	514.492	764.118		5.01984	552.299	699.187		5.01984	473.721	817.92		5.01984	557.75	728.729		5.01984	468.83	728.52		5.01984	534.922	728.831		5.01984
	5.12897	442.106	729.464		5.12897	446.276	757.139		5.12897	493.647	831.684		5.12897	583.553	920.856		5.12897	532.248	864.5		5.12897	482.865	841.745		5.12897	522.47	746.748		5.12897	539.06	664.065		5.12897	484.03	830.75		5.12897	588.832	704.584		5.12897	472.39	734.414		5.12897	520.366	729.142		5.12897
	5.2381	455.196	738.221		5.2381	439.517	748.658		5.2381	484.222	733.17		5.2381	528.382	948.36		5.2381	522.486	776.27		5.2381	488.232	835.358		5.2381	505.341	747.689		5.2381	515.591	671.808		5.2381	487.788	810.286		5.2381	554.584	692.715		5.2381	512.644	721.35		5.2381	504.973	729.106		5.2381
	5.34722	455.062	728.438		5.34722	458.099	768.226		5.34722	487.348	700.928		5.34722	557.758	919.556		5.34722	499.773	752.686		5.34722	500.455	831.638		5.34722	516.529	739.065		5.34722	512.685	674.284		5.34722	476.723	741.002		5.34722	531.872	691.593		5.34722	518.486	713.654		5.34722	518.352	731.596		5.34722
	5.45635	443.628	698.916		5.45635	452.755	727.428		5.45635	471.787	680.575		5.45635	523.401	896.491		5.45635	510.701	707.337		5.45635	480.879	824.592		5.45635	510.493	740.432		5.45635	522.132	685.275		5.45635	460.981	693.164		5.45635	528.5	710.394		5.45635	510.642	702.283		5.45635	493.382	746.906		5.45635
	5.56548	432.496	687.202		5.56548	443.178	721.773		5.56548	469.747	689.523		5.56548	529.031	911.753		5.56548	506.391	682.508		5.56548	501.637	820.097		5.56548	507.969	713.746		5.56548	519.591	665.493		5.56548	473.938	690.01		5.56548	516.729	715.981		5.56548	498.826	698.453		5.56548	480.017	746.516		5.56548
	5.6746	423.118	697.396		5.6746	434.109	711.422		5.6746	447.214	684.307		5.6746	545.799	958.293		5.6746	492.742	692.043		5.6746	513.981	811.878		5.6746	537.792	723.668		5.6746	543.623	659.957		5.6746	459.283	667.601		5.6746	496.128	708.186		5.6746	486.528	694.944		5.6746	469.557	726.862		5.6746
	5.78373	423.885	689.807		5.78373	448.471	691.574		5.78373	442.067	672.952		5.78373	562.783	997.648		5.78373	491.023	670.992		5.78373	525.239	779.851		5.78373	526.014	701.912		5.78373	536.677	670.909		5.78373	457.746	659.632		5.78373	489.311	688.146		5.78373	504.552	697.632		5.78373	476.152	686.899		5.78373
	5.89286	422.987	674.935		5.89286	445.495	683.132		5.89286	431.653	645.509		5.89286	573.092	1074.26		5.89286	496.177	661.147		5.89286	508.71	758.218		5.89286	515.974	729.016		5.89286	508.454	671.807		5.89286	428.392	653.162		5.89286	507.39	689.372		5.89286	519.166	703.499		5.89286	472.013	678.829		5.89286
	6.00198	416.241	685.9		6.00198	447.955	689.453		6.00198	431.515	631.224		6.00198	596.948	1149.65		6.00198	505.044	665.954		6.00198	501.119	752.53		6.00198	522.341	731.141		6.00198	511.19	688.833		6.00198	450.554	630.882		6.00198	512.776	659.95		6.00198	518.441	691.662		6.00198	462.417	682.377		6.00198
	6.11111	412.808	654.674		6.11111	436.631	660.106		6.11111	414.73	651.745		6.11111	592.838	1119.43		6.11111	492.567	658.875		6.11111	471.269	732.653		6.11111	516.766	761.776		6.11111	517.205	704.46		6.11111	464.117	635.712		6.11111	507.34	647.169		6.11111	514.738	709.252		6.11111	459.829	695.294		6.11111
	6.22024	391.621	659.362		6.22024	442.008	647.031		6.22024	425.475	642.835		6.22024	586.164	1022.59		6.22024	480.804	654.732		6.22024	474.907	708.754		6.22024	507.433	783.478		6.22024	519.161	699.005		6.22024	462.559	649.397		6.22024	513.065	643.222		6.22024	540.587	700.335		6.22024	456.275	679.863		6.22024
	6.32937	408.606	646.887		6.32937	434.788	638.965		6.32937	432.204	630.798		6.32937	566.932	919.087		6.32937	484.47	669.924		6.32937	487.832	701.191		6.32937	514.237	740.694		6.32937	517.56	707.388		6.32937	462.94	648.338		6.32937	532.256	617.093		6.32937	557.18	697.161		6.32937	455.628	676.935		6.32937
	6.43849	420.104	646.08		6.43849	431.587	626.861		6.43849	429.149	653.09		6.43849	550.57	894.472		6.43849	487.346	660.32		6.43849	482.24	685.755		6.43849	500.373	706.183		6.43849	528.679	698.869		6.43849	479.949	691.913		6.43849	535.28	604.057		6.43849	562.648	738.665		6.43849	464.645	679.687		6.43849
	6.54762	423.28	661.832		6.54762	423.71	665.258		6.54762	437.689	625.573		6.54762	531.917	890.692		6.54762	491.816	639.483		6.54762	494.52	656.68		6.54762	505.64	671.448		6.54762	536.479	694.712		6.54762	477.805	667.04		6.54762	534.513	618.453		6.54762	553.631	775.502		6.54762	472.258	670.184		6.54762
	6.65675	426.019	685.855		6.65675	445.515	638.709		6.65675	441.876	629.365		6.65675	539.683	847.704		6.65675	519.199	622.889		6.65675	491.93	650.476		6.65675	495.64	660.222		6.65675	531.658	700.725		6.65675	482.566	680.136		6.65675	519.633	614.816		6.65675	540.511	811.734		6.65675	481.501	674.796		6.65675
	6.76587	403.302	656.937		6.76587	440.592	660.21		6.76587	429.135	637.979		6.76587	522.63	812.117		6.76587	514.278	609.976		6.76587	469.768	652.193		6.76587	503.522	640.43		6.76587	540.132	701.723		6.76587	469.846	710.54		6.76587	504.686	592.951		6.76587	496.92	871.112		6.76587	512.041	671.259		6.76587
	6.875	426.878	656.221		6.875	442.548	676.413		6.875	407.192	615.594		6.875	501.074	757.968		6.875	498.1	644.078		6.875	469.843	644.448		6.875	502.141	654.509		6.875	533.422	700.826		6.875	459.656	690.495		6.875	503.656	572.314		6.875	480.708	856.401		6.875	536.95	644.422		6.875
	6.98413	425.701	648.953		6.98413	435.13	670.098		6.98413	423.748	614.815		6.98413	526.083	742.837		6.98413	486.289	610.601		6.98413	493.97	664.822		6.98413	508.09	682.227		6.98413	536.507	715.683		6.98413	463.949	685.722		6.98413	500.44	577.052		6.98413	490.027	830.69		6.98413	548.521	647.574		6.98413
	7.09325	407.109	665.654		7.09325	443.967	655.399		7.09325	417.35	640.082		7.09325	519.693	748.572		7.09325	481.82	611.806		7.09325	487.493	642.744		7.09325	527.171	687.339		7.09325	533.52	697.698		7.09325	485.855	658.925		7.09325	489.591	558.085		7.09325	454.388	795.552		7.09325	577.44	647.877		7.09325
	7.20238	421.495	687.11		7.20238	430.92	648.847		7.20238	420.645	654.081		7.20238	522.657	714.328		7.20238	476.072	620.277		7.20238	470.571	648.436		7.20238	513.255	706.558		7.20238	531.431	733.976		7.20238	488.277	653.144		7.20238	474.462	548.52		7.20238	441.597	773.837		7.20238	581.776	630.608		7.20238
	7.31151	431.564	676.039		7.31151	417.856	653.93		7.31151	436.708	680.614		7.31151	537.343	747.207		7.31151	478.753	638.376		7.31151	479.261	670.809		7.31151	504.179	715.029		7.31151	523.745	720.073		7.31151	494.55	646.339		7.31151	460.498	552.589		7.31151	446.162	780.446		7.31151	556.745	625.616		7.31151
	7.42063	440.518	657.954		7.42063	434.217	645.52		7.42063	449.635	671.74		7.42063	512.639	800.252		7.42063	464.469	667.219		7.42063	478.292	695.9		7.42063	506.87	701.428		7.42063	513.254	723.709		7.42063	480.29	643.568		7.42063	458.646	545.242		7.42063	451.953	773.599		7.42063	519.186	628.861		7.42063
	7.52976	431.618	632.013		7.52976	465.622	662.38		7.52976	444.231	667.938		7.52976	513.804	826.272		7.52976	453.26	735.509		7.52976	470.966	713.712		7.52976	507.621	688.325		7.52976	520.082	669.692		7.52976	482.352	661.021		7.52976	446.436	560.587		7.52976	464.839	749.523		7.52976	476.188	616.861		7.52976
	7.63889	439.694	629.879		7.63889	458.337	641.127		7.63889	456.779	676.65		7.63889	525.788	847.115		7.63889	457.113	775.499		7.63889	464.037	764.917		7.63889	505.053	688.796		7.63889	490.138	682.679		7.63889	491.927	671.974		7.63889	440.674	548.492		7.63889	458.834	692.563		7.63889	440.795	613.742		7.63889
	7.74802	421.226	635.798		7.74802	470.634	646.183		7.74802	485.018	637.066		7.74802	513.803	842.356		7.74802	484.328	788.812		7.74802	456.483	776.648		7.74802	522.072	655.057		7.74802	478.559	688.362		7.74802	500.805	649.854		7.74802	444.893	562.69		7.74802	433.837	608.394		7.74802	444.203	610.636		7.74802
	7.85714	408.311	612.798		7.85714	484.242	656.019		7.85714	467.24	632.213		7.85714	508.537	803.011		7.85714	493.598	813.615		7.85714	447.858	757.81		7.85714	513.743	656.727		7.85714	481.49	655.32		7.85714	514.581	653.497		7.85714	444.232	565.393		7.85714	446.967	604.931		7.85714	439.62	624.3		7.85714
	7.96627	405.374	642.285		7.96627	470.782	659.05		7.96627	457.407	628.882		7.96627	515.23	747.589		7.96627	500.872	807.535		7.96627	449.708	728.719		7.96627	525.032	666.592		7.96627	463.419	666.695		7.96627	494.158	648.313		7.96627	452.423	565.634		7.96627	457.8	624.918		7.96627	440.082	612.57		7.96627
	8.0754	405.158	618.037		8.0754	433.979	703.803		8.0754	431.397	644.367		8.0754	484.222	728.432		8.0754	512.419	839.454		8.0754	447.291	707.629		8.0754	509.591	687.14		8.0754	464.816	669.29		8.0754	477.357	657.526		8.0754	446.624	577.844		8.0754	503.661	630.944		8.0754	428.773	627.303		8.0754
	8.18452	414.948	627.122		8.18452	436.369	754.405		8.18452	460.668	648.479		8.18452	502.842	729.62		8.18452	506.212	801.444		8.18452	454.673	625.955		8.18452	501.53	702.028		8.18452	479.254	672.418		8.18452	453.357	648.456		8.18452	445.703	568.024		8.18452	541.569	642.979		8.18452	394.497	600.036		8.18452
	8.29365	432.451	622.017		8.29365	418.123	834.988		8.29365	455.729	641.984		8.29365	490.889	726.397		8.29365	499.469	775.176		8.29365	456.901	657.83		8.29365	488.777	742.094		8.29365	485.058	664.344		8.29365	457.038	630.821		8.29365	454.635	606.408		8.29365	548.197	647.461
	8.40278	426.797	601.62		8.40278	414.608	891.051		8.40278	490.899	657.526		8.40278	498.523	697.164		8.40278	490.092	763.351		8.40278	454.543	671.183		8.40278	513.217	801.594		8.40278	519.631	686.938		8.40278	443.669	647.997		8.40278	466.982	628.844		8.40278	538.078	635.595
													8.5119	491.219	670.995		8.5119	498.903	718.096		8.5119	436.805	644.068		8.5119	513.99	815.31						8.5119	443.839	645.167		8.5119	461.081	617.442
													8.62103	483.038	646.739		8.62103	495.584	668.518		8.62103	463.398	654.373		8.62103	536.59	875.014						8.62103	443.797	646.589
													8.73016	482.731	642.893		8.73016	499.167	627.348		8.73016	468.869	637.983
													8.83929	483.512	667.376		8.83929	519.546	605.408
													8.94841	475.107	692.078
													9.05754	508.49	726.7
													9.16667	541.192	721.792
													9.27579	554.156	738.229
	min	387.818				405.051				407.192				475.107				453.26				436.805				488.777				463.419				428.392				440.674				433.837
	max	455.196				484.242				544.945				596.948				595.046				535.853				648.706				581.399				560.991				588.832				562.648
	t32				t33				t34				t35				t36				t37				t38				t39				t40				t41				t42				t43				t44
		Rab5	Rab11			Rab5	Rab11			Rab5	Rab11			Rab5	Rab11			Rab5	Rab11			Rab5	Rab11			Rab5	Rab11			Rab5	Rab11			Rab5	Rab11			Rab5	Rab11			Rab5	Rab11			Rab5	Rab11
	0	0.352746	0.0640396		0	0.275261	1		0	0.471116	0.200557		0	0.707862	0.140176		0	0.606709	0.0341238		0	0.440727	0.0147588		0	0.645808	0.645176		0	0.586614	0.115433		0	0.377227	0.105884		0	0.418914	0.30863		0	0.609557	0.0888127		0	0.217706	0.071601		0
	0.10913	0.257253	0.114608		0.10913	0.266751	0.668635		0.10913	0.544141	0.20493		0.10913	0.626664	0.081852		0.10913	0.511346	0.00768881		0.10913	0.458261	0.0246669		0.10913	0.665595	0.754003		0.10913	0.534754	0.152861		0.10913	0.400552	0.0914476		0.10913	0.502758	0.385781		0.10913	0.464245	0.048627		0.10913	0.207369	0.0386472		0.10913
	0.21825	0.23838	0.302623		0.21825	0.30244	0.470164		0.21825	0.52239	0.148457		0.21825	0.628314	0.116514		0.21825	0.535451	0.0798708		0.21825	0.472162	0.0172521		0.21825	0.609851	0.780665		0.21825	0.528637	0.206805		0.21825	0.377382	0.105143		0.21825	0.512661	0.42297		0.21825	0.526229	0.0915789		0.21825	0.23348	0.161515		0.21825
	0.32738	0.231907	0.287811		0.32738	0.275795	0.308117		0.32738	0.544163	0.1065		0.32738	0.636845	0.114343		0.32738	0.56217	0.132858		0.32738	0.572611	0.0822784		0.32738	0.604412	0.655478		0.32738	0.516979	0.236845		0.32738	0.368382	0.153952		0.32738	0.491312	0.38673		0.32738	0.533164	0.110307		0.32738	0.242436	0.288179		0.32738
	0.43651	0.234144	0.303007		0.43651	0.228107	0.272864		0.43651	0.484019	0.194574		0.43651	0.632385	0.13932		0.43651	0.518721	0.292659		0.43651	0.547583	0.137828		0.43651	0.661505	0.574416		0.43651	0.518398	0.194493		0.43651	0.41656	0.257132		0.43651	0.466085	0.481729		0.43651	0.532429	0.144035		0.43651	0.217269	0.420945		0.43651
	0.54563	0.173514	0.338645		0.54563	0.254087	0.163907		0.54563	0.432666	0.21274		0.54563	0.650851	0.164101		0.54563	0.548678	0.31442		0.54563	0.623851	0.20505		0.54563	0.616662	0.392495		0.54563	0.553322	0.155441		0.54563	0.399561	0.351622		0.54563	0.495554	0.502311		0.54563	0.560171	0.173273		0.54563	0.253017	0.432956		0.54563
	0.65476	0.183859	0.420643		0.65476	0.285014	0.164083		0.65476	0.45564	0.315627		0.65476	0.633715	0.191581		0.65476	0.546283	0.251046		0.65476	0.642484	0.269932		0.65476	0.660897	0.351667		0.65476	0.519013	0.20122		0.65476	0.410598	0.442361		0.65476	0.473321	0.54108		0.65476	0.56275	0.172717		0.65476	0.22678	0.47358		0.65476
	0.76389	0.23303	0.441448		0.76389	0.254366	0.177751		0.76389	0.522808	0.406422		0.76389	0.660276	0.324979		0.76389	0.566063	0.243903		0.76389	0.607365	0.333816		0.76389	0.644319	0.403302		0.76389	0.54097	0.150258		0.76389	0.452076	0.482661		0.76389	0.459578	0.459858		0.76389	0.571319	0.1287		0.76389	0.273206	0.281148		0.76389
	0.87302	0.203836	0.51993		0.87302	0.251149	0.279665		0.87302	0.50035	0.501396		0.87302	0.664347	0.267032		0.87302	0.558821	0.321419		0.87302	0.592149	0.375075		0.87302	0.653043	0.339504		0.87302	0.475127	0.155909		0.87302	0.385435	0.400846		0.87302	0.481117	0.482609		0.87302	0.568601	0.256899		0.87302	0.330528	0.292374		0.87302
	0.98214	0.233937	0.445151		0.98214	0.279698	0.331569		0.98214	0.451031	0.471443		0.98214	0.602482	0.266967		0.98214	0.620502	0.275267		0.98214	0.578031	0.398645		0.98214	0.604748	0.345702		0.98214	0.460684	0.165136		0.98214	0.396304	0.304953		0.98214	0.507985	0.475277		0.98214	0.586883	0.291616		0.98214	0.305022	0.413416		0.98214
	1.09127	0.286713	0.496759		1.09127	0.282668	0.340737		1.09127	0.510329	0.46806		1.09127	0.544173	0.203889		1.09127	0.616463	0.27907		1.09127	0.609751	0.368313		1.09127	0.615446	0.36094		1.09127	0.431298	0.16154		1.09127	0.456787	0.444359		1.09127	0.45175	0.457293		1.09127	0.540067	0.277973		1.09127	0.329577	0.518665		1.09127
	1.2004	0.230149	0.549024		1.2004	0.282349	0.404478		1.2004	0.536367	0.521536		1.2004	0.569789	0.255273		1.2004	0.572165	0.260376		1.2004	0.602851	0.31967		1.2004	0.596736	0.396034		1.2004	0.494705	0.26996		1.2004	0.455232	0.426388		1.2004	0.535971	0.424962		1.2004	0.519814	0.260766		1.2004	0.338508	0.434017		1.2004
	1.30952	0.246649	0.518211		1.30952	0.276441	0.522965		1.30952	0.599831	0.533286		1.30952	0.580665	0.208576		1.30952	0.544661	0.292175		1.30952	0.567846	0.314974		1.30952	0.618877	0.499248		1.30952	0.531989	0.301269		1.30952	0.49256	0.498205		1.30952	0.512927	0.372589		1.30952	0.490026	0.22424		1.30952	0.329796	0.368255		1.30952
	1.41865	0.243818	0.595725		1.41865	0.292429	0.56829		1.41865	0.671288	0.637457		1.41865	0.567191	0.197748		1.41865	0.545643	0.316703		1.41865	0.560918	0.315147		1.41865	0.707862	0.55086		1.41865	0.581362	0.424571		1.41865	0.499096	0.465203		1.41865	0.495316	0.342831		1.41865	0.516893	0.258113		1.41865	0.344606	0.434832		1.41865
	1.52778	0.31403	0.626295		1.52778	0.32373	0.67506		1.52778	0.657079	0.714895		1.52778	0.508134	0.190214		1.52778	0.530687	0.33904		1.52778	0.565401	0.299311		1.52778	0.683586	0.556724		1.52778	0.539604	0.644375		1.52778	0.507	0.470385		1.52778	0.534865	0.549767		1.52778	0.552023	0.331485		1.52778	0.376172	0.478136		1.52778
	1.6369	0.30814	0.654001		1.6369	0.421	0.568712		1.6369	0.606366	0.753836		1.6369	0.572713	0.193551		1.6369	0.502197	0.43784		1.6369	0.539299	0.332238		1.6369	0.771298	0.551393		1.6369	0.574237	0.940361		1.6369	0.571059	0.480261		1.6369	0.487808	0.620068		1.6369	0.630535	0.368878		1.6369	0.412179	0.557025		1.6369
	1.74603	0.263194	0.672524		1.74603	0.464564	0.575397		1.74603	0.532987	0.813673		1.74603	0.656667	0.206973		1.74603	0.481314	0.508652		1.74603	0.534849	0.331333		1.74603	0.702324	0.414866		1.74603	0.641974	1		1.74603	0.622998	0.479918		1.74603	0.550892	0.640963		1.74603	0.682404	0.478955		1.74603	0.591832	0.669889		1.74603
	1.85516	0.252271	0.799852		1.85516	0.420488	0.603835		1.85516	0.524376	0.743763		1.85516	0.630852	0.244838		1.85516	0.543016	0.599106		1.85516	0.546826	0.35638		1.85516	0.683646	0.42536		1.85516	0.613612	0.839403		1.85516	0.57673	0.459941		1.85516	0.485635	0.626509		1.85516	0.724782	0.507608		1.85516	0.847177	0.755472		1.85516
	1.96429	0.293777	0.778715		1.96429	0.463707	0.586309		1.96429	0.522649	0.762179		1.96429	0.68088	0.287292		1.96429	0.493282	0.667749		1.96429	0.55828	0.38734		1.96429	0.663818	0.438111		1.96429	0.712246	0.568174		1.96429	0.525836	0.482165		1.96429	0.540827	0.673261		1.96429	0.71633	0.591669		1.96429	1.17869	0.913803		1.96429
	2.07341	0.273911	0.814366		2.07341	0.468811	0.685778		2.07341	0.551807	0.824616		2.07341	0.64378	0.373158		2.07341	0.528894	0.686113		2.07341	0.61367	0.351964		2.07341	0.705176	0.466422		2.07341	0.786773	0.535139		2.07341	0.49838	0.582752		2.07341	0.550404	0.60822		2.07341	0.638556	0.676084		2.07341	1.30158	0.862481		2.07341
	2.18254	0.268513	0.871878		2.18254	0.452968	0.602629		2.18254	0.541844	0.86242		2.18254	0.674145	0.449437		2.18254	0.55648	0.612959		2.18254	0.555035	0.302298		2.18254	0.693714	0.446128		2.18254	0.732249	0.463749		2.18254	0.528434	0.511727		2.18254	0.534368	0.555832		2.18254	0.572244	0.859826		2.18254	1.27465	0.776224		2.18254
	2.29167	0.280558	0.86605		2.29167	0.402532	0.524431		2.29167	0.512205	0.922749		2.29167	0.671566	0.42108		2.29167	0.591686	0.589216		2.29167	0.598482	0.293782		2.29167	0.665582	0.398259		2.29167	0.66537	0.503584		2.29167	0.580088	0.545923		2.29167	0.627636	0.636995		2.29167	0.573831	1		2.29167	1.01	0.741284		2.29167
	2.40079	0.286223	0.861851		2.40079	0.362744	0.519772		2.40079	0.520974	0.931014		2.40079	0.628492	0.503625		2.40079	0.639545	0.567098		2.40079	0.558673	0.34758		2.40079	0.71391	0.364992		2.40079	0.599625	0.513337		2.40079	0.590831	0.515069		2.40079	0.603078	0.608441		2.40079	0.531903	0.933324		2.40079	0.750066	0.692447		2.40079
	2.50992	0.267941	0.81864		2.50992	0.380568	0.564854		2.50992	0.445256	0.976261		2.50992	0.604481	0.593516		2.50992	0.573378	0.554994		2.50992	0.52265	0.365177		2.50992	0.649974	0.417514		2.50992	0.650588	0.564043		2.50992	0.573885	0.61082		2.50992	0.686937	0.681013		2.50992	0.495709	0.806436		2.50992	0.512065	0.624708		2.50992
	2.61905	0.275765	0.806504		2.61905	0.372946	0.618992		2.61905	0.442196	1		2.61905	0.640432	0.560011		2.61905	0.522558	0.550239		2.61905	0.553743	0.330579		2.61905	0.632407	0.518439		2.61905	0.596555	0.595332		2.61905	0.5107	0.544059		2.61905	0.705096	0.614271		2.61905	0.465797	0.72867		2.61905	0.402827	0.650641		2.61905
	2.72817	0.273465	0.787696		2.72817	0.347505	0.651129		2.72817	0.440887	0.912238		2.72817	0.670214	0.582239		2.72817	0.558695	0.46489		2.72817	0.522245	0.349234		2.72817	0.654935	0.494353		2.72817	0.587767	0.506158		2.72817	0.491568	0.469889		2.72817	0.690115	0.632991		2.72817	0.521173	0.70612		2.72817	0.402026	0.781898		2.72817
	2.8373	0.244991	0.78746		2.8373	0.340125	0.622058		2.8373	0.420378	0.92933		2.8373	0.630215	0.602071		2.8373	0.577988	0.490082		2.8373	0.534723	0.275141		2.8373	0.711185	0.489206		2.8373	0.585382	0.483386		2.8373	0.440738	0.423392		2.8373	0.705176	0.816046		2.8373	0.472735	0.673905		2.8373	0.344258	0.596512		2.8373
	2.94643	0.315515	0.705564		2.94643	0.349526	0.603311		2.94643	0.426191	0.944459		2.94643	0.629087	0.557193		2.94643	0.597502	0.589442		2.94643	0.530435	0.306567		2.94643	0.740891	0.51108		2.94643	0.646444	0.574666		2.94643	0.520096	0.350003		2.94643	0.682483	0.994707		2.94643	0.427087	0.635787		2.94643	0.346022	0.634637		2.94643
	3.05556	0.243796	0.811958		3.05556	0.321467	0.662017		3.05556	0.466358	0.926703		3.05556	0.685027	0.495546		3.05556	0.573442	0.643626		3.05556	0.446797	0.342539		3.05556	0.755714	0.540384		3.05556	0.622127	0.532379		3.05556	0.501611	0.39212		3.05556	0.575659	1		3.05556	0.458235	0.517951		3.05556	0.36177	0.725199		3.05556
	3.16468	0.244315	0.843785		3.16468	0.35852	0.626197		3.16468	0.494483	0.791666		3.16468	0.64512	0.458045		3.16468	0.543593	0.726424		3.16468	0.464477	0.409116		3.16468	0.760523	0.536027		3.16468	0.595488	0.581127		3.16468	0.517942	0.393511		3.16468	0.569935	0.943494		3.16468	0.426071	0.473838		3.16468	0.370539	0.810717		3.16468
	3.27381	0.26752	0.999275		3.27381	0.291564	0.614494		3.27381	0.515043	0.821751		3.27381	0.608695	0.387897		3.27381	0.541081	0.829672		3.27381	0.481779	0.538841		3.27381	0.701672	0.559382		3.27381	0.633072	0.594748		3.27381	0.538733	0.427077		3.27381	0.61594	0.855617		3.27381	0.322098	0.422746		3.27381	0.347673	0.855339		3.27381
	3.38294	0.247048	1		3.38294	0.324575	0.663184		3.38294	0.52941	0.812774		3.38294	0.682243	0.456814		3.38294	0.537827	0.8093		3.38294	0.466242	0.55711		3.38294	0.691477	0.68386		3.38294	0.609259	0.664919		3.38294	0.597895	0.549478		3.38294	0.630833	0.856814		3.38294	0.406505	0.485807		3.38294	0.362914	0.678535		3.38294
	3.49206	0.236554	0.947532		3.49206	0.32177	0.643379		3.49206	0.500917	0.80565		3.49206	0.710932	0.390332		3.49206	0.629569	0.870124		3.49206	0.457168	0.562056		3.49206	0.72176	0.875437		3.49206	0.656987	0.575051		3.49206	0.666219	0.671701		3.49206	0.605527	0.853681		3.49206	0.346678	0.552181		3.49206	0.487615	0.797761		3.49206
	3.60119	0.330669	0.92142		3.60119	0.344606	0.619617		3.60119	0.465493	0.856202		3.60119	0.635756	0.426777		3.60119	0.622197	0.826451		3.60119	0.480685	0.45733		3.60119	0.795957	0.822431		3.60119	0.639624	0.544151		3.60119	0.722121	0.803839		3.60119	0.599257	0.770008		3.60119	0.406378	0.586261		3.60119	0.486097	0.812176		3.60119
	3.71032	0.290054	0.846822		3.71032	0.335929	0.566651		3.71032	0.53254	0.803504		3.71032	0.613602	0.520016		3.71032	0.630351	0.716178		3.71032	0.538943	0.464303		3.71032	0.758575	0.969875		3.71032	0.557313	0.509618		3.71032	0.702594	0.945898		3.71032	0.614226	0.696648		3.71032	0.361789	0.673693		3.71032	0.532866	0.803882		3.71032
	3.81944	0.33596	0.903045		3.81944	0.3396	0.534911		3.81944	0.595342	0.717606		3.81944	0.620578	0.521675		3.81944	0.767578	0.676988		3.81944	0.548655	0.495996		3.81944	0.859114	0.958999		3.81944	0.638686	0.572733		3.81944	0.691458	1		3.81944	0.593276	0.763777		3.81944	0.388315	0.7425		3.81944	0.567369	0.765858		3.81944
	3.92857	0.279018	0.7302		3.92857	0.375529	0.535632		3.92857	0.617584	0.900364		3.92857	0.609123	0.465388		3.92857	0.830006	0.611556		3.92857	0.556396	0.615864		3.92857	0.880368	0.985898		3.92857	0.580589	0.438656		3.92857	0.699723	0.954174		3.92857	0.586291	0.766324		3.92857	0.435378	0.692236		3.92857	0.548259	0.739865		3.92857
	4.0377	0.259534	0.708345		4.0377	0.34601	0.514444		4.0377	0.630332	0.81608		4.0377	0.68638	0.435417		4.0377	0.79514	0.682744		4.0377	0.545514	0.74899		4.0377	1	1		4.0377	0.589532	0.463941		4.0377	0.697205	0.808076		4.0377	0.629626	0.783877		4.0377	0.419896	0.571539		4.0377	0.535502	0.79512		4.0377
	4.14683	0.220871	0.740978		4.14683	0.361865	0.537341		4.14683	0.607624	0.818611		4.14683	0.702397	0.331005		4.14683	0.751704	0.720531		4.14683	0.584797	0.869827		4.14683	0.976788	0.911867		4.14683	0.567739	0.406664		4.14683	0.673255	0.569541		4.14683	0.595709	0.754825		4.14683	0.445779	0.507415		4.14683	0.515642	0.820741		4.14683
	4.25595	0.310532	0.813264		4.25595	0.369489	0.459456		4.25595	0.592662	0.726935		4.25595	0.685379	0.3609		4.25595	0.75076	0.671697		4.25595	0.590177	1		4.25595	0.844592	0.797323		4.25595	0.638198	0.472764		4.25595	0.717727	0.502166		4.25595	0.619909	0.764572		4.25595	0.504133	0.45516		4.25595	0.554896	0.854248		4.25595
	4.36508	0.294434	0.787798		4.36508	0.350304	0.459438		4.36508	0.600201	0.620347		4.36508	0.720762	0.336047		4.36508	0.692051	0.707721		4.36508	0.589873	0.956184		4.36508	0.802933	0.645777		4.36508	0.648637	0.392213		4.36508	0.602771	0.500542		4.36508	0.633221	0.677814		4.36508	0.554994	0.481568		4.36508	0.497486	0.901169		4.36508
	4.47421	0.265594	0.722689		4.47421	0.379637	0.419585		4.47421	0.585169	0.498872		4.47421	0.770176	0.392266		4.47421	0.646416	0.770147		4.47421	0.609831	0.807349		4.47421	0.710023	0.514234		4.47421	0.62207	0.377311		4.47421	0.541252	0.538305		4.47421	0.587846	0.71528		4.47421	0.66894	0.482385		4.47421	0.45117	0.968384		4.47421
	4.58333	0.23549	0.736052		4.58333	0.343643	0.425169		4.58333	0.5658	0.515534		4.58333	0.776363	0.397081		4.58333	0.632201	0.841227		4.58333	0.625702	0.637281		4.58333	0.640039	0.43104		4.58333	0.690289	0.372944		4.58333	0.569466	0.478409		4.58333	0.63957	0.633009		4.58333	0.703978	0.443326		4.58333	0.406236	1		4.58333
	4.69246	0.264965	0.73967		4.69246	0.303376	0.437956		4.69246	0.59767	0.493321		4.69246	0.747702	0.396558		4.69246	0.666263	0.968702		4.69246	0.627872	0.519509		4.69246	0.618113	0.395081		4.69246	0.764138	0.328155		4.69246	0.588119	0.440745		4.69246	0.600189	0.656521		4.69246	0.591423	0.399459		4.69246	0.425953	0.97281		4.69246
	4.80159	0.334143	0.710234		4.80159	0.266744	0.402055		4.80159	0.584491	0.540205		4.80159	0.795634	0.393389		4.80159	0.667157	1		4.80159	0.583855	0.432646		4.80159	0.646581	0.378016		4.80159	0.754738	0.237426		4.80159	0.527683	0.508972		4.80159	0.534184	0.647092		4.80159	0.437418	0.385864		4.80159	0.529587	0.88273		4.80159
	4.91071	0.310273	0.567336		4.91071	0.31443	0.37035		4.91071	0.547046	0.635124		4.91071	0.742722	0.387705		4.91071	0.638775	0.95166		4.91071	0.49586	0.407735		4.91071	0.626581	0.360481		4.91071	0.697392	0.166604		4.91071	0.456027	0.597385		4.91071	0.596596	0.698871		4.91071	0.509201	0.329174		4.91071	0.57048	0.809208		4.91071
	5.01984	0.311597	0.451373		5.01984	0.286733	0.357623		5.01984	0.562046	0.808666		5.01984	0.79934	0.433852		5.01984	0.627801	0.916721		5.01984	0.492076	0.385406		5.01984	0.574813	0.315186		5.01984	0.694585	0.145659		5.01984	0.445652	0.737362		5.01984	0.711854	0.675359		5.01984	0.430157	0.326831		5.01984	0.639535	0.647784		5.01984
	5.12897	0.345495	0.419334		5.12897	0.358705	0.45813		5.12897	0.508777	0.795584		5.12897	0.793597	0.548514		5.12897	0.631064	0.847346		5.12897	0.474618	0.381595		5.12897	0.600087	0.270924		5.12897	0.652644	0.0290374		5.12897	0.47831	0.787925		5.12897	0.810321	0.586489		5.12897	0.441435	0.342417		5.12897	0.593422	0.649348		5.12897
	5.2381	0.386966	0.448057		5.2381	0.337296	0.428306		5.2381	0.478919	0.434185		5.2381	0.618817	0.602789		5.2381	0.600138	0.558794		5.2381	0.491623	0.3703		5.2381	0.545823	0.273321		5.2381	0.578295	0.0547478		5.2381	0.490216	0.707276		5.2381	0.701824	0.542803		5.2381	0.568959	0.307869		5.2381	0.544657	0.649167		5.2381
	5.34722	0.38654	0.415969		5.34722	0.396163	0.497118		5.34722	0.488822	0.315906		5.34722	0.711879	0.545949		5.34722	0.528184	0.481664		5.34722	0.530344	0.363722		5.34722	0.581266	0.251345		5.34722	0.569089	0.0629692		5.34722	0.455162	0.434226		5.34722	0.629873	0.538673		5.34722	0.587466	0.287517		5.34722	0.587042	0.661691		5.34722
	5.45635	0.350319	0.319135		5.45635	0.379232	0.35365		5.45635	0.439525	0.241241		5.45635	0.603037	0.500434		5.45635	0.562804	0.333353		5.45635	0.468329	0.351262		5.45635	0.562145	0.254829		5.45635	0.599017	0.0994644		5.45635	0.405292	0.245695		5.45635	0.61919	0.607874		5.45635	0.562617	0.257447		5.45635	0.507937	0.738694		5.45635
	5.56548	0.315052	0.280713		5.56548	0.348892	0.333764		5.56548	0.433062	0.274066		5.56548	0.620873	0.530551		5.56548	0.54915	0.252151		5.56548	0.534088	0.343313		5.56548	0.554149	0.186827		5.56548	0.590967	0.033779		5.56548	0.446339	0.233265		5.56548	0.5819	0.628438		5.56548	0.525184	0.247318		5.56548	0.465597	0.736732		5.56548
	5.6746	0.285343	0.314149		5.6746	0.320161	0.297364		5.6746	0.361678	0.254931		5.6746	0.673993	0.62239		5.6746	0.50591	0.283335		5.6746	0.573196	0.328779		5.6746	0.648627	0.21211		5.6746	0.6671	0.015397		5.6746	0.399913	0.144951		5.6746	0.516637	0.599747		5.6746	0.486224	0.238039		5.6746	0.43246	0.637881		5.6746
	5.78373	0.287772	0.289257		5.78373	0.36566	0.227567		5.78373	0.345373	0.213276		5.78373	0.727798	0.700051		5.78373	0.500464	0.214489		5.78373	0.608858	0.272144		5.78373	0.611315	0.156671		5.78373	0.645095	0.0517627		5.78373	0.395043	0.113545		5.78373	0.495041	0.525986		5.78373	0.543324	0.245147		5.78373	0.453353	0.436884		5.78373
	5.89286	0.284928	0.240476		5.89286	0.356232	0.19788		5.89286	0.312381	0.112601		5.89286	0.760457	0.851234		5.89286	0.516792	0.182291		5.89286	0.556495	0.233889		5.89286	0.579508	0.225738		5.89286	0.555685	0.0547444		5.89286	0.302051	0.0880465		5.89286	0.552314	0.530498		5.89286	0.58962	0.260663		5.89286	0.440241	0.396295		5.89286
	6.00198	0.263556	0.276442		6.00198	0.364025	0.220108		6.00198	0.311944	0.0601964		6.00198	0.836032	1		6.00198	0.544882	0.198012		6.00198	0.532449	0.22383		6.00198	0.599679	0.231153		6.00198	0.564353	0.111279		6.00198	0.372259	0.000240403		6.00198	0.569377	0.422205		6.00198	0.587324	0.22936		6.00198	0.409841	0.41414		6.00198
	6.11111	0.252682	0.174019		6.11111	0.328152	0.116908		6.11111	0.25877	0.135478		6.11111	0.823012	0.940378		6.11111	0.505355	0.174861		6.11111	0.437882	0.188681		6.11111	0.582017	0.309219		6.11111	0.583408	0.163167		6.11111	0.415227	0.0192756		6.11111	0.552156	0.375162		6.11111	0.575593	0.275876		6.11111	0.401642	0.479107		6.11111
	6.22024	0.185561	0.189396		6.22024	0.345186	0.070929		6.22024	0.29281	0.102791		6.22024	0.801868	0.749276		6.22024	0.468091	0.161311		6.22024	0.449409	0.146419		6.22024	0.552451	0.36452		6.22024	0.589605	0.145054		6.22024	0.410291	0.0732085		6.22024	0.570293	0.360634		6.22024	0.657482	0.252295		6.22024	0.390383	0.401496		6.22024
	6.32937	0.239369	0.148478		6.32937	0.322313	0.0425644		6.32937	0.314127	0.0586336		6.32937	0.740942	0.545024		6.32937	0.479704	0.210996		6.32937	0.490354	0.133045		6.32937	0.574005	0.255497		6.32937	0.584533	0.17289		6.32937	0.411498	0.069035		6.32937	0.631089	0.264461		6.32937	0.710048	0.243902		6.32937	0.388334	0.386769		6.32937
	6.43849	0.275795	0.145831		6.43849	0.312174	0		6.43849	0.304449	0.140412		6.43849	0.689108	0.49645		6.43849	0.488815	0.179587		6.43849	0.472641	0.105748		6.43849	0.530085	0.167554		6.43849	0.619757	0.144603		6.43849	0.465382	0.240765		6.43849	0.640669	0.21648		6.43849	0.72737	0.353659		6.43849	0.416899	0.400611		6.43849
	6.54762	0.285856	0.197498		6.54762	0.287217	0.135025		6.54762	0.331503	0.0394657		6.54762	0.630015	0.488991		6.54762	0.502976	0.11144		6.54762	0.511542	0.0543329		6.54762	0.54677	0.0790413		6.54762	0.644468	0.1308		6.54762	0.45859	0.14274		6.54762	0.638239	0.269467		6.54762	0.698805	0.451074		6.54762	0.441017	0.352815		6.54762
	6.65675	0.294532	0.276294		6.65675	0.356297	0.0416642		6.65675	0.344768	0.0533767		6.65675	0.654618	0.404161		6.65675	0.589725	0.0571706		6.65675	0.503338	0.043362		6.65675	0.515091	0.0504347		6.65675	0.629195	0.150766		6.65675	0.473673	0.194352		6.65675	0.5911	0.256081		6.65675	0.657241	0.54689		6.65675	0.470299	0.376011		6.65675
	6.76587	0.222567	0.181442		6.76587	0.340701	0.117274		6.76587	0.304404	0.0849771		6.76587	0.600594	0.333936		6.76587	0.574135	0.0149394		6.76587	0.43313	0.0463983		6.76587	0.540061	0		6.76587	0.65604	0.154079		6.76587	0.433376	0.314175		6.76587	0.543748	0.175602		6.76587	0.519146	0.703914		6.76587	0.567049	0.358221		6.76587
	6.875	0.297253	0.179094		6.875	0.346896	0.174252		6.875	0.23489	0.00285776		6.875	0.532305	0.227082		6.875	0.522884	0.126468		6.875	0.433368	0.0327023		6.875	0.535686	0.0358766		6.875	0.634783	0.151101		6.875	0.401094	0.235177		6.875	0.540485	0.0996437		6.875	0.467786	0.665011		6.875	0.64596	0.223243		6.875
	6.98413	0.293526	0.155254		6.98413	0.323397	0.152045		6.98413	0.287339	0		6.98413	0.611533	0.197223		6.98413	0.485467	0.0169834		6.98413	0.509801	0.0687309		6.98413	0.554532	0.106509		6.98413	0.644556	0.200433		6.98413	0.414694	0.216366		6.98413	0.530297	0.117083		6.98413	0.497309	0.597019		6.98413	0.682616	0.239096		6.98413
	7.09325	0.234628	0.210034		7.09325	0.351391	0.100356		7.09325	0.26707	0.092692		7.09325	0.59129	0.20854		7.09325	0.471309	0.0209243		7.09325	0.489282	0.029689		7.09325	0.61498	0.119535		7.09325	0.635094	0.140714		7.09325	0.484092	0.110759		7.09325	0.495928	0.0472711		7.09325	0.384405	0.504096		7.09325	0.774231	0.24062		7.09325
	7.20238	0.280202	0.280411		7.20238	0.310058	0.077315		7.20238	0.277508	0.144047		7.20238	0.60068	0.140965		7.20238	0.4531	0.0486282		7.20238	0.435674	0.0397546		7.20238	0.570895	0.16851		7.20238	0.628476	0.261174		7.20238	0.491765	0.0879755		7.20238	0.447999	0.0120653		7.20238	0.343884	0.446671		7.20238	0.787967	0.153764		7.20238
	7.31151	0.312099	0.244098		7.31151	0.268672	0.0951897		7.31151	0.328396	0.241384		7.31151	0.647205	0.205847		7.31151	0.461593	0.10782		7.31151	0.463202	0.0793181		7.31151	0.542142	0.190096		7.31151	0.604127	0.21501		7.31151	0.511638	0.0611568		7.31151	0.403762	0.027042		7.31151	0.358346	0.464149		7.31151	0.70867	0.128657		7.31151
	7.42063	0.340465	0.184778		7.42063	0.320505	0.0656155		7.42063	0.369348	0.208829		7.42063	0.568943	0.310522		7.42063	0.416342	0.202149		7.42063	0.460134	0.123688		7.42063	0.550667	0.155437		7.42063	0.570891	0.227083		7.42063	0.466462	0.0502363		7.42063	0.397895	0		7.42063	0.376691	0.446042		7.42063	0.589684	0.144977		7.42063
	7.52976	0.31227	0.0996904		7.52976	0.419993	0.124905		7.52976	0.352228	0.194882		7.52976	0.572634	0.361868		7.52976	0.380832	0.425488		7.52976	0.436924	0.155186		7.52976	0.553046	0.122048		7.52976	0.592522	0.0477217		7.52976	0.472995	0.119019		7.52976	0.359214	0.0564802		7.52976	0.417514	0.382373		7.52976	0.453467	0.0846226		7.52976
	7.63889	0.337854	0.0926908		7.63889	0.396917	0.0501672		7.63889	0.39198	0.226842		7.63889	0.610599	0.402999		7.63889	0.393038	0.556273		7.63889	0.414972	0.245735		7.63889	0.544911	0.123248		7.63889	0.49766	0.0908445		7.63889	0.503328	0.162185		7.63889	0.34096	0.0119623		7.63889	0.39849	0.231742		7.63889	0.341343	0.0689353		7.63889
	7.74802	0.279347	0.112105		7.74802	0.435873	0.0679469		7.74802	0.48144	0.0816278		7.74802	0.572631	0.393608		7.74802	0.479255	0.599812		7.74802	0.391041	0.26648		7.74802	0.598827	0.0372731		7.74802	0.460978	0.109715		7.74802	0.531453	0.0750096		7.74802	0.354325	0.0642207		7.74802	0.3193	0.00915789		7.74802	0.352139	0.0533135		7.74802
	7.85714	0.238433	0.0366643		7.85714	0.478982	0.102536		7.85714	0.42512	0.0638246		7.85714	0.555948	0.315967		7.85714	0.508622	0.680929		7.85714	0.363717	0.233167		7.85714	0.572441	0.0415286		7.85714	0.470264	0		7.85714	0.575095	0.0893667		7.85714	0.352231	0.0741696		7.85714	0.360896	0		7.85714	0.337621	0.122038		7.85714
	7.96627	0.22913	0.133383		7.96627	0.436341	0.113194		7.96627	0.393969	0.0516048		7.96627	0.577151	0.2066		7.96627	0.531665	0.661045		7.96627	0.36958	0.181724		7.96627	0.608204	0.066667		7.96627	0.413015	0.0377702		7.96627	0.510396	0.0689364		7.96627	0.37818	0.0750567		7.96627	0.395214	0.0528555		7.96627	0.339084	0.0630407		7.96627
	8.0754	0.228444	0.0538485		8.0754	0.319752	0.270571		8.0754	0.31157	0.108412		8.0754	0.478919	0.168797		8.0754	0.568246	0.765434		8.0754	0.361923	0.144429		8.0754	0.559287	0.119028		8.0754	0.417441	0.0463868		8.0754	0.457171	0.105245		8.0754	0.359809	0.119998		8.0754	0.540501	0.0687913		8.0754	0.303258	0.137141		8.0754
	8.18452	0.259461	0.0836477		8.18452	0.327321	0.448516		8.18452	0.4043	0.123496		8.18452	0.537906	0.171142		8.18452	0.548582	0.641125		8.18452	0.385308	0		8.18452	0.53375	0.156966		8.18452	0.46318	0.0567732		8.18452	0.381139	0.0695		8.18452	0.356891	0.0838535		8.18452	0.660593	0.100618		8.18452	0.194672	0		8.18452
	8.29365	0.314909	0.066903		8.29365	0.269518	0.731891		8.29365	0.388654	0.0996695		8.29365	0.50004	0.164781		8.29365	0.527221	0.555217		8.29365	0.392366	0.0563665		8.29365	0.493349	0.259064		8.29365	0.481567	0.0299638		8.29365	0.3928	0		8.29365	0.385188	0.225133		8.29365	0.68159	0.11247
	8.40278	0.296998	0		8.40278	0.258384	0.929039		8.40278	0.500071	0.156685		8.40278	0.524224	0.107095		8.40278	0.497515	0.516544		8.40278	0.384897	0.0799795		8.40278	0.570774	0.410684		8.40278	0.591094	0.104986		8.40278	0.350448	0.0676911		8.40278	0.424303	0.307713		8.40278	0.649533	0.0810908
													8.5119	0.501085	0.0554547		8.5119	0.525428	0.36854		8.5119	0.328704	0.0320303		8.5119	0.573223	0.445636						8.5119	0.350986	0.056538		8.5119	0.405609	0.265746
													8.62103	0.475168	0.00758945		8.62103	0.514913	0.206398		8.62103	0.412949	0.0502533		8.62103	0.644819	0.597776						8.62103	0.350853	0.0621421
													8.73016	0.474195	0		8.73016	0.526264	0.0717535		8.73016	0.43028	0.0212699
													8.83929	0.476669	0.0483132		8.83929	0.590824	0
													8.94841	0.450043	0.0970585
													9.05754	0.555799	0.165379
													9.16667	0.659398	0.155694
													9.27579	0.700468	0.18813
[truncated: 17 more columns]
