# Supplementary material for: A novel live-cell imaging assay reveals regulation of endosome maturation
Source: eLife. 2021 Nov 30;10:e70982. doi: 10.7554/eLife.70982 (PMC8635980; doi:10.7554/eLife.70982)
Supplement: Figure 8—source data 1. [file elife-70982-fig8-data1.xlsx]

## Sheet: exp1-endosome1
endosome 1						dMFI			%dMFI
frame #	Rab5(rim)	Rab5(background)	Rab11(rim)	Rab11(background)		Rab5	Rab11			Rab5	Rab11
1	378.371	377.82	1320.9	1176.41		0.551	144.484		1	0.348457	1
2	355.66	389.5	1198.1	1185.09		-33.84	13.004		2	0	0.455105
3	375.06	377.657	1182.1	1170.25		-2.597	11.845		3	0.316561	0.450301
4	377.56	370.517	1113.7	1136.91		7.043	-23.215		4	0.414236	0.305001
5	381.698	373.953	1138.47	1159.02		7.745	-20.549		5	0.421349	0.31605
6	386.526	374.413	1148.91	1192.98		12.113	-44.063		6	0.465606	0.218601
7	390.802	383.959	1190.15	1156.25		6.843	33.905		7	0.412209	0.541725
8	390.948	382.169	1221.16	1194.09		8.779	27.071		8	0.431825	0.513403
9	401.319	395.878	1250.97	1233.24		5.441	17.736		9	0.398004	0.474715
10	383.397	385.727	1289.07	1327.62		-2.33	-38.547		10	0.319266	0.241461
11	402.224	409.035	1413.22	1408.14		-6.811	5.079		11	0.273864	0.422261
12	396.681	395.047	1258.1	1256.72		1.634	1.374		12	0.359431	0.406906
13	400.379	405.826	1242.14	1222.48		-5.447	19.661		13	0.287684	0.482693
14	394.129	390.372	1429.52	1381.88		3.757	47.633		14	0.380941	0.598618
15	417.5	401.841	1262.8	1238.9		15.659	23.902		15	0.501535	0.500269
16	428.741	406.39	1186.86	1248.19		22.351	-61.324		16	0.56934	0.147065
17	427.81	401.017	1268.65	1229.3		26.793	39.35		17	0.614347	0.564291
18	454.274	417.261	1273.46	1249.48		37.013	23.983		18	0.717899	0.500605
19	452.685	416.608	1207.47	1275.76		36.077	-68.293		19	0.708415	0.118184
20	428.218	415.648	1214.23	1257.71		12.57	-43.476		20	0.470237	0.221033
21	427.669	414.017	1224.37	1214.84		13.652	9.53		21	0.4812	0.440707
22	417.113	398.801	1286.02	1318.28		18.312	-32.268		22	0.528416	0.267483
23	418.137	401.148	1315.95	1292.84		16.989	23.111		23	0.515011	0.496991
24	404.742	383.933	1320.95	1240.26		20.809	80.692		24	0.553716	0.735625
25	399.226	398.597	1495.98	1392.17		0.629	103.806		25	0.349248	0.831417
26	421.427	398.318	1281.78	1259.76		23.109	22.026		26	0.57702	0.492495
27	438.169	403.125	1372.81	1355.52		35.044	17.291		27	0.697948	0.472871
28	445.296	400.236	1351.12	1447.93		45.06	-96.81		28	0.799433	0
29	469.975	405.12	1427.86	1418.82		64.855	9.032		29	1	0.438643
30	455.175	401.644	1402.19	1422.9		53.531	-20.704		30	0.885263	0.315408
31	444.519	395.92	1254.47	1325.34		48.599	-70.867		31	0.835291	0.107516
32	410.968	387.25	1268.81	1307.44		23.718	-38.625		32	0.583191	0.241137
33	399.037	378.055	1343.73	1304.24		20.982	39.487		33	0.555469	0.564859
34	403.644	388.903	1415.29	1365.93		14.741	49.363		34	0.492234	0.605788
35	375.372	373.723	1334.94	1361.9		1.649	-26.966		35	0.359583	0.289456
36	377.665	376.436	1235.04	1260.02		1.229	-24.981		36	0.355327	0.297682
37	376.28	372.627	1201.18	1195.69		3.653	5.488		37	0.379888	0.423956
38	359.591	368.364	1181.1	1171.62		-8.773	9.486		38	0.253984	0.440525
39	360.165	370.045	1213.8	1194.54		-9.88	19.258		39	0.242768	0.481023
40	357.738	373.264	1119.94	1172.61		-15.526	-52.675		40	0.185562	0.18291
41	355.628	370.623	1241.97	1248.95		-14.995	-6.985		41	0.190942	0.372264
42	356.615	376.868	1197.92	1257.71		-20.253	-59.791		42	0.137667	0.153419
43	347.654	362.722	1187.58	1202.55		-15.068	-14.964		43	0.190202	0.339196
44	356.487	372.991	1291.33	1205.08		-16.504	86.247		44	0.175652	0.758647
45	362.147	380.439	1203.56	1204.08		-18.292	-0.522		45	0.157536	0.399048
46	344.199	357.061	1170.72	1255.51		-12.862	-84.785		46	0.212554	0.0498355
47	347.705	362.283	1188.05	1233.76		-14.578	-45.719		47	0.195167	0.211738
48	348.859	366.297	1202.03	1249.14		-17.438	-47.11		48	0.166189	0.205973
49	357.878	375.642	1287.58	1364.95		-17.764	-77.365		49	0.162886	0.0805863
50	368.135	383.368	1361.15	1395.35		-15.233	-34.2		50	0.18853	0.259476
51	354.744	372.844	1321.78	1362.8		-18.1	-41.02		51	0.159481	0.231212
52	350.212	365.887	1324.89	1327.93		-15.675	-3.043		52	0.184052	0.388601
53	364.436	375.58	1352.45	1393.15		-11.144	-40.697		53	0.229961	0.23255
54	364.288	378.349	1443.11	1390.99		-14.061	52.123		54	0.200405	0.617226
55	350.138	377.962	1389.24	1370.89		-27.824	18.354		55	0.0609555	0.477277

## Sheet: exp1-endosome2
endosome 2						dMFI			%dMFI
frame #	Rab5(rim)	Rab5(background)	Rab11(rim)	Rab11(background)		Rab5	Rab11			Rab5	Rab11
65	274.543	278.192	331.81	337.279		-3.649	-5.469		65	0.206023	0.155423
66	268.414	274.297	319.379	316.64		-5.883	2.739		66	0.159495	0.265923
67	279.086	279.576	342.586	309.36		-0.49	33.226		67	0.271817	0.676351
68	274.905	282.052	329.147	328.209		-7.147	0.938		68	0.133169	0.241677
69	277.137	283.341	330.718	343.767		-6.204	-13.049		69	0.15281	0.0533784
70	270.815	279.807	329.806	326.312		-8.992	3.494		70	0.0947432	0.276087
71	266.315	272.761	308.685	307.193		-6.446	1.492		71	0.147769	0.249135
72	266.629	280.17	309.685	326.699		-13.541	-17.014		72	0	0
73	267.667	272.288	331.008	320.522		-4.621	10.486		73	0.185779	0.370216
74	275.667	276.141	333.606	323.984		-0.474	9.622		74	0.27215	0.358584
75	274.432	280.38	335.742	335.647		-5.948	0.095		75	0.158141	0.230328
76	270.765	277.049	320.864	316.957		-6.284	3.907		76	0.151143	0.281647
77	275.826	278.359	327.371	332.125		-2.533	-4.754		77	0.229266	0.165049
78	270.802	279.779	321.56	314.36		-8.977	7.2		78	0.0950556	0.325978
79	269.903	272.858	325.581	318.92		-2.955	6.661		79	0.220477	0.318722
80	271	275.165	377.556	353.415		-4.165	24.141		80	0.195276	0.554045
81	279.968	281.648	350.177	341.125		-1.68	9.052		81	0.247032	0.350911
82	281.177	286.369	366.065	361.858		-5.192	4.207		82	0.173887	0.285685
83	279.605	279.972	350.524	360.477		-0.367	-9.953		83	0.274378	0.095058
84	275.242	281.114	363.411	375.693		-5.872	-12.282		84	0.159724	0.063704
85	269.458	275.216	402.625	345.358		-5.758	57.267		85	0.162099	1
86	278.661	279.028	369.306	347.148		-0.367	22.158		86	0.274378	0.527349
87	263.806	268.199	361.073	325.142		-4.393	35.931		87	0.190528	0.712766
88	267.347	271.688	333.661	328.58		-4.341	5.081		88	0.191611	0.297452
89	265.04	266.443	304.25	315.642		-1.403	-11.392		89	0.252801	0.0756856
90	265.847	271.165	311.395	318.011		-5.318	-6.616		90	0.171263	0.139982
91	266.379	266.223	297.098	295.011		0.156	2.087		91	0.285271	0.257145
92	264.333	261.946	302.909	294.783		2.387	8.126		92	0.331737	0.338445
93	277.508	272.424	317.333	296.734		5.084	20.599		93	0.387908	0.506361
94	299.576	271.745	319.242	300.283		27.831	18.959		94	0.861665	0.484283
95	311.265	282.082	295.28	290.473		29.183	4.807		95	0.889824	0.293763
96	321.598	287.125	295.826	295.603		34.473	0.223		96	1	0.232051
97	306.667	282.918	320.591	306.38		23.749	14.211		97	0.776648	0.420363
98	306.03	281.186	335.364	305.59		24.844	29.774		98	0.799454	0.629878
99	313.772	291.911	338.993	319.359		21.861	19.634		99	0.737327	0.49337
100	310.507	284.958	346.471	337.302		25.549	9.169		100	0.814138	0.352486
101	307.106	288.835	329.697	329.75		18.271	-0.053		101	0.662557	0.228336
102	320.007	294.818	341.118	344.109		25.189	-2.991		102	0.80664	0.188783
103	318.824	291.208	344.728	333.526		27.616	11.202		103	0.857187	0.379855
104	300.912	283.724	339.037	315.172		17.188	23.865		104	0.640001	0.550329
105	293.346	275.021	327.529	324.542		18.325	2.987		105	0.663681	0.269261
106	293.89	276.255	366.647	327.734		17.635	38.913		106	0.649311	0.752911
107	282.924	274.239	357.72	327.168		8.685	30.552		107	0.462907	0.640352
108	300.478	281.672	369.596	335.802		18.806	33.794		108	0.673699	0.683997
109	292.14	280.562	357.706	331.292		11.578	26.414		109	0.52316	0.584645
110	290.242	275.784	352.452	333.409		14.458	19.043		110	0.583142	0.485413
111	282.065	273.398	339.532	310.045		8.667	29.487		111	0.462532	0.626015
112	289.355	274.517	333.274	319.892		14.838	13.382		112	0.591057	0.409203
113	304.976	278.852	344.532	312.222		26.124	32.31		113	0.826113	0.664019
114	293.024	275.608	346.315	314.318		17.416	31.997		114	0.644749	0.659805
115	294.9	277.523	348.383	321.784		17.377	26.599		115	0.643937	0.587135
116	285.142	277.58	372.667	338.33		7.562	34.337		116	0.439518	0.691307
117	264.958	270.114	340.133	321.068		-5.156	19.065		117	0.174637	0.48571
118	268.367	273.283	335.797	315.378		-4.916	20.419		118	0.179635	0.503938
119	259.318	262.973	324.879	312.815		-3.655	12.064		119	0.205898	0.391459
120	255.5	261.261	310.419	309.278		-5.761	1.141		120	0.162036	0.24441

## Sheet: exp1-endosome3
endosome 3						dMFI			%dMFI
frame #	Rab5(rim)	Rab5(background)	Rab11(rim)	Rab11(background)		Rab5	Rab11			Rab5	Rab11
73	287.763	290.038	436.145	470.205		-2.275	-34.06		73	0.0545379	0.067483
74	311.595	312.029	495.845	506.956		-0.434	-11.111		74	0.0708214	0.160351
75	320.417	302.772	524.929	500.559		17.645	24.37		75	0.230729	0.303933
76	297.545	293.681	446.5	497.236		3.864	-50.736		76	0.108837	0
77	326.148	303.562	580.034	495.118		22.586	84.916		77	0.274432	0.548945
78	307.216	296.264	515.284	487.097		10.952	28.187		78	0.17153	0.319379
79	310.125	312.52	462.958	432.382		-2.395	30.576		79	0.0534765	0.329047
80	313.583	299.184	499.615	476.421		14.399	23.194		80	0.202018	0.299174
81	324.719	303.914	546.594	506.211		20.805	40.383		81	0.258679	0.368733
82	367.104	319.941	515.562	514.974		47.163	0.588		82	0.491814	0.207694
83	302.15	297.737	530.99	484.908		4.413	46.082		83	0.113693	0.391795
84	303	296.66	520.087	463.577		6.34	56.51		84	0.130737	0.433994
85	297.913	292.994	458.01	476.763		4.919	-18.753		85	0.118168	0.129426
86	300.673	294.846	475.135	435.724		5.827	39.411		86	0.1262	0.364799
87	304.73	294.355	514.83	425.572		10.375	89.258		87	0.166426	0.566516
88	303.14	305.678	430.11	420.487		-2.538	9.623		88	0.0522117	0.244256
89	316.78	300.882	561.94	486.257		15.898	75.683		89	0.215277	0.511582
90	305.433	293.333	532.635	491.538		12.1	41.097		90	0.181684	0.371622
91	330.933	316.84	511.279	489.564		14.093	21.715		91	0.199312	0.293189
92	317.087	310.949	534.471	480.455		6.138	54.016		92	0.12895	0.423902
93	302.448	292.789	529.438	476.066		9.659	53.372		93	0.160093	0.421295
94	324.538	310.205	549.779	493.083		14.333	56.696		94	0.201435	0.434747
95	328.029	313.603	575.654	508.699		14.426	66.955		95	0.202257	0.476262
96	316.288	305.737	541.721	472.667		10.551	69.054		96	0.167983	0.484756
97	321.708	302.171	554.083	479.086		19.537	74.997		97	0.247464	0.508806
98	324.78	315.98	495.93	468.382		8.8	27.548		98	0.152496	0.316793
99	352.885	325.697	523.281	569.684		27.188	-46.403		99	0.315136	0.0175344
100	403.406	351.895	619.198	590.211		51.511	28.987		100	0.530272	0.322616
101	413.031	339.217	597.094	566.895		73.814	30.199		101	0.72754	0.327521
102	433.552	353.053	582.052	552.053		80.499	29.999		102	0.786669	0.326712
103	363.927	318.888	611.448	585.401		45.039	26.047		103	0.473027	0.310719
104	426.375	321.757	785.49	589.112		104.618	196.378		104	1	1
105	427.521	324.829	666.177	579		102.692	87.177		105	0.982965	0.558095
106	399.396	315.559	631.802	525.836		83.837	105.966		106	0.816193	0.634128
107	387.01	303.23	641.26	541.184		83.78	100.076		107	0.815689	0.610293
108	369.677	308.803	674.531	534.862		60.874	139.669		108	0.613087	0.770515
109	400.337	311.601	644.989	598.635		88.736	46.354		109	0.859525	0.392896
110	367.438	300.882	576.531	499.105		66.556	77.426		110	0.663344	0.518635
111	368.771	295.579	606.094	523.25		73.192	82.844		111	0.722039	0.54056
112	363.685	297.905	602.37	514.169		65.78	88.201		112	0.65648	0.562238
113	357.677	310.303	699.76	538.033		47.374	161.727		113	0.49368	0.859777
114	387.598	332.784	672.12	551.155		54.814	120.965		114	0.559487	0.694825
115	366.023	343.535	678.682	569.576		22.488	109.106		115	0.273565	0.646835
116	375.966	357.639	729.409	587.507		18.327	141.902		116	0.236761	0.779551
117	367.091	334.257	599.761	547.083		32.834	52.678		117	0.365075	0.418487
118	309.452	317.893	542.488	509.429		-8.441	33.059		118	0	0.339095
119	334.214	324.654	511.5	501.331		9.56	10.169		119	0.159218	0.246465

## Sheet: exp1-endosome4
endosome 4						dMFI			%dMFI
frame #	Rab5(rim)	Rab5(background)	Rab11(rim)	Rab11(background)		Rab5	Rab11			Rab5	Rab11
65	327.024	335.021	658.286	598.521		-7.997	59.765		65	0.030526	0.394362
66	334.136	341.542	630.648	570.347		-7.406	60.301		66	0.0351709	0.396816
67	338.693	347.472	808.886	616.875		-8.779	192.011		67	0.0243799	1
68	372.034	351.319	639.864	640.674		20.715	-0.81		68	0.256185	0.11695
69	371.375	360.528	621.284	550.639		10.847	70.645		69	0.178629	0.444188
70	358.312	352.572	652.396	587.046		5.74	65.35		70	0.138491	0.419939
71	364.354	345.987	692.969	561.257		18.367	131.712		71	0.237731	0.723853
72	347.952	348.404	639.365	497.16		-0.452	142.205		72	0.0898252	0.771907
73	341.76	339.577	565.481	556.365		2.183	9.116		73	0.110535	0.162408
74	348.01	339.796	578.27	502.849		8.214	75.421		74	0.157935	0.46606
75	358.41	357.25	582.4	534.178		1.16	48.222		75	0.102495	0.341499
76	352.22	349.921	598.01	541.092		2.299	56.918		76	0.111446	0.381323
77	360.038	359.833	647.346	550.942		0.205	96.404		77	0.0949888	0.562155
78	361.788	351.064	623.587	521.276		10.724	102.311		78	0.177662	0.589207
79	366.183	336.667	572.971	497.487		29.516	75.484		79	0.325356	0.466349
80	344.5	343.276	505.212	518.397		1.224	-13.185		80	0.102998	0.0602772
81	353.115	329.891	574.192	527.827		23.224	46.365		81	0.275905	0.332994
82	386.028	348.555	619.769	569.457		37.473	50.312		82	0.387893	0.35107
83	345.031	335.928	542.865	514.507		9.103	28.358		83	0.164922	0.250529
84	361.796	345.305	527.648	517.073		16.491	10.575		84	0.222987	0.169089
85	355.194	338.756	559.12	524.183		16.438	34.937		85	0.222571	0.280658
86	397.935	339.469	511.426	508.219		58.466	3.207		86	0.552886	0.135347
87	395.509	346.45	483.222	509.569		49.059	-26.347		87	0.478952	0
88	460.938	345.583	526.286	486.333		115.355	39.953		88	1	0.30363
89	398.972	336.909	533.25	494.079		62.063	39.171		89	0.581156	0.300049
90	389.679	335.458	544.964	524.488		54.221	20.476		90	0.519523	0.214432
91	421.793	344.384	661.388	525.57		77.409	135.818		91	0.701767	0.742657
92	407.353	335.669	603.957	516.82		71.684	87.137		92	0.656772	0.519715
93	392.336	326.093	536.224	506.093		66.243	30.131		93	0.614009	0.258649
94	405.543	342.808	606.629	552.849		62.735	53.78		94	0.586438	0.366952
95	387.871	322.012	674.164	550.913		65.859	123.251		95	0.610991	0.685104
96	394.207	321.314	625.181	536.57		72.893	88.611		96	0.666274	0.526466
97	395.44	325.099	672.371	554.558		70.341	117.813		97	0.646216	0.6602
98	396.198	326.901	637.776	546.977		69.297	90.799		98	0.638011	0.536486
99	422.621	338.75	753.69	622.942		83.871	130.748		99	0.752554	0.719438
100	422.862	373.064	735.276	581.134		49.798	154.142		100	0.484761	0.826574
101	427.733	353.337	750.224	571.541		74.396	178.683		101	0.678086	0.938963
102	420.017	351.709	755.534	564.593		68.308	190.941		102	0.630238	0.9951
103	363.621	326.238	738.259	554.919		37.383	183.34		103	0.387186	0.96029
104	354.148	334.104	550.222	507.604		20.044	42.618		104	0.250912	0.315835
105	326.972	329.512	538.685	512.177		-2.54	26.508		105	0.0734148	0.242057
106	333.843	323.878	518.556	506.091		9.965	12.465		106	0.171697	0.177745
107	319.778	311.854	538.333	497.878		7.924	40.455		107	0.155656	0.305929
108	323.192	314.301	560.635	483.077		8.891	77.558		108	0.163256	0.475847
109	304.048	307.135	531.404	499.019		-3.087	32.385		109	0.0691157	0.268971
110	298.625	297.769	497.635	447.686		0.856	49.949		110	0.100105	0.349408
111	286.702	298.583	472.952	461.891		-11.881	11.061		111	0	0.171315
112	301.596	292.679	495.798	488.801		8.917	6.997		112	0.16346	0.152703
113	302.523	306.812	536.477	520.153		-4.289	16.324		113	0.0596686	0.195418
114	315.17	308.125	486.023	466.91		7.045	19.113		114	0.148747	0.20819
115	317.636	320.826	571.091	498.91		-3.19	72.181		115	0.0683061	0.451222
116	334.148	324.66	572.761	558.938		9.488	13.823		116	0.167948	0.183964
117	297.193	304.764	500.375	440.778		-7.571	59.597		117	0.0338741	0.393592

## Sheet: exp1-endosome5
endosome 5						dMFI			%dMFI
frame #	Rab5(rim)	Rab5(background)	Rab11(rim)	Rab11(background)		Rab5	Rab11			Rab5	Rab11
47	365.25	363.417	632.455	578.722		1.833	53.733		47	0.182131	0.385227
48	387.091	380.924	637.068	590.451		6.167	46.617		48	0.209821	0.35148
49	420.614	398.993	621.227	590.806		21.621	30.421		49	0.30856	0.27467
50	373.104	387.625	571.531	595.382		-14.521	-23.851		50	0.0776416	0.0172864
51	392.75	419.423	647.606	611.603		-26.673	36.003		51	0	0.301143
52	350.298	353.756	755.356	663.455		-3.458	91.901		52	0.148325	0.566238
53	392.702	400.109	721.74	674.782		-7.407	46.958		53	0.123094	0.353097
54	384.24	393.731	730.394	655.077		-9.491	75.317		54	0.109779	0.487589
55	371.769	387.231	702.471	702.256		-15.462	0.215		55	0.0716294	0.131419
56	381.194	360.787	763.204	688.335		20.407	74.869		56	0.300804	0.485464
57	368.185	364.863	834.333	650.969		3.322	183.364		57	0.191644	1
58	376.907	363.094	738.204	660.756		13.813	77.448		58	0.258673	0.497695
59	364.333	351.706	605.63	606.656		12.627	-1.026		59	0.251096	0.125534
60	348.536	341.083	656.277	556.708		7.453	99.569		60	0.218038	0.602604
61	351.67	350.744	576.009	522.899		0.926	53.11		61	0.176336	0.382273
62	337.009	345.649	553.366	512.155		-8.64	41.211		62	0.115217	0.325842
63	353.607	355.827	583.804	538.208		-2.22	45.596		63	0.156235	0.346638
64	343.277	351.589	555.571	502.905		-8.312	52.666		64	0.117312	0.380167
65	365.642	354.761	630.642	565.727		10.881	64.915		65	0.23994	0.438258
66	356.542	346.705	604.425	539.045		9.837	65.38		66	0.23327	0.440463
67	348.621	350.116	613.44	583.552		-1.495	29.888		67	0.160867	0.272143
68	360.19	369.895	599.181	561.89		-9.705	37.291		68	0.108412	0.307251
69	359.445	344.489	677.281	605.744		14.956	71.537		69	0.265976	0.469662
70	357.656	360.55	633	596.083		-2.894	36.917		70	0.151929	0.305478
71	359.711	348.956	643.773	586.094		10.755	57.679		71	0.239135	0.403941
72	360.164	338.978	642.711	570.589		21.186	72.122		72	0.305781	0.472437
73	363.847	343.949	635.403	605.517		19.898	29.886		73	0.297552	0.272133
74	363.452	364.517	620.065	577.903		-1.065	42.162		74	0.163615	0.330352
75	385.411	363	696.024	630.17		22.411	65.854		75	0.313608	0.442711
76	365.669	343.398	655.21	620.301		22.271	34.909		76	0.312713	0.295955
77	371.089	339.875	615.226	611.062		31.214	4.164		77	0.369852	0.150147
78	389.341	346.092	686.386	615.658		43.249	70.728		78	0.446746	0.465826
79	452.394	342.94	652.386	556.875		109.454	95.511		79	0.869743	0.583359
80	436.576	334.979	631.053	540.638		101.597	90.415		80	0.819543	0.559191
81	422	340.979	613.463	556.917		81.021	56.546		81	0.688079	0.398568
82	446.721	353.224	753.301	595.453		93.497	157.848		82	0.767791	0.878991
83	444.243	354.88	645.147	602.297		89.363	42.85		83	0.741378	0.333615
84	486.919	357.078	733.154	581.656		129.841	151.498		84	1	0.848876
85	446.964	356.49	732.043	621.388		90.474	110.655		85	0.748476	0.655179
86	418.193	345.668	739.8	608.337		72.525	131.463		86	0.633796	0.75386
87	419.25	341.605	704.938	569.86		77.645	135.078		87	0.666509	0.771004
88	418.09	333.47	679.91	565.17		84.62	114.74		88	0.711074	0.674552
89	417.708	342.875	675.035	610.65		74.833	64.385		89	0.648543	0.435744
90	403.278	330.905	665.201	574.6		72.373	90.601		90	0.632825	0.560073
91	396.188	335.085	628.986	548.825		61.103	80.161		91	0.560819	0.510562
92	392.993	331.94	635.854	527.09		61.053	108.764		92	0.560499	0.646211
93	377.132	329.807	594.816	550.901		47.325	43.915		93	0.472788	0.338665
94	375.222	329.68	641.674	548.195		45.542	93.479		94	0.461396	0.573722
95	386.625	335.7	617.396	519.605		50.925	97.791		95	0.49579	0.594171
96	362.174	319.085	593.958	521.29		43.089	72.668		96	0.445724	0.475026
97	360.059	322.448	613.015	543.818		37.611	69.197		97	0.410724	0.458565
98	350.824	325.74	625.081	551.161		25.084	73.92		98	0.330686	0.480964
99	375.644	352.212	560.561	568.603		23.432	-8.042		99	0.320131	0.0922603
100	360.598	345.158	578.159	568.038		15.44	10.121		100	0.269069	0.178398
101	370.121	352.059	601.068	540.271		18.062	60.797		101	0.285821	0.418728
102	356.727	340.957	579.205	581.697		15.77	-2.492		102	0.271177	0.118581
103	348.28	336.087	578.992	537.13		12.193	41.862		103	0.248323	0.328929
104	350.315	335.989	597.355	557.097		14.326	40.258		104	0.261951	0.321322
105	349.226	334.068	573.919	536.466		15.158	37.453		105	0.267267	0.30802
106	340.777	335.22	564.482	543.774		5.557	20.708		106	0.205924	0.228607
107	354.172	334.331	605.155	573.483		19.841	31.672		107	0.297187	0.280603
108	361.852	347.768	652.639	617.421		14.084	35.218		108	0.260405	0.29742
109	343.454	335.793	594.778	622.274		7.661	-27.496		109	0.219367	0
110	325.759	325.049	573.694	577.774		0.71	-4.08		110	0.174956	0.11105
111	341.94	327.523	565.776	572.529		14.417	-6.753		111	0.262532	0.0983733
112	305.991	312.163	531.824	529.669		-6.172	2.155		112	0.130985	0.140619
113	313.787	331.65	572.704	549.644		-17.863	23.06		113	0.0562889	0.239761
114	306.806	316.887	605.657	562.087		-10.081	43.57		114	0.10601	0.337029
115	324.067	321.032	569.865	546.218		3.035	23.647		115	0.18981	0.242545
116	306.852	310.171	577.315	536.494		-3.319	40.821		116	0.149213	0.323992
117	314.009	312.079	561.037	528.585		1.93	32.452		117	0.18275	0.284302
118	301.056	308.421	581.315	567.933		-7.365	13.382		118	0.123363	0.193863

## Sheet: exp1-endosome6
endosome 6						dMFI			%dMFI
frame #	Rab5(rim)	Rab5(background)	Rab11(rim)	Rab11(background)		Rab5	Rab11			Rab5	Rab11
6	433.293	430.577	857.341	832.605		2.716	24.736		6	0.270297	0.603463
7	423.909	432.15	828.701	809.245		-8.241	19.456		7	0.171411	0.55413
8	400.006	417.018	777.604	787.559		-17.012	-9.955		8	0.092253	0.279336
9	414.024	432.327	843.402	819.618		-18.303	23.784		9	0.0806018	0.594568
10	425.93	433.272	811.134	799.513		-7.342	11.621		10	0.179524	0.480926
11	413.762	421.138	811.273	829.929		-7.376	-18.656		11	0.179217	0.19804
12	418.953	426.714	859.279	808.42		-7.761	50.859		12	0.175743	0.847537
13	415.727	416.469	820.203	804.304		-0.742	15.899		13	0.239089	0.520896
14	428.227	420.522	875.983	879.58		7.705	-3.597		14	0.315323	0.33874
15	389.058	399.509	794.797	772.946		-10.451	21.851		15	0.151466	0.576507
16	391.727	382.763	773.128	746.741		8.964	26.387		16	0.326685	0.618888
17	376.302	376.835	786.791	726.897		-0.533	59.894		17	0.240975	0.931953
18	386.591	375.795	772.409	705.232		10.796	67.177		18	0.343219	1
19	372.939	370.777	698.165	701.864		2.162	-3.699		19	0.265297	0.337787
20	370.823	376.682	708.47	724.741		-5.859	-16.271		20	0.192908	0.220323
21	359.921	357.736	694.616	709.186		2.185	-14.57		21	0.265505	0.236216
22	381.902	370.091	714.183	722.295		11.811	-8.112		22	0.352379	0.296555
23	372.829	363.968	706.951	680.309		8.861	26.642		23	0.325755	0.621271
24	364.257	358.375	657.27	669.048		5.882	-11.778		24	0.29887	0.262303
25	354.809	352.308	713.316	658.62		2.501	54.696		25	0.268357	0.883387
26	339.25	347.205	659.381	688.205		-7.955	-28.824		26	0.173992	0.103037
27	339.03	352.17	704.292	695.607		-13.14	8.685		27	0.127198	0.453494
28	349.185	371.576	692.429	732.281		-22.391	-39.852		28	0.0437078	0
29	359.529	370.942	747.453	750.402		-11.413	-2.949		29	0.142784	0.344794
30	355.983	373.83	774.878	749.009		-17.847	25.869		30	0.0847172	0.614049
31	358.465	371.674	783.622	766.134		-13.209	17.488		31	0.126575	0.535743
32	403.113	370.879	728.792	737.009		32.234	-8.217		32	0.536695	0.295574
33	475.512	391.942	738.97	716.009		83.57	22.961		33	1	0.586878
34	413.155	366.121	764.679	716.781		47.034	47.898		34	0.670265	0.819871
35	361.048	348.415	726.19	661.719		12.633	64.471		35	0.359797	0.974717
36	364.744	340.005	703.331	685.995		24.739	17.336		36	0.469053	0.534322
37	350.165	332.05	746.713	690.473		18.115	56.24		37	0.409272	0.897813
38	347.118	341.505	721.289	697.902		5.613	23.387		38	0.296442	0.590859
39	357.138	341.833	712.401	679.235		15.305	33.166		39	0.383912	0.682226
40	351.375	348.875	729.125	727.779		2.5	1.346		40	0.268348	0.384924
41	332.769	324.657	684.487	659.287		8.112	25.2		41	0.318996	0.607798
42	331.949	336.014	674.551	672.896		-4.065	1.655		42	0.209099	0.387811
43	322.955	337.509	621.59	640.269		-14.554	-18.679		43	0.114436	0.197825
44	305.974	333.208	650.308	664.783		-27.234	-14.475		44	0	0.237104
45	313.344	325.745	628.469	639.5		-12.401	-11.031		45	0.133867	0.269282
46	314.938	323.736	648.331	651.269		-8.798	-2.938		46	0.166384	0.344897
47	318.738	324.778	616.125	623.486		-6.04	-7.361		47	0.191275	0.303572
48	329.884	325.959	639.957	624.341		3.925	15.616		48	0.281208	0.518252
49	317.396	315.586	642.28	652.109		1.81	-9.829		49	0.262121	0.280513
50	336.75	331.583	708.562	693.088		5.167	15.474		50	0.292417	0.516925
51	323.169	332.287	643.638	667.968		-9.118	-24.33		51	0.163496	0.145026
52	316.669	316.968	655.237	623.356		-0.299	31.881		52	0.243087	0.67022
53	333.081	331.606	711.05	669.792		1.475	41.258		53	0.259097	0.757832
54	335.212	334.569	696.081	655.634		0.643	40.447		54	0.251588	0.750255
55	330.562	326.218	647.413	623.667		4.344	23.746		55	0.28499	0.594213
56	303.724	305.721	653.743	618.672		-1.997	35.071		56	0.227763	0.700025

## Sheet: exp1-endosome7
endosome 7						dMFI			%dMFI
frame #	Rab5(rim)	Rab5(background)	Rab11(rim)	Rab11(background)		Rab5	Rab11			Rab5	Rab11
87	198.562	200.732	686.107	672.488		-2.17	13.619		87	0.049571	0.474233
88	193.812	196.012	611.42	626.137		-2.2	-14.717		88	0.0484271	0.336292
89	193.107	192.042	615.795	595.964		1.065	19.831		89	0.172927	0.504474
90	196.973	195.083	545.071	628.869		1.89	-83.798		90	0.204385	0
91	193.839	191.583	584.33	570.238		2.256	14.092		91	0.218341	0.476536
92	192.259	195.442	572.534	576.605		-3.183	-4.071		92	0.0109438	0.388117
93	188.655	188.948	663.819	650.366		-0.293	13.453		93	0.121144	0.473425
94	190.848	187.272	730.644	609.022		3.576	121.622		94	0.268675	1
95	188.773	189.261	567	579.772		-0.488	-12.772		95	0.113708	0.34576
96	187.767	190.534	529.825	509.21		-2.767	20.615		96	0.0268065	0.50829
97	193.492	189.676	549.633	552.449		3.816	-2.816		97	0.277827	0.394226
98	196.017	192.085	528.767	517.091		3.932	11.676		98	0.28225	0.464775
99	205.208	195.812	570.558	588.159		9.396	-17.601		99	0.490601	0.322252
100	224.621	202.302	623.991	630.89		22.319	-6.899		100	0.983375	0.37435
101	222.336	199.581	646.75	628.355		22.755	18.395		101	1	0.497483
102	217.347	199.58	680.758	616.011		17.767	64.747		102	0.8098	0.723128
103	213.653	194.085	693.758	590.205		19.568	103.553		103	0.878475	0.912039
104	185.969	186.1	606.117	600.683		-0.131	5.434		104	0.127321	0.434388
105	187.589	188.477	564.669	563.778		-0.888	0.891		105	0.0984557	0.412272
106	189.274	192.744	530.452	552.182		-3.47	-21.73		106	0	0.302152
107	186.008	188.21	557.782	582.114		-2.202	-24.332		107	0.0483508	0.289485

## Sheet: exp1-endosome8
endosome 8						dMFI			%dMFI
frame #	Rab5(rim)	Rab5(background)	Rab11(rim)	Rab11(background)		Rab5	Rab11			Rab5	Rab11
1	275.548	282.71	557.25	536.994		-7.162	20.256		1	0.309157	0.371002
2	325.713	289.25	526.007	519.49		36.463	6.517		2	0.970122	0.273201
3	302.189	285.81	502.674	498.842		16.379	3.832		3	0.665828	0.254088
4	315.924	293.729	589.015	535.809		22.195	53.206		4	0.753947	0.605557
5	303.409	274.83	541.833	520.745		28.579	21.088		5	0.850671	0.376925
6	311.25	283.704	579.164	533.974		27.546	45.19		6	0.83502	0.548495
7	295.379	279.036	560	535.954		16.343	24.046		7	0.665283	0.397981
8	316.404	277.969	586.368	505.203		38.435	81.165		8	1	0.804583
9	292.921	277.628	580.614	524.148		15.293	56.466		9	0.649374	0.628763
10	292.636	286.053	580.947	557.527		6.583	23.42		10	0.517409	0.393525
11	286.346	274.88	523.404	495.734		11.466	27.67		11	0.591391	0.423779
12	279.493	285.26	635.581	526.964		-5.767	108.617		12	0.330293	1
13	277.964	305.531	606.35	548.622		-27.567	57.728		13	0	0.637747
14	294.393	308.219	679.314	621.398		-13.826	57.916		14	0.208191	0.639085
15	257.485	265.964	502.522	534.302		-8.479	-31.78		15	0.289203	0.000583717
16	246.531	253.017	506.133	518.35		-6.486	-12.217		16	0.319399	0.139843
17	252.156	268.189	524.914	514.228		-16.033	10.686		17	0.174752	0.302878
18	246.148	256.9	497.07	526.556		-10.752	-29.486		18	0.254765	0.0169136
19	251.812	263.283	481.211	510.444		-11.471	-29.233		19	0.243871	0.0187145
20	244.133	253.539	460.688	468.578		-9.406	-7.89		20	0.275158	0.170645
21	238.524	246.96	427.371	459.233		-8.436	-31.862		21	0.289855	0
22	245.532	256.358	447.774	455.636		-10.826	-7.862		22	0.253644	0.170844
23	227.259	241.721	434.095	421.314		-14.462	12.781		23	0.198555	0.317791
24	232.688	242.482	435	416.22		-9.794	18.78		24	0.26928	0.360495
25	227.125	239.22	434.295	426.077		-12.095	8.218		25	0.234417	0.28531
26	225.537	234.274	447.472	444.628		-8.737	2.844		26	0.285294	0.247055
27	225.843	240.713	440.861	457.03		-14.87	-16.169		27	0.192373	0.111711
28	234.472	251.549	441.204	464.671		-17.077	-23.467		28	0.158935	0.0597598
29	229.343	239.146	500.981	490.268		-9.803	10.713		29	0.269143	0.30307
30	228.352	235.415	502.602	503.652		-7.063	-1.05		30	0.310657	0.219335

## Sheet: exp1-endosome9
endosome 9						dMFI			%dMFI
frame #	Rab5(rim)	Rab5(background)	Rab11(rim)	Rab11(background)		Rab5	Rab11			Rab5	Rab11
3	308.982	314.679	592.429	565.411		-5.697	27.018		3	0.329321	1
4	322.72	330.174	584.196	574.987		-7.454	9.209		4	0.309061	0.829309
5	310.327	321.228	558.935	565.165		-10.901	-6.23		5	0.269314	0.681334
6	307.232	319.647	554.643	552.754		-12.415	1.889		6	0.251856	0.759151
7	307.321	318.652	565.411	560.643		-11.331	4.768		7	0.264356	0.786745
8	305.105	316.299	552.337	538.049		-11.194	14.288		8	0.265936	0.877989
9	296.983	314.228	531.006	536.268		-17.245	-5.262		9	0.196163	0.690612
10	294.878	307.768	574.378	563.205		-12.89	11.173		10	0.246379	0.848133
11	291.785	299.567	534.698	534.29		-7.782	0.408		11	0.305279	0.744956
12	292.378	299.643	544.843	548.915		-7.265	-4.072		12	0.31124	0.702018
13	296.483	305.683	549.831	564.665		-9.2	-14.834		13	0.288928	0.598869
14	300.209	312.183	575.395	590.772		-11.974	-15.377		14	0.256942	0.593665
15	283.215	294.362	525.349	552.786		-11.147	-27.437		15	0.266478	0.478075
16	277.03	294.532	538.567	534.709		-17.502	3.858		16	0.193199	0.778023
17	281.902	285.8	537.988	550.55		-3.898	-12.562		17	0.350065	0.620645
18	275.098	278.432	528.835	559.882		-3.334	-31.047		18	0.356568	0.443475
19	271.183	271.159	518.195	539.114		0.024	-20.919		19	0.395289	0.540547
20	276	277.859	527.518	535.386		-1.859	-7.868		20	0.373576	0.665635
21	281.189	274.318	530.854	526.936		6.871	3.918		21	0.47424	0.778598
22	271.354	278.45	502.549	503.5		-7.096	-0.951		22	0.313189	0.731931
23	274.994	266.35	505.805	516.345		8.644	-10.54		23	0.494684	0.640025
24	298.019	278.014	496.438	498.806		20.005	-2.368		24	0.625686	0.71835
25	340.856	288.389	520.356	510.037		52.467	10.319		25	1	0.839948
26	290.012	271.519	543.769	541.009		18.493	2.76		26	0.608251	0.767499
27	281.05	268.778	515.919	528.806		12.272	-12.887		27	0.536518	0.61753
28	287.18	282.308	564.477	568.464		4.872	-3.987		28	0.45119	0.702832
29	279.54	280.36	591.812	570.684		-0.82	21.128		29	0.385556	0.943547
30	278.808	270.79	593.32	566.634		8.018	26.686		30	0.487466	0.996818
31	310.791	287.759	587.285	560.531		23.032	26.754		31	0.66059	0.99747
32	337.988	291.723	579.105	571.232		46.265	7.873		32	0.928486	0.816505
33	325.349	289.031	547.413	579.71		36.318	-32.297		33	0.813789	0.431495
34	317.199	278.944	582.955	556.853		38.255	26.102		34	0.836124	0.991221
35	305.341	273.677	560.08	563.897		31.664	-3.817		35	0.760124	0.704462
36	294.432	270.302	565.96	577.897		24.13	-11.937		36	0.673251	0.626635
37	292.678	277.682	605.844	599.953		14.996	5.891		37	0.567928	0.797508
38	283.172	269.331	555.006	548.144		13.841	6.862		38	0.55461	0.806815
39	270.308	287.897	559.314	589.754		-17.589	-30.44		39	0.192196	0.449293
40	255.738	276.013	526.628	563.219		-20.275	-36.591		40	0.161224	0.390339
41	252.433	274.536	529.713	575.182		-22.103	-45.469		41	0.140146	0.305248
42	250.433	273.264	502.805	550.568		-22.831	-47.763		42	0.131751	0.283261
43	247.915	268.286	526.043	592.986		-20.371	-66.943		43	0.160117	0.0994297
44	253.839	273.129	535.673	594.473		-19.29	-58.8		44	0.172582	0.177476
45	252.149	272.424	532.702	581.83		-20.275	-49.128		45	0.161224	0.270178
46	245.417	279.674	525.131	590.768		-34.257	-65.637		46	0	0.111947
47	244.125	269.906	493.28	562.79		-25.781	-69.51		47	0.0977353	0.0748263
48	238.821	258.665	499.065	555.272		-19.844	-56.207		48	0.166194	0.202329
49	240.994	265.201	521.11	571.728		-24.207	-50.618		49	0.115885	0.255897
50	251.42	271.112	551.722	618.513		-19.692	-66.791		50	0.167947	0.100887
51	254.807	266.974	535.67	612.987		-12.167	-77.317		51	0.254716	0
52	253.881	272.97	548.244	603.211		-19.089	-54.967		52	0.1749	0.214214
53	253.25	275.315	607.688	644.315		-22.065	-36.627		53	0.140584	0.389994
54	243.585	258.789	579.773	602.147		-15.204	-22.374		54	0.219697	0.526602
55	233.67	248.845	535.773	565.422		-15.175	-29.649		55	0.220031	0.456874
56	231.779	244.321	510.157	515.049		-12.542	-4.892		56	0.250392	0.694158
57	233.738	242.272	508.86	531.018		-8.534	-22.158		57	0.296608	0.528672
58	234.814	238.598	527.93	533.013		-3.784	-5.083		58	0.351379	0.692328
59	230.683	242.023	517.061	539.295		-11.34	-22.234		59	0.264252	0.527944
60	234.226	244.055	510.439	510.745		-9.829	-0.306		60	0.281675	0.738113
61	231.782	239.863	539.814	554.849		-8.081	-15.035		61	0.301831	0.596943

## Sheet: exp1-endosome10
endosome 10						dMFI			%dMFI
frame #	Rab5(rim)	Rab5(background)	Rab11(rim)	Rab11(background)		Rab5	Rab11			Rab5	Rab11
1	359.553	358.913	638.495	644.955		0.64	-6.46		1	0.387774	0.527753
2	351.827	368.697	639.106	642.754		-16.87	-3.648		2	0.199531	0.559388
3	355.183	364.352	640.322	658.303		-9.169	-17.981		3	0.282322	0.398144
4	349.76	369.076	634.562	646.542		-19.316	-11.98		4	0.173235	0.465654
5	348.745	356.549	620.939	629.619		-7.804	-8.68		5	0.296996	0.502779
6	332.759	349.299	671.325	655.862		-16.54	15.463		6	0.203079	0.774384
7	326.509	341.336	688.387	679.877		-14.827	8.51		7	0.221495	0.696164
8	330.708	338.078	694.646	676.933		-7.37	17.713		8	0.301662	0.799696
9	360.217	345.496	669.972	660.108		14.721	9.864		9	0.539154	0.711396
10	383.142	354.422	675.915	712.825		28.72	-36.91		10	0.689651	0.185195
11	357.846	341.212	651.077	679.913		16.634	-28.836		11	0.55972	0.276027
12	352.525	346.312	663.373	695.808		6.213	-32.435		12	0.447688	0.235538
13	316.966	346.462	675.721	705.438		-29.496	-29.717		13	0.0637941	0.266115
14	318.255	353.685	721.804	748.892		-35.43	-27.088		14	0	0.295691
15	394.465	336.877	691.765	706.5		57.588	-14.735		15	1	0.434661
16	341.872	319.21	677.25	683.403		22.662	-6.153		16	0.624524	0.531207
17	367.167	322.879	699.13	665.585		44.288	33.545		17	0.857017	0.977804
18	329.885	322.754	666.057	670.258		7.131	-4.201		18	0.457557	0.553167
19	325.667	319.685	677.099	653.016		5.982	24.083		19	0.445204	0.871358
20	312.568	310.435	637.615	660.54		2.133	-22.925		20	0.403825	0.342524
21	284.786	297.532	652.418	660.246		-12.746	-7.828		21	0.243867	0.512364
22	280.026	303.411	637.449	682.448		-23.385	-44.999		22	0.129491	0.0941951
23	291.719	299.661	625.959	679.331		-7.942	-53.372		23	0.295513	0
24	321.005	308.524	590.88	625.323		12.481	-34.443		24	0.515072	0.212949
25	302.38	296.629	665.896	662.996		5.751	2.9		25	0.442721	0.633052
26	304.318	302.327	633.005	652.843		1.991	-19.838		26	0.402298	0.377253
27	322.266	303.512	601.443	614.093		18.754	-12.65		27	0.582511	0.458117
28	314.082	311.762	656.367	662.988		2.32	-6.621		28	0.405835	0.525942
29	316.94	311.341	665.73	688.563		5.599	-22.833		29	0.441087	0.343559
30	300.165	326.063	659.135	705.468		-25.898	-46.333		30	0.102475	0.0791878
31	290.715	321.238	668.14	690.849		-30.523	-22.709		31	0.0527532	0.344954
32	271.275	296.948	636.745	674.659		-25.673	-37.914		32	0.104894	0.1739
33	269.279	293.862	614.294	652.927		-24.583	-38.633		33	0.116612	0.165812
34	271.289	292.842	627.382	661.673		-21.553	-34.291		34	0.149186	0.214659
35	262.443	288.265	600.811	638.75		-25.822	-37.939		35	0.103292	0.173619
36	263.59	275.172	597.835	608.772		-11.582	-10.937		36	0.25638	0.477388
37	273.311	285.877	654.901	670.396		-12.566	-15.495		37	0.245802	0.426111
38	271.83	286.299	649.434	666.466		-14.469	-17.032		38	0.225343	0.40882
39	267.127	278.922	666.41	659.537		-11.795	6.873		39	0.254091	0.677748
40	264.231	276.481	646.368	660.806		-12.25	-14.438		40	0.249199	0.438002
41	267.877	278.097	680.783	678.955		-10.22	1.828		41	0.271023	0.620992
42	267.425	279.684	640.875	638.008		-12.259	2.867		42	0.249102	0.632681
43	272.615	287.48	691.25	708.402		-14.865	-17.152		43	0.221086	0.40747
44	271.418	279.375	661.981	652.807		-7.957	9.174		44	0.295351	0.703634
45	271.178	281.856	675.779	670.061		-10.678	5.718		45	0.266099	0.664754
46	264.072	276.424	675.01	690.466		-12.352	-15.456		46	0.248103	0.42655
47	262.745	273.197	647.707	647.837		-10.452	-0.13		47	0.268529	0.598965
48	258.404	268.519	660.625	673		-10.115	-12.375		48	0.272152	0.46121
49	264.06	272.238	652.575	651.219		-8.178	1.356		49	0.292976	0.615682
50	267.935	282.867	673.915	687.707		-14.932	-13.792		50	0.220366	0.445269
51	264.515	278.373	661.615	671.274		-13.858	-9.659		51	0.231912	0.491765
52	261.045	275.143	666.345	659.913		-14.098	6.432		52	0.229332	0.672787
53	262.85	276.627	758.695	735.278		-13.777	23.417		53	0.232783	0.863865
54	253.555	268.5	712.205	676.687		-14.945	35.518		54	0.220226	1
55	251.23	265.345	709.695	679.349		-14.115	30.346		55	0.229149	0.941816
56	253.85	258.913	690.805	669.163		-5.063	21.642		56	0.326464	0.843897

[truncated: 37 more sheets: exp1-endosome11, exp1-endosome12, exp1-endosome13, exp1-endosome14, exp1-endosome15, exp1-endosome16, exp1-time, exp1-aligned, exp2-endosome1, exp2-endosome2, exp2-endosome3, exp2-endosome4, exp2-endosome5, exp2-endosome6, exp2-endosome7, exp2-endosome8, exp2-endosome9, exp2-endosome10, exp2-endosome11, exp2-endosome12 …]
