# Supplementary material for: A novel live-cell imaging assay reveals regulation of endosome maturation
Source: eLife. 2021 Nov 30;10:e70982. doi: 10.7554/eLife.70982 (PMC8635980; doi:10.7554/eLife.70982)
Supplement: Figure 8—source data 2. [file elife-70982-fig8-data2.xlsx]

## Sheet: 1
endosome 1
line profiles																						line profiles normalised for individual min-max																				line profiles normalised for overal min-max
individual max		333.691	319.798			369.302	361.806			349.427	335.313			352.732	312.171			386.968	298.482																							overal max		386.968	361.806			386.968	361.806
individual min		300	267.37			298.144	261.477			319.372	251.005			319.326	231.547			327.212	239.788																							overal min		298.144	231.547			298.144	231.547
	t89				t90				t91				t92				t93					t89				t90				t91				t92				t93					t89				t90
		Rab5	Rab11			Rab5	Rab11			Rab5	Rab11			Rab5	Rab11			Rab5	Rab11				Rab5	Rab11			Rab5	Rab11			Rab5	Rab11			Rab5	Rab11			Rab5	Rab11				Rab5	Rab11			Rab5	Rab11
	0	307.762	284.287		0	330.949	356.278		0	319.406	331.42		0	323.73	255.995		0	367.363	261.537			0	0.230412	0.322663		0	0.461021	0.944901		0	0.00111794	0.953828		0	0.131838	0.303234		0	0.67191	0.370544			0	0.108288	0.404885		0	0.369327	0.957562
	0.10913	306.53	282.148		0.10913	314.788	359.854		0.10913	324.213	294.017		0.10913	321.061	252.26		0.10913	351.917	256.409			0.10913	0.193835	0.281875		0.10913	0.233901	0.980544		0.10913	0.161083	0.510174		0.10913	0.0519426	0.256909		0.10913	0.413437	0.283185			0.10913	0.0944143	0.388469		0.10913	0.18738	0.985015
	0.21825	320.484	300.043		0.21825	302.581	361.806		0.21825	332.865	286.379		0.21825	332.942	253.335		0.21825	361.661	259.75			0.21825	0.608017	0.623198		0.21825	0.0623528	1		0.21825	0.448922	0.419585		0.21825	0.407605	0.270239		0.21825	0.576498	0.340114			0.21825	0.251513	0.525846		0.21825	0.0499513	1
	0.32738	327.194	314.959		0.32738	307.28	355.694		0.32738	346.514	273.506		0.32738	346.031	252.462		0.32738	356.978	261.058			0.32738	0.80718	0.907709		0.32738	0.128396	0.93908		0.32738	0.903085	0.266898		0.32738	0.79942	0.259414		0.32738	0.498122	0.362393			0.32738	0.327055	0.640358		0.32738	0.102859	0.953078
	0.43651	325.322	314.813		0.43651	298.144	333.372		0.43651	343.469	257.397		0.43651	341.335	248.131		0.43651	353.595	260.49			0.43651	0.751601	0.90492		0.43651	0	0.716592		0.43651	0.801742	0.0758158		0.43651	0.65885	0.205694		0.43651	0.441511	0.352704			0.43651	0.305974	0.639235		0.43651	0	0.781712
	0.54563	328.8	319.798		0.54563	304.652	320.306		0.54563	344.329	255.243		0.54563	338.492	253.293		0.54563	338.195	257.298			0.54563	0.854837	1		0.54563	0.0914669	0.586361		0.54563	0.830356	0.0502762		0.54563	0.573731	0.269727		0.54563	0.183803	0.298331			0.54563	0.345131	0.677504		0.54563	0.0732748	0.681405
	0.65476	325.648	313.817		0.65476	323.373	313.152		0.65476	346.845	252.092		0.65476	344.785	253.455		0.65476	328.693	264.441			0.65476	0.761292	0.885917		0.65476	0.354548	0.515055		0.65476	0.914088	0.0128932		0.65476	0.762124	0.271736		0.65476	0.0247855	0.420032			0.65476	0.30965	0.631587		0.65476	0.284031	0.626484
	0.76389	321.519	298.832		0.76389	328.233	312.622		0.76389	347.365	256.529		0.76389	347.683	249.584		0.76389	327.212	270.893			0.76389	0.638725	0.600109		0.76389	0.422855	0.509773		0.76389	0.931373	0.0655274		0.76389	0.848875	0.223718		0.76389	0	0.529952			0.76389	0.263161	0.516553		0.76389	0.338752	0.622415
	0.87302	319.625	290.685		0.87302	314.255	305.997		0.87302	345.488	266.075		0.87302	352.732	256.007		0.87302	330.857	272.107			0.87302	0.582503	0.444702		0.87302	0.226416	0.44374		0.87302	0.868928	0.178759		0.87302	1	0.303389		0.87302	0.0610056	0.550637			0.87302	0.241835	0.454004		0.87302	0.181384	0.571555
	0.98214	313.686	292.638		0.98214	318.568	301.928		0.98214	346.88	267.642		0.98214	337.348	269.327		0.98214	339.276	278.757			0.98214	0.406224	0.481947		0.98214	0.287023	0.403184		0.98214	0.915233	0.197338		0.98214	0.539488	0.468589		0.98214	0.201897	0.663931			0.98214	0.174973	0.468995		0.98214	0.229937	0.540317
	1.09127	320.282	296.538		1.09127	313.189	299.614		1.09127	332.485	281.619		1.09127	333.185	274.917		1.09127	327.474	293.256			1.09127	0.602018	0.556345		1.09127	0.211428	0.380119		1.09127	0.436306	0.363129		1.09127	0.414876	0.537924		1.09127	0.00438779	0.910961			1.09127	0.249238	0.498939		1.09127	0.169377	0.522553
	1.2004	311.12	301.556		1.2004	317.592	298.322		1.2004	335.319	296.592		1.2004	341.712	288.467		1.2004	331.899	298.422			1.2004	0.330073	0.652062		1.2004	0.273316	0.367242		1.2004	0.530582	0.540719		1.2004	0.670123	0.705991		1.2004	0.0784463	0.998976			1.2004	0.146089	0.537464		1.2004	0.218955	0.512634
	1.30952	316.069	305.563		1.30952	310.912	285.967		1.30952	340.886	303.844		1.30952	339.485	284.574		1.30952	331.418	298.482			1.30952	0.476955	0.728484		1.30952	0.179436	0.244097		1.30952	0.715821	0.626737		1.30952	0.603462	0.657702		1.30952	0.0703836	1			1.30952	0.201801	0.568222		1.30952	0.143748	0.417785
	1.41865	317.976	300.853		1.41865	305.848	279.823		1.41865	347.478	301.763		1.41865	337.649	296.67		1.41865	333.996	294.98			1.41865	0.533558	0.638657		1.41865	0.108273	0.182858		1.41865	0.935143	0.602058		1.41865	0.548514	0.807729		1.41865	0.113537	0.940334			1.41865	0.223271	0.532068		1.41865	0.0867385	0.370617
	1.52778	320.44	294.035		1.52778	308.456	272.99		1.52778	344.01	293.664		1.52778	339.014	312.171		1.52778	333.141	294.974			1.52778	0.606702	0.508607		1.52778	0.144917	0.114752		1.52778	0.819739	0.505999		1.52778	0.589359	1		1.52778	0.0992205	0.940218			1.52778	0.251014	0.479725		1.52778	0.116094	0.318161
	1.6369	319	284.243		1.6369	304.554	274.207		1.6369	349.427	278.991		1.6369	335.859	301.784		1.6369	338.615	281.912			1.6369	0.563958	0.321827		1.6369	0.0900868	0.126883		1.6369	1	0.331952		1.6369	0.494916	0.871167		1.6369	0.190837	0.717687			1.6369	0.234801	0.404549		1.6369	0.0721693	0.327503
	1.74603	316.688	277.569		1.74603	305.253	273.477		1.74603	337.496	272.853		1.74603	327.315	293.609		1.74603	348.178	273.175			1.74603	0.495325	0.194535		1.74603	0.0999087	0.119606		1.74603	0.603032	0.259152		1.74603	0.239163	0.769768		1.74603	0.35086	0.568832			1.74603	0.208769	0.353316		1.74603	0.0800376	0.321899
	1.85516	308.089	277.766		1.85516	305.291	270.157		1.85516	325.03	261.445		1.85516	319.995	279.671		1.85516	341.361	262.321			1.85516	0.240109	0.198291		1.85516	0.10044	0.0865154		1.85516	0.188263	0.12384		1.85516	0.0200323	0.596892		1.85516	0.236778	0.383906			1.85516	0.111966	0.354827		1.85516	0.0804632	0.296412
	1.96429	300	280.233		1.96429	303.057	273.991		1.96429	327.656	260.396		1.96429	333.085	270.724		1.96429	339.204	263.531			1.96429	0	0.245343		1.96429	0.0690463	0.12473		1.96429	0.275629	0.111395		1.96429	0.411868	0.485922		1.96429	0.200685	0.404526			1.96429	0.0208929	0.373765		1.96429	0.0553136	0.325845
	2.07341	306.267	291.219		2.07341	302.259	277.653		2.07341	322.763	262.21		2.07341	333.413	269.992		2.07341	350.623	268.744			2.07341	0.186038	0.454891		2.07341	0.0578234	0.16123		2.07341	0.112839	0.132915		2.07341	0.421695	0.476847		2.07341	0.391776	0.493344			2.07341	0.0914567	0.458105		2.07341	0.0463228	0.353958
	2.18254	312.824	300.136		2.18254	309.4	280.721		2.18254	333.5	267.211		2.18254	344.59	259.184		2.18254	351.982	266.632			2.18254	0.380636	0.624968		2.18254	0.15818	0.191809		2.18254	0.470083	0.192227		2.18254	0.756281	0.342785		2.18254	0.414519	0.457362			2.18254	0.165267	0.526559		2.18254	0.12672	0.377511
	2.29167	307.485	307.671		2.29167	309.421	280.135		2.29167	334.661	272.431		2.29167	352.506	251.856		2.29167	367.561	264.265			2.29167	0.222169	0.768688		2.29167	0.158484	0.185968		2.29167	0.508696	0.254147		2.29167	0.993232	0.251899		2.29167	0.675222	0.417037			2.29167	0.105161	0.584404		2.29167	0.126963	0.373013
	2.40079	314.795	315.199		2.40079	318.226	285.94		2.40079	340.572	284.778		2.40079	349.335	241.724		2.40079	362.97	264.584			2.40079	0.439156	0.912283		2.40079	0.282221	0.243828		2.40079	0.70537	0.400593		2.40079	0.898321	0.126229		2.40079	0.598402	0.422458			2.40079	0.187464	0.642199		2.40079	0.22609	0.417578
	2.50992	316.653	309.312		2.50992	317.106	282.162		2.50992	344.925	288.57		2.50992	351.397	239.96		2.50992	372.511	276.724			2.50992	0.494298	0.799998		2.50992	0.26648	0.206172		2.50992	0.850216	0.445569		2.50992	0.960049	0.104356		2.50992	0.758056	0.629294			2.50992	0.208379	0.597006		2.50992	0.213479	0.388574
	2.61905	317.111	305.362		2.61905	331.614	280.473		2.61905	343.457	292.404		2.61905	340.328	241.349		2.61905	386.968	265.669			2.61905	0.507904	0.724652		2.61905	0.470369	0.189337		2.61905	0.801346	0.491045		2.61905	0.6287	0.121584		2.61905	1	0.440947			2.61905	0.21354	0.56668		2.61905	0.376816	0.375607
	2.72817	313.748	304.651		2.72817	347.653	261.477		2.72817	335.122	275.585		2.72817	335.912	233.757		2.72817	372.776	252.249			2.72817	0.408056	0.711098		2.72817	0.695757	0		2.72817	0.524031	0.291551		2.72817	0.496511	0.0274221		2.72817	0.762492	0.21231			2.72817	0.175668	0.561225		2.72817	0.557377	0.229775
	2.8373	317.317	291.887		2.8373	349.701	264.818		2.8373	335.927	269.274		2.8373	338.195	232.365		2.8373	362.552	239.788			2.8373	0.513998	0.467632		2.8373	0.724547	0.0333004		2.8373	0.550811	0.216694		2.8373	0.564861	0.010152		2.8373	0.591409	0			2.8373	0.215851	0.463233		2.8373	0.58044	0.255424
	2.94643	315.012	278.255		2.94643	353.12	272.413		2.94643	343.741	254.072		2.94643	330.669	231.547		2.94643	358.263	246.326			2.94643	0.445585	0.207616		2.94643	0.772595	0.109001		2.94643	0.810819	0.0363855		2.94643	0.339567	0		2.94643	0.519636	0.111393			2.94643	0.189903	0.358581		2.94643	0.618932	0.313731
	3.05556	309.94	273.782		3.05556	363.516	275.493		3.05556	343.5	255.953		3.05556	338.271	237.666		3.05556	342.166	239.831			3.05556	0.295028	0.122293		3.05556	0.918685	0.1397		3.05556	0.802787	0.0586988		3.05556	0.567133	0.075901		3.05556	0.250251	0.0007309			3.05556	0.132797	0.324239		3.05556	0.735966	0.337376
	3.16468	310.427	267.37		3.16468	363.078	291.174		3.16468	340.227	251.689		3.16468	336.775	246.653		3.16468	338.002	245.612			3.16468	0.309498	0		3.16468	0.912535	0.295996		3.16468	0.693891	0.00811664		3.16468	0.522333	0.187365		3.16468	0.180565	0.0992286			3.16468	0.138285	0.275018		3.16468	0.731039	0.457759
	3.27381	314.079	281.591		3.27381	369.302	312.393		3.27381	336.507	251.005		3.27381	338.257	252.525		3.27381	352.702	244.379			3.27381	0.417904	0.271247		3.27381	1	0.50749		3.27381	0.570129	0		3.27381	0.566711	0.260202		3.27381	0.426569	0.0782165			3.27381	0.179403	0.384191		3.27381	0.801108	0.620657
	3.38294	333.691	281.252		3.38294	346.673	333.35		3.38294	332.576	261.567		3.38294	331.67	257.618		3.38294	358.092	254.044			3.38294	1	0.264775		3.38294	0.681987	0.716373		3.38294	0.43933	0.125277		3.38294	0.369516	0.323371		3.38294	0.516766	0.242885			3.38294	0.400191	0.381586		3.38294	0.546345	0.781544
	3.49206	332.643	286.091						3.49206	325.274	278.319		3.49206	319.326	259.79		3.49206	343.736	253.784			3.49206	0.968894	0.357078						3.49206	0.196385	0.323978		3.49206	0	0.350312		3.49206	0.276523	0.238467			3.49206	0.388393	0.418737
	3.60119	313.556	287.11						3.60119	319.372	284.544		3.60119	326.917	266.738		3.60119	349.156	252.017			3.60119	0.40238	0.376522						3.60119	0	0.397818		3.60119	0.227231	0.436481		3.60119	0.367237	0.208363			3.60119	0.173515	0.426563
	3.71032	305.566	298.88						3.71032	326.084	316.811		3.71032	324.401	265.455		3.71032	353.088	263.951			3.71032	0.165207	0.601017						3.71032	0.223315	0.780548		3.71032	0.151936	0.420567		3.71032	0.433035	0.411677			3.71032	0.0835558	0.516919
	3.81944	310.081	303.049						3.81944	320.406	335.313											3.81944	0.299216	0.68054						3.81944	0.0344033	1											3.81944	0.134385	0.548925

## Sheet: 2
endosome 2
line profiles																													line profiles normalised for individual min-max
individual max		297.653	431.132			342.143	478.808			366.608	404.155			357.745	409.782			365.885	451.932			333.062	448.389			298.361	380.348
individual min		247.234	303.259			284.022	332.791			292.845	315.816			282.08	309.75			286.987	323.7			271.534	309.635			228.424	293.036
	t17				t18				t19				t20				t21				t22				t23				t17				t18				t19				t20				t21				t22
		Rab5	Rab11			Rab5	Rab11			Rab5	Rab11			Rab5	Rab11			Rab5	Rab11			Rab5	Rab11			Rab5	Rab11			Rab5	Rab11			Rab5	Rab11			Rab5	Rab11			Rab5	Rab11			Rab5	Rab11
	0	249.214	314.813		0	290.714	359.672		0	312.363	326.097		0	288.937	322.692		0	311.032	353.996		0	279.127	316.623		0	245.136	293.036		0	0.0392693	0.0903553		0	0.11514	0.184095		0	0.264608	0.116378		0	0.0906189	0.129379		0	0.304761	0.236259		0
	0.10913	249.318	321.933		0.10913	294.764	364.229		0.10913	321.691	336.318		0.10913	283.853	331.076		0.10913	305.888	339.963		0.10913	274.576	320.806		0.10913	247.978	300.797		0.10913	0.041334	0.146036		0.10913	0.184826	0.215304		0.10913	0.391058	0.232085		0.10913	0.0234309	0.213192		0.10913	0.239568	0.126825		0.10913
	0.21825	250.894	316.612		0.21825	303.173	374.017		0.21825	327.376	341.821		0.21825	282.243	329.02		0.21825	309.016	347.96		0.21825	283.909	318.058		0.21825	256.364	305.393		0.21825	0.0725964	0.104424		0.21825	0.329507	0.282337		0.21825	0.468132	0.294376		0.21825	0.00215687	0.192638		0.21825	0.279209	0.189188		0.21825
	0.32738	264.296	315.912		0.32738	318.623	377.07		0.32738	323.057	344.716		0.32738	295.749	335.306		0.32738	303.076	343.239		0.32738	286.517	323.095		0.32738	250.765	307.668		0.32738	0.338404	0.0989497		0.32738	0.595331	0.303246		0.32738	0.409585	0.327139		0.32738	0.180652	0.255478		0.32738	0.203926	0.152372		0.32738
	0.43651	263.218	324.169		0.43651	314.036	376.755		0.43651	329.974	353.5		0.43651	302.473	331.719		0.43651	304.806	359.04		0.43651	292.177	328.337		0.43651	253.839	322.09		0.43651	0.317017	0.163522		0.43651	0.516394	0.301088		0.43651	0.503349	0.426585		0.43651	0.269523	0.21962		0.43651	0.225855	0.275594		0.43651
	0.54563	266.099	327.961		0.54563	317.983	365.853		0.54563	335.031	371.484		0.54563	305.854	331.253		0.54563	311.125	390.41		0.54563	293.097	326.929		0.54563	261.57	319.341		0.54563	0.374174	0.193176		0.54563	0.584307	0.226426		0.54563	0.571904	0.630158		0.54563	0.314205	0.214961		0.54563	0.305938	0.520229		0.54563
	0.65476	260.296	332.244		0.65476	320.861	366.282		0.65476	339.243	369.229		0.65476	312.39	348.095		0.65476	314.733	405.878		0.65476	304.882	324.765		0.65476	272.035	330.596		0.65476	0.259068	0.22667		0.65476	0.633826	0.229364		0.65476	0.629009	0.604634		0.65476	0.400584	0.383327		0.65476	0.351673	0.640854		0.65476
	0.76389	270.137	328.735		0.76389	322.646	344.374		0.76389	332.093	368.749		0.76389	312.855	355.339		0.76389	327.21	402.471		0.76389	300.677	325.954		0.76389	274.46	332.937		0.76389	0.45426	0.199229		0.76389	0.664541	0.0793264		0.76389	0.532084	0.599197		0.76389	0.406726	0.455744		0.76389	0.509813	0.614285		0.76389
	0.87302	268.608	326.538		0.87302	328.849	354.414		0.87302	336.868	372.229		0.87302	315.993	358.417		0.87302	327.853	387.16		0.87302	311.012	328.52		0.87302	284.704	350.831		0.87302	0.423926	0.182048		0.87302	0.771256	0.148085		0.87302	0.596822	0.638593		0.87302	0.448203	0.486514		0.87302	0.517964	0.494884		0.87302
	0.98214	268.467	335.243		0.98214	327.202	360.202		0.98214	337.899	373.333		0.98214	323.113	355.093		0.98214	326.06	382.411		0.98214	307.759	334.899		0.98214	285.869	352.197		0.98214	0.421143	0.250123		0.98214	0.742919	0.187725		0.98214	0.610786	0.651085		0.98214	0.542294	0.453285		0.98214	0.495235	0.45785		0.98214
	1.09127	272.815	337.054		1.09127	327.984	358.539		1.09127	346.228	376.94		1.09127	329.36	355.962		1.09127	330.354	391.926		1.09127	298.975	341.528		1.09127	287.611	345.507		1.09127	0.507381	0.264286		1.09127	0.756377	0.176336		1.09127	0.723712	0.691916		1.09127	0.624855	0.461972		1.09127	0.549659	0.532051		1.09127
	1.2004	275.17	327.58		1.2004	336.686	365.883		1.2004	343.623	377.662		1.2004	334.373	362.124		1.2004	343.386	397.418		1.2004	298.135	341.323		1.2004	290.239	342.851		1.2004	0.55408	0.190197		1.2004	0.906108	0.226631		1.2004	0.688387	0.700095		1.2004	0.691106	0.523572		1.2004	0.714839	0.57488		1.2004
	1.30952	272.277	326.153		1.30952	332.576	375.896		1.30952	346.941	382.486		1.30952	331.005	360.611		1.30952	354.558	393.924		1.30952	302.089	351.093		1.30952	280.408	350.974		1.30952	0.496701	0.179037		1.30952	0.835387	0.295205		1.30952	0.733378	0.754702		1.30952	0.646604	0.508447		1.30952	0.856435	0.547632		1.30952
	1.41865	275.512	347.543		1.41865	338.043	379.926		1.41865	350.188	395.515		1.41865	331.976	386.629		1.41865	353.468	423.282		1.41865	297.228	352.887		1.41865	277.563	343.629		1.41865	0.560872	0.346312		1.41865	0.92946	0.322805		1.41865	0.777393	0.902192		1.41865	0.659434	0.768544		1.41865	0.842621	0.776577		1.41865
	1.52778	265.533	351.484		1.52778	342.143	390.228		1.52778	349.844	380.75		1.52778	339.579	392.971		1.52778	356.542	451.932		1.52778	307.614	371.82		1.52778	283.439	352.272		1.52778	0.362932	0.377132		1.52778	1	0.393358		1.52778	0.772731	0.735054		1.52778	0.759909	0.831944		1.52778	0.881577	1		1.52778
	1.6369	270.163	354.707		1.6369	335.774	387.8		1.6369	346.104	388.315		1.6369	357.745	403.838		1.6369	362.548	448.687		1.6369	315.282	365.624		1.6369	289.252	348.873		1.6369	0.454774	0.402337		1.6369	0.890415	0.37673		1.6369	0.722029	0.820681		1.6369	1	0.940579		1.6369	0.957699	0.974694		1.6369
	1.74603	277.6	357.582		1.74603	329.084	386.242		1.74603	353.255	394.898		1.74603	336.795	409.782		1.74603	358.975	442.087		1.74603	314.996	363.23		1.74603	284.486	346.775		1.74603	0.602275	0.42482		1.74603	0.775303	0.36606		1.74603	0.818971	0.895211		1.74603	0.723125	1		1.74603	0.91242	0.923225		1.74603
	1.85516	285.755	364.097		1.85516	336.418	384.38		1.85516	354.468	396.654		1.85516	353.412	408.707		1.85516	358.388	433.152		1.85516	313.886	365.377		1.85516	286.068	360.623		1.85516	0.764025	0.475769		1.85516	0.901496	0.353308		1.85516	0.835419	0.915081		1.85516	0.94274	0.989253		1.85516	0.904974	0.853547		1.85516
	1.96429	281.46	373.418		1.96429	335.488	376.54		1.96429	353.598	400.786		1.96429	356.112	400.434		1.96429	358.026	423.059		1.96429	308.962	374.422		1.96429	285.16	354.328		1.96429	0.678844	0.548662		1.96429	0.885483	0.299616		1.96429	0.823627	0.961859		1.96429	0.978421	0.90655		1.96429	0.900384	0.774838		1.96429
	2.07341	283.91	368.615		2.07341	329.821	371.601		2.07341	360.317	404.155		2.07341	345.252	402.71		2.07341	355.69	427.645		2.07341	312.102	376.955		2.07341	285.401	354.589		2.07341	0.727427	0.511101		2.07341	0.787988	0.265791		2.07341	0.914707	1		2.07341	0.834891	0.929303		2.07341	0.870784	0.810601		2.07341
	2.18254	282.759	367.994		2.18254	333.63	378.101		2.18254	354.191	395.503		2.18254	336.327	401.778		2.18254	365.885	433.515		2.18254	325.57	389.133		2.18254	285.739	361.423		2.18254	0.704597	0.506244		2.18254	0.853522	0.310306		2.18254	0.83166	0.902054		2.18254	0.716935	0.919986		2.18254	1	0.856378		2.18254
	2.29167	295.709	386.23		2.29167	331.013	381.879		2.29167	354.257	394.55		2.29167	344.253	392.313		2.29167	357.549	433.678		2.29167	329.142	412.747		2.29167	288.52	368.271		2.29167	0.961447	0.648855		2.29167	0.808499	0.33618		2.29167	0.83256	0.891269		2.29167	0.821693	0.825366		2.29167	0.89434	0.857649		2.29167
	2.40079	297.653	412.963		2.40079	335.502	381.904		2.40079	359.775	393.658		2.40079	357.587	388.973		2.40079	358.642	399.121		2.40079	322.932	445.845		2.40079	298.361	373.927		2.40079	1	0.857914		2.40079	0.885734	0.336351		2.40079	0.907368	0.881172		2.40079	0.997909	0.791977		2.40079	0.9082	0.588161		2.40079
	2.50992	282.718	421.832		2.50992	340.913	372.053		2.50992	362.449	381.12		2.50992	349.247	390.951		2.50992	358.634	406.722		2.50992	312.144	448.389		2.50992	292.24	380.348		2.50992	0.703783	0.927272		2.50992	0.978834	0.268886		2.50992	0.943607	0.739245		2.50992	0.887687	0.81175		2.50992	0.908097	0.647436		2.50992
	2.61905	280.601	431.132		2.61905	334.161	360.447		2.61905	363.324	377.736		2.61905	335.897	383.755		2.61905	355.024	414.168		2.61905	315.202	427.43		2.61905	282.385	378.267		2.61905	0.661797	1		2.61905	0.862668	0.189403		2.61905	0.955474	0.700927		2.61905	0.711253	0.739813		2.61905	0.862342	0.705503		2.61905
	2.72817	278.949	415.434		2.72817	322.701	359.424		2.72817	363.053	382.011		2.72817	331.968	385.641		2.72817	357.136	419.839		2.72817	315.573	402.797		2.72817	281.634	364.091		2.72817	0.629035	0.877238		2.72817	0.665484	0.182397		2.72817	0.951798	0.749322		2.72817	0.659333	0.758667		2.72817	0.889109	0.749727		2.72817
	2.8373	273.782	396.359		2.8373	313.698	347.927		2.8373	366.35	366.822		2.8373	330.359	392.481		2.8373	353.392	415.752		2.8373	307.721	383.407		2.8373	280.847	365.453		2.8373	0.526547	0.728066		2.8373	0.510579	0.103659		2.8373	0.996504	0.577389		2.8373	0.638067	0.827045		2.8373	0.841649	0.717855		2.8373
	2.94643	266.632	390.72		2.94643	314.351	366.737		2.94643	366.608	365.219		2.94643	334.007	393.034		2.94643	354.9	410.158		2.94643	308.475	368.554		2.94643	278.303	365.123		2.94643	0.384736	0.683968		2.94643	0.521826	0.23248		2.94643	1	0.559244		2.94643	0.686276	0.832574		2.94643	0.860766	0.674231		2.94643
	3.05556	264.707	382.009		3.05556	319.545	363.389		3.05556	361.732	364.387		3.05556	342.496	401.573		3.05556	355.404	393.037		3.05556	304.471	359.924		3.05556	270.25	354.354		3.05556	0.346567	0.615845		3.05556	0.611186	0.209551		3.05556	0.93389	0.549824		3.05556	0.79847	0.917936		3.05556	0.867156	0.540715		3.05556
	3.16468	264.122	375.267		3.16468	319.441	365.388		3.16468	346.46	362.806		3.16468	326.556	399.423		3.16468	353.335	375.18		3.16468	308.713	355.392		3.16468	266.693	359.192		3.16468	0.33495	0.563121		3.16468	0.609403	0.223241		3.16468	0.726849	0.531922		3.16468	0.587805	0.896443		3.16468	0.840934	0.40146		3.16468
	3.27381	261.775	379.769		3.27381	319.591	375.611		3.27381	336.496	348.033		3.27381	316.548	380.661		3.27381	354.941	361.931		3.27381	303.472	368.31		3.27381	276.205	362.321		3.27381	0.288406	0.598328		3.27381	0.611984	0.293254		3.27381	0.591768	0.364691		3.27381	0.455536	0.708883		3.27381	0.861287	0.298139		3.27381
	3.38294	258.499	382.766		3.38294	323.169	379.588		3.38294	335.866	349.865		3.38294	312.995	368.131		3.38294	353.958	350.797		3.38294	299.541	362.673		3.38294	256.545	373.128		3.38294	0.22342	0.621765		3.38294	0.673536	0.32049		3.38294	0.583227	0.385428		3.38294	0.408579	0.583623		3.38294	0.848827	0.211312		3.38294
	3.49206	263.943	373.639		3.49206	327.102	377.108		3.49206	332.196	358.927		3.49206	308.894	368.542		3.49206	337.217	342.741		3.49206	290.376	367.744		3.49206	266.221	371.152		3.49206	0.33141	0.55039		3.49206	0.7412	0.303506		3.49206	0.53348	0.488012		3.49206	0.354374	0.587732		3.49206	0.636651	0.148489		3.49206
	3.60119	257.755	374.253		3.60119	336.053	383.205		3.60119	326.499	366.148		3.60119	300.051	362.462		3.60119	324.277	332.505		3.60119	292.147	385.87		3.60119	257.885	356.226		3.60119	0.208675	0.555191		3.60119	0.895216	0.345261		3.60119	0.456242	0.569753		3.60119	0.237515	0.526951		3.60119	0.472634	0.0686646		3.60119
	3.71032	250.444	354.787		3.71032	340.765	415.515		3.71032	332.079	377.132		3.71032	298.417	347.585		3.71032	330.472	328.431		3.71032	303.331	418.479		3.71032	257.278	336.886		3.71032	0.0636631	0.402962		3.71032	0.976284	0.566537		3.71032	0.531884	0.694096		3.71032	0.21592	0.378229		3.71032	0.55116	0.0368941		3.71032
	3.81944	250.374	347.451		3.81944	325.145	444.892		3.81944	337.441	388.851		3.81944	300.283	342.89		3.81944	317.093	328.52		3.81944	302.032	428.204		3.81944	251.452	311.127		3.81944	0.0622688	0.345593		3.81944	0.707541	0.767726		3.81944	0.604582	0.826755		3.81944	0.240576	0.331294		3.81944	0.381587	0.0375881		3.81944
	3.92857	247.234	330.091		3.92857	305.005	478.808		3.92857	323.762	391.136		3.92857	323.437	341.119		3.92857	327.411	327.673		3.92857	302.454	414.919		3.92857	248.456	305.015		3.92857	0	0.209833		3.92857	0.361016	1		3.92857	0.419144	0.852621		3.92857	0.546585	0.31359		3.92857	0.51236	0.0309829		3.92857
	4.0377	248.551	314.038		4.0377	298.541	453.303		4.0377	321.54	346.029		4.0377	318.106	335.286		4.0377	320.199	332.166		4.0377	321.155	378.807		4.0377	246.809	302.484		4.0377	0.0261273	0.0842946		4.0377	0.249809	0.825329		4.0377	0.389018	0.342007		4.0377	0.476128	0.255278		4.0377	0.420955	0.066021		4.0377
	4.14683	250.353	307.678		4.14683	294.626	414.132		4.14683	304.649	325.513		4.14683	321.354	329.323		4.14683	321.75	339.5		4.14683	328.297	368.577		4.14683	245.327	300.796		4.14683	0.0618543	0.0345577		4.14683	0.182441	0.557065		4.14683	0.160028	0.109762		4.14683	0.519054	0.195667		4.14683	0.440609	0.123214		4.14683
	4.25595	252.45	309.065		4.25595	293.297	371.794		4.25595	305.311	316.656		4.25595	322.518	328.37		4.25595	322.899	350.621		4.25595	333.062	375.213		4.25595	238.971	299.703		4.25595	0.103456	0.0454044		4.25595	0.159571	0.267113		4.25595	0.169003	0.00950655		4.25595	0.534431	0.18614		4.25595	0.455171	0.20994		4.25595
	4.36508	258.92	306.911		4.36508	294.351	353.35		4.36508	309.555	319.844		4.36508	299.796	322.651		4.36508	324.669	363.676		4.36508	320.855	366.019		4.36508	228.424	298.119		4.36508	0.231772	0.0285596		4.36508	0.17772	0.140799		4.36508	0.226533	0.0455948		4.36508	0.234133	0.128969		4.36508	0.477601	0.311747		4.36508
	4.47421	254.416	303.259		4.47421	293.008	346.768		4.47421	303.538	329.443		4.47421	305.428	329.656		4.47421	328.612	371.9		4.47421	307.061	331.999		4.47421	230.747	296.04		4.47421	0.142436	0		4.47421	0.154604	0.0957217		4.47421	0.144969	0.154256		4.47421	0.308576	0.198996		4.47421	0.527579	0.375881		4.47421
	4.58333	259.997	310.558		4.58333	291.238	332.791		4.58333	301.933	320.493		4.58333	299.706	324.293		4.58333	309.713	369.417		4.58333	290.503	314.742		4.58333	241.513	303.128		4.58333	0.253131	0.0570801		4.58333	0.124156	0		4.58333	0.123212	0.0529392		4.58333	0.232954	0.145383		4.58333	0.288045	0.356518		4.58333
	4.69246	261.681	322.807		4.69246	294.888	347.351		4.69246	292.845	319.7		4.69246	291.925	309.75		4.69246	299.927	341.734		4.69246	288.426	309.635		4.69246	242.115	294.934		4.69246	0.286544	0.15287		4.69246	0.186956	0.0997144		4.69246	0	0.0439681		4.69246	0.130122	0		4.69246	0.164014	0.140636		4.69246
					4.80159	293.246	355.743		4.80159	300.02	330.882		4.80159	285.979	313.345		4.80159	286.987	334.344		4.80159	286.133	316.897		4.80159	247.365	305.844						4.80159	0.158701	0.157187		4.80159	0.0972653	0.170548		4.80159	0.0515389	0.0359385		4.80159	0	0.0830058		4.80159
					4.91071	284.022	356.075		4.91071	301.75	320.149		4.91071	287.623	312.101		4.91071	297.531	323.7		4.91071	285.068	315.547		4.91071	239.285	303.278						4.91071	0	0.159461		4.91071	0.120726	0.0490406		4.91071	0.0732649	0.0235025		4.91071	0.13364	0		4.91071
									5.01984	305.403	315.816		5.01984	282.08	312.551		5.01984	293.879	348.762		5.01984	271.534	317.89		5.01984	248.602	294.671										5.01984	0.170247	0		5.01984	0	0.028001		5.01984	0.0873555	0.195443		5.01984
													5.12897	292.868	318.313		5.12897	312.685	353.021																						5.12897	0.142577	0.0856026		5.12897	0.325719	0.228656
[truncated: 26 more columns]

## Sheet: 3
endosome 3
line profiles																									line profiles normalised for individual min-max																								line profiles normalised for overal min-max
individual max		314.754	428.712			308.37	408.451			401.063	477.917			339.535	413.744			337.468	418			288.535	438.864			401.063	477.917																						overal max
individual min		234.097	285.127			249.71	288.926			280.512	323.93			284.057	302.736			280.185	271.337			247.436	259.787			234.097	259.787																						overal min
	t16				t17				t18				t19				t20				t21				t16				t17				t18				t19				t20				t21
		Rab5	Rab11			Rab5	Rab11			Rab5	Rab11			Rab5	Rab11			Rab5	Rab11			Rab5	Rab11			Rab5	Rab11			Rab5	Rab11			Rab5	Rab11			Rab5	Rab11			Rab5	Rab11			Rab5	Rab11
	0	270.533	338.676		0	288.267	386.265		0	323.682	395.59		0	301.741	349.978		0	303.988	371.901		0	264.537	288.009		0	0.451738	0.372943		0	0.657286	0.814382		0	0.358106	0.465364		0	0.318761	0.425573		0	0.415534	0.685681		0	0.416092	0.157597
	0.10913	262.344	318.58		0.10913	274.821	375.944		0.10913	316.27	370.61		0.10913	297.749	339.304		0.10913	309.183	348.745		0.10913	263.994	278.226		0.10913	0.350217	0.232984		0.10913	0.428066	0.728032		0.10913	0.296621	0.303142		0.10913	0.246809	0.329418		0.10913	0.50622	0.527795		0.10913	0.402875	0.102967
	0.21825	258.661	307.392		0.21825	278.256	353.291		0.21825	319.713	355.483		0.21825	295.161	332.33		0.21825	302.683	318.528		0.21825	267.159	270.941		0.21825	0.304544	0.155065		0.21825	0.486636	0.538507		0.21825	0.325182	0.204907		0.21825	0.20016	0.266593		0.21825	0.392753	0.321765		0.21825	0.479884	0.0622861
	0.32738	249.628	308.414		0.32738	282.285	336.284		0.32738	322.891	339.948		0.32738	292.911	317.385		0.32738	297.187	302.89		0.32738	263.273	272.04		0.32738	0.192555	0.162183		0.32738	0.555321	0.396218		0.32738	0.351544	0.104022		0.32738	0.159595	0.131963		0.32738	0.296802	0.215139		0.32738	0.385342	0.0684231
	0.43651	243.879	304.755		0.43651	288.173	339.402		0.43651	325.534	337.703		0.43651	297.481	315.792		0.43651	293.576	303.289		0.43651	260.504	281.133		0.43651	0.121284	0.1367		0.43651	0.655684	0.422305		0.43651	0.373468	0.0894426		0.43651	0.24198	0.117613		0.43651	0.233771	0.21786		0.43651	0.317966	0.1192
	0.54563	235.143	292.107		0.54563	290.278	337.054		0.54563	309.693	347.549		0.54563	290.901	322.115		0.54563	285.659	292.388		0.54563	256.744	278.365		0.54563	0.0129771	0.0486123		0.54563	0.691567	0.402661		0.54563	0.242064	0.153383		0.54563	0.123372	0.174573		0.54563	0.0955565	0.143533		0.54563	0.226487	0.103743
	0.65476	236.297	294.418		0.65476	274.036	317.756		0.65476	302.656	337.35		0.65476	287.324	318.067		0.65476	288.265	287.67		0.65476	261.733	284.633		0.65476	0.0272808	0.0647073		0.65476	0.414691	0.241205		0.65476	0.18369	0.0871502		0.65476	0.0589021	0.138107		0.65476	0.141055	0.111364		0.65476	0.347862	0.138745
	0.76389	234.097	293.79		0.76389	267.169	308.545		0.76389	292.469	339.726		0.76389	289.396	329.028		0.76389	293.002	276.279		0.76389	261.681	281.745		0.76389	0	0.0603336		0.76389	0.297625	0.164141		0.76389	0.0991862	0.10258		0.76389	0.0962499	0.236848		0.76389	0.223752	0.0336963		0.76389	0.346606	0.122618
	0.87302	241.998	286.189		0.87302	264.446	309.054		0.87302	296.873	341.001		0.87302	284.057	335.798		0.87302	290.182	271.337		0.87302	264.046	279.247		0.87302	0.0979635	0.00739632		0.87302	0.251204	0.1684		0.87302	0.135718	0.11086		0.87302	0	0.297834		0.87302	0.174524	0		0.87302	0.404143	0.108668
	0.98214	242.922	292.481		0.98214	262.722	303.018		0.98214	301.169	337.598		0.98214	287.131	321.792		0.98214	289.681	276.581		0.98214	258.474	272.551		0.98214	0.109418	0.051217		0.98214	0.221821	0.1179		0.98214	0.171355	0.0887607		0.98214	0.0554251	0.171663		0.98214	0.165781	0.0357554		0.98214	0.268573	0.0712766
	1.09127	254.893	287.341		1.09127	256.316	293.998		1.09127	294.234	333.135		1.09127	292.96	313.712		1.09127	280.185	281.092		1.09127	263.726	267.666		1.09127	0.257841	0.0154194		1.09127	0.112614	0.0424346		1.09127	0.113827	0.0597778		1.09127	0.160487	0.0988758		1.09127	0	0.066513		1.09127	0.396366	0.0439978
	1.2004	265.098	285.127		1.2004	249.71	288.926		1.2004	284.48	336.405		1.2004	302.005	307.041		1.2004	289.179	290.998		1.2004	255.579	261.634		1.2004	0.384358	0		1.2004	0	0		1.2004	0.0329155	0.0810133		1.2004	0.323529	0.038781		1.2004	0.157014	0.134056		1.2004	0.198124	0.010314
	1.30952	266.588	298.372		1.30952	252.382	296.075		1.30952	287.453	332.237		1.30952	296.822	313.487		1.30952	291.107	296.447		1.30952	252.711	265.416		1.30952	0.402831	0.092245		1.30952	0.0455487	0.0598118		1.30952	0.0575773	0.0539461		1.30952	0.230089	0.0968489		1.30952	0.190673	0.171209		1.30952	0.128343	0.0314334
	1.41865	258.163	316.233		1.41865	249.838	295.876		1.41865	286.048	326.182		1.41865	298.33	302.736		1.41865	284.966	322.042		1.41865	251.546	259.787		1.41865	0.298381	0.216638		1.41865	0.00218717	0.0581468		1.41865	0.0459225	0.0146246		1.41865	0.257274	0		1.41865	0.0834605	0.345725		1.41865	0.0999998	0
	1.52778	260.176	337.24		1.52778	253.386	299.322		1.52778	289.106	323.93		1.52778	288.771	310.135		1.52778	293.341	334.462		1.52778	260.25	269.166		1.52778	0.323338	0.362942		1.52778	0.062671	0.0869776		1.52778	0.0712893	0		1.52778	0.0849861	0.0666529		1.52778	0.229669	0.430408		1.52778	0.311798	0.0523741
	1.6369	257.446	362.848		1.6369	261.519	316.269		1.6369	286.716	346.242		1.6369	298.435	315.738		1.6369	286.844	324.634		1.6369	247.436	287.727		1.6369	0.289483	0.541289		1.6369	0.201307	0.228764		1.6369	0.0514637	0.144895		1.6369	0.259181	0.117127		1.6369	0.116241	0.363398		1.6369	0	0.156022
	1.74603	250.732	359.437		1.74603	264.72	328.303		1.74603	280.512	356.077		1.74603	298.484	314.718		1.74603	285.75	326.391		1.74603	250.335	299.445		1.74603	0.206242	0.517533		1.74603	0.255885	0.329446		1.74603	0	0.208764		1.74603	0.260059	0.107938		1.74603	0.0971486	0.375378		1.74603	0.070532	0.221458
	1.85516	249.314	355.191		1.85516	264.38	345.136		1.85516	281.326	357.558		1.85516	290.19	312.681		1.85516	299.197	323.096		1.85516	257.625	309.3		1.85516	0.188659	0.487962		1.85516	0.250077	0.470278		1.85516	0.00675233	0.218382		1.85516	0.110562	0.0895881		1.85516	0.331888	0.352911		1.85516	0.247908	0.27649
	1.96429	251.333	346.681		1.96429	270.884	344.135		1.96429	288.396	365.632		1.96429	295.495	321.269		1.96429	305.675	329.985		1.96429	262.233	324.659		1.96429	0.213697	0.428694		1.96429	0.360949	0.461903		1.96429	0.0653997	0.270815		1.96429	0.206184	0.166952		1.96429	0.444989	0.399883		1.96429	0.360032	0.362258
	2.07341	261.951	346.976		2.07341	267.11	340.443		2.07341	295.716	371.962		2.07341	297.85	324.841		2.07341	307.031	336.102		2.07341	262.533	339.188		2.07341	0.345338	0.430748		2.07341	0.296628	0.431014		2.07341	0.126121	0.311922		2.07341	0.248628	0.19913		2.07341	0.468654	0.441591		2.07341	0.367344	0.44339
	2.18254	263.317	356.927		2.18254	283.554	349.029		2.18254	300.281	365.864		2.18254	298.331	338.96		2.18254	300.445	346.01		2.18254	266.98	331.76		2.18254	0.362282	0.500052		2.18254	0.576951	0.502849		2.18254	0.163989	0.272322		2.18254	0.257305	0.326319		2.18254	0.35368	0.509147		2.18254	0.475534	0.401911
	2.29167	269.443	357.733		2.29167	289.246	358.541		2.29167	307.97	366.37		2.29167	306.075	343.939		2.29167	313.419	360.761		2.29167	276.657	338.587		2.29167	0.438225	0.505666		2.29167	0.673984	0.58243		2.29167	0.227771	0.275608		2.29167	0.396878	0.371171		2.29167	0.58017	0.609724		2.29167	0.710986	0.440034
	2.40079	277.139	369.755		2.40079	283.998	374.673		2.40079	312.552	373.183		2.40079	304.794	355.405		2.40079	304.972	370.78		2.40079	282.423	344.335		2.40079	0.533646	0.589393		2.40079	0.58452	0.717398		2.40079	0.26578	0.319852		2.40079	0.373793	0.474461		2.40079	0.432705	0.678037		2.40079	0.851274	0.472132
	2.50992	274.511	372.319		2.50992	293.064	382.286		2.50992	320.95	385.735		2.50992	312.403	376.353		2.50992	308.418	388.011		2.50992	288.535	345.429		2.50992	0.501065	0.60725		2.50992	0.739067	0.781092		2.50992	0.335443	0.401365		2.50992	0.51094	0.663168		2.50992	0.492865	0.795524		2.50992	1	0.478241
	2.61905	285.532	385.961		2.61905	295.334	393.606		2.61905	325.218	392.438		2.61905	315.355	385.753		2.61905	316.089	415.575		2.61905	285.151	357.653		2.61905	0.637701	0.70226		2.61905	0.777756	0.8758		2.61905	0.370847	0.444895		2.61905	0.564161	0.747847		2.61905	0.626791	0.983465		2.61905	0.917662	0.546502
	2.72817	295.176	397.564		2.72817	293.979	395.151		2.72817	329.72	397.798		2.72817	321.646	387.731		2.72817	321.369	418		2.72817	283.436	374.411		2.72817	0.75727	0.783069		2.72817	0.75466	0.888726		2.72817	0.408192	0.479703		2.72817	0.677545	0.765666		2.72817	0.718948	1		2.72817	0.875939	0.640082
	2.8373	294.496	408.166		2.8373	301.817	395.144		2.8373	336.248	392.993		2.8373	327.37	392.221		2.8373	328.576	395.976		2.8373	283.731	374.408		2.8373	0.748835	0.856907		2.8373	0.888284	0.888668		2.8373	0.462344	0.448499		2.8373	0.780728	0.806113		2.8373	0.844772	0.849833		2.8373	0.883114	0.640065
	2.94643	311.501	416.949		2.94643	308.37	392.313		2.94643	351.657	391.582		2.94643	331.052	400.794		2.94643	327.141	390.014		2.94643	278.708	371.525		2.94643	0.959662	0.918076		2.94643	1	0.864982		2.94643	0.590165	0.439336		2.94643	0.847098	0.883342		2.94643	0.819719	0.809182		2.94643	0.760902	0.623966
	3.05556	314.754	428.712		3.05556	306.242	377.087		3.05556	364.021	399.253		3.05556	339.535	413.744		3.05556	327.672	392.9		3.05556	278.815	378.879		3.05556	1	1		3.05556	0.963715	0.737595		3.05556	0.692728	0.489152		3.05556	1	1		3.05556	0.828992	0.828859		3.05556	0.763489	0.665032
	3.16468	312.77	422.43		3.16468	301.423	378.556		3.16468	384.081	409.291		3.16468	330.353	406.657		3.16468	337.468	386.175		3.16468	285.072	401.075		3.16468	0.975394	0.956249		3.16468	0.881567	0.749885		3.16468	0.85913	0.554339		3.16468	0.834493	0.936158		3.16468	1	0.783006		3.16468	0.915745	0.788979
	3.27381	306.973	395.99		3.27381	304.814	368.027		3.27381	390.69	419.446		3.27381	334.723	398.605		3.27381	324.891	384.161		3.27381	283.352	406.34		3.27381	0.903522	0.772107		3.27381	0.93937	0.661795		3.27381	0.913953	0.620286		3.27381	0.913258	0.863622		3.27381	0.780437	0.769274		3.27381	0.873888	0.81838
	3.38294	295.207	371.077		3.38294	296.189	377.085		3.38294	401.063	434.026		3.38294	328.563	392.89		3.38294	326.675	375.912		3.38294	278.603	421.498		3.38294	0.757653	0.5986		3.38294	0.79234	0.737578		3.38294	1	0.714969		3.38294	0.802226	0.81214		3.38294	0.811575	0.713029		3.38294	0.75833	0.903025
	3.49206	284.582	346.652		3.49206	293.507	390.853		3.49206	377.958	468.23		3.49206	327.956	396.366		3.49206	329.611	396.9		3.49206	276.076	438.864		3.49206	0.625916	0.428492		3.49206	0.746617	0.852767		3.49206	0.808338	0.937092		3.49206	0.791296	0.843453		3.49206	0.862831	0.856133		3.49206	0.696857	1
					3.60119	294.733	408.451		3.60119	386.682	477.917		3.60119	319.703	401.258		3.60119	319.737	402.579		3.60119	277.5	434.265						3.60119	0.767514	1		3.60119	0.880706	1		3.60119	0.642525	0.887522		3.60119	0.69046	0.894854		3.60119	0.731495	0.974318
					3.71032	288.071	405.799		3.71032	376.88	459.863		3.71032	317.39	401.423		3.71032	322.512	383.268		3.71032	282.209	416.214						3.71032	0.653947	0.977812		3.71032	0.799396	0.882756		3.71032	0.600842	0.889008		3.71032	0.738916	0.763185		3.71032	0.846084	0.873518
					3.81944	283.26	388.719		3.81944	358.1	437.501		3.81944	328.257	386.721		3.81944	318.651	363.105		3.81944	279.192	396.722						3.81944	0.571942	0.834913		3.81944	0.643611	0.737536		3.81944	0.796718	0.756567		3.81944	0.67151	0.625707		3.81944	0.772684	0.764671
					3.92857	279.806	383.949		3.92857	338.335	425.898		3.92857	327.736	364.59		3.92857	315.959	352.134		3.92857	269.766	376.501						3.92857	0.513061	0.795005		3.92857	0.479656	0.662186		3.92857	0.787323	0.557203		3.92857	0.624513	0.550902		3.92857	0.543314	0.651753
									4.0377	325.339	429.434		4.0377	310.049	356.778		4.0377	320.551	358.458		4.0377	259.131	372.939										4.0377	0.371851	0.685149		4.0377	0.468515	0.48683		4.0377	0.704682	0.594022		4.0377	0.284549	0.631862
													4.14683	310.136	351.608		4.14683	310.581	365.299		4.14683	262.618	343.174														4.14683	0.47009	0.440257		4.14683	0.530621	0.640666		4.14683	0.369407	0.465649
													4.25595	312.806	338.321																						4.25595	0.518206	0.320562
[truncated: 18 more columns]

## Sheet: 4
endosome 4
max		336.806	324.796			359.626	386.025			329.107	325.831			340.939	293.506			358.68	319.149			342.967	336.334			366.56	305.167			358.556	313.797			384.822	290.026			367.558	301.279			404.867	295.4			361.081	304.85
min		239.936	225.092			258.154	210.14			243.664	221.955			292.536	230.642			292.267	237.058			273.466	232.543			288.052	235.559			286.96	233.313			282.838	229.895			271.042	230.331			270.126	240.979			275.536	241.936
	t85				t86				t87				t88				t89				t90				t91				t92				t93				t94				t95				t96				t97
		Rab5	Rab11			Rab5	Rab11			Rab5	Rab11			Rab5	Rab11			Rab5	Rab11			Rab5	Rab11			Rab5	Rab11			Rab5	Rab11			Rab5	Rab11			Rab5	Rab11			Rab5	Rab11			Rab5	Rab11
	0	272.471	269.01		0	281.523	285.41		0	282.895	245.096		0	319.267	239.162		0	327.164	242.208		0	297.076	241.005		0	321.981	236.396		0	307.409	253.218		0	295.658	229.895		0	297.027	250.473		0	297.898	295.4		0	290.173	244.377		0
	0.10913	266.19	261.736		0.10913	277.715	285.63		0.10913	281.711	247.474		0.10913	317.572	230.642		0.10913	317.239	237.058		0.10913	295.282	232.543		0.10913	317.134	241.486		0.10913	311.101	260.555		0.10913	295.499	233.648		0.10913	298.307	254.657		0.10913	289.457	286.792		0.10913	282.266	242.321		0.10913
	0.21825	274.424	254.013		0.21825	291.635	280.081		0.21825	286.864	253.969		0.21825	318.535	231.71		0.21825	317.022	241.97		0.21825	303.893	233.197		0.21825	304.51	239.51		0.21825	314.559	249.04		0.21825	287.754	234.059		0.21825	303.781	265.418		0.21825	291.027	284.088		0.21825	284.456	241.936		0.21825
	0.32738	264.2	269.599		0.32738	282.618	266.814		0.32738	288.002	250.486		0.32738	315.842	236.019		0.32738	326.074	245.761		0.32738	290.676	239.177		0.32738	300.959	240.899		0.32738	315.357	233.795		0.32738	291.093	236.215		0.32738	312.149	279.797		0.32738	285.769	268.678		0.32738	285.123	244.98		0.32738
	0.43651	260.323	283.823		0.43651	284.412	261.719		0.43651	278.686	254.15		0.43651	295.217	237.739		0.43651	312.019	244.217		0.43651	282.956	240.258		0.43651	305.587	247.161		0.43651	320.767	239.537		0.43651	303.49	239.851		0.43651	308.236	298.195		0.43651	283.736	270.094		0.43651	283.8	255.405		0.43651
	0.54563	261.907	284.476		0.54563	298.717	252.671		0.54563	266.65	238.717		0.54563	301.376	243.217		0.54563	314.16	244.987		0.54563	288.447	246.109		0.54563	306.565	256.406		0.54563	324.582	239.778		0.54563	305.036	240.366		0.54563	306.079	301.279		0.54563	283.847	260.234		0.54563	287.199	269.355		0.54563
	0.65476	252.713	276.006		0.65476	295.894	237.812		0.65476	278.967	230.564		0.65476	300.846	250.599		0.65476	312.541	250.401		0.65476	289.395	246.006		0.65476	303.429	262.457		0.65476	325.181	243.699		0.65476	302.829	241.566		0.65476	312.981	290.349		0.65476	288.603	256.721		0.65476	287.642	285.961		0.65476
	0.76389	247.99	278.068		0.76389	298.456	224.781		0.76389	280.34	224.824		0.76389	297.441	256.515		0.76389	323.104	259.116		0.76389	286.449	253.328		0.76389	297.348	261.977		0.76389	324.94	237.692		0.76389	321.928	258.148		0.76389	315.646	275.929		0.76389	299.756	253.568		0.76389	286.301	304.85		0.76389
	0.87302	240.907	276.98		0.87302	281.438	222.913		0.87302	273.948	222.796		0.87302	301.397	263.587		0.87302	318.527	255.98		0.87302	284.789	248.984		0.87302	306.372	254.122		0.87302	341.489	239.965		0.87302	324.785	253.104		0.87302	315.356	262.674		0.87302	297.714	269.249		0.87302	292.415	304.68		0.87302
	0.98214	241.332	287.466		0.98214	272.297	220.348		0.98214	274.418	229.658		0.98214	301.329	257.322		0.98214	321.577	250.466		0.98214	293.887	251.795		0.98214	308.218	239.785		0.98214	351.208	241.079		0.98214	332.96	256.029		0.98214	327.147	268.954		0.98214	302.537	267.699		0.98214	281.682	295.397		0.98214
	1.09127	239.936	293.067		1.09127	268.659	223.94		1.09127	262.961	231.151		1.09127	304.461	250.327		1.09127	323.413	256.513		1.09127	290.449	247.064		1.09127	310.86	236.803		1.09127	352.29	240.763		1.09127	325.643	254.891		1.09127	325.222	271.204		1.09127	311.944	254.923		1.09127	275.536	290.747		1.09127
	1.2004	247.079	271.88		1.2004	267.091	217.001		1.2004	258.803	229.488		1.2004	300.698	246.503		1.2004	329.124	264.467		1.2004	299.905	250.266		1.2004	308.188	241.536		1.2004	341.81	233.313		1.2004	321.236	246.595		1.2004	326.365	268.734		1.2004	311.308	256.39		1.2004	285.042	280.696		1.2004
	1.30952	247.962	271.68		1.30952	260.668	218.702		1.30952	264.753	221.955		1.30952	298.977	241.348		1.30952	316.74	257.409		1.30952	296.169	249.02		1.30952	309.69	244.877		1.30952	331.277	234.884		1.30952	312.591	255.205		1.30952	324.566	266.372		1.30952	319.026	248.773		1.30952	303.039	276.78		1.30952
	1.41865	249.237	270.108		1.41865	270.706	217.99		1.41865	264.681	224.095		1.41865	292.903	241.915		1.41865	304.953	263.298		1.41865	297.449	243.615		1.41865	298.466	236.953		1.41865	311.805	235.927		1.41865	305.12	268.737		1.41865	318.061	265.448		1.41865	313.695	252.198		1.41865	309.865	269.883		1.41865
	1.52778	246.231	258.353		1.52778	265.397	215.483		1.52778	263.71	228.275		1.52778	297.707	244.624		1.52778	299.128	263.957		1.52778	302.174	239.211		1.52778	293.44	236.162		1.52778	310.784	245.828		1.52778	305.674	269.382		1.52778	311.951	251.847		1.52778	307.216	246.352		1.52778	320.993	269.212		1.52778
	1.6369	243.271	251.863		1.6369	261.062	210.14		1.6369	254.807	228.242		1.6369	298.719	244.925		1.6369	292.267	266.253		1.6369	294.167	243.513		1.6369	291.863	237.864		1.6369	306.351	254.245		1.6369	301.717	261.45		1.6369	309.13	242.475		1.6369	294.449	240.979		1.6369	349.555	267.969		1.6369
	1.74603	254.216	243.122		1.74603	260.182	214.522		1.74603	261.65	229.535		1.74603	292.536	247.751		1.74603	296.542	266.413		1.74603	283.656	251.284		1.74603	291.92	235.559		1.74603	295.365	259.614		1.74603	298.059	252.365		1.74603	302.565	240.968		1.74603	291.466	250.411		1.74603	353.011	260.28		1.74603
	1.85516	250.057	231.99		1.85516	269.358	216.411		1.85516	250.366	244.327		1.85516	293.895	244.157		1.85516	299.275	255.294		1.85516	281.271	250.292		1.85516	292.027	245.667		1.85516	294.022	266.507		1.85516	301.157	248.83		1.85516	296.227	236.76		1.85516	299.001	258.025		1.85516	350.36	255.584		1.85516
	1.96429	241.611	225.092		1.96429	267.922	217.349		1.96429	243.664	244.894		1.96429	293.191	239.511		1.96429	298.985	254.841		1.96429	273.466	248.222		1.96429	294.448	249.072		1.96429	286.96	272.33		1.96429	302.578	240.821		1.96429	293.553	234.661		1.96429	299.167	255.695		1.96429	330.799	250.085		1.96429
	2.07341	244.577	232.214		2.07341	270.476	227.086		2.07341	248.799	242.509		2.07341	299.004	238.501		2.07341	318.929	244.04		2.07341	281.125	245.452		2.07341	292.686	246.871		2.07341	308.572	275.083		2.07341	313.936	245.208		2.07341	288.146	237.911		2.07341	298.581	254.624		2.07341	328.008	260.928		2.07341
	2.18254	254.457	232.572		2.18254	263.986	231.537		2.18254	251.47	244.608		2.18254	294.374	241.485		2.18254	323.261	246.575		2.18254	281.622	244.82		2.18254	288.052	241.067		2.18254	321.118	264.158		2.18254	302.377	253.294		2.18254	291.652	240.114		2.18254	308.983	256.604		2.18254	327.963	263.829		2.18254
	2.29167	254.943	228.397		2.29167	265.039	228.809		2.29167	250.403	249.746		2.29167	301.502	252.723		2.29167	329.753	254.923		2.29167	284.796	259.396		2.29167	293.588	243.368		2.29167	331.878	261.874		2.29167	304.42	256.952		2.29167	292.254	232.612		2.29167	297.723	255.041		2.29167	325.312	264.74		2.29167
	2.40079	256.916	236.506		2.40079	272.82	234.277		2.40079	250.048	273.397		2.40079	296.935	259.947		2.40079	328.048	263.148		2.40079	284.075	275.173		2.40079	292.532	246.573		2.40079	333.011	264.947		2.40079	309.165	251.8		2.40079	292.354	239.012		2.40079	280.86	253.227		2.40079	310.502	263.311		2.40079
	2.50992	258.772	246.575		2.50992	266.975	238.451		2.50992	266.935	283.672		2.50992	298.54	262.543		2.50992	337.161	264.717		2.50992	277.054	297.697		2.50992	291.34	241.506		2.50992	335.106	258.399		2.50992	298.756	260.872		2.50992	281.684	245.71		2.50992	277.751	263.129		2.50992	303.352	267.707		2.50992
	2.61905	257.833	254.118		2.61905	271.955	246.465		2.61905	271.601	296.72		2.61905	304.187	267.734		2.61905	342.963	249.3		2.61905	285.086	316.712		2.61905	297.945	239.091		2.61905	318.114	251.712		2.61905	282.838	261.447		2.61905	272.324	248.039		2.61905	270.126	264.537		2.61905	294.622	280.947		2.61905
	2.72817	250.085	271.752		2.72817	266.118	263.441		2.72817	260.027	288.127		2.72817	304.033	255.864		2.72817	355.521	255.345		2.72817	285.687	335.979		2.72817	303.289	240.101		2.72817	295.612	257.809		2.72817	290.069	264.289		2.72817	271.042	255.528		2.72817	270.915	256.104		2.72817	286.461	276.89		2.72817
	2.8373	244.774	280.06		2.8373	261.571	266.785		2.8373	271.992	288.857		2.8373	292.804	256.103		2.8373	348.647	257.618		2.8373	285.378	336.334		2.8373	301.59	243.25		2.8373	288.576	247.865		2.8373	297.348	273.962		2.8373	272.859	256.902		2.8373	283.088	258.55		2.8373	275.555	277.864		2.8373
	2.94643	259.083	292.786		2.94643	264.498	288.888		2.94643	276.209	274.761		2.94643	326.263	260.281		2.94643	341.943	276.505		2.94643	292.562	329.339		2.94643	299.692	241.098		2.94643	293.712	241.996		2.94643	300.557	289.618		2.94643	281.928	260.443		2.94643	284.474	262.016		2.94643	281.528	287.905		2.94643
	3.05556	261.757	310.088		3.05556	266.335	314.224		3.05556	268.934	268.633		3.05556	324.656	260.849		3.05556	346.729	290.39		3.05556	302.139	327.967		3.05556	297.548	243.781		3.05556	296.694	244.901		3.05556	316.155	290.026		3.05556	287.535	266.707		3.05556	281.532	268.183		3.05556	286.65	286.467		3.05556
	3.16468	260.159	324.796		3.16468	258.154	362.399		3.16468	273.027	257.826		3.16468	326.889	252.405		3.16468	342.643	291.083		3.16468	310.251	319.515		3.16468	308.159	247.811		3.16468	309.419	250.688		3.16468	338.704	286.963		3.16468	290.721	281.031		3.16468	287.041	274.698		3.16468	285.546	285.257		3.16468
	3.27381	267.688	308.062		3.27381	272.032	386.025		3.27381	282.917	253.192		3.27381	331.086	249.394		3.27381	335.769	293.353		3.27381	319.151	292.344		3.27381	318.47	253.672		3.27381	316.739	249.622		3.27381	356.947	277.997		3.27381	297.142	287.851		3.27381	291.132	274.272		3.27381	291.922	283.25		3.27381
	3.38294	269.49	304.099		3.38294	275.763	378.469		3.38294	296.163	251.642		3.38294	332.717	259.442		3.38294	340.478	292.097		3.38294	325.634	267.257		3.38294	318.483	256.732		3.38294	313.252	258.186		3.38294	373.231	262.351		3.38294	297.792	277.952		3.38294	291.019	269.155		3.38294	297.521	274.432		3.38294
	3.49206	277.244	290.064		3.49206	271.396	357.378		3.49206	299.098	251.084		3.49206	336.78	263.901		3.49206	336.043	302.832		3.49206	317.882	263.399		3.49206	308.389	246.83		3.49206	312.837	261.255		3.49206	384.822	257.226		3.49206	289.526	263.969		3.49206	295.063	269.627		3.49206	297.147	272.688		3.49206
	3.60119	281.311	285.267		3.60119	273.297	330.568		3.60119	296.096	249.798		3.60119	330.71	267.244		3.60119	329.026	305.054		3.60119	303.847	264.59		3.60119	311.383	254.096		3.60119	308.21	257.709		3.60119	379.86	252.922		3.60119	301.5	254.628		3.60119	304.77	267.267		3.60119	307.203	259.407		3.60119
	3.71032	285.977	281.63		3.71032	277.889	307.139		3.71032	302.891	247.537		3.71032	323.209	278.344		3.71032	323.264	300.187		3.71032	291.435	259.622		3.71032	322.478	255.643		3.71032	303.554	247.586		3.71032	359.361	243.251		3.71032	294.38	255.244		3.71032	304.237	265.155		3.71032	304.843	262.882		3.71032
	3.81944	311.139	288.352		3.81944	279.988	281.934		3.81944	306.381	242.906		3.81944	316.411	282.334		3.81944	319.136	307.574		3.81944	295.057	267.335		3.81944	304.45	249.904		3.81944	301.178	253.383		3.81944	323.219	242.924		3.81944	283.68	253.208		3.81944	293.88	266.334		3.81944	302.714	273.147		3.81944
	3.92857	317.03	292.593		3.92857	267.271	284.988		3.92857	293.28	251.822		3.92857	323.074	293.506		3.92857	332.041	319.149		3.92857	304.819	269.607		3.92857	310.075	252.536		3.92857	302.172	257.303		3.92857	314.579	244.92		3.92857	284.534	245.203		3.92857	290.902	271.113		3.92857	308	281.704		3.92857
	4.0377	310.955	283.206		4.0377	271.539	282.323		4.0377	317.658	251.321		4.0377	314.271	288.498		4.0377	342.478	298.401		4.0377	303.695	277.168		4.0377	325.594	251.03		4.0377	307.42	253.997		4.0377	309.037	242.906		4.0377	287.908	240.255		4.0377	293.162	271.903		4.0377	297.807	275.756		4.0377
	4.14683	324.67	271.442		4.14683	277.273	285.519		4.14683	325.892	251.413		4.14683	322.776	267.738		4.14683	330.332	290.142		4.14683	303.291	296.88		4.14683	322.172	247.931		4.14683	307.497	258.868		4.14683	304.746	251.509		4.14683	305.759	232.988		4.14683	293.464	275.289		4.14683	294.727	277.75		4.14683
	4.25595	326.769	273.472		4.25595	279.842	282.003		4.25595	328.122	269.546		4.25595	330.381	250.547		4.25595	334.509	290.385		4.25595	310.211	307.183		4.25595	313.16	246.256		4.25595	307.004	265.488		4.25595	305.64	245.511		4.25595	319.066	230.331		4.25595	290.443	276.836		4.25595	294.524	277.199		4.25595
	4.36508	333.206	267.269		4.36508	287.228	285.371		4.36508	328.644	277.335		4.36508	327.921	252.349		4.36508	342.919	288.756		4.36508	313.167	307.523		4.36508	318.136	245.97		4.36508	311.483	257.257		4.36508	312.924	250.987		4.36508	331.744	236.781		4.36508	285.609	278.813		4.36508	286.668	268.926		4.36508
	4.47421	334.957	270.004		4.47421	292.104	283.743		4.47421	329.107	283.167		4.47421	325.028	263.959		4.47421	328.959	278.774		4.47421	313.349	303.656		4.47421	326.143	255.206		4.47421	310.802	254.368		4.47421	317.927	242.338		4.47421	363.257	231.097		4.47421	285.178	281.341		4.47421	301.22	269.189		4.47421
	4.58333	316.817	267.661		4.58333	301.51	284.997		4.58333	328.578	291.731		4.58333	340.939	266.588		4.58333	319.491	270.971		4.58333	307.682	306.191		4.58333	328.244	257.679		4.58333	304.154	264.223		4.58333	316.765	248.265		4.58333	367.558	233.214		4.58333	297.37	272.061		4.58333	296.697	271.42		4.58333
	4.69246	308.255	263.647		4.69246	312.224	287.165		4.69246	325.713	298.311		4.69246	336.971	262.908		4.69246	323.139	268.661		4.69246	311.418	303.178		4.69246	317.691	258.332		4.69246	308.976	275.208		4.69246	319.107	247.978		4.69246	341.942	246.23		4.69246	316.519	265.388		4.69246	298.813	272.337		4.69246
	4.80159	315.625	273.593		4.80159	312.56	288.534		4.80159	322.135	301.144		4.80159	339.426	263.307		4.80159	320.168	265.367		4.80159	320.669	297.401		4.80159	316.149	266.795		4.80159	318.665	285.576		4.80159	321.33	247.101		4.80159	322.503	249.136		4.80159	338.557	259.028		4.80159	297.78	273.566		4.80159
	4.91071	319.033	272.138		4.91071	316.641	284.915		4.91071	310.773	304.541		4.91071	339.151	265.823		4.91071	319.671	258.293		4.91071	318.67	286.605		4.91071	330.589	268.309		4.91071	312.426	295.992		4.91071	322.407	246.259		4.91071	315.518	250.599		4.91071	371.422	258.051		4.91071	308.113	277.315		4.91071
	5.01984	336.806	275.866		5.01984	325.781	299.485		5.01984	321.745	307.404		5.01984	324.458	262.156		5.01984	331.957	248.156		5.01984	315.723	270.628		5.01984	326.533	271.949		5.01984	331.121	301.713		5.01984	325.334	247.116		5.01984	307.427	249.407		5.01984	394.695	263.926		5.01984	329.562	275.932		5.01984
	5.12897	330.488	281.442		5.12897	346.256	298.162		5.12897	312.173	322.768		5.12897	322.309	263.754		5.12897	341.032	252.214		5.12897	318.87	270.507		5.12897	346.893	291.466		5.12897	340.067	308.349		5.12897	329.221	243.997		5.12897	310.317	238.473		5.12897	404.867	270.139		5.12897	343.419	275.837		5.12897
	5.2381	308.456	289.981		5.2381	359.626	290.449		5.2381	307.199	325.831		5.2381	312.291	269.3		5.2381	358.68	252.609		5.2381	340.924	263.097		5.2381	366.56	294.895		5.2381	347.551	313.186		5.2381	334.104	245.516		5.2381	318.228	241.051		5.2381	380.557	258.894		5.2381	361.081	267.435		5.2381
	5.34722	285.108	285.633		5.34722	349.535	273.917		5.34722	287.065	317.673		5.34722	309.293	272.761		5.34722	357.528	253.594		5.34722	335.199	268.061		5.34722	354.845	305.167		5.34722	358.556	313.797		5.34722	333.15	247.664		5.34722	324.082	243.508		5.34722	348.681	271.892		5.34722	348.929	256.125		5.34722
	5.45635	275.193	286.715		5.45635	332.844	278.672		5.45635	279.317	287.363		5.45635	309.987	259.142		5.45635	345.723	252.92		5.45635	342.967	265.411		5.45635	349.057	297.23		5.45635	342.713	304.678		5.45635	348.488	247.743		5.45635	339.214	244.452		5.45635	325.383	265.66		5.45635	335.934	260.534		5.45635
	5.56548	264.004	276.131		5.56548	307.901	276.957		5.56548	280.564	282.341		5.56548	320.355	252.329		5.56548	341.789	249.463		5.56548	334.174	257.836		5.56548	350.139	288.185		5.56548	330.428	285.943		5.56548	354.145	248.013		5.56548	345.898	247.185		5.56548	310.062	265.479		5.56548	303.193	255.836		5.56548
	5.6746	256.791	280.4		5.6746	285.856	289.059		5.6746	280.76	275.476		5.6746	323.249	251.412		5.6746	343.379	245.184		5.6746	317.558	252.929		5.6746	335.489	272.662		5.6746	314.159	277.557		5.6746	356.588	250.337		5.6746	322.445	239.902		5.6746	304.378	266.147		5.6746	292.92	253.841		5.6746
	5.78373	260.242	280.502		5.78373	289.131	287.263		5.78373	278.983	271.432		5.78373	309.005	238.008		5.78373	330.913	245.921		5.78373	301.712	250.157		5.78373	323.501	260.041		5.78373	301.556	264.428		5.78373	343.782	254.671		5.78373	318.056	243.187		5.78373	307.717	277.8		5.78373	280.215	255.19		5.78373
	5.89286	258.662	279.732		5.89286	287.241	298.148		5.89286	279.705	261.766		5.89286	319.16	236.764		5.89286	315.087	253.389		5.89286	296.149	246.747		5.89286	322.666	245.298		5.89286	298.86	266.732		5.89286	325.758	246.703		5.89286	308.872	248.773		5.89286	299.524	270.386		5.89286	281.315	256.726		5.89286
	6.00198	263.089	288.041		6.00198	282.459	297.391		6.00198	276.835	248.809																						6.00198	308.891	241.805		6.00198	299.438	250.067		6.00198	299.612	269.37		6.00198	283.686	259.121		6.00198
	6.11111	263.591	285.037		6.11111	289.752	281.175		6.11111	284.373	246.113																						6.11111	293.809	243.438		6.11111	296.993	255.301		6.11111	301.002	281.341		6.11111	280.297	257.667		6.11111
																																																	6.22024
																																																	6.32937
line profiles normalised for individual min-max
max		336.806	324.796			359.626	386.025			329.107	325.831			340.939	293.506			358.68	319.149			342.967	336.334			366.56	305.167			358.556	313.797			384.822	290.026			367.558	301.279			404.867	295.4			361.081	304.85
min		239.936	225.092			258.154	210.14			243.664	221.955			292.536	230.642			292.267	237.058			273.466	232.543			288.052	235.559			286.96	233.313			282.838	229.895			271.042	230.331			270.126	240.979			275.536	241.936
	t85				t86				t87				t88				t89				t90				t91				t92				t93				t94				t95				t96				t97
		Rab5	Rab11			Rab5	Rab11			Rab5	Rab11			Rab5	Rab11			Rab5	Rab11			Rab5	Rab11			Rab5	Rab11			Rab5	Rab11			Rab5	Rab11			Rab5	Rab11			Rab5	Rab11			Rab5	Rab11
	0	0.335853	0.440482		0	0.2303	0.42795		0	0.459146	0.222775		0	0.552266	0.135534		0	0.525455	0.0627438		0	0.339714	0.0815292		0	0.432175	0.0120202		0	0.285614	0.247316		0	0.125706	0		0	0.269232	0.283902		0	0.206114	1		0	0.171098	0.0388083		0
	0.10913	0.27102	0.367524		0.10913	0.192772	0.429201		0.10913	0.445293	0.245668		0.10913	0.517246	0		0.10913	0.376009	0		0.10913	0.3139	0		0.10913	0.370431	0.0851412		0.10913	0.33718	0.338483		0.10913	0.124147	0.0624127		0.10913	0.282491	0.342877		0.10913	0.143468	0.841832		0.10913	0.0786727	0.00612896		0.10913
	0.21825	0.356018	0.290069		0.21825	0.329953	0.397652		0.21825	0.505601	0.308194		0.21825	0.537139	0.0169923		0.21825	0.372751	0.0598348		0.21825	0.437796	0.00630112		0.21825	0.209633	0.0567608		0.21825	0.385482	0.195405		0.21825	0.0482036	0.0692512		0.21825	0.339204	0.494542		0.21825	0.15512	0.792138		0.21825	0.104269	0		0.21825
	0.32738	0.250472	0.446388		0.32738	0.241091	0.322222		0.32738	0.518917	0.274664		0.32738	0.481492	0.0855295		0.32738	0.509043	0.106013		0.32738	0.247627	0.0639169		0.32738	0.164403	0.0767082		0.32738	0.396633	0.00599498		0.32738	0.0809441	0.105095		0.32738	0.425907	0.697213		0.32738	0.116097	0.508983		0.32738	0.112072	0.0483911		0.32738
	0.43651	0.210452	0.589054		0.43651	0.258771	0.293254		0.43651	0.409884	0.309937		0.43651	0.0553892	0.1129		0.43651	0.29742	0.087213		0.43651	0.136544	0.0743321		0.43651	0.223351	0.166675		0.43651	0.472195	0.0773284		0.43651	0.202502	0.16557		0.43651	0.38537	0.956531		0.43651	0.101009	0.535004		0.43651	0.0965979	0.214086		0.43651
	0.54563	0.226804	0.595601		0.54563	0.399746	0.241811		0.54563	0.269027	0.161365		0.54563	0.182632	0.200034		0.54563	0.329654	0.0965855		0.54563	0.215554	0.130705		0.54563	0.235805	0.299498		0.54563	0.525483	0.0803278		0.54563	0.217662	0.174132		0.54563	0.363018	1		0.54563	0.101832	0.353828		0.54563	0.136334	0.435816		0.54563
	0.65476	0.131892	0.510647		0.65476	0.371925	0.15733		0.65476	0.413175	0.0828777		0.65476	0.17169	0.317461		0.65476	0.305277	0.162543		0.65476	0.229192	0.129713		0.65476	0.19587	0.386422		0.65476	0.533841	0.129048		0.65476	0.196021	0.194096		0.65476	0.434525	0.845939		0.65476	0.13713	0.289272		0.65476	0.141511	0.699768		0.65476
	0.76389	0.0831362	0.531328		0.76389	0.397174	0.0832419		0.76389	0.42925	0.0276195		0.76389	0.101337	0.411567		0.76389	0.464323	0.268705		0.76389	0.186799	0.200258		0.76389	0.118412	0.379523		0.76389	0.530475	0.0544145		0.76389	0.383295	0.469854		0.76389	0.462136	0.642701		0.76389	0.219903	0.231337		0.76389	0.125838	1		0.76389
	0.87302	0.0100227	0.520412		0.87302	0.229462	0.0726213		0.87302	0.354435	0.00809619		0.87302	0.183061	0.524072		0.87302	0.395417	0.230498		0.87302	0.162915	0.158405		0.87302	0.233348	0.266674		0.87302	0.761619	0.08265		0.87302	0.41131	0.385976		0.87302	0.459131	0.455863		0.87302	0.204748	0.519477		0.87302	0.197309	0.9973		0.87302
	0.98214	0.0144049	0.625592		0.98214	0.139378	0.0580379		0.98214	0.359943	0.0741557		0.98214	0.181667	0.424409		0.98214	0.44133	0.163336		0.98214	0.293825	0.185488		0.98214	0.256864	0.0607058		0.98214	0.897374	0.0964925		0.98214	0.491469	0.434614		0.98214	0.581299	0.544385		0.98214	0.240543	0.490988		0.98214	0.0718435	0.849737		0.98214
	1.09127	0	0.681761		1.09127	0.103526	0.0784604		1.09127	0.225853	0.0885286		1.09127	0.24637	0.313127		1.09127	0.468981	0.236993		1.09127	0.244363	0.139906		1.09127	0.290514	0.0178658		1.09127	0.912488	0.0925724		1.09127	0.419723	0.415688		1.09127	0.561354	0.576105		1.09127	0.310358	0.256233		1.09127	0	0.775827		1.09127
	1.2004	0.073739	0.469263		1.2004	0.0880736	0.0390084		1.2004	0.17719	0.0725192		1.2004	0.168614	0.252311		1.2004	0.55497	0.333887		1.2004	0.380416	0.170757		1.2004	0.256479	0.0858609		1.2004	0.766107	0		1.2004	0.37651	0.27772		1.2004	0.5732	0.54129		1.2004	0.305638	0.283197		1.2004	0.111118	0.616074		1.2004
	1.30952	0.0828461	0.467254		1.30952	0.0247753	0.0486795		1.30952	0.246823	0		1.30952	0.133068	0.170308		1.30952	0.368494	0.247908		1.30952	0.326654	0.158752		1.30952	0.275616	0.133858		1.30952	0.618992	0.0195157		1.30952	0.291742	0.420912		1.30952	0.554564	0.507989		1.30952	0.362918	0.143222		1.30952	0.321505	0.553837		1.30952
	1.41865	0.0960153	0.451491		1.41865	0.123699	0.0446314		1.41865	0.245975	0.0206015		1.41865	0.00756979	0.179315		1.41865	0.191029	0.319654		1.41865	0.345081	0.106676		1.41865	0.132647	0.0200236		1.41865	0.347019	0.0324773		1.41865	0.218485	0.645964		1.41865	0.487164	0.49497		1.41865	0.323354	0.206165		1.41865	0.4013	0.444208		1.41865
	1.52778	0.0649747	0.333597		1.52778	0.0713793	0.0303778		1.52778	0.234615	0.0608418		1.52778	0.106835	0.22241		1.52778	0.10331	0.327673		1.52778	0.413066	0.0642445		1.52778	0.0686285	0.0086585		1.52778	0.332763	0.155493		1.52778	0.223917	0.656688		1.52778	0.423861	0.303262		1.52778	0.275269	0.0987374		1.52778	0.531384	0.43354		1.52778
	1.6369	0.0344214	0.268502		1.6369	0.0286582	0		1.6369	0.130423	0.0605241		1.6369	0.127744	0.227204		1.6369	0	0.355647		1.6369	0.297857	0.105693		1.6369	0.0485491	0.0331083		1.6369	0.270838	0.260079		1.6369	0.185117	0.524771		1.6369	0.394627	0.17116		1.6369	0.180517	0		1.6369	0.865265	0.413789		1.6369
	1.74603	0.147412	0.180833		1.74603	0.0199858	0.024914		1.74603	0.210502	0.0729716		1.74603	0	0.272151		1.74603	0.0643725	0.357589		1.74603	0.146613	0.180565		1.74603	0.0492713	0		1.74603	0.117401	0.326788		1.74603	0.149249	0.373685		1.74603	0.326614	0.14993		1.74603	0.158378	0.173317		1.74603	0.905666	0.291577		1.74603
	1.85516	0.104477	0.0691848		1.85516	0.110415	0.035654		1.85516	0.078447	0.215372		1.85516	0.028081	0.214989		1.85516	0.10553	0.222147		1.85516	0.112297	0.171007		1.85516	0.0506393	0.145215		1.85516	0.0986346	0.412426		1.85516	0.179626	0.314899		1.85516	0.260945	0.0906159		1.85516	0.2143	0.313233		1.85516	0.87468	0.216934		1.85516
	1.96429	0.017283	0		1.96429	0.096263	0.040987		1.96429	0	0.220831		1.96429	0.0135281	0.141072		1.96429	0.101168	0.216623		1.96429	0	0.151063		1.96429	0.0814666	0.194133		1.96429	0	0.484783		1.96429	0.19356	0.181698		1.96429	0.233237	0.0610308		1.96429	0.215532	0.270425		1.96429	0.646014	0.129524		1.96429
	2.07341	0.0479054	0.0714304		2.07341	0.121433	0.096347		2.07341	0.0600981	0.197871		2.07341	0.133632	0.125012		2.07341	0.401464	0.0850495		2.07341	0.110204	0.124375		2.07341	0.0590219	0.162512		2.07341	0.301868	0.518988		2.07341	0.30493	0.254653		2.07341	0.177212	0.106831		2.07341	0.211183	0.250741		2.07341	0.613385	0.301867		2.07341
	2.18254	0.149893	0.075015		2.18254	0.057474	0.121653		2.18254	0.0913572	0.218077		2.18254	0.0379647	0.17248		2.18254	0.466687	0.115937		2.18254	0.11735	0.118286		2.18254	0	0.0791246		2.18254	0.477088	0.383246		2.18254	0.191589	0.389141		2.18254	0.213536	0.137886		2.18254	0.288383	0.287124		2.18254	0.612858	0.347981		2.18254
	2.29167	0.154914	0.0331401		2.29167	0.0678512	0.106143		2.29167	0.0788777	0.26754		2.29167	0.185235	0.351249		2.29167	0.564448	0.217628		2.29167	0.163018	0.258722		2.29167	0.0705162	0.11219		2.29167	0.627385	0.354872		2.29167	0.211621	0.449977		2.29167	0.219777	0.0321419		2.29167	0.204815	0.258398		2.29167	0.581874	0.36247		2.29167
	2.40079	0.175279	0.114474		2.40079	0.144532	0.137232		2.40079	0.074717	0.495225		2.40079	0.0908851	0.46617		2.40079	0.538767	0.317825		2.40079	0.152644	0.410729		2.40079	0.0570679	0.158226		2.40079	0.643207	0.393053		2.40079	0.258148	0.364283		2.40079	0.220813	0.122353		2.40079	0.0796639	0.22506		2.40079	0.408741	0.339754		2.40079
	2.50992	0.194444	0.215463		2.50992	0.0869304	0.160963		2.50992	0.272362	0.594141		2.50992	0.12404	0.50746		2.50992	0.675992	0.336929		2.50992	0.0516224	0.627742		2.50992	0.0418772	0.0854371		2.50992	0.672471	0.311692		2.50992	0.156083	0.515159		2.50992	0.110257	0.216761		2.50992	0.0565901	0.407013		2.50992	0.325157	0.409631		2.50992
	2.61905	0.184749	0.291121		2.61905	0.136008	0.206527		2.61905	0.326967	0.719752		2.61905	0.240707	0.590034		2.61905	0.763352	0.149134		2.61905	0.167195	0.810947		2.61905	0.126008	0.0507428		2.61905	0.435134	0.228603		2.61905	0	0.524725		2.61905	0.0132849	0.249595		2.61905	0	0.432889		2.61905	0.223108	0.620063		2.61905
	2.72817	0.104768	0.467982		2.72817	0.0784847	0.303045		2.72817	0.191509	0.637029		2.72817	0.237513	0.401214		2.72817	0.95244	0.222767		2.72817	0.175841	0.99658		2.72817	0.194085	0.065244		2.72817	0.120844	0.304365		2.72817	0.0709033	0.57199		2.72817	0	0.355151		2.72817	0.00585568	0.277942		2.72817	0.127713	0.55559		2.72817
	2.8373	0.049935	0.551304		2.8373	0.0336743	0.322057		2.8373	0.331546	0.644056		2.8373	0.00552446	0.405008		2.8373	0.848936	0.250454		2.8373	0.171398	1		2.8373	0.172438	0.110487		2.8373	0.0225754	0.180809		2.8373	0.142277	0.732851		2.8373	0.0188218	0.374518		2.8373	0.0961994	0.322878		2.8373	0.000222107	0.571068		2.8373
	2.94643	0.197653	0.678949		2.94643	0.0625197	0.447724		2.94643	0.380899	0.508356		2.94643	0.696791	0.471474		2.94643	0.747989	0.480529		2.94643	0.274767	0.932605		2.94643	0.14826	0.0795786		2.94643	0.0943131	0.107884		2.94643	0.173743	0.993226		2.94643	0.112787	0.424419		2.94643	0.106486	0.386567		2.94643	0.0700456	0.730664		2.94643
	3.05556	0.225259	0.852476		3.05556	0.0806232	0.591773		3.05556	0.295754	0.449363		3.05556	0.663597	0.480509		3.05556	0.820058	0.649667		3.05556	0.412562	0.919386		3.05556	0.120959	0.118122		3.05556	0.135955	0.143981		3.05556	0.326689	1		3.05556	0.170882	0.512718		3.05556	0.0846513	0.499896		3.05556	0.129917	0.707814		3.05556
	3.16468	0.208765	1		3.16468	0	0.865674		3.16468	0.343663	0.345325		3.16468	0.709732	0.34619		3.16468	0.758522	0.658111		3.16468	0.52928	0.837953		3.16468	0.25612	0.176022		3.16468	0.313688	0.21588		3.16468	0.547792	0.949064		3.16468	0.203896	0.714606		3.16468	0.125537	0.619603		3.16468	0.117012	0.688578		3.16468
	3.27381	0.286483	0.832163		3.27381	0.136767	1		3.27381	0.459402	0.300714		3.27381	0.796436	0.298301		3.27381	0.655028	0.685767		3.27381	0.657339	0.576167		3.27381	0.387447	0.260219		3.27381	0.415935	0.202638		3.27381	0.726673	0.799961		3.27381	0.270426	0.810743		3.27381	0.155899	0.611772		3.27381	0.191546	0.656678		3.27381
	3.38294	0.305083	0.792408		3.38294	0.173536	0.95704		3.38294	0.614433	0.285793		3.38294	0.83013	0.458131		3.38294	0.725926	0.670462		3.38294	0.750617	0.334461		3.38294	0.387614	0.30418		3.38294	0.367222	0.309044		3.38294	0.886345	0.53975		3.38294	0.277152	0.671215		3.38294	0.15506	0.51774		3.38294	0.257001	0.516521		3.38294
	3.49206	0.385131	0.651641		3.49206	0.130499	0.837127		3.49206	0.648777	0.280421		3.49206	0.91408	0.529059		3.49206	0.659146	0.80124		3.49206	0.639069	0.29729		3.49206	0.259049	0.161927		3.49206	0.361427	0.347178		3.49206	1	0.454529		3.49206	0.191507	0.474115		3.49206	0.185074	0.526417		3.49206	0.252629	0.488793		3.49206
	3.60119	0.427118	0.603537		3.60119	0.149233	0.684697		3.60119	0.613653	0.268041		3.60119	0.788661	0.582241		3.60119	0.553502	0.828299		3.60119	0.437133	0.308765		3.60119	0.297183	0.2663		3.60119	0.296806	0.303121		3.60119	0.951345	0.382949		3.60119	0.315575	0.34246		3.60119	0.257116	0.483057		3.60119	0.370182	0.277704		3.60119
	3.71032	0.475284	0.567059		3.71032	0.194487	0.551491		3.71032	0.693177	0.246274		3.71032	0.633708	0.758821		3.71032	0.466735	0.769017		3.71032	0.258542	0.260899		3.71032	0.438501	0.288533		3.71032	0.231777	0.177336		3.71032	0.750343	0.222121		3.71032	0.241802	0.351143		3.71032	0.25316	0.44425		3.71032	0.342586	0.332933		3.71032
	3.81944	0.735036	0.634472		3.81944	0.215173	0.408187		3.81944	0.734023	0.201692		3.81944	0.493258	0.822287		3.81944	0.40458	0.859004		3.81944	0.310665	0.335212		3.81944	0.208867	0.206079		3.81944	0.198581	0.249363		3.81944	0.395954	0.216681		3.81944	0.130946	0.32244		3.81944	0.176294	0.465911		3.81944	0.317704	0.496092		3.81944
	3.92857	0.795842	0.677008		3.92857	0.0898474	0.425551		3.92857	0.58069	0.287526		3.92857	0.630913	1		3.92857	0.598893	1		3.92857	0.451114	0.357102		3.92857	0.28052	0.243902		3.92857	0.212468	0.298078		3.92857	0.311235	0.24987		3.92857	0.139787	0.209625		3.92857	0.154192	0.553736		3.92857	0.37949	0.632105		3.92857
	4.0377	0.733138	0.582862		4.0377	0.131908	0.410399		4.0377	0.865996	0.282702		4.0377	0.449031	0.920334		4.0377	0.756047	0.74726		4.0377	0.434946	0.429951		4.0377	0.478196	0.222266		4.0377	0.28577	0.256999		4.0377	0.256893	0.216373		4.0377	0.174743	0.139869		4.0377	0.170965	0.568248		4.0377	0.260335	0.537565		4.0377
	4.14683	0.874717	0.464876		4.14683	0.188417	0.42857		4.14683	0.962373	0.283588		4.14683	0.624754	0.590091		4.14683	0.573167	0.646649		4.14683	0.429132	0.619871		4.14683	0.434607	0.177744		4.14683	0.286839	0.317514		4.14683	0.214818	0.359444		4.14683	0.359705	0.0374458		4.14683	0.173206	0.630454		4.14683	0.224341	0.569246		4.14683
	4.25595	0.896379	0.485234		4.25595	0.213734	0.408579		4.25595	0.988465	0.458152		4.25595	0.781877	0.316631		4.25595	0.636048	0.649614		4.25595	0.528695	0.719137		4.25595	0.319814	0.153682		4.25595	0.279961	0.399776		4.25595	0.223584	0.259691		4.25595	0.497579	0		4.25595	0.150786	0.658884		4.25595	0.22196	0.56049		4.25595
	4.36508	0.962837	0.423016		4.36508	0.286522	0.427728		4.36508	0.994577	0.533136		4.36508	0.731039	0.345303		4.36508	0.762688	0.629769		4.36508	0.571228	0.722413		4.36508	0.383199	0.149566		4.36508	0.342527	0.297503		4.36508	0.295007	0.350769		4.36508	0.62893	0.0909049		4.36508	0.114909	0.695219		4.36508	0.130123	0.429007		4.36508
	4.47421	0.980908	0.450451		4.47421	0.334575	0.418472		4.47421	1	0.58928		4.47421	0.671286	0.529988		4.47421	0.55249	0.508165		4.47421	0.573845	0.685156		4.47421	0.485189	0.282248		4.47421	0.333006	0.26161		4.47421	0.344064	0.206934		4.47421	0.955435	0.0107967		4.47421	0.111711	0.741668		4.47421	0.300235	0.433177		4.47421
	4.58333	0.793652	0.426946		4.58333	0.427271	0.425602		4.58333	0.993803	0.671724		4.58333	1	0.571812		4.58333	0.409923	0.413113		4.58333	0.492318	0.70958		4.58333	0.511953	0.317786		4.58333	0.240156	0.384051		4.58333	0.33267	0.305499		4.58333	1	0.0406397		4.58333	0.202195	0.57115		4.58333	0.247362	0.468645		4.58333
	4.69246	0.705255	0.386695		4.69246	0.532856	0.437928		4.69246	0.960279	0.735069		4.69246	0.91803	0.513272		4.69246	0.464859	0.384981		4.69246	0.546067	0.68055		4.69246	0.377525	0.327158		4.69246	0.307504	0.520544		4.69246	0.355634	0.300721		4.69246	0.734596	0.224094		4.69246	0.344312	0.448525		4.69246	0.272107	0.483222		4.69246
	4.80159	0.781346	0.486444		4.80159	0.536168	0.445712		4.80159	0.918393	0.762342		4.80159	0.968731	0.519608		4.80159	0.420121	0.344854		4.80159	0.679172	0.62489		4.80159	0.35789	0.448736		4.80159	0.442839	0.649363		4.80159	0.377432	0.28614		4.80159	0.533184	0.265057		4.80159	0.507871	0.331667		4.80159	0.260027	0.502756		4.80159
	4.91071	0.816524	0.471849		4.91071	0.576386	0.425136		4.91071	0.785427	0.795044		4.91071	0.963062	0.559635		4.91071	0.41263	0.258685		4.91071	0.650416	0.520874		4.91071	0.54182	0.470491		4.91071	0.355696	0.778776		4.91071	0.387992	0.272145		4.91071	0.460814	0.285672		4.91071	0.751783	0.313718		4.91071	0.380823	0.56234		4.91071
	5.01984	1	0.509246		5.01984	0.66646	0.507974		5.01984	0.91384	0.822606		5.01984	0.659508	0.501297		5.01984	0.597622	0.135195		5.01984	0.608007	0.366939		5.01984	0.490148	0.522783		5.01984	0.616812	0.84986		5.01984	0.416693	0.286386		5.01984	0.376987	0.268879		5.01984	0.924507	0.421673		5.01984	0.631552	0.54036		5.01984
	5.12897	0.934774	0.565169		5.12897	0.86824	0.500452		5.12897	0.801813	0.970513		5.12897	0.6151	0.526727		5.12897	0.734271	0.184632		5.12897	0.65329	0.365774		5.12897	0.749494	0.803178		5.12897	0.741766	0.932305		5.12897	0.454807	0.234524		5.12897	0.406928	0.114756		5.12897	1	0.535834		5.12897	0.793536	0.538846		5.12897
	5.2381	0.707331	0.650809		5.2381	1	0.456599		5.2381	0.743588	1		5.2381	0.408143	0.61494		5.2381	1	0.189445		5.2381	0.970603	0.29438		5.2381	1	0.852431		5.2381	0.846294	0.992406		5.2381	0.502687	0.259789		5.2381	0.48889	0.151101		5.2381	0.81958	0.329203		5.2381	1	0.405301		5.2381
	5.34722	0.466315	0.607201		5.34722	0.900554	0.362606		5.34722	0.507958	0.921464		5.34722	0.346192	0.67		5.34722	0.982657	0.201434		5.34722	0.888234	0.342207		5.34722	0.850779	1		5.34722	1	1		5.34722	0.493332	0.295506		5.34722	0.549544	0.185727		5.34722	0.583007	0.568041		5.34722	0.857946	0.225535		5.34722
	5.45635	0.363959	0.618053		5.45635	0.736065	0.389641		5.45635	0.417278	0.629674		5.45635	0.36053	0.453351		5.45635	0.804901	0.193223		5.45635	1	0.316675		5.45635	0.777055	0.885974		5.45635	0.77872	0.8867		5.45635	0.643728	0.296815		5.45635	0.706334	0.199036		5.45635	0.410098	0.453521		5.45635	0.706041	0.295618		5.45635
	5.56548	0.248455	0.5119		5.56548	0.490253	0.37989		5.56548	0.431873	0.581328		5.56548	0.574732	0.344989		5.56548	0.745668	0.151119		5.56548	0.873482	0.243692		5.56548	0.790841	0.756038		5.56548	0.607132	0.653926		5.56548	0.699198	0.301302		5.56548	0.775584	0.237555		5.56548	0.296391	0.450199		5.56548	0.323299	0.220934		5.56548
	5.6746	0.173988	0.554717		5.6746	0.273001	0.448697		5.6746	0.434162	0.515239		5.6746	0.634516	0.330401		5.6746	0.769612	0.0989853		5.6746	0.634411	0.196414		5.6746	0.604234	0.533029		5.6746	0.379898	0.549719		5.6746	0.723153	0.339961		5.6746	0.532587	0.134899		5.6746	0.254206	0.462477		5.6746	0.203207	0.189236		5.6746
	5.78373	0.209614	0.555738		5.78373	0.305276	0.438485		5.78373	0.413361	0.476308		5.78373	0.340236	0.117173		5.78373	0.5819	0.107962		5.78373	0.406407	0.169706		5.78373	0.451538	0.351716		5.78373	0.20386	0.386605		5.78373	0.597584	0.412033		5.78373	0.487109	0.181198		5.78373	0.278987	0.6766		5.78373	0.054691	0.210672		5.78373
	5.89286	0.19331	0.548017		5.89286	0.286651	0.500372		5.89286	0.421812	0.383255		5.89286	0.550048	0.0973821		5.89286	0.343609	0.198939		5.89286	0.326376	0.136852		5.89286	0.440893	0.139915		5.89286	0.166211	0.41523		5.89286	0.42085	0.279516		5.89286	0.39196	0.25994		5.89286	0.218182	0.540368		5.89286	0.0675521	0.235091		5.89286
	6.00198	0.239007	0.631356		6.00198	0.239524	0.496068		6.00198	0.388229	0.25852																						6.00198	0.255462	0.198075		6.00198	0.294215	0.278179		6.00198	0.218835	0.521702		6.00198	0.0952664	0.273149		6.00198
	6.11111	0.244192	0.601226		6.11111	0.311396	0.403872		6.11111	0.476453	0.232566																						6.11111	0.107576	0.225222		6.11111	0.26888	0.35195		6.11111	0.229151	0.741659		6.11111	0.0556565	0.250045		6.11111
																																																	6.22024
																																																	6.32937
line profiles normalised for overall min-max
max		336.806	324.796			359.626	386.025			329.107	325.831			340.939	293.506			358.68	319.149			342.967	336.334			366.56	305.167			358.556	313.797			384.822	290.026			367.558	301.279			404.867	295.4			361.081	304.85
min		239.936	225.092			258.154	210.14			243.664	221.955			292.536	230.642			292.267	237.058			273.466	232.543			288.052	235.559			286.96	233.313			282.838	229.895			271.042	230.331			270.126	240.979			275.536	241.936
max		404.867	386.025
min		238.113	210.14
max		404.867	386.025			404.867	386.025			404.867	386.025			404.867	386.025			404.867	386.025			404.867	386.025			404.867	386.025			404.867	386.025			404.867	386.025			404.867	386.025			404.867	386.025			404.867	386.025
min		238.113	210.14			238.113	210.14			238.113	210.14			238.113	210.14			238.113	210.14			238.113	210.14			238.113	210.14			238.113	210.14			238.113	210.14			238.113	210.14			238.113	210.14			238.113	210.14
	t85				t86				t87				t88				t89				t90				t91				t92				t93				t94				t95				t96				t97
		Rab5	Rab11			Rab5	Rab11			Rab5	Rab11			Rab5	Rab11			Rab5	Rab11			Rab5	Rab11			Rab5	Rab11			Rab5	Rab11			Rab5	Rab11			Rab5	Rab11			Rab5	Rab11			Rab5	Rab11
	0	0.206038	0.334708		0	0.260325	0.42795		0	0.268551	0.198743		0	0.486673	0.165008		0	0.534026	0.182327		0	0.353596	0.175484		0	0.502947	0.149278		0	0.415558	0.244921		0	0.34509	0.112319		0	0.353302	0.229316		0	0.358523	0.484747		0	0.312196	0.194658		0
	0.10913	0.168376	0.293351		0.10913	0.237489	0.429201		0.10913	0.261453	0.212264		0.10913	0.476508	0.116566		0.10913	0.474506	0.153042		0.10913	0.342837	0.127373		0.10913	0.473877	0.178216		0.10913	0.437698	0.286638		0.10913	0.344137	0.133656		0.10913	0.360976	0.253106		0.10913	0.307904	0.435807		0.10913	0.264782	0.182968		0.10913
	0.21825	0.217753	0.249444		0.21825	0.320965	0.397652		0.21825	0.292354	0.249191		0.21825	0.482282	0.122639		0.21825	0.473208	0.180969		0.21825	0.394475	0.131091		0.21825	0.398173	0.166984		0.21825	0.458436	0.221167		0.21825	0.297691	0.135994		0.21825	0.3938	0.314284		0.21825	0.317319	0.420432		0.21825	0.277913	0.180776		0.21825
	0.32738	0.156439	0.338057		0.32738	0.266891	0.322222		0.32738	0.299177	0.229389		0.32738	0.46613	0.147135		0.32738	0.527489	0.202522		0.32738	0.315215	0.165091		0.32738	0.376879	0.174878		0.32738	0.463224	0.134494		0.32738	0.317715	0.148248		0.32738	0.443983	0.396036		0.32738	0.285788	0.33282		0.32738	0.281916	0.198086		0.32738
	0.43651	0.133191	0.418929		0.43651	0.27765	0.293254		0.43651	0.243309	0.25022		0.43651	0.342447	0.156918		0.43651	0.443206	0.193747		0.43651	0.268917	0.171237		0.43651	0.404632	0.210484		0.43651	0.495666	0.167135		0.43651	0.392058	0.168923		0.43651	0.420521	0.500639		0.43651	0.273596	0.340871		0.43651	0.273978	0.257355		0.43651
	0.54563	0.14269	0.422641		0.54563	0.363435	0.241811		0.54563	0.171136	0.162475		0.54563	0.379381	0.188061		0.54563	0.456044	0.198121		0.54563	0.301848	0.204503		0.54563	0.410495	0.263049		0.54563	0.518546	0.168508		0.54563	0.401329	0.17185		0.54563	0.407584	0.518173		0.54563	0.274262	0.284813		0.54563	0.294362	0.336668		0.54563
	0.65476	0.0875546	0.374483		0.65476	0.346506	0.15733		0.65476	0.244996	0.116121		0.65476	0.376205	0.230031		0.65476	0.446335	0.228906		0.65476	0.307531	0.203917		0.65476	0.391694	0.29745		0.65476	0.522134	0.190802		0.65476	0.388094	0.178675		0.65476	0.448971	0.456029		0.65476	0.302783	0.264838		0.65476	0.297018	0.431085		0.65476
	0.76389	0.0592315	0.386206		0.76389	0.36187	0.0832419		0.76389	0.253232	0.0834864		0.76389	0.355784	0.263665		0.76389	0.509679	0.278455		0.76389	0.289863	0.245547		0.76389	0.355226	0.29472		0.76389	0.520689	0.15665		0.76389	0.502628	0.272949		0.76389	0.464952	0.374047		0.76389	0.369665	0.246912		0.76389	0.288978	0.538478		0.76389
	0.87302	0.0167588	0.380019		0.87302	0.259815	0.0726213		0.87302	0.214898	0.0719561		0.87302	0.379506	0.303876		0.87302	0.482235	0.260623		0.87302	0.279908	0.220849		0.87302	0.409338	0.250059		0.87302	0.61993	0.16957		0.87302	0.519761	0.244274		0.87302	0.463213	0.298682		0.87302	0.35742	0.336067		0.87302	0.325643	0.537512		0.87302
	0.98214	0.0193044	0.439642		0.98214	0.204998	0.0580379		0.98214	0.21772	0.11097		0.98214	0.379101	0.268255		0.98214	0.500521	0.229276		0.98214	0.33447	0.236831		0.98214	0.42041	0.168545		0.98214	0.678216	0.175905		0.98214	0.568785	0.260902		0.98214	0.533923	0.334389		0.98214	0.386343	0.327252		0.98214	0.261279	0.484729		0.98214
	1.09127	0.0109364	0.471483		1.09127	0.183181	0.0784604		1.09127	0.149013	0.119459		1.09127	0.397882	0.228482		1.09127	0.511534	0.263654		1.09127	0.313855	0.209933		1.09127	0.436252	0.151591		1.09127	0.684705	0.174111		1.09127	0.524906	0.254432		1.09127	0.522379	0.347184		1.09127	0.442755	0.254616		1.09127	0.224424	0.458291		1.09127
	1.2004	0.0537725	0.351024		1.2004	0.173778	0.0390084		1.2004	0.124079	0.110004		1.2004	0.375312	0.206745		1.2004	0.545781	0.308877		1.2004	0.37056	0.228138		1.2004	0.420228	0.178501		1.2004	0.621857	0.13175		1.2004	0.498478	0.207264		1.2004	0.529235	0.33314		1.2004	0.438941	0.262959		1.2004	0.281427	0.401147		1.2004
	1.30952	0.0590629	0.349885		1.30952	0.135261	0.0486795		1.30952	0.159758	0.0671746		1.30952	0.364994	0.177436		1.30952	0.471513	0.268748		1.30952	0.348152	0.221054		1.30952	0.429238	0.197496		1.30952	0.558693	0.140681		1.30952	0.446635	0.256217		1.30952	0.518448	0.319708		1.30952	0.485225	0.219649		1.30952	0.389354	0.378884		1.30952
	1.41865	0.0667131	0.340949		1.41865	0.195457	0.0446314		1.41865	0.159324	0.0793416		1.41865	0.328567	0.180656		1.41865	0.400833	0.302234		1.41865	0.355833	0.190323		1.41865	0.361928	0.152445		1.41865	0.441922	0.146612		1.41865	0.401833	0.333157		1.41865	0.479438	0.314456		1.41865	0.453255	0.239124		1.41865	0.430289	0.33967		1.41865
	1.52778	0.0486812	0.274119		1.52778	0.16362	0.0303778		1.52778	0.153503	0.103107		1.52778	0.35738	0.196058		1.52778	0.365898	0.305977		1.52778	0.384168	0.165284		1.52778	0.331788	0.147947		1.52778	0.435802	0.202903		1.52778	0.405155	0.336823		1.52778	0.442799	0.237126		1.52778	0.414402	0.205885		1.52778	0.497022	0.335854		1.52778
	1.6369	0.0309323	0.237218		1.6369	0.137623	0		1.6369	0.100116	0.10292		1.6369	0.363449	0.197772		1.6369	0.324752	0.319033		1.6369	0.33615	0.189743		1.6369	0.322335	0.157623		1.6369	0.409214	0.250761		1.6369	0.381425	0.291724		1.6369	0.425879	0.183839		1.6369	0.33784	0.175334		1.6369	0.668301	0.328789		1.6369
	1.74603	0.0965702	0.187521		1.74603	0.132346	0.024914		1.74603	0.141148	0.110271		1.74603	0.326369	0.213836		1.74603	0.35039	0.31994		1.74603	0.273114	0.233926		1.74603	0.322675	0.144521		1.74603	0.343336	0.281287		1.74603	0.359489	0.240072		1.74603	0.386514	0.175275		1.74603	0.319952	0.22896		1.74603	0.689027	0.285074		1.74603
	1.85516	0.0716287	0.124231		1.85516	0.187373	0.035654		1.85516	0.0734836	0.194371		1.85516	0.33452	0.193406		1.85516	0.366782	0.256725		1.85516	0.258811	0.228286		1.85516	0.323319	0.201991		1.85516	0.335279	0.320474		1.85516	0.378067	0.219974		1.85516	0.348505	0.151349		1.85516	0.365138	0.272252		1.85516	0.673131	0.258374		1.85516
	1.96429	0.0209764	0.0850124		1.96429	0.178762	0.040987		1.96429	0.0332879	0.197595		1.96429	0.330296	0.166987		1.96429	0.365044	0.254147		1.96429	0.212008	0.216516		1.96429	0.337832	0.22135		1.96429	0.29293	0.353584		1.96429	0.386589	0.174437		1.96429	0.332468	0.139416		1.96429	0.366133	0.259007		1.96429	0.555826	0.227107		1.96429
	2.07341	0.0387654	0.125504		2.07341	0.194078	0.096347		2.07341	0.0640817	0.184035		2.07341	0.365158	0.161247		2.07341	0.484644	0.192737		2.07341	0.257939	0.200768		2.07341	0.327265	0.208836		2.07341	0.422537	0.369236		2.07341	0.454701	0.199378		2.07341	0.300041	0.15789		2.07341	0.362619	0.252916		2.07341	0.539088	0.288755		2.07341
	2.18254	0.0980113	0.127536		2.18254	0.155158	0.121653		2.18254	0.0800987	0.195969		2.18254	0.337389	0.178212		2.18254	0.51062	0.207154		2.18254	0.260917	0.197174		2.18254	0.299478	0.175835		2.18254	0.497767	0.307122		2.18254	0.385383	0.245356		2.18254	0.321065	0.170417		2.18254	0.424998	0.264174		2.18254	0.538817	0.305249		2.18254
	2.29167	0.100928	0.103799		2.29167	0.161473	0.106143		2.29167	0.0737042	0.225181		2.29167	0.380137	0.242107		2.29167	0.549556	0.254616		2.29167	0.279951	0.280047		2.29167	0.332677	0.188921		2.29167	0.562297	0.294138		2.29167	0.397635	0.266154		2.29167	0.324678	0.127762		2.29167	0.357474	0.255286		2.29167	0.522923	0.310432		2.29167
	2.40079	0.112759	0.149904		2.40079	0.208134	0.137232		2.40079	0.0715724	0.35965		2.40079	0.35275	0.283182		2.40079	0.539328	0.301381		2.40079	0.275628	0.369747		2.40079	0.326345	0.20714		2.40079	0.56909	0.311609		2.40079	0.42609	0.236858		2.40079	0.325277	0.164152		2.40079	0.256349	0.24497		2.40079	0.434106	0.302307		2.40079
	2.50992	0.123892	0.207152		2.50992	0.173083	0.160963		2.50992	0.172844	0.418069		2.50992	0.362374	0.297939		2.50992	0.59398	0.310297		2.50992	0.233523	0.497808		2.50992	0.319194	0.178333		2.50992	0.581655	0.274379		2.50992	0.363669	0.288438		2.50992	0.261289	0.202233		2.50992	0.237705	0.301269		2.50992	0.391228	0.327302		2.50992
	2.61905	0.11826	0.25004		2.61905	0.202947	0.206527		2.61905	0.200824	0.492253		2.61905	0.396238	0.327452		2.61905	0.628774	0.222648		2.61905	0.281692	0.605919		2.61905	0.358803	0.164602		2.61905	0.479754	0.236358		2.61905	0.268211	0.291708		2.61905	0.205162	0.215478		2.61905	0.191979	0.309275		2.61905	0.338877	0.402574		2.61905
	2.72817	0.0717978	0.350298		2.72817	0.167943	0.303045		2.72817	0.131416	0.443398		2.72817	0.395311	0.259965		2.72817	0.704082	0.257015		2.72817	0.285296	0.715462		2.72817	0.390853	0.170341		2.72817	0.344814	0.271026		2.72817	0.311574	0.307867		2.72817	0.197473	0.258057		2.72817	0.19671	0.261333		2.72817	0.28994	0.379512		2.72817
	2.8373	0.0399444	0.39753		2.8373	0.140676	0.322057		2.8373	0.20317	0.447548		2.8373	0.327973	0.261321		2.8373	0.662859	0.269937		2.8373	0.283444	0.71748		2.8373	0.380662	0.188247		2.8373	0.302623	0.214487		2.8373	0.355225	0.362861		2.8373	0.208367	0.265869		2.8373	0.26971	0.275237		2.8373	0.224538	0.385048		2.8373
	2.94643	0.125756	0.469888		2.94643	0.158229	0.447724		2.94643	0.228458	0.367405		2.94643	0.528623	0.285077		2.94643	0.622655	0.37732		2.94643	0.326527	0.67771		2.94643	0.369279	0.176014		2.94643	0.333423	0.181117		2.94643	0.374469	0.451877		2.94643	0.262753	0.285998		2.94643	0.278022	0.294943		2.94643	0.260357	0.442136		2.94643
	3.05556	0.141792	0.568256		3.05556	0.169245	0.591773		3.05556	0.18483	0.332564		3.05556	0.518988	0.288307		3.05556	0.651358	0.456262		3.05556	0.383958	0.669909		3.05556	0.356426	0.191268		3.05556	0.351302	0.197635		3.05556	0.468008	0.454192		3.05556	0.296378	0.321615		3.05556	0.260379	0.330008		3.05556	0.291071	0.433963		3.05556
	3.16468	0.132211	0.651883		3.16468	0.120185	0.865674		3.16468	0.209378	0.27112		3.16468	0.53238	0.240299		3.16468	0.62685	0.460203		3.16468	0.432604	0.621855		3.16468	0.420059	0.214183		3.16468	0.427612	0.230536		3.16468	0.603231	0.436779		3.16468	0.315486	0.403052		3.16468	0.293416	0.367047		3.16468	0.28445	0.427082		3.16468
	3.27381	0.177359	0.556741		3.27381	0.203409	1		3.27381	0.268682	0.244774		3.27381	0.557547	0.223183		3.27381	0.585631	0.473111		3.27381	0.485977	0.467374		3.27381	0.481889	0.247504		3.27381	0.471511	0.224476		3.27381	0.712631	0.385804		3.27381	0.353993	0.441831		3.27381	0.317949	0.364624		3.27381	0.322686	0.415671		3.27381
	3.38294	0.188164	0.534205		3.38294	0.225783	0.95704		3.38294	0.348119	0.235961		3.38294	0.567327	0.280308		3.38294	0.613868	0.465968		3.38294	0.524854	0.324741		3.38294	0.481967	0.264902		3.38294	0.450596	0.273167		3.38294	0.810284	0.296845		3.38294	0.357886	0.385549		3.38294	0.317271	0.335529		3.38294	0.356264	0.365537		3.38294
	3.49206	0.234664	0.454408		3.49206	0.199595	0.837127		3.49206	0.365717	0.232788		3.49206	0.591694	0.305659		3.49206	0.587271	0.527006		3.49206	0.478362	0.302806		3.49206	0.421439	0.208604		3.49206	0.448108	0.290617		3.49206	0.879793	0.26771		3.49206	0.308315	0.306044		3.49206	0.341522	0.338214		3.49206	0.354021	0.355618		3.49206
	3.60119	0.259055	0.42714		3.60119	0.210995	0.684697		3.60119	0.347719	0.225477		3.60119	0.55529	0.324667		3.60119	0.545196	0.539635		3.60119	0.394199	0.309577		3.60119	0.439392	0.249911		3.60119	0.420363	0.270457		3.60119	0.850037	0.243239		3.60119	0.380125	0.252937		3.60119	0.399734	0.324798		3.60119	0.414326	0.280111		3.60119
	3.71032	0.287036	0.406462		3.71032	0.238532	0.551491		3.71032	0.388467	0.212622		3.71032	0.510312	0.387779		3.71032	0.510639	0.511966		3.71032	0.319764	0.281332		3.71032	0.505925	0.25871		3.71032	0.392443	0.212898		3.71032	0.727107	0.188256		3.71032	0.337425	0.25644		3.71032	0.396537	0.312791		3.71032	0.400169	0.299867		3.71032
	3.81944	0.437929	0.444676		3.81944	0.25112	0.408187		3.81944	0.409396	0.186292		3.81944	0.469545	0.410463		3.81944	0.485885	0.553966		3.81944	0.341489	0.325184		3.81944	0.397813	0.226078		3.81944	0.378191	0.245857		3.81944	0.510369	0.186396		3.81944	0.273263	0.244862		3.81944	0.334428	0.319493		3.81944	0.387405	0.358229		3.81944
	3.92857	0.473253	0.468788		3.92857	0.174858	0.425551		3.92857	0.330829	0.236984		3.92857	0.509501	0.47398		3.92857	0.563274	0.619773		3.92857	0.400026	0.338102		3.92857	0.431547	0.241047		3.92857	0.384153	0.268149		3.92857	0.458557	0.197743		3.92857	0.27838	0.199355		3.92857	0.316569	0.346667		3.92857	0.4191	0.406881		3.92857
	4.0377	0.436827	0.41542		4.0377	0.200452	0.410399		4.0377	0.477018	0.234136		4.0377	0.456707	0.445506		4.0377	0.625864	0.501811		4.0377	0.393287	0.38109		4.0377	0.524613	0.232484		4.0377	0.415625	0.249352		4.0377	0.425322	0.186291		4.0377	0.298612	0.171217		4.0377	0.330122	0.351157		4.0377	0.357975	0.373064		4.0377
	4.14683	0.519072	0.348537		4.14683	0.234838	0.42857		4.14683	0.526401	0.234659		4.14683	0.507713	0.327472		4.14683	0.553028	0.454853		4.14683	0.390864	0.493163		4.14683	0.504091	0.214864		4.14683	0.416084	0.277043		4.14683	0.39959	0.235203		4.14683	0.405666	0.129902		4.14683	0.331933	0.370405		4.14683	0.33951	0.384397		4.14683
	4.25595	0.531656	0.360077		4.25595	0.250244	0.408579		4.25595	0.53977	0.337755		4.25595	0.553321	0.229734		4.25595	0.578072	0.456237		4.25595	0.43236	0.551741		4.25595	0.450047	0.205342		4.25595	0.413131	0.314686		4.25595	0.404951	0.2011		4.25595	0.485466	0.114797		4.25595	0.313817	0.379201		4.25595	0.338288	0.381264		4.25595
	4.36508	0.570262	0.324808		4.36508	0.294537	0.427728		4.36508	0.542902	0.382039		4.36508	0.538564	0.239982		4.36508	0.628509	0.446975		4.36508	0.450087	0.553674		4.36508	0.479889	0.203713		4.36508	0.439993	0.267886		4.36508	0.448632	0.232238		4.36508	0.561491	0.151466		4.36508	0.284828	0.390444		4.36508	0.291176	0.334233		4.36508
	4.47421	0.58076	0.34036		4.47421	0.323778	0.418472		4.47421	0.545681	0.415197		4.47421	0.52122	0.305991		4.47421	0.544793	0.390219		4.47421	0.451178	0.531688		4.47421	0.527905	0.256223		4.47421	0.435906	0.251461		4.47421	0.478634	0.183064		4.47421	0.750468	0.119152		4.47421	0.282243	0.404816		4.47421	0.378443	0.335724		4.47421
	4.58333	0.471981	0.327035		4.58333	0.380184	0.425602		4.58333	0.542505	0.463888		4.58333	0.616634	0.320939		4.58333	0.488013	0.345855		4.58333	0.417199	0.546101		4.58333	0.540506	0.270287		4.58333	0.396041	0.30749		4.58333	0.471666	0.216761		4.58333	0.776262	0.13119		4.58333	0.355357	0.352055		4.58333	0.351319	0.348411		4.58333
	4.69246	0.42063	0.304218		4.69246	0.444434	0.437928		4.69246	0.525328	0.501299		4.69246	0.592841	0.300016		4.69246	0.509892	0.332725		4.69246	0.439601	0.528971		4.69246	0.477217	0.273996		4.69246	0.424956	0.369949		4.69246	0.48571	0.215127		4.69246	0.622649	0.205191		4.69246	0.470191	0.314113		4.69246	0.364013	0.353625		4.69246
	4.80159	0.464832	0.360763		4.80159	0.446449	0.445712		4.80159	0.503866	0.517406		4.80159	0.607558	0.302281		4.80159	0.492074	0.313996		4.80159	0.495077	0.496125		4.80159	0.467973	0.322112		4.80159	0.483062	0.428895		4.80159	0.499041	0.210142		4.80159	0.506074	0.221715		4.80159	0.602349	0.277956		4.80159	0.357816	0.360613		4.80159
	4.91071	0.485267	0.352489		4.91071	0.470922	0.425136		4.91071	0.435735	0.53672		4.91071	0.605912	0.316587		4.91071	0.489091	0.273778		4.91071	0.483092	0.434744		4.91071	0.554567	0.330721		4.91071	0.445648	0.488114		4.91071	0.5055	0.205358		4.91071	0.464187	0.23003		4.91071	0.799435	0.272402		4.91071	0.419784	0.381926		4.91071
	5.01984	0.591851	0.373689		5.01984	0.525733	0.507974		5.01984	0.501533	0.552998		5.01984	0.517801	0.295736		5.01984	0.562768	0.216142		5.01984	0.465416	0.343907		5.01984	0.53024	0.351416		5.01984	0.557757	0.520641		5.01984	0.523053	0.210227		5.01984	0.415669	0.223257		5.01984	0.939	0.305805		5.01984	0.548407	0.374064		5.01984
	5.12897	0.553961	0.40539		5.12897	0.648519	0.500452		5.12897	0.444131	0.64035		5.12897	0.504911	0.304825		5.12897	0.617191	0.239215		5.12897	0.48429	0.343219		5.12897	0.652341	0.462385		5.12897	0.611406	0.558368		5.12897	0.546363	0.192496		5.12897	0.432999	0.161087		5.12897	1	0.341128		5.12897	0.631505	0.373522		5.12897
	5.2381	0.421836	0.453937		5.2381	0.728697	0.456599		5.2381	0.414297	0.657765		5.2381	0.444839	0.336354		5.2381	0.723024	0.241462		5.2381	0.616541	0.301089		5.2381	0.770279	0.481877		5.2381	0.656285	0.58587		5.2381	0.575645	0.201134		5.2381	0.480437	0.175748		5.2381	0.854217	0.277194		5.2381	0.73742	0.325753		5.2381
	5.34722	0.281825	0.429217		5.34722	0.668182	0.362606		5.34722	0.293562	0.611382		5.34722	0.426857	0.356033		5.34722	0.716116	0.247057		5.34722	0.582211	0.329312		5.34722	0.700026	0.540279		5.34722	0.722278	0.589345		5.34722	0.569924	0.213345		5.34722	0.515543	0.189715		5.34722	0.663061	0.351093		5.34722	0.664547	0.26145		5.34722
	5.45635	0.222365	0.435369		5.45635	0.568089	0.389641		5.45635	0.247098	0.439054		5.45635	0.431019	0.2786		5.45635	0.645321	0.243225		5.45635	0.628793	0.314245		5.45635	0.665317	0.495152		5.45635	0.627272	0.5375		5.45635	0.661904	0.213792		5.45635	0.606291	0.195084		5.45635	0.523347	0.315659		5.45635	0.58662	0.286519		5.45635
	5.56548	0.155267	0.375193		5.56548	0.41851	0.37989		5.56548	0.254576	0.410501		5.56548	0.493194	0.23987		5.56548	0.62173	0.223574		5.56548	0.576063	0.271177		5.56548	0.671807	0.443729		5.56548	0.553601	0.430983		5.56548	0.695828	0.215326		5.56548	0.646373	0.210621		5.56548	0.431469	0.314631		5.56548	0.390275	0.259804		5.56548
	5.6746	0.112009	0.399465		5.6746	0.286309	0.448697		5.6746	0.255749	0.37147		5.6746	0.510547	0.234656		5.6746	0.631266	0.199242		5.6746	0.476421	0.243278		5.6746	0.583952	0.355471		5.6746	0.456039	0.383299		5.6746	0.710478	0.228543		5.6746	0.505728	0.169212		5.6746	0.397383	0.31843		5.6746	0.328668	0.248466		5.6746
	5.78373	0.132704	0.400044		5.78373	0.305949	0.438485		5.78373	0.245091	0.348478		5.78373	0.425128	0.158445		5.78373	0.556506	0.203431		5.78373	0.381392	0.227518		5.78373	0.512062	0.283715		5.78373	0.380457	0.308658		5.78373	0.633683	0.253182		5.78373	0.479407	0.187888		5.78373	0.417406	0.384683		5.78373	0.25248	0.256134		5.78373
	5.89286	0.123233	0.395667		5.89286	0.294615	0.500372		5.89286	0.249421	0.293521		5.89286	0.486029	0.151372		5.89286	0.461602	0.245893		5.89286	0.348037	0.20813		5.89286	0.507051	0.199893		5.89286	0.364293	0.321757		5.89286	0.525595	0.207878		5.89286	0.424335	0.219651		5.89286	0.368274	0.342531		5.89286	0.259078	0.264869		5.89286
	6.00198	0.149779	0.442909		6.00198	0.265938	0.496068		6.00198	0.232214	0.219854																						6.00198	0.424447	0.180035		6.00198	0.367761	0.227008		6.00198	0.368802	0.336755		6.00198	0.273295	0.278482		6.00198
	6.11111	0.152791	0.425829		6.11111	0.309673	0.403872		6.11111	0.277419	0.204526																						6.11111	0.334002	0.189316		6.11111	0.353098	0.256766		6.11111	0.377138	0.404813		6.11111	0.252975	0.270217		6.11111
																																																	6.22024
																																																	6.32937
[truncated: 17 more columns]

## Sheet: 5
endosome 5
max		345.682	332.746			343.451	296.786			336.97	279.983			360.567	295.275			369.378	292.201			359.061	312.885			370.075	320.706			360.978	317.699			398.07	345.552			375.096	318.191			338.372	352.739			350.395	350.69
min		277.037	247.174			294.84	267.639			297.999	254.75			295.371	258.752			325.241	239.204			302.293	266.718			295.418	254.455			318.725	263.884			298.961	255.358			293.533	254.909			276.736	258.982			278.959	266.545
	t97				t98				t99				t100				t101				t102				t103				t104				t105				t106				t107				t108				t109
		Rab5	Rab11			Rab5	Rab11			Rab5	Rab11			Rab5	Rab11			Rab5	Rab11			Rab5	Rab11			Rab5	Rab11			Rab5	Rab11			Rab5	Rab11			Rab5	Rab11			Rab5	Rab11			Rab5	Rab11
	0	313.746	276.801		0	306.137	273.526		0	309.255	254.75		0	318.151	258.752		0	347.005	254.913		0	302.293	275.458		0	316.007	255.685		0	352.687	273.609		0	333.204	283.751		0	303.306	286.339		0	299.781	284.487		0	299.509	290.267		0
	0.10913	300.17	271.025		0.10913	295.614	278.609		0.10913	308.879	260.831		0.10913	322.732	259.334		0.10913	337.174	255.589		0.10913	303.879	272.598		0.10913	314.352	257.755		0.10913	339.099	263.884		0.10913	315.447	281.454		0.10913	320.778	271.442		0.10913	281.571	267.102		0.10913	294.607	293.999		0.10913
	0.21825	298.767	273.045		0.21825	298.418	281.854		0.21825	307.067	258.773		0.21825	313.947	265.588		0.21825	330.528	258.383		0.21825	309.928	277.458		0.21825	310.628	254.7		0.21825	325.257	264.888		0.21825	318.495	279.814		0.21825	322.907	254.909		0.21825	283.979	266.654		0.21825	312.977	303.879		0.21825
	0.32738	282.651	270.339		0.32738	304.846	291.603		0.32738	305.062	258.281		0.32738	295.371	269.219		0.32738	337.29	262.363		0.32738	314.065	276.248		0.32738	295.418	261.388		0.32738	325.383	269.113		0.32738	324.183	289.987		0.32738	323.521	268.546		0.32738	284.041	265.619		0.32738	306.261	296.839		0.32738
	0.43651	279.527	269.476		0.43651	301.791	282.183		0.43651	306.205	260.138		0.43651	309.316	281.478		0.43651	341.69	258.115		0.43651	312.08	282.485		0.43651	305.573	254.455		0.43651	323.476	273.432		0.43651	337.957	297.268		0.43651	337.285	277.13		0.43651	289.571	264.117		0.43651	320.132	297.35		0.43651
	0.54563	278.962	264.722		0.54563	294.84	287.196		0.54563	300.097	262.127		0.54563	311.038	287.196		0.54563	329.135	266.477		0.54563	314.264	280.564		0.54563	310.245	260.937		0.54563	326.654	270.56		0.54563	356.839	312.46		0.54563	336.658	297.918		0.54563	298.905	265.319		0.54563	331.629	299.385		0.54563
	0.65476	277.037	265.148		0.65476	299.297	282.24		0.65476	302.923	257.914		0.65476	318.129	295.275		0.65476	332.573	279.649		0.65476	326.086	281.474		0.65476	313.936	259.629		0.65476	335.887	272.813		0.65476	379.591	329.415		0.65476	355.736	313.147		0.65476	299.759	269.928		0.65476	347.885	303.193		0.65476
	0.76389	288.456	254.816		0.76389	307.397	276.509		0.76389	310.286	265.296		0.76389	313.027	277.243		0.76389	325.241	277.044		0.76389	321.08	289.9		0.76389	316.056	261.752		0.76389	346.492	274.299		0.76389	398.07	337.66		0.76389	364.724	318.191		0.76389	314.882	277.133		0.76389	350.395	296.326		0.76389
	0.87302	295.638	254.026		0.87302	308.829	275.432		0.87302	314.955	264.466		0.87302	312.8	282.428		0.87302	333.807	273.922		0.87302	326.836	303.284		0.87302	312.579	270.699		0.87302	344.213	281.515		0.87302	387.409	345.552		0.87302	367.159	308.319		0.87302	333.552	281.717		0.87302	341.906	286.75		0.87302
	0.98214	293.617	254.396		0.98214	307.321	285.545		0.98214	316.199	262.839		0.98214	308.282	271.863		0.98214	329.378	279.349		0.98214	327.041	312.885		0.98214	317.051	261.764		0.98214	333.372	282.484		0.98214	367.712	331.454		0.98214	375.096	294.937		0.98214	338.372	284.426		0.98214	335.357	274.336		0.98214
	1.09127	286.243	247.174		1.09127	303.928	285.119		1.09127	319.376	264.726		1.09127	318.589	278.306		1.09127	331.793	266.576		1.09127	326.678	305.552		1.09127	335.732	265.668		1.09127	337.12	294.142		1.09127	357.57	304.276		1.09127	365.462	279.886		1.09127	332.101	297.738		1.09127	335.812	266.545		1.09127
	1.2004	293.87	251.483		1.2004	303.001	278.416		1.2004	319.261	264.449		1.2004	322.839	283.463		1.2004	328.882	268.16		1.2004	329.821	312.435		1.2004	329.197	264.437		1.2004	342.365	297.317		1.2004	354.868	283.131		1.2004	362.942	270.413		1.2004	331.456	295.802		1.2004	336.598	281.526		1.2004
	1.30952	296.988	257.547		1.30952	305.675	272.6		1.30952	323.433	268.23		1.30952	324.608	285.716		1.30952	339.095	262.023		1.30952	330.696	295.437		1.30952	318.675	261.553		1.30952	333.699	287.962		1.30952	348.863	283.002		1.30952	350.068	265.975		1.30952	327.139	295.176		1.30952	329.187	275.943		1.30952
	1.41865	301.03	252.261		1.41865	300.754	272.723		1.41865	324.974	260.61		1.41865	326.988	284.471		1.41865	337.592	253.795		1.41865	330.821	284.234		1.41865	316.961	267.058		1.41865	328.041	288.136		1.41865	342.142	280.546		1.41865	338.252	269.941		1.41865	316.561	295.466		1.41865	320.559	270.7		1.41865
	1.52778	293.127	260.069		1.52778	299.918	268.821		1.52778	319.214	263.591		1.52778	321.976	278.784		1.52778	341.024	251.517		1.52778	331.572	281.708		1.52778	323.864	268.977		1.52778	330.232	284.619		1.52778	329.98	279.726		1.52778	328.419	268.101		1.52778	313.457	310.566		1.52778	309.193	275.101		1.52778
	1.6369	302.308	264.957		1.6369	301.724	270.722		1.6369	315.288	263.225		1.6369	327.164	278.232		1.6369	355.975	244.729		1.6369	327.436	274.67		1.6369	326.035	272.932		1.6369	332.407	293.048		1.6369	322.425	268.441		1.6369	313.918	262.35		1.6369	322.346	317.192		1.6369	305.569	280.688		1.6369
	1.74603	296.411	275.022		1.74603	300.638	273.03		1.74603	297.999	254.901		1.74603	330.715	269.118		1.74603	338.731	249.284		1.74603	324.577	283.49		1.74603	322.968	262.138		1.74603	336.024	300.941		1.74603	321.261	263.801		1.74603	310.378	263.358		1.74603	313.349	332.845		1.74603	310.135	277.717		1.74603
	1.85516	296.648	278.731		1.85516	298.707	275.932		1.85516	313.315	262.886		1.85516	336.961	279.363		1.85516	346.757	243.353		1.85516	330.285	287.895		1.85516	314.476	278.859		1.85516	337.958	310.015		1.85516	319.264	261.507		1.85516	307.503	263.151		1.85516	307.244	350.867		1.85516	314.628	295.904		1.85516
	1.96429	303.331	290.067		1.96429	299.927	281.464		1.96429	312.148	267.49		1.96429	333.319	272.415		1.96429	346.624	239.204		1.96429	319.222	284.587		1.96429	319.856	288.443		1.96429	339.196	314.564		1.96429	315.216	255.358		1.96429	308.195	278.944		1.96429	301.375	352.47		1.96429	328.081	311.01		1.96429
	2.07341	304.011	291.567		2.07341	300.486	279.981		2.07341	327.333	268.567		2.07341	332.112	273.396		2.07341	346.38	247.256		2.07341	325.794	282.245		2.07341	311.777	291.887		2.07341	340.831	301.207		2.07341	318.288	261.98		2.07341	307.254	290.459		2.07341	304.595	352.739		2.07341	326.895	325.468		2.07341
	2.18254	304.337	293.555		2.18254	313.743	279.077		2.18254	315.356	275.269		2.18254	331.713	270.469		2.18254	340.123	254.38		2.18254	315.576	288.771		2.18254	305.796	288.205		2.18254	330.479	290.212		2.18254	325.316	260.356		2.18254	311.32	284.106		2.18254	303.437	336.174		2.18254	322.248	350.69		2.18254
	2.29167	302.997	295.177		2.29167	303.013	280.452		2.29167	321.101	279.983		2.29167	338.585	275.673		2.29167	339.762	260.503		2.29167	321.13	286.881		2.29167	305.453	306.718		2.29167	319.476	276.665		2.29167	321.288	263.001		2.29167	309.452	273.257		2.29167	294.549	312.23		2.29167	316.372	342.745		2.29167
	2.40079	305.767	294.652		2.40079	309.046	276.654		2.40079	313.265	275.06		2.40079	343.184	277.972		2.40079	339.581	268.506		2.40079	324.074	289.587		2.40079	311.353	315.245		2.40079	323.356	286.62		2.40079	317.233	272.29		2.40079	317.467	264.842		2.40079	289.277	289.026		2.40079	308.279	304.659		2.40079
	2.50992	310.738	283.153		2.50992	311.726	277.311		2.50992	311.522	264.952		2.50992	344.715	276.992		2.50992	332.294	279.006		2.50992	322.551	285.041		2.50992	319.527	316.094		2.50992	324.933	277.825		2.50992	311.094	274.576		2.50992	305.776	259.864		2.50992	287.161	268.798		2.50992	298.177	287.718		2.50992
	2.61905	305.337	287.621		2.61905	327.627	283.104		2.61905	324.557	266.128		2.61905	343.997	268.145		2.61905	332.747	289.047		2.61905	326.46	277.451		2.61905	329.534	311.934		2.61905	324.029	280.982		2.61905	303.774	277.446		2.61905	302.083	274.478		2.61905	277.745	271.969		2.61905	290.145	281.237		2.61905
	2.72817	309.471	291.944		2.72817	331.928	284.625		2.72817	330.123	263.458		2.72817	344.941	280.679		2.72817	325.818	283.876		2.72817	329.549	266.718		2.72817	325.693	309.11		2.72817	327.099	285.573		2.72817	300.299	277.771		2.72817	293.958	269.48		2.72817	286.026	271.558		2.72817	278.959	276.342		2.72817
	2.8373	313.936	293.26		2.8373	326.198	286.581		2.8373	324.792	265.828		2.8373	355.768	281.505		2.8373	325.523	292.201		2.8373	338.044	277.993		2.8373	332.671	314.379		2.8373	323.87	281.198		2.8373	301.164	291.53		2.8373	293.533	266.912		2.8373	276.779	274.265		2.8373	280.398	277.495		2.8373
	2.94643	316.155	302.012		2.94643	335.587	292.014		2.94643	315.828	259.738		2.94643	360.567	288.058		2.94643	328.144	285.98		2.94643	359.061	288.554		2.94643	346.503	306.091		2.94643	326.926	290.681		2.94643	299.095	297.341		2.94643	294.099	274.258		2.94643	276.736	265.411		2.94643	285.564	289.347		2.94643
	3.05556	318.906	312.556		3.05556	343.451	289.594		3.05556	304.793	262.436		3.05556	350.923	285.688		3.05556	327.938	283.854		3.05556	344.737	280.274		3.05556	366.932	310.925		3.05556	335.938	279.889		3.05556	300.609	291.502		3.05556	300.231	273.385		3.05556	281.466	260.895		3.05556	287.935	292.906		3.05556
	3.16468	316.6	330.972		3.16468	337.607	284.882		3.16468	314.149	264.526		3.16468	348.516	287.629		3.16468	334.363	284.314		3.16468	336.038	274.519		3.16468	370.075	315.267		3.16468	328.192	302.705		3.16468	299.075	282.204		3.16468	303.25	270.602		3.16468	281.766	258.982		3.16468	292.36	290.948		3.16468
	3.27381	319.563	332.746		3.27381	329.893	294.385		3.27381	319.26	263.423		3.27381	351.255	279.81		3.27381	334.472	281.122		3.27381	346.836	284.984		3.27381	359.27	320.706		3.27381	318.725	311.557		3.27381	302.186	289.221		3.27381	301.768	276.284		3.27381	280.51	261.986		3.27381	289.219	288.339		3.27381
	3.38294	316.568	307.307		3.38294	321.313	292.393		3.38294	323.787	264.8		3.38294	345.13	273.256		3.38294	350.015	275.596		3.38294	338.883	289.176		3.38294	358.508	314.924		3.38294	331.624	301.12		3.38294	298.961	277.601		3.38294	300.727	290.201		3.38294	282.497	267.572		3.38294	302.809	282.993		3.38294
	3.49206	317.193	292.193		3.49206	313.609	296.786		3.49206	325.249	269.419		3.49206	343.428	272.12		3.49206	352.83	271.06		3.49206	327.436	284.216		3.49206	347.241	304.067		3.49206	333.779	304.547		3.49206	302.235	278.277		3.49206	302.021	295.317		3.49206	288.971	274.578		3.49206	296.456	291.352		3.49206
	3.60119	325.987	283.189		3.60119	310.779	288.413		3.60119	323.348	271.457		3.60119	338.001	269.793		3.60119	354.158	273.083		3.60119	327.934	278.46		3.60119	330.871	297.109		3.60119	331.123	308.571		3.60119	304.38	281.249		3.60119	305.465	265.081		3.60119	286.003	277.373		3.60119	299.334	294.473		3.60119
	3.71032	333.849	290.955		3.71032	312.946	275.126		3.71032	328.021	267.774		3.71032	329.719	263.573		3.71032	349.686	275.772		3.71032	327.017	271.278		3.71032	320.805	293.256		3.71032	329.325	314.14		3.71032	307.212	272.783		3.71032	297.377	281.09		3.71032	290.789	285.211		3.71032	300.527	294.504		3.71032
	3.81944	336.325	293.878		3.81944	309.997	271.484		3.81944	333.983	264.649		3.81944	339.599	275.67		3.81944	346.615	257.928		3.81944	327.717	270.034		3.81944	313.164	292.97		3.81944	328.664	312.044		3.81944	310.168	264.207		3.81944	300.159	280.704		3.81944	287.415	279.926		3.81944	297.311	291.339		3.81944
	3.92857	345.682	279.404		3.92857	311.406	267.639		3.92857	336.97	264.054		3.92857	335.142	267.903		3.92857	358.389	253.367		3.92857	327.713	268.998		3.92857	330.352	294.344		3.92857	333.326	309.573		3.92857	315.646	269.021		3.92857	296.778	284.398		3.92857	295.406	287.635		3.92857	296.792	291.24		3.92857
									4.0377	334.5	273.005		4.0377	329.388	265.641		4.0377	369.378	262.131		4.0377	318.32	267.982		4.0377	328.47	285.082		4.0377	348.325	313.213		4.0377	326.157	271.733		4.0377	302.776	298.368		4.0377	296.758	289.404		4.0377	290.134	294.967		4.0377
									4.14683	330.652	264.778						4.14683	367.436	262.114		4.14683	316.62	271.62		4.14683	319.563	267.809		4.14683	351.476	317.699		4.14683	333.741	269.196		4.14683	307.387	306.211		4.14683	295.885	302.375		4.14683	287.016	295.629		4.14683
									4.25595	322.772	261.932						4.25595	352.199	266.696										4.25595	359.675	312.979		4.25595	342.508	268.063		4.25595	303.802	317.801		4.25595	306.547	318.036		4.25595	298.27	299.497		4.25595
																													4.36508	360.978	303.549		4.36508	352.662	276.66		4.36508	304.697	303.605		4.36508	300.75	324.584		4.36508	294.399	293.525		4.36508
																													4.47421	350.762	304.134		4.47421	352.643	287.816		4.47421	312.807	284.701		4.47421	311.466	335.547		4.47421	297.181	294.122		4.47421
																																	4.58333	352.928	285.624		4.58333	300.735	280.914		4.58333	312.862	329.684		4.58333	305.58	296.393		4.58333
																																	4.69246	339.606	292.162		4.69246	298	273.544		4.69246	309.2	308.261
																																	4.80159	336.754	287.499
line profiles normalised for individual min-max
max		345.682	332.746			343.451	296.786			336.97	279.983			360.567	295.275			369.378	292.201			359.061	312.885			370.075	320.706			360.978	317.699			398.07	345.552			375.096	318.191			338.372	352.739			350.395	350.69
min		277.037	247.174			294.84	267.639			297.999	254.75			295.371	258.752			325.241	239.204			302.293	266.718			295.418	254.455			318.725	263.884			298.961	255.358			293.533	254.909			276.736	258.982			278.959	266.545
	t97				t98				t99				t100				t101				t102				t103				t104				t105				t106				t107				t108				t109
		Rab5	Rab11			Rab5	Rab11			Rab5	Rab11			Rab5	Rab11			Rab5	Rab11			Rab5	Rab11			Rab5	Rab11			Rab5	Rab11			Rab5	Rab11			Rab5	Rab11			Rab5	Rab11			Rab5	Rab11
	0	0.534774	0.346222		0	0.232413	0.201995		0	0.288833	0		0	0.349415	0		0	0.493092	0.296426		0	0	0.189319		0	0.275777	0.0185687		0	0.803757	0.180712		0	0.345507	0.3148		0	0.119821	0.496662		0	0.373891	0.272029		0	0.287673	0.281925		0
	0.10913	0.337	0.278722		0.10913	0.0159203	0.376372		0.10913	0.279195	0.240972		0.10913	0.419683	0.0159351		0.10913	0.27035	0.309166		0.10913	0.027933	0.127369		0.10913	0.253621	0.0498226		0.10913	0.482193	0		0.10913	0.166338	0.289333		0.10913	0.334045	0.261253		0.10913	0.0784319	0.0866107		0.10913	0.21905	0.326273		0.10913
	0.21825	0.316565	0.302334		0.21825	0.0736049	0.487718		0.21825	0.232686	0.159414		0.21825	0.284929	0.187169		0.21825	0.11979	0.361895		0.21825	0.134504	0.232645		0.21825	0.203733	0.00370862		0.21825	0.154594	0.0186564		0.21825	0.197087	0.271152		0.21825	0.36014	0		0.21825	0.11751	0.0818281		0.21825	0.476196	0.443687		0.21825
	0.32738	0.0817934	0.270709		0.32738	0.205847	0.822185		0.32738	0.181232	0.139915		0.32738	0	0.286594		0.32738	0.272992	0.436984		0.32738	0.207372	0.206422		0.32738	0	0.104659		0.32738	0.157567	0.0971729		0.32738	0.254478	0.383934		0.32738	0.367667	0.215487		0.32738	0.118519	0.070789		0.32738	0.382184	0.360027		0.32738
	0.43651	0.0362751	0.260623		0.43651	0.143001	0.498998		0.43651	0.210575	0.213523		0.43651	0.213893	0.622242		0.43651	0.372681	0.356833		0.43651	0.172403	0.341529		0.43651	0.136031	0		0.43651	0.112444	0.177421		0.43651	0.39346	0.464667		0.43651	0.536427	0.351144		0.43651	0.208238	0.05477		0.43651	0.576359	0.366094		0.43651
	0.54563	0.028056	0.205068		0.54563	0	0.67097		0.54563	0.0538477	0.292358		0.54563	0.240305	0.778781		0.54563	0.0882226	0.514614		0.54563	0.210867	0.299919		0.54563	0.19861	0.0978505		0.54563	0.18765	0.124065		0.54563	0.583978	0.633103		0.54563	0.528732	0.679632		0.54563	0.359667	0.0675914		0.54563	0.737309	0.390278		0.54563
	0.65476	0	0.21005		0.65476	0.0917017	0.500964		0.65476	0.126345	0.125402		0.65476	0.34907	1		0.65476	0.166123	0.763156		0.65476	0.419132	0.319621		0.65476	0.248042	0.0781089		0.65476	0.406166	0.16593		0.65476	0.813546	0.821085		0.65476	0.762639	0.920294		0.65476	0.37352	0.11675		0.65476	0.964863	0.435541		0.65476
	0.76389	0.166355	0.0893104		0.76389	0.258317	0.304307		0.76389	0.315281	0.417963		0.76389	0.270821	0.506277		0.76389	0	0.714001		0.76389	0.330936	0.502132		0.76389	0.276444	0.110146		0.76389	0.657155	0.193536		0.76389	1	0.9125		0.76389	0.872834	1		0.76389	0.618879	0.193597		0.76389	1	0.353927		0.76389
	0.87302	0.270974	0.0800761		0.87302	0.287789	0.267381		0.87302	0.435106	0.385057		0.87302	0.267342	0.648247		0.87302	0.194072	0.655089		0.87302	0.432346	0.792051		0.87302	0.229861	0.245187		0.87302	0.603206	0.327626		0.87302	0.892429	1		0.87302	0.902689	0.843994		0.87302	0.9218	0.242485		0.87302	0.881175	0.240122		0.87302
	0.98214	0.241533	0.0843988		0.98214	0.256753	0.61434		0.98214	0.467022	0.320568		0.98214	0.198045	0.358962		0.98214	0.0937373	0.757505		0.98214	0.43595	1		0.98214	0.289774	0.110333		0.98214	0.346634	0.345624		0.98214	0.693682	0.843696		0.98214	1	0.632523		0.98214	1	0.271382		0.98214	0.789493	0.0925887		0.98214
	1.09127	0.134109	0		1.09127	0.186966	0.599708		1.09127	0.548536	0.395365		1.09127	0.356135	0.535382		1.09127	0.148439	0.516484		1.09127	0.429562	0.841175		1.09127	0.539995	0.169264		1.09127	0.435347	0.562259		1.09127	0.591358	0.542362		1.09127	0.881884	0.394692		1.09127	0.89825	0.413369		1.09127	0.795854	0		1.09127
	1.2004	0.24522	0.0503551		1.2004	0.167894	0.369751		1.2004	0.545588	0.384375		1.2004	0.421326	0.676575		1.2004	0.0825018	0.546376		1.2004	0.484925	0.990266		1.2004	0.452453	0.150675		1.2004	0.559489	0.62125		1.2004	0.564093	0.30792		1.2004	0.850989	0.24499		1.2004	0.887786	0.392714		1.2004	0.806857	0.178037		1.2004
	1.30952	0.290647	0.121224		1.30952	0.222901	0.170222		1.30952	0.652657	0.534218		1.30952	0.448458	0.738253		1.30952	0.313889	0.430572		1.30952	0.500333	0.622068		1.30952	0.311526	0.107151		1.30952	0.354378	0.44743		1.30952	0.503502	0.306489		1.30952	0.693146	0.17487		1.30952	0.817747	0.386044		1.30952	0.70312	0.111693		1.30952
	1.41865	0.349532	0.0594468		1.41865	0.121662	0.174415		1.41865	0.692197	0.232225		1.41865	0.484958	0.704174		1.41865	0.279832	0.275319		1.41865	0.502531	0.379416		1.41865	0.288559	0.190232		1.41865	0.220483	0.450661		1.41865	0.435688	0.279269		1.41865	0.548275	0.23754		1.41865	0.646123	0.389129		1.41865	0.582335	0.0493872		1.41865
	1.52778	0.234408	0.150697		1.52778	0.104472	0.0405596		1.52778	0.544374	0.350351		1.52778	0.408083	0.548456		1.52778	0.357596	0.23233		1.52778	0.515757	0.324692		1.52778	0.381022	0.219207		1.52778	0.272337	0.385304		1.52778	0.312976	0.270168		1.52778	0.427724	0.20846		1.52778	0.595774	0.550187		1.52778	0.423238	0.101688		1.52778
	1.6369	0.368142	0.207809		1.6369	0.141625	0.105794		1.6369	0.443653	0.335874		1.6369	0.487665	0.533345		1.6369	0.696324	0.10425		1.6369	0.442903	0.17225		1.6369	0.410099	0.278893		1.6369	0.323793	0.541936		1.6369	0.236744	0.145052		1.6369	0.249934	0.117581		1.6369	0.739985	0.620858		1.6369	0.372498	0.168081		1.6369
	1.74603	0.282238	0.325438		1.74603	0.11928	0.184971		1.74603	0	0.00596852		1.74603	0.542124	0.283826		1.74603	0.305627	0.190204		1.74603	0.392536	0.363287		1.74603	0.369022	0.115968		1.74603	0.409399	0.688591		1.74603	0.224998	0.0936082		1.74603	0.206531	0.133521		1.74603	0.594011	0.787814		1.74603	0.436423	0.132779		1.74603
	1.85516	0.285691	0.368775		1.85516	0.0795542	0.284532		1.85516	0.393015	0.322431		1.85516	0.637931	0.564309		1.85516	0.487489	0.0782906		1.85516	0.493098	0.458711		1.85516	0.255273	0.368367		1.85516	0.455187	0.857221		1.85516	0.204846	0.068173		1.85516	0.171288	0.130239		1.85516	0.49497	0.98003		1.85516	0.499309	0.348917		1.85516
	1.96429	0.383052	0.50125		1.96429	0.104645	0.47433		1.96429	0.36308	0.504914		1.96429	0.582061	0.374081		1.96429	0.484464	0		1.96429	0.298214	0.387047		1.96429	0.327345	0.513018		1.96429	0.484482	0.941745		1.96429	0.164009	0		1.96429	0.179765	0.379811		1.96429	0.399737	0.997129		1.96429	0.68764	0.528437		1.96429
	2.07341	0.392956	0.518785		2.07341	0.116153	0.42343		2.07341	0.752726	0.547558		2.07341	0.563549	0.400954		2.07341	0.478947	0.151945		2.07341	0.41398	0.336328		2.07341	0.219132	0.565008		2.07341	0.52317	0.693547		2.07341	0.195007	0.073414		2.07341	0.168233	0.56177		2.07341	0.451992	1		2.07341	0.671032	0.700253		2.07341
	2.18254	0.397699	0.542014		2.18254	0.388876	0.392418		2.18254	0.4454	0.813181		2.18254	0.55743	0.320791		2.18254	0.337165	0.286365		2.18254	0.233987	0.477691		2.18254	0.139007	0.509438		2.18254	0.278182	0.489232		2.18254	0.265912	0.055415		2.18254	0.218079	0.46138		2.18254	0.433196	0.823319		2.18254	0.605988	1		2.18254
	2.29167	0.378177	0.560971		2.29167	0.168133	0.439586		2.29167	0.592792	1		2.29167	0.662845	0.463299		2.29167	0.328995	0.401903		2.29167	0.331824	0.436754		2.29167	0.134417	0.788865		2.29167	0.0177691	0.237506		2.29167	0.225274	0.0847407		2.29167	0.195177	0.289937		2.29167	0.289002	0.567935		2.29167	0.523721	0.905576		2.29167
	2.40079	0.418534	0.554831		2.40079	0.292251	0.309292		2.40079	0.391727	0.80491		2.40079	0.733377	0.526229		2.40079	0.324885	0.552903		2.40079	0.383686	0.495353		2.40079	0.213442	0.91758		2.40079	0.109601	0.422481		2.40079	0.184361	0.187724		2.40079	0.293442	0.15696		2.40079	0.203464	0.320451		2.40079	0.410443	0.452961		2.40079
	2.50992	0.490957	0.420451		2.50992	0.347369	0.331847		2.50992	0.347009	0.404298		2.50992	0.756866	0.499404		2.50992	0.159804	0.751026		2.50992	0.356849	0.396883		2.50992	0.322939	0.930394		2.50992	0.146914	0.259063		2.50992	0.122422	0.21307		2.50992	0.150108	0.0783031		2.50992	0.169139	0.104701		2.50992	0.269025	0.251631		2.50992
	2.61905	0.412271	0.472663		2.61905	0.674487	0.530607		2.61905	0.681494	0.4509		2.61905	0.745856	0.257182		2.61905	0.170049	0.94048		2.61905	0.425722	0.232478		2.61905	0.456978	0.867602		2.61905	0.125531	0.317716		2.61905	0.0485587	0.244891		2.61905	0.104832	0.30924		2.61905	0.0163574	0.138522		2.61905	0.156588	0.174603		2.61905
	2.72817	0.472495	0.523186		2.72817	0.762959	0.582773		2.72817	0.824303	0.345116		2.72817	0.760325	0.600352		2.72817	0.0130774	0.842909		2.72817	0.480137	0		2.72817	0.405527	0.82498		2.72817	0.198177	0.403028		2.72817	0.0134983	0.248494		2.72817	0.00521068	0.230256		2.72817	0.150713	0.134135		2.72817	0	0.116437		2.72817
	2.8373	0.537537	0.538563		2.8373	0.645086	0.649894		2.8373	0.687514	0.439031		2.8373	0.926392	0.622956		2.8373	0.00639143	1		2.8373	0.629781	0.244218		2.8373	0.498986	0.904498		2.8373	0.121756	0.321735		2.8373	0.022227	0.401048		2.8373	0	0.189674		2.8373	0.000683047	0.163008		2.8373	0.0201427	0.130139		2.8373
	2.94643	0.569868	0.640842		2.94643	0.838224	0.836266		2.94643	0.457489	0.197678		2.94643	1	0.802396		2.94643	0.0657722	0.882609		2.94643	1	0.472988		2.94643	0.684258	0.779407		2.94643	0.19408	0.497952		2.94643	0.00134599	0.465469		2.94643	0.00694799	0.305762		2.94643	0	0.0685737		2.94643	0.0924613	0.270991		2.94643
	3.05556	0.609948	0.764062		3.05556	1	0.753252		3.05556	0.174342	0.304604		3.05556	0.852082	0.737514		3.05556	0.0610936	0.842496		3.05556	0.747671	0.293626		3.05556	0.957904	0.852377		3.05556	0.40738	0.297404		3.05556	0.0166221	0.40074		3.05556	0.0821216	0.291963		3.05556	0.0767381	0.0204101		3.05556	0.125652	0.313288		3.05556
	3.16468	0.576353	0.979271		3.16468	0.87979	0.591601		3.16468	0.414416	0.387426		3.16468	0.815168	0.790639		3.16468	0.206665	0.851172		3.16468	0.594432	0.168973		3.16468	1	0.917909		3.16468	0.224052	0.721373		3.16468	0.00115025	0.297642		3.16468	0.119135	0.247984		3.16468	0.0815941	0		3.16468	0.187584	0.290014		3.16468
	3.27381	0.619509	1		3.27381	0.721098	0.917642		3.27381	0.545557	0.343709		3.27381	0.857179	0.576558		3.27381	0.20915	0.79095		3.27381	0.784643	0.395653		3.27381	0.855267	1		3.27381	0	0.885865		3.27381	0.0325359	0.375447		3.27381	0.100967	0.337769		3.27381	0.0612195	0.0320476		3.27381	0.143621	0.259006		3.27381
	3.38294	0.575877	0.702713		3.38294	0.544594	0.849286		3.38294	0.661736	0.39829		3.38294	0.76323	0.397119		3.38294	0.561304	0.686675		3.38294	0.644559	0.486452		3.38294	0.84507	0.912735		3.38294	0.305267	0.691915		3.38294	0	0.246617		3.38294	0.0882064	0.557685		3.38294	0.0934557	0.0916172		3.38294	0.333864	0.195479		3.38294
	3.49206	0.584989	0.5261		3.49206	0.386107	1		3.49206	0.699251	0.58134		3.49206	0.737117	0.365996		3.49206	0.625071	0.601101		3.49206	0.442908	0.379024		3.49206	0.694144	0.748851		3.49206	0.356281	0.755603		3.49206	0.0330273	0.254107		3.49206	0.104068	0.638536		3.49206	0.198502	0.166346		3.49206	0.244925	0.294817		3.49206
	3.60119	0.713102	0.420872		3.60119	0.327894	0.712751		3.60119	0.650461	0.662105		3.60119	0.653878	0.302299		3.60119	0.655166	0.639262		3.60119	0.451682	0.254338		3.60119	0.47488	0.643825		3.60119	0.293426	0.830385		3.60119	0.0546721	0.287057		3.60119	0.146301	0.160735		3.60119	0.15035	0.196162		3.60119	0.285216	0.331909		3.60119
	3.71032	0.827633	0.511626		3.71032	0.37248	0.256889		3.71032	0.770378	0.516138		3.71032	0.526847	0.132004		3.71032	0.553841	0.689992		3.71032	0.435529	0.0987773		3.71032	0.340047	0.585672		3.71032	0.25085	0.933867		3.71032	0.0832437	0.193198		3.71032	0.0471401	0.413713		3.71032	0.22799	0.27975		3.71032	0.301925	0.332268		3.71032
	3.81944	0.863693	0.545791		3.81944	0.311815	0.131927		3.81944	0.923369	0.392293		3.81944	0.678386	0.4632		3.81944	0.484258	0.35331		3.81944	0.447861	0.0718313		3.81944	0.237702	0.58135		3.81944	0.235208	0.894915		3.81944	0.113068	0.0981074		3.81944	0.0812364	0.407615		3.81944	0.173257	0.223387		3.81944	0.256895	0.294656		3.81944
	3.92857	1	0.376641		3.92857	0.340796	0		3.92857	1	0.368732		3.92857	0.610021	0.250548		3.92857	0.751029	0.267236		3.92857	0.447793	0.0493778		3.92857	0.467927	0.602093		3.92857	0.345562	0.849002		3.92857	0.16835	0.15148		3.92857	0.0397888	0.465996		3.92857	0.302909	0.305608		3.92857	0.249638	0.293489		3.92857
									4.0377	0.936637	0.723479		4.0377	0.521777	0.188626		4.0377	1	0.432606		4.0377	0.282321	0.0273813		4.0377	0.44272	0.4623		4.0377	0.700536	0.916641		4.0377	0.2744	0.181558		4.0377	0.113322	0.686743		4.0377	0.324832	0.324476		4.0377	0.156425	0.337773		4.0377
									4.14683	0.837874	0.397406						4.14683	0.955999	0.432283		4.14683	0.252385	0.106177		4.14683	0.323415	0.201577		4.14683	0.775113	1		4.14683	0.350921	0.153427		4.14683	0.169862	0.810678		4.14683	0.310669	0.462823		4.14683	0.112783	0.345645		4.14683
									4.25595	0.635686	0.284602						4.25595	0.610771	0.518746										4.25595	0.969162	0.912287		4.25595	0.439379	0.140866		4.25595	0.125905	0.993829		4.25595	0.483654	0.629862		4.25595	0.270327	0.391606		4.25595
																													4.36508	1	0.737068		4.36508	0.541833	0.236174		4.36508	0.136882	0.7695		4.36508	0.389601	0.699706		4.36508	0.216128	0.320643		4.36508
																													4.47421	0.758203	0.747925		4.47421	0.54164	0.359864		4.47421	0.236311	0.470778		4.47421	0.563471	0.816634		4.47421	0.255083	0.327727		4.47421
																																	4.58333	0.544517	0.335562		4.58333	0.0883009	0.41094		4.58333	0.586119	0.754099		4.58333	0.372659	0.35472		4.58333
																																	4.69246	0.410102	0.408049		4.69246	0.0547686	0.294468		4.69246	0.526709	0.525606
																																	4.80159	0.381326	0.356351
line profiles normalised for overall min-max
max		345.682	332.746			343.451	296.786			336.97	279.983			360.567	295.275			369.378	292.201			359.061	312.885			370.075	320.706			360.978	317.699			398.07	345.552			375.096	318.191			338.372	352.739			350.395	350.69
min		277.037	247.174			294.84	267.639			297.999	254.75			295.371	258.752			325.241	239.204			302.293	266.718			295.418	254.455			318.725	263.884			298.961	255.358			293.533	254.909			276.736	258.982			278.959	266.545
max		398.07	361.733
min		267.443	239.204
max		398.07	361.733			398.07	361.733			398.07	361.733			398.07	361.733			398.07	361.733			398.07	361.733			398.07	361.733			398.07	361.733			398.07	361.733			398.07	361.733			398.07	361.733			398.07	361.733
min		267.443	239.204			267.443	239.204			267.443	239.204			267.443	239.204			267.443	239.204			267.443	239.204			267.443	239.204			267.443	239.204			267.443	239.204			267.443	239.204			267.443	239.204			267.443	239.204
	t97				t98				t99				t100				t101				t102				t103				t104				t105				t106				t107				t108				t109
		Rab5	Rab11			Rab5	Rab11			Rab5	Rab11			Rab5	Rab11			Rab5	Rab11			Rab5	Rab11			Rab5	Rab11			Rab5	Rab11			Rab5	Rab11			Rab5	Rab11			Rab5	Rab11			Rab5	Rab11
	0	0.354465	0.306842		0	0.296219	0.280119		0	0.320084	0.126881		0	0.388187	0.159542		0	0.609073	0.128213		0	0.266788	0.295885		0	0.37177	0.134508		0	0.65257	0.280792		0	0.503425	0.363566		0	0.27454	0.384685		0	0.247561	0.369568		0	0.245478	0.416748		0
	0.10913	0.250535	0.259701		0.10913	0.215654	0.321599		0.10913	0.317208	0.176504		0.10913	0.423258	0.164291		0.10913	0.533812	0.133723		0.10913	0.278927	0.272543		0.10913	0.359107	0.151406		0.10913	0.548555	0.201422		0.10913	0.367487	0.34482		0.10913	0.4083	0.263105		0.10913	0.108151	0.227689		0.10913	0.207951	0.447203		0.10913
	0.21825	0.239796	0.276191		0.21825	0.237121	0.348086		0.21825	0.303333	0.159709		0.21825	0.356003	0.215332		0.21825	0.48294	0.15653		0.21825	0.32524	0.312209		0.21825	0.330594	0.126473		0.21825	0.442589	0.209616		0.21825	0.390816	0.331437		0.21825	0.424594	0.128176		0.21825	0.126589	0.224029		0.21825	0.348575	0.527836		0.21825
	0.32738	0.116423	0.254105		0.32738	0.286333	0.427649		0.32738	0.287982	0.155693		0.32738	0.213795	0.244969		0.32738	0.534705	0.189008		0.32738	0.356908	0.302329		0.32738	0.214155	0.181056		0.32738	0.44355	0.244101		0.32738	0.43436	0.414455		0.32738	0.429294	0.239468		0.32738	0.127066	0.215582		0.32738	0.297163	0.470383		0.32738
	0.43651	0.092503	0.247061		0.43651	0.262945	0.350769		0.43651	0.296736	0.170852		0.43651	0.320548	0.345017		0.43651	0.568388	0.15434		0.43651	0.341711	0.353234		0.43651	0.2919	0.124467		0.43651	0.428955	0.279346		0.43651	0.539808	0.473884		0.43651	0.534667	0.30953		0.43651	0.169399	0.203325		0.43651	0.40335	0.47455		0.43651
	0.54563	0.0881838	0.208262		0.54563	0.20973	0.391678		0.54563	0.249979	0.187086		0.54563	0.333731	0.391678		0.54563	0.472273	0.222585		0.54563	0.358426	0.337556		0.54563	0.327666	0.177375		0.54563	0.453281	0.255912		0.54563	0.684357	0.59787		0.54563	0.529862	0.479184		0.54563	0.24085	0.213135		0.54563	0.491368	0.491158		0.54563
	0.65476	0.0734404	0.211742		0.65476	0.243855	0.351237		0.65476	0.271607	0.152705		0.65476	0.388015	0.457618		0.65476	0.498595	0.330087		0.65476	0.448934	0.34498		0.65476	0.355918	0.166701		0.65476	0.523963	0.2743		0.65476	0.858534	0.736243		0.65476	0.675913	0.603477		0.65476	0.247386	0.250751		0.65476	0.615809	0.522241		0.65476
	0.76389	0.16086	0.127419		0.76389	0.305858	0.304456		0.76389	0.327974	0.212952		0.76389	0.348961	0.310451		0.76389	0.442464	0.308826		0.76389	0.410606	0.413746		0.76389	0.372151	0.184023		0.76389	0.605149	0.286424		0.76389	1	0.803534		0.76389	0.744718	0.644643		0.76389	0.363157	0.309553		0.76389	0.635024	0.466194		0.76389
	0.87302	0.215838	0.12097		0.87302	0.316826	0.295672		0.87302	0.363722	0.206175		0.87302	0.347225	0.352769		0.87302	0.508039	0.283345		0.87302	0.454677	0.522981		0.87302	0.345527	0.257039		0.87302	0.587699	0.345317		0.87302	0.918384	0.867943		0.87302	0.76336	0.564071		0.87302	0.506089	0.346961		0.87302	0.570043	0.38804		0.87302
	0.98214	0.200367	0.123989		0.98214	0.305277	0.378207		0.98214	0.373244	0.192895		0.98214	0.312639	0.26654		0.98214	0.474137	0.327643		0.98214	0.456243	0.601333		0.98214	0.37977	0.184124		0.98214	0.504707	0.353222		0.98214	0.767591	0.752887		0.98214	0.824121	0.454853		0.98214	0.542987	0.369073		0.98214	0.519906	0.286723		0.98214
	1.09127	0.143915	0.0650465		1.09127	0.279307	0.374726		1.09127	0.397563	0.208298		1.09127	0.391541	0.319126		1.09127	0.49262	0.223394		1.09127	0.453467	0.541491		1.09127	0.522778	0.215988		1.09127	0.533402	0.448369		1.09127	0.689956	0.531075		1.09127	0.75037	0.332021		1.09127	0.494977	0.477719		1.09127	0.523385	0.223139		1.09127
	1.2004	0.202304	0.100214		1.2004	0.272209	0.320024		1.2004	0.396683	0.206035		1.2004	0.424078	0.361213		1.2004	0.47034	0.236323		1.2004	0.477526	0.597665		1.2004	0.472746	0.205937		1.2004	0.573558	0.474278		1.2004	0.66927	0.358501		1.2004	0.731079	0.254705		1.2004	0.490039	0.461914		1.2004	0.529402	0.345404		1.2004
	1.30952	0.226176	0.149707		1.30952	0.292679	0.27256		1.30952	0.428626	0.236892		1.30952	0.43762	0.379598		1.30952	0.548523	0.186235		1.30952	0.484223	0.458936		1.30952	0.392201	0.182404		1.30952	0.507212	0.397935		1.30952	0.623299	0.357449		1.30952	0.632522	0.218491		1.30952	0.456992	0.45681		1.30952	0.472671	0.299843		1.30952
	1.41865	0.25712	0.106563		1.41865	0.255005	0.273558		1.41865	0.440422	0.174703		1.41865	0.455836	0.369439		1.41865	0.537016	0.119083		1.41865	0.485178	0.367509		1.41865	0.379075	0.227325		1.41865	0.463901	0.399355		1.41865	0.571847	0.337412		1.41865	0.542065	0.250858		1.41865	0.376012	0.459171		1.41865	0.406619	0.257055		1.41865
	1.52778	0.196622	0.170291		1.52778	0.248608	0.241716		1.52778	0.396321	0.199028		1.52778	0.417469	0.323023		1.52778	0.563291	0.10049		1.52778	0.490926	0.34689		1.52778	0.43192	0.242992		1.52778	0.480674	0.37065		1.52778	0.478743	0.330712		1.52778	0.466793	0.235838		1.52778	0.352255	0.582411		1.52778	0.319614	0.292973		1.52778
	1.6369	0.2669	0.210177		1.6369	0.262433	0.257234		1.6369	0.366272	0.196047		1.6369	0.457188	0.318519		1.6369	0.677743	0.0450913		1.6369	0.459265	0.289453		1.6369	0.448539	0.275264		1.6369	0.497319	0.439443		1.6369	0.420905	0.238614		1.6369	0.355781	0.188903		1.6369	0.4203	0.636487		1.6369	0.291866	0.338567		1.6369
	1.74603	0.221757	0.292327		1.74603	0.254118	0.276069		1.74603	0.233914	0.12811		1.74603	0.484368	0.244143		1.74603	0.545731	0.0822686		1.74603	0.437376	0.361432		1.74603	0.425062	0.187171		1.74603	0.525009	0.503855		1.74603	0.411993	0.200746		1.74603	0.328681	0.197135		1.74603	0.351423	0.764239		1.74603	0.326824	0.314323		1.74603
	1.85516	0.223572	0.322592		1.85516	0.239335	0.299752		1.85516	0.351165	0.193279		1.85516	0.532185	0.327749		1.85516	0.60718	0.0338629		1.85516	0.481079	0.397386		1.85516	0.360051	0.323642		1.85516	0.53982	0.577918		1.85516	0.396703	0.182024		1.85516	0.306675	0.19544		1.85516	0.304692	0.91132		1.85516	0.361214	0.462753		1.85516
	1.96429	0.274735	0.415111		1.96429	0.248672	0.344901		1.96429	0.342234	0.230858		1.96429	0.5043	0.271046		1.96429	0.606158	0		1.96429	0.396386	0.370384		1.96429	0.401242	0.401854		1.96429	0.549296	0.615041		1.96429	0.36572	0.131841		1.96429	0.311968	0.324336		1.96429	0.259756	0.924403		1.96429	0.464206	0.586037		1.96429
	2.07341	0.27994	0.427357		2.07341	0.252954	0.332793		2.07341	0.458481	0.239639		2.07341	0.495061	0.279057		2.07341	0.604294	0.0657207		2.07341	0.446695	0.351275		2.07341	0.339395	0.429965		2.07341	0.56181	0.506031		2.07341	0.389238	0.185881		2.07341	0.304768	0.418312		2.07341	0.284413	0.9266		2.07341	0.455124	0.704029		2.07341
	2.18254	0.282432	0.44358		2.18254	0.354444	0.325416		2.18254	0.366794	0.294339		2.18254	0.492007	0.255162		2.18254	0.556388	0.123861		2.18254	0.368474	0.404537		2.18254	0.293601	0.399919		2.18254	0.482565	0.416295		2.18254	0.443035	0.172632		2.18254	0.335891	0.366464		2.18254	0.275544	0.791406		2.18254	0.419553	0.909876		2.18254
	2.29167	0.272173	0.456819		2.29167	0.272298	0.336636		2.29167	0.410766	0.33281		2.29167	0.54462	0.29764		2.29167	0.553627	0.173834		2.29167	0.410992	0.389113		2.29167	0.290978	0.551004		2.29167	0.398331	0.305736		2.29167	0.412202	0.194219		2.29167	0.321592	0.277919		2.29167	0.207507	0.595991		2.29167	0.374565	0.845032		2.29167
	2.40079	0.293381	0.452531		2.40079	0.318487	0.305642		2.40079	0.350781	0.292636		2.40079	0.579822	0.316398		2.40079	0.552238	0.239146		2.40079	0.43353	0.411192		2.40079	0.336143	0.6206		2.40079	0.428035	0.386978		2.40079	0.381161	0.270025		2.40079	0.382948	0.209241		2.40079	0.167146	0.40662		2.40079	0.312617	0.534204		2.40079
	2.50992	0.33144	0.358683		2.50992	0.338998	0.311007		2.50992	0.33744	0.210138		2.50992	0.591546	0.308402		2.50992	0.49646	0.32484		2.50992	0.421867	0.37409		2.50992	0.398724	0.627528		2.50992	0.440105	0.315204		2.50992	0.334166	0.288682		2.50992	0.293451	0.168617		2.50992	0.15095	0.241531		2.50992	0.23528	0.395944		2.50992
	2.61905	0.29009	0.395147		2.61905	0.46073	0.358288		2.61905	0.437229	0.219735		2.61905	0.586051	0.236202		2.61905	0.499922	0.406785		2.61905	0.451798	0.312146		2.61905	0.475332	0.593577		2.61905	0.433188	0.340964		2.61905	0.278125	0.312106		2.61905	0.26518	0.287888		2.61905	0.0788611	0.267411		2.61905	0.173792	0.343046		2.61905
	2.72817	0.321738	0.43043		2.72817	0.493653	0.370698		2.72817	0.479835	0.19795		2.72817	0.593272	0.338492		2.72817	0.446883	0.364582		2.72817	0.475446	0.224553		2.72817	0.445926	0.570531		2.72817	0.456686	0.378434		2.72817	0.251524	0.314758		2.72817	0.202977	0.247095		2.72817	0.142256	0.264054		2.72817	0.0881601	0.303101		2.72817
	2.8373	0.355918	0.44117		2.8373	0.449789	0.386665		2.8373	0.439025	0.21729		2.8373	0.676156	0.34523		2.8373	0.444624	0.432529		2.8373	0.540478	0.316569		2.8373	0.49934	0.613526		2.8373	0.431967	0.34273		2.8373	0.258147	0.427053		2.8373	0.199723	0.226136		2.8373	0.0714653	0.286146		2.8373	0.0991754	0.312511		2.8373
	2.94643	0.372907	0.512599		2.94643	0.521662	0.430998		2.94643	0.3704	0.167589		2.94643	0.712893	0.398717		2.94643	0.464688	0.381754		2.94643	0.701368	0.402765		2.94643	0.605229	0.54589		2.94643	0.455361	0.420125		2.94643	0.242304	0.474474		2.94643	0.204062	0.286092		2.94643	0.071143	0.213887		2.94643	0.138724	0.409239		2.94643
	3.05556	0.39397	0.598654		3.05556	0.581865	0.411251		3.05556	0.285927	0.189608		3.05556	0.639068	0.379377		3.05556	0.463107	0.364404		3.05556	0.591711	0.335185		3.05556	0.761626	0.585345		3.05556	0.524356	0.332043		3.05556	0.253894	0.426826		3.05556	0.251	0.278965		3.05556	0.107351	0.177033		3.05556	0.156875	0.438286		3.05556
	3.16468	0.376315	0.748953		3.16468	0.537131	0.372798		3.16468	0.35755	0.206663		3.16468	0.620644	0.395213		3.16468	0.512293	0.368156		3.16468	0.525116	0.288219		3.16468	0.785685	0.620778		3.16468	0.465056	0.518253		3.16468	0.242156	0.350936		3.16468	0.274111	0.256252		3.16468	0.109643	0.161415		3.16468	0.190743	0.422303		3.16468
	3.27381	0.398994	0.763429		3.27381	0.478075	0.450356		3.27381	0.396674	0.197661		3.27381	0.641612	0.3314		3.27381	0.513133	0.342109		3.27381	0.607778	0.373627		3.27381	0.702966	0.665164		3.27381	0.392583	0.590498		3.27381	0.265969	0.408209		3.27381	0.262767	0.302623		3.27381	0.100029	0.185938		3.27381	0.166701	0.401008		3.27381
	3.38294	0.376065	0.55581		3.38294	0.412392	0.434096		3.38294	0.431335	0.2089		3.38294	0.594722	0.277913		3.38294	0.632122	0.297007		3.38294	0.5469	0.407838		3.38294	0.697138	0.61798		3.38294	0.491326	0.505315		3.38294	0.241283	0.313377		3.38294	0.254799	0.416202		3.38294	0.115239	0.23152		3.38294	0.270739	0.357382		3.38294
	3.49206	0.380854	0.432466		3.49206	0.353414	0.469948		3.49206	0.442527	0.246596		3.49206	0.581689	0.268636		3.49206	0.653668	0.259994		3.49206	0.459267	0.367361		3.49206	0.610879	0.529369		3.49206	0.507827	0.533287		3.49206	0.266341	0.31889		3.49206	0.264703	0.457959		3.49206	0.164805	0.288701		3.49206	0.222101	0.425601		3.49206
	3.60119	0.448177	0.358976		3.60119	0.33175	0.401617		3.60119	0.427971	0.263228		3.60119	0.540144	0.24965		3.60119	0.663836	0.276499		3.60119	0.46308	0.320382		3.60119	0.485563	0.472581		3.60119	0.487496	0.566131		3.60119	0.282764	0.343144		3.60119	0.291074	0.21119		3.60119	0.142085	0.311516		3.60119	0.244135	0.451074		3.60119
	3.71032	0.508364	0.422357		3.71032	0.348343	0.293177		3.71032	0.463747	0.233169		3.71032	0.476743	0.198889		3.71032	0.6296	0.298442		3.71032	0.45606	0.26177		3.71032	0.408502	0.441138		3.71032	0.473724	0.611581		3.71032	0.304441	0.274055		3.71032	0.229158	0.341845		3.71032	0.178719	0.375476		3.71032	0.253272	0.45132		3.71032
	3.81944	0.527313	0.446218		3.81944	0.325767	0.263451		3.81944	0.50939	0.207666		3.81944	0.552376	0.297611		3.81944	0.606089	0.152817		3.81944	0.46142	0.251618		3.81944	0.350009	0.438802		3.81944	0.468665	0.594473		3.81944	0.32707	0.204058		3.81944	0.250447	0.338696		3.81944	0.152893	0.332348		3.81944	0.228647	0.42549		3.81944
	3.92857	0.598943	0.328086		3.92857	0.336552	0.232068		3.92857	0.532252	0.202814		3.92857	0.518255	0.234224		3.92857	0.696227	0.115587		3.92857	0.46139	0.243158		3.92857	0.481589	0.450017		3.92857	0.50436	0.574308		3.92857	0.369013	0.243346		3.92857	0.224567	0.368848		3.92857	0.214069	0.395262		3.92857	0.224678	0.424689		3.92857
									4.0377	0.513348	0.275866		4.0377	0.474213	0.215767		4.0377	0.780351	0.187115		4.0377	0.389479	0.23487		4.0377	0.467183	0.374432		4.0377	0.619182	0.604015		4.0377	0.449475	0.265486		4.0377	0.270481	0.482856		4.0377	0.224413	0.4097		4.0377	0.173704	0.4551		4.0377
									4.14683	0.483884	0.208718						4.14683	0.765484	0.186975		4.14683	0.376469	0.264558		4.14683	0.398996	0.233459		4.14683	0.643304	0.640627		4.14683	0.507533	0.244779		4.14683	0.305785	0.546865		4.14683	0.21773	0.51556		4.14683	0.149837	0.460507		4.14683
									4.25595	0.423563	0.185489						4.25595	0.648836	0.224373										4.25595	0.706072	0.602103		4.25595	0.574647	0.235533		4.25595	0.278338	0.641456		4.25595	0.299352	0.643376		4.25595	0.235992	0.49207		4.25595
																													4.36508	0.716047	0.525146		4.36508	0.652381	0.30569		4.36508	0.285192	0.525597		4.36508	0.254974	0.69682		4.36508	0.206353	0.443337		4.36508
																													4.47421	0.637835	0.529915		4.47421	0.652234	0.396738		4.47421	0.347276	0.371317		4.47421	0.337014	0.786292		4.47421	0.227656	0.448202		4.47421
																																	4.58333	0.654417	0.378849		4.58333	0.254858	0.340413		4.58333	0.3477	0.73844		4.58333	0.291954	0.466739		4.58333
																																	4.69246	0.552434	0.432207		4.69246	0.233921	0.280259		4.69246	0.319667	0.563601
																																	4.80159	0.530601	0.394152
[truncated: 8 more columns]

## Sheet: 6
endosome 6
max		315.88	356.063			389.299	294.88			358.748	293.786			343.27	311.608			345.645	309.062			342.372	353.764			329.709	305.666			332.742	325.176			330.437	320.116			353.51	320.503			352.678	339.521			361.648	337.678
min		246.213	221.943			277.204	240.952			294.849	221.674			278.811	233.368			284.573	244.899			263.185	236.137			273.563	246.34			284.191	265.229			279.662	277.634			255.483	252.826			261.756	269.044			258.389	244.289
	t101				t102				t103				t104				t105				t106				t107				t108				t109				t110				t111				t112				t113
		Rab5	Rab11			Rab5	Rab11			Rab5	Rab11			Rab5	Rab11			Rab5	Rab11			Rab5	Rab11			Rab5	Rab11			Rab5	Rab11			Rab5	Rab11			Rab5	Rab11			Rab5	Rab11			Rab5	Rab11
	0	249.027	240.322		0	293.675	246.695		0	310.422	228.578		0	300.838	239.988		0	298.285	248.213		0	274.614	267.253		0	292.391	280.301		0	308.368	305.769		0	302.071	310.406		0	266.121	277.146		0	270.233	269.044		0	296.879	258.01		0
	0.10913	253.724	245.646		0.10913	298.028	251.941		0.10913	302.829	225.367		0.10913	289.474	242.589		0.10913	304.993	248.35		0.10913	263.185	257.543		0.10913	286.62	280.022		0.10913	286.376	308.528		0.10913	295.491	311.482		0.10913	265.282	265.199		0.10913	261.756	274.3		0.10913	289.21	252.098		0.10913
	0.21825	252.191	259.843		0.21825	290.758	249.478		0.21825	294.849	221.674		0.21825	278.811	239.389		0.21825	302.332	252.345		0.21825	263.301	251.024		0.21825	278.976	272.272		0.21825	284.191	307.116		0.21825	292.863	291.021		0.21825	260.086	260.526		0.21825	264.086	272.895		0.21825	280.346	253.667		0.21825
	0.32738	255.647	272.465		0.32738	285.125	240.952		0.32738	306.625	224.999		0.32738	280.255	239.449		0.32738	293.37	250.493		0.32738	268.324	242.663		0.32738	280.088	259.682		0.32738	285.073	302.246		0.32738	279.662	302.465		0.32738	269.777	260.69		0.32738	265.331	283.49		0.32738	265.462	246.394		0.32738
	0.43651	270.568	280.498		0.43651	286.181	251.956		0.43651	305.369	233.12		0.43651	285.97	237.755		0.43651	300.618	253.021		0.43651	283.012	238.617		0.43651	273.563	256.131		0.43651	298.659	281.494		0.43651	284.33	297.427		0.43651	255.483	254.812		0.43651	278.267	293.918		0.43651	258.527	244.289		0.43651
	0.54563	283.413	291.559		0.54563	277.204	251.601		0.54563	315.503	230.269		0.54563	290.292	238.174		0.54563	295.095	259.483		0.54563	273.253	236.45		0.54563	282.357	260.123		0.54563	299.09	276.869		0.54563	295.866	289.267		0.54563	259.441	252.826		0.54563	290.987	296.623		0.54563	258.389	244.863		0.54563
	0.65476	289.275	287.332		0.65476	287.651	265.762		0.65476	324.106	239.988		0.65476	281.897	238.085		0.65476	284.573	255.594		0.65476	272.975	236.137		0.65476	280.615	256.172		0.65476	299.333	271.977		0.65476	303.009	286.663		0.65476	265.14	258.101		0.65476	300.503	312.123		0.65476	266.275	246.204		0.65476
	0.76389	286.555	287.381		0.76389	291.917	263.585		0.76389	341.29	238.969		0.76389	280.166	245.12		0.76389	289.232	257.609		0.76389	276.404	242.481		0.76389	281.266	262.453		0.76389	312.288	274.47		0.76389	311.377	283.309		0.76389	262.294	260.066		0.76389	309.179	288.255		0.76389	263.025	252.245		0.76389
	0.87302	288.665	287.461		0.87302	294.631	260.227		0.87302	348.523	249.514		0.87302	278.969	245.129		0.87302	300.202	255.782		0.87302	277.695	243.162		0.87302	284.194	266.615		0.87302	318.009	272.37		0.87302	318.922	286.64		0.87302	260.914	261.279		0.87302	319.846	280.82		0.87302	270.225	262.341		0.87302
	0.98214	289.55	288.953		0.98214	301.083	254.999		0.98214	344.184	254.486		0.98214	282.308	246.707		0.98214	310.577	246.394		0.98214	286.348	244.763		0.98214	294.091	272.651		0.98214	313.696	271.949		0.98214	323.937	283.284		0.98214	268.723	266.263		0.98214	331.712	287.161		0.98214	281.986	274.648		0.98214
	1.09127	283.581	294.09		1.09127	302.007	249.395		1.09127	341.349	254.635		1.09127	285.889	250.263		1.09127	318.498	251.592		1.09127	300.873	253.526		1.09127	300.748	270.665		1.09127	312.805	272.548		1.09127	327.74	283.311		1.09127	280.665	267.4		1.09127	345.88	281.542		1.09127	289.29	281.054		1.09127
	1.2004	295.4	297.248		1.2004	306.735	248.043		1.2004	341.492	257.112		1.2004	289.291	250.044		1.2004	321.638	260.683		1.2004	319.733	261.216		1.2004	303.686	269.331		1.2004	307.505	278.109		1.2004	325.961	286.115		1.2004	286.185	270.689		1.2004	352.678	280.294		1.2004	301.923	285.991		1.2004
	1.30952	303.108	303.093		1.30952	302.624	249.106		1.30952	330.606	261.181		1.30952	286.289	245.461		1.30952	320.509	271.719		1.30952	331.583	266.108		1.30952	305.428	271.977		1.30952	303.315	275.565		1.30952	324.743	288.718		1.30952	283.157	275.57		1.30952	348.711	291.69		1.30952	316.346	280.596		1.30952
	1.41865	302.541	289.624		1.41865	298.768	256.817		1.41865	343.674	264.283		1.41865	298.409	256.166		1.41865	327.749	265.07		1.41865	330.529	267.3		1.41865	305.767	276.714		1.41865	305.413	274.81		1.41865	330.437	293.603		1.41865	291.994	277.138		1.41865	325.824	295.193		1.41865	321.303	274.624		1.41865
	1.52778	303.336	275.631		1.52778	309.95	255.886		1.52778	354.122	264.616		1.52778	314.752	259.197		1.52778	324.415	278.666		1.52778	342.372	278.642		1.52778	314.549	274.395		1.52778	307.006	289.93		1.52778	327.148	303.873		1.52778	293.143	276.541		1.52778	306.714	291.813		1.52778	317.429	280.46		1.52778
	1.6369	300.453	276.85		1.6369	302.618	257.898		1.6369	351.536	267.082		1.6369	318.88	267.95		1.6369	342.427	280.004		1.6369	337.969	282.486		1.6369	319.075	271.339		1.6369	309.516	294.698		1.6369	330.279	304.755		1.6369	290.699	276.35		1.6369	290.654	288.08		1.6369	313.102	277.63		1.6369
	1.74603	294.587	276.005		1.74603	312.186	257.767		1.74603	345.36	273.414		1.74603	320.781	268.141		1.74603	335.957	282.65		1.74603	323.804	294.621		1.74603	304.821	265.894		1.74603	318.137	291.094		1.74603	329.513	302.849		1.74603	285.591	276.561		1.74603	284.266	276.289		1.74603	299.101	280.432		1.74603
	1.85516	308.749	278.22		1.85516	312.503	261.197		1.85516	333.996	264.901		1.85516	325.457	273.312		1.85516	327.021	287.772		1.85516	325.241	289.319		1.85516	311.86	268.917		1.85516	309.702	290.502		1.85516	320.897	299.127		1.85516	285.618	276.884		1.85516	296.269	277.222		1.85516	290.918	280.553		1.85516
	1.96429	315.88	271.663		1.96429	311.228	262.532		1.96429	325.952	266.18		1.96429	324.551	273.819		1.96429	327.58	284.639		1.96429	323.001	287.18		1.96429	310.198	276		1.96429	307.779	300.594		1.96429	319.47	297.977		1.96429	281.713	276.358		1.96429	289.913	282.587		1.96429	291.834	282.757		1.96429
	2.07341	306.221	269.467		2.07341	310.018	266.892		2.07341	326.622	263.382		2.07341	321.706	271.676		2.07341	337.543	286.94		2.07341	321.718	278.651		2.07341	318.232	271.586		2.07341	317.316	291.329		2.07341	322.584	287.214		2.07341	291.479	284.179		2.07341	300.034	288.616		2.07341	307.783	280.592		2.07341
	2.18254	295.351	272.396		2.18254	312.538	268.69		2.18254	322.609	268.908		2.18254	328.486	265.889		2.18254	329.522	295.445		2.18254	320.607	274.859		2.18254	325.363	264.575		2.18254	311.034	283.269		2.18254	314.81	281.609		2.18254	318.891	290.123		2.18254	316.474	295.768		2.18254	333.598	286.621		2.18254
	2.29167	290.062	258.432		2.29167	302.432	276.465		2.29167	320.402	264.906		2.29167	322.09	274.882		2.29167	312.45	280.462		2.29167	315.517	278.108		2.29167	304.914	285.217		2.29167	329.302	285.291		2.29167	314.182	287.226		2.29167	310.18	290.831		2.29167	324.655	311.11		2.29167	354.236	293.833		2.29167
	2.40079	282.146	255.955		2.40079	314.523	272.378		2.40079	322.93	272.133		2.40079	315.346	277.619		2.40079	305.888	279.326		2.40079	301.235	276.786		2.40079	312.832	287.588		2.40079	332.742	287.617		2.40079	315.742	288.116		2.40079	310.389	299.793		2.40079	319.685	301.648		2.40079	361.648	300.323		2.40079
	2.50992	282.465	264.974		2.50992	316.832	269.781		2.50992	333.15	284.359		2.50992	312.5	265.489		2.50992	315.297	276.1		2.50992	293.787	271.793		2.50992	309.049	305.666		2.50992	327.546	310.11		2.50992	323.114	287.45		2.50992	319.635	302.62		2.50992	326.519	303.109		2.50992	355.89	307.641		2.50992
	2.61905	285.193	260.025		2.61905	308.479	256.297		2.61905	333.49	282.147		2.61905	319.103	267.52		2.61905	304.008	266.479		2.61905	299.642	258.473		2.61905	307.504	296.93		2.61905	314.072	324.907		2.61905	326.38	284.84		2.61905	325.89	312.907		2.61905	311.336	296.35		2.61905	351.5	309.129		2.61905
	2.72817	282.068	258.596		2.72817	314.864	261.31		2.72817	340.517	286.818		2.72817	323.064	269.317		2.72817	292.396	268.2		2.72817	292.665	251.314		2.72817	311.043	297.484		2.72817	317.252	325.176		2.72817	324.044	288.868		2.72817	330.418	308.024		2.72817	314.286	291.213		2.72817	352.469	319.367		2.72817
	2.8373	278.814	252.257		2.8373	313.632	258.027		2.8373	339.316	291.993		2.8373	321.708	283.904		2.8373	302.471	266.115		2.8373	291.784	254.349		2.8373	297.165	290.414		2.8373	309.542	314.322		2.8373	326.172	292.179		2.8373	343.76	308.331		2.8373	317.748	294.199		2.8373	347.284	329.6		2.8373
	2.94643	274.742	247.082		2.94643	323.659	257.617		2.94643	345.533	293.786		2.94643	310.515	281.507		2.94643	309.242	262.401		2.94643	294.603	250.434		2.94643	292.875	268.82		2.94643	293.105	303.872		2.94643	319.367	293.914		2.94643	349.21	312.393		2.94643	323.882	300.537		2.94643	340.786	332.86		2.94643
	3.05556	281.054	249.595		3.05556	326.052	266.731		3.05556	350.252	288.786		3.05556	316.353	283.333		3.05556	308.7	261.645		3.05556	294.584	245.422		3.05556	297.65	266.085		3.05556	291.836	290.731		3.05556	317.813	277.634		3.05556	353.51	301.965		3.05556	331.754	322.136		3.05556	329.174	330.147		3.05556
	3.16468	271.195	254.889		3.16468	337.444	258.584		3.16468	355.719	291.903		3.16468	333.962	279.099		3.16468	314.261	260.042		3.16468	302.849	250.877		3.16468	296.863	258.267		3.16468	289.714	273.872		3.16468	309.629	285.075		3.16468	331.958	286.932		3.16468	325.344	337.766		3.16468	329.474	337.678		3.16468
	3.27381	272.777	272.9		3.27381	338.803	253.302		3.27381	358.748	287.537		3.27381	342.03	276.596		3.27381	319.426	266.889		3.27381	298.592	254.073		3.27381	287.586	251.844		3.27381	299.518	274.278		3.27381	301.129	281.286		3.27381	311.726	279.484		3.27381	325.87	339.521		3.27381	325.487	330.183		3.27381
	3.38294	270.58	280.881		3.38294	355.671	261.349		3.38294	349.999	270.997		3.38294	343.27	275.242		3.38294	326.224	264.993		3.38294	310.217	258.398		3.38294	281.205	257.932		3.38294	297.482	279.883		3.38294	298.71	288.603		3.38294	300.841	272.297		3.38294	319.463	323.984		3.38294	315.535	323.048		3.38294
	3.49206	272.008	295.054		3.49206	374.953	272.5		3.49206	341.585	261.982		3.49206	341.522	269.241		3.49206	334.921	260.059		3.49206	317.691	252.559		3.49206	292.211	256.87		3.49206	295.318	276.729		3.49206	299.21	289.004		3.49206	301.089	273.523		3.49206	317.192	304.702		3.49206	311.652	315.237		3.49206
	3.60119	276.351	321.792		3.60119	388.894	285.749		3.60119	338.3	265.633		3.60119	335.468	261.611		3.60119	333.158	256.378		3.60119	331.259	250.909		3.60119	288.025	256.868		3.60119	293.39	288.039		3.60119	300.653	293.942		3.60119	287.926	257.312		3.60119	305.305	305.764		3.60119	296.008	309.26		3.60119
	3.71032	281.249	347.229		3.71032	389.299	294.88		3.71032	341.947	269.39		3.71032	324.843	267.556		3.71032	345.645	265.693		3.71032	328.739	255.835		3.71032	298.154	246.34		3.71032	311.13	294.903		3.71032	299.303	292.589		3.71032	287.805	260.292		3.71032	308.381	298.054		3.71032	295.796	304.766		3.71032
	3.81944	288.411	356.063		3.81944	374.388	288.507		3.81944	339.106	246.926		3.81944	329.533	266.221		3.81944	342.949	268.206		3.81944	330.099	259.953		3.81944	295.626	252.431		3.81944	319.047	314.383		3.81944	307.779	287.829		3.81944	274.825	259.613		3.81944	310.923	302.601		3.81944	303.483	302.442		3.81944
	3.92857	283.279	329.526		3.92857	349.199	287.278		3.92857	335.801	236.631		3.92857	330.61	282.639		3.92857	341.235	271.378		3.92857	328.525	268.557		3.92857	298.291	256.674		3.92857	310.587	316.651		3.92857	317.818	294.192		3.92857	277.368	271.298		3.92857	309.042	305.66		3.92857	297.273	302.912		3.92857
	4.0377	287.623	296.887		4.0377	327.519	294.666		4.0377	336.456	243.269		4.0377	328.637	292.764		4.0377	337.551	280.302		4.0377	317.17	263.86		4.0377	302.116	259.211		4.0377	318.689	320.944		4.0377	319.234	292.376		4.0377	288.318	273.194		4.0377	316.778	311.085		4.0377	292.42	295.819		4.0377
	4.14683	286.786	262.064		4.14683	312.093	289.141		4.14683	337.226	237.21		4.14683	325.122	311.608		4.14683	341.803	293.781		4.14683	323.456	263.421		4.14683	298.693	258.171		4.14683	313.79	296.396		4.14683	324.338	296.179		4.14683	291.364	272.496		4.14683	319.999	310.791		4.14683	305.028	286.546		4.14683
	4.25595	274.456	238.885		4.25595	313.024	286.933		4.25595	333.189	233.938		4.25595	319.697	297.789		4.25595	327.628	299.25		4.25595	321.933	262.654		4.25595	305.703	262.542		4.25595	306.242	282.817		4.25595	322.525	287.019		4.25595	297.37	273.775		4.25595	323.761	316.315		4.25595	321.019	278.566		4.25595
	4.36508	270.351	227.835		4.36508	320.598	294.723		4.36508	325.665	234.577		4.36508	321.116	274.333		4.36508	322.048	309.062		4.36508	317.419	285.369		4.36508	318.495	252.242		4.36508	310.591	279.12		4.36508	311.889	285.659		4.36508	307.978	276.01		4.36508	326.567	323.651		4.36508	330.785	276.175		4.36508
	4.47421	262.958	222.943		4.47421	304.182	279.433		4.47421	318.282	236.838		4.47421	318.828	266.464		4.47421	321.778	295.857		4.47421	311.3	320.545		4.47421	326.844	247.841		4.47421	310.299	281.889		4.47421	312.759	289.959		4.47421	307.281	279.072		4.47421	314.491	305.255		4.47421	325.991	282.099		4.47421
	4.58333	261.625	221.943		4.58333	297.673	274.098		4.58333	309.991	231.682		4.58333	304.485	256.613		4.58333	325.839	262.397		4.58333	297.113	340.195		4.58333	324.392	254.48		4.58333	299.051	277.682		4.58333	316.865	281.423		4.58333	305.544	282.714		4.58333	305.337	296.549		4.58333	324.574	299.374		4.58333
	4.69246	251.096	222.319		4.69246	305.186	268.485						4.69246	303.163	261.717		4.69246	320.614	253.917		4.69246	287.868	353.764		4.69246	328.464	256.597		4.69246	316.054	265.229		4.69246	314.515	278.319		4.69246	295.452	288.077		4.69246	306.819	292.324		4.69246	340.712	297.577		4.69246
	4.80159	246.213	226.227										4.80159	288.549	246.173		4.80159	339.054	258.987		4.80159	294.317	335.079		4.80159	329.709	263.536		4.80159	309.955	266.435		4.80159	325.541	283.438		4.80159	298.592	299.918		4.80159	301.533	290.914		4.80159	335.616	316.897		4.80159
	4.91071	250.158	229.236										4.91071	299.916	233.368		4.91071	319.405	254.045		4.91071	292.379	307.501		4.91071	310.314	264.645		4.91071	308.219	274.143		4.91071	321.519	302.682		4.91071	281.082	320.503		4.91071	287.415	283.833		4.91071	316.345	322.654		4.91071
																	5.01984	312.09	248.683		5.01984	278.056	300.661		5.01984	305.814	269.338		5.01984	302.781	286.613		5.01984	315.806	310.787		5.01984	278.499	311.946		5.01984	277.851	279.184		5.01984	303.15	315.674		5.01984
																	5.12897	308.331	250.83		5.12897	276.431	296.906										5.12897	307.723	320.116										5.12897	303.6	308.262		5.12897
																	5.2381	302.989	244.899		5.2381	271.646	290.554																						5.2381	306.657	297.663		5.2381
																																													5.34722	299.645	285.662		5.34722
																																													5.45635	289.411	275.633		5.45635
line profiles normalised for individual min-max
max		315.88	356.063			389.299	294.88			358.748	293.786			343.27	311.608			345.645	309.062			342.372	353.764			329.709	305.666			332.742	325.176			330.437	320.116			353.51	320.503			352.678	339.521			361.648	337.678
min		246.213	221.943			277.204	240.952			294.849	221.674			278.811	233.368			284.573	244.899			263.185	236.137			273.563	246.34			284.191	265.229			279.662	277.634			255.483	252.826			261.756	269.044			258.389	244.289
	t101				t102				t103				t104				t105				t106				t107				t108				t109				t110				t111				t112				t113
		Rab5	Rab11			Rab5	Rab11			Rab5	Rab11			Rab5	Rab11			Rab5	Rab11			Rab5	Rab11			Rab5	Rab11			Rab5	Rab11			Rab5	Rab11			Rab5	Rab11			Rab5	Rab11			Rab5	Rab11
	0	0.0403961	0.137034		0	0.146938	0.106488		0	0.243706	0.0957365		0	0.341713	0.0846195		0	0.224522	0.0516495		0	0.144336	0.264531		0	0.335344	0.572443		0	0.49797	0.676271		0	0.441342	0.771439		0	0.108517	0.359354		0	0.0932332	0		0	0.372752	0.146926		0
	0.10913	0.107822	0.17673		0.10913	0.185771	0.203768		0.10913	0.124877	0.0512116		0.10913	0.165428	0.117852		0.10913	0.334367	0.0537831		0.10913	0	0.181982		0.10913	0.232555	0.567735		0.10913	0.0450184	0.72229		0.10913	0.311745	0.796767		0.10913	0.0999568	0.182821		0.10913	0	0.0745724		0.10913	0.298482	0.0836206		0.10913
	0.21825	0.0858145	0.282583		0.21825	0.120915	0.158096		0.21825	0	0		0.21825	0	0.0769624		0.21825	0.2908	0.116059		0.21825	0.00147246	0.126561		0.21825	0.0964006	0.437113		0.21825	0	0.698734		0.21825	0.25999	0.315123		0.21825	0.0469527	0.113775		0.21825	0.0256177	0.0546352		0.21825	0.21264	0.100419		0.21825
	0.32738	0.13542	0.376693		0.32738	0.0706633	0		0.32738	0.184292	0.0461099		0.32738	0.0224048	0.0777267		0.32738	0.14404	0.0871838		0.32738	0.0649006	0.0554805		0.32738	0.11622	0.224887		0.32738	0.0181705	0.617499		0.32738	0	0.584509		0.32738	0.14582	0.116197		0.32738	0.0393108	0.204965		0.32738	0.0684977	0.0225421		0.32738
	0.43651	0.349601	0.436587		0.43651	0.0800839	0.204046		0.43651	0.164628	0.15873		0.43651	0.111065	0.0560743		0.43651	0.262725	0.126586		0.43651	0.25038	0.0210836		0.43651	0	0.165034		0.43651	0.298008	0.271333		0.43651	0.0919329	0.465916		0.43651	0	0.0293425		0.43651	0.181586	0.352928		0.43651	0.00133645	0		0.43651
	0.54563	0.533968	0.519058		0.54563	0	0.197463		0.54563	0.323223	0.119192		0.54563	0.178107	0.061436		0.54563	0.172289	0.227304		0.54563	0.127143	0.00266095		0.54563	0.156633	0.232315		0.54563	0.306873	0.19418		0.54563	0.319145	0.273845		0.54563	0.0403749	0		0.54563	0.321493	0.391313		0.54563	0	0.00614629		0.54563
	0.65476	0.618109	0.487541		0.65476	0.0931977	0.460065		0.65476	0.457861	0.25397		0.65476	0.0478813	0.0602959		0.65476	0	0.166695		0.65476	0.123639	0		0.65476	0.125601	0.165729		0.65476	0.311891	0.112569		0.65476	0.459818	0.212542		0.65476	0.0985144	0.0779429		0.65476	0.426152	0.611242		0.65476	0.0763711	0.0205065		0.65476
	0.76389	0.579078	0.487906		0.76389	0.131255	0.419693		0.76389	0.726789	0.239831		0.76389	0.021021	0.150203		0.76389	0.0762888	0.198088		0.76389	0.166944	0.0539332		0.76389	0.137193	0.271591		0.76389	0.578722	0.154153		0.76389	0.624627	0.133595		0.76389	0.0694824	0.106977		0.76389	0.521582	0.272579		0.76389	0.0448968	0.0851957		0.76389
	0.87302	0.609353	0.488503		0.87302	0.155466	0.357414		0.87302	0.839983	0.386063		0.87302	0.00245736	0.150324		0.87302	0.25592	0.169627		0.87302	0.183235	0.0597227		0.87302	0.189344	0.341743		0.87302	0.696558	0.119128		0.87302	0.773223	0.212003		0.87302	0.0554055	0.124896		0.87302	0.638899	0.167091		0.87302	0.114624	0.193302		0.87302
	0.98214	0.622063	0.499627		0.98214	0.213025	0.260468		0.98214	0.772077	0.45501		0.98214	0.0542559	0.17049		0.98214	0.425805	0.0233077		0.98214	0.292513	0.0733335		0.98214	0.365626	0.443493		0.98214	0.60772	0.112111		0.98214	0.871992	0.133007		0.98214	0.13506	0.198546		0.98214	0.769403	0.257066		0.98214	0.228522	0.32508		0.98214
	1.09127	0.536388	0.537929		1.09127	0.221268	0.156559		1.09127	0.72771	0.457076		1.09127	0.109799	0.215936		1.09127	0.555503	0.104321		1.09127	0.475946	0.147832		1.09127	0.48418	0.410022		1.09127	0.589358	0.122088		1.09127	0.946878	0.133645		1.09127	0.256891	0.215347		1.09127	0.925228	0.177329		1.09127	0.299257	0.393674		1.09127
	1.2004	0.706029	0.561475		1.2004	0.263446	0.131488		1.2004	0.729949	0.491429		1.2004	0.162583	0.213136		1.2004	0.606919	0.246002		1.2004	0.71411	0.213208		1.2004	0.536506	0.387537		1.2004	0.480197	0.214864		1.2004	0.911847	0.199638		1.2004	0.313197	0.263945		1.2004	1	0.159621		1.2004	0.4216	0.446544		1.2004
	1.30952	0.816677	0.605055		1.30952	0.226772	0.151198		1.30952	0.559583	0.547852		1.30952	0.116009	0.154565		1.30952	0.588421	0.418004		1.30952	0.863754	0.254797		1.30952	0.567537	0.432132		1.30952	0.393905	0.172425		1.30952	0.887856	0.260924		1.30952	0.282305	0.336063		1.30952	0.956369	0.321316		1.30952	0.561278	0.388768		1.30952
	1.41865	0.808528	0.50463		1.41865	0.192373	0.294194		1.41865	0.764086	0.590874		1.41865	0.304032	0.291381		1.41865	0.706975	0.31437		1.41865	0.850439	0.264931		1.41865	0.573577	0.511982		1.41865	0.437109	0.159823		1.41865	1	0.375896		1.41865	0.372459	0.359233		1.41865	0.704652	0.37102		1.41865	0.609283	0.324823		1.41865
	1.52778	0.81994	0.400298		1.52778	0.292127	0.276928		1.52778	0.927601	0.59549		1.52778	0.557574	0.33013		1.52778	0.652387	0.526279		1.52778	1	0.361354		1.52778	0.729995	0.472886		1.52778	0.469928	0.412047		1.52778	0.93522	0.617659		1.52778	0.384178	0.350411		1.52778	0.494469	0.323065		1.52778	0.571766	0.387317		1.52778
	1.6369	0.778559	0.409387		1.6369	0.226718	0.314232		1.6369	0.887124	0.629681		1.6369	0.621622	0.441992		1.6369	0.94731	0.547127		1.6369	0.944403	0.394034		1.6369	0.810592	0.421386		1.6369	0.521628	0.49159		1.6369	0.996888	0.638407		1.6369	0.359244	0.347592		1.6369	0.317829	0.270104		1.6369	0.529862	0.357018		1.6369
	1.74603	0.694365	0.403087		1.74603	0.312075	0.311814		1.74603	0.790482	0.717497		1.74603	0.651103	0.444436		1.74603	0.841369	0.588366		1.74603	0.765523	0.497199		1.74603	0.556728	0.32959		1.74603	0.699184	0.431464		1.74603	0.981804	0.593541		1.74603	0.307137	0.35071		1.74603	0.247575	0.102796		1.74603	0.394271	0.387017		1.74603
	1.85516	0.897637	0.419602		1.85516	0.314903	0.375404		1.85516	0.612632	0.599444		1.85516	0.723657	0.510537		1.85516	0.695053	0.668187		1.85516	0.783665	0.452124		1.85516	0.682103	0.380549		1.85516	0.525457	0.421592		1.85516	0.812119	0.505946		1.85516	0.30741	0.355478		1.85516	0.379589	0.11603		1.85516	0.315023	0.388314		1.85516
	1.96429	1	0.370713		1.96429	0.303528	0.400159		1.96429	0.486745	0.617179		1.96429	0.709588	0.517008		1.96429	0.704206	0.619359		1.96429	0.755375	0.433939		1.96429	0.652498	0.499945		1.96429	0.485853	0.589938		1.96429	0.784004	0.478857		1.96429	0.267578	0.347717		1.96429	0.309676	0.192161		1.96429	0.323894	0.411915		1.96429
	2.07341	0.86136	0.354339		2.07341	0.292734	0.481008		2.07341	0.497235	0.578371		2.07341	0.665464	0.489622		2.07341	0.86735	0.655227		2.07341	0.739181	0.361431		2.07341	0.795583	0.425546		2.07341	0.68228	0.435382		2.07341	0.845345	0.225522		2.07341	0.367209	0.463273		2.07341	0.420996	0.277701		2.07341	0.478351	0.388728		2.07341
	2.18254	0.705331	0.376178		2.18254	0.315215	0.514352		2.18254	0.434435	0.655		2.18254	0.770632	0.415659		2.18254	0.736005	0.787776		2.18254	0.725151	0.329193		2.18254	0.9226	0.307368		2.18254	0.552883	0.300935		2.18254	0.692241	0.0935767		2.18254	0.646843	0.5511		2.18254	0.601808	0.37919		2.18254	0.728353	0.453291		2.18254
	2.29167	0.629414	0.272062		2.29167	0.225059	0.658519		2.29167	0.399894	0.599508		2.29167	0.671415	0.530591		2.29167	0.456459	0.554264		2.29167	0.660862	0.356814		2.29167	0.558379	0.655306		2.29167	0.929145	0.334665		2.29167	0.679861	0.225807		2.29167	0.557981	0.56156		2.29167	0.691795	0.596868		2.29167	0.928219	0.530515		2.29167
	2.40079	0.515783	0.253594		2.40079	0.332923	0.582749		2.40079	0.439458	0.699726		2.40079	0.566794	0.56558		2.40079	0.349018	0.536554		2.40079	0.480511	0.345575		2.40079	0.699405	0.695271		2.40079	1	0.373469		2.40079	0.710581	0.246752		2.40079	0.56011	0.693991		2.40079	0.637127	0.462617		2.40079	1	0.600009		2.40079
	2.50992	0.520365	0.32084		2.50992	0.353522	0.534581		2.50992	0.599399	0.869274		2.50992	0.522647	0.41054		2.50992	0.503086	0.486284		2.50992	0.38646	0.303128		2.50992	0.632027	1		2.50992	0.892992	0.74868		2.50992	0.855768	0.231077		2.50992	0.654433	0.735761		2.50992	0.71229	0.483348		2.50992	0.944237	0.678366		2.50992
	2.61905	0.559516	0.28394		2.61905	0.279004	0.28454		2.61905	0.604717	0.838588		2.61905	0.625082	0.436508		2.61905	0.318243	0.336343		2.61905	0.460395	0.189888		2.61905	0.604509	0.852747		2.61905	0.615454	0.995519		2.61905	0.920101	0.169643		2.61905	0.718242	0.887765		2.61905	0.545297	0.38744		2.61905	0.901723	0.694295		2.61905
	2.72817	0.514669	0.273285		2.72817	0.335965	0.3775		2.72817	0.714678	0.903373		2.72817	0.686524	0.459475		2.72817	0.128103	0.36315		2.72817	0.372286	0.129026		2.72817	0.667543	0.86208		2.72817	0.680966	1		2.72817	0.874098	0.264443		2.72817	0.76443	0.815615		2.72817	0.577741	0.314557		2.72817	0.911107	0.803926		2.72817
	2.8373	0.467954	0.226021		2.8373	0.324974	0.316631		2.8373	0.695891	0.975128		2.8373	0.665493	0.645912		2.8373	0.293076	0.330659		2.8373	0.361157	0.154828		2.8373	0.420362	0.74291		2.8373	0.522151	0.818947		2.8373	0.916004	0.342386		2.8373	0.900544	0.82015		2.8373	0.615825	0.356916		2.8373	0.860893	0.913501		2.8373
	2.94643	0.409513	0.187437		2.94643	0.414425	0.309019		2.94643	0.793182	1		2.94643	0.491851	0.615276		2.94643	0.403942	0.272779		2.94643	0.39676	0.121545		2.94643	0.343965	0.37891		2.94643	0.183614	0.644618		2.94643	0.781978	0.383216		2.94643	0.95614	0.880174		2.94643	0.683293	0.446851		2.94643	0.797964	0.948407		2.94643
	3.05556	0.50011	0.206174		3.05556	0.435773	0.478017		3.05556	0.867038	0.930657		3.05556	0.582408	0.638609		3.05556	0.395056	0.260992		3.05556	0.39652	0.078936		3.05556	0.429004	0.332811		3.05556	0.157466	0.425422		3.05556	0.751382	0		3.05556	1	0.72609		3.05556	0.76987	0.753325		3.05556	0.685509	0.91935		3.05556
	3.16468	0.358588	0.245646		3.16468	0.537401	0.326949		3.16468	0.952595	0.973882		3.16468	0.855597	0.584497		3.16468	0.486116	0.236015		3.16468	0.500894	0.125311		3.16468	0.414994	0.201032		3.16468	0.11377	0.144177		3.16468	0.590199	0.175174		3.16468	0.780146	0.503959		3.16468	0.699364	0.975102		3.16468	0.688415	1		3.16468
	3.27381	0.381304	0.379936		3.27381	0.549525	0.229016		3.27381	1	0.913333		3.27381	0.980763	0.552507		3.27381	0.570701	0.342727		3.27381	0.44714	0.152482		3.27381	0.249758	0.092774		3.27381	0.315693	0.15096		3.27381	0.422796	0.085983		3.27381	0.573751	0.393905		3.27381	0.705158	1		3.27381	0.649803	0.91974		3.27381
	3.38294	0.34977	0.439442		3.38294	0.700004	0.378236		3.38294	0.863075	0.683973		3.38294	1	0.535195		3.38294	0.682004	0.313181		3.38294	0.593936	0.189251		3.38294	0.136108	0.195385		3.38294	0.273754	0.244451		3.38294	0.375154	0.258206		3.38294	0.462709	0.287705		3.38294	0.634685	0.779551		3.38294	0.553424	0.843339		3.38294
	3.49206	0.370263	0.545116		3.49206	0.872019	0.585006		3.49206	0.731405	0.558966		3.49206	0.972868	0.458496		3.49206	0.824415	0.236278		3.49206	0.688325	0.139611		3.49206	0.332128	0.177489		3.49206	0.229182	0.191849		3.49206	0.385	0.267642		3.49206	0.465244	0.305814		3.49206	0.609707	0.505946		3.49206	0.515819	0.759705		3.49206
	3.60119	0.432608	0.744475		3.60119	0.996387	0.830678		3.60119	0.679987	0.609592		3.60119	0.878963	0.360977		3.60119	0.795539	0.178909		3.60119	0.859667	0.125583		3.60119	0.257579	0.177454		3.60119	0.189488	0.380512		3.60119	0.413405	0.383892		3.60119	0.330959	0.0662859		3.60119	0.47897	0.521015		3.60119	0.364317	0.695705		3.60119
	3.71032	0.502905	0.934134		3.71032	1	1		3.71032	0.737062	0.661695		3.71032	0.714124	0.436963		3.71032	1	0.324081		3.71032	0.827835	0.167462		3.71032	0.437977	0		3.71032	0.554873	0.495001		3.71032	0.386833	0.35203		3.71032	0.329727	0.110319		3.71032	0.512797	0.411625		3.71032	0.362264	0.647581		3.71032
	3.81944	0.605705	1		3.81944	0.866979	0.88182		3.81944	0.692601	0.350174		3.81944	0.786889	0.419897		3.81944	0.955868	0.363254		3.81944	0.845008	0.202471		3.81944	0.39296	0.102667		3.81944	0.717935	0.819961		3.81944	0.553756	0.239979		3.81944	0.19731	0.100281		3.81944	0.540764	0.476143		3.81944	0.436708	0.62269		3.81944
	3.92857	0.532047	0.80214		3.92857	0.642268	0.859038		3.92857	0.640886	0.20742		3.92857	0.803585	0.629734		3.92857	0.92779	0.412686		3.92857	0.82514	0.275617		3.92857	0.44042	0.17419		3.92857	0.543674	0.857798		3.92857	0.751467	0.38976		3.92857	0.223252	0.272947		3.92857	0.52007	0.519549		3.92857	0.376568	0.627729		3.92857
	4.0377	0.594399	0.558783		4.0377	0.44886	0.996034		4.0377	0.651126	0.299464		4.0377	0.772987	0.759154		4.0377	0.867469	0.551775		4.0377	0.681748	0.235686		4.0377	0.508545	0.216941		4.0377	0.710558	0.929404		4.0377	0.779368	0.34702		4.0377	0.334954	0.300964		4.0377	0.605151	0.596515		4.0377	0.329569	0.551779		4.0377
	4.14683	0.582383	0.299143		4.14683	0.311245	0.893577		4.14683	0.66319	0.215448		4.14683	0.718451	1		4.14683	0.937099	0.761842		4.14683	0.761124	0.231954		4.14683	0.447582	0.199412		4.14683	0.609654	0.519907		4.14683	0.879874	0.436539		4.14683	0.366029	0.290647		4.14683	0.640577	0.592346		4.14683	0.45167	0.452484		4.14683
	4.25595	0.405407	0.12632		4.25595	0.31955	0.852631		4.25595	0.600011	0.170073		4.25595	0.634289	0.823377		4.25595	0.704992	0.847071		4.25595	0.741894	0.225433		4.25595	0.572432	0.273088		4.25595	0.454179	0.293404		4.25595	0.844183	0.220927		4.25595	0.427297	0.309542		4.25595	0.681961	0.670726		4.25595	0.606533	0.367033		4.25595
	4.36508	0.346485	0.0439308		4.36508	0.387118	0.997083		4.36508	0.482256	0.178936		4.36508	0.656312	0.523585		4.36508	0.613632	1		4.36508	0.684891	0.418543		4.36508	0.800269	0.0994844		4.36508	0.543757	0.231723		4.36508	0.634705	0.188905		4.36508	0.535515	0.342572		4.36508	0.712816	0.774817		4.36508	0.701111	0.341436		4.36508
	4.47421	0.240367	0.00745601		4.47421	0.240671	0.713566		4.47421	0.366707	0.210281		4.47421	0.620803	0.423002		4.47421	0.609203	0.794202		4.47421	0.60762	0.71759		4.47421	0.948979	0.0252891		4.47421	0.53774	0.277922		4.47421	0.651845	0.290127		4.47421	0.528408	0.387819		4.47421	0.580003	0.5138		4.47421	0.654684	0.40487		4.47421
	4.58333	0.221235	0		4.58333	0.182604	0.614627		4.58333	0.236959	0.138782		4.58333	0.398291	0.297103		4.58333	0.675694	0.272724		4.58333	0.428453	0.884644		4.58333	0.905295	0.137201		4.58333	0.306082	0.20773		4.58333	0.732706	0.089189		4.58333	0.510685	0.441623		4.58333	0.479318	0.390268		4.58333	0.640961	0.589847		4.58333
	4.69246	0.0701028	0.00280346		4.69246	0.249628	0.510547						4.69246	0.37778	0.362333		4.69246	0.590144	0.140557		4.69246	0.311711	1		4.69246	0.977827	0.172889		4.69246	0.656291	0		4.69246	0.686429	0.0161383		4.69246	0.407734	0.520877		4.69246	0.495618	0.330316		4.69246	0.797248	0.570607		4.69246
	4.80159	0	0.0319415										4.80159	0.151069	0.16367		4.80159	0.892091	0.219568		4.80159	0.393147	0.84115		4.80159	1	0.289857		4.80159	0.530672	0.0201311		4.80159	0.903585	0.136634		4.80159	0.439771	0.695841		4.80159	0.437481	0.310308		4.80159	0.747896	0.777471		4.80159
	4.91071	0.0566317	0.0543767										4.91071	0.327418	0		4.91071	0.570352	0.142552		4.91071	0.368673	0.606697		4.91071	0.654566	0.308536		4.91071	0.494916	0.148696		4.91071	0.824353	0.589617		4.91071	0.261142	1		4.91071	0.282209	0.209834		4.91071	0.561268	0.839117		4.91071
																	5.01984	0.450574	0.0589792		5.01984	0.187804	0.548548		5.01984	0.574416	0.387647		5.01984	0.382908	0.356725		5.01984	0.711845	0.780391		5.01984	0.234788	0.873562		5.01984	0.177018	0.143872		5.01984	0.433483	0.764377		5.01984
																	5.12897	0.389025	0.0924469		5.12897	0.167282	0.516625										5.12897	0.552645	1										5.12897	0.437841	0.685019		5.12897
																	5.2381	0.301554	0		5.2381	0.106851	0.462623																						5.2381	0.467446	0.571522		5.2381
																																													5.34722	0.399539	0.443017		5.34722
																																													5.45635	0.300429	0.335625		5.45635
line profiles normalised for overall min-max
max		315.88	356.063			389.299	294.88			358.748	293.786			343.27	311.608			345.645	309.062			342.372	353.764			329.709	305.666			332.742	325.176			330.437	320.116			353.51	320.503			352.678	339.521			361.648	337.678
min		246.213	221.943			277.204	240.952			294.849	221.674			278.811	233.368			284.573	244.899			263.185	236.137			273.563	246.34			284.191	265.229			279.662	277.634			255.483	252.826			261.756	269.044			258.389	244.289
max		389.299	356.063
min		246.213	221.674
max		389.299	356.063			389.299	356.063			389.299	356.063			389.299	356.063			389.299	356.063			389.299	356.063			389.299	356.063			389.299	356.063			389.299	356.063			389.299	356.063			389.299	356.063			389.299	356.063
min		246.213	221.674			246.213	221.674			246.213	221.674			246.213	221.674			246.213	221.674			246.213	221.674			246.213	221.674			246.213	221.674			246.213	221.674			246.213	221.674			246.213	221.674			246.213	221.674
	t101				t102				t103				t104				t105				t106				t107				t108				t109				t110				t111				t112				t113
		Rab5	Rab11			Rab5	Rab11			Rab5	Rab11			Rab5	Rab11			Rab5	Rab11			Rab5	Rab11			Rab5	Rab11			Rab5	Rab11			Rab5	Rab11			Rab5	Rab11			Rab5	Rab11			Rab5	Rab11
	0	0.0196685	0.138762		0	0.331705	0.186182		0	0.448746	0.0513717		0	0.381763	0.13628		0	0.363921	0.197477		0	0.198494	0.339158		0	0.322733	0.43625		0	0.434389	0.62576		0	0.390383	0.660266		0	0.139135	0.412772		0	0.167876	0.352488		0	0.354097	0.270381		0
	0.10913	0.0524976	0.178378		0.10913	0.362127	0.225218		0.10913	0.39568	0.0274799		0.10913	0.302348	0.155627		0.10913	0.410805	0.198495		0.10913	0.118615	0.266905		0.10913	0.2824	0.434171		0.10913	0.280696	0.646288		0.10913	0.344395	0.668272		0.10913	0.13327	0.323873		0.10913	0.108633	0.391595		0.10913	0.3005	0.226388		0.10913
	0.21825	0.0417824	0.284019		0.21825	0.311319	0.206891		0.21825	0.339913	0		0.21825	0.227824	0.131822		0.21825	0.39221	0.228228		0.21825	0.11943	0.218396		0.21825	0.228974	0.376508		0.21825	0.265421	0.63578		0.21825	0.326029	0.516016		0.21825	0.0969581	0.289102		0.21825	0.124911	0.38114		0.21825	0.238552	0.238062		0.21825
	0.32738	0.0659349	0.377941		0.32738	0.271951	0.14345		0.32738	0.422213	0.0247423		0.32738	0.237917	0.132267		0.32738	0.32957	0.214442		0.32738	0.154532	0.156182		0.32738	0.236751	0.282821		0.32738	0.271586	0.599543		0.32738	0.23377	0.601174		0.32738	0.164691	0.290322		0.32738	0.133612	0.459976		0.32738	0.134531	0.183943		0.32738
	0.43651	0.170218	0.437715		0.43651	0.279331	0.22533		0.43651	0.413432	0.0851736		0.43651	0.277858	0.119661		0.43651	0.380227	0.233255		0.43651	0.257181	0.126075		0.43651	0.191147	0.2564		0.43651	0.366539	0.445128		0.43651	0.266393	0.563684		0.43651	0.0647916	0.246583		0.43651	0.224018	0.53757		0.43651	0.0860633	0.168279		0.43651
	0.54563	0.259985	0.520021		0.54563	0.216593	0.222688		0.54563	0.484256	0.0639576		0.54563	0.30806	0.122782		0.54563	0.341627	0.281342		0.54563	0.188979	0.10995		0.54563	0.252609	0.286101		0.54563	0.369547	0.410713		0.54563	0.347021	0.502967		0.54563	0.0924518	0.231807		0.54563	0.312919	0.557701		0.54563	0.0850989	0.17255		0.54563
	0.65476	0.300952	0.488567		0.65476	0.289605	0.328066		0.65476	0.544382	0.136279		0.65476	0.249394	0.122119		0.65476	0.268091	0.252404		0.65476	0.187039	0.107621		0.65476	0.240432	0.256706		0.65476	0.37125	0.374309		0.65476	0.39694	0.483588		0.65476	0.132282	0.271058		0.65476	0.379423	0.673036		0.65476	0.140212	0.182529		0.65476
	0.76389	0.281948	0.488932		0.76389	0.319419	0.311865		0.76389	0.664478	0.128692		0.76389	0.237294	0.174462		0.76389	0.300652	0.267393		0.76389	0.211005	0.154827		0.76389	0.24498	0.303439		0.76389	0.461789	0.392858		0.76389	0.455423	0.458632		0.76389	0.112393	0.285679		0.76389	0.440062	0.495434		0.76389	0.117499	0.227483		0.76389
	0.87302	0.296689	0.489527		0.87302	0.338386	0.286874		0.87302	0.715028	0.20716		0.87302	0.228931	0.174533		0.87302	0.377322	0.253804		0.87302	0.220021	0.159895		0.87302	0.265444	0.334407		0.87302	0.501773	0.377234		0.87302	0.508153	0.483418		0.87302	0.102749	0.294702		0.87302	0.514609	0.440114		0.87302	0.167818	0.302608		0.87302
	0.98214	0.302878	0.500629		0.98214	0.383478	0.247971		0.98214	0.684703	0.244156		0.98214	0.252266	0.186273		0.98214	0.449832	0.183945		0.98214	0.280498	0.171808		0.98214	0.334616	0.379325		0.98214	0.471629	0.374104		0.98214	0.543202	0.458446		0.98214	0.157319	0.331792		0.98214	0.597535	0.487298		0.98214	0.250013	0.394183		0.98214
	1.09127	0.261163	0.538854		1.09127	0.389935	0.206274		1.09127	0.664889	0.245265		1.09127	0.277288	0.212732		1.09127	0.50519	0.222624		1.09127	0.382014	0.237014		1.09127	0.381135	0.364549		1.09127	0.465398	0.378555		1.09127	0.569776	0.458647		1.09127	0.240784	0.340252		1.09127	0.696551	0.445483		1.09127	0.301059	0.441851		1.09127
	1.2004	0.34376	0.562353		1.2004	0.422978	0.196214		1.2004	0.66589	0.263698		1.2004	0.301066	0.211101		1.2004	0.527135	0.290269		1.2004	0.513819	0.294236		1.2004	0.401668	0.354623		1.2004	0.428358	0.41994		1.2004	0.557345	0.479509		1.2004	0.279358	0.364726		1.2004	0.744063	0.436196		1.2004	0.389348	0.478591		1.2004
	1.30952	0.397634	0.605846		1.30952	0.394248	0.204123		1.30952	0.589808	0.293975		1.30952	0.280085	0.177002		1.30952	0.51924	0.37239		1.30952	0.596636	0.330638		1.30952	0.413844	0.374309		1.30952	0.399078	0.401009		1.30952	0.548832	0.498883		1.30952	0.258194	0.401044		1.30952	0.716339	0.520992		1.30952	0.490148	0.438441		1.30952
	1.41865	0.393666	0.505622		1.41865	0.367299	0.261505		1.41865	0.681134	0.31706		1.41865	0.364788	0.256655		1.41865	0.569841	0.322911		1.41865	0.589267	0.339507		1.41865	0.416214	0.409559		1.41865	0.413738	0.395387		1.41865	0.588626	0.535227		1.41865	0.319958	0.412711		1.41865	0.55639	0.547059		1.41865	0.524791	0.394004		1.41865
	1.52778	0.399222	0.401499		1.52778	0.445447	0.254576		1.52778	0.754156	0.319537		1.52778	0.479007	0.279215		1.52778	0.546541	0.424086		1.52778	0.672037	0.423904		1.52778	0.477591	0.3923		1.52778	0.424874	0.507897		1.52778	0.565639	0.611653		1.52778	0.327986	0.408269		1.52778	0.422834	0.52191		1.52778	0.497716	0.437433		1.52778
	1.6369	0.379074	0.41057		1.6369	0.394206	0.269546		1.6369	0.73608	0.337884		1.6369	0.50786	0.34434		1.6369	0.67242	0.43404		1.6369	0.641268	0.452508		1.6369	0.509216	0.369566		1.6369	0.442416	0.543379		1.6369	0.587522	0.618212		1.6369	0.310904	0.406849		1.6369	0.310591	0.494136		1.6369	0.467476	0.416378		1.6369
	1.74603	0.338081	0.404282		1.74603	0.461074	0.268575		1.74603	0.692922	0.385005		1.74603	0.521141	0.345763		1.74603	0.627202	0.453729		1.74603	0.542272	0.542805		1.74603	0.409603	0.329042		1.74603	0.502664	0.516558		1.74603	0.58217	0.604029		1.74603	0.275206	0.408419		1.74603	0.26595	0.406396		1.74603	0.369626	0.437224		1.74603
	1.85516	0.437052	0.420764		1.85516	0.46329	0.294093		1.85516	0.613499	0.321659		1.85516	0.553826	0.384247		1.85516	0.564752	0.491839		1.85516	0.552312	0.503353		1.85516	0.458799	0.351538		1.85516	0.443716	0.512155		1.85516	0.521956	0.576338		1.85516	0.275394	0.410821		1.85516	0.349835	0.413336		1.85516	0.312437	0.438126		1.85516
	1.96429	0.486892	0.371973		1.96429	0.454379	0.304027		1.96429	0.557281	0.331175		1.96429	0.547488	0.388014		1.96429	0.568659	0.468526		1.96429	0.536656	0.487436		1.96429	0.447182	0.404246		1.96429	0.430277	0.587249		1.96429	0.511979	0.567775		1.96429	0.248105	0.406912		1.96429	0.30541	0.453261		1.96429	0.318839	0.454526		1.96429
	2.07341	0.41939	0.355632		2.07341	0.445923	0.33647		2.07341	0.561966	0.310351		2.07341	0.52761	0.37207		2.07341	0.638292	0.485651		2.07341	0.527694	0.423971		2.07341	0.503327	0.371402		2.07341	0.496928	0.518306		2.07341	0.533746	0.487691		2.07341	0.31636	0.465105		2.07341	0.376147	0.49812		2.07341	0.430303	0.438414		2.07341
	2.18254	0.34342	0.377427		2.18254	0.463534	0.349851		2.18254	0.53392	0.35147		2.18254	0.574988	0.32901		2.18254	0.582231	0.548936		2.18254	0.51993	0.395755		2.18254	0.553167	0.319233		2.18254	0.453022	0.458333		2.18254	0.479416	0.445981		2.18254	0.507933	0.509333		2.18254	0.49104	0.551343		2.18254	0.610718	0.48328		2.18254
	2.29167	0.306457	0.27352		2.29167	0.392906	0.407702		2.29167	0.518495	0.321693		2.29167	0.530291	0.395923		2.29167	0.462916	0.437447		2.29167	0.48435	0.419931		2.29167	0.41025	0.472829		2.29167	0.580693	0.473379		2.29167	0.475023	0.487781		2.29167	0.447055	0.514601		2.29167	0.54822	0.665498		2.29167	0.754952	0.536944		2.29167
	2.40079	0.251131	0.255088		2.40079	0.477407	0.377297		2.40079	0.536164	0.375469		2.40079	0.48316	0.416293		2.40079	0.417058	0.428992		2.40079	0.38454	0.410094		2.40079	0.465588	0.490472		2.40079	0.604735	0.490689		2.40079	0.485924	0.494402		2.40079	0.448514	0.581291		2.40079	0.513482	0.595094		2.40079	0.806753	0.585237		2.40079
	2.50992	0.253361	0.322199		2.50992	0.493544	0.357968		2.50992	0.607589	0.466448		2.50992	0.463272	0.326029		2.50992	0.482817	0.40499		2.50992	0.33249	0.37294		2.50992	0.439149	0.624994		2.50992	0.568425	0.658059		2.50992	0.537445	0.489447		2.50992	0.513133	0.602326		2.50992	0.561244	0.605966		2.50992	0.766512	0.639689		2.50992
	2.61905	0.272424	0.285374		2.61905	0.435167	0.257631		2.61905	0.609964	0.449982		2.61905	0.509418	0.341147		2.61905	0.403923	0.333402		2.61905	0.373408	0.273825		2.61905	0.428351	0.55999		2.61905	0.474253	0.768167		2.61905	0.560274	0.470027		2.61905	0.556848	0.678873		2.61905	0.455131	0.555669		2.61905	0.735831	0.650758		2.61905
	2.72817	0.250588	0.27474		2.72817	0.47979	0.294934		2.72817	0.65907	0.484745		2.72817	0.537097	0.354519		2.72817	0.322768	0.346201		2.72817	0.324646	0.220554		2.72817	0.453085	0.56411		2.72817	0.496482	0.770166		2.72817	0.543949	0.499995		2.72817	0.58849	0.642539		2.72817	0.475747	0.517448		2.72817	0.742603	0.726943		2.72817
	2.8373	0.227843	0.227571		2.8373	0.47118	0.270509		2.8373	0.65068	0.523249		2.8373	0.527624	0.463062		2.8373	0.393181	0.330688		2.8373	0.318487	0.243138		2.8373	0.356094	0.511502		2.8373	0.442594	0.689403		2.8373	0.55882	0.524634		2.8373	0.68174	0.644823		2.8373	0.499947	0.539662		2.8373	0.706366	0.803089		2.8373
	2.94643	0.199388	0.189064		2.94643	0.541257	0.267454		2.94643	0.694128	0.536595		2.94643	0.449399	0.445226		2.94643	0.440501	0.303054		2.94643	0.338191	0.214006		2.94643	0.326116	0.350815		2.94643	0.327723	0.61164		2.94643	0.51126	0.537541		2.94643	0.719828	0.67505		2.94643	0.542818	0.586826		2.94643	0.660953	0.827345		2.94643
	3.05556	0.2435	0.207763		3.05556	0.557981	0.33527		3.05556	0.72711	0.499386		3.05556	0.490194	0.45881		3.05556	0.436708	0.297426		3.05556	0.338058	0.176712		3.05556	0.359485	0.330464		3.05556	0.318851	0.513863		3.05556	0.500403	0.4164		3.05556	0.749876	0.597455		3.05556	0.597831	0.747547		3.05556	0.5798	0.807153		3.05556
	3.16468	0.174594	0.247156		3.16468	0.637597	0.274649		3.16468	0.765317	0.52258		3.16468	0.613264	0.427306		3.16468	0.475574	0.285501		3.16468	0.395821	0.217303		3.16468	0.353987	0.272291		3.16468	0.304024	0.388408		3.16468	0.443206	0.471776		3.16468	0.599257	0.485594		3.16468	0.55303	0.863852		3.16468	0.581896	0.863199		3.16468
	3.27381	0.185654	0.381177		3.27381	0.647095	0.23535		3.27381	0.786487	0.49009		3.27381	0.66965	0.408682		3.27381	0.511677	0.33645		3.27381	0.366072	0.241084		3.27381	0.28915	0.2245		3.27381	0.37254	0.391434		3.27381	0.383802	0.443581		3.27381	0.457859	0.430172		3.27381	0.556711	0.876909		3.27381	0.554032	0.807424		3.27381
	3.38294	0.1703	0.440565		3.38294	0.764981	0.295229		3.38294	0.72534	0.367016		3.38294	0.678316	0.398603		3.38294	0.559183	0.322343		3.38294	0.447312	0.273267		3.38294	0.244555	0.269798		3.38294	0.358309	0.433137		3.38294	0.366896	0.498023		3.38294	0.381787	0.376691		3.38294	0.511931	0.761301		3.38294	0.48448	0.754332		3.38294
	3.49206	0.180278	0.546027		3.49206	0.899739	0.378203		3.49206	0.666539	0.299938		3.49206	0.666094	0.353949		3.49206	0.619966	0.285627		3.49206	0.499549	0.229818		3.49206	0.321471	0.261898		3.49206	0.343185	0.409673		3.49206	0.37039	0.501006		3.49206	0.383523	0.38581		3.49206	0.496059	0.617816		3.49206	0.457342	0.696213		3.49206
	3.60119	0.210633	0.744987		3.60119	0.99717	0.476786		3.60119	0.643578	0.327104		3.60119	0.62379	0.297174		3.60119	0.607642	0.258236		3.60119	0.594373	0.217541		3.60119	0.292219	0.261882		3.60119	0.329717	0.49383		3.60119	0.38047	0.537755		3.60119	0.291526	0.265187		3.60119	0.412985	0.625719		3.60119	0.34801	0.651738		3.60119
	3.71032	0.24486	0.934266		3.71032	1	0.544732		3.71032	0.669066	0.355062		3.71032	0.549531	0.341412		3.71032	0.694909	0.327547		3.71032	0.576757	0.254195		3.71032	0.363006	0.183545		3.71032	0.453697	0.544901		3.71032	0.371041	0.527683		3.71032	0.290682	0.287362		3.71032	0.43448	0.568353		3.71032	0.346528	0.618296		3.71032
	3.81944	0.294913	1		3.81944	0.89579	0.497309		3.81944	0.649211	0.187901		3.81944	0.582311	0.331477		3.81944	0.676073	0.346251		3.81944	0.586261	0.284838		3.81944	0.345341	0.228868		3.81944	0.509026	0.689856		3.81944	0.430274	0.492262		3.81944	0.199966	0.282307		3.81944	0.452251	0.602187		3.81944	0.400251	0.600998		3.81944
	3.92857	0.25905	0.802536		3.92857	0.71975	0.488167		3.92857	0.626116	0.111301		3.92857	0.589833	0.453643		3.92857	0.664089	0.369851		3.92857	0.575265	0.348861		3.92857	0.363964	0.260442		3.92857	0.449897	0.706734		3.92857	0.500433	0.53961		3.92857	0.217738	0.369259		3.92857	0.439101	0.62495		3.92857	0.356851	0.6045		3.92857
	4.0377	0.289408	0.559667		4.0377	0.568233	0.543141		4.0377	0.630689	0.160691		4.0377	0.576049	0.528991		4.0377	0.638343	0.436259		4.0377	0.495909	0.31391		4.0377	0.390696	0.279314		4.0377	0.506523	0.738675		4.0377	0.510334	0.526099		4.0377	0.294263	0.383368		4.0377	0.493164	0.665313		4.0377	0.322934	0.551721		4.0377
	4.14683	0.283558	0.300546		4.14683	0.460424	0.502027		4.14683	0.636077	0.115608		4.14683	0.55148	0.669211		4.14683	0.668062	0.536554		4.14683	0.539838	0.310643		4.14683	0.366775	0.271576		4.14683	0.472285	0.55601		4.14683	0.545999	0.554398		4.14683	0.315552	0.378173		4.14683	0.515675	0.663127		4.14683	0.411049	0.482718		4.14683
	4.25595	0.19739	0.128069		4.25595	0.466931	0.485596		4.25595	0.607862	0.0912604		4.25595	0.513566	0.566381		4.25595	0.568994	0.577246		4.25595	0.529195	0.304936		4.25595	0.415765	0.3041		4.25595	0.41953	0.454974		4.25595	0.533334	0.486239		4.25595	0.357526	0.387688		4.25595	0.541971	0.70423		4.25595	0.522806	0.423337		4.25595
	4.36508	0.168701	0.0458452		4.36508	0.519864	0.543562		4.36508	0.555276	0.096016		4.36508	0.523488	0.391844		4.36508	0.53	0.650261		4.36508	0.497649	0.47396		4.36508	0.505166	0.227463		4.36508	0.449925	0.42746		4.36508	0.458999	0.476116		4.36508	0.431665	0.404321		4.36508	0.561578	0.758818		4.36508	0.591059	0.405549		4.36508
	4.47421	0.117033	0.00944347		4.47421	0.405136	0.429792		4.47421	0.503675	0.112836		4.47421	0.507491	0.333284		4.47421	0.52811	0.552004		4.47421	0.454885	0.735708		4.47421	0.563519	0.194709		4.47421	0.447884	0.448068		4.47421	0.465082	0.508114		4.47421	0.426796	0.427107		4.47421	0.477184	0.621935		4.47421	0.557554	0.449631		4.47421
	4.58333	0.107717	0.00200239		4.58333	0.359646	0.390089		4.58333	0.445733	0.0744696		4.58333	0.407251	0.259987		4.58333	0.556489	0.303028		4.58333	0.35573	0.881925		4.58333	0.546377	0.244113		4.58333	0.369279	0.416757		4.58333	0.493775	0.444594		4.58333	0.414654	0.454202		4.58333	0.413206	0.557152		4.58333	0.547651	0.578175		4.58333
	4.69246	0.0341325	0.00480024		4.69246	0.412153	0.348324						4.69246	0.398011	0.297963		4.69246	0.519975	0.239925		4.69246	0.291123	0.982893		4.69246	0.574838	0.259867		4.69246	0.48811	0.324095		4.69246	0.477354	0.421501		4.69246	0.344124	0.494113		4.69246	0.423563	0.525712		4.69246	0.660436	0.564805		4.69246
	4.80159	0	0.03388										4.80159	0.295879	0.182303		4.80159	0.648852	0.277648		4.80159	0.336191	0.843856		4.80159	0.583539	0.311502		4.80159	0.445485	0.333075		4.80159	0.554413	0.459592		4.80159	0.366072	0.582223		4.80159	0.386621	0.51522		4.80159	0.624821	0.708559		4.80159
	4.91071	0.0275735	0.0562702										4.91071	0.375323	0.0870145		4.91071	0.511528	0.240877		4.91071	0.322647	0.638646		4.91071	0.447993	0.319748		4.91071	0.433353	0.390424		4.91071	0.526297	0.602788		4.91071	0.243696	0.735393		4.91071	0.287957	0.462529		4.91071	0.490141	0.751398		4.91071
																	5.01984	0.460404	0.200976		5.01984	0.22255	0.587749		5.01984	0.416543	0.354672		5.01984	0.395347	0.483219		5.01984	0.486373	0.663095		5.01984	0.225641	0.67172		5.01984	0.221115	0.427937		5.01984	0.397924	0.699459		5.01984
																	5.12897	0.434134	0.216955		5.12897	0.211193	0.559808										5.12897	0.42988	0.732518										5.12897	0.401069	0.644312		5.12897
																	5.2381	0.3968	0.172817		5.2381	0.177748	0.512542																						5.2381	0.422433	0.565441		5.2381
																																													5.34722	0.373428	0.47614		5.34722
																																													5.45635	0.301905	0.401511		5.45635
[truncated: 5 more columns]

## Sheet: 7
endosome 7
max		336.746	288.685			372.658	282.09			363.16	346.491			334.092	309.442			344.304	314.464			347.317	294.706			350.067	301.745			341.844	303.969			342.208	324.604			364.517	315.428			401.993	309.517			354.787	299.452
min		297.02	244.036			301.116	248.546			293.754	258.038			301.721	252.694			299.478	246.813			302.196	247.865			302.213	246.612			297.692	253.314			294.987	249.794			288.17	245.466			307.996	258.103			323.948	263.454
	t67				t68				t69				t70				t71				t72				t73				t74				t75				t76				t77				t78				t79
		Rab5	Rab11			Rab5	Rab11			Rab5	Rab11			Rab5	Rab11			Rab5	Rab11			Rab5	Rab11			Rab5	Rab11			Rab5	Rab11			Rab5	Rab11			Rab5	Rab11			Rab5	Rab11			Rab5	Rab11
	0	298.042	264.383		0	310.266	266.805		0	304.697	268.23		0	326.08	260.068		0	311.46	262.945		0	313.5	257.136		0	317.136	279.073		0	326.883	269.181		0	308.522	259.02		0	288.17	251.756		0	307.996	267.351		0	323.948	269.765		0
	0.10913	309.735	260.011		0.10913	308.797	265.333		0.10913	298.966	267.336		0.10913	306.585	262.732		0.10913	316.151	261.021		0.10913	315.239	261.592		0.10913	313.55	268.368		0.10913	309.733	271.442		0.10913	305.326	258.379		0.10913	294.605	249.311		0.10913	308.036	294.604		0.10913	325.944	274.855		0.10913
	0.21825	298.81	250.373		0.21825	308.406	260.186		0.21825	303.904	262.403		0.21825	311.786	263.315		0.21825	315.186	269.577		0.21825	323.525	280.156		0.21825	307.434	259.05		0.21825	309.016	267.702		0.21825	302.362	253.735		0.21825	302.656	245.466		0.21825	316.595	302.453		0.21825	328.901	274.37		0.21825
	0.32738	302.893	248.43		0.32738	307.14	262.94		0.32738	306.438	258.038		0.32738	322.275	270.422		0.32738	315.762	271.295		0.32738	320.005	286.415		0.32738	310.104	255.607		0.32738	298.22	259.14		0.32738	295.953	249.794		0.32738	299.438	247.1		0.32738	318.824	298.484		0.32738	331.834	282.397		0.32738
	0.43651	297.02	247.309		0.43651	304.216	254.689		0.43651	299.813	266.99		0.43651	320.179	263.719		0.43651	312.911	274.916		0.43651	327.033	282.998		0.43651	309.349	248.501		0.43651	298.921	261.254		0.43651	295.231	250.713		0.43651	294.683	251.304		0.43651	322.804	275.582		0.43651	328.473	291.947		0.43651
	0.54563	304.864	244.036		0.54563	307.372	248.546		0.54563	307.872	264.619		0.54563	321.012	264.289		0.54563	324.567	288.997		0.54563	344.334	290.767		0.54563	311.61	246.612		0.54563	297.692	254.253		0.54563	302.654	255.641		0.54563	297.953	253.472		0.54563	313.076	266.686		0.54563	330.131	288.96		0.54563
	0.65476	306.693	250.226		0.65476	301.116	253.219		0.65476	310.546	265.742		0.65476	331.439	269.019		0.65476	325.993	295.943		0.65476	347.317	294.706		0.65476	303.137	254.713		0.65476	308.728	255.494		0.65476	306.018	254.263		0.65476	306.666	248.62		0.65476	317.084	264.34		0.65476	339.159	278.076		0.65476
	0.76389	304.739	256.782		0.76389	311.408	250.582		0.76389	313.524	270.44		0.76389	328.343	271.984		0.76389	330.376	299.726		0.76389	340.462	294.618		0.76389	302.213	253.837		0.76389	305.197	253.314		0.76389	315.182	252.487		0.76389	303	254.245		0.76389	335.652	259.018		0.76389	331.772	272.749		0.76389
	0.87302	297.029	249.763		0.87302	307.996	259.046		0.87302	309.486	262.681		0.87302	324.414	266.989		0.87302	325.727	292.749		0.87302	328.262	294.082		0.87302	313.421	251.965		0.87302	313.492	263.613		0.87302	313.151	261.075		0.87302	310.618	254.241		0.87302	342.896	258.103		0.87302	326.137	271.938		0.87302
	0.98214	311.445	255.759		0.98214	302.49	257.41		0.98214	309.829	272.312		0.98214	324.95	268.184		0.98214	320.798	288.654		0.98214	322.545	277.352		0.98214	326.254	247.973		0.98214	323.018	256.907		0.98214	317.392	265.14		0.98214	314.546	258.347		0.98214	359.46	263.485		0.98214	340.406	263.454		0.98214
	1.09127	308.776	264.559		1.09127	306.543	258.646		1.09127	311.849	271.175		1.09127	324.348	273.367		1.09127	321.415	285.694		1.09127	321.474	277.024		1.09127	338.523	248.215		1.09127	336.082	257.183		1.09127	310.066	263.001		1.09127	346.185	260.666		1.09127	376.193	265.68		1.09127	349.598	269.628		1.09127
	1.2004	308.149	272.418		1.2004	318.899	263.437		1.2004	315.057	266.838		1.2004	323.452	271.893		1.2004	322.55	278.529		1.2004	322.306	266.382		1.2004	350.067	252.663		1.2004	341.844	261.587		1.2004	307.425	269.288		1.2004	360.405	264.382		1.2004	384.01	261.375		1.2004	347.235	267.252		1.2004
	1.30952	314.2	262.381		1.30952	316.738	263.911		1.30952	316.83	266.826		1.30952	320.029	269.325		1.30952	331.601	272.454		1.30952	321.493	262.926		1.30952	343.6	260.453		1.30952	340.416	265.378		1.30952	311.566	264.129		1.30952	360.386	264.405		1.30952	401.993	268.439		1.30952	337.129	273.112		1.30952
	1.41865	313.143	254.583		1.41865	313.571	261.605		1.41865	316.671	263.403		1.41865	316.756	273.964		1.41865	327.93	274.813		1.41865	322.516	265.892		1.41865	334.743	262.062		1.41865	332.057	274.046		1.41865	313.075	266.077		1.41865	364.517	270.302		1.41865	395.065	273.386		1.41865	334.549	263.723		1.41865
	1.52778	304.422	257.839		1.52778	309.786	268.116		1.52778	322.986	270.277		1.52778	317.656	281.615		1.52778	318.663	279.778		1.52778	325.125	268.959		1.52778	331.876	257.262		1.52778	325.403	278.808		1.52778	314.171	270.533		1.52778	357.593	273.894		1.52778	375.136	272.182		1.52778	336.161	265.812		1.52778
	1.6369	305.253	256.681		1.6369	315.225	279.091		1.6369	320.98	277.937		1.6369	324.256	295.505		1.6369	328.129	278.874		1.6369	323.848	270.376		1.6369	329.203	265.575		1.6369	318.451	262.755		1.6369	316.09	276.493		1.6369	344.805	269.326		1.6369	355.597	263.847		1.6369	339.547	278.38		1.6369
	1.74603	303.856	254.243		1.74603	330.272	278.471		1.74603	333.529	264.04		1.74603	327.569	301.557		1.74603	330.158	282.889		1.74603	317.427	269.82		1.74603	327.139	265.5		1.74603	313.125	263.836		1.74603	304.102	287.439		1.74603	333.68	271.191		1.74603	351.229	271.327		1.74603	335.421	273.275		1.74603
	1.85516	311.636	261.194		1.85516	317.083	282.09		1.85516	348.881	266.62		1.85516	334.092	301.933		1.85516	338.383	301.109		1.85516	324.38	279.667		1.85516	326.914	270.7		1.85516	304.945	271.896		1.85516	305.43	301.392		1.85516	316.098	278.849		1.85516	360.38	270.588		1.85516	335.578	270.625		1.85516
	1.96429	307.436	263.928		1.96429	311.26	278.607		1.96429	323.01	270.335		1.96429	320.169	293.44		1.96429	340.955	313.142		1.96429	322.639	272.43		1.96429	329.373	273.878		1.96429	307.196	284.476		1.96429	301.229	303.756		1.96429	317.232	287.801		1.96429	361.97	265.152		1.96429	341.925	267.609		1.96429
	2.07341	302.76	255.319		2.07341	316.317	275.772		2.07341	318.918	271.966		2.07341	319.062	301.007		2.07341	325.799	310.447		2.07341	317.956	279.873		2.07341	314.373	272.549		2.07341	311.955	285.406		2.07341	303.149	304.277		2.07341	315.211	306.598		2.07341	370.155	275.223		2.07341	330.661	274.293		2.07341
	2.18254	308.364	263.056		2.18254	321.92	277.152		2.18254	341.28	279.236		2.18254	324.518	296.914		2.18254	322.254	314.057		2.18254	314.736	290.031		2.18254	309.601	277.772		2.18254	303.153	279.558		2.18254	304.461	318.961		2.18254	314.331	315.428		2.18254	362.271	282.769		2.18254	345.116	290.616		2.18254
	2.29167	308.763	276.238		2.29167	318.657	276.679		2.29167	331.628	271.698		2.29167	316.166	290.387		2.29167	315.037	311.378		2.29167	307.508	271.052		2.29167	318.646	282.73		2.29167	310.062	290.392		2.29167	308.692	321.645		2.29167	305.264	301.242		2.29167	345.21	292.235		2.29167	329.747	290.826		2.29167
	2.40079	309.741	271.034		2.40079	315.868	276.142		2.40079	320.833	264.335		2.40079	308.109	291.589		2.40079	317.807	314.464		2.40079	302.196	275.038		2.40079	321.679	287.949		2.40079	324.515	291.668		2.40079	304.171	324.331		2.40079	304.215	297.743		2.40079	323.986	302.538		2.40079	326.377	299.452		2.40079
	2.50992	308.473	274.02		2.50992	315.899	267.091		2.50992	327.324	270.228		2.50992	316.715	287.319		2.50992	315.22	305.765		2.50992	315.97	268.463		2.50992	316.449	291.638		2.50992	324.75	298.511		2.50992	312.369	324.604		2.50992	307.701	306.567		2.50992	316.184	309.517		2.50992	336.982	296.249		2.50992
	2.61905	301.893	271.425		2.61905	309.489	265.258		2.61905	308.55	267.216		2.61905	316.201	286.183		2.61905	313.112	288.659		2.61905	312.95	268.005		2.61905	318.838	293.462		2.61905	326.403	297.474		2.61905	305.566	314.118		2.61905	309.401	305.084		2.61905	322.869	308.991		2.61905	331.919	289.163		2.61905
	2.72817	305.631	277.191		2.72817	303.453	265.57		2.72817	308.258	262.82		2.72817	315.112	284.301		2.72817	309.95	276.79		2.72817	323.432	268.932		2.72817	323.239	300.961		2.72817	323.486	302.453		2.72817	294.987	299.714		2.72817	305.96	305.051		2.72817	322.369	301.066		2.72817	335.312	285.93		2.72817
	2.8373	310.617	277.735		2.8373	308.308	265.64		2.8373	318.716	265.546		2.8373	301.721	283.481		2.8373	304.072	278.493		2.8373	307.448	262.731		2.8373	322.598	301.745		2.8373	323.456	303.969		2.8373	304.096	289.838		2.8373	309.736	283.842		2.8373	329.143	308.57		2.8373	349.041	291.633		2.8373
	2.94643	313.594	273.6		2.94643	303.387	267.969		2.94643	310.639	266.234		2.94643	306.397	291.65		2.94643	299.925	275.3		2.94643	307.118	268.228		2.94643	318.419	286.109		2.94643	314.327	292.755		2.94643	314.685	285.463		2.94643	321.933	281.315		2.94643	322.294	305.851		2.94643	346.906	285.563		2.94643
	3.05556	313.926	276.944		3.05556	311.563	278.072		3.05556	312.386	266.484		3.05556	314.63	303.264		3.05556	299.478	284.152		3.05556	317.7	262.569		3.05556	314.716	280.752		3.05556	316.806	301.291		3.05556	324.945	276.249		3.05556	318.693	283.594		3.05556	322.581	294.284		3.05556	343.99	291.262		3.05556
	3.16468	315.57	282.115		3.16468	322.316	273.187		3.16468	316.511	268.64		3.16468	314.555	309.442		3.16468	315.746	287.337		3.16468	311.428	263.517		3.16468	313.937	293.163		3.16468	315.526	294.713		3.16468	324.005	270.836		3.16468	331.861	281.838		3.16468	319.881	281.225		3.16468	349.107	284.937		3.16468
	3.27381	324.923	285.856		3.27381	328.753	263.366		3.27381	327.937	266.362		3.27381	319.87	303.421		3.27381	335.524	297.107		3.27381	308.372	266.988		3.27381	319.424	289.77		3.27381	316.336	288.474		3.27381	337.626	268.853		3.27381	327.345	284.034		3.27381	316.937	284.186		3.27381	354.787	288.959		3.27381
	3.38294	335.427	288.685		3.38294	322.021	269.881		3.38294	341.123	269.072		3.38294	327.842	292.324		3.38294	331.08	288.936		3.38294	309.759	273.121		3.38294	315.975	285.51		3.38294	315.699	288.837		3.38294	335.305	273.408		3.38294	332.648	288.138		3.38294	329.543	282.428		3.38294	351.957	278.378		3.38294
	3.49206	333.805	283.516		3.49206	328.165	265.098		3.49206	356.334	266.501		3.49206	323.996	295.877		3.49206	342.521	280.519		3.49206	317.9	268.948		3.49206	331.423	290.669		3.49206	317.956	285.681		3.49206	338.425	278.059		3.49206	330.953	276.721		3.49206	333.969	280.565		3.49206	348.813	275.192		3.49206
	3.60119	330.601	284.19		3.60119	317.284	277.739		3.60119	359.535	269.724		3.60119	321.126	290.608		3.60119	344.304	283.09		3.60119	329.347	271.111		3.60119	336.709	292.545		3.60119	324.279	287.887		3.60119	339.517	281.503		3.60119	329.467	267.246		3.60119	340.057	273.578		3.60119	339.594	283.775		3.60119
	3.71032	336.746	283.347		3.71032	332.143	269.353		3.71032	345.601	272.254		3.71032	327.226	291.728		3.71032	337.878	286.719		3.71032	321.59	266.458		3.71032	330.371	286.613		3.71032	325.642	288.668		3.71032	335.612	278.294		3.71032	331.243	264.959		3.71032	330.953	274.548		3.71032	343.227	281.983		3.71032
	3.81944	331.952	278.061		3.81944	346.467	275.211		3.81944	343.224	276.848		3.81944	331.556	300.248		3.81944	327.774	285.82		3.81944	328.285	273.031		3.81944	335.655	280.388		3.81944	338.956	286.7		3.81944	342.208	287.892		3.81944	333.49	262.409		3.81944	333.602	274.467		3.81944	344.87	270.847		3.81944
	3.92857	321.722	263.4		3.92857	344.421	271.104		3.92857	363.16	271.645		3.92857	324.67	294.868		3.92857	333.004	277.164		3.92857	338.039	274.127		3.92857	330.843	279.166		3.92857	331.771	280.619		3.92857	338.058	284.983		3.92857	319.551	261.421		3.92857	327.88	275.093		3.92857	337.786	273.753		3.92857
	4.0377	324.885	261.126		4.0377	347.463	266.309		4.0377	346.582	272.966		4.0377	315.671	298.112		4.0377	328.423	271.3		4.0377	331.546	262.46		4.0377	330.258	277.749		4.0377	325.136	277.454		4.0377	327.158	266.224		4.0377	313.641	265.714		4.0377	326.44	271.679		4.0377	339.763	276.133		4.0377
	4.14683	326.197	262.503		4.14683	368.19	263.669		4.14683	340.763	273.408		4.14683	312.793	282.412		4.14683	331.654	266.937		4.14683	324.416	267.389		4.14683	334.946	270.534		4.14683	314.747	264.959		4.14683	312.718	259.25		4.14683	314.895	261.896		4.14683	321.685	262.358		4.14683	328.675	278.237		4.14683
	4.25595	327.227	265.409		4.25595	372.658	259.916		4.25595	337.691	273.293		4.25595	313.464	274.493		4.25595	328.64	269.308		4.25595	319.422	268.903		4.25595	331.04	265.389		4.25595	306.025	257.767		4.25595	307.739	260.726		4.25595	316.772	261.173		4.25595	321.726	259.419		4.25595	325.02	271.246		4.25595
	4.36508	324.942	263.757		4.36508	358.392	260.809		4.36508	338.555	282.332		4.36508	314.038	275.024		4.36508	327.154	269.253		4.36508	326.423	273.296		4.36508	329.454	274.409		4.36508	314.447	256.712		4.36508	310.533	262.354		4.36508	318.064	254.533		4.36508	320.289	265.775		4.36508	338.325	269.065		4.36508
	4.47421	313.4	259.697		4.47421	345.702	257.317		4.47421	322.434	301.051		4.47421	311.077	275.345		4.47421	318.069	257.517		4.47421	338.321	272.624		4.47421	326.704	278.368		4.47421	313.222	257.697		4.47421	307.992	267.701		4.47421	320.076	253.263		4.47421	322.225	258.87		4.47421	339.698	277.782		4.47421
	4.58333	314.59	261.81		4.58333	318.021	263.075		4.58333	336.408	336.97		4.58333	324.196	266.967		4.58333	324.117	254.085		4.58333	335.978	268.299		4.58333	336.272	276.084		4.58333	315.75	260.507		4.58333	327.046	267.099		4.58333	314.282	261.97		4.58333	333.93	270.3		4.58333	342.204	278.542		4.58333
	4.69246	324.967	270.22		4.69246	315.211	258.492		4.69246	340.994	346.491		4.69246	328.942	264.178		4.69246	315.915	253.847		4.69246	339.588	259.641		4.69246	348.981	275.345		4.69246	328.044	262.982		4.69246	334.528	264.916		4.69246	315.668	274.389		4.69246	334.297	268.784		4.69246	347.635	278.79		4.69246
	4.80159	316.862	280.266		4.80159	318.832	254.285		4.80159	326.803	334.59		4.80159	320.97	259.273		4.80159	329.078	246.813		4.80159	329.243	249.78		4.80159	342.882	270.458		4.80159	327.314	256.445		4.80159	339.083	261.957		4.80159	326.705	277.038		4.80159	326.081	264.654		4.80159	332.837	271.444		4.80159
	4.91071	306.101	277.83		4.91071	315.991	258.927		4.91071	310.395	323.388		4.91071	312.401	252.694		4.91071	326.779	253.771		4.91071	327.397	247.865		4.91071	335.435	264.273		4.91071	331.065	257.559		4.91071	338.002	260.178		4.91071	320.309	276.577		4.91071	326.037	265.316		4.91071	329.648	271.642		4.91071
									5.01984	305.13	317.049		5.01984	315.417	253.114		5.01984	324.763	253.628		5.01984	308.784	253.154		5.01984	326.119	261.881		5.01984	314.846	258.637		5.01984	321.891	258.672		5.01984	315.82	271.762		5.01984	324.33	258.626		5.01984	338.605	283.264		5.01984
									5.12897	306.023	301.138		5.12897	314.752	258.917		5.12897	319.598	258.763		5.12897	306.356	252.097		5.12897	320.123	276.257		5.12897	316.5	255.009		5.12897	319.332	257.67		5.12897	315.068	268.782		5.12897	312.225	259.091		5.12897	336.085	286.471		5.12897
									5.2381	293.754	285.053		5.2381	303.298	264.08		5.2381	310.157	256.907		5.2381	318.471	254.065		5.2381	315.458	275.008		5.2381	319.358	261.772		5.2381	312.862	260.767		5.2381	299.459	257.384		5.2381	319.225	261.165		5.2381	329.634	276.307		5.2381
																	5.34722	313.279	254.421																														5.34722
line profiles normalised for individual min-max
max		336.746	288.685			372.658	282.09			363.16	346.491			334.092	309.442			344.304	314.464			347.317	294.706			350.067	301.745			341.844	303.969			342.208	324.604			364.517	315.428			401.993	309.517			354.787	299.452
min		297.02	244.036			301.116	248.546			293.754	258.038			301.721	252.694			299.478	246.813			302.196	247.865			302.213	246.612			297.692	253.314			294.987	249.794			288.17	245.466			307.996	258.103			323.948	263.454
	t67				t68				t69				t70				t71				t72				t73				t74				t75				t76				t77				t78				t79
		Rab5	Rab11			Rab5	Rab11			Rab5	Rab11			Rab5	Rab11			Rab5	Rab11			Rab5	Rab11			Rab5	Rab11			Rab5	Rab11			Rab5	Rab11			Rab5	Rab11			Rab5	Rab11			Rab5	Rab11
	0	0.0257384	0.455705		0	0.127899	0.544327		0	0.15767	0.115231		0	0.752509	0.129947		0	0.267301	0.238455		0	0.250527	0.197927		0	0.311846	0.588767		0	0.66113	0.313229		0	0.286632	0.12333		0	0	0.0899134		0	0	0.179861		0	0	0.175315		0
	0.10913	0.320069	0.357778		0.10913	0.107364	0.500449		0.10913	0.0750905	0.105121		0.10913	0.150262	0.176894		0.10913	0.371964	0.210022		0.10913	0.289068	0.293061		0.10913	0.236897	0.394598		0.10913	0.272708	0.357872		0.10913	0.218953	0.114756		0.10913	0.0842828	0.0549586		0.10913	0.000417038	0.709932		0.10913	0.064718	0.316716		0.10913
	0.21825	0.045073	0.14191		0.21825	0.101906	0.347018		0.21825	0.146235	0.0493513		0.21825	0.310918	0.187173		0.21825	0.350427	0.336491		0.21825	0.472702	0.689369		0.21825	0.109099	0.225593		0.21825	0.25646	0.284028		0.21825	0.156189	0.0526815		0.21825	0.189738	0		0.21825	0.091477	0.862602		0.21825	0.160602	0.303254		0.21825
	0.32738	0.147843	0.0984062		0.32738	0.084211	0.429093		0.32738	0.182746	0		0.32738	0.634956	0.312404		0.32738	0.363277	0.361881		0.32738	0.394701	0.82301		0.32738	0.164904	0.163148		0.32738	0.0119451	0.115007		0.32738	0.0204654	0		0.32738	0.147585	0.0233513		0.32738	0.115195	0.785397		0.32738	0.255701	0.526228		0.32738
	0.43651	0	0.0732991		0.43651	0.0433398	0.183123		0.43651	0.0872912	0.101214		0.43651	0.570213	0.194286		0.43651	0.299686	0.415406		0.43651	0.550457	0.750058		0.43651	0.149123	0.0342518		0.43651	0.0278243	0.156748		0.43651	0.00516506	0.0122858		0.43651	0.0853071	0.0834441		0.43651	0.157531	0.339953		0.43651	0.146733	0.791533		0.43651
	0.54563	0.197469	0		0.54563	0.0874455	0		0.54563	0.203413	0.0744006		0.54563	0.595946	0.204327		0.54563	0.559697	0.623558		0.54563	0.933894	0.915917		0.54563	0.196369	0		0.54563	0	0.0185252		0.54563	0.162377	0.0781567		0.54563	0.128136	0.114437		0.54563	0.0540404	0.166937		0.54563	0.200494	0.708541		0.54563
	0.65476	0.243504	0.138618		0.65476	0	0.139304		0.65476	0.241933	0.0870988		0.65476	0.918037	0.287682		0.65476	0.591517	0.726236		0.65476	1	1		0.65476	0.0193151	0.146925		0.65476	0.249957	0.0430261		0.65476	0.233599	0.059734		0.65476	0.242268	0.0450832		0.65476	0.0966783	0.121311		0.65476	0.493232	0.406189		0.65476
	0.76389	0.194313	0.28546		0.76389	0.143856	0.0606892		0.76389	0.284849	0.140209		0.76389	0.822399	0.339934		0.76389	0.689287	0.782154		0.76389	0.84808	0.998123		0.76389	0	0.131044		0.76389	0.169967	0		0.76389	0.427682	0.0359965		0.76389	0.194239	0.125488		0.76389	0.294218	0.0177947		0.76389	0.253697	0.258207		0.76389
	0.87302	0.000224031	0.128255		0.87302	0.0961719	0.313012		0.87302	0.226665	0.0524919		0.87302	0.70104	0.251914		0.87302	0.585586	0.679009		0.87302	0.577686	0.986682		0.87302	0.234205	0.097091		0.87302	0.357839	0.203317		0.87302	0.384659	0.150798		0.87302	0.294025	0.125421		0.87302	0.371287	0		0.87302	0.0709862	0.235677		0.87302
	0.98214	0.363124	0.262557		0.98214	0.0192154	0.264244		0.98214	0.231614	0.161372		0.98214	0.717573	0.272961		0.98214	0.475622	0.618483		0.98214	0.450983	0.629512		0.98214	0.502382	0.0246732		0.98214	0.573591	0.0709264		0.98214	0.474464	0.205133		0.98214	0.345481	0.184115		0.98214	0.547508	0.104668		0.98214	0.533685	0		0.98214
	1.09127	0.295937	0.459643		1.09127	0.0758565	0.301085		1.09127	0.260708	0.148517		1.09127	0.69898	0.36429		1.09127	0.489396	0.574723		1.09127	0.42726	0.622525		1.09127	0.758757	0.029068		1.09127	0.869485	0.0763829		1.09127	0.319334	0.176537		1.09127	0.759896	0.217259		1.09127	0.725521	0.147378		1.09127	0.831736	0.171506		1.09127
	1.2004	0.280162	0.635659		1.2004	0.248567	0.443927		1.2004	0.306936	0.0994962		1.2004	0.671325	0.33832		1.2004	0.514702	0.468824		1.2004	0.445686	0.395317		1.2004	1	0.109751		1.2004	1	0.16331		1.2004	0.263401	0.260585		1.2004	0.946143	0.270369		1.2004	0.808692	0.0636323		1.2004	0.755127	0.105499		1.2004
	1.30952	0.432462	0.410862		1.30952	0.218361	0.458069		1.30952	0.332477	0.0993515		1.30952	0.565554	0.293073		1.30952	0.71663	0.379013		1.30952	0.42767	0.321545		1.30952	0.864863	0.251048		1.30952	0.967648	0.238161		1.30952	0.351089	0.191617		1.30952	0.945899	0.270708		1.30952	1	0.201029		1.30952	0.427422	0.268299		1.30952
	1.41865	0.405863	0.23622		1.41865	0.174097	0.389313		1.41865	0.330194	0.0606533		1.41865	0.464448	0.374819		1.41865	0.634718	0.413888		1.41865	0.450345	0.384862		1.41865	0.679766	0.280229		1.41865	0.778327	0.409268		1.41865	0.383043	0.217661		1.41865	1	0.354994		1.41865	0.926295	0.297257		1.41865	0.343744	0.0074783		1.41865
	1.52778	0.186341	0.309134		1.52778	0.121188	0.58341		1.52778	0.421176	0.138372		1.52778	0.492257	0.509633		1.52778	0.427996	0.487275		1.52778	0.508167	0.450344		1.52778	0.619861	0.193159		1.52778	0.627627	0.503274		1.52778	0.406272	0.277228		1.52778	0.909313	0.406343		1.52778	0.714278	0.273824		1.52778	0.396035	0.0655045		1.52778
	1.6369	0.207241	0.283209		1.6369	0.197221	0.910594		1.6369	0.392271	0.224968		1.6369	0.696138	0.754394		1.6369	0.639166	0.473915		1.6369	0.479861	0.480583		1.6369	0.564001	0.343948		1.6369	0.470162	0.186381		1.6369	0.446896	0.356885		1.6369	0.741818	0.341048		1.6369	0.506414	0.111716		1.6369	0.505837	0.414645		1.6369
	1.74603	0.172098	0.228601		1.74603	0.40754	0.892111		1.74603	0.573073	0.0678638		1.74603	0.798498	0.861052		1.74603	0.684435	0.533269		1.74603	0.337569	0.468726		1.74603	0.520874	0.342589		1.74603	0.349545	0.207722		1.74603	0.193028	0.503204		1.74603	0.596102	0.367705		1.74603	0.459946	0.2572		1.74603	0.372033	0.272816		1.74603
	1.85516	0.367914	0.384274		1.85516	0.223187	1		1.85516	0.794272	0.0970249		1.85516	1	0.867669		1.85516	0.867913	0.80259		1.85516	0.491647	0.678937		1.85516	0.516168	0.436898		1.85516	0.164276	0.366826		1.85516	0.221153	0.689721		1.85516	0.365805	0.477153		1.85516	0.557301	0.242836		1.85516	0.377124	0.199197		1.85516
	1.96429	0.262201	0.445521		1.96429	0.141796	0.896151		1.96429	0.421518	0.139024		1.96429	0.569879	0.718009		1.96429	0.925304	0.98046		1.96429	0.453071	0.524447		1.96429	0.567547	0.494542		1.96429	0.21525	0.615164		1.96429	0.132195	0.721321		1.96429	0.380661	0.605113		1.96429	0.574211	0.137104		1.96429	0.582926	0.115416		1.96429
	2.07341	0.144502	0.252691		2.07341	0.212486	0.811639		2.07341	0.362562	0.157469		2.07341	0.535688	0.851348		2.07341	0.587194	0.940623		2.07341	0.34929	0.683342		2.07341	0.254107	0.470435		2.07341	0.323036	0.633527		2.07341	0.172859	0.728293		2.07341	0.354184	0.873794		2.07341	0.661288	0.332986		2.07341	0.21768	0.301093		2.07341
	2.18254	0.285556	0.425989		2.18254	0.290801	0.852787		2.18254	0.684749	0.239656		2.18254	0.704241	0.779239		2.18254	0.508108	0.993981		2.18254	0.277916	0.900206		2.18254	0.154391	0.56517		2.18254	0.123671	0.518078		2.18254	0.200624	0.924566		2.18254	0.342659	1		2.18254	0.577412	0.47975		2.18254	0.686401	0.754564		2.18254
	2.29167	0.295607	0.721212		2.29167	0.245184	0.838681		2.29167	0.545689	0.15444		2.29167	0.446231	0.664216		2.29167	0.347096	0.954392		2.29167	0.117732	0.495009		2.29167	0.343402	0.655107		2.29167	0.280155	0.731953		2.29167	0.290235	0.960446		2.29167	0.223892	0.797236		2.29167	0.395907	0.663865		2.29167	0.188042	0.760381		2.29167
	2.40079	0.32023	0.604677		2.40079	0.206211	0.822675		2.40079	0.390157	0.0711966		2.40079	0.197335	0.685399		2.40079	0.408886	1		2.40079	0	0.58011		2.40079	0.406783	0.749762		2.40079	0.607499	0.757147		2.40079	0.194487	0.996353		2.40079	0.210155	0.747225		2.40079	0.170109	0.864249		2.40079	0.0787622	1		2.40079
	2.50992	0.288297	0.671542		2.50992	0.206632	0.552856		2.50992	0.483674	0.137813		2.50992	0.463191	0.610146		2.50992	0.351185	0.871421		2.50992	0.305278	0.439751		2.50992	0.297494	0.81667		2.50992	0.61284	0.89224		2.50992	0.368109	1		2.50992	0.255818	0.873341		2.50992	0.0871087	1		2.50992	0.422652	0.911027		2.50992
	2.61905	0.122676	0.613417		2.61905	0.117045	0.498216		2.61905	0.213174	0.10377		2.61905	0.447309	0.59013		2.61905	0.30415	0.618563		2.61905	0.238331	0.429973		2.61905	0.34741	0.849757		2.61905	0.650258	0.87178		2.61905	0.224029	0.859826		2.61905	0.27808	0.852155		2.61905	0.158224	0.989756		2.61905	0.258463	0.714191		2.61905
	2.72817	0.216764	0.742561		2.72817	0.0326677	0.507496		2.72817	0.20897	0.0540634		2.72817	0.413671	0.556971		2.72817	0.233626	0.44311		2.72817	0.470644	0.449753		2.72817	0.439384	0.985771		2.72817	0.584207	0.97007		2.72817	0	0.667286		2.72817	0.233011	0.85168		2.72817	0.15291	0.835629		2.72817	0.368495	0.624382		2.72817
	2.8373	0.342279	0.75474		2.8373	0.100537	0.509586		2.8373	0.359655	0.0848886		2.8373	0	0.542513		2.8373	0.102488	0.468286		2.8373	0.116395	0.317365		2.8373	0.425975	1		2.8373	0.583514	1		2.8373	0.192897	0.535273		2.8373	0.282467	0.548526		2.8373	0.224972	0.981573		2.8373	0.8137	0.782802		2.8373
	2.94643	0.417211	0.662137		2.94643	0.0317507	0.579039		2.94643	0.243271	0.0926655		2.94643	0.144463	0.68647		2.94643	0.00998753	0.421094		2.94643	0.109093	0.434736		2.94643	0.338644	0.716399		2.94643	0.376764	0.778617		2.94643	0.417142	0.476792		2.94643	0.442226	0.512415		2.94643	0.15211	0.928689		2.94643	0.744448	0.614184		2.94643
	3.05556	0.42558	0.737044		3.05556	0.146034	0.880196		3.05556	0.268451	0.0954941		3.05556	0.398775	0.891123		3.05556	0	0.55194		3.05556	0.343621	0.313919		3.05556	0.261281	0.619218		3.05556	0.432902	0.947119		3.05556	0.634428	0.353628		3.05556	0.39979	0.544989		3.05556	0.155167	0.703723		3.05556	0.649888	0.772498		3.05556
	3.16468	0.46695	0.852851		3.16468	0.296328	0.734578		3.16468	0.327877	0.119859		3.16468	0.396464	1		3.16468	0.362922	0.599018		3.16468	0.204613	0.334143		3.16468	0.244998	0.844332		3.16468	0.403916	0.817273		3.16468	0.614526	0.281274		3.16468	0.572267	0.519889		3.16468	0.126441	0.449723		3.16468	0.815824	0.596791		3.16468
	3.27381	0.702387	0.936627		3.27381	0.38631	0.441807		3.27381	0.492505	0.0941081		3.27381	0.560667	0.893887		3.27381	0.804133	0.743433		3.27381	0.136871	0.408265		3.27381	0.359648	0.782788		3.27381	0.422248	0.694107		3.27381	0.902965	0.254769		3.27381	0.513125	0.551269		3.27381	0.0951218	0.507316		3.27381	1	0.708513		3.27381
	3.38294	0.966783	1		3.38294	0.292204	0.63602		3.38294	0.682487	0.124754		3.38294	0.806935	0.698346		3.38294	0.70499	0.622655		3.38294	0.167617	0.539184		3.38294	0.287578	0.705531		3.38294	0.407828	0.701259		3.38294	0.853807	0.315658		3.38294	0.582582	0.609937		3.38294	0.229224	0.473123		3.38294	0.908248	0.414598		3.38294
	3.49206	0.925962	0.884234		3.49206	0.378093	0.493446		3.49206	0.901661	0.0956863		3.49206	0.688124	0.760955		3.49206	0.960219	0.49824		3.49206	0.348045	0.450096		3.49206	0.61039	0.799109		3.49206	0.458944	0.638968		3.49206	0.919892	0.377829		3.49206	0.560375	0.446742		3.49206	0.276314	0.436886		3.49206	0.80629	0.326084		3.49206
	3.60119	0.845301	0.899325		3.60119	0.226004	0.870281		3.60119	0.947775	0.132124		3.60119	0.599446	0.668107		3.60119	1	0.536243		3.60119	0.601733	0.496275		3.60119	0.720852	0.833132		3.60119	0.602152	0.682511		3.60119	0.943021	0.423858		3.60119	0.540914	0.31131		3.60119	0.341079	0.300978		3.60119	0.507364	0.564503		3.60119
	3.71032	1	0.880444		3.71032	0.433697	0.620301		3.71032	0.747009	0.160726		3.71032	0.787896	0.687848		3.71032	0.856654	0.589877		3.71032	0.429813	0.396944		3.71032	0.588407	0.725537		3.71032	0.633043	0.697927		3.71032	0.860323	0.380961		3.71032	0.564183	0.278628		3.71032	0.244228	0.319858		3.71032	0.625159	0.514725		3.71032
	3.81944	0.879328	0.762057		3.81944	0.633913	0.794912		3.81944	0.712767	0.21266		3.81944	0.921658	0.837982		3.81944	0.63124	0.576591		3.81944	0.578192	0.537263		3.81944	0.698833	0.612621		3.81944	0.934585	0.659078		3.81944	1	0.509269		3.81944	0.593611	0.242182		3.81944	0.272414	0.318269		3.81944	0.67842	0.205384		3.81944
	3.92857	0.621806	0.433687		3.92857	0.605313	0.672488		3.92857	1	0.153837		3.92857	0.708933	0.743182		3.92857	0.747916	0.448646		3.92857	0.794378	0.56067		3.92857	0.598285	0.590456		3.92857	0.771843	0.539031		3.92857	0.912128	0.470377		3.92857	0.411038	0.22805		3.92857	0.211536	0.330454		3.92857	0.44873	0.286092		3.92857
	4.0377	0.701422	0.382756		4.0377	0.64784	0.529532		4.0377	0.761139	0.16877		4.0377	0.430949	0.800339		4.0377	0.645716	0.361966		4.0377	0.650466	0.311592		4.0377	0.586045	0.564765		4.0377	0.621569	0.476554		4.0377	0.681293	0.21962		4.0377	0.333622	0.289411		4.0377	0.196216	0.264056		4.0377	0.512831	0.352216		4.0377
	4.14683	0.734466	0.413608		4.14683	0.937547	0.450849		4.14683	0.677306	0.173772		4.14683	0.342029	0.523677		4.14683	0.717802	0.29747		4.14683	0.492445	0.416805		4.14683	0.684015	0.433891		4.14683	0.386277	0.229881		4.14683	0.375495	0.126403		4.14683	0.350049	0.234838		4.14683	0.145629	0.0827594		4.14683	0.153286	0.410656		4.14683
	4.25595	0.76037	0.478691		4.25595	1	0.338963		4.25595	0.63304	0.172463		4.25595	0.362755	0.384139		4.25595	0.650577	0.332513		4.25595	0.381774	0.449146		4.25595	0.602393	0.34057		4.25595	0.18873	0.0878941		4.25595	0.270053	0.146128		4.25595	0.374639	0.224511		4.25595	0.146071	0.0256		4.25595	0.0347586	0.216448		4.25595
	4.36508	0.70285	0.441691		4.36508	0.800596	0.365593		4.36508	0.645494	0.274663		4.36508	0.380487	0.393503		4.36508	0.617413	0.331708		4.36508	0.536941	0.542929		4.36508	0.569248	0.50417		4.36508	0.379485	0.0670848		4.36508	0.329228	0.167889		4.36508	0.39156	0.129605		4.36508	0.130781	0.14921		4.36508	0.466192	0.15588		4.36508
	4.47421	0.41233	0.350759		4.47421	0.623218	0.261493		4.47421	0.413222	0.486287		4.47421	0.289013	0.399158		4.47421	0.414751	0.158228		4.47421	0.800615	0.52858		4.47421	0.511794	0.575986		4.47421	0.351737	0.086524		4.47421	0.275407	0.239366		4.47421	0.417912	0.111441		4.47421	0.151379	0.0149084		4.47421	0.51073	0.398017		4.47421
	4.58333	0.442292	0.398089		4.58333	0.2363	0.433121		4.58333	0.614558	0.892361		4.58333	0.694281	0.251526		4.58333	0.549658	0.107497		4.58333	0.748697	0.436235		4.58333	0.711726	0.534549		4.58333	0.408992	0.142001		4.58333	0.678906	0.231326		4.58333	0.342021	0.2359		4.58333	0.275901	0.237227		4.58333	0.591986	0.419146		4.58333
	4.69246	0.703504	0.586435		4.69246	0.197022	0.296509		4.69246	0.68063	1		4.69246	0.840894	0.202364		4.69246	0.366681	0.103965		4.69246	0.82871	0.251403		4.69246	0.977308	0.521151		4.69246	0.687434	0.190851		4.69246	0.837371	0.20214		4.69246	0.360176	0.413413		4.69246	0.27981	0.207748		4.69246	0.768085	0.42603		4.69246
	4.80159	0.499463	0.811443		4.80159	0.247633	0.1711		4.80159	0.476173	0.865456		4.80159	0.594636	0.115932		4.80159	0.660333	0		4.80159	0.599432	0.0408878		4.80159	0.849853	0.432516		4.80159	0.670894	0.0618158		4.80159	0.93383	0.162587		4.80159	0.504737	0.451279		4.80159	0.192395	0.12742		4.80159	0.288232	0.221949		4.80159
	4.91071	0.228592	0.75689		4.91071	0.207919	0.309465		4.91071	0.239762	0.738811		4.91071	0.329926	0		4.91071	0.609047	0.102854		4.91071	0.55852	0		4.91071	0.694235	0.320334		4.91071	0.755855	0.0838056		4.91071	0.910923	0.138801		4.91071	0.420956	0.444681		4.91071	0.191927	0.140294		4.91071	0.184841	0.227452		4.91071
									5.01984	0.163899	0.667142		5.01984	0.423099	0.00741339		5.01984	0.564073	0.100729		5.01984	0.146	0.112907		5.01984	0.499563	0.276949		5.01984	0.388508	0.105075		5.01984	0.569752	0.118677		5.01984	0.362166	0.375862		5.01984	0.17377	0.0101606		5.01984	0.475287	0.55031		5.01984
									5.12897	0.176768	0.487265		5.12897	0.402562	0.109659		5.12897	0.448859	0.17664		5.12897	0.0922028	0.0903387		5.12897	0.374271	0.537705		5.12897	0.425976	0.0334536		5.12897	0.515556	0.105281		5.12897	0.352312	0.333269		5.12897	0.0449901	0.0192029		5.12897	0.393561	0.639394		5.12897
									5.2381	0	0.305423		5.2381	0.0487073	0.200641		5.2381	0.238231	0.149202		5.2381	0.360702	0.132367		5.2381	0.276778	0.515045		5.2381	0.490716	0.166964		5.2381	0.378538	0.146685		5.2381	0.147861	0.170343		5.2381	0.119462	0.0595459		5.2381	0.184361	0.357055		5.2381
																	5.34722	0.307896	0.11246																														5.34722
line profiles normalised for overall min-max
max		336.746	288.685			372.658	282.09			363.16	346.491			334.092	309.442			344.304	314.464			347.317	294.706			350.067	301.745			341.844	303.969			342.208	324.604			364.517	315.428			401.993	309.517			354.787	299.452
min		297.02	244.036			301.116	248.546			293.754	258.038			301.721	252.694			299.478	246.813			302.196	247.865			302.213	246.612			297.692	253.314			294.987	249.794			288.17	245.466			307.996	258.103			323.948	263.454
max		408.606	347.477
min		278.015	242.744
max		408.606	347.477			408.606	347.477			408.606	347.477			408.606	347.477			408.606	347.477			408.606	347.477			408.606	347.477			408.606	347.477			408.606	347.477			408.606	347.477			408.606	347.477			408.606	347.477
min		278.015	242.744			278.015	242.744			278.015	242.744			278.015	242.744			278.015	242.744			278.015	242.744			278.015	242.744			278.015	242.744			278.015	242.744			278.015	242.744			278.015	242.744			278.015	242.744
	t67				t68				t69				t70				t71				t72				t73				t74				t75				t76				t77				t78				t79
		Rab5	Rab11			Rab5	Rab11			Rab5	Rab11			Rab5	Rab11			Rab5	Rab11			Rab5	Rab11			Rab5	Rab11			Rab5	Rab11			Rab5	Rab11			Rab5	Rab11			Rab5	Rab11			Rab5	Rab11
	0	0.153355	0.206611		0	0.246959	0.229737		0	0.204318	0.243345		0	0.368059	0.16541		0	0.256101	0.19288		0	0.271724	0.137418		0	0.299568	0.34687		0	0.374201	0.252422		0	0.233604	0.155407		0	0.0777603	0.0860522		0	0.229579	0.234946		0	0.351731	0.257998		0
	0.10913	0.242893	0.164864		0.10913	0.235709	0.215683		0.10913	0.160429	0.234806		0.10913	0.218774	0.190848		0.10913	0.292027	0.174514		0.10913	0.28504	0.179965		0.10913	0.272104	0.244656		0.10913	0.242878	0.274014		0.10913	0.209131	0.149282		0.10913	0.127034	0.0627023		0.10913	0.229879	0.495161		0.10913	0.367014	0.306599		0.10913
	0.21825	0.159237	0.0728376		0.21825	0.232719	0.166541		0.21825	0.19824	0.187705		0.21825	0.258597	0.196418		0.21825	0.284634	0.256205		0.21825	0.348489	0.357208		0.21825	0.225273	0.15569		0.21825	0.237384	0.238298		0.21825	0.186436	0.104943		0.21825	0.188685	0.0259899		0.21825	0.295422	0.570108		0.21825	0.389656	0.301972		0.21825
	0.32738	0.1905	0.0542914		0.32738	0.223025	0.192828		0.32738	0.217645	0.146025		0.32738	0.33892	0.264273		0.32738	0.289045	0.272605		0.32738	0.321538	0.416977		0.32738	0.245723	0.122818		0.32738	0.154716	0.15655		0.32738	0.137359	0.0673131		0.32738	0.164042	0.0415886		0.32738	0.312494	0.532208		0.32738	0.412113	0.378609		0.32738
	0.43651	0.145525	0.043588		0.43651	0.200635	0.114047		0.43651	0.166913	0.231506		0.43651	0.322871	0.200272		0.43651	0.267217	0.307178		0.43651	0.375354	0.384351		0.43651	0.23994	0.0549655		0.43651	0.160084	0.176738		0.43651	0.131827	0.0760887		0.43651	0.127633	0.0817307		0.43651	0.342966	0.313536		0.43651	0.386381	0.469797		0.43651
	0.54563	0.205597	0.01234		0.54563	0.224797	0.0553951		0.54563	0.228629	0.208861		0.54563	0.32925	0.205713		0.54563	0.356467	0.441631		0.54563	0.507837	0.458529		0.54563	0.257253	0.0369349		0.54563	0.150677	0.109885		0.54563	0.188674	0.12314		0.54563	0.152671	0.102434		0.54563	0.268476	0.228601		0.54563	0.399076	0.441272		0.54563
	0.65476	0.219601	0.071434		0.65476	0.176892	0.100012		0.65476	0.249101	0.219585		0.65476	0.40909	0.250878		0.65476	0.36739	0.507954		0.65476	0.530678	0.496134		0.65476	0.192373	0.114278		0.65476	0.235186	0.121735		0.65476	0.214427	0.109981		0.65476	0.219396	0.0561055		0.65476	0.299166	0.206203		0.65476	0.468205	0.337351		0.65476
	0.76389	0.204636	0.134034		0.76389	0.2557	0.0748331		0.76389	0.27191	0.26444		0.76389	0.385383	0.27919		0.76389	0.400949	0.544073		0.76389	0.478187	0.495295		0.76389	0.185295	0.105918		0.76389	0.208142	0.100925		0.76389	0.284607	0.0930251		0.76389	0.191317	0.109816		0.76389	0.44135	0.155387		0.76389	0.41164	0.286488		0.76389
	0.87302	0.145593	0.0670161		0.87302	0.229578	0.155649		0.87302	0.240987	0.190357		0.87302	0.355301	0.231497		0.87302	0.365353	0.477448		0.87302	0.384762	0.490178		0.87302	0.271117	0.0880448		0.87302	0.27166	0.199262		0.87302	0.26905	0.175027		0.87302	0.249654	0.109772		0.87302	0.496823	0.146651		0.87302	0.368494	0.278745		0.87302
	0.98214	0.25599	0.12427		0.98214	0.187419	0.140029		0.98214	0.243617	0.282313		0.98214	0.359399	0.242901		0.98214	0.327608	0.438353		0.98214	0.340984	0.330438		0.98214	0.369388	0.0499231		0.98214	0.344605	0.13523		0.98214	0.301523	0.213838		0.98214	0.279737	0.148979		0.98214	0.623662	0.198033		0.98214	0.477758	0.197741		0.98214
	1.09127	0.235551	0.20829		1.09127	0.218448	0.151829		1.09127	0.25908	0.271457		1.09127	0.35479	0.292387		1.09127	0.332336	0.410087		1.09127	0.332788	0.327313		1.09127	0.463334	0.0522366		1.09127	0.444644	0.137869		1.09127	0.245429	0.193412		1.09127	0.522013	0.171119		1.09127	0.751792	0.219		1.09127	0.548141	0.256689		1.09127
	1.2004	0.230752	0.283327		1.2004	0.313064	0.19758		1.2004	0.283649	0.230055		1.2004	0.347935	0.278315		1.2004	0.341022	0.341683		1.2004	0.339154	0.225698		1.2004	0.551735	0.0947094		1.2004	0.488771	0.179912		1.2004	0.225204	0.253447		1.2004	0.630897	0.206597		1.2004	0.811656	0.177889		1.2004	0.53005	0.234002		1.2004
	1.30952	0.277083	0.187494		1.30952	0.296516	0.202109		1.30952	0.297223	0.229933		1.30952	0.321716	0.253799		1.30952	0.410335	0.283671		1.30952	0.332929	0.192704		1.30952	0.502216	0.16909		1.30952	0.477833	0.216114		1.30952	0.256911	0.204184		1.30952	0.630754	0.206823		1.30952	0.949355	0.245337		1.30952	0.452664	0.289957		1.30952
	1.41865	0.268992	0.113043		1.41865	0.272267	0.180087		1.41865	0.296009	0.19725		1.41865	0.296654	0.298092		1.41865	0.382218	0.306198		1.41865	0.340764	0.221022		1.41865	0.434389	0.184451		1.41865	0.413825	0.298872		1.41865	0.268465	0.222787		1.41865	0.662383	0.263126		1.41865	0.896304	0.292576		1.41865	0.432904	0.200311		1.41865
	1.52778	0.202211	0.144126		1.52778	0.243282	0.242254		1.52778	0.344364	0.262888		1.52778	0.303547	0.37114		1.52778	0.31126	0.353601		1.52778	0.360742	0.250308		1.52778	0.412437	0.138616		1.52778	0.362874	0.344339		1.52778	0.276865	0.265335		1.52778	0.609365	0.297428		1.52778	0.743699	0.281073		1.52778	0.445252	0.220255		1.52778
	1.6369	0.208569	0.133075		1.6369	0.284935	0.347047		1.6369	0.329002	0.336024		1.6369	0.354085	0.503762		1.6369	0.383745	0.344971		1.6369	0.350962	0.263832		1.6369	0.391968	0.217993		1.6369	0.309636	0.191071		1.6369	0.291554	0.322234		1.6369	0.511444	0.25381		1.6369	0.594083	0.201493		1.6369	0.471181	0.340258		1.6369
	1.74603	0.197879	0.109794		1.74603	0.400154	0.341127		1.74603	0.425093	0.20334		1.74603	0.379458	0.561554		1.74603	0.399284	0.38331		1.74603	0.301798	0.258529		1.74603	0.376164	0.217278		1.74603	0.268856	0.201392		1.74603	0.199757	0.426748		1.74603	0.426255	0.271617		1.74603	0.560637	0.272912		1.74603	0.439584	0.29151		1.74603
	1.85516	0.257447	0.176159		1.85516	0.299161	0.375683		1.85516	0.542654	0.227968		1.85516	0.429407	0.565139		1.85516	0.462264	0.557273		1.85516	0.355034	0.352543		1.85516	0.37444	0.266924		1.85516	0.206218	0.278345		1.85516	0.209927	0.559975		1.85516	0.291618	0.344729		1.85516	0.630711	0.265861		1.85516	0.440787	0.266206		1.85516
	1.96429	0.225289	0.20227		1.96429	0.254572	0.342421		1.96429	0.344546	0.263439		1.96429	0.322788	0.484047		1.96429	0.481963	0.672165		1.96429	0.341706	0.283449		1.96429	0.393267	0.297268		1.96429	0.223452	0.398456		1.96429	0.17776	0.582547		1.96429	0.300303	0.430206		1.96429	0.642882	0.213956		1.96429	0.489386	0.23741		1.96429
	2.07341	0.189484	0.120064		2.07341	0.293298	0.315353		2.07341	0.313212	0.279017		2.07341	0.314313	0.556296		2.07341	0.365905	0.646433		2.07341	0.305848	0.354513		2.07341	0.27841	0.284578		2.07341	0.259894	0.407338		2.07341	0.192464	0.587527		2.07341	0.284824	0.609686		2.07341	0.705558	0.310116		2.07341	0.403135	0.301229		2.07341
	2.18254	0.232393	0.193943		2.18254	0.336201	0.328533		2.18254	0.484446	0.348429		2.18254	0.356094	0.517224		2.18254	0.338759	0.680899		2.18254	0.281187	0.451502		2.18254	0.24187	0.334448		2.18254	0.192489	0.3515		2.18254	0.202504	0.727724		2.18254	0.278086	0.693991		2.18254	0.645186	0.382163		2.18254	0.513821	0.45709		2.18254
	2.29167	0.235451	0.319799		2.29167	0.311211	0.324014		2.29167	0.410539	0.276459		2.29167	0.292139	0.4549		2.29167	0.283491	0.655327		2.29167	0.225841	0.270283		2.29167	0.311131	0.381792		2.29167	0.245396	0.454943		2.29167	0.234907	0.753353		2.29167	0.208653	0.558545		2.29167	0.514543	0.472546		2.29167	0.396136	0.459089		2.29167
	2.40079	0.242942	0.270119		2.40079	0.28986	0.318888		2.40079	0.327878	0.206155		2.40079	0.230442	0.466377		2.40079	0.304701	0.684787		2.40079	0.185163	0.308344		2.40079	0.334357	0.431619		2.40079	0.356069	0.467128		2.40079	0.200285	0.779001		2.40079	0.200622	0.525137		2.40079	0.352019	0.570917		2.40079	0.37033	0.541448		2.40079
	2.50992	0.233227	0.298624		2.50992	0.290091	0.232468		2.50992	0.37758	0.262417		2.50992	0.296343	0.425602		2.50992	0.284895	0.601734		2.50992	0.290641	0.24557		2.50992	0.294309	0.46684		2.50992	0.357874	0.532467		2.50992	0.263065	0.781606		2.50992	0.227317	0.609383		2.50992	0.292278	0.637557		2.50992	0.451538	0.510868		2.50992
	2.61905	0.182844	0.273845		2.61905	0.241013	0.214968		2.61905	0.233817	0.233665		2.61905	0.292406	0.414757		2.61905	0.26875	0.438404		2.61905	0.26751	0.241197		2.61905	0.3126	0.484258		2.61905	0.370525	0.522572		2.61905	0.210967	0.681481		2.61905	0.240332	0.595231		2.61905	0.343465	0.632528		2.61905	0.412765	0.443214		2.61905
	2.72817	0.211466	0.3289		2.72817	0.194788	0.21794		2.72817	0.231582	0.191685		2.72817	0.284068	0.39679		2.72817	0.244542	0.325073		2.72817	0.347777	0.250043		2.72817	0.346303	0.555857		2.72817	0.348194	0.570111		2.72817	0.129959	0.543951		2.72817	0.213984	0.594914		2.72817	0.33964	0.556867		2.72817	0.438749	0.412346		2.72817
	2.8373	0.249649	0.334092		2.8373	0.231969	0.218609		2.8373	0.311667	0.217718		2.8373	0.181527	0.388956		2.8373	0.199528	0.341336		2.8373	0.225379	0.190835		2.8373	0.341389	0.563348		2.8373	0.347959	0.584587		2.8373	0.19971	0.449655		2.8373	0.242897	0.392406		2.8373	0.391508	0.628512		2.8373	0.543882	0.466796		2.8373
	2.94643	0.272444	0.294615		2.94643	0.194286	0.240854		2.94643	0.249813	0.224287		2.94643	0.217336	0.466958		2.94643	0.167777	0.310852		2.94643	0.222856	0.243327		2.94643	0.309388	0.414057		2.94643	0.278059	0.477512		2.94643	0.280796	0.407882		2.94643	0.336296	0.368284		2.94643	0.339064	0.60255		2.94643	0.527528	0.408841		2.94643
	3.05556	0.27499	0.326548		3.05556	0.256893	0.337311		3.05556	0.263195	0.226675		3.05556	0.280375	0.577847		3.05556	0.164349	0.39537		3.05556	0.303889	0.189294		3.05556	0.281039	0.362899		3.05556	0.297039	0.55901		3.05556	0.359365	0.319907		3.05556	0.311487	0.390043		3.05556	0.341264	0.492113		3.05556	0.505198	0.463254		3.05556
	3.16468	0.287575	0.375918		3.16468	0.339229	0.290672		3.16468	0.294778	0.247253		3.16468	0.279802	0.636841		3.16468	0.288923	0.42578		3.16468	0.25586	0.198339		3.16468	0.275072	0.481402		3.16468	0.287239	0.496208		3.16468	0.352169	0.268225		3.16468	0.412321	0.373277		3.16468	0.320588	0.367423		3.16468	0.544383	0.402863		3.16468
	3.27381	0.359196	0.411632		3.27381	0.388524	0.196901		3.27381	0.382273	0.225505		3.27381	0.320505	0.579345		3.27381	0.440371	0.519062		3.27381	0.232454	0.231489		3.27381	0.317084	0.449005		3.27381	0.293437	0.436638		3.27381	0.456467	0.249293		3.27381	0.377745	0.394239		3.27381	0.298046	0.395696		3.27381	0.587875	0.441262		3.27381
	3.38294	0.439627	0.438649		3.38294	0.33697	0.259105		3.38294	0.483243	0.251387		3.38294	0.38155	0.473392		3.38294	0.406339	0.441047		3.38294	0.243077	0.29004		3.38294	0.290675	0.408335		3.38294	0.288561	0.440097		3.38294	0.438691	0.292785		3.38294	0.418351	0.433429		3.38294	0.394569	0.37891		3.38294	0.566209	0.340241		3.38294
	3.49206	0.427209	0.389297		3.49206	0.384022	0.21344		3.49206	0.599728	0.226838		3.49206	0.352099	0.507317		3.49206	0.493948	0.360684		3.49206	0.305417	0.250197		3.49206	0.408967	0.457596		3.49206	0.305843	0.409969		3.49206	0.462587	0.337194		3.49206	0.405368	0.324414		3.49206	0.428463	0.361121		3.49206	0.542132	0.309818		3.49206
	3.60119	0.402671	0.39573		3.60119	0.300703	0.334135		3.60119	0.624237	0.257611		3.60119	0.330117	0.457008		3.60119	0.507603	0.385231		3.60119	0.39307	0.27085		3.60119	0.449444	0.475506		3.60119	0.354261	0.431029		3.60119	0.470951	0.370072		3.60119	0.393991	0.233945		3.60119	0.47508	0.294403		3.60119	0.471542	0.391765		3.60119
	3.71032	0.449732	0.387681		3.71032	0.414484	0.25407		3.71032	0.517535	0.281768		3.71032	0.37683	0.467705		3.71032	0.458399	0.419875		3.71032	0.33367	0.226425		3.71032	0.400911	0.418867		3.71032	0.364705	0.438485		3.71032	0.441048	0.339431		3.71032	0.407594	0.212114		3.71032	0.405368	0.303671		3.71032	0.499359	0.374656		3.71032
	3.81944	0.413023	0.337212		3.81944	0.524168	0.309996		3.81944	0.499336	0.325629		3.81944	0.409987	0.549053		3.81944	0.381024	0.411293		3.81944	0.384937	0.289181		3.81944	0.441375	0.359426		3.81944	0.466654	0.419696		3.81944	0.491554	0.43108		3.81944	0.424798	0.187768		3.81944	0.425656	0.302891		3.81944	0.511936	0.268333		3.81944
	3.92857	0.334683	0.197224		3.92857	0.5085	0.270785		3.92857	0.651993	0.275949		3.92857	0.357257	0.497686		3.92857	0.421074	0.328649		3.92857	0.459632	0.29965		3.92857	0.404531	0.347759		3.92857	0.411632	0.361634		3.92857	0.45978	0.4033		3.92857	0.318062	0.178328		3.92857	0.381838	0.308873		3.92857	0.457696	0.296073		3.92857
	4.0377	0.358903	0.175512		4.0377	0.531798	0.224998		4.0377	0.525045	0.288561		4.0377	0.28835	0.528657		4.0377	0.385993	0.27266		4.0377	0.409908	0.188253		4.0377	0.400046	0.334235		4.0377	0.360826	0.331416		4.0377	0.376311	0.224186		4.0377	0.272803	0.219317		4.0377	0.370811	0.276278		4.0377	0.472833	0.3188		4.0377
	4.14683	0.368955	0.188665		4.14683	0.690508	0.199797		4.14683	0.48049	0.292786		4.14683	0.266309	0.37875		4.14683	0.410737	0.231		4.14683	0.35531	0.235308		4.14683	0.435945	0.26534		4.14683	0.281275	0.21211		4.14683	0.265736	0.157602		4.14683	0.282407	0.182862		4.14683	0.3344	0.187278		4.14683	0.387928	0.338887		4.14683
	4.25595	0.376835	0.21641		4.25595	0.724722	0.163961		4.25595	0.456964	0.291681		4.25595	0.271447	0.303142		4.25595	0.387662	0.253635		4.25595	0.317071	0.249772		4.25595	0.406036	0.216216		4.25595	0.214486	0.143436		4.25595	0.227609	0.171691		4.25595	0.296783	0.175964		4.25595	0.334717	0.159218		4.25595	0.359939	0.272136		4.25595
	4.36508	0.359337	0.200637		4.36508	0.615482	0.17249		4.36508	0.463583	0.377995		4.36508	0.275842	0.308216		4.36508	0.376278	0.253115		4.36508	0.370684	0.291715		4.36508	0.393891	0.302336		4.36508	0.278978	0.133372		4.36508	0.249006	0.187235		4.36508	0.306675	0.112566		4.36508	0.323712	0.219899		4.36508	0.461819	0.251318		4.36508
	4.47421	0.270959	0.161872		4.47421	0.518309	0.139148		4.47421	0.340137	0.556724		4.47421	0.253167	0.31128		4.47421	0.306714	0.141059		4.47421	0.461787	0.285298		4.47421	0.372837	0.340141		4.47421	0.269597	0.142774		4.47421	0.229545	0.238291		4.47421	0.322081	0.100433		4.47421	0.338538	0.15397		4.47421	0.472337	0.334542		4.47421
	4.58333	0.280073	0.182049		4.58333	0.306344	0.194118		4.58333	0.447141	0.899679		4.58333	0.353625	0.231287		4.58333	0.353021	0.10829		4.58333	0.443849	0.243998		4.58333	0.4461	0.318329		4.58333	0.288955	0.169606		4.58333	0.375448	0.232548		4.58333	0.277713	0.183572		4.58333	0.428166	0.263107		4.58333	0.491525	0.341804		4.58333
	4.69246	0.359536	0.262342		4.69246	0.284826	0.150363		4.69246	0.482256	0.990587		4.69246	0.389968	0.204649		4.69246	0.290213	0.106009		4.69246	0.471495	0.161334		4.69246	0.54342	0.311275		4.69246	0.383094	0.193232		4.69246	0.432748	0.2117		4.69246	0.288327	0.30215		4.69246	0.43098	0.248636		4.69246	0.53311	0.34417		4.69246
	4.80159	0.297465	0.358265		4.80159	0.312553	0.110196		4.80159	0.373594	0.876957		4.80159	0.328925	0.157817		4.80159	0.391011	0.038854		4.80159	0.392276	0.0671842		4.80159	0.496715	0.264617		4.80159	0.377502	0.130823		4.80159	0.467628	0.183447		4.80159	0.372841	0.327445		4.80159	0.36806	0.209202		4.80159	0.419795	0.274026		4.80159
	4.91071	0.215064	0.335009		4.91071	0.290796	0.154513		4.91071	0.247947	0.769997		4.91071	0.263309	0.0949997		4.91071	0.373407	0.105291		4.91071	0.37814	0.0488977		4.91071	0.439691	0.205563		4.91071	0.406227	0.141459		4.91071	0.459344	0.166458		4.91071	0.323861	0.323038		4.91071	0.367723	0.215522		4.91071	0.39538	0.275918		4.91071
									5.01984	0.207628	0.709468		5.01984	0.286405	0.0990165		5.01984	0.357969	0.103919		5.01984	0.235608	0.0993937		5.01984	0.368355	0.182725		5.01984	0.282029	0.151746		5.01984	0.335978	0.152083		5.01984	0.289491	0.277066		5.01984	0.354654	0.151639		5.01984	0.463967	0.386887		5.01984
									5.12897	0.214468	0.55755		5.12897	0.281314	0.154417		5.12897	0.318421	0.152952		5.12897	0.21702	0.0893004		5.12897	0.322443	0.31999		5.12897	0.294697	0.117105		5.12897	0.316381	0.142515		5.12897	0.28373	0.248614		5.12897	0.261962	0.156078		5.12897	0.444668	0.417505		5.12897
									5.2381	0.12052	0.403974		5.2381	0.1936	0.203715		5.2381	0.246122	0.135229		5.2381	0.309791	0.108097		5.2381	0.286718	0.308061		5.2381	0.316585	0.181679		5.2381	0.266837	0.172089		5.2381	0.164203	0.139779		5.2381	0.315565	0.175882		5.2381	0.395267	0.320463		5.2381
																	5.34722	0.270035	0.111496																														5.34722
[truncated: 35 more columns]

## Sheet: 8
endosome 8
max		349.296	318.077			383.196	339.107			406.731	334.808			409.742	373.958			362.296	318.472			367.87	322.247			356.925	349.664			355.007	322.592			378.815	334.467			366.272	316.229			357.999	347.698			409.661	316.717
min		305.816	265.829			314.256	260.021			333.98	250.663			303.344	260.585			322.27	255.449			330.149	266.886			318.019	269.904			306.538	270.732			303.962	254.8			310.971	259.248			310.129	265.741			292.06	255.168
	t72				t73				t74				t75				t76				t77				t78				t79				t80				t81				t82				t83				t84
		Rab5	Rab11			Rab5	Rab11			Rab5	Rab11			Rab5	Rab11			Rab5	Rab11			Rab5	Rab11			Rab5	Rab11			Rab5	Rab11			Rab5	Rab11			Rab5	Rab11			Rab5	Rab11			Rab5	Rab11
	0	329.341	265.829		0	335.566	272.937		0	359.832	307.928		0	338.033	289.75		0	331.601	310.291		0	351.656	315.093		0	334.365	311.567		0	317.341	289.934		0	324.636	306.848		0	334.623	287.919		0	317.053	306.306		0	292.06	316.717		0
	0.10913	331.384	282.083		0.10913	342.094	270.626		0.10913	342.405	293.088		0.10913	341.77	285.13		0.10913	349.443	295.029		0.10913	343.213	316.423		0.10913	340.397	309.688		0.10913	327.349	289.279		0.10913	315.276	304.16		0.10913	328.242	282.1		0.10913	310.129	302.726		0.10913	310.045	297.234		0.10913
	0.21825	329.619	285.194		0.21825	327.176	276.155		0.21825	357.063	289.101		0.21825	345.122	299.125		0.21825	329.469	318.472		0.21825	337.201	313.481		0.21825	346.375	321.765		0.21825	326.976	290.538		0.21825	317.505	297.279		0.21825	323.758	269.781		0.21825	312.349	304.174		0.21825	314.927	283.14		0.21825
	0.32738	346.502	283.136		0.32738	334.626	273.003		0.32738	353.774	281.35		0.32738	368.712	305.24		0.32738	340.245	310.973		0.32738	350.473	309.791		0.32738	355.147	317.7		0.32738	338.995	307.773		0.32738	330.782	290.738		0.32738	314.574	261.625		0.32738	327.347	310.506		0.32738	315.457	274.16		0.32738
	0.43651	346.551	285.446		0.43651	330.022	279.867		0.43651	369.368	291.365		0.43651	382.91	311.344		0.43651	352.26	316.112		0.43651	356.771	303.793		0.43651	346.493	336.373		0.43651	331.334	308.685		0.43651	331.14	290.849		0.43651	310.971	260.964		0.43651	320.287	312.067		0.43651	309.803	277.165		0.43651
	0.54563	346.507	285.284		0.54563	333.194	270.245		0.54563	369.015	294.107		0.54563	408.312	304.677		0.54563	354.412	306.691		0.54563	356.995	308.475		0.54563	347.695	349.664		0.54563	329.94	322.592		0.54563	334.661	291.911		0.54563	322.726	261.632		0.54563	328.968	311.796		0.54563	304.202	265.331		0.54563
	0.65476	341.195	290.559		0.65476	330.863	265.014		0.65476	361.092	292.778		0.65476	409.742	294.385		0.65476	356.671	294.697		0.65476	349.96	305.711		0.65476	340.554	328.014		0.65476	328.462	318.553		0.65476	332.858	286.867		0.65476	337.686	270.768		0.65476	348.166	310.066		0.65476	301.764	263.15		0.65476
	0.76389	333.813	282.561		0.76389	330.719	266.253		0.76389	363.512	280.302		0.76389	397.365	290.992		0.76389	348.191	292.964		0.76389	341.512	306.939		0.76389	338.703	304.515		0.76389	337.906	312.396		0.76389	333.273	279.705		0.76389	328.929	272.997		0.76389	345.938	303.963		0.76389	310.177	270.725		0.76389
	0.87302	332.598	287.742		0.87302	331.597	269.289		0.87302	360.731	277.563		0.87302	375.123	289.103		0.87302	333.089	287.37		0.87302	342.416	310.582		0.87302	342.803	298.609		0.87302	336.243	305.174		0.87302	347.206	270.861		0.87302	328.745	264.508		0.87302	342.611	275.605		0.87302	307.664	255.168		0.87302
	0.98214	328.523	295.257		0.98214	332.468	266.312		0.98214	355.864	270.866		0.98214	370.124	272.773		0.98214	335.895	290.328		0.98214	340.059	317.83		0.98214	349.206	305.427		0.98214	341.298	301.511		0.98214	353.964	268.33		0.98214	337.486	264.263		0.98214	347.555	270.473		0.98214	316.736	257.147		0.98214
	1.09127	331.33	304.032		1.09127	343.185	260.021		1.09127	356.015	267.048		1.09127	349.238	260.585		1.09127	338.522	288.815		1.09127	341.438	322.247		1.09127	342.793	290.719		1.09127	338.67	298.376		1.09127	370.317	269.554		1.09127	335.443	270.39		1.09127	335.993	274.663		1.09127	315.003	268.615		1.09127
	1.2004	323.92	307.372		1.2004	354.243	265.657		1.2004	354.719	267.489		1.2004	358.179	262.697		1.2004	341.518	294.252		1.2004	349.351	310.387		1.2004	338.051	301.553		1.2004	345.75	288.979		1.2004	378.815	268.865		1.2004	334.054	266.966		1.2004	335.761	282.283		1.2004	315.77	273.007		1.2004
	1.30952	326.836	303.029		1.30952	340.65	267.69		1.30952	361.248	265.252		1.30952	351.149	269.501		1.30952	334.36	281.119		1.30952	349.112	291.899		1.30952	350.595	298.187		1.30952	348.47	285.034		1.30952	373.067	263.856		1.30952	336.981	270.62		1.30952	340.075	285.324		1.30952	323.667	279.861		1.30952
	1.41865	323.6	301.342		1.41865	342.931	277.085		1.41865	361.974	269.783		1.41865	341.329	267.425		1.41865	332.792	275.058		1.41865	346.544	297.279		1.41865	349.945	297.808		1.41865	342.069	278.495		1.41865	369.834	259.478		1.41865	351.404	281.347		1.41865	353.312	288.333		1.41865	333.91	284.501		1.41865
	1.52778	318.943	311.143		1.52778	333.65	271.692		1.52778	349.508	264.519		1.52778	336.851	272.413		1.52778	340.634	276.922		1.52778	333.247	292.99		1.52778	350.522	290.919		1.52778	336.441	282.993		1.52778	344.784	261.169		1.52778	359.629	285.707		1.52778	348.247	286.671		1.52778	347.83	278.792		1.52778
	1.6369	315.932	315.915		1.6369	326.179	272.448		1.6369	345.339	254.14		1.6369	325.499	272.812		1.6369	335.233	266.116		1.6369	341.923	285.046		1.6369	343.977	283.603		1.6369	337.669	285.005		1.6369	333.246	260.194		1.6369	342.419	268.729		1.6369	334.612	277.901		1.6369	369.768	286.948		1.6369
	1.74603	321.367	311.685		1.74603	321.242	267.995		1.74603	339.804	254.597		1.74603	318.171	275.672		1.74603	325.747	266.346		1.74603	340.896	274.938		1.74603	337.786	280.651		1.74603	345.359	277.853		1.74603	326.097	254.881		1.74603	341.684	259.248		1.74603	337.536	265.741		1.74603	400.098	293.234		1.74603
	1.85516	317.325	304.368		1.85516	317.064	268.737		1.85516	340.041	259.14		1.85516	314.48	271.809		1.85516	342.501	267.524		1.85516	331.585	277.769		1.85516	343.444	286.007		1.85516	338.745	279.859		1.85516	331.812	254.8		1.85516	348.897	264.301		1.85516	331.755	271.75		1.85516	409.661	296.373		1.85516
	1.96429	316.459	292.772		1.96429	314.738	267.718		1.96429	337.664	260.882		1.96429	319.019	272.549		1.96429	338.456	263.546		1.96429	330.149	273.475		1.96429	332.679	277.702		1.96429	336.673	281.124		1.96429	322.456	260.898		1.96429	349.135	267.284		1.96429	333.536	284.028		1.96429	390.276	304.023		1.96429
	2.07341	323.945	285.121		2.07341	314.256	262.283		2.07341	337.351	250.663		2.07341	303.344	278.663		2.07341	330.284	265.632		2.07341	342.847	274.459		2.07341	333.854	279.767		2.07341	338.696	281.332		2.07341	319.339	266.138		2.07341	335.424	269.504		2.07341	318.774	283.87		2.07341	371.661	302.176		2.07341
	2.18254	315.566	286.822		2.18254	316.757	262.138		2.18254	333.98	259.147		2.18254	309.59	295.282		2.18254	335.431	255.449		2.18254	343.553	269.07		2.18254	319.794	269.904		2.18254	334.613	282.146		2.18254	313.968	262.125		2.18254	326.5	272.133		2.18254	322.407	292.339		2.18254	344.277	288.896		2.18254
	2.29167	325.065	288.787		2.29167	326.154	266.722		2.29167	341.644	254.032		2.29167	322.852	318.976		2.29167	327.625	256.054		2.29167	339.153	275.824		2.29167	318.019	284.786		2.29167	326.4	279.347		2.29167	303.962	263.384		2.29167	324.989	274.305		2.29167	315.963	289.305		2.29167	346.023	284.14		2.29167
	2.40079	325.862	292.969		2.40079	335.519	281.211		2.40079	337.384	259.513		2.40079	316.832	350.292		2.40079	337.663	265.031		2.40079	349.251	269.576		2.40079	318.243	277.238		2.40079	319.58	272.612		2.40079	304.342	266.017		2.40079	320.1	280.476		2.40079	315.741	295.523		2.40079	353.059	262.495		2.40079
	2.50992	341.872	299.287		2.50992	341.502	287.933		2.50992	360.6	276.158		2.50992	319.745	373.958		2.50992	351.989	271.242		2.50992	350.569	272.456		2.50992	331.75	287.928		2.50992	306.569	270.732		2.50992	308.507	276.1		2.50992	320.179	293.965		2.50992	318.173	309.214		2.50992	345.576	276.988		2.50992
	2.61905	349.296	307.839		2.61905	334.519	300.153		2.61905	359.751	285.07		2.61905	332.745	370.195		2.61905	353.881	285.949		2.61905	353.524	266.886		2.61905	334.413	282.012		2.61905	306.538	276.631		2.61905	310.182	285.453		2.61905	324.872	304.888		2.61905	335.551	328.296		2.61905	346.281	274.885		2.61905
	2.72817	348.73	300.894		2.72817	333.446	310.657		2.72817	367.426	296.986		2.72817	331.139	326.262		2.72817	352.871	285.372		2.72817	344.462	285.113		2.72817	344.691	285.309		2.72817	325.087	278.981		2.72817	321.308	293.11		2.72817	332.418	306.157		2.72817	331.943	347.698		2.72817	348.356	281.479		2.72817
	2.8373	341.232	293.345		2.8373	337.26	310.447		2.8373	386.007	293.153		2.8373	337.437	296.332		2.8373	357.839	299.456		2.8373	352.175	295.078		2.8373	340.724	292.156		2.8373	329.233	286.303		2.8373	323.646	289.658		2.8373	337.226	316.229		2.8373	333.252	338.216		2.8373	349.132	295.475		2.8373
	2.94643	339.089	298.564		2.94643	338.04	310.101		2.94643	377.996	294.017		2.94643	334.662	285.397		2.94643	356.19	303.57		2.94643	354.647	283.78		2.94643	345.648	287.993		2.94643	341.385	298.4		2.94643	347.966	291.416		2.94643	345.728	314.815		2.94643	338.742	326.457		2.94643	339.841	301.449		2.94643
	3.05556	333.744	295.756		3.05556	336.329	320.709		3.05556	387.905	303.139		3.05556	330.685	283.836		3.05556	362.296	300.737		3.05556	362.496	293.571		3.05556	348.369	290.755		3.05556	347.478	292.166		3.05556	348.635	293.523		3.05556	344.307	307.541		3.05556	342.224	304.004		3.05556	333.565	304.72		3.05556
	3.16468	331.625	299.549		3.16468	346.956	329.353		3.16468	391.146	306.005		3.16468	342.654	276.161		3.16468	348.055	296.024		3.16468	360.267	296.53		3.16468	356.925	296.294		3.16468	341.621	295.793		3.16468	344.8	296.766		3.16468	351.301	294.689		3.16468	339.823	293.693		3.16468	344.536	305.717		3.16468
	3.27381	331.647	316.787		3.27381	364.934	339.107		3.27381	385.436	316.036		3.27381	344.332	275.054		3.27381	336.401	298.454		3.27381	364.949	292.079		3.27381	353.222	293.357		3.27381	355.007	304.893		3.27381	332.955	303.713		3.27381	348.974	291.257		3.27381	342.905	298.868		3.27381	331.041	307.656		3.27381
	3.38294	328.295	318.077		3.38294	381.071	337.623		3.38294	395.44	330.29		3.38294	355.293	286.474		3.38294	329.038	300.365		3.38294	355.953	293.323		3.38294	346.63	290.759		3.38294	354.966	306.316		3.38294	344.412	306.034		3.38294	340.125	295.61		3.38294	340.341	294.316		3.38294	328.417	304.47		3.38294
	3.49206	329.893	309.843		3.49206	383.196	326.571		3.49206	406.731	334.808		3.49206	354.65	286.656		3.49206	326.141	299.929		3.49206	358.621	299.47		3.49206	339.067	305.669		3.49206	354.118	304.395		3.49206	352.525	301.956		3.49206	327.102	289.497		3.49206	337.292	297.584		3.49206	329.678	295.073		3.49206
	3.60119	321.71	303.787		3.60119	363.478	307.087		3.60119	390.747	314.546		3.60119	336.074	294.306		3.60119	322.27	303.534		3.60119	362.818	305.582		3.60119	339.733	312.397		3.60119	349.604	306.86		3.60119	355.721	318.35		3.60119	320.015	285.496		3.60119	332.251	313.777		3.60119	338.853	293.525		3.60119
	3.71032	323.745	300.419		3.71032	364.479	290.907		3.71032	356.813	313.979		3.71032	345.886	289.884		3.71032	324.284	294.387		3.71032	367.87	300.357		3.71032	347.764	300.633		3.71032	339.389	309.917		3.71032	357.129	334.467		3.71032	326.715	285.127		3.71032	339.107	318.242		3.71032	332.28	291.095		3.71032
	3.81944	317.645	290.875		3.81944	344.048	288.14		3.81944	363.219	314.605		3.81944	357.888	298.816		3.81944	334.711	295.422		3.81944	357.291	303.091		3.81944	349.95	296.257		3.81944	339.618	306.287		3.81944	357.906	333.581		3.81944	321.883	279.857		3.81944	344.153	311.065		3.81944	318.159	287.482		3.81944
	3.92857	313.535	285.342		3.92857	341.26	286.827		3.92857	361.167	315.812		3.92857	353.93	296.854		3.92857	330.941	296.774		3.92857	345.873	306.759		3.92857	344.694	292.101		3.92857	329.687	288.559		3.92857	353.864	319.671		3.92857	317.877	281.823		3.92857	357.999	304.133		3.92857	314.427	284.936		3.92857
	4.0377	305.816	285.815		4.0377	332.391	282.665		4.0377	358.156	309.61		4.0377	346.881	292.747		4.0377	330.484	305.191		4.0377	344.586	310.517		4.0377	340.208	290.56		4.0377	334.464	281.972		4.0377	349.346	312.874		4.0377	321.354	280.638		4.0377	345.42	320.116		4.0377	317.407	291.755		4.0377
	4.14683	328.993	275.861		4.14683	337.706	274.691		4.14683	346.073	310.873		4.14683	334.967	286.847		4.14683	331.64	311.581		4.14683	340.021	315.984		4.14683	332.668	296.757		4.14683	331.903	286.19		4.14683	359.142	304.384		4.14683	341.57	279.07		4.14683	335.56	299.693		4.14683	325.402	299.08		4.14683
									4.25595	339.104	311.052		4.25595	331.676	285.658		4.25595	331.504	310.842		4.25595	334.391	314.219		4.25595	328.692	302.075		4.25595	331.931	274.603		4.25595	356.959	303.494		4.25595	350.711	279.266		4.25595	351.684	301.455		4.25595	322.484	300.5		4.25595
									4.36508	341.632	310.087		4.36508	331.396	288.913		4.36508	331.206	309.813		4.36508	343.426	312.861		4.36508	331.198	313.288		4.36508	327.045	285.402		4.36508	356.862	305.873		4.36508	359.933	286.55		4.36508	351.388	299.066		4.36508	317.277	298.163		4.36508
													4.47421	336.4	296.12														4.47421	325.358	289.527		4.47421	356.955	306.36		4.47421	366.272	288.803		4.47421	345.06	295.782		4.47421	311.539	293.842		4.47421
																													4.58333	331.677	300.673		4.58333	333.872	308.329		4.58333	360.859	292.2		4.58333	347.02	295.045		4.58333	302.375	284.23
																													4.69246	324.461	294.19		4.69246	322.978	314.525		4.69246	349.965	302.113		4.69246	330.877	300.072		4.69246	296.75	294.653
																																									4.80159	325.837	302.894		4.80159	305.628	305.664
line profiles normalised for individual min-max
max		349.296	318.077			383.196	339.107			406.731	334.808			409.742	373.958			362.296	318.472			367.87	322.247			356.925	349.664			355.007	322.592			378.815	334.467			366.272	316.229			357.999	347.698			409.661	316.717
min		305.816	265.829			314.256	260.021			333.98	250.663			303.344	260.585			322.27	255.449			330.149	266.886			318.019	269.904			306.538	270.732			303.962	254.8			310.971	259.248			310.129	265.741			292.06	255.168
	t72				t73				t74				t75				t76				t77				t78				t79				t80				t81				t82				t83				t84
		Rab5	Rab11			Rab5	Rab11			Rab5	Rab11			Rab5	Rab11			Rab5	Rab11			Rab5	Rab11			Rab5	Rab11			Rab5	Rab11			Rab5	Rab11			Rab5	Rab11			Rab5	Rab11			Rab5	Rab11
	0	0.541067	0		0	0.309107	0.163312		0	0.355348	0.680546		0	0.326031	0.257248		0	0.233119	0.870196		0	0.570138	0.870774		0	0.420152	0.522355		0	0.222881	0.370257		0	0.276194	0.653318		0	0.427699	0.503169		0	0.144626	0.49495		0	0	1		0
	0.10913	0.588035	0.3111		0.10913	0.403801	0.134094		0.10913	0.115808	0.504186		0.10913	0.361153	0.216498		0.10913	0.67888	0.628021		0.10913	0.34632	0.894795		0.10913	0.575188	0.498796		0.10913	0.429363	0.357635		0.10913	0.151156	0.61958		0.10913	0.312315	0.401038		0.10913	0	0.451267		0.10913	0.152932	0.683467		0.10913
	0.21825	0.547444	0.370629		0.21825	0.187406	0.204007		0.21825	0.317285	0.456802		0.21825	0.392658	0.33994		0.21825	0.179868	1		0.21825	0.186947	0.841649		0.21825	0.728826	0.650212		0.21825	0.421657	0.381902		0.21825	0.180931	0.533211		0.21825	0.231223	0.184841		0.21825	0.0463613	0.468936		0.21825	0.194446	0.454482		0.21825
	0.32738	0.935743	0.331255		0.32738	0.295468	0.164153		0.32738	0.272075	0.364692		0.32738	0.614372	0.393877		0.32738	0.449096	0.881005		0.32738	0.538789	0.77501		0.32738	0.954305	0.599242		0.32738	0.669632	0.714254		0.32738	0.358302	0.451095		0.32738	0.0651628	0.0417052		0.32738	0.359668	0.546195		0.32738	0.198952	0.308579		0.32738
	0.43651	0.936868	0.37546		0.43651	0.228696	0.250938		0.43651	0.486426	0.483718		0.43651	0.747815	0.447717		0.43651	0.74928	0.962558		0.43651	0.705749	0.666667		0.43651	0.731864	0.833363		0.43651	0.511586	0.731834		0.43651	0.363081	0.452488		0.43651	0	0.0301048		0.43651	0.212191	0.565249		0.43651	0.150875	0.357401		0.43651
	0.54563	0.935856	0.372353		0.54563	0.274698	0.129277		0.54563	0.481574	0.516302		0.54563	0.98656	0.388911		0.54563	0.803026	0.813074		0.54563	0.71168	0.751232		0.54563	0.76278	1		0.54563	0.482815	1		0.54563	0.410128	0.465823		0.54563	0.212567	0.0418245		0.54563	0.393535	0.561946		0.54563	0.103247	0.165122		0.54563
	0.65476	0.813688	0.473314		0.65476	0.24089	0.0631375		0.65476	0.372677	0.500506		0.65476	1	0.298131		0.65476	0.85948	0.62275		0.65476	0.525178	0.701305		0.65476	0.579224	0.728561		0.65476	0.452325	0.922114		0.65476	0.386039	0.402505		0.65476	0.483088	0.202162		0.65476	0.794576	0.540833		0.65476	0.0825163	0.129695		0.65476
	0.76389	0.643906	0.320246		0.76389	0.238799	0.0788015		0.76389	0.40594	0.352236		0.76389	0.883673	0.268203		0.76389	0.647615	0.595265		0.76389	0.301231	0.72349		0.76389	0.531652	0.433937		0.76389	0.647158	0.80338		0.76389	0.391575	0.312618		0.76389	0.324742	0.241291		0.76389	0.748041	0.466365		0.76389	0.154055	0.252771		0.76389
	0.87302	0.615974	0.419398		0.87302	0.251534	0.117191		0.87302	0.367706	0.31969		0.87302	0.674627	0.251541		0.87302	0.270295	0.506506		0.87302	0.325194	0.789289		0.87302	0.63703	0.359892		0.87302	0.612864	0.664131		0.87302	0.577721	0.201593		0.87302	0.321413	0.0923011		0.87302	0.678532	0.120361		0.87302	0.132686	0		0.87302
	0.98214	0.522238	0.563231		0.98214	0.264177	0.0795424		0.98214	0.300814	0.2401		0.98214	0.627643	0.107504		0.98214	0.340403	0.553437		0.98214	0.262703	0.92022		0.98214	0.801597	0.445381		0.98214	0.717161	0.593499		0.98214	0.668008	0.169829		0.98214	0.479464	0.0879979		0.98214	0.781826	0.0577337		0.98214	0.209828	0.032163		0.98214
	1.09127	0.5868	0.731181		1.09127	0.419632	0		1.09127	0.30288	0.194728		1.09127	0.431343	0		1.09127	0.406051	0.529435		1.09127	0.299277	1		1.09127	0.636776	0.260973		1.09127	0.662933	0.533054		1.09127	0.886466	0.185196		1.09127	0.442534	0.195539		1.09127	0.540281	0.108858		1.09127	0.195092	0.218484		1.09127
	1.2004	0.416381	0.795113		1.2004	0.580024	0.0712654		1.2004	0.285074	0.199968		1.2004	0.515376	0.0186288		1.2004	0.480893	0.615689		1.2004	0.509055	0.785762		1.2004	0.514894	0.396801		1.2004	0.809003	0.351843		1.2004	1	0.176541		1.2004	0.417412	0.135442		1.2004	0.535447	0.201833		1.2004	0.201614	0.289837		1.2004
	1.30952	0.483436	0.711986		1.30952	0.382854	0.096969		1.30952	0.374823	0.173376		1.30952	0.449304	0.0786431		1.30952	0.302052	0.407312		1.30952	0.502705	0.451813		1.30952	0.837304	0.354603		1.30952	0.865123	0.275783		1.30952	0.923211	0.113667		1.30952	0.470329	0.199572		1.30952	0.625554	0.238944		1.30952	0.268765	0.401193		1.30952
	1.41865	0.409028	0.679708		1.41865	0.415944	0.215762		1.41865	0.384789	0.227225		1.41865	0.357009	0.0603318		1.41865	0.262882	0.311135		1.41865	0.434637	0.549005		1.41865	0.820589	0.34985		1.41865	0.73305	0.149702		1.41865	0.880023	0.0587182		1.41865	0.731137	0.387825		1.41865	0.902076	0.275655		1.41865	0.355864	0.476589		1.41865
	1.52778	0.301911	0.867287		1.52778	0.281312	0.147581		1.52778	0.213446	0.164665		1.52778	0.314921	0.104328		1.52778	0.458798	0.340726		1.52778	0.0821216	0.471534		1.52778	0.835433	0.263483		1.52778	0.616945	0.236417		1.52778	0.545357	0.0799415		1.52778	0.879882	0.464345		1.52778	0.796284	0.255374		1.52778	0.474231	0.383836		1.52778
	1.6369	0.232673	0.958619		1.6369	0.172949	0.157138		1.6369	0.156132	0.0413225		1.6369	0.208228	0.107848		1.6369	0.323874	0.169267		1.6369	0.312129	0.328038		1.6369	0.667211	0.171751		1.6369	0.642285	0.275227		1.6369	0.391223	0.0677006		1.6369	0.568668	0.166386		1.6369	0.511436	0.148366		1.6369	0.660777	0.516345		1.6369
	1.74603	0.357667	0.877669		1.74603	0.101329	0.100822		1.74603	0.0800557	0.0467583		1.74603	0.139354	0.133074		1.74603	0.0868671	0.17291		1.74603	0.284892	0.145454		1.74603	0.508062	0.134749		1.74603	0.800944	0.137309		1.74603	0.295708	0.00101171		1.74603	0.555386	0		1.74603	0.572517	0		1.74603	0.918683	0.618467		1.74603
	1.85516	0.264692	0.737614		1.85516	0.0407325	0.110213		1.85516	0.0833175	0.100748		1.85516	0.104664	0.0990006		1.85516	0.505448	0.191597		1.85516	0.0380664	0.196593		1.85516	0.653503	0.201901		1.85516	0.664468	0.176001		1.85516	0.372066	0		1.85516	0.685802	0.0886753		1.85516	0.451762	0.0733235		1.85516	1	0.669465		1.85516
	1.96429	0.244786	0.515673		1.96429	0.00699158	0.0973306		1.96429	0.050636	0.121454		1.96429	0.147324	0.105528		1.96429	0.40439	0.128486		1.96429	0	0.119029		1.96429	0.376816	0.0977787		1.96429	0.621736	0.20038		1.96429	0.247066	0.0765373		1.96429	0.690115	0.141019		1.96429	0.488961	0.223131		1.96429	0.835163	0.793771		1.96429
	2.07341	0.416946	0.369245		2.07341	0	0.0285979		2.07341	0.0463309	0		2.07341	0	0.159456		2.07341	0.200232	0.161575		2.07341	0.336612	0.136805		2.07341	0.40702	0.123669		2.07341	0.663476	0.204391		2.07341	0.205426	0.142317		2.07341	0.44218	0.17999		2.07341	0.180576	0.221205		2.07341	0.676873	0.763749		2.07341
	2.18254	0.224244	0.401792		2.18254	0.0362793	0.026767		2.18254	0	0.100825		2.18254	0.0587041	0.306043		2.18254	0.328805	0		2.18254	0.355323	0.0394518		2.18254	0.0456257	0		2.18254	0.579233	0.220095		2.18254	0.133672	0.0919427		2.18254	0.280822	0.226123		2.18254	0.256471	0.324534		2.18254	0.444018	0.547986		2.18254
	2.29167	0.442719	0.439397		2.29167	0.172589	0.0847317		2.29167	0.105348	0.0400414		2.29167	0.183349	0.515034		2.29167	0.133792	0.00959802		2.29167	0.238685	0.161452		2.29167	0	0.186593		2.29167	0.409781	0.166115		2.29167	0	0.107743		2.29167	0.253485	0.264241		2.29167	0.12187	0.287523		2.29167	0.458865	0.470727		2.29167
	2.40079	0.461038	0.519453		2.40079	0.308434	0.26794		2.40079	0.0467872	0.105177		2.40079	0.126769	0.791255		2.40079	0.38457	0.152045		2.40079	0.50638	0.0485972		2.40079	0.0057498	0.0919613		2.40079	0.269071	0.0362454		2.40079	0.00508328	0.140794		2.40079	0.16509	0.372539		2.40079	0.117229	0.363387		2.40079	0.518695	0.119051		2.40079
	2.50992	0.829252	0.640376		2.50992	0.395214	0.352936		2.50992	0.365908	0.302994		2.50992	0.154148	1		2.50992	0.742509	0.250596		2.50992	0.541342	0.100619		2.50992	0.352923	0.225978		2.50992	0.000643706	0		2.50992	0.0607241	0.26736		2.50992	0.166505	0.609269		2.50992	0.168031	0.530432		2.50992	0.455064	0.354516		2.50992
	2.61905	1	0.804047		2.61905	0.29392	0.507449		2.61905	0.354235	0.408901		2.61905	0.27633	0.966809		2.61905	0.789764	0.48395		2.61905	0.619683	0		2.61905	0.421373	0.151812		2.61905	0	0.113746		2.61905	0.0830905	0.384765		2.61905	0.251366	0.800956		2.61905	0.53106	0.76326		2.61905	0.461059	0.320359		2.61905
	2.72817	0.986973	0.671133		2.72817	0.278362	0.640265		2.72817	0.459739	0.55051		2.72817	0.261236	0.5793		2.72817	0.76454	0.474793		2.72817	0.379432	0.32924		2.72817	0.685553	0.193141		2.72817	0.382681	0.159056		2.72817	0.23174	0.480873		2.72817	0.387818	0.823227		2.72817	0.455689	1		2.72817	0.478703	0.427495		2.72817
	2.8373	0.81453	0.526636		2.8373	0.333682	0.637611		2.8373	0.715145	0.504966		2.8373	0.320429	0.315304		2.8373	0.888666	0.698274		2.8373	0.58391	0.509248		2.8373	0.583583	0.278988		2.8373	0.468224	0.300243		2.8373	0.262964	0.437545		2.8373	0.474776	1		2.8373	0.48304	0.884303		2.8373	0.485302	0.654877		2.8373
	2.94643	0.765255	0.626527		2.94643	0.344999	0.633235		2.94643	0.60503	0.515235		2.94643	0.294348	0.218853		2.94643	0.84745	0.76354		2.94643	0.649428	0.30517		2.94643	0.710161	0.226791		2.94643	0.718952	0.533519		2.94643	0.58787	0.459613		2.94643	0.628509	0.975172		2.94643	0.597723	0.740832		2.94643	0.406298	0.751944		2.94643
	3.05556	0.642322	0.572793		3.05556	0.320184	0.767365		3.05556	0.741232	0.623636		3.05556	0.256969	0.205084		3.05556	1	0.718601		3.05556	0.857533	0.482018		3.05556	0.780081	0.261431		3.05556	0.844662	0.4133		3.05556	0.596802	0.486054		3.05556	0.602806	0.847521		3.05556	0.670462	0.466863		3.05556	0.352931	0.805082		3.05556
	3.16468	0.593598	0.645379		3.16468	0.474329	0.876672		3.16468	0.785776	0.6577		3.16468	0.369462	0.137387		3.16468	0.644217	0.64382		3.16468	0.79843	0.535471		3.16468	1	0.330873		3.16468	0.723821	0.48324		3.16468	0.545574	0.526766		3.16468	0.729284	0.621966		3.16468	0.620292	0.341052		3.16468	0.446221	0.821292		3.16468
	3.27381	0.594084	0.975308		3.27381	0.735105	1		3.27381	0.7073	0.776904		3.27381	0.385233	0.127623		3.27381	0.353037	0.682374		3.27381	0.92255	0.455075		3.27381	0.904824	0.29405		3.27381	1	0.658715		3.27381	0.387336	0.613969		3.27381	0.687204	0.561743		3.27381	0.684675	0.404202		3.27381	0.331468	0.852787		3.27381
	3.38294	0.516992	1		3.38294	0.969176	0.981234		3.38294	0.844805	0.946303		3.38294	0.488252	0.228352		3.38294	0.16908	0.712697		3.38294	0.684072	0.477544		3.38294	0.735404	0.261477		3.38294	0.999142	0.686157		3.38294	0.540396	0.643096		3.38294	0.527194	0.63814		3.38294	0.631119	0.348655		3.38294	0.309156	0.80102		3.38294
	3.49206	0.553753	0.842398		3.49206	1	0.841492		3.49206	1	1		3.49206	0.482208	0.229958		3.49206	0.0967059	0.705773		3.49206	0.754802	0.588569		3.49206	0.54099	0.448409		3.49206	0.981652	0.649114		3.49206	0.648777	0.591916		3.49206	0.291699	0.530862		3.49206	0.567422	0.388529		3.49206	0.319878	0.64835		3.49206
	3.60119	0.365546	0.7265		3.60119	0.713989	0.595131		3.60119	0.780299	0.759206		3.60119	0.307619	0.297434		3.60119	0	0.762975		3.60119	0.866048	0.698979		3.60119	0.558106	0.532765		3.60119	0.888509	0.696643		3.60119	0.691471	0.797697		3.60119	0.163556	0.460635		3.60119	0.462115	0.586106		3.60119	0.397896	0.623196		3.60119
	3.71032	0.412351	0.662042		3.71032	0.728501	0.390541		3.71032	0.31386	0.752468		3.71032	0.399838	0.25843		3.71032	0.0503029	0.617832		3.71032	1	0.604589		3.71032	0.764554	0.385274		3.71032	0.677767	0.755588		3.71032	0.710281	1		3.71032	0.284701	0.45417		3.71032	0.605345	0.640591		3.71032	0.342004	0.583724		3.71032
	3.81944	0.272063	0.479372		3.81944	0.432139	0.355549		3.81944	0.401916	0.759905		3.81944	0.512641	0.337214		3.81944	0.310827	0.634261		3.81944	0.719537	0.65398		3.81944	0.820736	0.330402		3.81944	0.682494	0.685592		3.81944	0.720662	0.988877		3.81944	0.197318	0.361669		3.81944	0.710748	0.553026		3.81944	0.221928	0.525019		3.81944
	3.92857	0.177544	0.373464		3.92857	0.391704	0.338952		3.92857	0.373707	0.774243		3.92857	0.475441	0.319909		3.92857	0.216634	0.655722		3.92857	0.416838	0.720239		3.92857	0.68563	0.278299		3.92857	0.477595	0.343752		3.92857	0.666669	0.814271		3.92857	0.124888	0.396182		3.92857	1	0.468441		3.92857	0.190194	0.483657		3.92857
	4.0377	0	0.38252		4.0377	0.26305	0.286325		4.0377	0.332313	0.700537		4.0377	0.40919	0.283683		4.0377	0.205222	0.789267		4.0377	0.382711	0.788115		4.0377	0.570335	0.258983		4.0377	0.576152	0.216741		4.0377	0.606301	0.728961		4.0377	0.18776	0.375375		4.0377	0.737212	0.663456		4.0377	0.215534	0.594445		4.0377
	4.14683	0.533049	0.192009		4.14683	0.340149	0.185495		4.14683	0.166232	0.715544		4.14683	0.297214	0.231642		4.14683	0.234093	0.890658		4.14683	0.261688	0.886874		4.14683	0.376539	0.336677		4.14683	0.523317	0.298071		4.14683	0.737183	0.622392		4.14683	0.553325	0.347864		4.14683	0.531236	0.414272		4.14683	0.283518	0.713451		4.14683
									4.25595	0.0704324	0.717674		4.25595	0.266283	0.221155		4.25595	0.23069	0.878937		4.25595	0.112436	0.854987		4.25595	0.274338	0.403355		4.25595	0.523897	0.0746466		4.25595	0.708012	0.611215		4.25595	0.718619	0.3513		4.25595	0.868079	0.435771		4.25595	0.258705	0.736519		4.25595
									4.36508	0.105188	0.706205		4.36508	0.263652	0.249865		4.36508	0.223258	0.862613		4.36508	0.351959	0.83045		4.36508	0.338742	0.543937		4.36508	0.423082	0.282871		4.36508	0.706716	0.641077		4.36508	0.885376	0.479138		4.36508	0.861892	0.406611		4.36508	0.214428	0.698556		4.36508
													4.47421	0.310683	0.313434														4.47421	0.388287	0.362415		4.47421	0.707963	0.647189		4.47421	1	0.518674		4.47421	0.729708	0.366542		4.47421	0.165636	0.628351		4.47421
																													4.58333	0.518648	0.577333		4.58333	0.399587	0.671909		4.58333	0.90212	0.57829		4.58333	0.770652	0.357556		4.58333	0.0877118	0.472178
																													4.69246	0.369768	0.452334		4.69246	0.254052	0.749679		4.69246	0.70512	0.752256		4.69246	0.433429	0.418888		4.69246	0.0398806	0.641531
																																									4.80159	0.328122	0.453319		4.80159	0.115373	0.82042
line profiles normalised for overall min-max
max		349.296	318.077			383.196	339.107			406.731	334.808			409.742	373.958			362.296	318.472			367.87	322.247			356.925	349.664			355.007	322.592			378.815	334.467			366.272	316.229			357.999	347.698			409.661	316.717
min		305.816	265.829			314.256	260.021			333.98	250.663			303.344	260.585			322.27	255.449			330.149	266.886			318.019	269.904			306.538	270.732			303.962	254.8			310.971	259.248			310.129	265.741			292.06	255.168
max		409.742	373.958
min		278.856	242.405
max		409.742	373.958			409.742	373.958			409.742	373.958			409.742	373.958			409.742	373.958			409.742	373.958			409.742	373.958			409.742	373.958			409.742	373.958			409.742	373.958			409.742	373.958			409.742	373.958
min		278.856	242.405			278.856	242.405			278.856	242.405			278.856	242.405			278.856	242.405			278.856	242.405			278.856	242.405			278.856	242.405			278.856	242.405			278.856	242.405			278.856	242.405			278.856	242.405
	t72				t73				t74				t75				t76				t77				t78				t79				t80				t81				t82				t83				t84
		Rab5	Rab11			Rab5	Rab11			Rab5	Rab11			Rab5	Rab11			Rab5	Rab11			Rab5	Rab11			Rab5	Rab11			Rab5	Rab11			Rab5	Rab11			Rab5	Rab11			Rab5	Rab11			Rab5	Rab11
	0	0.385722	0.178057		0	0.433279	0.232086		0	0.618675	0.49807		0	0.452128	0.359893		0	0.402985	0.516038		0	0.556208	0.552537		0	0.424106	0.525734		0	0.294037	0.361289		0	0.349771	0.489864		0	0.426075	0.345978		0	0.291833	0.485741		0	0.100884	0.56488		0
	0.10913	0.401325	0.301615		0.10913	0.483156	0.214521		0.10913	0.485531	0.385264		0.10913	0.480679	0.324774		0.10913	0.5393	0.400019		0.10913	0.491704	0.562645		0.10913	0.47019	0.51145		0.10913	0.370501	0.356313		0.10913	0.278263	0.469433		0.10913	0.377323	0.301741		0.10913	0.238938	0.458526		0.10913	0.238294	0.416785		0.10913
	0.21825	0.387841	0.325258		0.21825	0.369177	0.256551		0.21825	0.597518	0.354956		0.21825	0.506289	0.431157		0.21825	0.3867	0.578224		0.21825	0.445774	0.54028		0.21825	0.515859	0.603254		0.21825	0.367647	0.365879		0.21825	0.295291	0.417128		0.21825	0.343061	0.208097		0.21825	0.255894	0.469534		0.21825	0.275593	0.309651		0.21825
	0.32738	0.516834	0.30962		0.32738	0.426095	0.232591		0.32738	0.572389	0.29604		0.32738	0.686522	0.47764		0.32738	0.469031	0.521217		0.32738	0.547173	0.512237		0.32738	0.582882	0.572351		0.32738	0.459476	0.496898		0.32738	0.396729	0.3674		0.32738	0.272898	0.146099		0.32738	0.370482	0.517667		0.32738	0.279642	0.241388		0.32738
	0.43651	0.517207	0.327176		0.43651	0.390924	0.284764		0.43651	0.691532	0.372172		0.43651	0.794998	0.52404		0.43651	0.560828	0.560287		0.43651	0.59529	0.466643		0.43651	0.516762	0.714298		0.43651	0.400949	0.503828		0.43651	0.399462	0.368244		0.43651	0.245365	0.141075		0.43651	0.316544	0.529537		0.43651	0.236445	0.26423		0.43651
	0.54563	0.516871	0.325942		0.54563	0.415155	0.211625		0.54563	0.688835	0.393014		0.54563	0.989074	0.473361		0.54563	0.577264	0.488673		0.54563	0.596999	0.50223		0.54563	0.525952	0.815331		0.54563	0.390295	0.609544		0.54563	0.426367	0.376319		0.54563	0.335178	0.146151		0.54563	0.382868	0.527479		0.54563	0.193652	0.17427		0.54563
	0.65476	0.476287	0.36604		0.65476	0.397348	0.171864		0.65476	0.628307	0.38291		0.65476	1	0.395126		0.65476	0.594528	0.397494		0.65476	0.54325	0.48122		0.65476	0.47139	0.650757		0.65476	0.379004	0.57884		0.65476	0.412591	0.337975		0.65476	0.449478	0.2156		0.65476	0.529542	0.514326		0.65476	0.175025	0.157695		0.65476
	0.76389	0.419885	0.305247		0.76389	0.396246	0.181281		0.76389	0.646795	0.288072		0.76389	0.905437	0.369334		0.76389	0.529739	0.384326		0.76389	0.47871	0.490556		0.76389	0.457249	0.472126		0.76389	0.451154	0.532033		0.76389	0.415757	0.28354		0.76389	0.382574	0.232548		0.76389	0.512523	0.467932		0.76389	0.239302	0.215277		0.76389
	0.87302	0.410606	0.344627		0.87302	0.402954	0.204359		0.87302	0.625543	0.267255		0.87302	0.735503	0.354975		0.87302	0.414353	0.341804		0.87302	0.485616	0.518246		0.87302	0.488573	0.427232		0.87302	0.438454	0.477138		0.87302	0.522213	0.216304		0.87302	0.381167	0.168014		0.87302	0.487101	0.252373		0.87302	0.220102	0.0970149		0.87302
	0.98214	0.379467	0.401752		0.98214	0.409613	0.181726		0.98214	0.588363	0.216346		0.98214	0.69731	0.230842		0.98214	0.435792	0.364288		0.98214	0.467606	0.573345		0.98214	0.53749	0.479065		0.98214	0.477077	0.449294		0.98214	0.573848	0.197069		0.98214	0.447946	0.166151		0.98214	0.52488	0.213356		0.98214	0.289414	0.112063		0.98214
	1.09127	0.400915	0.468456		1.09127	0.491494	0.133907		1.09127	0.589511	0.187325		1.09127	0.537737	0.138195		1.09127	0.455868	0.352789		1.09127	0.478147	0.606919		1.09127	0.488497	0.367258		1.09127	0.456996	0.425466		1.09127	0.698783	0.206375		1.09127	0.432343	0.212731		1.09127	0.436538	0.245206		1.09127	0.276174	0.199236		1.09127
	1.2004	0.344302	0.493847		1.2004	0.575975	0.17675		1.2004	0.579614	0.190677		1.2004	0.606048	0.15425		1.2004	0.478755	0.394111		1.2004	0.538604	0.516761		1.2004	0.452268	0.44961		1.2004	0.511087	0.354029		1.2004	0.763713	0.201133		1.2004	0.421728	0.1867		1.2004	0.43477	0.30313		1.2004	0.282034	0.23262		1.2004
	1.30952	0.366577	0.460833		1.30952	0.472122	0.192202		1.30952	0.629499	0.173668		1.30952	0.552337	0.20597		1.30952	0.424065	0.294284		1.30952	0.536774	0.376226		1.30952	0.548104	0.424026		1.30952	0.53187	0.324045		1.30952	0.719797	0.163057		1.30952	0.444087	0.214478		1.30952	0.467725	0.326249		1.30952	0.342369	0.284719		1.30952
	1.41865	0.341859	0.448013		1.41865	0.489551	0.263618		1.41865	0.635038	0.208112		1.41865	0.47731	0.19019		1.41865	0.412086	0.248208		1.41865	0.517157	0.417128		1.41865	0.543135	0.421144		1.41865	0.482961	0.274342		1.41865	0.695098	0.129781		1.41865	0.554282	0.296018		1.41865	0.568859	0.34912		1.41865	0.420627	0.319994		1.41865
	1.52778	0.306275	0.522513		1.52778	0.418639	0.222629		1.52778	0.539801	0.168096		1.52778	0.443097	0.228106		1.52778	0.471998	0.262384		1.52778	0.415563	0.384526		1.52778	0.547547	0.36878		1.52778	0.439965	0.308527		1.52778	0.503705	0.142634		1.52778	0.617129	0.329162		1.52778	0.530167	0.336486		1.52778	0.526979	0.276598		1.52778
	1.6369	0.283274	0.558786		1.6369	0.361562	0.228374		1.6369	0.507944	0.0892021		1.6369	0.356366	0.231139		1.6369	0.430738	0.180243		1.6369	0.481851	0.324139		1.6369	0.497544	0.313163		1.6369	0.449349	0.323826		1.6369	0.415556	0.135221		1.6369	0.485636	0.200103		1.6369	0.425988	0.26982		1.6369	0.69459	0.338594		1.6369
	1.74603	0.324797	0.526636		1.74603	0.323838	0.194519		1.74603	0.465659	0.092679		1.74603	0.300378	0.252879		1.74603	0.35826	0.181988		1.74603	0.474001	0.247302		1.74603	0.450237	0.290728		1.74603	0.508103	0.269456		1.74603	0.360931	0.0948348		1.74603	0.480025	0.128035		1.74603	0.448328	0.177388		1.74603	0.926318	0.386374		1.74603
	1.85516	0.293911	0.471011		1.85516	0.291921	0.200164		1.85516	0.467472	0.127213		1.85516	0.272178	0.223514		1.85516	0.486264	0.190941		1.85516	0.402867	0.268822		1.85516	0.493469	0.331443		1.85516	0.457564	0.28471		1.85516	0.4046	0.0942221		1.85516	0.535127	0.166444		1.85516	0.404163	0.223068		1.85516	0.999381	0.410234		1.85516
	1.96429	0.287298	0.382864		1.96429	0.274149	0.19242		1.96429	0.449306	0.140457		1.96429	0.306857	0.22914		1.96429	0.45536	0.160706		1.96429	0.391896	0.236182		1.96429	0.411225	0.268313		1.96429	0.44174	0.29432		1.96429	0.333113	0.140572		1.96429	0.53695	0.189116		1.96429	0.417768	0.316398		1.96429	0.851276	0.468392		1.96429
	2.07341	0.34449	0.324708		2.07341	0.270467	0.1511		2.07341	0.446914	0.0627709		2.07341	0.187097	0.275615		2.07341	0.392928	0.176558		2.07341	0.488906	0.243662		2.07341	0.420203	0.28401		2.07341	0.457196	0.295901		2.07341	0.3093	0.180408		2.07341	0.432193	0.205996		2.07341	0.304981	0.315198		2.07341	0.709053	0.454346		2.07341
	2.18254	0.280474	0.337634		2.18254	0.289576	0.149999		2.18254	0.421161	0.127262		2.18254	0.234817	0.401944		2.18254	0.432246	0.0991517		2.18254	0.494299	0.202693		2.18254	0.312779	0.20903		2.18254	0.426	0.302092		2.18254	0.268264	0.149902		2.18254	0.364017	0.225978		2.18254	0.332739	0.379572		2.18254	0.499833	0.353398		2.18254
	2.29167	0.353051	0.35257		2.29167	0.361372	0.184846		2.29167	0.479717	0.0883826		2.29167	0.336142	0.582054		2.29167	0.37261	0.10375		2.29167	0.460684	0.254034		2.29167	0.299217	0.322161		2.29167	0.363249	0.280812		2.29167	0.191817	0.15947		2.29167	0.352467	0.242489		2.29167	0.283511	0.356514		2.29167	0.513173	0.317252		2.29167
	2.40079	0.359137	0.384365		2.40079	0.432924	0.294985		2.40079	0.447167	0.130046		2.40079	0.290148	0.820103		2.40079	0.449299	0.171992		2.40079	0.537833	0.206542		2.40079	0.300926	0.264786		2.40079	0.311142	0.229615		2.40079	0.194725	0.179485		2.40079	0.315118	0.289397		2.40079	0.281813	0.403777		2.40079	0.56693	0.152715		2.40079
	2.50992	0.481457	0.432392		2.50992	0.478633	0.346083		2.50992	0.624544	0.256576		2.50992	0.312404	1		2.50992	0.558758	0.219205		2.50992	0.547909	0.228434		2.50992	0.404122	0.346041		2.50992	0.211739	0.215327		2.50992	0.226545	0.256133		2.50992	0.315717	0.391934		2.50992	0.300393	0.507846		2.50992	0.509758	0.26288		2.50992
	2.61905	0.53818	0.497396		2.61905	0.425279	0.438972		2.61905	0.618056	0.324317		2.61905	0.411727	0.971396		2.61905	0.573209	0.330999		2.61905	0.570486	0.186091		2.61905	0.424469	0.301073		2.61905	0.211501	0.260167		2.61905	0.239337	0.327232		2.61905	0.351571	0.474961		2.61905	0.433166	0.652897		2.61905	0.515144	0.2469		2.61905
	2.72817	0.533852	0.444607		2.72817	0.417085	0.518818		2.72817	0.676698	0.414894		2.72817	0.399456	0.637439		2.72817	0.565495	0.326612		2.72817	0.501247	0.324644		2.72817	0.502996	0.326132		2.72817	0.353214	0.278029		2.72817	0.324348	0.385433		2.72817	0.409224	0.484608		2.72817	0.4056	0.800386		2.72817	0.530998	0.297025		2.72817
	2.8373	0.476567	0.387218		2.8373	0.446223	0.517222		2.8373	0.81866	0.385763		2.8373	0.447574	0.409926		2.8373	0.603453	0.433675		2.8373	0.560177	0.400397		2.8373	0.472685	0.378181		2.8373	0.384892	0.333688		2.8373	0.342205	0.359194		2.8373	0.445965	0.561175		2.8373	0.415603	0.728307		2.8373	0.536927	0.403409		2.8373
	2.94643	0.460198	0.426891		2.94643	0.452184	0.514591		2.94643	0.757455	0.392332		2.94643	0.426373	0.326804		2.94643	0.590849	0.464943		2.94643	0.579059	0.314515		2.94643	0.51031	0.346533		2.94643	0.47774	0.425649		2.94643	0.528017	0.372559		2.94643	0.51092	0.550422		2.94643	0.457546	0.638925		2.94643	0.465941	0.448823		2.94643
	3.05556	0.419359	0.40555		3.05556	0.439113	0.595226		3.05556	0.833161	0.461669		3.05556	0.395988	0.314938		3.05556	0.637499	0.443414		3.05556	0.639034	0.388938		3.05556	0.531094	0.367536		3.05556	0.524293	0.378257		3.05556	0.533126	0.388571		3.05556	0.50006	0.49513		3.05556	0.48415	0.468242		3.05556	0.417991	0.473684		3.05556
	3.16468	0.403173	0.434379		3.16468	0.520304	0.660939		3.16468	0.85792	0.483457		3.16468	0.487433	0.256596		3.16468	0.5287	0.407588		3.16468	0.622	0.411432		3.16468	0.596465	0.409639		3.16468	0.479543	0.405828		3.16468	0.503829	0.413226		3.16468	0.553499	0.397434		3.16468	0.465801	0.389863		3.16468	0.501812	0.481268		3.16468
	3.27381	0.403334	0.565415		3.27381	0.657659	0.73508		3.27381	0.8143	0.559704		3.27381	0.500254	0.248181		3.27381	0.439656	0.426058		3.27381	0.657771	0.377599		3.27381	0.568174	0.387312		3.27381	0.581817	0.475003		3.27381	0.413333	0.466035		3.27381	0.53572	0.371348		3.27381	0.489348	0.429205		3.27381	0.398708	0.496004		3.27381
	3.38294	0.377725	0.575221		3.38294	0.780948	0.723799		3.38294	0.89073	0.668056		3.38294	0.583998	0.33499		3.38294	0.383401	0.440585		3.38294	0.589043	0.387055		3.38294	0.517814	0.367564		3.38294	0.581499	0.485822		3.38294	0.500867	0.483674		3.38294	0.468113	0.404439		3.38294	0.469761	0.394599		3.38294	0.37866	0.471784		3.38294
	3.49206	0.389937	0.512628		3.49206	0.797184	0.639789		3.49206	0.976991	0.702403		3.49206	0.579085	0.336374		3.49206	0.361269	0.437268		3.49206	0.609427	0.433777		3.49206	0.460025	0.4809		3.49206	0.575022	0.471218		3.49206	0.56285	0.45268		3.49206	0.368613	0.357973		3.49206	0.446464	0.419441		3.49206	0.388294	0.400355		3.49206
	3.60119	0.327414	0.466597		3.60119	0.646537	0.491684		3.60119	0.854875	0.548384		3.60119	0.437161	0.394525		3.60119	0.331696	0.464672		3.60119	0.641488	0.480241		3.60119	0.465112	0.532046		3.60119	0.54053	0.489955		3.60119	0.587267	0.577298		3.60119	0.31447	0.327555		3.60119	0.40795	0.542531		3.60119	0.458393	0.388586		3.60119
	3.71032	0.342963	0.440996		3.71032	0.65418	0.36869		3.71032	0.595614	0.544073		3.71032	0.512127	0.360912		3.71032	0.347079	0.395138		3.71032	0.680092	0.440519		3.71032	0.526479	0.442622		3.71032	0.462489	0.513192		3.71032	0.598024	0.699811		3.71032	0.365656	0.324754		3.71032	0.460334	0.576475		3.71032	0.408174	0.370119		3.71032
	3.81944	0.296359	0.368446		3.81944	0.498082	0.347654		3.81944	0.644558	0.548831		3.81944	0.603824	0.428808		3.81944	0.426748	0.403009		3.81944	0.599264	0.461304		3.81944	0.543179	0.409353		3.81944	0.464239	0.485599		3.81944	0.60396	0.693075		3.81944	0.328735	0.284688		3.81944	0.498884	0.521922		3.81944	0.300286	0.342653		3.81944
	3.92857	0.26496	0.326383		3.92857	0.476784	0.337676		3.92857	0.628879	0.558002		3.92857	0.573584	0.413894		3.92857	0.397944	0.41329		3.92857	0.512027	0.489188		3.92857	0.503019	0.377763		3.92857	0.388362	0.35084		3.92857	0.573082	0.587335		3.92857	0.298133	0.299637		3.92857	0.604673	0.469226		3.92857	0.271773	0.323301		3.92857
	4.0377	0.20598	0.32998		4.0377	0.40902	0.306038		4.0377	0.605871	0.510856		4.0377	0.519729	0.382675		4.0377	0.394454	0.477268		4.0377	0.502192	0.517752		4.0377	0.468748	0.366052		4.0377	0.424859	0.30077		4.0377	0.538558	0.535672		4.0377	0.324697	0.290625		4.0377	0.508562	0.59072		4.0377	0.294541	0.375135		4.0377
	4.14683	0.383059	0.254316		4.14683	0.449629	0.245422		4.14683	0.513558	0.520456		4.14683	0.428703	0.337826		4.14683	0.403283	0.525841		4.14683	0.467314	0.559312		4.14683	0.411142	0.413157		4.14683	0.405293	0.332832		4.14683	0.613409	0.471136		4.14683	0.479154	0.278709		4.14683	0.43323	0.435478		4.14683	0.355624	0.430813		4.14683
									4.25595	0.46031	0.521818		4.25595	0.403559	0.328788		4.25595	0.402242	0.520226		4.25595	0.4243	0.545893		4.25595	0.380763	0.453584		4.25595	0.405508	0.244754		4.25595	0.596726	0.464367		4.25595	0.548993	0.280197		4.25595	0.556425	0.448872		4.25595	0.33333	0.441606		4.25595
									4.36508	0.479628	0.514482		4.36508	0.40142	0.353531		4.36508	0.399969	0.512406		4.36508	0.493329	0.535567		4.36508	0.399907	0.538819		4.36508	0.368175	0.326839		4.36508	0.595985	0.482451		4.36508	0.61945	0.335569		4.36508	0.554162	0.430705		4.36508	0.293548	0.423844		4.36508
													4.47421	0.439651	0.408315														4.47421	0.35529	0.358197		4.47421	0.596698	0.486152		4.47421	0.667881	0.352694		4.47421	0.505818	0.405743		4.47421	0.249708	0.390998		4.47421
																													4.58333	0.403564	0.442921		4.58333	0.420339	0.501123		4.58333	0.626525	0.378516		4.58333	0.520793	0.400144		4.58333	0.179693	0.31793
																													4.69246	0.348432	0.393644		4.69246	0.337108	0.548219		4.69246	0.543289	0.453867		4.69246	0.397458	0.438354		4.69246	0.136717	0.397165
																																									4.80159	0.358944	0.459805		4.80159	0.204547	0.48086
[truncated: 26 more columns]

## Sheet: 9
endosome 9
max		355.475	300.992			378.568	340.952			393.452	301.26			380.262	287.564			385.453	278.801			379.771	281.498			363.257	304.887			395.617	296.373			373.373	313.393			367.943	286.159			395.373	299.626			368.014	348.289
min		304.002	241.157			320.201	253.622			328.046	244.791			326.357	243.107			319.636	243.018			322.615	252.591			315.74	247.576			326.951	249.774			321.792	255.453			310.613	240.277			317.653	256.255			316.92	265.379
	t68				t69				t70				t71				t72				t73				t74				t75				t76				t77				t78				t79				t80
		Rab5	Rab11			Rab5	Rab11			Rab5	Rab11			Rab5	Rab11			Rab5	Rab11			Rab5	Rab11			Rab5	Rab11			Rab5	Rab11			Rab5	Rab11			Rab5	Rab11			Rab5	Rab11			Rab5	Rab11
	0	346.815	263.405		0	368.338	264.694		0	352.652	266.643		0	364.002	260.88		0	362.922	257.795		0	354.029	266.123		0	338.732	277.424		0	337.001	262.484		0	360.412	285.835		0	312.314	265.143		0	330.022	269.672		0	357.304	287.786		0
	0.10913	320.736	262.283		0.10913	358.493	253.622		0.10913	352.78	263.643		0.10913	364.911	274.209		0.10913	376.168	263.675		0.10913	341.772	258.754		0.10913	345.996	292.507		0.10913	340.955	255.645		0.10913	364.204	276.137		0.10913	320.91	259.728		0.10913	325.523	280.137		0.10913	363.375	275.872		0.10913
	0.21825	331.282	251.633		0.21825	343.933	267.033		0.21825	361.401	262.97		0.21825	355.849	268.869		0.21825	380.138	257.699		0.21825	349.575	253.873		0.21825	346.084	304.887		0.21825	341.056	260.256		0.21825	373.373	292.198		0.21825	324.28	269.348		0.21825	323.478	274.329		0.21825	368.014	277.657		0.21825
	0.32738	326.227	258.816		0.32738	349.186	267.973		0.32738	356.245	258.664		0.32738	361.299	266.223		0.32738	380.192	268.777		0.32738	354.938	267.765		0.32738	352.405	297.292		0.32738	337.826	266.979		0.32738	364.093	293.038		0.32738	323.621	281.362		0.32738	321.445	274.169		0.32738	361.522	286.172		0.32738
	0.43651	320.762	253.521		0.43651	341.082	259.76		0.43651	359.771	252.648		0.43651	369.516	256.247		0.43651	385.453	271.695		0.43651	370.213	265.868		0.43651	347.966	273.326		0.43651	332.064	273.08		0.43651	347.235	295.217		0.43651	311.06	286.159		0.43651	329.291	279.164		0.43651	340.874	283.79		0.43651
	0.54563	324.66	249.712		0.54563	342.313	263.522		0.54563	345.743	252.04		0.54563	364.381	255.252		0.54563	377.804	270.054		0.54563	376.382	260.571		0.54563	343.246	260.379		0.54563	329.276	271.11		0.54563	337.277	294.304		0.54563	310.613	276.255		0.54563	323.805	283.022		0.54563	321.01	278.234		0.54563
	0.65476	331.675	246.944		0.65476	342.687	255.343		0.65476	340.326	253.501		0.65476	364.012	254.335		0.65476	371.423	264.032		0.65476	379.771	252.591		0.65476	343.973	253.47		0.65476	333.469	269.219		0.65476	326.994	289.186		0.65476	312.644	266.031		0.65476	317.653	285.55		0.65476	322.798	279.342		0.65476
	0.76389	325.709	245.855		0.76389	338.108	256.456		0.76389	340.978	253.178		0.76389	359.141	257.714		0.76389	365.908	255.084		0.76389	366.928	263.378		0.76389	343.894	247.95		0.76389	347.216	271.846		0.76389	327.182	278.692		0.76389	317.254	272.81		0.76389	329.406	282.662		0.76389	325.571	282.173		0.76389
	0.87302	324.636	252.05		0.87302	337.162	261.009		0.87302	341.059	251.167		0.87302	354.9	254.435		0.87302	351.798	251.231		0.87302	357.432	257.507		0.87302	341.65	247.576		0.87302	354.258	269.683		0.87302	328.929	280.876		0.87302	321.097	281.108		0.87302	327.096	289.74		0.87302	326.735	278.96		0.87302
	0.98214	329.172	244.848		0.98214	327.648	257.943		0.98214	329.69	255.499		0.98214	365.568	257.644		0.98214	349.152	243.018		0.98214	350.327	256.566		0.98214	351.318	258.2		0.98214	348.995	255.106		0.98214	321.792	272.444		0.98214	328.562	282.08		0.98214	321.995	284.977		0.98214	329.011	277.226		0.98214
	1.09127	327.49	241.157		1.09127	325.58	254.196		1.09127	331.078	255.994		1.09127	361.324	258.068		1.09127	338.96	245.445		1.09127	365.772	253.393		1.09127	361.764	259.978		1.09127	348.483	252.429		1.09127	336.317	265.77		1.09127	336.267	272.095		1.09127	318.254	273.377		1.09127	322.411	271.637		1.09127
	1.2004	330.015	255.277		1.2004	327.663	274.291		1.2004	346.116	248.936		1.2004	355.419	259.761		1.2004	340.531	249.22		1.2004	358.92	255.449		1.2004	363.257	252.45		1.2004	356.133	253.738		1.2004	325.98	263.088		1.2004	333.946	262.284		1.2004	318.829	274.802		1.2004	316.92	269.065		1.2004
	1.30952	333.664	267.805		1.30952	343.123	309.74		1.30952	341.529	255.945		1.30952	366.357	269.908		1.30952	347.893	247.917		1.30952	357.258	255.016		1.30952	346.543	269.897		1.30952	336.739	257.206		1.30952	336.169	268.652		1.30952	329.483	263.021		1.30952	325.595	284.221		1.30952	320.076	270.974		1.30952
	1.41865	338.679	275.427		1.41865	348.449	336.62		1.41865	338.825	260.561		1.41865	363.028	270.522		1.41865	344.909	261.232		1.41865	348.516	265.325		1.41865	339.029	278.555		1.41865	345.279	264.629		1.41865	336.231	261.06		1.41865	341.868	255.261		1.41865	330.559	289.138		1.41865	325.448	273.727		1.41865
	1.52778	329.669	283.801		1.52778	340.506	339.388		1.52778	346.5	267.461		1.52778	359.671	286.763		1.52778	342.108	260.428		1.52778	351.278	262.074		1.52778	345.092	279.583		1.52778	346.749	263.776		1.52778	336.298	263.447		1.52778	339.282	255.549		1.52778	330.162	283.659		1.52778	324.96	273.841		1.52778
	1.6369	335.401	278.771		1.6369	338.083	340.952		1.6369	361.721	275.673		1.6369	348.435	287.564		1.6369	334.151	270.138		1.6369	351.964	269.072		1.6369	339.978	282.226		1.6369	341.323	258.295		1.6369	335.611	265.839		1.6369	342.804	257.632		1.6369	335.016	295.622		1.6369	328.299	266.045		1.6369
	1.74603	313.124	266.393		1.74603	331.455	335.045		1.74603	357.877	287.464		1.74603	342.888	280.712		1.74603	328.624	275.997		1.74603	347.369	264.201		1.74603	336.85	278.163		1.74603	345.822	263.558		1.74603	325.384	268.213		1.74603	340.172	253.903		1.74603	339.735	299.626		1.74603	328.236	267.847		1.74603
	1.85516	309.995	261.512		1.85516	327.266	332.771		1.85516	355.901	298.799		1.85516	340.698	269.71		1.85516	327.277	272.169		1.85516	335.034	259.652		1.85516	334.641	278.228		1.85516	332.673	255.684		1.85516	323.136	259.958		1.85516	333.778	245.674		1.85516	344.777	292.26		1.85516	333.745	265.379		1.85516
	1.96429	313.313	248.865		1.96429	328.046	328.387		1.96429	360.165	297.948		1.96429	337.399	262.023		1.96429	321.429	260.557		1.96429	326.762	262.164		1.96429	326.329	281.641		1.96429	339.45	255.45		1.96429	326.898	255.453		1.96429	327.437	248.37		1.96429	339.625	283.164		1.96429	342.103	268.71		1.96429
	2.07341	304.002	251.676		2.07341	332.959	316.013		2.07341	355.901	288.655		2.07341	334.98	255.469		2.07341	319.636	251.133		2.07341	324.745	258.893		2.07341	316.923	285.221		2.07341	338.434	254.706		2.07341	322.476	259.363		2.07341	327.65	252.011		2.07341	324.868	265.901		2.07341	338.911	277.3		2.07341
	2.18254	319.173	259.451		2.18254	333.268	289.47		2.18254	350.158	267.166		2.18254	336.901	248.245		2.18254	327.674	246.383		2.18254	338.205	260.246		2.18254	315.74	282.41		2.18254	326.951	249.774		2.18254	324.975	262.492		2.18254	312.384	240.476		2.18254	336.446	258.188		2.18254	334.44	290.024		2.18254
	2.29167	318.375	253.099		2.29167	320.201	284.42		2.29167	347.844	267.297		2.29167	326.357	254.695		2.29167	331.522	253.172		2.29167	335.002	281.266		2.29167	325.254	272.971		2.29167	329.948	258.058		2.29167	345.791	270.248		2.29167	328.966	240.277		2.29167	320.339	262.68		2.29167	346.043	298.583		2.29167
	2.40079	317.902	260.608		2.40079	338.558	286.583		2.40079	338.11	276.6		2.40079	332.954	256.856		2.40079	333.618	254.989		2.40079	334.332	274.006		2.40079	330.46	275.556		2.40079	332.277	256.026		2.40079	341.478	267.443		2.40079	327.684	248.031		2.40079	325.667	261.127		2.40079	348.761	307.275		2.40079
	2.50992	323.832	267.639		2.50992	341.144	293.489		2.50992	339.433	278.595		2.50992	342.585	253.145		2.50992	334.428	254.124		2.50992	329.617	270.182		2.50992	332.474	280.261		2.50992	336.245	254.831		2.50992	341.848	271.31		2.50992	330.656	250.857		2.50992	319.467	266.202		2.50992	345.205	306.389		2.50992
	2.61905	326.643	271.795		2.61905	327.488	279.442		2.61905	328.046	285.457		2.61905	347.445	246.512		2.61905	345.443	258.872		2.61905	333.348	281.498		2.61905	325.21	282.892		2.61905	334.038	263.084		2.61905	342.129	278.92		2.61905	332.562	251.397		2.61905	320.188	256.255		2.61905	352.112	293.931		2.61905
	2.72817	325.358	266.633		2.72817	335.075	277.262		2.72817	338.693	290.724		2.72817	348.311	243.107		2.72817	343.489	266.016		2.72817	327.478	271.481		2.72817	340.962	284.416		2.72817	332.617	279.673		2.72817	338.711	294.177		2.72817	346.99	251.715		2.72817	331.176	262.702		2.72817	341.255	304.493		2.72817
	2.8373	327.241	254.37		2.8373	342.137	270.429		2.8373	338.875	291.864		2.8373	346.958	250.872		2.8373	338.602	265.723		2.8373	322.615	272.56		2.8373	329.122	291.702		2.8373	345.914	289.051		2.8373	337.906	309.529		2.8373	345.939	256.933		2.8373	324.545	257.457		2.8373	341.298	298.053		2.8373
	2.94643	327.02	248.038		2.94643	337.248	264.93		2.94643	337.799	294.993		2.94643	345.228	248.782		2.94643	347.096	266.14		2.94643	330.101	267.409		2.94643	325.027	297.441		2.94643	356.72	289.596		2.94643	344.24	311.158		2.94643	337.235	253.929		2.94643	334.065	268.607		2.94643	338.526	315.687		2.94643
	3.05556	322.499	249.67		3.05556	345.25	265.652		3.05556	342.021	301.26		3.05556	359.136	251.78		3.05556	345.04	267.588		3.05556	334.021	266.947		3.05556	330.481	293.954		3.05556	356.579	296.373		3.05556	352.013	313.393		3.05556	341.392	257.603		3.05556	332.35	271.193		3.05556	332.331	331.769		3.05556
	3.16468	327.305	257.667		3.16468	354.664	273.231		3.16468	357.897	293.633		3.16468	372.849	250.465		3.16468	343.005	270.841		3.16468	331.203	272.379		3.16468	329.674	295.353		3.16468	355.825	287.638		3.16468	356.464	301.184		3.16468	355.958	259.153		3.16468	335.621	281.844		3.16468	331.942	339.938		3.16468
	3.27381	328.073	251.991		3.27381	366.202	276.915		3.27381	378.988	273.34		3.27381	378.586	247.933		3.27381	353.426	267.322		3.27381	330.743	276.205		3.27381	334.532	302.629		3.27381	363.689	273.271		3.27381	362.002	291.839		3.27381	355.52	255.731		3.27381	338.908	285.557		3.27381	332.703	348.289		3.27381
	3.38294	340.601	256.346		3.38294	368.878	267.939		3.38294	393.452	262.442		3.38294	380.262	246.173		3.38294	362.696	273.471		3.38294	346.923	269.125		3.38294	350.155	303.579		3.38294	376.717	268.161		3.38294	350.803	279.991		3.38294	353.201	256.528		3.38294	350.978	285.165		3.38294	337.445	341.781		3.38294
	3.49206	354.227	282.8		3.49206	366.766	275.236		3.49206	386.561	251.091		3.49206	373.709	248.853		3.49206	355.051	278.801		3.49206	356.219	266.067		3.49206	350.933	296.918		3.49206	389.187	266.898		3.49206	349.694	274.279		3.49206	367.943	260.702		3.49206	361.058	283.677		3.49206	336.233	321.468		3.49206
	3.60119	352.422	300.992		3.60119	378.568	290.997		3.60119	376.049	255.183		3.60119	365.565	253.806		3.60119	355.062	276.21		3.60119	345.916	265.888		3.60119	349.946	290.043		3.60119	395.617	272.898		3.60119	352.447	278.401		3.60119	353.921	265.366		3.60119	382.692	279.068		3.60119	325.206	299.797		3.60119
	3.71032	348.821	295.55		3.71032	368.788	299.059		3.71032	362.286	244.791		3.71032	369.901	243.597		3.71032	360.133	272.401		3.71032	348.646	260.209		3.71032	353.291	282.11		3.71032	374.171	265.568		3.71032	349.488	288.529		3.71032	361.143	264.24		3.71032	385.893	282.088		3.71032	323.253	286.196		3.71032
	3.81944	355.475	279.764		3.81944	356.739	295.925		3.81944	363.003	259.623		3.81944	364.133	252.274		3.81944	360.412	271.209		3.81944	354.785	269.983		3.81944	345.577	275.888		3.81944	356.939	273.637		3.81944	354.966	280.257		3.81944	351.162	263.891		3.81944	381.969	279.128		3.81944	332.785	282.909		3.81944
	3.92857	341.049	273.618		3.92857	354.754	285.465		3.92857	356.359	260.69		3.92857	353.719	261.68		3.92857	364.061	261.584		3.92857	358.733	261.014		3.92857	336.963	273.604		3.92857	344.909	265.565		3.92857	352.766	283.527		3.92857	347.377	264.715		3.92857	392.828	281.858		3.92857	332.18	279.756		3.92857
	4.0377	350.421	269.62		4.0377	367.701	268.894		4.0377	367.815	249.452		4.0377	363.873	269.612		4.0377	362.825	256.9		4.0377	356.684	261.781		4.0377	355.638	268.401		4.0377	346.329	258.316		4.0377	351.839	279.143		4.0377	349.933	262.329		4.0377	395.373	273.818		4.0377	329.585	278.793		4.0377
					4.14683	364.443	259.248		4.14683	356.068	260.833		4.14683	365.405	269.735		4.14683	353.569	253.84		4.14683	358.43	268.277		4.14683	354.16	267.579										4.14683	340.793	258.241		4.14683	360.777	267.377		4.14683	336.334	284.416
					4.25595	352.346	256.49		4.25595	364.104	257.844		4.25595	366.132	265.602		4.25595	346.859	251.253		4.25595	334.845	266.35		4.25595	360.365	267.773										4.25595	318.247	261.229		4.25595	345.065	268.979		4.25595	344.166	285.997
line profiles normalised for individual min-max
max		355.475	300.992			378.568	340.952			393.452	301.26			380.262	287.564			385.453	278.801			379.771	281.498			363.257	304.887			395.617	296.373			373.373	313.393			367.943	286.159			395.373	299.626			368.014	348.289
min		304.002	241.157			320.201	253.622			328.046	244.791			326.357	243.107			319.636	243.018			322.615	252.591			315.74	247.576			326.951	249.774			321.792	255.453			310.613	240.277			317.653	256.255			316.92	265.379
	t68				t69				t70				t71				t72				t73				t74				t75				t76				t77				t78				t79				t80
		Rab5	Rab11			Rab5	Rab11			Rab5	Rab11			Rab5	Rab11			Rab5	Rab11			Rab5	Rab11			Rab5	Rab11			Rab5	Rab11			Rab5	Rab11			Rab5	Rab11			Rab5	Rab11			Rab5	Rab11
	0	0.831756	0.371816		0	0.824732	0.126785		0	0.376211	0.386968		0	0.698358	0.399786		0	0.657667	0.412942		0	0.549623	0.468117		0	0.483874	0.520805		0	0.146359	0.272757		0	0.748735	0.524373		0	0.0296665	0.541961		0	0.159145	0.309356		0	0.790373	0.270267		0
	0.10913	0.325108	0.353075		0.10913	0.65606	0		0.10913	0.378155	0.33384		0.10913	0.715234	0.699595		0.10913	0.858929	0.577265		0.10913	0.33517	0.213197		0.10913	0.636742	0.783986		0.10913	0.203945	0.125983		0.10913	0.822237	0.356978		0.10913	0.179611	0.423934		0.10913	0.101261	0.550646		0.10913	0.909189	0.12656		0.10913
	0.21825	0.529987	0.175084		0.21825	0.406601	0.153571		0.21825	0.509972	0.321921		0.21825	0.547109	0.579484		0.21825	0.919256	0.410271		0.21825	0.471685	0.044338		0.21825	0.638594	1		0.21825	0.205415	0.224936		0.21825	1	0.634193		0.21825	0.238395	0.633606		0.21825	0.0749424	0.416738		0.21825	1	0.148096		0.21825
	0.32738	0.43178	0.295131		0.32738	0.496598	0.164325		0.32738	0.431129	0.245665		0.32738	0.648214	0.519962		0.32738	0.920069	0.719857		0.32738	0.56552	0.524919		0.32738	0.771628	0.867474		0.32738	0.158372	0.369201		0.32738	0.820093	0.64869		0.32738	0.226903	0.89544		0.32738	0.0487881	0.413044		0.32738	0.872921	0.250792		0.32738
	0.43651	0.325603	0.206641		0.43651	0.357757	0.0702889		0.43651	0.485043	0.139139		0.43651	0.800647	0.295578		0.43651	1	0.801415		0.43651	0.832767	0.459289		0.43651	0.678212	0.449313		0.43651	0.0744588	0.500127		0.43651	0.49327	0.686293		0.43651	0.00780386	1		0.43651	0.149734	0.5282		0.43651	0.46882	0.222068		0.43651
	0.54563	0.40133	0.142974		0.54563	0.378841	0.11336		0.54563	0.270572	0.128363		0.54563	0.705385	0.27319		0.54563	0.883792	0.755545		0.54563	0.940706	0.276053		0.54563	0.578883	0.223398		0.54563	0.0338536	0.457862		0.54563	0.30021	0.67053		0.54563	0	0.78414		0.54563	0.0791498	0.61717		0.54563	0.0800384	0.15505		0.54563
	0.65476	0.537633	0.0967123		0.65476	0.385252	0.0197024		0.65476	0.187748	0.154237		0.65476	0.698551	0.252573		0.65476	0.786833	0.587248		0.65476	1	0		0.65476	0.594181	0.102853		0.65476	0.0949288	0.417279		0.65476	0.100838	0.582199		0.65476	0.0354296	0.561304		0.65476	0	0.675454		0.65476	0.115031	0.168416		0.65476
	0.76389	0.421708	0.0785173		0.76389	0.306787	0.0324518		0.76389	0.197724	0.148517		0.76389	0.608187	0.32856		0.76389	0.703036	0.337181		0.76389	0.775301	0.37317		0.76389	0.59251	0.00653451		0.76389	0.295123	0.473643		0.76389	0.104487	0.401077		0.76389	0.115837	0.709047		0.76389	0.151219	0.608856		0.76389	0.169301	0.202565		0.76389
	0.87302	0.400876	0.18205		0.87302	0.290581	0.0845899		0.87302	0.19895	0.112907		0.87302	0.529515	0.254815		0.87302	0.488652	0.229521		0.87302	0.609151	0.17008		0.87302	0.545286	0		0.87302	0.397676	0.42723		0.87302	0.138357	0.438784		0.87302	0.182878	0.889919		0.87302	0.121501	0.772058		0.87302	0.192096	0.163805		0.87302
	0.98214	0.489004	0.0616844		0.98214	0.127587	0.0494838		0.98214	0.0251338	0.189624		0.98214	0.727422	0.32699		0.98214	0.448451	0		0.98214	0.484849	0.137508		0.98214	0.748749	0.185371		0.98214	0.321027	0.114425		0.98214	0	0.293252		0.98214	0.313081	0.911088		0.98214	0.0558661	0.662237		0.98214	0.236641	0.142894		0.98214
	1.09127	0.456328	0		1.09127	0.0921539	0.00657624		1.09127	0.0463582	0.198392		1.09127	0.648688	0.336534		1.09127	0.293602	0.0678056		1.09127	0.755074	0.027754		1.09127	0.96859	0.2164		1.09127	0.313576	0.0569604		1.09127	0.281585	0.178063		1.09127	0.447484	0.69347		1.09127	0.00772648	0.394778		1.09127	0.107464	0.0754877		1.09127
	1.2004	0.505376	0.235975		1.2004	0.127846	0.236678		1.2004	0.27627	0.0734042		1.2004	0.539139	0.37462		1.2004	0.317477	0.173302		1.2004	0.635192	0.0988671		1.2004	1	0.0850498		1.2004	0.424982	0.0850598		1.2004	0.0811935	0.131774		1.2004	0.406997	0.479644		1.2004	0.0151262	0.427627		1.2004	0	0.0444589		1.2004
	1.30952	0.576266	0.44536		1.30952	0.392713	0.642595		1.30952	0.206148	0.19753		1.30952	0.742044	0.602844		1.30952	0.429331	0.136908		1.30952	0.606107	0.0838917		1.30952	0.648254	0.389483		1.30952	0.142542	0.159482		1.30952	0.278731	0.227805		1.30952	0.329154	0.495706		1.30952	0.102181	0.644813		1.30952	0.0617663	0.0674826		1.30952
	1.41865	0.6737	0.572743		1.41865	0.483968	0.950396		1.41865	0.164792	0.279262		1.41865	0.680293	0.616664		1.41865	0.383991	0.509007		1.41865	0.453152	0.440529		1.41865	0.490127	0.540543		1.41865	0.26692	0.318782		1.41865	0.279931	0.0967613		1.41865	0.545166	0.326581		1.41865	0.166051	0.758185		1.41865	0.166894	0.100697		1.41865
	1.52778	0.498654	0.712696		1.52778	0.347886	0.98209		1.52778	0.282152	0.401456		1.52778	0.618026	0.981985		1.52778	0.341433	0.486522		1.52778	0.501479	0.328039		1.52778	0.617722	0.558485		1.52778	0.288322	0.300468		1.52778	0.28123	0.137961		1.52778	0.500065	0.332865		1.52778	0.160942	0.631862		1.52778	0.157343	0.102073		1.52778
	1.6369	0.610004	0.628622		1.6369	0.306366	1		1.6369	0.514866	0.546886		1.6369	0.409582	1		1.6369	0.22053	0.757878		1.6369	0.51349	0.570146		1.6369	0.510099	0.604605		1.6369	0.209298	0.182852		1.6369	0.267896	0.179251		1.6369	0.561503	0.378263		1.6369	0.223398	0.907691		1.6369	0.222708	0.00804002		1.6369
	1.74603	0.177214	0.421755		1.74603	0.192811	0.932365		1.74603	0.45609	0.755682		1.74603	0.306678	0.845875		1.74603	0.136553	0.921622		1.74603	0.433096	0.401633		1.74603	0.444271	0.533706		1.74603	0.274819	0.295798		1.74603	0.0696232	0.220216		1.74603	0.51559	0.296982		1.74603	0.284117	1		1.74603	0.221473	0.0297696		1.74603
	1.85516	0.11643	0.340193		1.85516	0.121033	0.906323		1.85516	0.425877	0.956412		1.85516	0.266038	0.598406		1.85516	0.116087	0.814636		1.85516	0.217275	0.244262		1.85516	0.397776	0.534839		1.85516	0.0833278	0.126814		1.85516	0.0260564	0.0777483		1.85516	0.404069	0.117624		1.85516	0.34899	0.830171		1.85516	0.329288	0		1.85516
	1.96429	0.180899	0.12882		1.96429	0.134409	0.856124		1.96429	0.491069	0.941347		1.96429	0.20484	0.425487		1.96429	0.0272349	0.490146		1.96429	0.0725539	0.33116		1.96429	0.222846	0.594398		1.96429	0.182028	0.121797		1.96429	0.098987	0		1.96429	0.293459	0.1764		1.96429	0.282706	0.620428		1.96429	0.492858	0.040176		1.96429
	2.07341	0	0.1758		2.07341	0.218572	0.714428		2.07341	0.425879	0.776777		2.07341	0.159972	0.278062		2.07341	0	0.226774		2.07341	0.0372629	0.218013		2.07341	0.0249007	0.656862		2.07341	0.167232	0.105843		2.07341	0.0132473	0.0674721		2.07341	0.29718	0.255737		2.07341	0.0928297	0.222408		2.07341	0.430401	0.143788		2.07341
	2.18254	0.294748	0.30574		2.18254	0.223873	0.410487		2.18254	0.338072	0.396232		2.18254	0.195613	0.115572		2.18254	0.122123	0.0940441		2.18254	0.272757	0.2648		2.18254	0	0.607809		2.18254	0	0		2.18254	0.0617036	0.121478		2.18254	0.0308945	0.00434805		2.18254	0.241804	0.0445554		2.18254	0.342886	0.297249		2.18254
	2.29167	0.279239	0.19958		2.29167	0	0.352665		2.29167	0.302699	0.398555		2.29167	0	0.260666		2.29167	0.180595	0.283764		2.29167	0.216712	0.991964		2.29167	0.200224	0.443115		2.29167	0.0436416	0.177759		2.29167	0.465269	0.255353		2.29167	0.320122	0		2.29167	0.0345549	0.148141		2.29167	0.56999	0.400488		2.29167
	2.40079	0.270046	0.325085		2.40079	0.314506	0.377426		2.40079	0.153874	0.563301		2.40079	0.122389	0.30927		2.40079	0.212439	0.334526		2.40079	0.204998	0.740804		2.40079	0.309796	0.488221		2.40079	0.0775636	0.134164		2.40079	0.381646	0.206942		2.40079	0.297769	0.169012		2.40079	0.103112	0.112336		2.40079	0.623169	0.505318		2.40079
	2.50992	0.385262	0.442591		2.50992	0.358807	0.456514		2.50992	0.17409	0.59862		2.50992	0.301052	0.225803		2.50992	0.224746	0.310358		2.50992	0.122507	0.608513		2.50992	0.352169	0.570315		2.50992	0.135346	0.108522		2.50992	0.388819	0.273668		2.50992	0.349614	0.230593		2.50992	0.0233416	0.229351		2.50992	0.553576	0.49463		2.50992
	2.61905	0.439861	0.512031		2.61905	0.124839	0.295663		2.61905	0	0.720145		2.61905	0.391209	0.0765971		2.61905	0.392107	0.443051		2.61905	0.187779	1		2.61905	0.199311	0.616214		2.61905	0.103204	0.285624		2.61905	0.394263	0.405019		2.61905	0.382858	0.242353		2.61905	0.0326198	0		2.61905	0.688769	0.344379		2.61905
	2.72817	0.414907	0.425766		2.72817	0.254838	0.270692		2.72817	0.162785	0.813411		2.72817	0.40727	0		2.72817	0.362419	0.642684		2.72817	0.085088	0.653481		2.72817	0.530818	0.642802		2.72817	0.0825078	0.641623		2.72817	0.328002	0.668347		2.72817	0.634518	0.249306		2.72817	0.173989	0.148642		2.72817	0.476269	0.471767		2.72817
	2.8373	0.451489	0.220818		2.8373	0.375829	0.192458		2.8373	0.165572	0.833606		2.8373	0.382183	0.174673		2.8373	0.288155	0.634518		2.8373	0	0.69081		2.8373	0.281623	0.769933		2.8373	0.276166	0.842876		2.8373	0.312401	0.933318		2.8373	0.616189	0.363013		2.8373	0.0886725	0.0277053		2.8373	0.477115	0.394097		2.8373
	2.94643	0.447182	0.115008		2.94643	0.292061	0.129485		2.94643	0.14911	0.889006		2.94643	0.350088	0.127655		2.94643	0.41722	0.646172		2.94643	0.130978	0.512594		2.94643	0.195453	0.870081		2.94643	0.433526	0.854561		2.94643	0.435203	0.961434		2.94643	0.464363	0.297538		2.94643	0.211172	0.284789		2.94643	0.42285	0.606777		2.94643
	3.05556	0.359355	0.142274		3.05556	0.429154	0.137748		3.05556	0.213666	1		3.05556	0.608092	0.195091		3.05556	0.385977	0.686638		3.05556	0.199557	0.496605		3.05556	0.310232	0.809232		3.05556	0.43147	1		3.05556	0.585898	1		3.05556	0.536874	0.377622		3.05556	0.189099	0.344415		3.05556	0.301617	0.800747		3.05556
	3.16468	0.452721	0.275931		3.16468	0.590447	0.224538		3.16468	0.456401	0.864925		3.16468	0.862491	0.165509		3.16468	0.355065	0.777549		3.16468	0.150245	0.684525		3.16468	0.293255	0.833638		3.16468	0.420501	0.812554		3.16468	0.672194	0.789277		3.16468	0.790941	0.411402		3.16468	0.231183	0.589995		3.16468	0.293998	0.899283		3.16468
	3.27381	0.467653	0.181067		3.27381	0.788134	0.266721		3.27381	0.778858	0.50557		3.27381	0.968918	0.108556		3.27381	0.513396	0.679196		3.27381	0.142212	0.816878		3.27381	0.395495	0.960599		3.27381	0.535027	0.504232		3.27381	0.77956	0.627995		3.27381	0.783295	0.336825		3.27381	0.273483	0.675613		3.27381	0.308886	1		3.27381
	3.38294	0.711028	0.253841		3.38294	0.83399	0.163941		3.38294	1	0.312583		3.38294	1	0.0689606		3.38294	0.65424	0.851031		3.38294	0.425279	0.57198		3.38294	0.724274	0.977186		3.38294	0.724755	0.394564		3.38294	0.562441	0.423509		3.38294	0.74286	0.354189		3.38294	0.428787	0.666568		3.38294	0.401695	0.921507		3.38294
	3.49206	0.97575	0.695962		3.49206	0.79779	0.2475		3.49206	0.894641	0.111565		3.49206	0.878429	0.129248		3.49206	0.538089	1		3.49206	0.587932	0.466166		3.49206	0.740655	0.860961		3.49206	0.906348	0.367467		3.49206	0.540935	0.324927		3.49206	1	0.445169		3.49206	0.55848	0.632266		3.49206	0.377992	0.676504		3.49206
	3.60119	0.940691	1		3.60119	1	0.427974		3.60119	0.733926	0.184034		3.60119	0.727357	0.240669		3.60119	0.538249	0.927586		3.60119	0.407673	0.459981		3.60119	0.719873	0.740989		3.60119	1	0.496234		3.60119	0.594306	0.396063		3.60119	0.755417	0.546817		3.60119	0.836843	0.525989		3.60119	0.162163	0.415126		3.60119
	3.71032	0.870738	0.909044		3.71032	0.832436	0.520293		3.71032	0.523503	0		3.71032	0.807801	0.0110331		3.71032	0.615295	0.821131		3.71032	0.455428	0.263548		3.71032	0.790278	0.60258		3.71032	0.68767	0.338928		3.71032	0.536945	0.570873		3.71032	0.881377	0.522281		3.71032	0.878019	0.595623		3.71032	0.123934	0.251081		3.71032
	3.81944	1	0.645217		3.81944	0.626001	0.484406		3.81944	0.534467	0.26266		3.81944	0.700794	0.206209		3.81944	0.619536	0.787825		3.81944	0.562834	0.601643		3.81944	0.627939	0.494014		3.81944	0.436723	0.512084		3.81944	0.64314	0.428102		3.81944	0.707292	0.514668		3.81944	0.827541	0.527379		3.81944	0.310493	0.211441		3.81944
	3.92857	0.719745	0.5425		3.92857	0.591997	0.364634		3.92857	0.432875	0.281547		3.92857	0.50761	0.417769		3.92857	0.674973	0.518847		3.92857	0.631922	0.291385		3.92857	0.446639	0.454153		3.92857	0.261529	0.338859		3.92857	0.6005	0.484535		3.92857	0.641263	0.532633		3.92857	0.967254	0.590318		3.92857	0.29866	0.173412		3.92857
	4.0377	0.901824	0.475698		4.0377	0.813811	0.174873		4.0377	0.60804	0.082533		4.0377	0.695973	0.596197		4.0377	0.656197	0.387947		4.0377	0.596068	0.317897		4.0377	0.839663	0.363376		4.0377	0.282206	0.183298		4.0377	0.58253	0.40887		4.0377	0.68585	0.480622		4.0377	1	0.404944		4.0377	0.247866	0.161794		4.0377
					4.14683	0.75799	0.0644203		4.14683	0.428437	0.284084		4.14683	0.724389	0.598952		4.14683	0.515569	0.302418		4.14683	0.626616	0.54262		4.14683	0.80856	0.349034										4.14683	0.52642	0.39153		4.14683	0.554858	0.256427		4.14683	0.379957	0.229616
					4.25595	0.550742	0.0328365		4.25595	0.551297	0.231151		4.25595	0.737867	0.506005		4.25595	0.413619	0.230136		4.25595	0.213975	0.47597		4.25595	0.939152	0.352415										4.25595	0.133166	0.456642		4.25595	0.352693	0.293385		4.25595	0.533254	0.248679
line profiles normalised for overall min-max
max		355.475	300.992			378.568	340.952			393.452	301.26			380.262	287.564			385.453	278.801			379.771	281.498			363.257	304.887			395.617	296.373			373.373	313.393			367.943	286.159			395.373	299.626			368.014	348.289
min		304.002	241.157			320.201	253.622			328.046	244.791			326.357	243.107			319.636	243.018			322.615	252.591			315.74	247.576			326.951	249.774			321.792	255.453			310.613	240.277			317.653	256.255			316.92	265.379
max		407.945	348.289
min		271.901	240.277
max		407.945	348.289			407.945	348.289			407.945	348.289			407.945	348.289			407.945	348.289			407.945	348.289			407.945	348.289			407.945	348.289			407.945	348.289			407.945	348.289			407.945	348.289			407.945	348.289
min		271.901	240.277			271.901	240.277			271.901	240.277			271.901	240.277			271.901	240.277			271.901	240.277			271.901	240.277			271.901	240.277			271.901	240.277			271.901	240.277			271.901	240.277			271.901	240.277
	t68				t69				t70				t71				t72				t73				t74				t75				t76				t77				t78				t79				t80
		Rab5	Rab11			Rab5	Rab11			Rab5	Rab11			Rab5	Rab11			Rab5	Rab11			Rab5	Rab11			Rab5	Rab11			Rab5	Rab11			Rab5	Rab11			Rab5	Rab11			Rab5	Rab11			Rab5	Rab11
	0	0.55066	0.214124		0	0.708868	0.226063		0	0.59357	0.244104		0	0.676994	0.190752		0	0.669054	0.162186		0	0.603692	0.239291		0	0.491247	0.343915		0	0.478524	0.205604		0	0.65061	0.421792		0	0.297058	0.230221		0	0.427224	0.27215		0	0.62776	0.439856		0
	0.10913	0.358969	0.203742		0.10913	0.636503	0.123555		0.10913	0.594505	0.216329		0.10913	0.683681	0.314152		0.10913	0.766421	0.216624		0.10913	0.513594	0.171066		0.10913	0.544639	0.483559		0.10913	0.507589	0.142282		0.10913	0.678478	0.331998		0.10913	0.360246	0.180084		0.10913	0.394156	0.369036		0.10913	0.672384	0.329546		0.10913
	0.21825	0.436485	0.105141		0.21825	0.52948	0.247719		0.21825	0.657879	0.210097		0.21825	0.617064	0.264715		0.21825	0.795607	0.1613		0.21825	0.570948	0.125874		0.21825	0.545286	0.598176		0.21825	0.508331	0.184973		0.21825	0.745876	0.480701		0.21825	0.385018	0.26915		0.21825	0.379121	0.315267		0.21825	0.706489	0.346078		0.21825
	0.32738	0.399328	0.171643		0.32738	0.568091	0.256414		0.32738	0.619974	0.17023		0.32738	0.657125	0.240216		0.32738	0.796	0.263863		0.32738	0.610371	0.254493		0.32738	0.591751	0.527858		0.32738	0.484587	0.247212		0.32738	0.677665	0.488478		0.32738	0.380176	0.380375		0.32738	0.364179	0.313784		0.32738	0.658762	0.424907		0.32738
	0.43651	0.359156	0.122622		0.43651	0.508524	0.180384		0.43651	0.645894	0.114537		0.43651	0.717524	0.14786		0.43651	0.83467	0.290882		0.43651	0.722649	0.236928		0.43651	0.559124	0.305981		0.43651	0.442233	0.303697		0.43651	0.553752	0.508649		0.43651	0.287845	0.424791		0.43651	0.421848	0.360024		0.43651	0.506994	0.402859		0.43651
	0.54563	0.387808	0.0873532		0.54563	0.51757	0.215208		0.54563	0.542783	0.108904		0.54563	0.679778	0.138646		0.54563	0.77845	0.275686		0.54563	0.767997	0.187888		0.54563	0.524431	0.186112		0.54563	0.421738	0.285462		0.54563	0.480555	0.500193		0.54563	0.284556	0.333096		0.54563	0.381524	0.395748		0.54563	0.36098	0.351415		0.54563
	0.65476	0.439378	0.0617255		0.65476	0.52032	0.139484		0.65476	0.502963	0.122431		0.65476	0.67707	0.130159		0.65476	0.731542	0.219931		0.65476	0.792908	0.114008		0.65476	0.529774	0.12215		0.65476	0.452565	0.267954		0.65476	0.404964	0.45281		0.65476	0.299487	0.238437		0.65476	0.336308	0.419151		0.65476	0.374122	0.361675		0.65476
	0.76389	0.395518	0.0516461		0.76389	0.486657	0.149792		0.76389	0.50776	0.11944		0.76389	0.641265	0.161436		0.76389	0.691003	0.137086		0.76389	0.698506	0.21388		0.76389	0.52919	0.0710439		0.76389	0.55361	0.292271		0.76389	0.406347	0.355654		0.76389	0.333371	0.301197		0.76389	0.422696	0.39241		0.76389	0.394504	0.387888		0.76389
	0.87302	0.387636	0.109		0.87302	0.479704	0.191947		0.87302	0.508349	0.100823		0.87302	0.610093	0.131083		0.87302	0.587287	0.10142		0.87302	0.628702	0.159527		0.87302	0.512696	0.0675767		0.87302	0.605372	0.272247		0.87302	0.419189	0.37588		0.87302	0.361623	0.37803		0.87302	0.405719	0.457941		0.87302	0.403065	0.358136		0.87302
	0.98214	0.420979	0.0423212		0.98214	0.409775	0.163563		0.98214	0.424784	0.140931		0.98214	0.68851	0.160789		0.98214	0.567838	0.0253823		0.98214	0.576479	0.150809		0.98214	0.58376	0.165934		0.98214	0.566684	0.137296		0.98214	0.366731	0.297815		0.98214	0.416492	0.387022		0.98214	0.368223	0.413844		0.98214	0.419795	0.342085		0.98214
	1.09127	0.408616	0.00815001		1.09127	0.394574	0.128872		1.09127	0.434988	0.145515		1.09127	0.657313	0.164718		1.09127	0.492924	0.0478456		1.09127	0.690008	0.121435		1.09127	0.660545	0.182398		1.09127	0.562924	0.112504		1.09127	0.473493	0.236025		1.09127	0.47313	0.29458		1.09127	0.340722	0.30645		1.09127	0.37128	0.290343		1.09127
	1.2004	0.427173	0.138872		1.2004	0.409886	0.314913		1.2004	0.545522	0.0801706		1.2004	0.613906	0.180394		1.2004	0.504475	0.0827954		1.2004	0.639642	0.140468		1.2004	0.671516	0.112704		1.2004	0.619154	0.124627		1.2004	0.397516	0.211195		1.2004	0.456069	0.203748		1.2004	0.344949	0.31964		1.2004	0.33092	0.266526		1.2004
	1.30952	0.453995	0.254865		1.30952	0.523521	0.643104		1.30952	0.51181	0.145064		1.30952	0.694304	0.274329		1.30952	0.558588	0.0707384		1.30952	0.627423	0.13646		1.30952	0.54866	0.274236		1.30952	0.476597	0.156734		1.30952	0.472411	0.262708		1.30952	0.423265	0.210572		1.30952	0.394682	0.406848		1.30952	0.354117	0.284199		1.30952
	1.41865	0.490859	0.325431		1.41865	0.562672	0.891966		1.41865	0.491927	0.187795		1.41865	0.669836	0.280018		1.41865	0.536653	0.194011		1.41865	0.563162	0.231907		1.41865	0.49343	0.354388		1.41865	0.539375	0.22546		1.41865	0.472866	0.192414		1.41865	0.514295	0.138729		1.41865	0.431169	0.452371		1.41865	0.3936	0.309694		1.41865
	1.52778	0.42463	0.40296		1.52778	0.504289	0.917591		1.52778	0.54835	0.251678		1.52778	0.645164	0.430382		1.52778	0.516064	0.186562		1.52778	0.583466	0.201801		1.52778	0.537996	0.363908		1.52778	0.550177	0.217559		1.52778	0.473358	0.214514		1.52778	0.495289	0.141398		1.52778	0.428251	0.401648		1.52778	0.390013	0.31075		1.52778
	1.6369	0.46676	0.356386		1.6369	0.486476	0.932071		1.6369	0.660232	0.327711		1.6369	0.562572	0.437797		1.6369	0.457573	0.276459		1.6369	0.588512	0.266597		1.6369	0.500406	0.38838		1.6369	0.510291	0.166816		1.6369	0.468303	0.236662		1.6369	0.521179	0.160683		1.6369	0.463931	0.512403		1.6369	0.414562	0.23857		1.6369
	1.74603	0.303013	0.241789		1.74603	0.437758	0.877388		1.74603	0.631974	0.43687		1.74603	0.521798	0.37436		1.74603	0.416946	0.330706		1.74603	0.554736	0.221497		1.74603	0.477414	0.350761		1.74603	0.543362	0.215544		1.74603	0.393129	0.258637		1.74603	0.501831	0.126155		1.74603	0.498618	0.549468		1.74603	0.414098	0.25525		1.74603
	1.85516	0.280015	0.196606		1.85516	0.406964	0.856332		1.85516	0.617449	0.541813		1.85516	0.505696	0.272503		1.85516	0.407045	0.295262		1.85516	0.464064	0.17938		1.85516	0.461175	0.351362		1.85516	0.44671	0.142641		1.85516	0.376611	0.182215		1.85516	0.454835	0.0499657		1.85516	0.535679	0.481276		1.85516	0.45459	0.232399		1.85516
	1.96429	0.304407	0.0795124		1.96429	0.412702	0.815746		1.96429	0.648791	0.533937		1.96429	0.481447	0.20133		1.96429	0.36406	0.187762		1.96429	0.403262	0.202637		1.96429	0.400076	0.382964		1.96429	0.496527	0.140476		1.96429	0.404262	0.140509		1.96429	0.408223	0.0749333		1.96429	0.497812	0.397056		1.96429	0.516022	0.263238		1.96429
	2.07341	0.235963	0.105537		2.07341	0.44881	0.701182		2.07341	0.617449	0.447899		2.07341	0.463669	0.140651		2.07341	0.350884	0.10051		2.07341	0.388435	0.172355		2.07341	0.33094	0.416107		2.07341	0.489059	0.133593		2.07341	0.371754	0.176702		2.07341	0.409791	0.108635		2.07341	0.38934	0.237237		2.07341	0.492565	0.342771		2.07341
	2.18254	0.347482	0.17752		2.18254	0.451085	0.455441		2.18254	0.575235	0.248947		2.18254	0.477791	0.0737704		2.18254	0.409965	0.0565381		2.18254	0.487373	0.184877		2.18254	0.322242	0.390079		2.18254	0.404651	0.08793		2.18254	0.390126	0.205672		2.18254	0.297575	0.00184702		2.18254	0.474445	0.165823		2.18254	0.459697	0.460568		2.18254
	2.29167	0.341614	0.118711		2.29167	0.355038	0.40869		2.29167	0.558228	0.250162		2.29167	0.400283	0.133491		2.29167	0.438253	0.11939		2.29167	0.463827	0.379489		2.29167	0.392175	0.302693		2.29167	0.426679	0.16462		2.29167	0.543136	0.277485		2.29167	0.419459	0		2.29167	0.356048	0.207417		2.29167	0.544991	0.539814		2.29167
	2.40079	0.338136	0.188236		2.40079	0.489968	0.42871		2.40079	0.486678	0.336292		2.40079	0.448777	0.153496		2.40079	0.453659	0.136207		2.40079	0.458906	0.312271		2.40079	0.430446	0.326626		2.40079	0.4438	0.145811		2.40079	0.51143	0.251516		2.40079	0.410039	0.0717947		2.40079	0.395213	0.193039		2.40079	0.564963	0.620281		2.40079
	2.50992	0.381728	0.253331		2.50992	0.508975	0.492654		2.50992	0.496397	0.354757		2.50992	0.519569	0.119141		2.50992	0.459613	0.1282		2.50992	0.424249	0.276865		2.50992	0.445245	0.370185		2.50992	0.472965	0.134749		2.50992	0.51415	0.287309		2.50992	0.431887	0.0979538		2.50992	0.349642	0.240025		2.50992	0.538826	0.612078		2.50992
	2.61905	0.402386	0.291799		2.61905	0.408596	0.362603		2.61905	0.4127	0.418291		2.61905	0.555292	0.0577287		2.61905	0.54058	0.17216		2.61905	0.451671	0.38164		2.61905	0.391856	0.394539		2.61905	0.456742	0.211155		2.61905	0.516214	0.357768		2.61905	0.445897	0.10295		2.61905	0.354943	0.147933		2.61905	0.5896	0.496744		2.61905
	2.72817	0.392944	0.244011		2.72817	0.464369	0.342413		2.72817	0.490962	0.467051		2.72817	0.561656	0.0262017		2.72817	0.526217	0.238296		2.72817	0.408528	0.2889		2.72817	0.507643	0.408647		2.72817	0.446296	0.364742		2.72817	0.491092	0.499022		2.72817	0.551949	0.105903		2.72817	0.435704	0.207617		2.72817	0.509792	0.594528		2.72817
	2.8373	0.406785	0.130476		2.8373	0.516277	0.27916		2.8373	0.492302	0.477609		2.8373	0.551716	0.0980964		2.8373	0.490289	0.235591		2.8373	0.37278	0.298891		2.8373	0.420606	0.476102		2.8373	0.544042	0.451567		2.8373	0.485177	0.641157		2.8373	0.544225	0.154205		2.8373	0.386965	0.159057		2.8373	0.51011	0.534909		2.8373
	2.94643	0.405156	0.0718605		2.94643	0.480339	0.228246		2.94643	0.484388	0.506573		2.94643	0.538999	0.078744		2.94643	0.552729	0.239452		2.94643	0.427808	0.251194		2.94643	0.390509	0.529241		2.94643	0.623467	0.456608		2.94643	0.531736	0.656239		2.94643	0.480244	0.126391		2.94643	0.456946	0.262285		2.94643	0.489729	0.698162		2.94643
	3.05556	0.371926	0.0869653		3.05556	0.539155	0.234926		3.05556	0.515424	0.564602		3.05556	0.641228	0.1065		3.05556	0.537614	0.252858		3.05556	0.45662	0.246915		3.05556	0.430598	0.496955		3.05556	0.622429	0.519354		3.05556	0.588871	0.676926		3.05556	0.510801	0.160411		3.05556	0.444336	0.286227		3.05556	0.444198	0.847053		3.05556
	3.16468	0.407251	0.161007		3.16468	0.608354	0.305097		3.16468	0.632123	0.493984		3.16468	0.742029	0.0943246		3.16468	0.522659	0.282976		3.16468	0.435902	0.297208		3.16468	0.424668	0.509904		3.16468	0.616892	0.438485		3.16468	0.62159	0.563891		3.16468	0.617867	0.17476		3.16468	0.468378	0.384837		3.16468	0.441336	0.922689		3.16468
	3.27381	0.412901	0.108455		3.27381	0.693167	0.339203		3.27381	0.787151	0.30611		3.27381	0.784198	0.0708828		3.27381	0.599258	0.250392		3.27381	0.432528	0.33263		3.27381	0.460378	0.57727		3.27381	0.674698	0.305468		3.27381	0.662297	0.477376		3.27381	0.614645	0.14308		3.27381	0.492543	0.419215		3.27381	0.446928	1		3.27381
	3.38294	0.504983	0.148769		3.38294	0.71284	0.256104		3.38294	0.893469	0.205215		3.38294	0.796514	0.0545856		3.38294	0.667396	0.307319		3.38294	0.551452	0.267088		3.38294	0.575212	0.58607		3.38294	0.77046	0.258154		3.38294	0.579978	0.367687		3.38294	0.597605	0.150456		3.38294	0.581266	0.415583		3.38294	0.481784	0.939748		3.38294
	3.49206	0.605141	0.39369		3.49206	0.697309	0.323663		3.49206	0.842815	0.100121		3.49206	0.748343	0.0793994		3.49206	0.611204	0.356671		3.49206	0.619787	0.238769		3.49206	0.580933	0.524401		3.49206	0.862116	0.246464		3.49206	0.571824	0.314805		3.49206	0.705967	0.189104		3.49206	0.655357	0.40181		3.49206	0.472882	0.751684		3.49206
	3.60119	0.591876	0.562118		3.60119	0.784063	0.469579		3.60119	0.765549	0.138009		3.60119	0.688484	0.12526		3.60119	0.611281	0.332681		3.60119	0.544055	0.237113		3.60119	0.573675	0.460745		3.60119	0.909385	0.302017		3.60119	0.592059	0.352964		3.60119	0.602897	0.232283		3.60119	0.814381	0.359136		3.60119	0.391823	0.55105		3.60119
	3.71032	0.565409	0.511731		3.71032	0.712174	0.544221		3.71032	0.664384	0.0417944		3.71032	0.720358	0.0307429		3.71032	0.648555	0.297414		3.71032	0.564118	0.184541		3.71032	0.598265	0.387305		3.71032	0.751742	0.234152		3.71032	0.570311	0.446735		3.71032	0.655978	0.22186		3.71032	0.837904	0.387096		3.71032	0.377465	0.425129		3.71032
	3.81944	0.614316	0.365579		3.81944	0.623608	0.515205		3.81944	0.669655	0.179115		3.81944	0.677959	0.111076		3.81944	0.650606	0.28638		3.81944	0.609243	0.275027		3.81944	0.541565	0.3297		3.81944	0.62508	0.308855		3.81944	0.610574	0.37015		3.81944	0.582617	0.218626		3.81944	0.809066	0.359694		3.81944	0.447532	0.394701		3.81944
	3.92857	0.508281	0.308677		3.92857	0.609019	0.418367		3.92857	0.620813	0.188989		3.92857	0.601414	0.198154		3.92857	0.677426	0.19727		3.92857	0.638268	0.191991		3.92857	0.478241	0.30855		3.92857	0.536654	0.234122		3.92857	0.594408	0.400422		3.92857	0.554791	0.226258		3.92857	0.888882	0.384966		3.92857	0.443087	0.36551		3.92857
	4.0377	0.577171	0.271671		4.0377	0.704183	0.264943		4.0377	0.705027	0.0849433		4.0377	0.676049	0.271594		4.0377	0.668342	0.153905		4.0377	0.623205	0.199087		4.0377	0.615514	0.260384		4.0377	0.54709	0.167009		4.0377	0.587595	0.359834		4.0377	0.573581	0.204164		4.0377	0.907589	0.310532		4.0377	0.424011	0.356592		4.0377
					4.14683	0.680234	0.17564		4.14683	0.618679	0.190316		4.14683	0.687308	0.272728		4.14683	0.600309	0.12557		4.14683	0.636039	0.25923		4.14683	0.604651	0.252774										4.14683	0.506395	0.166318		4.14683	0.653288	0.250897		4.14683	0.47362	0.408652
					4.25595	0.59132	0.150104		4.25595	0.677747	0.162642		4.25595	0.692648	0.234471		4.25595	0.550987	0.101624		4.25595	0.462677	0.241392		4.25595	0.650263	0.254568										4.25595	0.340674	0.193977		4.25595	0.537795	0.265737		4.25595	0.531194	0.423285
[truncated: 20 more columns]

## Sheet: 10
endosome 10
max		341.229	390.104			311.045	404.661			321.189	413.911			309.877	411.482			376.464	437.112			363.101	415.977			377.822	438.68			409.667	448.525			395.036	378.019			358.165	398.954			318.628	386.061
min		239.896	289.608			253.448	313.991			248.197	297.567			247.17	310.484			276.14	325.313			270.698	316.467			278.735	335.643			318.641	313.954			284.897	336.191			302.856	319.015			274.783	341.596
	t12				t13				t14				t15				t16				t17				t18				t19				t20				t21				t22
		Rab5	Rab11			Rab5	Rab11			Rab5	Rab11			Rab5	Rab11			Rab5	Rab11			Rab5	Rab11			Rab5	Rab11			Rab5	Rab11			Rab5	Rab11			Rab5	Rab11			Rab5	Rab11
	0	248.209	295.359		0	254.393	321.681		0	248.197	332.535		0	254.177	351.237		0	292.241	380.127		0	280.476	324.964		0	295.056	380.599		0	336.303	323.557		0	376.875	348.329		0	310.447	343.085		0	293.024	348.297
	0.10913	242.699	289.608		0.10913	254.071	320.557		0.10913	248.442	327.013		0.10913	247.17	354.647		0.10913	296.185	365.592		0.10913	283.458	324.33		0.10913	282.794	361.556		0.10913	331.735	322.513		0.10913	353.228	355.837		0.10913	322.649	348.319		0.10913	306.268	351.301
	0.21825	239.896	300.981		0.21825	264.156	317.832		0.21825	250.058	327.943		0.21825	253.156	358.09		0.21825	309.76	350.741		0.21825	277.036	323.271		0.21825	278.735	351.379		0.21825	324.825	323.386		0.21825	349.024	346.301		0.21825	327.845	350.025		0.21825	312.199	350.92
	0.32738	240.386	303.107		0.32738	265.589	315.806		0.32738	248.627	326.333		0.32738	255.539	355.072		0.32738	304.723	348.52		0.32738	279.07	320.243		0.32738	281.435	342.534		0.32738	327.913	324.464		0.32738	363.444	336.191		0.32738	325.598	345.74		0.32738	310.85	354.95
	0.43651	242.273	303.594		0.43651	265.07	322.985		0.43651	249.504	318.83		0.43651	250.394	346.996		0.43651	289.669	351.165		0.43651	282.348	332.034		0.43651	279.355	335.643		0.43651	335.027	319.207		0.43651	350.132	353.523		0.43651	325.059	331.66		0.43651	318.628	346.264
	0.54563	248.608	310.58		0.54563	266.138	330.573		0.54563	253.251	325.817		0.54563	249.229	334.027		0.54563	276.14	358.809		0.54563	279.397	344.092		0.54563	284.245	335.709		0.54563	330.39	313.954		0.54563	331.176	365.691		0.54563	328.189	319.015		0.54563	316.599	348.638
	0.65476	256.783	314.926		0.65476	261.804	330.101		0.65476	254.189	321.301		0.65476	257.192	325.139		0.65476	279.144	353.116		0.65476	272.358	354.081		0.65476	284.542	347.752		0.65476	324.299	320.375		0.65476	313.233	363.786		0.65476	324.254	319.517		0.65476	302.99	347.956
	0.76389	249.689	302.981		0.76389	266.948	323.952		0.76389	252.091	305.602		0.76389	261.8	310.484		0.76389	284.558	347.794		0.76389	270.698	367.985		0.76389	282.918	352.575		0.76389	333.606	327.244		0.76389	300.896	357.237		0.76389	321.71	323.942		0.76389	298.073	348.898
	0.87302	248.227	316.003		0.87302	265.823	329.997		0.87302	257.908	304.616		0.87302	254.086	312.825		0.87302	278.995	356.891		0.87302	274.997	397.887		0.87302	280.464	361.978		0.87302	323.741	319.955		0.87302	295.999	359.201		0.87302	328.023	327.467		0.87302	288.191	353.065
	0.98214	246.571	310.185		0.98214	263.984	334.207		0.98214	255.083	298.101		0.98214	253.999	323.044		0.98214	286.17	351.25		0.98214	281.384	393.636		0.98214	284.245	365.264		0.98214	318.641	326.481		0.98214	299.3	352.806		0.98214	328.224	325.517		0.98214	274.783	349.502
	1.09127	241.131	314.094		1.09127	261.316	329.728		1.09127	259.609	297.567		1.09127	249.823	318.688		1.09127	307.494	350.276		1.09127	288.014	394.768		1.09127	292.622	351.339		1.09127	328.732	331.086		1.09127	304.649	347.252		1.09127	331.513	324.089		1.09127	275.087	348.405
	1.2004	245.898	313.149		1.2004	266.585	338.689		1.2004	263.125	303.346		1.2004	258.325	319.149		1.2004	303.84	349.582		1.2004	291.987	400.755		1.2004	291.987	353.817		1.2004	321.993	339.11		1.2004	299.494	348.775		1.2004	336.055	338.751		1.2004	279.535	345.791
	1.30952	249.959	314.587		1.30952	267.49	360.452		1.30952	273.505	303.458		1.30952	268.853	327.59		1.30952	296.231	333.59		1.30952	290.488	392.287		1.30952	295.013	355.346		1.30952	332.815	341.995		1.30952	288.539	349.744		1.30952	327.049	339.254		1.30952	276.73	341.596
	1.41865	253.723	315.176		1.41865	263.183	356.438		1.41865	275.721	310.987		1.41865	271.783	325.189		1.41865	308.113	335.04		1.41865	300.608	369.825		1.41865	301.848	350.705		1.41865	345.579	347.455		1.41865	289.059	343.583		1.41865	322.021	341.489		1.41865	277.247	354.134
	1.52778	250.942	323.111		1.52778	265.927	365.391		1.52778	287.997	305.27		1.52778	268.363	324.961		1.52778	310.327	325.313		1.52778	302.286	373.274		1.52778	315.488	351.135		1.52778	362.678	361.471		1.52778	290.929	343.896		1.52778	319.829	344.102		1.52778	286.808	358.084
	1.6369	250.964	330.957		1.6369	279.237	375.896		1.6369	282.33	311.696		1.6369	272.347	324.313		1.6369	308.914	333.607		1.6369	302.207	376.187		1.6369	324.594	358.376		1.6369	387.959	368.679		1.6369	284.897	344.819		1.6369	318.183	353.211		1.6369	297.785	353.024
	1.74603	257.081	342.818		1.74603	280.235	393.749		1.74603	283.168	324.478		1.74603	275.61	327.863		1.74603	309.008	334.008		1.74603	301.405	364.97		1.74603	320.656	376.304		1.74603	394.989	362.397		1.74603	286.364	356.982		1.74603	305.685	345.732		1.74603	286.374	352.083
	1.85516	257.951	353.332		1.85516	280.308	404.661		1.85516	289.265	331.659		1.85516	285.276	337.975		1.85516	294.599	336.593		1.85516	303.424	355.357		1.85516	320.979	399.276		1.85516	400.627	372.822		1.85516	287.268	365.759		1.85516	304.202	359.284		1.85516	274.8	364.248
	1.96429	269.998	341.972		1.96429	281.888	401.22		1.96429	278.909	329.87		1.96429	288.353	340.73		1.96429	294.316	337.766		1.96429	293.114	353.865		1.96429	319.137	418.38		1.96429	403.115	369.975		1.96429	293.06	364.762		1.96429	305.078	363.965		1.96429	282.207	369.232
	2.07341	267.258	349.718		2.07341	291.374	394.627		2.07341	287.747	336.881		2.07341	283.896	344.19		2.07341	298.388	354.585		2.07341	285.369	347.462		2.07341	311.135	403.617		2.07341	383.864	376.637		2.07341	297.699	363.417		2.07341	304.732	362.085		2.07341	276.995	364.008
	2.18254	272.864	366.445		2.18254	293.432	368.676		2.18254	286.354	333.832		2.18254	273.721	345.52		2.18254	298.967	374.787		2.18254	280.25	335.563		2.18254	299.827	385.674		2.18254	383.95	368		2.18254	311.871	350.566		2.18254	317.314	374.285		2.18254	286.822	360.781
	2.29167	269.197	380.225		2.29167	294.254	365.641		2.29167	293.64	349.163		2.29167	273.144	349.171		2.29167	302.545	409.117		2.29167	278.952	333.884		2.29167	301.312	403.231		2.29167	392.005	379.964		2.29167	305.839	350.895		2.29167	319.795	374.776		2.29167	291.63	370.444
	2.40079	263.442	389.386		2.40079	282.656	367.765		2.40079	282.904	356.446		2.40079	270.333	351.26		2.40079	295.682	426.322		2.40079	287.482	347.607		2.40079	310.152	403.754		2.40079	374.198	391.206		2.40079	303.346	351.161		2.40079	317.189	368.481		2.40079	290.643	365.72
	2.50992	270.468	390.104		2.50992	284.985	369.704		2.50992	278.951	359.327		2.50992	270.32	350.926		2.50992	313.129	431.65		2.50992	279.418	352.075		2.50992	309.404	413.727		2.50992	373.031	419.272		2.50992	305.142	359.182		2.50992	325.829	370.299		2.50992	291.79	365.517
	2.61905	277.096	384.015		2.61905	287.63	356.083		2.61905	287.369	359.839		2.61905	269.462	356.86		2.61905	304.975	415.293		2.61905	278.248	355.916		2.61905	311.741	427.602		2.61905	368.512	418.362		2.61905	304.218	361.328		2.61905	355.304	375.527		2.61905	285.596	372.405
	2.72817	279.563	374.235		2.72817	287.521	360.67		2.72817	290.049	365.4		2.72817	266.139	361.826		2.72817	297.201	396.247		2.72817	283.312	365.202		2.72817	308.895	438.68		2.72817	359.465	428.195		2.72817	307.924	367.266		2.72817	351.046	376.9		2.72817	295.161	379.701
	2.8373	286.773	367.043		2.8373	289.392	364.684		2.8373	285.115	368.064		2.8373	265.528	362.386		2.8373	312.363	394.164		2.8373	294.353	369.125		2.8373	310.044	435.032		2.8373	357.565	410.787		2.8373	321.582	375.118		2.8373	358.117	376.632		2.8373	300.297	379.36
	2.94643	290.627	373.965		2.94643	289.591	363.356		2.94643	291.776	374.689		2.94643	265.588	376.179		2.94643	326.56	399.273		2.94643	293.551	381.015		2.94643	317.06	432.364		2.94643	366.298	448.525		2.94643	325.05	363.289		2.94643	358.165	387.114		2.94643	300.348	378.567
	3.05556	305.411	375.566		3.05556	292.241	374.413		3.05556	303.285	391.988		3.05556	277.482	379.577		3.05556	329.364	399.138		3.05556	297.59	394.267		3.05556	320.242	423.049		3.05556	360.489	445.255		3.05556	314.064	363.486		3.05556	341.469	398.954		3.05556	302.685	386.061
	3.16468	315.801	363.165		3.16468	300.142	386.712		3.16468	301.995	401.817		3.16468	280.08	396.099		3.16468	321.512	396.935		3.16468	305.286	397.572		3.16468	325.331	419.458		3.16468	362.418	429.956		3.16468	327.673	370.947		3.16468	330.212	398.172		3.16468	298.292	380.599
	3.27381	311.726	360.714		3.27381	311.045	381.292		3.27381	304.234	413.911		3.27381	285.871	400.184		3.27381	321.911	398.086		3.27381	310.819	410.05		3.27381	336.011	422.317		3.27381	348.687	432.176		3.27381	320.031	376.757		3.27381	334.478	392.988		3.27381	308.764	372.748
	3.38294	308.66	364.857		3.38294	301.763	373.672		3.38294	314.873	404.214		3.38294	292.289	408.834		3.38294	330.393	390.8		3.38294	309.613	410.959		3.38294	351.561	433.9		3.38294	357.332	424.333		3.38294	309.253	369.924		3.38294	337.096	383.422		3.38294	300.549	380.406
	3.49206	317.627	363.385		3.49206	297.742	364.24		3.49206	317.862	388.007		3.49206	294.055	406.712		3.49206	332.024	380.693		3.49206	328.441	415.977		3.49206	356.69	433.96		3.49206	368.335	423.672		3.49206	319.598	374.504		3.49206	329.032	379.169		3.49206	301.018	373.55
	3.60119	321.195	356.328		3.60119	310.261	356.679		3.60119	318.661	385.256		3.60119	296.383	391.81		3.60119	337.693	384.313		3.60119	331.849	405.551		3.60119	366.42	419.199		3.60119	373.369	414.885		3.60119	328.942	378.019		3.60119	325.501	378.527		3.60119	302.473	372.933
	3.71032	341.229	360.046		3.71032	300.135	359.385		3.71032	319.519	375.407		3.71032	304.025	396.744		3.71032	338.761	381.278		3.71032	343.488	403.752		3.71032	368.292	413.27		3.71032	391.925	415.93		3.71032	325.379	368.031		3.71032	315.475	385.507		3.71032	302.206	369.488
	3.81944	337.264	338.672		3.81944	303.335	345.414		3.81944	312.802	354.869		3.81944	294.03	389.421		3.81944	355.202	374.648		3.81944	348.443	403.644		3.81944	371.781	409.299		3.81944	399.422	420.247		3.81944	330.758	364.498		3.81944	318.92	380.091		3.81944	306.2	364.776
	3.92857	323.652	331.235		3.92857	302.069	344.638		3.92857	318.473	351.057		3.92857	305.206	390.491		3.92857	371.683	370.114		3.92857	355.051	399.299		3.92857	376.428	406.509		3.92857	399.438	427.561		3.92857	344.091	364.276		3.92857	311.408	370.548		3.92857	300.304	363.7
	4.0377	317.76	328.081		4.0377	308.074	332.587		4.0377	321.189	353.315		4.0377	309.877	398.394		4.0377	362.82	372.584		4.0377	363.101	381.837		4.0377	377.822	397.199		4.0377	409.667	409.608		4.0377	354.406	363.194		4.0377	324.567	353.131		4.0377	290.885	361.858
	4.14683	314.017	321.553		4.14683	296.986	345.004		4.14683	316.811	346.989		4.14683	302.016	405.674		4.14683	364.556	387.414		4.14683	360.972	379.069		4.14683	369.114	393.763		4.14683	392.61	366.816		4.14683	355.32	352.437		4.14683	317.76	365.529		4.14683	292.382	359.159
	4.25595	318.761	309.312		4.25595	284.784	348.509		4.25595	317.238	340.624		4.25595	298.473	405.724		4.25595	376.464	405.163		4.25595	358.307	381.505		4.25595	349.167	388.866		4.25595	380.719	357.521		4.25595	362.327	342.75		4.25595	317.663	350.351		4.25595	289.863	349.673
	4.36508	309.836	312.971		4.36508	278.725	342.164		4.36508	313.713	339.089		4.36508	291.515	407.693		4.36508	344.288	427.007		4.36508	341.903	366.265		4.36508	333.92	377.754		4.36508	379.821	356.261		4.36508	376.595	356.244		4.36508	306.356	344.122		4.36508	300.766	344.575
	4.47421	300.133	315.891		4.47421	277.526	344.601		4.47421	297.925	343.611		4.47421	277.99	411.482		4.47421	314.077	437.112		4.47421	310.64	339.909		4.47421	329.926	384.366		4.47421	377.352	340.104		4.47421	395.036	364.896		4.47421	307.954	339.732
	4.58333	277.641	313.631		4.58333	266.346	354.627		4.58333	276.992	337.897		4.58333	259.692	411.379		4.58333	298.323	418.02		4.58333	284.002	331.315		4.58333	325.449	378.245		4.58333	363.889	340.771						4.58333	302.856	335.374
	4.69246	262.055	313.055		4.69246	255.414	332.59		4.69246	270.358	333.62		4.69246	262.202	407.591		4.69246	291.303	389.538		4.69246	279.655	316.467		4.69246	314.662	398.945		4.69246	347.162	333.92						4.69246	310.294	345.318
	4.80159	259.075	306.059		4.80159	260.764	329.017		4.80159	260.311	338.37		4.80159	260.423	384.263										4.80159	304.664	398.729		4.80159	343.324	337.116
	4.91071	250.424	298.383		4.91071	259.286	322.134		4.91071	255.454	327.883		4.91071	254.683	376.983										4.91071	299.503	407.966
					5.01984	253.448	313.991		5.01984	251.958	335.413		5.01984	256.314	351.375
line profiles normalised for individual min-max
max		341.229	390.104			311.045	404.661			321.189	413.911			309.877	411.482			376.464	437.112			363.101	415.977			377.822	438.68			409.667	448.525			395.036	378.019			358.165	398.954			318.628	386.061
min		239.896	289.608			253.448	313.991			248.197	297.567			247.17	310.484			276.14	325.313			270.698	316.467			278.735	335.643			318.641	313.954			284.897	336.191			302.856	319.015			274.783	341.596
	t12				t13				t14				t15				t16				t17				t18				t19				t20				t21				t22
		Rab5	Rab11			Rab5	Rab11			Rab5	Rab11			Rab5	Rab11			Rab5	Rab11			Rab5	Rab11			Rab5	Rab11			Rab5	Rab11			Rab5	Rab11			Rab5	Rab11			Rab5	Rab11
	0	0.0820365	0.0572262		0	0.0164002	0.0848154		0	0	0.300557		0	0.111741	0.403503		0	0.16049	0.490291		0	0.105827	0.0853901		0	0.16472	0.436309		0	0.194038	0.0713601		0	0.835108	0.290192		0	0.137253	0.301109		0	0.416041	0.150689
	0.10913	0.0276613	0		0.10913	0.0108027	0.0724176		0.10913	0.00335925	0.253094		0.10913	0	0.437266		0.10913	0.199803	0.360281		0.10913	0.13809	0.0790149		0.10913	0.0409669	0.251492		0.10913	0.143849	0.0636021		0.10913	0.620407	0.469696		0.10913	0.357871	0.366581		0.10913	0.718087	0.218258
	0.21825	0	0.113169		0.21825	0.185901	0.0423636		0.21825	0.0254958	0.261088		0.21825	0.095459	0.471356		0.21825	0.335114	0.227444		0.21825	0.0685963	0.0683707		0.21825	0	0.152722		0.21825	0.067931	0.0700894		0.21825	0.582237	0.241695		0.21825	0.451805	0.387926		0.21825	0.853351	0.209676
	0.32738	0.00483554	0.134324		0.32738	0.210783	0.0200199		0.32738	0.00588691	0.24725		0.32738	0.133458	0.441474		0.32738	0.284907	0.207578		0.32738	0.0906119	0.0379508		0.32738	0.0272558	0.0668789		0.32738	0.101857	0.0781		0.32738	0.713162	0		0.32738	0.411181	0.334322		0.32738	0.822595	0.300319
	0.43651	0.0234573	0.13917		0.43651	0.201775	0.0991994		0.43651	0.017906	0.18276		0.43651	0.0514205	0.361512		0.43651	0.134853	0.231236		0.43651	0.126077	0.156433		0.43651	0.00626014	0		0.43651	0.180014	0.0390352		0.43651	0.592297	0.414354		0.43651	0.401441	0.158181		0.43651	1	0.104963
	0.54563	0.085974	0.208685		0.54563	0.220325	0.182888		0.54563	0.0692469	0.242814		0.54563	0.0328339	0.233104		0.54563	0	0.299609		0.54563	0.0941431	0.277612		0.54563	0.0556116	0.000640547		0.54563	0.129068	0		0.54563	0.420187	0.70527		0.54563	0.458036	0		0.54563	0.953708	0.158363
	0.65476	0.166649	0.25193		0.65476	0.145079	0.177674		0.65476	0.0820894	0.203998		0.65476	0.159824	0.145102		0.65476	0.029943	0.248687		0.65476	0.0179648	0.37799		0.65476	0.058607	0.117521		0.65476	0.0621557	0.0477146		0.65476	0.257275	0.659738		0.65476	0.386883	0.0062848		0.65476	0.643331	0.143034
	0.76389	0.0966418	0.13307		0.76389	0.234383	0.109868		0.76389	0.0533466	0.0690624		0.76389	0.233317	0		0.76389	0.0839081	0.201084		0.76389	0	0.517713		0.76389	0.0422224	0.164329		0.76389	0.164399	0.0987583		0.76389	0.145262	0.503155		0.76389	0.340894	0.0616346		0.76389	0.53118	0.164217
	0.87302	0.0822141	0.262647		0.87302	0.214849	0.176536		0.87302	0.133034	0.0605876		0.87302	0.110288	0.0231787		0.87302	0.0284578	0.282453		0.87302	0.0465267	0.818208		0.87302	0.0174553	0.255588		0.87302	0.0560289	0.0445936		0.87302	0.1008	0.550107		0.87302	0.455034	0.105728		0.87302	0.305804	0.257937
	0.98214	0.0658719	0.204754		0.98214	0.18292	0.222967		0.98214	0.0943454	0.00458984		0.98214	0.108906	0.124359		0.98214	0.0999761	0.231997		0.98214	0.115646	0.775491		0.98214	0.0556096	0.287479		0.98214	0	0.0930884		0.98214	0.130771	0.397217		0.98214	0.45867	0.0813359		0.98214	0	0.177805
	1.09127	0.0121875	0.243651		1.09127	0.136607	0.173566		1.09127	0.156349	0		1.09127	0.042313	0.0812293		1.09127	0.312527	0.223285		1.09127	0.187402	0.78686		1.09127	0.14015	0.152334		1.09127	0.11086	0.127308		1.09127	0.179337	0.264446		1.09127	0.518124	0.0634797		1.09127	0.00692433	0.153127
	1.2004	0.0592305	0.234248		1.2004	0.228086	0.2724		1.2004	0.204517	0.0496717		1.2004	0.1779	0.0857938		1.2004	0.276105	0.217077		1.2004	0.230399	0.847022		1.2004	0.133743	0.176383		1.2004	0.0368235	0.186935		1.2004	0.132533	0.300852		1.2004	0.600246	0.246891		1.2004	0.108385	0.0943384
	1.30952	0.0993062	0.248557		1.30952	0.2438	0.512426		1.30952	0.346716	0.0506343		1.30952	0.345787	0.16937		1.30952	0.200261	0.0740347		1.30952	0.214171	0.761934		1.30952	0.164281	0.191223		1.30952	0.155709	0.208373		1.30952	0.0330673	0.324007		1.30952	0.43741	0.25318		1.30952	0.044406	0
	1.41865	0.136451	0.254418		1.41865	0.169008	0.468149		1.41865	0.377083	0.115348		1.41865	0.392518	0.145597		1.41865	0.318697	0.0870044		1.41865	0.323695	0.536203		1.41865	0.233263	0.14618		1.41865	0.295931	0.248947		1.41865	0.0377886	0.176731		1.41865	0.346511	0.281137		1.41865	0.0561975	0.281963
	1.52778	0.109007	0.333376		1.52778	0.216651	0.566889		1.52778	0.545257	0.0662088		1.52778	0.337965	0.143339		1.52778	0.340766	0		1.52778	0.341854	0.570862		1.52778	0.370918	0.150354		1.52778	0.483788	0.3531		1.52778	0.0547672	0.184204		1.52778	0.306872	0.31383		1.52778	0.274252	0.370793
	1.6369	0.109224	0.411449		1.6369	0.447749	0.682749		1.6369	0.46762	0.121442		1.6369	0.401505	0.136924		1.6369	0.326682	0.0741867		1.6369	0.341002	0.600136		1.6369	0.462824	0.220629		1.6369	0.761521	0.406663		1.6369	0	0.206273		1.6369	0.277118	0.427775		1.6369	0.524623	0.257015
	1.74603	0.169589	0.529474		1.74603	0.465078	0.879656		1.74603	0.479101	0.231305		1.74603	0.453541	0.172073		1.74603	0.327619	0.0777735		1.74603	0.332317	0.487417		1.74603	0.423075	0.394625		1.74603	0.838745	0.359981		1.74603	0.0133195	0.497051		1.74603	0.051158	0.334213		1.74603	0.264361	0.235849
	1.85516	0.178175	0.634095		1.85516	0.466344	1		1.85516	0.562639	0.293028		1.85516	0.60768	0.272194		1.85516	0.183994	0.100895		1.85516	0.354173	0.390812		1.85516	0.426337	0.617574		1.85516	0.90069	0.437449		1.85516	0.0215273	0.706899		1.85516	0.0243306	0.50375		1.85516	0.00039913	0.509441
	1.96429	0.29706	0.521056		1.96429	0.493779	0.962054		1.96429	0.420759	0.277651		1.96429	0.65675	0.299471		1.96429	0.181173	0.111387		1.96429	0.242595	0.375817		1.96429	0.407747	0.802983		1.96429	0.928021	0.416293		1.96429	0.0741154	0.68306		1.96429	0.0401797	0.562309		1.96429	0.169331	0.621529
	2.07341	0.270021	0.598133		2.07341	0.658471	0.889334		2.07341	0.541837	0.337912		2.07341	0.585679	0.333729		2.07341	0.221761	0.261827		2.07341	0.15878	0.311471		2.07341	0.326989	0.659705		2.07341	0.716531	0.465799		2.07341	0.116235	0.650914		2.07341	0.0339185	0.538792		2.07341	0.0504454	0.504039
	2.18254	0.325343	0.764578		2.18254	0.694193	0.603122		2.18254	0.522757	0.311705		2.18254	0.42342	0.346898		2.18254	0.227533	0.442526		2.18254	0.103382	0.191899		2.18254	0.212867	0.485563		2.18254	0.717478	0.401617		2.18254	0.244909	0.343676		2.18254	0.261399	0.691403		2.18254	0.274569	0.431462
	2.29167	0.289156	0.901698		2.29167	0.708477	0.569648		2.29167	0.622573	0.443478		2.29167	0.414212	0.383047		2.29167	0.263197	0.749595		2.29167	0.0893284	0.175024		2.29167	0.227849	0.655959		2.29167	0.80597	0.490522		2.29167	0.190142	0.351525		2.29167	0.306263	0.697544		2.29167	0.384227	0.648782
	2.40079	0.232363	0.992855		2.40079	0.507113	0.59308		2.40079	0.475485	0.506077		2.40079	0.369392	0.403731		2.40079	0.194789	0.903488		2.40079	0.181645	0.312932		2.40079	0.317067	0.661034		2.40079	0.610344	0.574061		2.40079	0.167507	0.357884		2.40079	0.259148	0.618791		2.40079	0.361735	0.54254
	2.50992	0.301698	1		2.50992	0.547534	0.614459		2.50992	0.421336	0.53084		2.50992	0.369174	0.400424		2.50992	0.368695	0.951144		2.50992	0.0943758	0.357831		2.50992	0.309523	0.757825		2.50992	0.597526	0.78262		2.50992	0.183813	0.549667		2.50992	0.415363	0.641541		2.50992	0.387883	0.537961
	2.61905	0.367106	0.939411		2.61905	0.593474	0.464238		2.61905	0.536661	0.53524		2.61905	0.355497	0.459177		2.61905	0.287419	0.804837		2.61905	0.0817085	0.396432		2.61905	0.333103	0.892485		2.61905	0.54788	0.775858		2.61905	0.175424	0.600966		2.61905	0.948271	0.70694		2.61905	0.246619	0.692887
	2.72817	0.391452	0.842093		2.72817	0.59158	0.514825		2.72817	0.573373	0.583038		2.72817	0.302506	0.508347		2.72817	0.20993	0.634478		2.72817	0.136516	0.489753		2.72817	0.304379	1		2.72817	0.448491	0.848927		2.72817	0.209072	0.742937		2.72817	0.87128	0.724119		2.72817	0.464772	0.856966
	2.8373	0.462603	0.770528		2.8373	0.624066	0.5591		2.8373	0.505784	0.605936		2.8373	0.292761	0.513891		2.8373	0.36106	0.615846		2.8373	0.256002	0.52917		2.8373	0.315981	0.964595		2.8373	0.427609	0.719568		2.8373	0.333079	0.930651		2.8373	0.999134	0.720765		2.8373	0.581901	0.849306
	2.94643	0.500637	0.839407		2.94643	0.627511	0.544446		2.94643	0.597032	0.662879		2.94643	0.293719	0.650458		2.94643	0.502572	0.661544		2.94643	0.247328	0.648657		2.94643	0.386788	0.938702		2.94643	0.523554	1		2.94643	0.364567	0.647849		2.94643	1	0.851893		2.94643	0.583074	0.831472
	3.05556	0.646532	0.855338		3.05556	0.673522	0.666403		3.05556	0.754705	0.811567		3.05556	0.483388	0.684103		3.05556	0.530521	0.660337		3.05556	0.291032	0.781827		3.05556	0.418897	0.848297		3.05556	0.459736	0.975701		3.05556	0.26482	0.652554		3.05556	0.698141	1		3.05556	0.636366	1
	3.16468	0.749065	0.73194		3.16468	0.810691	0.802046		3.16468	0.737038	0.89605		3.16468	0.524821	0.84769		3.16468	0.452255	0.640632		3.16468	0.374315	0.815037		3.16468	0.470255	0.813446		3.16468	0.480922	0.862013		3.16468	0.388382	0.830934		3.16468	0.494612	0.990219		3.16468	0.53617	0.877171
	3.27381	0.708851	0.707551		3.27381	1	0.742267		3.27381	0.767707	1		3.27381	0.617174	0.888136		3.27381	0.456232	0.650927		3.27381	0.434201	0.940431		3.27381	0.578043	0.841193		3.27381	0.330076	0.87851		3.27381	0.318997	0.969838		3.27381	0.571728	0.925365		3.27381	0.775021	0.700587
	3.38294	0.678594	0.748776		3.38294	0.838849	0.658226		3.38294	0.913472	0.916652		3.38294	0.719528	0.973782		3.38294	0.540778	0.585757		3.38294	0.421146	0.949566		3.38294	0.734975	0.953609		3.38294	0.425051	0.820229		3.38294	0.221139	0.806477		3.38294	0.619062	0.805705		3.38294	0.587658	0.872831
	3.49206	0.767085	0.734129		3.49206	0.769032	0.5542		3.49206	0.954413	0.77735		3.49206	0.747685	0.952771		3.49206	0.557035	0.495353		3.49206	0.624912	1		3.49206	0.78674	0.954191		3.49206	0.545926	0.815317		3.49206	0.315066	0.915981		3.49206	0.47327	0.752496		3.49206	0.598362	0.718636
	3.60119	0.802295	0.663907		3.60119	0.986386	0.47081		3.60119	0.965361	0.753705		3.60119	0.784809	0.805224		3.60119	0.613542	0.527733		3.60119	0.661795	0.895228		3.60119	0.884928	0.810932		3.60119	0.601238	0.75002		3.60119	0.399904	1		3.60119	0.409431	0.744467		3.60119	0.631544	0.704759
	3.71032	1	0.700904		3.71032	0.810569	0.500657		3.71032	0.977121	0.66905		3.71032	0.906686	0.854076		3.71032	0.624188	0.500586		3.71032	0.78775	0.877149		3.71032	0.903825	0.75339		3.71032	0.805081	0.757786		3.71032	0.367554	0.76121		3.71032	0.228164	0.83178		3.71032	0.625438	0.627277
	3.81944	0.960872	0.488218		3.81944	0.866131	0.346563		3.81944	0.885095	0.492522		3.81944	0.747296	0.78157		3.81944	0.788067	0.441283		3.81944	0.841373	0.876059		3.81944	0.93903	0.71485		3.81944	0.887448	0.789866		3.81944	0.416392	0.676746		3.81944	0.290436	0.764029		3.81944	0.71654	0.521314
	3.92857	0.826542	0.414215		3.92857	0.844151	0.338007		3.92857	0.962782	0.459757		3.92857	0.92552	0.792164		3.92857	0.952344	0.400728		3.92857	0.912889	0.832399		3.92857	0.985931	0.687772		3.92857	0.887619	0.844216		3.92857	0.537448	0.671436		3.92857	0.154622	0.644654		3.92857	0.582063	0.497099
	4.0377	0.768397	0.382831		4.0377	0.948412	0.205095		4.0377	1	0.479165		4.0377	1	0.870413		4.0377	0.864001	0.422821		4.0377	1	0.656915		4.0377	1	0.597416		4.0377	1	0.710807		4.0377	0.631103	0.64558		4.0377	0.392536	0.426777		4.0377	0.367245	0.455688
	4.14683	0.73146	0.317873		4.14683	0.755905	0.342045		4.14683	0.940021	0.424792		4.14683	0.87464	0.942494		4.14683	0.881305	0.55547		4.14683	0.97696	0.6291		4.14683	0.912122	0.564069		4.14683	0.812607	0.392819		4.14683	0.639401	0.38839		4.14683	0.269472	0.581866		4.14683	0.401385	0.394968
	4.25595	0.778276	0.196068		4.25595	0.544049	0.380696		4.25595	0.945861	0.370084		4.25595	0.818142	0.942989		4.25595	1	0.714228		4.25595	0.948119	0.653578		4.25595	0.71081	0.516543		4.25595	0.681977	0.323747		4.25595	0.703021	0.156815		4.25595	0.267716	0.392003		4.25595	0.343945	0.181635
	4.36508	0.6902	0.232477		4.36508	0.438859	0.310727		4.36508	0.897569	0.35689		4.36508	0.70719	0.962484		4.36508	0.679279	0.909615		4.36508	0.770592	0.500434		4.36508	0.556935	0.408698		4.36508	0.672119	0.314384		4.36508	0.832566	0.479407		4.36508	0.0632736	0.314081		4.36508	0.592612	0.0669862
	4.47421	0.594446	0.261533		4.47421	0.418042	0.337597		4.47421	0.681276	0.395757		4.47421	0.491501	1		4.47421	0.378145	1		4.47421	0.432262	0.235572		4.47421	0.516635	0.472869		4.47421	0.644986	0.194321		4.47421	1	0.686271		4.47421	0.0921749	0.259162
	4.58333	0.372485	0.239044		4.58333	0.223926	0.448179		4.58333	0.394488	0.346644		4.58333	0.199687	0.99898		4.58333	0.221114	0.829229		4.58333	0.143981	0.149206		4.58333	0.471445	0.413463		4.58333	0.497091	0.199278						4.58333	0	0.204649
	4.69246	0.218675	0.233313		4.69246	0.0341356	0.205135		4.69246	0.303611	0.309883		4.69246	0.239718	0.961474		4.69246	0.15114	0.574468		4.69246	0.0969374	0		4.69246	0.36258	0.614362		4.69246	0.313326	0.148368						4.69246	0.134481	0.329039
	4.80159	0.189267	0.163698		4.80159	0.127019	0.165726		4.80159	0.165967	0.35071		4.80159	0.211356	0.7305										4.80159	0.261684	0.612265		4.80159	0.271166	0.172117
	4.91071	0.103895	0.0873169		4.91071	0.101353	0.0898093		4.91071	0.0994254	0.260572		4.91071	0.119807	0.658419										4.91071	0.209599	0.701913
					5.01984	0	0		5.01984	0.0515245	0.325294		5.01984	0.145827	0.404869
line profiles normalised for overall min-max
max		341.229	390.104			311.045	404.661			321.189	413.911			309.877	411.482			376.464	437.112			363.101	415.977			377.822	438.68			409.667	448.525			395.036	378.019			358.165	398.954			318.628	386.061
min		239.896	289.608			253.448	313.991			248.197	297.567			247.17	310.484			276.14	325.313			270.698	316.467			278.735	335.643			318.641	313.954			284.897	336.191			302.856	319.015			274.783	341.596
max		409.667	448.525
min		239.896	289.608
max		409.667	448.525			409.667	448.525			409.667	448.525			409.667	448.525			409.667	448.525			409.667	448.525			409.667	448.525			409.667	448.525			409.667	448.525			409.667	448.525			409.667	448.525
min		239.896	289.608			239.896	289.608			239.896	289.608			239.896	289.608			239.896	289.608			239.896	289.608			239.896	289.608			239.896	289.608			239.896	289.608			239.896	289.608			239.896	289.608
	t12				t13				t14				t15				t16				t17				t18				t19				t20				t21				t22
		Rab5	Rab11			Rab5	Rab11			Rab5	Rab11			Rab5	Rab11			Rab5	Rab11			Rab5	Rab11			Rab5	Rab11			Rab5	Rab11			Rab5	Rab11			Rab5	Rab11			Rab5	Rab11
	0	0.0489659	0.0361887		0	0.0853908	0.201822		0	0.0488952	0.270122		0	0.0841185	0.387806		0	0.308327	0.569599		0	0.23903	0.222482		0	0.324909	0.572569		0	0.567867	0.213627		0	0.806845	0.369509		0	0.415566	0.336511		0	0.312942	0.369305
	0.10913	0.0165105	0		0.10913	0.0834918	0.194749		0.10913	0.0503395	0.235374		0.10913	0.0428459	0.409264		0.10913	0.331558	0.478136		0.10913	0.25659	0.21849		0.10913	0.252681	0.452739		0.10913	0.540957	0.207058		0.10913	0.667557	0.416755		0.10913	0.487441	0.369445		0.10913	0.390949	0.38821
	0.21825	0	0.0715657		0.21825	0.142896	0.177602		0.21825	0.059857	0.241227		0.21825	0.0781045	0.430929		0.21825	0.411519	0.384685		0.21825	0.218766	0.211825		0.21825	0.22877	0.3887		0.21825	0.500253	0.212551		0.21825	0.642795	0.356744		0.21825	0.518043	0.380182		0.21825	0.425882	0.385809
	0.32738	0.00288624	0.0849437		0.32738	0.151337	0.164853		0.32738	0.0514263	0.231095		0.32738	0.0921399	0.411938		0.32738	0.381849	0.370709		0.32738	0.230749	0.192777		0.32738	0.244678	0.333042		0.32738	0.518443	0.219335		0.32738	0.727732	0.293129		0.32738	0.504808	0.353218		0.32738	0.417939	0.411171
	0.43651	0.0140012	0.0880082		0.43651	0.148281	0.210029		0.43651	0.0565938	0.183882		0.43651	0.0618385	0.361119		0.43651	0.293177	0.387353		0.43651	0.250052	0.266968		0.43651	0.232424	0.28968		0.43651	0.560348	0.186254		0.43651	0.649321	0.402189		0.43651	0.501635	0.264615		0.43651	0.463756	0.356511
	0.54563	0.0513161	0.131968		0.54563	0.154575	0.257777		0.54563	0.0786676	0.227848		0.54563	0.0549734	0.279511		0.54563	0.213487	0.435454		0.54563	0.232671	0.342848		0.54563	0.261228	0.290095		0.54563	0.533033	0.153199		0.54563	0.537665	0.478759		0.54563	0.520073	0.185046		0.54563	0.4518	0.371452
	0.65476	0.0994692	0.159316		0.65476	0.129047	0.254803		0.65476	0.0841892	0.199431		0.65476	0.101878	0.223582		0.65476	0.231182	0.39963		0.65476	0.191209	0.405702		0.65476	0.262976	0.365877		0.65476	0.497156	0.193604		0.65476	0.431976	0.466774		0.65476	0.496892	0.188208		0.65476	0.371642	0.367163
	0.76389	0.0576835	0.0841508		0.76389	0.159344	0.216116		0.76389	0.0718314	0.100644		0.76389	0.129024	0.131364		0.76389	0.263072	0.366141		0.76389	0.181431	0.493193		0.76389	0.253413	0.396226		0.76389	0.551976	0.236828		0.76389	0.359307	0.425561		0.76389	0.48191	0.21605		0.76389	0.342678	0.37309
	0.87302	0.0490719	0.166093		0.87302	0.152717	0.254153		0.87302	0.106093	0.0944392		0.87302	0.0835819	0.146095		0.87302	0.230304	0.423385		0.87302	0.206754	0.681357		0.87302	0.238958	0.455395		0.87302	0.493871	0.190961		0.87302	0.330462	0.437919		0.87302	0.519095	0.23823		0.87302	0.284472	0.399312
	0.98214	0.0393176	0.129483		0.98214	0.141884	0.280645		0.98214	0.0894586	0.053443		0.98214	0.0830712	0.210399		0.98214	0.272567	0.387888		0.98214	0.244374	0.654608		0.98214	0.261227	0.476072		0.98214	0.46383	0.232027		0.98214	0.349906	0.397678		0.98214	0.52028	0.22596		0.98214	0.205494	0.376892
	1.09127	0.0072745	0.15408		1.09127	0.126172	0.252459		1.09127	0.116117	0.0500827		1.09127	0.0584746	0.182989		1.09127	0.398171	0.381759		1.09127	0.28343	0.661728		1.09127	0.310569	0.388448		1.09127	0.52327	0.261004		1.09127	0.381413	0.362732		1.09127	0.539649	0.216978		1.09127	0.207283	0.369987
	1.2004	0.0353535	0.148134		1.2004	0.157207	0.308849		1.2004	0.136827	0.0864476		1.2004	0.108555	0.185889		1.2004	0.376648	0.377392		1.2004	0.306832	0.6994		1.2004	0.306829	0.404041		1.2004	0.483574	0.311496		1.2004	0.351049	0.372314		1.2004	0.566403	0.309238		1.2004	0.233486	0.353538
	1.30952	0.0592739	0.157183		1.30952	0.162539	0.445795		1.30952	0.197964	0.0871524		1.30952	0.170565	0.239005		1.30952	0.331829	0.276761		1.30952	0.297999	0.64612		1.30952	0.324653	0.413662		1.30952	0.547317	0.32965		1.30952	0.286521	0.378409		1.30952	0.513353	0.312401		1.30952	0.216963	0.327142
	1.41865	0.0814449	0.160889		1.41865	0.137165	0.420533		1.41865	0.21102	0.134529		1.41865	0.187826	0.223897		1.41865	0.401817	0.285885		1.41865	0.357611	0.504772		1.41865	0.364915	0.384459		1.41865	0.6225	0.364008		1.41865	0.289584	0.339645		1.41865	0.48374	0.326465		1.41865	0.220008	0.406035
	1.52778	0.065064	0.210821		1.52778	0.153328	0.476869		1.52778	0.283326	0.0985546		1.52778	0.167676	0.222462		1.52778	0.414858	0.224677		1.52778	0.367495	0.526474		1.52778	0.445257	0.387164		1.52778	0.723223	0.452205		1.52778	0.300599	0.341612		1.52778	0.470826	0.34291		1.52778	0.276323	0.430889
	1.6369	0.0651936	0.260192		1.6369	0.231731	0.542973		1.6369	0.249946	0.138991		1.6369	0.191145	0.218384		1.6369	0.406535	0.276868		1.6369	0.367031	0.544805		1.6369	0.498898	0.432729		1.6369	0.872135	0.497562		1.6369	0.265069	0.347421		1.6369	0.461132	0.400227		1.6369	0.340984	0.399054
	1.74603	0.101224	0.334829		1.74603	0.23761	0.655318		1.74603	0.254882	0.219423		1.74603	0.210365	0.240723		1.74603	0.407089	0.279391		1.74603	0.362304	0.474223		1.74603	0.475698	0.545543		1.74603	0.91354	0.458032		1.74603	0.27371	0.423955		1.74603	0.387518	0.353163		1.74603	0.273768	0.393132
	1.85516	0.106349	0.400989		1.85516	0.238039	0.72398		1.85516	0.2908	0.26461		1.85516	0.267298	0.304354		1.85516	0.322216	0.295657		1.85516	0.3742	0.413731		1.85516	0.477602	0.690096		1.85516	0.946753	0.523632		1.85516	0.279034	0.479187		1.85516	0.378778	0.438444		1.85516	0.205597	0.469682
	1.96429	0.177309	0.329505		1.96429	0.247347	0.70233		1.96429	0.229799	0.253352		1.96429	0.285422	0.32169		1.96429	0.320549	0.303039		1.96429	0.31347	0.404341		1.96429	0.466752	0.81031		1.96429	0.961407	0.505717		1.96429	0.313151	0.472913		1.96429	0.383941	0.467901		1.96429	0.249226	0.501044
	2.07341	0.16117	0.378248		2.07341	0.30322	0.660839		2.07341	0.281856	0.29747		2.07341	0.259172	0.343462		2.07341	0.344534	0.408874		2.07341	0.267851	0.364049		2.07341	0.419618	0.717412		2.07341	0.848013	0.547638		2.07341	0.340476	0.464452		2.07341	0.381902	0.456071		2.07341	0.218522	0.468171
	2.18254	0.194191	0.483504		2.18254	0.31534	0.497541		2.18254	0.273652	0.278284		2.18254	0.19924	0.351831		2.18254	0.347945	0.535997		2.18254	0.237699	0.289175		2.18254	0.35301	0.604504		2.18254	0.84852	0.493289		2.18254	0.423953	0.383586		2.18254	0.456011	0.532838		2.18254	0.276405	0.447864
	2.29167	0.172591	0.570216		2.29167	0.320186	0.478443		2.29167	0.316568	0.374755		2.29167	0.195839	0.374806		2.29167	0.36902	0.752021		2.29167	0.23005	0.278609		2.29167	0.361755	0.714983		2.29167	0.895967	0.568574		2.29167	0.388423	0.385652		2.29167	0.470628	0.535927		2.29167	0.304725	0.508669
	2.40079	0.138693	0.627862		2.40079	0.251871	0.491812		2.40079	0.253328	0.420584		2.40079	0.179284	0.387951		2.40079	0.328595	0.860286		2.40079	0.280296	0.364964		2.40079	0.413827	0.718274		2.40079	0.791078	0.639315		2.40079	0.373738	0.387325		2.40079	0.455278	0.496313		2.40079	0.298916	0.478943
	2.50992	0.180078	0.63238		2.50992	0.265584	0.50401		2.50992	0.230047	0.438713		2.50992	0.179204	0.385849		2.50992	0.431363	0.893812		2.50992	0.232797	0.393079		2.50992	0.409424	0.78103		2.50992	0.784205	0.815923		2.50992	0.384317	0.437803		2.50992	0.506171	0.507756		2.50992	0.30567	0.477662
	2.61905	0.219118	0.594065		2.61905	0.28117	0.418301		2.61905	0.27963	0.441935		2.61905	0.174152	0.423189		2.61905	0.383334	0.790885		2.61905	0.225903	0.41725		2.61905	0.423186	0.86834		2.61905	0.757587	0.810197		2.61905	0.378875	0.451305		2.61905	0.679784	0.540653		2.61905	0.269186	0.52101
	2.72817	0.23365	0.532523		2.72817	0.280527	0.447164		2.72817	0.295415	0.476928		2.72817	0.154579	0.454438		2.72817	0.337543	0.671036		2.72817	0.255734	0.475685		2.72817	0.406422	0.938049		2.72817	0.704297	0.872072		2.72817	0.400704	0.488673		2.72817	0.654702	0.549295		2.72817	0.325527	0.566919
	2.8373	0.276119	0.487267		2.8373	0.291548	0.472425		2.8373	0.266355	0.493692		2.8373	0.15098	0.457962		2.8373	0.426851	0.657928		2.8373	0.320767	0.500367		2.8373	0.413193	0.915094		2.8373	0.693101	0.76253		2.8373	0.481153	0.53808		2.8373	0.696355	0.547608		2.8373	0.355777	0.564775
	2.94643	0.29882	0.530824		2.94643	0.292717	0.464064		2.94643	0.305587	0.53538		2.94643	0.151334	0.544756		2.94643	0.510475	0.690077		2.94643	0.316046	0.575188		2.94643	0.454519	0.898305		2.94643	0.744544	1		2.94643	0.501581	0.463645		2.94643	0.696637	0.613568		2.94643	0.35608	0.559785
	3.05556	0.385902	0.540899		3.05556	0.308327	0.533646		3.05556	0.373377	0.644236		3.05556	0.22139	0.566138		3.05556	0.526992	0.689228		3.05556	0.339833	0.658576		3.05556	0.47326	0.83969		3.05556	0.710327	0.979423		3.05556	0.43687	0.464884		3.05556	0.598296	0.688069		3.05556	0.369843	0.606939
	3.16468	0.447102	0.462864		3.16468	0.354863	0.611037		3.16468	0.365782	0.706086		3.16468	0.236693	0.670105		3.16468	0.480741	0.675365		3.16468	0.385163	0.679372		3.16468	0.503236	0.817093		3.16468	0.721686	0.883153		3.16468	0.517031	0.511834		3.16468	0.531989	0.683149		3.16468	0.343966	0.572572
	3.27381	0.423099	0.447441		3.27381	0.419088	0.576931		3.27381	0.378968	0.782188		3.27381	0.270804	0.69581		3.27381	0.483091	0.682608		3.27381	0.417757	0.757891		3.27381	0.566146	0.835084		3.27381	0.640807	0.897122		3.27381	0.472018	0.548394		3.27381	0.557112	0.650526		3.27381	0.405652	0.523164
	3.38294	0.405039	0.473511		3.38294	0.364416	0.528981		3.38294	0.441639	0.721169		3.38294	0.30861	0.750241		3.38294	0.533053	0.63676		3.38294	0.410652	0.763611		3.38294	0.657739	0.907971		3.38294	0.69173	0.84777		3.38294	0.408532	0.505397		3.38294	0.572533	0.590335		3.38294	0.357264	0.571357
	3.49206	0.457857	0.464249		3.49206	0.34073	0.469629		3.49206	0.459241	0.619185		3.49206	0.31901	0.736888		3.49206	0.54266	0.573161		3.49206	0.521557	0.795191		3.49206	0.687952	0.908348		3.49206	0.756539	0.84361		3.49206	0.469467	0.534218		3.49206	0.525036	0.563569		3.49206	0.360028	0.528214
	3.60119	0.478874	0.419842		3.60119	0.41447	0.422051		3.60119	0.463948	0.601874		3.60119	0.332722	0.643116		3.60119	0.576052	0.59594		3.60119	0.541632	0.729585		3.60119	0.74526	0.815463		3.60119	0.786196	0.788317		3.60119	0.524506	0.556333		3.60119	0.504238	0.55953		3.60119	0.368598	0.524332
	3.71032	0.59688	0.443238		3.71032	0.354822	0.43908		3.71032	0.469004	0.539898		3.71032	0.377738	0.674163		3.71032	0.582343	0.576842		3.71032	0.610187	0.718264		3.71032	0.756289	0.778155		3.71032	0.895491	0.794893		3.71032	0.503519	0.493482		3.71032	0.445184	0.603451		3.71032	0.367021	0.502652
	3.81944	0.573525	0.30874		3.81944	0.373672	0.351162		3.81944	0.429438	0.410661		3.81944	0.318866	0.628083		3.81944	0.679185	0.535122		3.81944	0.639372	0.717582		3.81944	0.776837	0.753167		3.81944	0.939653	0.822058		3.81944	0.535203	0.471251		3.81944	0.465471	0.56937		3.81944	0.390549	0.473004
	3.92857	0.493346	0.261942		3.92857	0.366215	0.346281		3.92857	0.462839	0.386674		3.92857	0.384695	0.634816		3.92857	0.776262	0.506591		3.92857	0.678297	0.690243		3.92857	0.80421	0.73561		3.92857	0.939745	0.868082		3.92857	0.613738	0.469853		3.92857	0.421225	0.509322		3.92857	0.355819	0.466229
	4.0377	0.458641	0.242095		4.0377	0.401586	0.270447		4.0377	0.478841	0.400882		4.0377	0.412205	0.684546		4.0377	0.724057	0.522134		4.0377	0.72571	0.580359		4.0377	0.812422	0.677026		4.0377	1	0.755111		4.0377	0.674496	0.463048		4.0377	0.498734	0.399725		4.0377	0.30034	0.454642
	4.14683	0.436593	0.201017		4.14683	0.336276	0.348584		4.14683	0.453053	0.361075		4.14683	0.365902	0.730356		4.14683	0.734282	0.615453		4.14683	0.713169	0.562942		4.14683	0.761131	0.655405		4.14683	0.899525	0.485839		4.14683	0.67988	0.395355		4.14683	0.458641	0.477738		4.14683	0.309157	0.437653
	4.25595	0.464537	0.123989		4.25595	0.264402	0.370637		4.25595	0.455564	0.321023		4.25595	0.345034	0.730671		4.25595	0.804424	0.727141		4.25595	0.697472	0.578269		4.25595	0.643636	0.62459		4.25595	0.829486	0.427349		4.25595	0.721153	0.334403		4.25595	0.458069	0.382233		4.25595	0.294322	0.377963
	4.36508	0.411966	0.147014		4.36508	0.228715	0.330716		4.36508	0.434801	0.311364		4.36508	0.304053	0.743061		4.36508	0.614898	0.864596		4.36508	0.600847	0.482374		4.36508	0.553826	0.554667		4.36508	0.8242	0.41942		4.36508	0.805195	0.419311		4.36508	0.391465	0.343036		4.36508	0.358543	0.345885
	4.47421	0.354813	0.165388		4.47421	0.221652	0.346047		4.47421	0.341807	0.339819		4.47421	0.224386	0.766903		4.47421	0.436947	0.928183		4.47421	0.416702	0.316523		4.47421	0.530305	0.596274		4.47421	0.809652	0.317751		4.47421	0.913818	0.473758		4.47421	0.400881	0.315411
	4.58333	0.222329	0.151167		4.58333	0.155796	0.409139		4.58333	0.218503	0.303863		4.58333	0.116602	0.766255		4.58333	0.344151	0.808044		4.58333	0.259797	0.262442		4.58333	0.50393	0.557757		4.58333	0.730355	0.321948						4.58333	0.370851	0.287989
	4.69246	0.130523	0.147542		4.69246	0.0914077	0.270471		4.69246	0.179431	0.27695		4.69246	0.131388	0.742419		4.69246	0.302802	0.628819		4.69246	0.234192	0.169013		4.69246	0.44039	0.688013		4.69246	0.631826	0.278837						4.69246	0.414663	0.35056
	4.80159	0.11297	0.103519		4.80159	0.12292	0.247986		4.80159	0.120252	0.306839		4.80159	0.120912	0.595625										4.80159	0.381502	0.686654		4.80159	0.609221	0.298949
	4.91071	0.0620129	0.0552175		4.91071	0.114212	0.204672		4.91071	0.0916428	0.240849		4.91071	0.0870978	0.549815										4.91071	0.351103	0.744779
					5.01984	0.0798268	0.153431		5.01984	0.071048	0.288232		5.01984	0.0967084	0.388675

[truncated: 5 more sheets: 11, 12, 13, 14, pooled]
