# Supplementary material for: A novel live-cell imaging assay reveals regulation of endosome maturation
Source: eLife. 2021 Nov 30;10:e70982. doi: 10.7554/eLife.70982 (PMC8635980; doi:10.7554/eLife.70982)
Supplement: Figure 8—source data 3. [file elife-70982-fig8-data3.xlsx]

## Sheet: exp1-endosome1
endosome 1						dMFI				%dMFI
frame #	Rab7(rim)	Rab7(background)	Rab11(rim)	Rab11(background)		Rab7	Rab11		frame #	Rab7	Rab11
77	224.71	234.488	479.07	464.687		-9.778	14.383		77	0	0.731369
78	229.653	236.476	487.587	477.081		-6.823	10.506		78	0.0777202	0.62557
79	226.561	234.391	484.48	468.246		-7.83	16.234		79	0.0512348	0.78188
80	231.875	235.29	494.485	490.496		-3.415	3.989		80	0.167355	0.447728
81	232.755	235.675	496.72	492.56		-2.92	4.16		81	0.180374	0.452395
82	227.555	228.647	490.65	490.976		-1.092	-0.326		82	0.228453	0.329977
83	227.195	228.456	472.185	471.913		-1.261	0.272		83	0.224008	0.346296
84	234.215	234.937	477.52	481.762		-0.722	-4.242		84	0.238184	0.223114
85	230.005	233.944	459.19	451.456		-3.939	7.734		85	0.153573	0.549925
86	233.025	235.139	465.795	461.496		-2.114	4.299		86	0.201573	0.456188
87	231.045	237.337	479.37	472.127		-6.292	7.243		87	0.0916862	0.536526
88	236.885	235.5	471.12	461.532		1.385	9.588		88	0.293601	0.600518
89	237.465	238.484	474.945	462.96		-1.019	11.985		89	0.230373	0.66593
90	238.583	232.281	496.162	481.604		6.302	14.558		90	0.422924	0.736144
91	232.515	225.934	479.79	476.645		6.581	3.145		91	0.430262	0.424696
92	234.367	228.492	484.811	476.226		5.875	8.585		92	0.411694	0.573148
93	227.96	219.766	448.67	431.175		8.194	17.495		93	0.472686	0.816291
94	225.735	220.77	446.01	434.004		4.965	12.006		94	0.387759	0.666503
95	220.911	217.847	448.151	443.677		3.064	4.474		95	0.337761	0.460963
96	227.91	217.865	448.44	449.631		10.045	-1.191		96	0.52137	0.306372
97	220.15	210.488	445.905	438.198		9.662	7.707		97	0.511296	0.549188
98	224.05	217.857	450.145	436.147		6.193	13.998		98	0.420057	0.720862
99	227.12	215.714	451.955	446.008		11.406	5.947		99	0.557166	0.50116
100	227.464	214.419	439.51	433.823		13.045	5.687		100	0.600274	0.494065
101	230.03	216.647	454.115	433.98		13.383	20.135		101	0.609163	0.888334
102	234.705	217.71	435.73	430.19		16.995	5.54		102	0.704163	0.490053
103	231.4	219.123	439.24	428.123		12.277	11.117		103	0.580074	0.642243
104	232.73	218.492	430.495	426.361		14.238	4.134		104	0.631651	0.451685
105	232.897	217.877	426.324	421.604		15.02	4.72		105	0.652219	0.467676
106	234.348	217.915	428.098	416.562		16.433	11.536		106	0.689382	0.653677
107	232.24	220.119	437.672	422.431		12.121	15.241		107	0.575971	0.754782
108	234.775	219.988	439.265	426.204		14.787	13.061		108	0.64609	0.695293
109	227.858	213.827	431.936	416.746		14.031	15.19		109	0.626207	0.753391
110	229.162	217.246	424.946	415.681		11.916	9.265		110	0.570579	0.591704
111	235.358	222.742	450.735	442.296		12.616	8.439		111	0.58899	0.569164
112	235.049	221.054	435.877	419.665		13.995	16.212		112	0.62526	0.78128
113	240.279	223.496	429.877	424.919		16.783	4.958		113	0.698588	0.474171
114	238.66	224.383	432.24	420.367		14.277	11.873		114	0.632677	0.662874
115	239.26	229.18	458.125	447.086		10.08	11.039		115	0.52229	0.640115
116	239.86	229.266	443.86	445.476		10.594	-1.616		116	0.535809	0.294774
117	240.495	227.448	450.515	453.718		13.047	-3.203		117	0.600326	0.251467
118	240.23	229.774	447.57	459.988		10.456	-12.418		118	0.53218	0
119	237.362	227.198	450.408	455.815		10.164	-5.407		119	0.5245	0.191322
120	232.797	222.964	413.479	420.581		9.833	-7.102		120	0.515794	0.145068
121	233.27	218.976	417.265	425.593		14.294	-8.328		121	0.633124	0.111611
122	229.913	217.097	415.694	424.754		12.816	-9.06		122	0.594251	0.091636
123	226.578	211.008	444.828	424.847		15.57	19.981		123	0.666684	0.884132
124	228.57	209.325	437.125	425.194		19.245	11.931		124	0.763341	0.664456
125	235.38	213.921	451.435	438.274		21.459	13.161		125	0.821572	0.698022
126	235.347	214.363	459.158	451.851		20.984	7.307		126	0.809079	0.538273
127	231.97	213.367	469.85	461.625		18.603	8.225		127	0.746456	0.563324
128	234.265	211.363	464.18	456.84		22.902	7.34		128	0.859525	0.539173
129	228.32	206.107	446.185	442.992		22.213	3.193		129	0.841403	0.426006
130	222.235	203.641	440.903	435.089		18.594	5.814		130	0.746219	0.49753
131	212.49	199.694	432.454	422.734		12.796	9.72		131	0.593725	0.604121
132	216.446	205.396	417.603	429.196		11.05	-11.593		132	0.547803	0.0225133
133	216.17	205.201	421.622	422.078		10.969	-0.456		133	0.545672	0.326429
134	215.021	204.066	401.059	409.791		10.955	-8.732		134	0.545304	0.100587
135	216.926	203.467	413.984	419.84		13.459	-5.856		135	0.611162	0.179069
136	217.5	204.648	419.351	419.004		12.852	0.347		136	0.595197	0.348342
137	221.525	203.964	415.565	415.972		17.561	-0.407		137	0.71905	0.327766
138	223.235	202.637	428.056	426.149		20.598	1.907		138	0.798927	0.390913
139	221.653	204.629	410.684	416.637		17.024	-5.953		139	0.704926	0.176422
140	220.615	201.401	432.755	422.988		19.214	9.767		140	0.762526	0.605403
141	219.53	198.94	399.075	401.357		20.59	-2.282		141	0.798716	0.2766
142	220.33	204.623	423.335	414.583		15.707	8.752		142	0.670287	0.577705
143	222.72	204.41	434.9	421.082		18.31	13.818		143	0.73875	0.71595
144	221.255	202.121	431.78	421.227		19.134	10.553		144	0.760422	0.626852
145	222.66	201.414	449.92	436.285		21.246	13.635		145	0.81597	0.710956
146	219.29	199.602	441.895	435.105		19.688	6.79		146	0.774993	0.524164
147	223.93	204.254	451.565	456.219		19.676	-4.654		147	0.774677	0.211871
148	223.51	200.792	454.431	448.938		22.718	5.493		148	0.854686	0.488771
149	224.358	199.545	459.514	447.172		24.813	12.342		149	0.909787	0.675672
150	225.212	199.41	462.91	438.683		25.802	24.227		150	0.935799	1
151	224.722	199.261	474.66	460.388		25.461	14.272		151	0.92683	0.728339
152	225.019	200.076	467.731	465.068		24.943	2.663		152	0.913206	0.411543
153	223.721	200.117	450.389	443.481		23.604	6.908		153	0.877988	0.527384
154	224.218	197.574	484.167	461.099		26.644	23.068		154	0.957944	0.968372
155	224.458	199.577	471.829	454.651		24.881	17.178		155	0.911575	0.807641
156	222.264	197.629	454.574	440.382		24.635	14.192		156	0.905105	0.726156
157	223.917	197.952	432.685	425.728		25.965	6.957		157	0.940086	0.528722
158	220.106	195.585	442.009	432.221		24.521	9.788		158	0.902107	0.605976
159	218.971	198.015	470.5	463.981		20.956	6.519		159	0.808343	0.516769
160	217.48	199.185	454.995	450.519		18.295	4.476		160	0.738355	0.461018
161	219.304	202.869	446.603	434.438		16.435	12.165		161	0.689435	0.670842
162	224.958	199.933	433.462	426.571		25.025	6.891		162	0.915363	0.52692
163	223.915	199.451	423.071	416.522		24.464	6.549		163	0.900608	0.517588
164	225.802	199.112	432.722	414.668		26.69	18.054		164	0.959154	0.831546
165	224.618	199.414	421.618	423.392		25.204	-1.774		165	0.92007	0.290463
166	230.598	202.522	440.116	420.605		28.076	19.511		166	0.995608	0.871306
167	226.518	201.68	428.041	419.18		24.838	8.861		167	0.910444	0.580679
168	223.683	195.558	416.701	406.728		28.125	9.973		168	0.996896	0.611025
169	216.531	192.007	424.714	413.185		24.524	11.529		169	0.902186	0.653486
170	216.196	187.953	418.826	399.554		28.243	19.272		170	1	0.864784
171	217.862	190.486	422.335	402.692		27.376	19.643		171	0.977197	0.874908
172	216.114	190.868	409.395	393.39		25.246	16.005		172	0.921175	0.775631
173	215.809	190.746	415.986	398.496		25.063	17.49		173	0.916362	0.816155
174	212.67	187.08	410.085	392.638		25.59	17.447		174	0.930223	0.814982
175	211.759	187.32	413.086	403.301		24.439	9.785		175	0.89995	0.605894
176	208.945	184.232	406.077	399.382		24.713	6.695		176	0.907157	0.521572
177	208.132	185.967	419.127	403.199		22.165	15.928		177	0.840141	0.77353
178	211.227	187.857	443.486	424.151		23.37	19.335		178	0.871834	0.866503
179	207.06	182.636	412.579	411.368		24.424	1.211		179	0.899556	0.37192
180	205.463	180.482	413.963	408.059		24.981	5.904		180	0.914205	0.499986
181	207.736	180.107	412.972	400.879		27.629	12.093		181	0.983851	0.668877
182	201.625	177.868	403.958	387.853		23.757	16.105		182	0.882013	0.77836
183	199.981	177.717	404.505	387.577		22.264	16.928		183	0.842745	0.800819
184	198.75	177.522	420.005	402.316		21.228	17.689		184	0.815497	0.821585
185	195.555	175.026	412.714	390.298		20.529	22.416		185	0.797112	0.95058
186	191.221	175.871	406.822	386.008		15.35	20.814		186	0.660898	0.906863
187	192.832	176.117	404.851	388.848		16.715	16.003		187	0.696799	0.775576
188	196.583	179.323	414.809	399.6		17.26	15.209		188	0.711133	0.753909
189	193.25	176.746	393.647	382.212		16.504	11.435		189	0.69125	0.650921
190	196.807	176.821	389.689	381.746		19.986	7.943		190	0.782831	0.555628
191	197.377	176.396	410.736	401.478		20.981	9.258		191	0.809	0.591513
192	200.396	177.963	417.585	402.616		22.433	14.969		192	0.84719	0.74736
193	197.137	178.162	407.029	394.896		18.975	12.133		193	0.75624	0.669969
194	199.858	178.085	411.505	399.892		21.773	11.613		194	0.829831	0.655778

## Sheet: exp1-endosome2
endosome 2						dMFI				%dMFI
frame #	Rab7(rim)	Rab7(background)	Rab11(rim)	Rab11(background)		Rab7	Rab11		frame #	Rab7	Rab11
39	256.408	270.979	558.788	537.587		-14.571	21.201		39	0.0140318	0.74805
40	263.92	275.602	567.952	552.34		-11.682	15.612		40	0.0612238	0.689601
41	264.219	275.984	572.089	558.851		-11.765	13.238		41	0.059868	0.664774
42	265.844	281.274	553.042	544.641		-15.43	8.401		42	0	0.614189
43	277.845	286.552	585.625	553.234		-8.707	32.391		43	0.109821	0.865073
44	286.135	290.563	598.345	575.575		-4.428	22.77		44	0.179718	0.764458
45	285.255	292.718	607.87	595.69		-7.463	12.18		45	0.130141	0.653709
46	282.245	286.277	604.475	576.073		-4.032	28.402		46	0.186187	0.823357
47	278.451	288.665	632.466	587.173		-10.214	45.293		47	0.0852037	1
48	282.123	287.8	613.358	582.354		-5.677	31.004		48	0.159316	0.850568
49	282.054	287.165	644.221	611.258		-5.111	32.963		49	0.168562	0.871055
50	301.578	302.296	654.868	639.385		-0.718	15.483		50	0.240321	0.688252
51	285.475	291.765	639.74	608.446		-6.29	31.294		51	0.149302	0.853601
52	280.309	287.7	636.01	624.208		-7.391	11.802		52	0.131318	0.649756
53	274.909	281.03	616.303	591.811		-6.121	24.492		53	0.152063	0.782466
54	271.76	278.886	636.303	610.443		-7.126	25.86		54	0.135646	0.796773
55	278.98	284.703	631.69	619.734		-5.723	11.956		55	0.158564	0.651367
56	272.172	279.365	609.289	595.954		-7.193	13.335		56	0.134552	0.665788
57	267.956	277.577	599.172	591.285		-9.621	7.887		57	0.0948904	0.608814
58	263.402	273.819	577.358	583.469		-10.417	-6.111		58	0.0818877	0.462425
59	259.642	269.523	561.828	568.608		-9.881	-6.78		59	0.0906433	0.455429
60	274.176	280.838	576.583	598.185		-6.662	-21.602		60	0.143226	0.300422
61	283.961	293.662	591.176	614.685		-9.701	-23.509		61	0.0935836	0.280479
62	289.412	299.681	642.181	662.996		-10.269	-20.815		62	0.0843053	0.308653
63	285.941	293.85	627.157	655.881		-7.909	-28.724		63	0.122856	0.225942
64	286.809	296.112	635.436	658.919		-9.303	-23.483		64	0.100085	0.280751
65	285.27	297.046	628.495	658.004		-11.776	-29.509		65	0.0596883	0.217732
66	271.461	280.731	579.186	590.488		-9.27	-11.302		66	0.100624	0.408138
67	276.118	282.854	568	587.565		-6.736	-19.565		67	0.142017	0.321725
68	269.902	279.392	566.985	585.673		-9.49	-18.688		68	0.0970303	0.330897
69	266.662	279.462	576.387	576.423		-12.8	-0.036		69	0.0429612	0.525956
70	274.054	282.715	593.201	584.031		-8.661	9.17		70	0.110572	0.622231
71	273.103	275.385	604.613	587.762		-2.282	16.851		71	0.214773	0.702558
72	269.225	273	558.485	551.865		-3.775	6.62		72	0.190385	0.595564
73	274.868	276.038	593.324	566.808		-1.17	26.516		73	0.232938	0.803633
74	281.039	280.05	554.848	543.523		0.989	11.325		74	0.268205	0.644768
75	279.132	276.731	578.49	566.7		2.401	11.79		75	0.291271	0.649631
76	273.27	268.665	529.373	530.165		4.605	-0.792		76	0.327273	0.51805
77	271.603	269.685	567.314	557.923		1.918	9.391		77	0.283381	0.624542
78	276	276.562	566.304	567.496		-0.562	-1.192		78	0.24287	0.513867
79	280.123	277.419	555.054	579.069		2.704	-24.015		79	0.29622	0.275188
80	281.49	276.458	586.279	593.858		5.032	-7.579		80	0.334248	0.447073
81	291.206	285.888	578.314	603.262		5.318	-24.948		81	0.33892	0.265431
82	288.431	278.238	615.613	603.531		10.193	12.082		82	0.418553	0.652685
83	284.765	273.854	587.76	594.273		10.911	-6.513		83	0.430282	0.458221
84	278.99	271.915	576.304	573.765		7.075	2.539		84	0.367621	0.552885
85	291.877	273.481	600.476	574.224		18.396	26.252		85	0.55255	0.800872
86	294.094	277.201	607.396	582.672		16.893	24.724		86	0.527998	0.784893
87	290.505	276.526	559.939	567.623		13.979	-7.684		87	0.480398	0.445975
88	293.519	282.989	578.349	584.172		10.53	-5.823		88	0.424058	0.465437
89	294.717	280.851	565.292	581.746		13.866	-16.454		89	0.478552	0.354259
90	300.014	288.638	607.901	621.354		11.376	-13.453		90	0.437878	0.385643
91	291.443	278.937	574.967	578.47		12.506	-3.503		91	0.456336	0.489699
92	301.783	286.093	587.358	594.825		15.69	-7.467		92	0.508347	0.448244
93	289.689	275.34	565.198	568.388		14.349	-3.19		93	0.486442	0.492972
94	292.071	277.496	556.189	560.175		14.575	-3.986		94	0.490134	0.484648
95	289.151	274.922	540.5	556.97		14.229	-16.47		95	0.484482	0.354092
96	290.307	272.903	553.519	564.97		17.404	-11.451		96	0.536346	0.40658
97	296.524	272.59	549	556.563		23.934	-7.563		97	0.643013	0.44724
98	295.273	273.004	554.409	565.199		22.269	-10.79		98	0.615816	0.413493
99	294.5	273.129	551.141	558.577		21.371	-7.436		99	0.601147	0.448568
100	292.505	265.926	536.542	547.294		26.579	-10.752		100	0.68622	0.41389
101	295.231	269.882	536.648	555.949		25.349	-19.301		101	0.666128	0.324486
102	288.704	268.287	531.977	543.412		20.417	-11.435		102	0.585563	0.406747
103	299.463	277.779	527.329	554.456		21.684	-27.127		103	0.60626	0.242643
104	299.199	273.985	512.583	537.71		25.214	-25.127		104	0.663922	0.263559
105	287.204	266.746	541.056	544.665		20.458	-3.609		105	0.586233	0.48859
106	287.028	263.537	519.222	542.679		23.491	-23.457		106	0.635777	0.281023
107	286.278	265.257	527.505	543.184		21.021	-15.679		107	0.595429	0.362364
108	288.15	260.232	560.409	578.485		27.918	-18.076		108	0.708092	0.337297
109	282.205	257.86	518.9	538.445		24.345	-19.545		109	0.649727	0.321934
110	281.768	256.298	532.891	545.188		25.47	-12.297		110	0.668104	0.397733
111	282.879	256.454	537.946	541.057		26.425	-3.111		111	0.683704	0.493798
112	282.705	255.907	507.683	526.943		26.798	-19.26		112	0.689797	0.324915
113	279.763	258.571	498.853	515.643		21.192	-16.79		113	0.598223	0.350746
114	278.982	259.654	501.772	526.061		19.328	-24.289		114	0.567774	0.272322
115	289.228	267.9	538.455	564.846		21.328	-26.391		115	0.600444	0.25034
116	283.683	267.623	521.357	567.736		16.06	-46.379		116	0.514391	0.0413085
117	289.915	267.739	524.451	546.638		22.176	-22.187		117	0.614296	0.294305
118	289.5	271.331	517.85	553.224		18.169	-35.374		118	0.548842	0.156397
119	290.065	272.967	493.963	541.64		17.098	-47.677		119	0.531347	0.0277342
120	275.849	266.119	458.335	508.664		9.73	-50.329		120	0.41099	0
121	271.712	265.53	471.981	514.66		6.182	-42.679		121	0.353033	0.0800025
122	269.745	257.963	484.099	525.343		11.782	-41.244		122	0.44451	0.0950095
123	283.487	244.239	504.326	507.914		39.248	-3.588		123	0.893169	0.48881
124	286.085	241.886	500.594	518.386		44.199	-17.792		124	0.974044	0.340267
125	293.853	251.364	518.759	542.221		42.489	-23.462		125	0.946111	0.280971
126	296.192	252.164	506.518	526.814		44.028	-20.296		126	0.97125	0.31408
127	295.54	253.214	531.366	542.064		42.326	-10.698		127	0.943448	0.414455
128	299.152	253.364	519.058	527.382		45.788	-8.324		128	1	0.439282
129	285.808	243.989	509.629	498.793		41.819	10.836		129	0.935166	0.639654
130	281.022	240.443	474.518	485.021		40.579	-10.503		130	0.914911	0.416494
131	277.71	234.564	470.96	479.421		43.146	-8.461		131	0.956843	0.437849
132	272.299	239.612	463.107	487.703		32.687	-24.596		132	0.785994	0.269112
133	268.429	232.014	465.536	478.768		36.415	-13.232		133	0.846891	0.387955
134	264.469	231.786	458.29	474.217		32.683	-15.927		134	0.785929	0.359771
135	266.29	232.297	464.027	479.207		33.993	-15.18		135	0.807328	0.367583
136	268.147	231.101	456.469	479.754		37.046	-23.285		136	0.857199	0.282822
137	266.045	231.114	477.064	496.081		34.931	-19.017		137	0.82265	0.327456
138	266.927	232.092	481.764	497.849		34.835	-16.085		138	0.821082	0.358118
139	270.315	232.132	490.963	494.037		38.183	-3.074		139	0.875772	0.494185
140	269.164	232.783	479.795	497.875		36.381	-18.08		140	0.846336	0.337255
141	263.527	226.463	462.241	462.445		37.064	-0.204		141	0.857493	0.524199
142	261.218	227.754	463.55	464.989		33.464	-1.439		142	0.798687	0.511284
143	258.714	226.522	456.559	473.765		32.192	-17.206		143	0.777908	0.346395
144	257.395	222.919	452.95	464.658		34.476	-11.708		144	0.815218	0.403892
145	257.559	224.18	474.7	481.919		33.379	-7.219		145	0.797298	0.450838
146	252.836	222.07	466.345	465.066		30.766	1.279		146	0.754615	0.539708
147	255.495	224.772	486.845	484.805		30.723	2.04		147	0.753912	0.547667
148	256.332	222.18	508.759	495.32		34.152	13.439		148	0.809925	0.666876
149	256.995	226.873	486.59	487.414		30.122	-0.824		149	0.744095	0.517716
150	248.024	223.455	487.856	501.886		24.569	-14.03		150	0.653386	0.379609
151	247.444	219.335	487.852	503.691		28.109	-15.839		151	0.711212	0.360691
152	245.972	214.888	478.123	492.451		31.084	-14.328		152	0.759809	0.376493
153	246.915	217.698	478.179	484.679		29.217	-6.5		153	0.729312	0.458357
154	244.368	214.134	475.858	480.668		30.234	-4.81		154	0.745924	0.476031
155	246.868	218.631	474.943	471.739		28.237	3.204		155	0.713303	0.55984
156	240.226	216.504	477.146	469.138		23.722	8.008		156	0.63955	0.610079
157	237.221	215.242	455.399	463.701		21.979	-8.302		157	0.611078	0.439512
158	237.212	214.739	452.149	457.845		22.473	-5.696		158	0.619148	0.466765
159	237.12	214.057	452.077	459.86		23.063	-7.783		159	0.628786	0.444939
160	239.024	210.78	439.712	448.451		28.244	-8.739		160	0.713418	0.434942
161	238.206	214.673	455.475	462.877		23.533	-7.402		161	0.636463	0.448924
162	232.034	213.519	453.216	463.312		18.515	-10.096		162	0.554494	0.42075
163	230.345	216.527	438.14	468.285		13.818	-30.145		163	0.477768	0.211081
164	222.245	206.689	433.899	455.163		15.556	-21.264		164	0.506158	0.303957
165	223.99	208.542	453.077	466.167		15.448	-13.09		165	0.504394	0.38944
166	225.679	203.067	451.014	456.94		22.612	-5.926		166	0.621419	0.46436
167	229.486	209.754	456.075	450.978		19.732	5.097		167	0.574374	0.579636
168	224.127	207.593	441.075	442.179		16.534	-1.104		168	0.522134	0.514787
169	225.981	208.429	432.241	445.757		17.552	-13.516		169	0.538763	0.384985
170	222.559	207.7	432.294	444.674		14.859	-12.38		170	0.494773	0.396865
171	216.842	203.93	425.628	435.83		12.912	-10.202		171	0.462968	0.419642
172	215.019	205.895	421.432	433.511		9.124	-12.079		172	0.401091	0.400013
173	216.638	202.548	420.918	438.817		14.09	-17.899		173	0.482211	0.339148
174	209.146	195.361	407.854	417.967		13.785	-10.113		174	0.477229	0.420573
175	209.788	193.724	394.571	420.108		16.064	-25.537		175	0.514457	0.259271
176	207.421	191.037	406.065	420.63		16.384	-14.565		176	0.519684	0.374014
177	207.353	190.506	396.502	415.875		16.847	-19.373		177	0.527247	0.323733
178	206.459	192.698	402.435	415.019		13.761	-12.584		178	0.476837	0.394731
179	204.584	187.313	378.517	401.279		17.271	-22.762		179	0.534173	0.288291
180	202.822	190.674	373.726	393.087		12.148	-19.361		180	0.450488	0.323859
181	204.264	184.519	369.509	371.183		19.745	-1.674		181	0.574586	0.508826
182	207.545	186.154	364.199	373.019		21.391	-8.82		182	0.601473	0.434095
183	204.01	187.35	366.286	384.211		16.66	-17.925		183	0.524192	0.338876
184	204.344	181.888	385.846	396.022		22.456	-10.176		184	0.61887	0.419914
185	199.315	186.877	366.675	392.536		12.438	-25.861		185	0.455226	0.255883
186	202.47	187.683	375.18	393.813		14.787	-18.633		186	0.493597	0.331472
187	198.132	180.377	379.951	384.808		17.755	-4.857		187	0.542079	0.475539
188	197.417	183.852	375.559	391.534		13.565	-15.975		188	0.473635	0.359269
189	189.955	180.909	361.066	376.315		9.046	-15.249		189	0.399817	0.366861
190	193.44	182.562	369.233	384.195		10.878	-14.962		190	0.429743	0.369863
191	196.201	182.9	373.366	377.86		13.301	-4.494		191	0.469323	0.479335
192	198.677	187.18	384.831	402.98		11.497	-18.149		192	0.439854	0.336533
193	199.835	188.32	370.293	395.52		11.515	-25.227		193	0.440148	0.262513
194	196.342	183.89	381.484	399.902		12.452	-18.418		194	0.455454	0.33372

## Sheet: exp1-endosome3
endosome 3						dMFI				%dMFI
frame #	Rab7(rim)	Rab7(background)	Rab11(rim)	Rab11(background)		Rab7	Rab11		frame #	Rab7	Rab11
29	222.97	232.388	434.803	450.298		-9.418	-15.495		29	0.0881499	0.359678
30	226.432	236.878	456.091	485.926		-10.446	-29.835		30	0.0702694	0.136136
31	233.964	240.429	491.443	479.092		-6.465	12.351		31	0.139513	0.793761
32	224.007	229.959	488.879	477.291		-5.952	11.588		32	0.148435	0.781867
33	228.75	234.367	455.407	469.556		-5.617	-14.149		33	0.154262	0.380661
34	222.85	235.245	446.179	456.245		-12.395	-10.066		34	0.0363696	0.444309
35	223.579	232.122	426.7	447.607		-8.543	-20.907		35	0.103369	0.275312
36	220.05	230.811	422.279	426.036		-10.761	-3.757		36	0.0647905	0.542658
37	227.786	236.026	445.279	442.235		-8.24	3.044		37	0.108639	0.648677
38	225.293	237.117	441.457	437.801		-11.824	3.656		38	0.0463013	0.658218
39	219.371	233.857	437.171	445.168		-14.486	-7.997		39	0	0.476562
40	215.879	227.061	432.321	438.107		-11.182	-5.786		40	0.0574679	0.511029
41	218.386	221.842	412.886	412.847		-3.456	0.039		41	0.191849	0.601833
42	229.114	226.449	443.3	439.276		2.665	4.024		42	0.298315	0.663954
43	232.9	221.153	425.257	432.776		11.747	-7.519		43	0.456282	0.484014
44	241.65	238.964	437.029	423.939		2.686	13.09		44	0.29868	0.805281
45	251.206	235.505	456.721	452.635		15.701	4.086		45	0.525055	0.664921
46	240.523	237.293	430.439	450.495		3.23	-20.056		46	0.308142	0.288578
47	239.985	235.277	414.235	452.803		4.708	-38.568		47	0.333849	0
48	251.093	233.745	429.257	425.796		17.348	3.461		48	0.553702	0.655178
49	266.221	243.643	464.521	446.321		22.578	18.2		49	0.64467	0.88494
50	259.846	232.464	431.735	445.74		27.382	-14.005		50	0.728228	0.382905
51	256.014	232.592	428.893	428.01		23.422	0.883		51	0.65935	0.61499
52	267.936	238.224	417.614	421.816		29.712	-4.202		52	0.768754	0.535722
53	271.179	233.638	432.943	423.546		37.541	9.397		53	0.904928	0.747712
54	272.053	235.984	419.25	449.303		36.069	-30.053		54	0.879324	0.132738
55	273.438	234.185	426.25	440.895		39.253	-14.645		55	0.934705	0.372929
56	286.812	243.805	435.59	433.955		43.007	1.635		56	1	0.626713
57	264.493	244.542	408.147	426.719		19.951	-18.572		57	0.598977	0.311712
58	250.382	223.833	391.029	405.896		26.549	-14.867		58	0.713739	0.369468
59	242.89	222.594	415.971	421.073		20.296	-5.102		59	0.604978	0.521692
60	242.118	223.974	394.544	404.589		18.144	-10.045		60	0.567547	0.444637
61	236.772	220.573	410.625	403.276		16.199	7.349		61	0.533717	0.715787
62	241.265	234.144	416.924	425.117		7.121	-8.193		62	0.37582	0.473507
63	235.765	228.266	427.856	452.787		7.499	-24.931		63	0.382394	0.212583
64	237.212	226.644	438.553	438.463		10.568	0.09		64	0.435775	0.602628
65	230.28	224.053	442.106	447.814		6.227	-5.708		65	0.36027	0.512245
66	217.773	211.074	410.886	421.33		6.699	-10.444		66	0.36848	0.438417
67	219.917	216.346	431.144	427.995		3.571	3.149		67	0.314073	0.650314
68	216.167	216.33	439.235	431.128		-0.163	8.107		68	0.249126	0.727603
69	223.432	220.128	415.758	405.356		3.304	10.402		69	0.309429	0.763379
70	235.667	224.543	414.106	403.511		11.124	10.595		70	0.445446	0.766388
71	234.462	222.239	432.765	415.702		12.223	17.063		71	0.464561	0.867215
72	231.481	221.598	436.812	432.614		9.883	4.198		72	0.42386	0.666667
73	215.631	213.539	396.869	417.573		2.092	-20.704		73	0.288348	0.278477
74	233.12	220.19	412.293	395.026		12.93	17.267		74	0.476858	0.870395
75	236.016	224.696	431.635	424.908		11.32	6.727		75	0.448855	0.706091
76	230.893	219.027	396.267	396.214		11.866	0.053		76	0.458351	0.602051
77	233.66	214.67	407.889	392.46		18.99	15.429		77	0.582262	0.841743
78	228.379	214.947	438.205	418.952		13.432	19.253		78	0.48559	0.901355
79	215.159	212.544	426.881	436.016		2.615	-9.135		79	0.297445	0.458822
80	229.641	221.435	448.984	439.315		8.206	9.669		80	0.394692	0.751952
81	247.621	232.653	462.086	436.505		14.968	25.581		81	0.512306	1
82	228.516	221.978	407.664	429.461		6.538	-21.797		82	0.365679	0.261438
83	235.273	229	406.445	406.706		6.273	-0.261		83	0.36107	0.597157
84	221.573	216.256	404.476	417.364		5.317	-12.888		84	0.344442	0.400318
85	234.789	218.9	399.055	388.906		15.889	10.149		85	0.528325	0.759435
86	241.586	227.4	430.641	419.461		14.186	11.18		86	0.498704	0.775507
87	223.397	220.68	398.914	410.785		2.717	-11.871		87	0.299219	0.416172
88	227.398	216.55	414.82	422.144		10.848	-7.324		88	0.440645	0.487054
89	228.093	225.659	414.88	430.457		2.434	-15.577		89	0.294297	0.3584
90	224.766	220.05	418.289	432.361		4.716	-14.072		90	0.333988	0.381861
91	224.524	215.131	423.831	440.244		9.393	-16.413		91	0.415338	0.345368
92	228.009	220.355	409.974	429.285		7.654	-19.311		92	0.38509	0.300192
93	219.157	210.982	398.176	402.018		8.175	-3.842		93	0.394152	0.541333
94	225.417	216.034	391.417	419.994		9.383	-28.577		94	0.415164	0.155747

## Sheet: exp1-endosome4
endosome 4						dMFI				%dMFI
frame #	Rab7(rim)	Rab7(background)	Rab11(rim)	Rab11(background)		Rab7	Rab11		frame #	Rab7	Rab11
51	241.189	250.286	554.274	520.695		-9.097	33.579		51	0.042273	0.732432
52	244.872	252.741	533.866	525.682		-7.869	8.184		52	0.0700627	0.514941
53	239.613	247.185	562.188	547.315		-7.572	14.873		53	0.0767838	0.572228
54	237.588	246.727	573.306	550.546		-9.139	22.76		54	0.0413225	0.639775
55	251.169	253.407	574.344	546.514		-2.238	27.83		55	0.197493	0.683196
56	242.975	253.94	561.919	545.273		-10.965	16.646		56	0	0.587412
57	233.463	242.065	517.181	524.926		-8.602	-7.745		57	0.0534748	0.378519
58	235.536	240.446	535.601	505.522		-4.91	30.079		58	0.137025	0.702457
59	235.107	238.558	545.304	526.277		-3.451	19.027		59	0.170042	0.607804
60	235.494	239.299	560.125	508.911		-3.805	51.214		60	0.162031	0.883465
61	231.101	241.987	526.06	513.223		-10.886	12.837		61	0.00178778	0.55479
62	251.9	256.745	572.638	578.389		-4.845	-5.751		62	0.138496	0.395596
63	254.744	253.384	608.339	543.518		1.36	64.821		63	0.278916	1
64	251.45	254.741	558.1	533.542		-3.291	24.558		64	0.173663	0.655173
65	244.137	251.935	527.531	531.088		-7.798	-3.557		65	0.0716694	0.414386
66	246.831	249.106	523.45	534.847		-2.275	-11.397		66	0.196655	0.347242
67	245.863	249.185	513.587	534.398		-3.322	-20.811		67	0.172962	0.266617
68	246.631	241.648	480.875	484.833		4.983	-3.958		68	0.360904	0.410952
69	253.037	245.444	510.738	502.88		7.593	7.858		69	0.419969	0.512149
70	256.675	245.764	536.656	513.806		10.911	22.85		70	0.495055	0.640545
71	257.75	242.565	511.45	500.431		15.185	11.019		71	0.591776	0.53922
72	266.923	240.884	477.012	487.326		26.039	-10.314		72	0.837403	0.356517
73	263.256	244.701	519.601	504.839		18.555	14.762		73	0.66804	0.571277
74	269.012	247.857	503.899	478.103		21.155	25.796		74	0.726878	0.665776
75	263.643	243.509	519.315	516.549		20.134	2.766		75	0.703772	0.468539
76	260.646	244.714	465.909	485.291		15.932	-19.382		76	0.608681	0.278855
77	256.738	235.694	481.475	513.347		21.044	-31.872		77	0.724366	0.171887
78	259.431	243.306	478.363	507.097		16.125	-28.734		78	0.613048	0.198762
79	264.423	243.375	501.982	493.938		21.048	8.044		79	0.724456	0.513742
80	269.595	243.616	477.964	489.567		25.979	-11.603		80	0.836045	0.345478
81	273.244	248.645	516.085	509.032		24.599	7.053		81	0.804816	0.505254
82	273.399	251.223	526.679	536.491		22.176	-9.812		82	0.749983	0.360816
83	264.988	248.228	506.917	517.513		16.76	-10.596		83	0.627419	0.354102
84	271.517	246.929	530.785	518.299		24.588	12.486		84	0.804567	0.551784
85	261.314	243.071	532.599	529.558		18.243	3.041		85	0.660979	0.470894
86	275.17	250.961	559.517	551.864		24.209	7.653		86	0.79599	0.510393
87	275.085	243.358	540.705	537.961		31.727	2.744		87	0.966123	0.46835
88	275.097	246.759	517.136	528.293		28.338	-11.157		88	0.889429	0.349297
89	278.432	248.333	521.04	533.939		30.099	-12.899		89	0.929281	0.334378
90	287.347	256.965	555.335	568.614		30.382	-13.279		90	0.935685	0.331124
91	273.051	245.875	519.841	529.112		27.176	-9.271		91	0.863133	0.36545
92	263.217	243.648	530.472	522.386		19.569	8.086		92	0.690986	0.514101
93	257.75	233.712	479.672	485.314		24.038	-5.642		93	0.79212	0.39653
94	250.856	233.085	492	507.636		17.771	-15.636		94	0.650298	0.310938
95	258.017	240.138	487.915	506.203		17.879	-18.288		95	0.652742	0.288225
96	268.188	246.207	507.199	502.629		21.981	4.57		96	0.74557	0.483989
97	267.506	252.75	511.977	520.902		14.756	-8.925		97	0.582068	0.368413
98	270.335	250.14	488.244	502.662		20.195	-14.418		98	0.705153	0.321369
99	270.352	252.664	487.159	490.724		17.688	-3.565		99	0.648419	0.414318
100	273.603	240.379	490.739	486.133		33.224	4.606		100	1	0.484297
101	259.767	239.684	486.051	487.11		20.083	-1.059		101	0.702618	0.43578
102	264.801	241.842	477.494	481.184		22.959	-3.69		102	0.767702	0.413247
103	264.483	244.099	500.455	503.164		20.384	-2.709		103	0.70943	0.421649
104	262.761	236.978	506.091	486.457		25.783	19.634		104	0.83161	0.613002
105	256.46	230.31	454.983	467.957		26.15	-12.974		105	0.839915	0.333736
106	253.415	235.509	484.977	481.89		17.906	3.087		106	0.653353	0.471288
107	245.432	229.237	459.562	485.776		16.195	-26.214		107	0.614633	0.220344
108	248.568	235.293	488.869	491.944		13.275	-3.075		108	0.548553	0.418514
109	246.68	229.638	492.424	508.933		17.042	-16.509		109	0.6338	0.303461
110	254.715	226.915	491.337	503.826		27.8	-12.489		110	0.877255	0.33789
111	250.262	232.527	506.151	505.21		17.735	0.941		111	0.649483	0.452909
112	259.352	234.851	511.58	500.588		24.501	10.992		112	0.802598	0.538989
113	252.476	232.71	486.006	484.701		19.766	1.305		113	0.695445	0.456026
114	247.976	228.5	483.399	504.719		19.476	-21.32		114	0.688882	0.262258
115	252.006	238.816	491.853	520.769		13.19	-28.916		115	0.546629	0.197203
116	248.534	239.897	462.257	503.779		8.637	-41.522		116	0.443595	0.0892406
117	242.095	238.676	468.818	520.76		3.419	-51.942		117	0.325511	0

## Sheet: exp1-endosome5
endosome 5						dMFI				%dMFI
frame #	Rab7(rim)	Rab7(background)	Rab11(rim)	Rab11(background)		Rab7	Rab11		frame #	Rab7	Rab11
34	236.038	259.186	366.036	405.679		-23.148	-39.643		34	0.0381307	0
35	236.578	249.372	399.014	426.439		-12.794	-27.425		35	0.187565	0.169419
36	244.455	270.245	400.841	401.332		-25.79	-0.491		36	0	0.542896
37	245.28	255.66	405.803	405.75		-10.38	0.053		37	0.222405	0.550439
38	245.356	270.495	411.367	418.033		-25.139	-6.666		38	0.00939557	0.457271
39	245.379	244.543	412.159	447.654		0.836	-35.495		39	0.38428	0.0575176
40	247.235	240.362	413.178	443.908		6.873	-30.73		40	0.471409	0.123591
41	249.189	243.309	414	408.707		5.88	5.293		41	0.457078	0.623099
42	252.536	268.173	414.5	394.819		-15.637	19.681		42	0.146533	0.822608
43	252.691	269.542	414.871	421.056		-16.851	-6.185		43	0.129012	0.463941
44	256.803	255.33	418.168	441.166		1.473	-22.998		44	0.393474	0.230805
45	259.243	261.599	420.179	444.571		-2.356	-24.392		45	0.338212	0.211476
46	260.659	255.016	421.414	420.444		5.643	0.97		46	0.453657	0.563154
47	263.65	265.908	423.353	452.62		-2.258	-29.267		47	0.339626	0.143877
48	291.419	275.432	423.78	419.34		15.987	4.44		48	0.602947	0.611271
49	300.75	281.562	427.659	398.761		19.188	28.898		49	0.649146	0.950414
50	302.345	288.85	430.015	429.099		13.495	0.916		50	0.566981	0.562406
51	303.752	297.124	432.515	427.382		6.628	5.133		51	0.467873	0.62088
52	304.833	292.31	436.457	434.214		12.523	2.243		52	0.552953	0.580806
53	305.943	288.449	437.404	418.547		17.494	18.857		53	0.624697	0.811182
54	306.054	312.125	437.566	437.531		-6.071	0.035		54	0.284595	0.550189
55	306.604	287.07	437.756	448.118		19.534	-10.362		55	0.654139	0.406021
56	307.02	276.382	438.107	441.551		30.638	-3.444		56	0.814398	0.501948
57	307.229	303.699	443.418	420.295		3.53	23.123		57	0.423161	0.870336
58	311.838	282.651	444.106	461.17		29.187	-17.064		58	0.793456	0.313088
59	311.871	284.439	445.186	478.005		27.432	-32.819		59	0.768127	0.094624
60	312.098	307.048	446.061	429.545		5.05	16.516		60	0.445099	0.778721
61	313.286	293.628	446.354	449.86		19.658	-3.506		61	0.655929	0.501089
62	316.138	287.361	446.621	462.532		28.777	-15.911		62	0.787539	0.329076
63	316.372	295.968	446.843	473.791		20.404	-26.948		63	0.666696	0.176033
64	316.459	303.565	447.023	433.059		12.894	13.964		64	0.558307	0.743334
65	316.764	300.455	447.026	457.159		16.309	-10.133		65	0.607594	0.409196
66	320.852	301.978	448.77	471.49		18.874	-22.72		66	0.644614	0.23466
67	321.393	301.663	449.221	466.75		19.73	-17.529		67	0.656968	0.306641
68	322.928	302.809	451.072	455.413		20.119	-4.341		68	0.662582	0.48951
69	323.385	300.695	453.172	453.439		22.69	-0.267		69	0.699688	0.546002
70	326.21	305.7	456.169	468.855		20.51	-12.686		70	0.668225	0.373795
71	329.978	301.51	457.288	424.814		28.468	32.474		71	0.783079	1
72	336.542	303.957	458.522	450.979		32.585	7.543		72	0.842498	0.654298
73	337.151	322.187	466.209	502.26		14.964	-36.051		73	0.588183	0.049808
74	339.206	295.708	468.271	481.295		43.498	-13.024		74	1	0.369109
75	343.076	325.176	468.436	474.122		17.9	-5.686		75	0.630557	0.47086
76	343.149	305.495	469.368	477.225		37.654	-7.857		76	0.915656	0.440756
77	344.071	304.607	470.735	485.287		39.464	-14.552		77	0.941779	0.347921
78	349.481	312.171	473.704	461.294		37.31	12.41		78	0.910692	0.721785
79	355.231	325.027	485.787	470.995		30.204	14.792		79	0.808134	0.754815

## Sheet: exp1-endosome6
endosome 6						dMFI				%dMFI
frame #	Rab7(rim)	Rab7(background)	Rab11(rim)	Rab11(background)		Rab7	Rab11		frame #	Rab7	Rab11
1	328.676	349.539	449.894	474.477		-20.863	-24.583		1	0.063962	0.167982
2	336.778	361.474	456.559	479.438		-24.696	-22.879		2	0.0221818	0.18515
3	336.807	363.11	460.321	492.019		-26.303	-31.698		3	0.00466526	0.0962932
4	338.801	363.177	464.572	464.707		-24.376	-0.135		4	0.0256698	0.414311
5	339.5	363.86	466.147	495.538		-24.36	-29.391		5	0.0258442	0.119538
6	340.091	365.934	473.461	487.436		-25.843	-13.975		6	0.00967932	0.274864
7	340.273	361.053	474.673	500.208		-20.78	-25.535		7	0.0648667	0.15839
8	343.773	370.504	476.017	475.054		-26.731	0.963		8	0	0.425375
9	344.903	370.522	477.583	492.64		-25.619	-15.057		9	0.0121209	0.263962
10	348.551	359.605	479.351	497.545		-11.054	-18.194		10	0.170881	0.232355
11	353.797	366.254	480.562	480.417		-12.457	0.145		11	0.155588	0.417133
12	354.931	343.38	481.39	494.191		11.551	-12.801		12	0.417279	0.286693
13	356.1	372.653	483.441	495.288		-16.553	-11.847		13	0.110942	0.296305
14	357.021	355.316	483.812	487.295		1.705	-3.483		14	0.309956	0.380578
15	357.099	344.407	487.618	504.582		12.692	-16.964		15	0.429716	0.244748
16	360.796	350.98	490.74	490.456		9.816	0.284		16	0.398367	0.418533
17	361.378	365.495	495.911	498.96		-4.117	-3.049		17	0.246496	0.384951
18	361.971	362.526	496.521	512.908		-0.555	-16.387		18	0.285322	0.250562
19	363.41	350.83	498.207	494.667		12.58	3.54		19	0.428495	0.45134
20	364.046	336.51	498.829	496.519		27.536	2.31		20	0.591518	0.438946
21	365.083	361.03	499.814	503.586		4.053	-3.772		21	0.33555	0.377666
22	365.875	359.149	501.392	522		6.726	-20.608		22	0.364686	0.208032
23	366.712	354.13	502.018	503.004		12.582	-0.986		23	0.428517	0.405737
24	366.888	363.615	503.636	490.531		3.273	13.105		24	0.327048	0.547713
25	367.954	359.043	505.836	516.27		8.911	-10.434		25	0.388503	0.310542
26	368.775	354.144	509.444	510.903		14.631	-1.459		26	0.450851	0.400971
27	370.122	366.31	509.773	512.491		3.812	-2.718		27	0.332923	0.388286
28	372.224	347.54	515.94	502.071		24.684	13.869		28	0.56043	0.555411
29	372.55	359.06	518.114	529.733		13.49	-11.619		29	0.438414	0.298603
30	372.788	381.525	519.985	517.8		-8.737	2.185		30	0.196137	0.437687
31	373.088	364.61	521.648	512.923		8.478	8.725		31	0.383783	0.503582
32	373.816	346.234	522.402	512.029		27.582	10.373		32	0.592019	0.520187
33	380.158	369.798	522.636	504.554		10.36	18.082		33	0.404297	0.59786
34	381.857	353.819	524.778	514.384		28.038	10.394		34	0.596989	0.520398
35	383.04	351.892	526.77	516.02		31.148	10.75		35	0.630889	0.523985
36	383.815	342.571	528.051	499.827		41.244	28.224		36	0.740937	0.700047
37	385.189	350.609	528.5	506.125		34.58	22.375		37	0.668298	0.641115
38	385.83	358.355	529.537	494.467		27.475	35.07		38	0.590853	0.769025
39	386.526	364.234	530.314	492.988		22.292	37.326		39	0.534357	0.791756
40	387.08	347.298	536.29	533.478		39.782	2.812		40	0.725001	0.444004
41	387.391	353.788	537.582	509.617		33.603	27.965		41	0.657649	0.697438
42	387.706	349.431	538.011	539.041		38.275	-1.03		42	0.708574	0.405294
43	387.953	354.661	538.638	550.16		33.292	-11.522		43	0.654259	0.29958
44	389.622	341.598	540.342	495.346		48.024	44.996		44	0.814839	0.869036
45	389.635	359.663	542.006	544.186		29.972	-2.18		45	0.61807	0.393707
46	389.787	339.578	542.511	549.643		50.209	-7.132		46	0.838656	0.343812
47	389.864	360.595	544.603	538.321		29.269	6.282		47	0.610407	0.478967
48	390.054	345.317	545.092	530.296		44.737	14.796		48	0.779011	0.564751
49	390.75	355.621	545.778	545.75		35.129	0.028		49	0.674282	0.415954
50	390.771	374.238	545.903	562.547		16.533	-16.644		50	0.471583	0.247972
51	390.832	362.149	547.131	577.636		28.683	-30.505		51	0.60402	0.108313
52	390.932	343.431	548.578	574.665		47.501	-26.087		52	0.809139	0.152828
53	391.289	347.034	548.628	539.887		44.255	8.741		53	0.773757	0.503743
54	391.602	362.835	549.267	543.983		28.767	5.284		54	0.604936	0.468912
55	391.839	360.076	549.565	565.054		31.763	-15.489		55	0.637592	0.25961
56	392.75	359.61	550.983	552.384		33.14	-1.401		56	0.652602	0.401556
57	394.006	347.777	551.725	543.159		46.229	8.566		57	0.795274	0.50198
58	394.45	348.453	553.59	518.459		45.997	35.131		58	0.792745	0.76964
59	395.032	385.127	553.622	531.472		9.905	22.15		59	0.399337	0.638848
60	395.87	349.538	553.653	515.335		46.332	38.318		60	0.796396	0.801751
61	396.582	359.54	553.848	536.275		37.042	17.573		61	0.695134	0.592731
62	397.239	357.914	554.422	551.144		39.325	3.278		62	0.720019	0.4487
63	397.883	374.725	554.811	542.98		23.158	11.831		63	0.543797	0.534877
64	398.428	344.534	559.511	580.345		53.894	-20.834		64	0.878823	0.205755
65	398.798	379.369	561.021	548.984		19.429	12.037		65	0.50315	0.536953
66	402.828	347.318	561.224	549.173		55.51	12.051		66	0.896438	0.537094
67	403.81	349.812	564.106	559.428		53.998	4.678		67	0.879957	0.462806
68	407.049	360.75	565.878	541.182		46.299	24.696		68	0.796037	0.6645
69	407.352	362.327	566.138	537.52		45.025	28.618		69	0.78215	0.704017
70	408.674	347.779	566.793	551.172		60.895	15.621		70	0.955135	0.573064
71	410.729	386.48	568.75	587.596		24.249	-18.846		71	0.555689	0.225786
72	411.168	353.879	569.289	549.644		57.289	19.645		72	0.915829	0.613608
73	413.926	351.955	570.888	557.129		61.971	13.759		73	0.966864	0.554303
74	414.467	359.017	572.364	600.351		55.45	-27.987		74	0.895784	0.133684
75	416.062	374.492	578.694	548.996		41.57	29.698		75	0.74449	0.714899
76	418.135	391.484	579.141	548.083		26.651	31.058		76	0.581871	0.728602
77	418.76	378.923	582.744	599.855		39.837	-17.111		77	0.7256	0.243267
78	419.429	362.167	583.994	605.759		57.262	-21.765		78	0.915535	0.196375
79	420.408	383.214	585.824	627.079		37.194	-41.255		79	0.696791	0
80	421.984	358.762	587.383	558.434		63.222	28.949		80	0.9805	0.707352
81	422.326	360.712	587.867	560.541		61.614	27.326		81	0.962972	0.690999
82	423.342	368.835	591.204	584.153		54.507	7.051		82	0.885505	0.486715
83	425.985	378.98	594.989	606.715		47.005	-11.726		83	0.803732	0.297524
84	426.745	399.879	595.179	572.714		26.866	22.465		84	0.584214	0.642022
85	428.984	366.693	595.657	616.862		62.291	-21.205		85	0.970352	0.202017
86	435.944	382.661	597.031	591.677		53.283	5.354		86	0.872163	0.469617
87	438.077	383.492	605.184	547.19		54.585	57.994		87	0.886355	1
88	442.781	377.77	608.852	625.132		65.011	-16.28		88	1	0.25164

## Sheet: exp1-endosome7
endosome 7						dMFI				%dMFI
frame #	Rab7(rim)	Rab7(background)	Rab11(rim)	Rab11(background)		Rab7	Rab11		frame #	Rab7	Rab11
23	241.047	254.789	363.157	401.634		-13.742	-38.477		23	0.182038	0
24	253.565	280.21	389.33	403.78		-26.645	-14.45		24	0.0283485	0.188351
25	253.875	273.289	407.842	406.767		-19.414	1.075		25	0.114478	0.310054
26	257.875	266.306	408.425	412.136		-8.431	-3.711		26	0.245298	0.272536
27	260.532	273.057	409.625	414.3		-12.525	-4.675		27	0.196534	0.264979
28	262.031	276.4	413.107	422.744		-14.369	-9.637		28	0.17457	0.226081
29	262.939	281.931	413.267	406.483		-18.992	6.784		29	0.119504	0.354807
30	264.565	276.784	416.583	417.858		-12.219	-1.275		30	0.200179	0.291632
31	265.121	281.962	418.306	422.136		-16.841	-3.83		31	0.145125	0.271603
32	266.152	266.176	418.775	449.352		-0.024	-30.577		32	0.345435	0.0619292
33	267.602	278.283	421.548	404.46		-10.681	17.088		33	0.218498	0.435582
34	269.129	282.37	423.331	418.58		-13.241	4.751		34	0.188005	0.33887
35	269.532	284.347	423.354	425.527		-14.815	-2.173		35	0.169257	0.284592
36	270.578	281.483	424.008	430.539		-10.905	-6.531		36	0.21583	0.250429
37	273.113	279.193	425.283	426.761		-6.08	-1.478		37	0.273301	0.29004
38	275.765	271.568	427.952	403.261		4.197	24.691		38	0.395712	0.495183
39	276.141	273.85	428.034	414.151		2.291	13.883		39	0.373009	0.410457
40	284.426	274.957	428.218	414.477		9.469	13.741		40	0.458508	0.409344
41	284.516	275.606	430.677	415.278		8.91	15.399		41	0.451849	0.422342
42	285.088	285.677	431.417	424.983		-0.589	6.434		42	0.338705	0.352064
43	286.344	308.361	432.125	457.398		-22.017	-25.273		43	0.0834733	0.103508
44	288.492	291.956	432.15	440.926		-3.464	-8.776		44	0.304461	0.23283
45	288.644	281.176	441.419	416.21		7.468	25.209		45	0.434673	0.499244
46	288.676	274.426	447.5	446.45		14.25	1.05		46	0.515455	0.309858
47	288.984	302.911	449.185	451.824		-13.927	-2.639		47	0.179834	0.280939
48	290.203	319.228	449.591	432.451		-29.025	17.14		48	0	0.435989
49	290.717	271.676	450.172	452.189		19.041	-2.017		49	0.572521	0.285815
50	291.189	277.819	453.367	439.386		13.37	13.981		50	0.504973	0.411226
51	291.259	272.286	455.202	457.659		18.973	-2.457		51	0.571711	0.282366
52	291.363	278.207	455.348	452.049		13.156	3.299		52	0.502424	0.327488
53	291.409	286.324	457.477	457.739		5.085	-0.262		53	0.406289	0.299573
54	292.531	281.033	460.161	456.278		11.498	3.883		54	0.482675	0.332066
55	292.773	312.083	461.086	420.728		-19.31	40.358		55	0.115717	0.617999
56	293.05	272.682	462.992	434.744		20.368	28.248		56	0.588327	0.523067
57	293.08	281.815	463.312	431.672		11.265	31.64		57	0.4799	0.549657
58	294.367	312.5	466.235	440.832		-18.133	25.403		58	0.129736	0.500764
59	295.078	282.6	466.469	430.083		12.478	36.386		59	0.494348	0.586862
60	296.625	312.017	469.102	495.917		-15.392	-26.815		60	0.162385	0.0914201
61	298.602	312.45	472.455	468.918		-13.848	3.537		61	0.180775	0.329354
62	298.634	275.465	472.508	470.298		23.169	2.21		62	0.62169	0.318951
63	298.664	290.744	472.689	450.435		7.92	22.254		63	0.440057	0.476079
64	298.773	280.745	477.674	447.798		18.028	29.876		64	0.560455	0.535829
65	298.806	293.188	479.055	454.4		5.618	24.655		65	0.412638	0.494901
66	302.911	273.602	481.14	478.974		29.309	2.166		66	0.694825	0.318606
67	304.448	284.448	481.227	455.45		20	25.777		67	0.583944	0.503696
68	306.492	280.83	481.516	448.727		25.662	32.789		68	0.651385	0.558664
69	307.485	296.478	483.221	467.089		11.007	16.132		69	0.476827	0.428088
70	307.692	283.347	486.922	494.561		24.345	-7.639		70	0.635698	0.241743
71	308.008	289.479	487.121	473.122		18.529	13.999		71	0.566422	0.411367
72	308.533	296.364	487.667	476.947		12.169	10.72		72	0.490668	0.385662
73	313.467	298.483	487.902	453		14.984	34.902		73	0.524197	0.575228
74	314.056	289.733	488.364	455.798		24.323	32.566		74	0.635436	0.556916
75	316.097	289.415	490.161	463.023		26.682	27.138		75	0.663534	0.514365
76	317.484	288.426	490.742	495.239		29.058	-4.497		76	0.691835	0.266374
77	321.883	287.676	496.831	466.636		34.207	30.195		77	0.753165	0.538329
78	322.097	289.534	497.516	507.756		32.563	-10.24		78	0.733583	0.221354
79	326.125	298.106	501.5	490.883		28.019	10.617		79	0.679459	0.384855
80	327.562	296.633	503.258	487.589		30.929	15.669		80	0.714121	0.424458
81	329.515	285.163	504.148	477.222		44.352	26.926		81	0.874004	0.512703
82	330.633	304.267	506.062	516.567		26.366	-10.505		82	0.65977	0.219276
83	332.117	301.102	506.992	503.767		31.015	3.225		83	0.715145	0.326908
84	332.185	297.142	516.076	504.367		35.043	11.709		84	0.763123	0.393415
85	334.05	298.449	516.524	479.83		35.601	36.694		85	0.76977	0.589276
86	334.508	296.028	517.203	517.722		38.48	-0.519		86	0.804062	0.297558
87	335	298.881	527.188	517.783		36.119	9.405		87	0.775939	0.375354
88	337.102	282.172	531.227	520.911		54.93	10.316		88	1	0.382495
89	337.25	293.168	537.977	461.961		44.082	76.016		89	0.870788	0.897527
90	341.46	306.92	565.477	476.389		34.54	89.088		90	0.757132	1

## Sheet: exp1-endosome8
endosome 8						dMFI				%dMFI
frame #	Rab7(rim)	Rab7(background)	Rab11(rim)	Rab11(background)		Rab7	Rab11		frame #	Rab7	Rab11
123	237.795	268.622	411.75	416.096		-30.827	-4.346		123	0	0.52372
124	239.265	266.106	389.447	388.633		-26.841	0.814		124	0.0659562	0.624002
125	257.684	278.385	433.735	416.219		-20.701	17.516		125	0.167555	0.948596
126	252.257	270.638	418.05	420.378		-18.381	-2.328		126	0.205944	0.562938
127	247.205	267.011	431.182	431.239		-19.806	-0.057		127	0.182364	0.607074
128	245.125	259.932	416.417	429.034		-14.807	-12.617		128	0.265083	0.362977
129	236.475	256.864	407.017	416.886		-20.389	-9.869		129	0.172717	0.416383
130	232.227	250.539	375.766	391.15		-18.312	-15.384		130	0.207085	0.309202
131	234.462	241.431	371.561	391.383		-6.969	-19.822		131	0.394778	0.222952
132	235.602	241.911	379.562	397.411		-6.309	-17.849		132	0.405699	0.261296
133	236.555	244.1	379.852	391.633		-7.545	-11.781		133	0.385247	0.379225
134	239.383	254.494	370.45	401.744		-15.111	-31.294		134	0.260052	0
135	245.242	254.961	378.055	392.161		-9.719	-14.106		135	0.349274	0.334039
136	254.719	267.283	366.477	387.233		-12.564	-20.756		136	0.302197	0.2048
137	260.992	273.059	394.765	403.234		-12.067	-8.469		137	0.310421	0.443591
138	258.551	270.083	382.279	394.49		-11.532	-12.211		138	0.319274	0.370868
139	263.066	267.068	417.419	414.677		-4.002	2.742		139	0.443873	0.661471
140	249.833	253.386	370.841	396.886		-3.553	-26.045		140	0.451302	0.102011
141	239.97	245.973	371.992	394.348		-6.003	-22.356		141	0.410762	0.173705
142	246.897	246.469	387.088	404.49		0.428	-17.402		142	0.517176	0.269983
143	250.909	260.239	402.409	389.777		-9.33	12.632		143	0.35571	0.853678
144	247.083	260.553	402.189	392.723		-13.47	9.466		144	0.287206	0.792148
145	236.076	242.479	385.189	372.16		-6.403	13.029		145	0.404143	0.861393
146	239.326	243.043	385.742	399.082		-3.717	-13.34		146	0.448589	0.348926
147	242.439	250.582	399.167	408.12		-8.143	-8.953		147	0.375352	0.434185
148	250.176	255.599	401.088	405.792		-5.423	-4.704		148	0.420359	0.516762
149	255.508	261.42	403.318	400.936		-5.912	2.382		149	0.412268	0.654475
150	274.236	255.102	412.586	401.224		19.134	11.362		150	0.826704	0.828996
151	258.794	248.807	389.89	386.375		9.987	3.515		151	0.675348	0.676494
152	265.486	245.974	410.3	397.51		19.512	12.79		152	0.832958	0.856749
153	255	241.25	413.206	415.474		13.75	-2.268		153	0.737615	0.564105
154	262.571	249.893	402.093	398.321		12.678	3.772		154	0.719876	0.681489
155	270.336	258.862	404.564	402.724		11.474	1.84		155	0.699954	0.643941
156	258.667	246.91	390.028	394.86		11.757	-4.832		156	0.704636	0.514275
157	254.213	255.927	389.059	399.693		-1.714	-10.634		157	0.481732	0.401516
158	247.593	245.311	376.193	381.648		2.282	-5.455		158	0.547854	0.502167
159	261.064	253.423	380.764	393.99		7.641	-13.226		159	0.636529	0.351142
160	257.316	248.359	391.287	408.948		8.957	-17.661		160	0.658305	0.26495
161	256.272	248.38	371.044	393.812		7.892	-22.768		161	0.640682	0.165698
162	255.361	239.585	405.965	403.485		15.776	2.48		162	0.771139	0.656379
163	259.757	238.905	426.556	418.11		20.852	8.446		163	0.855131	0.772325
164	255.597	234.685	412.403	422.33		20.912	-9.927		164	0.856124	0.415256
165	261.464	241.112	394.907	400.179		20.352	-5.272		165	0.846858	0.505723
166	253.007	240.198	382.287	397.818		12.809	-15.531		166	0.722044	0.306345
167	259.576	239.775	412.528	405.665		19.801	6.863		167	0.83774	0.741561
168	264.885	236.515	394.655	380.615		28.37	14.04		168	0.979531	0.881042
169	258.278	234.175	409.785	416.845		24.103	-7.06		169	0.908925	0.470975
170	262.403	237.18	408.361	399.175		25.223	9.186		170	0.927458	0.786707
171	251.912	237.818	416.912	421.927		14.094	-5.015		171	0.743307	0.510718
172	244.1	226.633	417.193	405.76		17.467	11.433		172	0.79912	0.830376
173	249.604	228.76	412.556	394.52		20.844	18.036		173	0.854999	0.958702
174	248	226.525	402.378	387.015		21.475	15.363		174	0.86544	0.906753
175	242.818	230.665	396.466	376.305		12.153	20.161		175	0.711189	1
176	245.896	235.045	380.806	381.42		10.851	-0.614		176	0.689645	0.596249
177	242.588	236.6	351.277	359.76		5.988	-8.483		177	0.609177	0.443319
178	257.432	250.85	387.507	389.86		6.582	-2.353		178	0.619006	0.562453
179	250.436	247.418	357.779	366.015		3.018	-8.236		179	0.560032	0.44812
180	256.792	240.355	373.715	381.335		16.437	-7.62		180	0.782076	0.460091
181	256.417	237.26	354.208	359.135		19.157	-4.927		181	0.827084	0.512428
182	256.646	231.02	359.431	340.905		25.626	18.526		182	0.934126	0.968225
183	250.16	230.435	354.958	348.335		19.725	6.623		183	0.836483	0.736896
184	242.036	227.041	353.764	361.378		14.995	-7.614		184	0.758216	0.460208
185	251.639	231.615	365.007	360.875		20.024	4.132		185	0.84143	0.688485
186	249.618	230.945	349.854	342.415		18.673	7.439		186	0.819075	0.752755
187	245.536	228.612	346.3	351.556		16.924	-5.256		187	0.790135	0.506034
188	259.471	233.944	352.971	348.102		25.527	4.869		188	0.932488	0.702808
189	258.485	233.656	370.051	369.193		24.829	0.858		189	0.920939	0.624857
190	259.125	233.25	368.831	367.469		25.875	1.362		190	0.938247	0.634652
191	271.598	245.707	365.932	365.06		25.891	0.872		191	0.938511	0.625129
192	278.644	249.037	400.348	394.218		29.607	6.13		192	1	0.727315
193	274.235	247.032	395.144	402.213		27.203	-7.069		193	0.960221	0.4708
194	268.667	248.38	395.909	414.766		20.287	-18.857		194	0.845782	0.241706

## Sheet: exp1-endosome9
endosome 9						dMFI				%dMFI
frame #	Rab7(rim)	Rab7(background)	Rab11(rim)	Rab11(background)		Rab7	Rab11		frame #	Rab7	Rab11
68	290.605	324.428	430.507	471.526		-33.823	-41.019		68	0.0387776	0.0103927
69	302.631	335.245	438.797	480.565		-32.614	-41.768		69	0.05281	0
70	303.186	329.925	450.727	453.403		-26.739	-2.676		70	0.120999	0.542417
71	303.41	331.84	453.19	465.933		-28.43	-12.743		71	0.101372	0.402733
72	303.581	330.213	453.833	461.567		-26.632	-7.734		72	0.122241	0.472235
73	303.975	339.389	456.66	464.17		-35.414	-7.51		73	0.0203115	0.475343
74	311.677	348.841	457.928	452.793		-37.164	5.135		74	0	0.650798
75	313.957	341.041	458.462	467.719		-27.084	-9.257		75	0.116994	0.451103
76	315.394	345.88	460.551	469.505		-30.486	-8.954		76	0.0775088	0.455307
77	316.2	336.028	465.068	505.575		-19.828	-40.507		77	0.201212	0.0174969
78	317.381	348.699	465.763	476.887		-31.318	-11.124		78	0.0678521	0.425198
79	320.369	351.393	470.833	481.198		-31.024	-10.365		79	0.0712644	0.435729
80	320.644	352.759	473.948	466.284		-32.115	7.664		80	0.0586016	0.685889
81	321.827	358.585	477.904	469.406		-36.758	8.498		81	0.00471227	0.697461
82	323.194	333.713	482.994	509.218		-10.519	-26.224		82	0.309257	0.215679
83	326.893	339.817	484.171	508.13		-12.924	-23.959		83	0.281344	0.247107
84	327.548	339.281	484.212	503.656		-11.733	-19.444		84	0.295167	0.309754
85	327.551	343.991	484.588	483.78		-16.44	0.808		85	0.240535	0.590759
86	327.726	355.812	485.738	477.5		-28.086	8.238		86	0.105365	0.693853
87	329.31	345.018	486.917	492.307		-15.708	-5.39		87	0.249031	0.504759
88	329.572	352.476	488.312	502.444		-22.904	-14.132		88	0.16551	0.383461
89	329.786	351.719	490.171	501.6		-21.933	-11.429		89	0.17678	0.420966
90	331.482	361.103	492.156	514.838		-29.621	-22.682		90	0.0875485	0.264826
91	335.544	344.157	493.1	503.634		-8.613	-10.534		91	0.33138	0.433384
92	335.565	349.295	493.822	512.139		-13.73	-18.317		92	0.271989	0.325392
93	336.042	372.263	493.85	492.19		-36.221	1.66		93	0.010945	0.602581
94	336.137	371.821	495.151	531.481		-35.684	-36.33		94	0.0171777	0.0754544
95	336.2	342.556	495.525	510.204		-6.356	-14.679		95	0.357576	0.375871
96	337.944	369.806	496.331	517.255		-31.862	-20.924		96	0.0615381	0.289219
97	338.488	366.71	498.131	496.906		-28.222	1.225		97	0.103786	0.596545
98	339.077	373.674	499.363	495.96		-34.597	3.403		98	0.0297941	0.626766
99	339.256	348.496	499.786	513.473		-9.24	-13.687		99	0.324102	0.389635
100	340.369	348.116	500.387	498.569		-7.747	1.818		100	0.341431	0.604773
101	340.78	348.5	502.512	518.384		-7.72	-15.872		101	0.341744	0.359317
102	341.295	357.92	502.899	491.924		-16.625	10.975		102	0.238388	0.73183
103	342.94	344.96	503.993	505.348		-2.02	-1.355		103	0.407902	0.560746
104	344.554	374.036	504.846	517.651		-29.482	-12.805		104	0.0891618	0.401873
105	344.875	375.335	505.06	479.969		-30.46	25.091		105	0.0778105	0.927695
106	346.173	358.402	505.726	487.54		-12.229	18.186		106	0.28941	0.831886
107	346.619	351.094	508.625	521.083		-4.475	-12.458		107	0.379408	0.406688
108	347.203	368.491	508.944	509.532		-21.288	-0.588		108	0.184266	0.571389
109	349.136	374.417	509.786	503.732		-25.281	6.054		109	0.137921	0.663549
110	351.202	360.067	510.719	525.755		-8.865	-15.036		110	0.328455	0.370917
111	351.713	338.658	511.208	489.214		13.055	21.994		111	0.582871	0.884723
112	351.972	370.175	511.405	512.496		-18.203	-1.091		112	0.220072	0.56441
113	352.982	351.318	512.28	486.906		1.664	25.374		113	0.45066	0.931622
114	353.765	334.603	514.344	505.398		19.162	8.946		114	0.653752	0.703677
115	354.779	356.985	514.382	543.637		-2.206	-29.255		115	0.405743	0.173623
116	355.589	365.821	514.488	511.571		-10.232	2.917		116	0.312589	0.620022
117	357.689	353.76	516.607	533.455		3.929	-16.848		117	0.476949	0.345775
118	358.014	342.752	517.669	535.546		15.262	-17.877		118	0.608487	0.331497
119	360.078	333.421	518.356	531.644		26.657	-13.288		119	0.740744	0.395171
120	361.184	369.428	518.494	518.179		-8.244	0.315		120	0.335662	0.583918
121	362.144	364.764	519.119	536.977		-2.62	-17.858		121	0.400938	0.331761
122	362.4	364.463	519.207	525.659		-2.063	-6.452		122	0.407403	0.490024
123	362.847	336.442	519.262	488.96		26.405	30.302		123	0.737819	1
124	366.19	330.313	523.6	549.421		35.877	-25.821		124	0.847756	0.221271
125	366.484	343.444	526.348	523.786		23.04	2.562		125	0.698763	0.615096
126	366.676	350.823	527.387	531.719		15.853	-4.332		126	0.615346	0.519439
127	367.642	367.93	527.709	527.174		-0.288	0.535		127	0.428004	0.586971
128	368.375	342.135	527.994	519.79		26.24	8.204		128	0.735904	0.693381
129	368.534	373.865	528.972	528.939		-5.331	0.033		129	0.369472	0.580006
130	373.086	352.863	530.831	543.94		20.223	-13.109		130	0.666067	0.397655
131	373.341	382.096	530.851	532.746		-8.755	-1.895		131	0.329731	0.553254
132	374.154	342.613	530.931	525.593		31.541	5.338		132	0.79743	0.653615
133	381.612	374.73	531.363	540.92		6.882	-9.557		133	0.511224	0.44694
134	388.083	345.58	532.163	537.12		42.503	-4.957		134	0.924662	0.510767
135	391.372	348.59	532.601	534.92		42.782	-2.319		135	0.9279	0.547371
136	397.775	353.125	534.762	524.67		44.65	10.092		136	0.949581	0.719578
137	404.256	367.551	538.685	534.393		36.705	4.292		137	0.857367	0.639101
138	406.714	371.348	539.903	527.947		35.366	11.956		138	0.841825	0.745442
139	415.119	366.125	542.143	530.612		48.994	11.531		139	1	0.739545
140	415.262	380.153	559.5	553.158		35.109	6.342		140	0.838843	0.667545

## Sheet: exp1-endosome10
endosome 10						dMFI				%dMFI
frame #	Rab7(rim)	Rab7(background)	Rab11(rim)	Rab11(background)		Rab7	Rab11		frame #	Rab7	Rab11
20	287.724	304.476	725.221	689.862		-16.752	35.359		20	0.313851	0.587664
21	296.566	306.12	772.478	699.964		-9.554	72.514		21	0.449167	0.73281
22	300.263	307.24	711.443	704.23		-6.977	7.213		22	0.497613	0.477711
23	298.888	308.569	743.451	710.415		-9.681	33.036		23	0.44678	0.578589
24	306.783	310.159	743.079	714.526		-3.376	28.553		24	0.565308	0.561076
25	300.101	310.935	735.986	714.59		-10.834	21.396		25	0.425104	0.533117
26	304.365	311.07	771.571	716.418		-6.705	55.153		26	0.502726	0.664989
27	302.959	311.175	731.171	722.714		-8.216	8.457		27	0.47432	0.482571
28	306.696	314.325	730.971	722.865		-7.629	8.106		28	0.485355	0.4812
29	310.605	314.755	777.571	732.133		-4.15	45.438		29	0.550758	0.627038
30	311.125	316.152	722.107	733.663		-5.027	-11.556		30	0.534271	0.40439
31	304.993	316.25	791.921	734.551		-11.257	57.37		31	0.417152	0.67365
32	313.559	316.38	808.946	735.71		-2.821	73.236		32	0.575742	0.735631
33	325.763	316.423	786.028	736.985		9.34	49.043		33	0.804358	0.641121
34	310.824	317.245	877.993	737.083		-6.421	140.91		34	0.508065	1
35	329.822	318.962	716.095	740.145		10.86	-24.05		35	0.832932	0.355582
36	336.115	321.025	741.027	740.765		15.09	0.262		36	0.912453	0.450557
37	313.763	321.726	773.196	741.11		-7.963	32.086		37	0.479077	0.574878
38	324.816	321.865	796.947	744.152		2.951	52.795		38	0.68425	0.655778
39	338.48	322.355	763.527	744.615		16.125	18.912		39	0.93191	0.523414
40	322.638	323.178	762.564	746.939		-0.54	15.625		40	0.618622	0.510573
41	322.211	323.399	762.521	747.949		-1.188	14.572		41	0.606441	0.506459
42	330.572	324.12	732.571	748.48		6.452	-15.909		42	0.750066	0.387385
43	336.007	325.663	771.635	750.915		10.344	20.72		43	0.823232	0.530477
44	327.622	327.23	740.379	756.321		0.392	-15.942		44	0.636143	0.387256
45	333.541	328.66	834.554	756.875		4.881	77.679		45	0.720532	0.752988
46	329.345	329.41	825.214	760.709		-0.065	64.505		46	0.627552	0.701523
47	328.412	331.41	748.405	764.175		-2.998	-15.77		47	0.572414	0.387928
48	333.973	332.745	793.28	767.09		1.228	26.19		48	0.651859	0.551845
49	341.967	333.524	795.736	767.546		8.443	28.19		49	0.787495	0.559658
50	347.947	333.799	817.321	767.556		14.148	49.765		50	0.894744	0.643941
51	327.77	334	763.364	770.862		-6.23	-7.498		51	0.511655	0.420243
52	339.059	334.971	775.068	771.155		4.088	3.913		52	0.705625	0.46482
53	338.414	336.101	793.399	771.17		2.313	22.229		53	0.672256	0.536372
54	338.081	336.23	773.223	774.5		1.851	-1.277		54	0.663571	0.444545
55	336.304	337.09	757.351	775.67		-0.786	-18.319		55	0.613998	0.37797
56	360.412	340.665	910.386	777.179		19.747	133.207		56	1	0.969908
57	323.75	340.867	836.513	778.926		-17.117	57.587		57	0.30699	0.674498
58	340.426	342.25	814.158	780.591		-1.824	33.567		58	0.594484	0.580664
59	330.709	343.95	813.23	782.686		-13.241	30.544		59	0.379855	0.568854
60	332.601	345.265	837.581	783.105		-12.664	54.476		60	0.390702	0.662345
61	342.831	345.395	755.15	783.985		-2.564	-28.835		61	0.580573	0.33689
62	346.457	346.745	816.664	784.314		-0.288	32.35		62	0.62336	0.575909
63	354.034	347.26	896.783	785.475		6.774	111.308		63	0.756119	0.88436
64	343.635	347.94	754.947	787.091		-4.305	-32.144		64	0.547844	0.323963
65	345.885	348.29	835.924	788.133		-2.405	47.791		65	0.583562	0.63623
66	341.693	348.301	761.546	788.404		-6.608	-26.858		66	0.504549	0.344613
67	346.338	348.31	758.408	790.49		-1.972	-32.082		67	0.591702	0.324205
68	360.655	348.38	823.365	791.19		12.275	32.175		68	0.859533	0.575226
69	329.85	348.929	824.899	791.755		-19.079	33.144		69	0.270106	0.579011
70	355.967	349.654	883.696	792.875		6.313	90.821		70	0.747453	0.804327
71	319.147	349.823	917.993	793.173		-30.676	124.82		71	0.0520923	0.937144
72	350.831	349.965	759.399	793.85		0.866	-34.451		72	0.645054	0.314951
73	341.993	350.276	795.128	798.845		-8.283	-3.717		73	0.473061	0.435013
74	342.378	350.7	722.615	800.785		-8.322	-78.17		74	0.472328	0.144162
75	350.229	351.398	767.408	801.495		-1.169	-34.087		75	0.606798	0.316373
76	350.105	351.457	900.965	802.78		-1.352	98.185		76	0.603358	0.833094
77	348.351	351.88	736.966	804.52		-3.529	-67.554		77	0.562432	0.185633
78	345.121	352.5	801.888	805.577		-7.379	-3.689		78	0.490055	0.435123
79	345.655	352.58	773.586	805.793		-6.925	-32.207		79	0.49859	0.323717
80	357.669	352.655	832.541	807.1		5.014	25.441		80	0.723033	0.548919
81	353.716	352.785	778.149	807.25		0.931	-29.101		81	0.646276	0.33585
82	350.318	353.45	825.838	812.665		-3.132	13.173		82	0.569895	0.500994
83	345.973	353.725	829.203	812.745		-7.752	16.458		83	0.483043	0.513827
84	343.764	354.45	917.579	813.375		-10.686	104.204		84	0.427887	0.856608
85	339.072	354.775	777.7	813.566		-15.703	-35.866		85	0.333571	0.309423
86	368.392	355.8	918.428	815.034		12.592	103.394		86	0.865492	0.853443
87	361.858	355.9	808	817.24		5.958	-9.24		87	0.740779	0.413438
88	330.432	355.931	840.229	817.607		-25.499	22.622		88	0.149415	0.537907
89	342.2	356.087	823.804	818.14		-13.887	5.664		89	0.367711	0.47166
90	343.311	356.39	820.628	819.215		-13.079	1.413		90	0.3829	0.455054
91	356.736	357.405	798.171	820.157		-0.669	-21.986		91	0.616197	0.363645
92	360.27	357.49	925.737	820.764		2.78	104.973		92	0.681035	0.859612
93	359.169	357.59	842.574	823.56		1.579	19.014		93	0.658458	0.523812
94	345.601	357.6	832.02	824.57		-11.999	7.45		94	0.403203	0.478637
95	342.407	357.745	775.143	828.796		-15.338	-53.653		95	0.340433	0.239938
96	357.806	357.93	757.311	830.02		-0.124	-72.709		96	0.626443	0.165495
97	352.079	358.388	830.655	834.305		-6.309	-3.65		97	0.51017	0.435275
98	358.493	358.64	810.128	835.765		-0.147	-25.637		98	0.62601	0.349383
99	351.671	360.719	779.132	837.149		-9.048	-58.017		99	0.45868	0.22289
100	365.331	361.15	835.25	838.95		4.181	-3.7		100	0.707373	0.43508
101	362.432	361.22	815.939	839.61		1.212	-23.671		101	0.651558	0.357063
102	349.48	361.505	899.059	840.495		-12.025	58.564		102	0.402715	0.678315
103	357.311	361.605	809.086	841.289		-4.294	-32.203		103	0.548051	0.323732
104	357.528	361.805	824.145	841.659		-4.277	-17.514		104	0.54837	0.381115
105	365.211	361.961	843.316	842.019		3.25	1.297		105	0.689871	0.454601
106	355.576	362.06	794.682	843.35		-6.484	-48.668		106	0.50688	0.259412
107	347.855	362.554	836.203	847.255		-14.699	-11.052		107	0.352446	0.406359
108	371.184	363.111	749.736	847.38		8.073	-97.644		108	0.780539	0.0680866
109	364.864	363.286	916.789	849.952		1.578	66.837		109	0.658439	0.710633
110	369.203	364.625	776.696	851.54		4.578	-74.844		110	0.714836	0.157155
111	360.561	364.645	808.297	855.035		-4.084	-46.738		111	0.551998	0.266951
112	353.136	365.607	740.662	855.735		-12.471	-115.073		112	0.39433	0
113	355.586	366.842	900.329	855.899		-11.256	44.43		113	0.417171	0.6231
114	356.709	366.96	843.608	857.55		-10.251	-13.942		114	0.436064	0.395069
115	353.791	367.335	915.421	858.067		-13.544	57.354		115	0.374159	0.673588
116	357.73	368.264	900.638	867.139		-10.534	33.499		116	0.430744	0.580398
117	363.414	369.139	849.507	868.51		-5.725	-19.003		117	0.521149	0.375298
118	373.095	369.215	757.664	870.133		3.88	-112.469		118	0.701714	0.0101726
119	349.007	369.5	840.878	870.19		-20.493	-29.312		119	0.243524	0.335026
120	368.311	370.765	899.77	872.197		-2.454	27.573		120	0.582641	0.557248
121	369.743	371.041	924.697	872.404		-1.298	52.293		121	0.604373	0.653817
122	346.095	371.085	881.934	876.562		-24.99	5.372		122	0.158984	0.47052
123	355.564	371.148	807.121	884.408		-15.584	-77.287		123	0.335809	0.147611
124	347.635	371.355	935.345	885.86		-23.72	49.485		124	0.182859	0.642847
125	364.836	371.668	806.454	886.452		-6.832	-79.998		125	0.500338	0.137021
126	365.196	372.665	863.52	888.445		-7.469	-24.925		126	0.488363	0.352164
127	367.5	372.957	856.439	889.34		-5.457	-32.901		127	0.526187	0.321006
128	389.421	373.539	900.797	889.46		15.882	11.337		128	0.927341	0.493822
129	387.108	373.635	905.5	889.9		13.473	15.6		129	0.882054	0.510475
130	357.514	375.335	884.061	890.27		-17.821	-6.209		130	0.293755	0.425278
131	375.993	375.68	917.304	892.23		0.313	25.074		131	0.634658	0.547486
132	374.324	375.735	853.191	895.149		-1.411	-41.958		132	0.602248	0.285624
133	366.02	377.072	905.039	896.132		-11.052	8.907		133	0.421006	0.484329
134	365.568	377.125	932.345	899.615		-11.557	32.73		134	0.411513	0.577394
135	369.721	378.214	847.365	904.985		-8.493	-57.62		135	0.469113	0.224441
136	368.457	378.908	884.789	905.304		-10.451	-20.515		136	0.432304	0.369392
137	372.676	379.276	872.885	905.67		-6.6	-32.785		137	0.5047	0.321459
138	347.178	379.322	871.628	907.8		-32.144	-36.172		138	0.0244952	0.308227
139	356.224	379.817	991.026	915.644		-23.593	75.382		139	0.185246	0.744014
140	379.471	380.031	909.039	919.389		-0.56	-10.35		140	0.618246	0.409101
141	397.574	380.96	909.322	919.731		16.614	-10.409		141	0.941102	0.408871
142	376.701	382.28	879.014	924.405		-5.579	-45.391		142	0.523894	0.272213
143	376.157	383.204	858.162	927.045		-7.047	-68.883		143	0.496297	0.180442
144	359.52	383.933	891.309	927.442		-24.413	-36.133		144	0.169831	0.30838
145	367.636	384.102	942.604	930.295		-16.466	12.309		145	0.319228	0.497619
146	371.929	384.77	955.046	931.183		-12.841	23.863		146	0.387375	0.542755
147	374.043	385.77	911.763	939.404		-11.727	-27.641		147	0.408317	0.341554
148	402.816	386.255	866.257	939.425		16.561	-73.168		148	0.940106	0.163702
149	376.036	386.796	852.25	939.796		-10.76	-87.546		149	0.426495	0.107534
150	385.474	386.851	986.211	940.312		-1.377	45.899		150	0.602888	0.628839
151	388.588	388.32	872.203	948.645		0.268	-76.442		151	0.633812	0.150912
152	380.905	388.71	878.811	950.31		-7.805	-71.499		152	0.482047	0.170222
153	403.514	390.105	908.007	958.715		13.409	-50.708		153	0.880851	0.251442
154	391.882	391.466	878.865	958.815		0.416	-79.95		154	0.636594	0.137208
155	377.414	391.582	932.039	959.328		-14.168	-27.289		155	0.362428	0.342929
156	390.257	392.926	943.507	960.561		-2.669	-17.054		156	0.578599	0.382912
157	395.23	396.043	913.638	966.793		-0.813	-53.155		157	0.61349	0.241883
158	401.342	397.941	947.439	971.43		3.401	-23.991		158	0.69271	0.355813
159	384.257	400.075	965.818	972.79		-15.818	-6.972		159	0.33141	0.422298
160	385.796	401.877	876.466	973.695		-16.081	-97.229		160	0.326465	0.0697078
161	393.236	402.015	937.682	974.075		-8.779	-36.393		161	0.463737	0.307364
162	379.447	402.683	951.434	974.913		-23.236	-23.479		162	0.191958	0.357813
163	385.581	406.945	878.928	982.26		-21.364	-103.332		163	0.22715	0.0458663
164	415.678	414.26	926.73	984.845		1.418	-58.115		164	0.655431	0.222507
165	413.092	416.615	1013.22	987.375		-3.523	25.848		165	0.562545	0.550509
166	411.145	418.848	947.892	994.06		-7.703	-46.168		166	0.483964	0.269178
167	399.622	426.96	911.845	995.625		-27.338	-83.78		167	0.114844	0.122246
168	412.079	427.639	900.428	1002.12		-15.56	-101.692		168	0.33626	0.052273
169	400.027	427.9	926.966	1003.88		-27.873	-76.919		169	0.104786	0.149049
170	400.358	433.805	976.178	1030.77		-33.447	-54.591		170	0	0.236274

[truncated: 41 more sheets: exp1-endosome11, exp1-endosome12, exp1-endosome13, exp1-endosome14, exp1-endosome15, exp1-endosome16, exp1-endosome17, exp1-time, exp1-aligned, exp2-endosome1, exp2-endosome2, exp2-endosome3, exp2-endosome4, exp2-endosome5, exp2-endosome6, exp2-endosome7, exp2-endosome8, exp2-endosome9, exp2-endosome10, exp2-endosome11 …]
