# Supplementary material for: A novel live-cell imaging assay reveals regulation of endosome maturation
Source: eLife. 2021 Nov 30;10:e70982. doi: 10.7554/eLife.70982 (PMC8635980; doi:10.7554/eLife.70982)
Supplement: Figure 8—source data 4. [file elife-70982-fig8-data4.xlsx]

## Sheet: 1
time (min)	1min				10min				20min				30min				40min				50min				60min				71min				81min				91min				102min				112min				123min
line profiles		Rab7	Rab11			Rab7	Rab11			Rab7	Rab11			Rab7	Rab11			Rab7	Rab11			Rab7	Rab11			Rab7	Rab11			Rab7	Rab11			Rab7	Rab11			Rab7	Rab11			Rab7	Rab11			Rab7	Rab11
	0	377.881	646.121		0	395.316	689.135		0	381.132	620.525		0	397.599	1223.23		0	461.804	1347.66		0	507.051	693.345		0	575.751	657.038		0	550.929	601.731		0	471.954	514.926		0	550.901	540.728		0	636.814	694.332		0	568.988	540.001		0
	0.10913	337.776	674.82		0.10913	370.229	754.064		0.10913	377.517	627.478		0.10913	378.537	1083.28		0.10913	453.073	1318.54		0.10913	486.532	624.696		0.10913	578.244	626.652		0.10913	586.097	623.566		0.10913	471.43	523.5		0.10913	542.274	566.67		0.10913	666.963	748.247		0.10913	604.409	561.823		0.10913
	0.21825	306.696	708.778		0.21825	361.028	874.06		0.21825	368.03	642.004		0.21825	374.569	882.873		0.21825	458.934	1123.76		0.21825	489.804	601.148		0.21825	585.719	623.51		0.21825	601.295	702.698		0.21825	463.865	545.718		0.21825	549.019	582.56		0.21825	665.396	764.932		0.21825	646.188	584.021		0.21825
	0.32738	292.491	773.652		0.32738	350.322	1029.74		0.32738	355.181	672.12		0.32738	377.458	722.925		0.32738	474.932	940.218		0.32738	494.798	567.907		0.32738	583.439	637.274		0.32738	610.199	774.237		0.32738	453.086	546.357		0.32738	543.414	615.403		0.32738	688.244	723.781		0.32738	666.716	614.777		0.32738
	0.43651	293.697	890.271		0.43651	346.246	1227.22		0.43651	348.406	734.143		0.43651	368.962	660.029		0.43651	482.032	854.545		0.43651	497.848	556.01		0.43651	594.525	657.789		0.43651	619.435	830.856		0.43651	455.052	563.362		0.43651	555.318	698.255		0.43651	700.524	642.585		0.43651	688.468	609.438		0.43651
	0.54563	289.999	1045.31		0.54563	339.522	1407.55		0.54563	345.314	816.234		0.54563	366.666	632.686		0.54563	463.011	861.974		0.54563	499.897	539.82		0.54563	588.046	700.738		0.54563	605.33	867.8		0.54563	461.283	582.135		0.54563	551.014	780.083		0.54563	700.992	628.141		0.54563	693.792	603.342		0.54563
	0.65476	294.417	1111.34		0.65476	338.011	1416.82		0.65476	343.998	847.375		0.65476	374.345	612.788		0.65476	461.676	838.048		0.65476	505.602	543.533		0.65476	577.191	780.269		0.65476	603.526	855.815		0.65476	448.964	605.955		0.65476	538.905	788.641		0.65476	679.092	614.904		0.65476	701.495	617.728		0.65476
	0.76389	286.933	1144.61		0.76389	329.62	1225.48		0.76389	341.796	843.578		0.76389	361.948	606.057		0.76389	451.387	759.053		0.76389	490.036	530.3		0.76389	565.531	964.271		0.76389	581.052	788.162		0.76389	462.356	656.207		0.76389	513.116	763.87		0.76389	629.776	634.926		0.76389	723.318	629.448		0.76389
	0.87302	278.965	1201.71		0.87302	325.364	948.963		0.87302	339.695	825.48		0.87302	367.088	610.917		0.87302	445.858	689.056		0.87302	472.611	523.384		0.87302	565.286	1233.76		0.87302	562.366	714.194		0.87302	488.012	678.293		0.87302	505.961	703.77		0.87302	588.889	670.71		0.87302	708.712	639.464		0.87302
	0.98214	280.344	1302.71		0.98214	332.385	757.8		0.98214	330.353	783.25		0.98214	358.751	604.601		0.98214	415.603	650.909		0.98214	477.78	535.895		0.98214	533.225	1358.08		0.98214	549.173	703.184		0.98214	516.296	700.722		0.98214	489.096	668.313		0.98214	562.485	666.567		0.98214	693.637	652.3		0.98214
	1.09127	288.799	1445.41		1.09127	330.325	718.587		1.09127	334.799	793.345		1.09127	359.495	590.534		1.09127	397.927	635.438		1.09127	451.962	558.605		1.09127	521.526	1213.2		1.09127	553.815	725.652		1.09127	562.883	721.98		1.09127	485.628	691.788		1.09127	542.309	700.861		1.09127	676.285	663.726		1.09127
	1.2004	289.117	1496.86		1.2004	323.711	753.46		1.2004	325.461	810.869		1.2004	355.231	606.811		1.2004	384.572	669.425		1.2004	441.65	573.839		1.2004	520.321	963.658		1.2004	561.48	761.684		1.2004	615.885	764.867		1.2004	463.66	703.274		1.2004	504.581	663.663		1.2004	666.561	646.122		1.2004
	1.30952	287.482	1360.88		1.30952	325.911	864.796		1.30952	327.627	834.124		1.30952	355.425	631.231		1.30952	375.67	676.987		1.30952	423.753	597.694		1.30952	525.35	852.532		1.30952	541.277	785.076		1.30952	660.171	804.182		1.30952	474.681	692.096		1.30952	481.725	643.723		1.30952	636.506	640.202		1.30952
	1.41865	294.704	1140.37		1.41865	336.242	1075.69		1.41865	329.074	833.11		1.41865	360.859	655.457		1.41865	366.286	713.837		1.41865	419.746	612.792		1.41865	550.671	816.633		1.41865	541.821	778.894		1.41865	712.989	866.743		1.41865	466.66	697.267		1.41865	488.445	629.223		1.41865	619.869	675.941		1.41865
	1.52778	291.474	1000.83		1.52778	343.275	1340.44		1.52778	341.649	807.583		1.52778	364.567	685.129		1.52778	355.845	692.84		1.52778	426.097	611.268		1.52778	569.042	822.23		1.52778	525.483	789.695		1.52778	702.085	900.767		1.52778	477.79	704.353		1.52778	501.869	654.714		1.52778	632.5	688.858		1.52778
	1.6369	294.493	997.027		1.6369	334.395	1594.91		1.6369	340.452	783.378		1.6369	356.701	721.956		1.6369	339.519	669.738		1.6369	421.804	623.687		1.6369	572.03	803.894		1.6369	498.707	784.658		1.6369	670.484	922.083		1.6369	481.409	709.824		1.6369	512.526	665.055		1.6369	654.704	713.095		1.6369
	1.74603	295.61	1096.43		1.74603	352.189	1686.56		1.74603	322.776	795.162		1.74603	360.658	749.95		1.74603	348.419	635.153		1.74603	423.797	643.113		1.74603	564.134	796.128		1.74603	494.872	815.291		1.74603	595.078	900.754		1.74603	482.974	709.799		1.74603	504.53	682.361		1.74603	679.955	780.679		1.74603
	1.85516	292.871	1183.96		1.85516	340.817	1657.22		1.85516	322.234	855.932		1.85516	370.739	771.464		1.85516	348.897	645.067		1.85516	419.063	655.022		1.85516	563.965	756.149		1.85516	501.584	845.944		1.85516	543.265	877.085		1.85516	491.339	730.497		1.85516	515.602	690.143		1.85516	687.702	870.947		1.85516
	1.96429	286.004	1237.71		1.96429	331.414	1658.15		1.96429	335.88	938.688		1.96429	382.365	801.789		1.96429	347.207	614.017		1.96429	430.984	660.387		1.96429	532.097	752.598		1.96429	500.339	874.405		1.96429	509.928	826.687		1.96429	500.793	739.572		1.96429	503.502	677.396		1.96429	669.797	1013.78		1.96429
	2.07341	289.445	1152.05		2.07341	327.024	1581.41		2.07341	359.553	951.751		2.07341	381.804	805.75		2.07341	353.241	640.335		2.07341	414.155	656.166		2.07341	531.013	731.072		2.07341	495.917	881.225		2.07341	484.171	805.316		2.07341	505.132	728.051		2.07341	501.782	677.085		2.07341	647.386	1239.24		2.07341
	2.18254	279.991	1004.19		2.18254	325.742	1354.53		2.18254	377.633	857.856		2.18254	387.336	805.102		2.18254	356.933	643.16		2.18254	422.148	648.157		2.18254	544.017	731.746		2.18254	498.573	830.294		2.18254	493.465	781.256		2.18254	506.946	735.818		2.18254	512.882	663.406		2.18254	625.279	1382.48		2.18254
	2.29167	285.284	874.939		2.29167	335.025	1104.29		2.29167	383.279	759.098		2.29167	396.678	823.278		2.29167	363.549	695.781		2.29167	411.696	681.744		2.29167	556.132	714.29		2.29167	499.394	758.35		2.29167	467.72	749.012		2.29167	515.664	767.889		2.29167	514.721	682.735		2.29167	608.83	1312.66		2.29167
	2.40079	295.237	782.82		2.40079	341.094	925.565		2.40079	395.565	716.471		2.40079	405.91	848.835		2.40079	360.137	741.24		2.40079	410.414	661.709		2.40079	549.962	704.792		2.40079	514.464	695.999		2.40079	462.864	730.852		2.40079	503.469	774.742		2.40079	522.097	685.897		2.40079	582.624	1107.18		2.40079
	2.50992	292.235	766.739		2.50992	330.541	827.095		2.50992	380.135	703.994		2.50992	408.898	847.801		2.50992	367.107	774.859		2.50992	409.488	670.583		2.50992	559.276	709.823		2.50992	507.179	666.072		2.50992	459.641	720.476		2.50992	500.213	810.515		2.50992	523.167	695.524		2.50992	566.415	878.976		2.50992
	2.61905	286.842	753.476		2.61905	329.942	808.756		2.61905	367.98	711.859		2.61905	406.67	832.04		2.61905	376.262	767.67		2.61905	414.912	659.582		2.61905	564.36	710.299		2.61905	543.841	682.175		2.61905	453.999	687.906		2.61905	512.451	807.854		2.61905	534.719	704.531		2.61905	560.806	773.5		2.61905
	2.72817	297.112	753.232		2.72817	335.213	795.597		2.72817	362.819	723.022		2.72817	408.177	807.911		2.72817	359.853	737.715		2.72817	416.406	669.753		2.72817	570.385	707.411		2.72817	562.611	696.026		2.72817	440.925	694.151		2.72817	526.426	809.04		2.72817	525.25	692.467		2.72817	548.599	728.852		2.72817
	2.8373	306.512	745.339		2.8373	330.076	780.302		2.8373	365.051	726.601		2.8373	396.84	795.367		2.8373	352.383	681.426		2.8373	423.338	648.846		2.8373	563.018	729.188		2.8373	586.507	695.988		2.8373	459.222	694.541		2.8373	521.783	814.651		2.8373	515.997	687.687		2.8373	554.709	722.666		2.8373
	2.94643	314.381	748.376		2.94643	336.717	757.701		2.94643	358.036	702.839		2.94643	394.114	744.738		2.94643	356.335	615.629		2.94643	412.832	657.531		2.94643	577.76	734.81		2.94643	598.7	695.288		2.94643	446.516	699.963		2.94643	516.414	804.465		2.94643	507.038	681.298		2.94643	549.98	716.248		2.94643
	3.05556	319.047	722.797		3.05556	338.036	763.98		3.05556	361.048	711.329		3.05556	386.931	717.28		3.05556	356.516	600.147		3.05556	412.306	658.886		3.05556	560.639	744.734		3.05556	628.72	705.511		3.05556	441.271	729.626		3.05556	510.827	776.9		3.05556	529.329	685.166		3.05556	561.913	716.305		3.05556
	3.16468	334.262	737.191		3.16468	362.81	800.094		3.16468	369.877	683.288		3.16468	376.864	695.992		3.16468	372.33	589.763		3.16468	413.261	647.138		3.16468	553.143	755.796		3.16468	657.486	707.534		3.16468	454.469	779.096		3.16468	503.901	744.9		3.16468	533.394	682.011		3.16468	569.441	725.047		3.16468
	3.27381	345.339	734.507		3.27381	393.978	864.294		3.27381	351.799	671.685		3.27381	373.894	696.528		3.27381	374.694	584.441		3.27381	428.834	649.125		3.27381	570.361	767.521		3.27381	654.469	721.715		3.27381	459.293	844.653		3.27381	503.367	736.798		3.27381	542.317	677.803		3.27381	570.515	733.667		3.27381
	3.38294	340.009	767.013		3.38294	403.047	894.824		3.38294	354.04	663.33		3.38294	370.984	693.804		3.38294	370.715	582.256		3.38294	425.703	636.009		3.38294	547.451	746.717		3.38294	641.49	723.562		3.38294	463.306	858.509		3.38294	517.876	719.935		3.38294	533.149	683.597		3.38294	584.047	741.614		3.38294
	3.49206	354.869	825.74		3.49206	413.235	862		3.49206	365.37	650.178		3.49206	369.885	733.044		3.49206	372.815	576.728		3.49206	414.725	644.559		3.49206	538.308	722.725		3.49206	633.795	711.404		3.49206	479.074	815.386		3.49206	509.045	690.142		3.49206	548.374	687.076		3.49206	586.202	737.991		3.49206
	3.60119	364.855	888.984		3.60119	426.115	796.738		3.60119	368.254	618.686		3.60119	373.246	761.592		3.60119	375.468	590.471		3.60119	417.596	637.233		3.60119	548.638	693.524		3.60119	600.2	709.508		3.60119	487.486	755.507		3.60119	497.556	692.91		3.60119	559.129	688.216		3.60119	594.718	727.439		3.60119
	3.71032	366.845	898.23		3.71032	400.225	725.407		3.71032	366.075	599.001		3.71032	384.503	742.007		3.71032	394.331	610.487		3.71032	420.439	642.756		3.71032	539.948	679.966		3.71032	578.763	693.107		3.71032	489.468	697.708		3.71032	507.3	678.844		3.71032	566.632	676.024		3.71032	587.421	733.198		3.71032
	3.81944	356.587	810.761		3.81944	390.253	690.195		3.81944	372.765	619.217		3.81944	374.893	705.106		3.81944	385.566	605.309		3.81944	408.45	639.8		3.81944	550.443	663.586		3.81944	562.918	644.509		3.81944	494.384	667.439		3.81944	501.088	684.995		3.81944	586.742	658.014		3.81944	586.923	720.519		3.81944
	3.92857	352.911	718.392		3.92857	363.793	663.858		3.92857	375.41	602.163		3.92857	382.475	692.068		3.92857	388.655	631.957		3.92857	411.577	640.884		3.92857	551.07	645.622		3.92857	539.365	636.771		3.92857	517.375	663.842		3.92857	495.818	669.103		3.92857	589.812	661.925		3.92857	581.332	712.154		3.92857
	4.0377	336.003	650.838		4.0377	356.406	671.916		4.0377	367.484	595.661		4.0377	377.078	701.364		4.0377	397.75	650.05		4.0377	403.357	623.313		4.0377	542.313	646.339		4.0377	523.953	639.818		4.0377	519.446	646.634		4.0377	494.438	670.873		4.0377	564.338	650.005		4.0377	562.704	683.973		4.0377
	4.14683	328.73	642.902		4.14683	339.391	660.122		4.14683	370.435	573.758		4.14683	385.34	776.952		4.14683	394.995	656.511		4.14683	417.649	597.6		4.14683	554.766	626.999		4.14683	518.873	632.955		4.14683	523.202	643.108		4.14683	491.24	656.428		4.14683	521.8	648.05		4.14683	532.663	652.005		4.14683
	4.25595	332.123	614.872		4.25595	362.07	676.126		4.25595	366.594	578.062		4.25595	401.932	942.372		4.25595	412.604	658.547		4.25595	413.865	607.296		4.25595	550.619	631.843		4.25595	523.939	637.057		4.25595	503.695	671.755		4.25595	493.505	645.075		4.25595	499.105	624.336		4.25595	522.332	620.934		4.25595
	4.36508	336.316	622.815		4.36508	373.201	703.174		4.36508	374.423	581.595		4.36508	406.944	1126.52		4.36508	459.647	648.961		4.36508	416.802	588.269		4.36508	556.742	665.167		4.36508	529.459	637.787		4.36508	477.07	724.299		4.36508	478.972	639.362		4.36508	493.693	611.449		4.36508	515.883	601.868		4.36508
	4.47421	349.99	625.114		4.47421	404.908	729.158		4.47421	384.005	607.824		4.47421	417.052	1179.03		4.47421	471.471	627.686		4.47421	422.692	567.609		4.47421	556.948	657.657		4.47421	532.247	656.093		4.47421	464.535	792.605		4.47421	474.657	629.538		4.47421	496.264	587.891		4.47421	534.302	600.59		4.47421
	4.58333	350.566	637.681		4.58333	453.853	796.987		4.58333	385.069	600.293		4.58333	440.678	998.122		4.58333	460.641	617.711		4.58333	420.865	581.161		4.58333	559.93	673.75		4.58333	530.648	674.606		4.58333	459.677	862.784		4.58333	470.779	628.013		4.58333	503.362	584.454		4.58333	537.154	578.227		4.58333
	4.69246	368.288	669.713		4.69246	506.466	829.11		4.69246	393.019	575.363		4.69246	454.652	773.664		4.69246	453.236	617.458		4.69246	430.283	631.561		4.69246	562.488	665.868		4.69246	531.161	658.733		4.69246	442.726	872.365		4.69246	472.502	626.686		4.69246	506	578.417		4.69246	537.946	577.678		4.69246
	4.80159	394.826	702.517		4.80159	540.597	846.203		4.80159	384.77	601.889		4.80159	442.52	640.58		4.80159	415.07	582.93		4.80159	430.426	680.769		4.80159	578.232	670.968		4.80159	529.12	650.28		4.80159	444.679	819.039		4.80159	501.478	637.167		4.80159	498.012	577.015		4.80159	536.13	568.303		4.80159
	4.91071	398.476	724.378		4.91071	510.613	786.126		4.91071	367.43	634.296		4.91071	418.451	585.562		4.91071	400.078	570.059		4.91071	440.9	676.206		4.91071	593.547	666.073		4.91071	515.307	633.749		4.91071	457.316	743.875		4.91071	523.212	635.184		4.91071	481.24	552.186		4.91071	513.046	563.699		4.91071
	5.01984	380.814	725.823		5.01984	484.571	701.414		5.01984	361.714	621.449		5.01984	403.056	554.437		5.01984	398.903	553.493		5.01984	459.152	628.418		5.01984	604.244	670.01		5.01984	507.749	605.052		5.01984	472.871	694.528		5.01984	536.786	631.164		5.01984	465.27	544.749		5.01984	506.246	555.05		5.01984
	5.12897	341.609	679.711		5.12897	428.427	643.076		5.12897	351.679	578.82		5.12897	398.119	528.534		5.12897	412.935	537.772		5.12897	460.047	554.996		5.12897	593.001	651.533		5.12897	507.155	579.446		5.12897	485.87	670.874		5.12897	526.876	612.46		5.12897	458.526	548.626		5.12897	492.389	546.675		5.12897
	5.2381	322.568	625.522		5.2381	382.114	620.159		5.2381	349	520.432		5.2381	406.355	514.161		5.2381	426.829	535.635		5.2381	477.189	536.426		5.2381	585.386	676.673		5.2381	502.292	582.22		5.2381	482.378	657.938		5.2381	520.859	586.694		5.2381	447.321	560.675		5.2381	479.642	545.491		5.2381
	5.34722	302.362	589.385		5.34722	366.146	627.318		5.34722	357.377	481.92		5.34722	389.277	515.833		5.34722	432.082	526.763		5.34722	477.318	510.485		5.34722	579.074	683.75		5.34722	487.795	565.754		5.34722	471.227	656.724		5.34722	473.027	606.921		5.34722	430.526	556.859		5.34722	473.586	529.593		5.34722
	5.45635	286.5	578.495		5.45635	356.165	661.207		5.45635	349.245	478.957		5.45635	408.964	514.03		5.45635	438.666	520.587		5.45635	472.298	501.11		5.45635	555.865	690.651		5.45635	503.421	569.419		5.45635	468.998	633.282		5.45635	453.558	588.769		5.45635	449.029	560.099		5.45635	453.036	531.49		5.45635
	5.56548	290.44	560.018		5.56548	340.146	686.559		5.56548	338.954	466.338		5.56548	402.843	546.408		5.56548	427.708	528.74		5.56548	476.777	505.268		5.56548	538.5	724.596		5.56548	504.208	562.635		5.56548	456.296	632.024		5.56548	453.756	578.258		5.56548	458.974	565.465		5.56548	451.232	541.352		5.56548
	5.6746	293.86	556.631		5.6746	340.311	681.267		5.6746	322.632	464.863		5.6746	399.157	614.107		5.6746	431.117	526.572		5.6746	463.908	502.873		5.6746	537.691	695.883		5.6746	515.155	567.128		5.6746	444.46	604.359		5.6746	454.635	564.898		5.6746	479.392	560.222		5.6746	441.498	511.943		5.6746
	5.78373	289.137	553.737		5.78373	337.545	710.247		5.78373	335.079	469.13		5.78373	398.865	725.349		5.78373	411.263	562.111		5.78373	461.274	511.833		5.78373	545.672	676.461		5.78373	526.499	573.824		5.78373	440.269	596.886		5.78373	453.696	577.527		5.78373	484.462	570.271		5.78373	438.178	498.28		5.78373
	5.89286	299.389	561.769		5.89286	326.292	773.15		5.89286	326.951	480.801		5.89286	406.779	774.455		5.89286	396.929	602.248		5.89286	464.222	490.218		5.89286	554.91	674.561		5.89286	547.053	581.479		5.89286	434.263	613.753		5.89286	449.149	584.013		5.89286	493.031	541.597		5.89286	458.817	505.714		5.89286
	6.00198	306.071	573.919		6.00198	317.934	790.843		6.00198	342.672	488.665		6.00198	398.485	709.377		6.00198	375.352	610.163		6.00198	444.574	479.396		6.00198	564.526	682.032		6.00198	565.481	588.108		6.00198	431.495	607.004		6.00198	443.934	586.169		6.00198	473.602	519.258		6.00198	492.876	527.357		6.00198
	6.11111	309.993	557.44		6.11111	313.765	724.445		6.11111	344.509	485.927		6.11111	393.453	599.82		6.11111	369.486	566.687		6.11111	430.19	489.713		6.11111	584.601	717.745		6.11111	570.089	608.54		6.11111	456.31	623.4		6.11111	439.761	607.955		6.11111	453.269	478.134		6.11111	515.543	539.652		6.11111
	6.22024	316.026	540.288		6.22024	310.042	619.581		6.22024	354.025	484.505		6.22024	381.437	546.318		6.22024	350.116	521.235		6.22024	424.627	501.432		6.22024	601.549	774.135		6.22024	576.71	606.685		6.22024	476.205	616.62		6.22024	444.703	621.014		6.22024	458.554	451.724		6.22024	544.202	542.742		6.22024
	6.32937	316.044	528.763		6.32937	316.749	553.942		6.32937	375.699	496.192		6.32937	384.363	512.635		6.32937	337.768	502.825		6.32937	428.727	511.962		6.32937	618.286	817.796		6.32937	581.401	601.989		6.32937	469.74	604.963		6.32937	453.826	681.064		6.32937	474.637	448.221		6.32937	559.474	520.002		6.32937
	6.43849	317.793	515.149		6.43849	320.436	543.527		6.43849	395.53	502.831		6.43849	383.581	507.267		6.43849	332.623	511.116		6.43849	416.792	545.278		6.43849	620.993	875.019		6.43849	579.602	599.87		6.43849	467.868	574.697		6.43849	437.745	720.926		6.43849	510.723	439.637		6.43849	568.729	511.219		6.43849
	6.54762	319.743	509.153		6.54762	316.495	528.772		6.54762	397.658	542.517		6.54762	420.289	527.233		6.54762	340.593	515.115		6.54762	414.998	561.447		6.54762	616.214	887.195		6.54762	570.577	592.898		6.54762	458.802	555.238		6.54762	450.231	693.834		6.54762	534.732	441.777		6.54762	592.467	518.254		6.54762
	6.65675	332.581	504.606		6.65675	312.014	536.328		6.65675	413.705	606.005		6.65675	431.174	537.143		6.65675	342.661	547.118		6.65675	418.657	594.351		6.65675	584.144	797.163		6.65675	554.895	590.454		6.65675	464.448	542.912		6.65675	466.505	597.199		6.65675	560.276	423.194		6.65675	566.671	505.746		6.65675
	6.76587	339.038	500.007		6.76587	327.299	560.477		6.76587	405.152	715.225		6.76587	449.142	570.289		6.76587	370.861	612.516		6.76587	411.519	626.039		6.76587	557.997	669.463		6.76587	552.619	585.205		6.76587	470.478	532.303		6.76587	464.805	569.612		6.76587	561.519	417.342		6.76587	542.688	495.282		6.76587
	6.875	364.673	502.455		6.875	346.279	565.971		6.875	419.138	832.742		6.875	465.798	618.593		6.875	384.714	670.832		6.875	413.211	652.562		6.875	546.745	594.652		6.875	549.317	597.172		6.875	461.294	539.895		6.875	488.391	514.527		6.875	546.979	421.926		6.875	529.633	495.524		6.875
	6.98413	398.351	523.767		6.98413	350.239	558.073		6.98413	406.233	917.922		6.98413	483.812	659.716		6.98413	414.684	739.043		6.98413	411.213	630.744		6.98413	527.242	567.174		6.98413	530.758	619.078		6.98413	461.999	562.371		6.98413	507.322	486.908		6.98413	536.245	421.291		6.98413	521.972	489.68		6.98413
	7.09325	445.917	524.043		7.09325	354.201	574.706		7.09325	400.357	893.177		7.09325	486.338	701.516		7.09325	448.598	777.515		7.09325	420.003	608.224		7.09325	506.049	570.507		7.09325	536.177	644.362		7.09325	470.038	586.587		7.09325	508.876	482.786		7.09325	532.837	430.598		7.09325	513.152	479.767
	7.20238	479.853	529.596		7.20238	388.984	592.334		7.20238	397.764	781.488		7.20238	482.185	703.803		7.20238	477.359	794.801		7.20238	436.02	586.766		7.20238	495.054	563.499		7.20238	523.171	631.942		7.20238	462.135	613.97		7.20238	500.622	471.36		7.20238	532.098	439.247		7.20238	503.58	465.941
	7.31151	472.378	533.671		7.31151	418.656	632.612		7.31151	399.263	682.795		7.31151	480.251	721.626		7.31151	489.888	807.157		7.31151	442.081	578.23		7.31151	502.728	571.62		7.31151	499.992	641.056		7.31151	466.666	615.936		7.31151	517.246	476.583		7.31151	536.661	443.984		7.31151	506.702	477.692
	7.42063	445.266	537.523		7.42063	430.029	623.476		7.42063	398.315	638.37		7.42063	464.964	743.059		7.42063	485.399	850.506		7.42063	446.708	560.18		7.42063	505.581	580.543		7.42063	518.094	681.616		7.42063	438.943	575.041		7.42063	534.872	486.178		7.42063	535.227	463.342		7.42063	497.625	469.95
	7.52976	434.815	555.618		7.52976	448.622	628.049		7.52976	394.22	617.071		7.52976	437.161	755.495		7.52976	474.907	970.009		7.52976	448.911	566.167		7.52976	501.244	587.372		7.52976	511.363	714.617		7.52976	440.62	512.723		7.52976	530.445	502.333		7.52976	536.679	476.887		7.52976	529.067	471.024
	7.63889	434.1	580.152		7.63889	447.93	649.93		7.63889	391.291	620.977		7.63889	435.706	814.427		7.63889	465.331	1143.37		7.63889	445.357	552.927		7.63889	506.703	588.949		7.63889	526.935	711.967		7.63889	442.947	479.795		7.63889	542.41	530.242		7.63889	546.389	504.627		7.63889	534.68	478.872
	7.74802	425.541	621.541		7.74802	430.836	666.623						7.74802	434.199	949.617		7.74802	471.546	1316.47		7.74802	433.901	577.928		7.74802	519.68	615.006		7.74802	517.427	693.345		7.74802	446.052	469.736		7.74802	558.858	588.161		7.74802	552.547	533.35		7.74802	542.906	519.757
	7.85714	395.841	642.245		7.85714	412.235	688.307						7.85714	412.149	1144.35						7.85714	447.987	626.059		7.85714	531.25	639.729		7.85714	515.114	660.522		7.85714	437.737	497.975		7.85714	586.828	627.766		7.85714	564.431	549.445		7.85714	573.385	539.492
													7.96627	401.67	1217.4						7.96627	473.908	680.902		7.96627	560.303	707.373		7.96627	526.124	639.038		7.96627	452.611	528.022		7.96627	607.116	637.427		7.96627	585.623	575.01
																					8.0754	488.287	769.845		8.0754	565.524	774.224		8.0754	529.122	613.121		8.0754	452.934	564.72		8.0754	623.164	622.419		8.0754	608.323	604.898
																					8.18452	510.836	805.661		8.18452	565.897	839.115		8.18452	540.631	588.082		8.18452	457.351	563.662		8.18452	628.293	597.499		8.18452	631.365	676.066
																					8.29365	516.955	769.773		8.29365	566.632	817.659		8.29365	553.526	591.721		8.29365	468.222	531.848		8.29365	648.805	573.325
																					8.40278	508.931	703.927		8.40278	568.388	737.057		8.40278	548.65	578.285		8.40278	467.064	536.469		8.40278	616.521	547.482
																									8.5119	579.808	680.871		8.5119	556.59	575.427		8.5119	477.233	535.302		8.5119	629.164	533.967
																													8.62103	564.98	573.786		8.62103	491.234	525.118		8.62103	608.03	536.682
																													8.73016	547.521	595.441		8.73016	479.599	513.452		8.73016	587.102	521.485
																													8.83929	544.979	594.044		8.83929	480.225	525.79		8.83929	559.014	515.647
																																	8.94841	479.871	524.68
	mean	332.843	770.485			366.591	842.72			364.33	672.6			399.409	731.799			403.38	694.249			442.468	606.126			558.09	729.3			547.818	673.232			483.118	661.14			511.304	645.901			535.84	600.645			571.354	649.538
	MIN	278.965	500.007			310.042	528.772			322.234	464.863			355.231	507.267			332.623	502.825			403.357	479.396			495.054	563.499			487.795	562.635			431.495	469.736			437.745	471.36			430.526	417.342			438.178	465.941
	MAX	479.853	1496.86			540.597	1686.56			419.138	951.751			486.338	1223.23			489.888	1347.66			516.955	805.661			620.993	1358.08			657.486	881.225			712.989	922.083			648.805	814.651			700.992	764.932			723.318	1382.48
	MIN	278.965	400.582			278.965	400.582			278.965	400.582			278.965	400.582			278.965	400.582			278.965	400.582			278.965	400.582			278.965	400.582			278.965	400.582			278.965	400.582			278.965	400.582			278.965	400.582
	MAX	723.318	1686.56			723.318	1686.56			723.318	1686.56			723.318	1686.56			723.318	1686.56			723.318	1686.56			723.318	1686.56			723.318	1686.56			723.318	1686.56			723.318	1686.56			723.318	1686.56			723.318	1686.56
Rab7 and Rab11 normalised for individual min-max
	1min				10min				20min				30min				40min				50min				60min				71min				81min				91min				102min				112min				123min
		Rab7	Rab11			Rab7	Rab11			Rab7	Rab11			Rab7	Rab11			Rab7	Rab11			Rab7	Rab11			Rab7	Rab11			Rab7	Rab11			Rab7	Rab11			Rab7	Rab11			Rab7	Rab11			Rab7	Rab11
	0	0.492394	0.146576		0	0.369864	0.138508		0	0.607797	0.319708		0	0.323156	1		0	0.821422	1		0	0.912815	0.655752		0	0.640763	0.117721		0	0.372053	0.122716		0	0.14373	0.0999012		0	0.536132	0.202068		0	0.762713	0.796887		0	0.458757	0.0808041		0
	0.10913	0.292755	0.175365		0.10913	0.261053	0.194588		0.10913	0.570496	0.333989		0.10913	0.177763	0.804531		0.10913	0.765905	0.965526		0.10913	0.732187	0.445344		0.10913	0.660558	0.0794793		0.10913	0.5793	0.191252		0.10913	0.141868	0.118856		0.10913	0.495257	0.277636		0.10913	0.874184	0.951998		0.10913	0.58298	0.104613		0.10913
	0.21825	0.138042	0.20943		0.21825	0.221145	0.29823		0.21825	0.472594	0.363823		0.21825	0.147498	0.524615		0.21825	0.803173	0.73497		0.21825	0.760991	0.373169		0.21825	0.719912	0.0755251		0.21825	0.668863	0.439634		0.21825	0.114994	0.167973		0.21825	0.527215	0.323923		0.21825	0.86839	1		0.21825	0.729501	0.128833		0.21825
	0.32738	0.0673311	0.274509		0.32738	0.174709	0.432695		0.32738	0.340003	0.425677		0.32738	0.169533	0.301213		0.32738	0.904899	0.517723		0.32738	0.804953	0.271286		0.32738	0.701808	0.0928473		0.32738	0.721335	0.664183		0.32738	0.0767015	0.169385		0.32738	0.500659	0.419594		0.32738	0.952867	0.881611		0.32738	0.801494	0.162389		0.32738
	0.43651	0.0733344	0.391497		0.43651	0.15703	0.603259		0.43651	0.270086	0.553064		0.43651	0.104731	0.213365		0.43651	0.950046	0.416316		0.43651	0.831802	0.234821		0.43651	0.789835	0.118666		0.43651	0.775763	0.8419		0.43651	0.0836856	0.206978		0.43651	0.55706	0.660941		0.43651	0.99827	0.648013		0.43651	0.877779	0.156564		0.43651
	0.54563	0.0549261	0.547021		0.54563	0.127865	0.759012		0.54563	0.238181	0.721667		0.54563	0.0872188	0.175175		0.54563	0.829097	0.425109		0.54563	0.849839	0.185199		0.54563	0.738389	0.172718		0.54563	0.692641	0.957861		0.54563	0.105821	0.24848		0.54563	0.536667	0.899304		0.54563	1	0.606459		0.54563	0.896451	0.149913		0.54563
	0.65476	0.0769185	0.613266		0.65476	0.121312	0.767018		0.65476	0.224593	0.785626		0.65476	0.145789	0.147383		0.65476	0.820609	0.396789		0.65476	0.90006	0.196579		0.65476	0.652197	0.272809		0.65476	0.68201	0.920242		0.65476	0.0620582	0.301138		0.65476	0.479295	0.924233		0.65476	0.919029	0.568377		0.65476	0.923466	0.165609		0.65476
	0.76389	0.0396639	0.646642		0.76389	0.0849168	0.601758		0.76389	0.201874	0.777828		0.76389	0.051233	0.137982		0.76389	0.755184	0.303286		0.76389	0.763033	0.15602		0.76389	0.559612	0.50438		0.76389	0.54957	0.707891		0.76389	0.109633	0.41223		0.76389	0.357107	0.852076		0.76389	0.736691	0.625979		0.76389	1	0.178396		0.76389
	0.87302	0	0.703916		0.87302	0.066457	0.362925		0.87302	0.180196	0.740657		0.87302	0.0904376	0.14477		0.87302	0.720027	0.220434		0.87302	0.609641	0.134823		0.87302	0.557667	0.843536		0.87302	0.439452	0.475718		0.87302	0.200775	0.461055		0.87302	0.323207	0.677006		0.87302	0.585519	0.728928		0.87302	0.948776	0.189324		0.87302
	0.98214	0.00686452	0.805239		0.98214	0.0969096	0.197815		0.98214	0.083793	0.653922		0.98214	0.0268483	0.135948		0.98214	0.527644	0.175281		0.98214	0.655144	0.173169		0.98214	0.303091	1		0.98214	0.361705	0.441159		0.98214	0.301253	0.510639		0.98214	0.2433	0.57372		0.98214	0.487895	0.717009		0.98214	0.895907	0.203329		0.98214
	1.09127	0.0489527	0.948389		1.09127	0.0879747	0.163946		1.09127	0.129667	0.674656		1.09127	0.0325231	0.1163		1.09127	0.415248	0.156968		1.09127	0.427868	0.242775		1.09127	0.210197	0.817659		1.09127	0.38906	0.511683		1.09127	0.466752	0.557634		1.09127	0.226869	0.642102		1.09127	0.413298	0.815671		1.09127	0.835053	0.215796		1.09127
	1.2004	0.0505356	1		1.2004	0.0592874	0.194066		1.2004	0.033303	0.710648		1.2004	0	0.139035		1.2004	0.330328	0.197197		1.2004	0.337092	0.289467		1.2004	0.200629	0.503608		1.2004	0.43423	0.624781		1.2004	0.655041	0.652444		1.2004	0.122785	0.675561		1.2004	0.273805	0.708654		1.2004	0.80095	0.196589		1.2004
	1.30952	0.0423968	0.863596		1.30952	0.0688296	0.290229		1.30952	0.055657	0.758411		1.30952	0.00147971	0.173143		1.30952	0.273723	0.206148		1.30952	0.179545	0.362583		1.30952	0.240561	0.363754		1.30952	0.315173	0.698205		1.30952	0.812365	0.739357		1.30952	0.175002	0.643		1.30952	0.189299	0.651287		1.30952	0.695546	0.19013		1.30952
	1.41865	0.0783471	0.642388		1.41865	0.113639	0.472378		1.41865	0.0705841	0.756328		1.41865	0.0429268	0.206979		1.41865	0.214053	0.249766		1.41865	0.144272	0.408858		1.41865	0.441619	0.318574		1.41865	0.318379	0.6788		1.41865	1	0.87766		1.41865	0.136999	0.658063		1.41865	0.214145	0.609572		1.41865	0.637199	0.229123		1.41865
	1.52778	0.0622685	0.502404		1.52778	0.144143	0.701053		1.52778	0.200362	0.703899		1.52778	0.071209	0.248423		1.52778	0.147662	0.224913		1.52778	0.20018	0.404187		1.52778	0.587491	0.325618		1.52778	0.222098	0.712703		1.52778	0.961264	0.952877		1.52778	0.189733	0.678704		1.52778	0.263778	0.682908		1.52778	0.681497	0.243216		1.52778
	1.6369	0.0772968	0.49859		1.6369	0.105628	0.920836		1.6369	0.188001	0.654185		1.6369	0.0112122	0.29986		1.6369	0.0438496	0.197568		1.6369	0.162388	0.442251		1.6369	0.611217	0.302542		1.6369	0.0643051	0.696893		1.6369	0.849002	1		1.6369	0.20688	0.694641		1.6369	0.30318	0.712659		1.6369	0.759367	0.26966		1.6369
	1.74603	0.0828571	0.598307		1.74603	0.182807	1		1.74603	0.00559418	0.678388		1.74603	0.0413937	0.338959		1.74603	0.100442	0.156631		1.74603	0.179933	0.501791		1.74603	0.54852	0.292768		1.74603	0.0417052	0.793044		1.74603	0.581124	0.952848		1.74603	0.214295	0.694568		1.74603	0.273617	0.762447		1.74603	0.847924	0.343399		1.74603
	1.85516	0.0692227	0.686116		1.85516	0.133482	0.974655		1.85516	0	0.803201		1.85516	0.118285	0.369008		1.85516	0.103481	0.168366		1.85516	0.138259	0.538292		1.85516	0.547178	0.242454		1.85516	0.0812595	0.889259		1.85516	0.39706	0.900523		1.85516	0.253928	0.754861		1.85516	0.314553	0.784836		1.85516	0.875093	0.441887		1.85516
	1.96429	0.0350394	0.740031		1.96429	0.0926981	0.975462		1.96429	0.140823	0.97317		1.96429	0.206961	0.411364		1.96429	0.0927352	0.131613		1.96429	0.2432	0.554736		1.96429	0.294134	0.237985		1.96429	0.0739226	0.978593		1.96429	0.278631	0.789109		1.96429	0.298721	0.781296		1.96429	0.269816	0.748163		1.96429	0.812299	0.597731		1.96429
	2.07341	0.0521684	0.654103		2.07341	0.073657	0.909183		2.07341	0.385116	1		2.07341	0.202682	0.416896		2.07341	0.131104	0.162765		2.07341	0.0950545	0.541799		2.07341	0.285527	0.210894		2.07341	0.0478635	1		2.07341	0.18713	0.741864		2.07341	0.319279	0.747736		2.07341	0.263456	0.747268		2.07341	0.733703	0.843713		2.07341
	2.18254	0.00510732	0.505774		2.18254	0.0680965	0.713216		2.18254	0.571693	0.807153		2.18254	0.244876	0.415991		2.18254	0.15458	0.166109		2.18254	0.165417	0.517251		2.18254	0.388783	0.211742		2.18254	0.0635154	0.840136		2.18254	0.220147	0.688675		2.18254	0.327874	0.770361		2.18254	0.304497	0.707914		2.18254	0.656172	1		2.18254
	2.29167	0.0314553	0.376116		2.29167	0.10836	0.497079		2.29167	0.629959	0.604318		2.29167	0.316131	0.441378		2.29167	0.196649	0.228394		2.29167	0.073408	0.620195		2.29167	0.484981	0.189774		2.29167	0.0683537	0.614316		2.29167	0.128688	0.617393		2.29167	0.369179	0.863783		2.29167	0.311296	0.763523		2.29167	0.598485	0.923825		2.29167
	2.40079	0.0810004	0.283706		2.40079	0.134684	0.342716		2.40079	0.756746	0.516768		2.40079	0.386547	0.477074		2.40079	0.174953	0.282202		2.40079	0.0621226	0.558788		2.40079	0.435989	0.17782		2.40079	0.157162	0.418607		2.40079	0.111438	0.577247		2.40079	0.3114	0.883746		2.40079	0.338568	0.77262		2.40079	0.506579	0.699636		2.40079
	2.50992	0.0660567	0.267575		2.50992	0.0889115	0.257666		2.50992	0.597511	0.491142		2.50992	0.409337	0.475629		2.50992	0.219273	0.321995		2.50992	0.053971	0.585987		2.50992	0.509945	0.184152		2.50992	0.114231	0.324671		2.50992	0.0999879	0.554309		2.50992	0.295973	0.987952		2.50992	0.342524	0.800316		2.50992	0.449733	0.450647		2.50992
	2.61905	0.0392109	0.25427		2.61905	0.0863135	0.241826		2.61905	0.472074	0.507295		2.61905	0.392344	0.453616		2.61905	0.277487	0.313486		2.61905	0.101718	0.552269		2.61905	0.550314	0.184751		2.61905	0.330283	0.375216		2.61905	0.0799449	0.482307		2.61905	0.353956	0.9802		2.61905	0.385235	0.826229		2.61905	0.430062	0.335566		2.61905
	2.72817	0.0903339	0.254025		2.72817	0.109176	0.230461		2.72817	0.418817	0.530223		2.72817	0.403838	0.419914		2.72817	0.173147	0.278029		2.72817	0.11487	0.583443		2.72817	0.598155	0.181116		2.72817	0.440896	0.418692		2.72817	0.0334998	0.496112		2.72817	0.42017	0.983655		2.72817	0.350225	0.791522		2.72817	0.387252	0.286852		2.72817
	2.8373	0.137126	0.246107		2.8373	0.0868947	0.21725		2.8373	0.441853	0.537573		2.8373	0.317367	0.402394		2.8373	0.125648	0.211402		2.8373	0.175892	0.519363		2.8373	0.539658	0.208523		2.8373	0.581716	0.418572		2.8373	0.0984994	0.496975		2.8373	0.398171	1		2.8373	0.316014	0.77777		2.8373	0.40868	0.280103		2.8373
	2.94643	0.176297	0.249154		2.94643	0.115699	0.197729		2.94643	0.369465	0.488769		2.94643	0.296575	0.33168		2.94643	0.150777	0.133521		2.94643	0.0834082	0.545983		2.94643	0.656715	0.215598		2.94643	0.65357	0.416375		2.94643	0.0533617	0.508961		2.94643	0.372733	0.970328		2.94643	0.28289	0.759389		2.94643	0.392095	0.273101		2.94643
	3.05556	0.199524	0.223494		3.05556	0.12142	0.203153		3.05556	0.400546	0.506207		3.05556	0.241787	0.293329		3.05556	0.151928	0.115196		3.05556	0.0787778	0.550136		3.05556	0.520768	0.228088		3.05556	0.83048	0.448464		3.05556	0.034729	0.574537		3.05556	0.346262	0.890032		3.05556	0.365307	0.770517		3.05556	0.433945	0.273163		3.05556
	3.16468	0.275263	0.237933		3.16468	0.228874	0.234345		3.16468	0.491659	0.448614		3.16468	0.165003	0.263595		3.16468	0.252485	0.102905		3.16468	0.0871846	0.514128		3.16468	0.461247	0.24201		3.16468	1	0.454813		3.16468	0.0816145	0.6839		3.16468	0.313446	0.796817		3.16468	0.380336	0.76144		3.16468	0.460346	0.282701		3.16468
	3.27381	0.330403	0.235241		3.27381	0.364061	0.289795		3.27381	0.3051	0.424784		3.27381	0.142349	0.264344		3.27381	0.267517	0.0966054		3.27381	0.224273	0.520218		3.27381	0.597964	0.256766		3.27381	0.982221	0.499325		3.27381	0.0987517	0.828826		3.27381	0.310916	0.773216		3.27381	0.413327	0.749334		3.27381	0.464112	0.292106		3.27381
	3.38294	0.303871	0.267849		3.38294	0.403396	0.316164		3.38294	0.328228	0.407624		3.38294	0.120154	0.260539		3.38294	0.242215	0.0940191		3.38294	0.196711	0.480018		3.38294	0.416051	0.230584		3.38294	0.905735	0.505123		3.38294	0.113008	0.859457		3.38294	0.37966	0.724094		3.38294	0.37943	0.766003		3.38294	0.51157	0.300776		3.38294
	3.49206	0.377842	0.326762		3.49206	0.447585	0.287814		3.49206	0.44514	0.380611		3.49206	0.111771	0.315346		3.49206	0.255569	0.0874758		3.49206	0.100072	0.506223		3.49206	0.343452	0.200389		3.49206	0.860387	0.466961		3.49206	0.169023	0.764126		3.49206	0.337819	0.637308		3.49206	0.435722	0.776012		3.49206	0.519127	0.296823		3.49206
	3.60119	0.427552	0.390206		3.60119	0.50345	0.231446		3.60119	0.474904	0.315931		3.60119	0.137407	0.35522		3.60119	0.272438	0.103743		3.60119	0.125346	0.483769		3.60119	0.425476	0.163639		3.60119	0.66241	0.461009		3.60119	0.198907	0.631752		3.60119	0.283384	0.645371		3.60119	0.475487	0.779292		3.60119	0.548993	0.285311		3.60119
	3.71032	0.437458	0.399481		3.71032	0.391156	0.169836		3.71032	0.452419	0.275501		3.71032	0.223268	0.327865		3.71032	0.392382	0.127435		3.71032	0.150372	0.500697		3.71032	0.356474	0.146576		3.71032	0.53608	0.409529		3.71032	0.205948	0.503976		3.71032	0.329551	0.604397		3.71032	0.503228	0.744216		3.71032	0.523403	0.291594		3.71032
	3.81944	0.386394	0.311736		3.81944	0.347904	0.139423		3.81944	0.521455	0.317022		3.81944	0.149969	0.276325		3.81944	0.336648	0.121306		3.81944	0.0448335	0.491637		3.81944	0.439808	0.125962		3.81944	0.442705	0.256989		3.81944	0.223412	0.43706		3.81944	0.300118	0.622315		3.81944	0.577581	0.692402		3.81944	0.521656	0.27776		3.81944
	3.92857	0.368096	0.219075		3.92857	0.233137	0.116676		3.92857	0.548753	0.281995		3.92857	0.2078	0.258115		3.92857	0.35629	0.152848		3.92857	0.0723604	0.49496		3.92857	0.444787	0.103353		3.92857	0.303905	0.2327		3.92857	0.305086	0.429109		3.92857	0.275149	0.576022		3.92857	0.588932	0.703654		3.92857	0.502048	0.268634		3.92857
	4.0377	0.283929	0.151307		4.0377	0.201097	0.123636		4.0377	0.466959	0.268641		4.0377	0.166635	0.271098		4.0377	0.414123	0.174264		4.0377	0	0.441105		4.0377	0.375253	0.104256		4.0377	0.213081	0.242264		4.0377	0.312444	0.391067		4.0377	0.268611	0.581177		4.0377	0.494746	0.66936		4.0377	0.436719	0.237886		4.0377
	4.14683	0.247725	0.143346		4.14683	0.127297	0.113449		4.14683	0.497409	0.223655		4.14683	0.229652	0.376673		4.14683	0.396604	0.181912		4.14683	0.125812	0.362294		4.14683	0.474134	0.079916		4.14683	0.183145	0.220723		4.14683	0.325787	0.383272		4.14683	0.253459	0.539099		4.14683	0.337469	0.663736		4.14683	0.331364	0.203007		4.14683
	4.25595	0.264615	0.115228		4.25595	0.225664	0.127272		4.25595	0.457774	0.232495		4.25595	0.356205	0.607718		4.25595	0.508575	0.184322		4.25595	0.0925016	0.392013		4.25595	0.441206	0.0860123		4.25595	0.212999	0.233598		4.25595	0.256489	0.446602		4.25595	0.26419	0.506028		4.25595	0.253559	0.595512		4.25595	0.295132	0.169107		4.25595
	4.36508	0.285487	0.123196		4.36508	0.273943	0.150634		4.36508	0.538564	0.239751		4.36508	0.394434	0.864926		4.36508	0.807707	0.172975		4.36508	0.118356	0.333695		4.36508	0.489824	0.127951		4.36508	0.245529	0.235889		4.36508	0.161904	0.56276		4.36508	0.195333	0.489387		4.36508	0.233549	0.558437		4.36508	0.272515	0.148305		4.36508
	4.47421	0.353555	0.125502		4.47421	0.411468	0.173076		4.47421	0.63745	0.293622		4.47421	0.471531	0.938261		4.47421	0.882892	0.147793		4.47421	0.170205	0.270372		4.47421	0.49146	0.1185		4.47421	0.261959	0.293349		4.47421	0.117374	0.713764		4.47421	0.174889	0.460769		4.47421	0.243055	0.490661		4.47421	0.337112	0.14691		4.47421
	4.58333	0.356422	0.138109		4.58333	0.62376	0.231661		4.58333	0.64843	0.278154		4.58333	0.651735	0.685585		4.58333	0.814027	0.135986		4.58333	0.154122	0.311909		4.58333	0.515138	0.138753		4.58333	0.252535	0.351458		4.58333	0.100116	0.868908		4.58333	0.156515	0.456327		4.58333	0.269298	0.480773		4.58333	0.347114	0.122511		4.58333
	4.69246	0.444641	0.170242		4.69246	0.851962	0.259406		4.69246	0.730466	0.226952		4.69246	0.75832	0.372081		4.69246	0.766941	0.135686		4.69246	0.237029	0.466385		4.69246	0.53545	0.128833		4.69246	0.255559	0.301635		4.69246	0.0398978	0.890089		4.69246	0.164678	0.452462		4.69246	0.279052	0.463405		4.69246	0.349891	0.121912		4.69246
	4.80159	0.576744	0.20315		4.80159	1	0.27417		4.80159	0.645338	0.281432		4.80159	0.665784	0.1862		4.80159	0.524255	0.0948169		4.80159	0.238288	0.617207		4.80159	0.660463	0.135252		4.80159	0.243531	0.275103		4.80159	0.0468358	0.772201		4.80159	0.301966	0.482993		4.80159	0.249517	0.459372		4.80159	0.343522	0.111683		4.80159
	4.91071	0.594914	0.22508		4.91071	0.869949	0.22228		4.91071	0.466402	0.347992		4.91071	0.482202	0.109356		4.91071	0.428926	0.079582		4.91071	0.33049	0.603221		4.91071	0.782069	0.129091		4.91071	0.16213	0.223215		4.91071	0.0917284	0.606037		4.91071	0.404942	0.477216		4.91071	0.187506	0.38794		4.91071	0.262566	0.10666		4.91071
	5.01984	0.506994	0.226529		5.01984	0.756995	0.149113		5.01984	0.407413	0.321606		5.01984	0.364778	0.0658831		5.01984	0.421454	0.0599736		5.01984	0.491162	0.456751		5.01984	0.867007	0.134046		5.01984	0.11759	0.13314		5.01984	0.146987	0.496946		5.01984	0.469255	0.465506		5.01984	0.12846	0.366544		5.01984	0.238718	0.0972235		5.01984
	5.12897	0.311835	0.180272		5.12897	0.513478	0.098726		5.12897	0.303861	0.234052		5.12897	0.327122	0.029704		5.12897	0.510679	0.0413653		5.12897	0.49904	0.231713		5.12897	0.777734	0.110793		5.12897	0.11409	0.0527669		5.12897	0.193166	0.444654		5.12897	0.422302	0.411022		5.12897	0.103525	0.377698		5.12897	0.190121	0.0880858		5.12897
	5.2381	0.217051	0.125911		5.2381	0.312602	0.0789323		5.2381	0.27622	0.114131		5.2381	0.389941	0.00962896		5.2381	0.599027	0.0388358		5.2381	0.649941	0.174797		5.2381	0.717268	0.142432		5.2381	0.0854318	0.061474		5.2381	0.180761	0.416057		5.2381	0.393793	0.335966		5.2381	0.0620965	0.412362		5.2381	0.145416	0.086794		5.2381
	5.34722	0.116468	0.0896603		5.34722	0.243343	0.0851156		5.34722	0.362656	0.0350327		5.34722	0.259681	0.0119643		5.34722	0.632429	0.0283344		5.34722	0.651077	0.0952876		5.34722	0.667148	0.151338		5.34722	0	0.00979001		5.34722	0.141147	0.413373		5.34722	0.167166	0.394887		5.34722	0	0.401384		5.34722	0.124178	0.0694483		5.34722
	5.45635	0.0375085	0.0787359		5.45635	0.200052	0.114386		5.45635	0.278738	0.0289471		5.45635	0.409841	0.00944599		5.45635	0.674295	0.0210241		5.45635	0.606886	0.0665533		5.45635	0.482861	0.160023		5.45635	0.092085	0.0212938		5.45635	0.133228	0.36155		5.45635	0.0749218	0.34201		5.45635	0.0684116	0.410705		5.45635	0.0521077	0.071518		5.45635
	5.56548	0.0571214	0.0602006		5.56548	0.130572	0.136283		5.56548	0.172545	0.00302944		5.56548	0.363154	0.0546689		5.56548	0.604616	0.0306745		5.56548	0.646314	0.0792975		5.56548	0.344977	0.202744		5.56548	0.0967229	0		5.56548	0.0881049	0.358769		5.56548	0.0758599	0.311392		5.56548	0.105181	0.426143		5.56548	0.045781	0.0822781		5.56548
	5.6746	0.0741458	0.0568029		5.6746	0.131288	0.131712		5.6746	0.00411437	0		5.6746	0.335039	0.149225		5.6746	0.626293	0.0281083		5.6746	0.533029	0.0719568		5.6746	0.338553	0.166608		5.6746	0.161234	0.0141028		5.6746	0.0460578	0.29761		5.6746	0.0800246	0.272474		5.6746	0.180673	0.411059		5.6746	0.0116434	0.050191		5.6746
	5.78373	0.0506352	0.0538997		5.78373	0.11929	0.156743		5.78373	0.132557	0.00876382		5.78373	0.332812	0.304599		5.78373	0.500048	0.0701743		5.78373	0.509842	0.0994192		5.78373	0.401925	0.142165		5.78373	0.228085	0.0351204		5.78373	0.0311694	0.28109		5.78373	0.0755757	0.309262		5.78373	0.199419	0.43997		5.78373	0	0.0352839		5.78373
	5.89286	0.101669	0.0619571		5.89286	0.0704821	0.211073		5.89286	0.0486851	0.0327344		5.89286	0.393175	0.373186		5.89286	0.408902	0.117683		5.89286	0.535793	0.0331694		5.89286	0.475278	0.139774		5.89286	0.349211	0.0591481		5.89286	0.00983325	0.318377		5.89286	0.054032	0.328156		5.89286	0.231101	0.357476		5.89286	0.072382	0.0433948		5.89286
	6.00198	0.134931	0.0741455		6.00198	0.0342304	0.226355		6.00198	0.210909	0.048886		6.00198	0.329914	0.28229		6.00198	0.271701	0.127051		6.00198	0.362832	0		6.00198	0.551632	0.149176		6.00198	0.457809	0.0799554		6.00198	0	0.303457		6.00198	0.0293234	0.334436		6.00198	0.159266	0.293208		6.00198	0.191829	0.0670087		6.00198
	6.11111	0.154454	0.0576144		6.11111	0.016148	0.169006		6.11111	0.22987	0.0432625		6.11111	0.291533	0.12927		6.11111	0.234401	0.0755907		6.11111	0.23621	0.0316215		6.11111	0.711035	0.194122		6.11111	0.484964	0.144088		6.11111	0.0881546	0.339704		6.11111	0.00955179	0.397899		6.11111	0.0840882	0.174896		6.11111	0.271323	0.0804233		6.11111
	6.22024	0.184486	0.0404082		6.22024	0	0.078433		6.22024	0.328071	0.0403419		6.22024	0.199883	0.0545432		6.22024	0.111233	0.0217911		6.22024	0.187239	0.0675402		6.22024	0.845608	0.26509		6.22024	0.523982	0.138265		6.22024	0.158831	0.324715		6.22024	0.0329669	0.435939		6.22024	0.103629	0.0989154		6.22024	0.371831	0.0837947		6.22024
	6.32937	0.184575	0.0288468		6.32937	0.0290907	0.0217397		6.32937	0.551736	0.0643454		6.32937	0.2222	0.00749757		6.32937	0.0327155	0		6.32937	0.223331	0.0998146		6.32937	0.978505	0.320038		6.32937	0.551626	0.123526		6.32937	0.135864	0.298945		6.32937	0.0761916	0.610864		6.32937	0.163093	0.0888374		6.32937	0.425391	0.0589839		6.32937
	6.43849	0.193282	0.0151898		6.43849	0.0450825	0.0127441		6.43849	0.756382	0.077981		6.43849	0.216236	0		6.43849	0	0.0098137		6.43849	0.118268	0.201928		6.43849	1	0.392054		6.43849	0.541025	0.116874		6.43849	0.129214	0.232036		6.43849	0	0.726981		6.43849	0.296514	0.0641417		6.43849	0.457849	0.0494011		6.43849
	6.54762	0.202989	0.00917489		6.54762	0.027989	0		6.54762	0.778339	0.15949		6.54762	0.496221	0.0278868		6.54762	0.0506788	0.0145472		6.54762	0.102475	0.251486		6.54762	0.962053	0.407378		6.54762	0.48784	0.0949904		6.54762	0.0970074	0.189019		6.54762	0.0591585	0.648062		6.54762	0.385283	0.0702983		6.54762	0.541099	0.0570767		6.54762
	6.65675	0.266895	0.00461353		6.65675	0.00855327	0.00652623		6.65675	0.94394	0.289886		6.65675	0.579244	0.0417283		6.65675	0.0638286	0.0524277		6.65675	0.134685	0.352336		6.65675	0.707406	0.294071		6.65675	0.395425	0.0873191		6.65675	0.117065	0.16177		6.65675	0.136265	0.366567		6.65675	0.479728	0.0168359		6.65675	0.450631	0.0434297		6.65675
	6.76587	0.299037	0		6.76587	0.0748498	0.0273841		6.76587	0.855678	0.514209		6.76587	0.716293	0.0880239		6.76587	0.243144	0.129837		6.76587	0.0718499	0.44946		6.76587	0.49979	0.133358		6.76587	0.382012	0.0708434		6.76587	0.138486	0.138316		6.76587	0.12821	0.286206		6.76587	0.484323	0		6.76587	0.366522	0.0320129		6.76587
	6.875	0.426646	0.00245573		6.875	0.157173	0.0321293		6.875	1	0.755572		6.875	0.843334	0.155491		6.875	0.331231	0.198863		6.875	0.0867445	0.530753		6.875	0.410445	0.0392067		6.875	0.362553	0.108406		6.875	0.10586	0.1551		6.875	0.23996	0.125745		6.875	0.430564	0.013188		6.875	0.320737	0.0322769		6.875
	6.98413	0.594291	0.0238351		6.98413	0.174349	0.0253077		6.98413	0.866832	0.93052		6.98413	0.980733	0.212928		6.98413	0.521801	0.279601		6.98413	0.0691561	0.463881		6.98413	0.255584	0.00462506		6.98413	0.253184	0.177165		6.98413	0.108365	0.204787		6.98413	0.329655	0.045291		6.98413	0.390877	0.0113611		6.98413	0.29387	0.0259007		6.98413
	7.09325	0.83107	0.0241119		7.09325	0.191533	0.0396739		7.09325	0.80619	0.879697		7.09325	1	0.271311		7.09325	0.73745	0.325139		7.09325	0.146534	0.394857		7.09325	0.0873042	0.00881971		7.09325	0.285118	0.256527		7.09325	0.136923	0.258322		7.09325	0.337018	0.0332837		7.09325	0.378277	0.0381369		7.09325	0.262938	0.015085
	7.20238	1	0.0296825		7.20238	0.3424	0.0548994		7.20238	0.779435	0.650304		7.20238	0.968324	0.274505		7.20238	0.920332	0.3456		7.20238	0.287531	0.329088		7.20238	0	0		7.20238	0.208473	0.217543		7.20238	0.108848	0.318857		7.20238	0.297911	0		7.20238	0.375544	0.0630196		7.20238	0.229368	0
	7.31151	0.96279	0.0337703		7.31151	0.471098	0.0896881		7.31151	0.794902	0.447602		7.31151	0.953572	0.299399		7.31151	1	0.360225		7.31151	0.340886	0.302926		7.31151	0.0609343	0.0102204		7.31151	0.0718777	0.24615		7.31151	0.124944	0.323203		7.31151	0.376675	0.0152145		7.31151	0.392415	0.0766478		7.31151	0.240317	0.0128211
	7.42063	0.827829	0.0376345		7.42063	0.520427	0.0817972		7.42063	0.785116	0.356359		7.42063	0.836973	0.329335		7.42063	0.971456	0.411535		7.42063	0.381618	0.247602		7.42063	0.0835881	0.0214502		7.42063	0.178554	0.373461		7.42063	0.0264588	0.232797		7.42063	0.460187	0.0431645		7.42063	0.387113	0.13234		7.42063	0.208484	0.00437407
	7.52976	0.775805	0.0557867		7.52976	0.601071	0.085747		7.52976	0.742861	0.312614		7.52976	0.624909	0.346704		7.52976	0.90474	0.552986		7.52976	0.401011	0.265953		7.52976	0.0491508	0.0300447		7.52976	0.138888	0.477046		7.52976	0.0324163	0.095031		7.52976	0.439212	0.0902237		7.52976	0.392482	0.171308		7.52976	0.318752	0.00554587
	7.63889	0.772246	0.0803982		7.63889	0.59807	0.104646		7.63889	0.712636	0.320636		7.63889	0.613812	0.429015		7.63889	0.84385	0.758181		7.63889	0.369725	0.225372		7.63889	0.0924972	0.0320293		7.63889	0.230655	0.468728		7.63889	0.0406829	0.0222374		7.63889	0.495902	0.171522		7.63889	0.428383	0.251115		7.63889	0.338437	0.0141085
	7.74802	0.72964	0.121918		7.74802	0.523927	0.119064						7.74802	0.602317	0.617837		7.74802	0.883369	0.963079		7.74802	0.268878	0.302		7.74802	0.195539	0.0648226		7.74802	0.174623	0.410277		7.74802	0.0517134	0		7.74802	0.573832	0.340239		7.74802	0.451151	0.33375		7.74802	0.367286	0.0587166
	7.85714	0.581797	0.142687		7.85714	0.443248	0.137793						7.85714	0.434134	0.889821						7.85714	0.392877	0.449521		7.85714	0.287409	0.095937		7.85714	0.160993	0.307251		7.85714	0.0221745	0.0624277		7.85714	0.706354	0.455608		7.85714	0.49509	0.380054		7.85714	0.474178	0.0802487
													7.96627	0.354207	0.991849						7.96627	0.621058	0.617615		7.96627	0.5181	0.181068		7.96627	0.225875	0.239816		7.96627	0.075014	0.128852		7.96627	0.802478	0.48375		7.96627	0.573444	0.453603
																					8.0754	0.747636	0.890224		8.0754	0.559557	0.265202		8.0754	0.243543	0.158467		8.0754	0.0761615	0.20998		8.0754	0.878513	0.440032		8.0754	0.657373	0.53959
																					8.18452	0.946135	1		8.18452	0.562518	0.346868		8.18452	0.311366	0.0798738		8.18452	0.0918528	0.207641		8.18452	0.902814	0.36744		8.18452	0.742567	0.744337
																					8.29365	1	0.890004		8.29365	0.568355	0.319865		8.29365	0.387357	0.091296		8.29365	0.130472	0.137311		8.29365	1	0.297022
																					8.40278	0.929365	0.688186		8.40278	0.582298	0.218426		8.40278	0.358622	0.0491227		8.40278	0.126358	0.147526		8.40278	0.847039	0.221742
																									8.5119	0.672977	0.147715		8.5119	0.405413	0.0401519		8.5119	0.162483	0.144946		8.5119	0.906941	0.182373
																													8.62103	0.454856	0.0350011		8.62103	0.212221	0.122433		8.62103	0.806808	0.190282
																													8.73016	0.351969	0.102972		8.73016	0.170888	0.0966426		8.73016	0.707652	0.146013
																													8.83929	0.336989	0.0985875		8.83929	0.173112	0.123918		8.83929	0.574571	0.129007
																																	8.94841	0.171854	0.121464
	MIN	278.965	400.582			278.965	400.582			278.965	400.582			278.965	400.582			278.965	400.582			278.965	400.582			278.965	400.582			278.965	400.582			278.965	400.582			278.965	400.582			278.965	400.582			278.965	400.582
	MAX	723.318	1686.56			723.318	1686.56			723.318	1686.56			723.318	1686.56			723.318	1686.56			723.318	1686.56			723.318	1686.56			723.318	1686.56			723.318	1686.56			723.318	1686.56			723.318	1686.56			723.318	1686.56
Rab7 and Rab11 normalised for overall min-max
	1min				10min				20min				30min				40min				50min				60min				71min				81min				91min				102min				112min				123min
		Rab7	Rab11			Rab7	Rab11			Rab7	Rab11			Rab7	Rab11			Rab7	Rab11			Rab7	Rab11			Rab7	Rab11			Rab7	Rab11			Rab7	Rab11			Rab7	Rab11			Rab7	Rab11			Rab7	Rab11
	0	0.222607	0.190935		0	0.261844	0.224384		0	0.229922	0.171031		0	0.266981	0.639707		0	0.411472	0.736467		0	0.513299	0.227658		0	0.667906	0.199425		0	0.612045	0.156417		0	0.434315	0.0889158		0	0.611982	0.10898		0	0.805326	0.228425		0	0.652686	0.108415		0
	0.10913	0.132352	0.213252		0.10913	0.205386	0.274874		0.10913	0.221788	0.176438		0.10913	0.224083	0.53088		0.10913	0.391824	0.713819		0.10913	0.467122	0.174275		0.10913	0.673516	0.175796		0.10913	0.691189	0.173396		0.10913	0.433135	0.0955831		0.10913	0.592567	0.129153		0.10913	0.873175	0.27035		0.10913	0.7324	0.125384		0.10913
	0.21825	0.0624076	0.239658		0.21825	0.18468	0.368185		0.21825	0.200437	0.187734		0.21825	0.215153	0.375038		0.21825	0.405014	0.562352		0.21825	0.474485	0.155964		0.21825	0.690339	0.173353		0.21825	0.725392	0.234931		0.21825	0.416111	0.11286		0.21825	0.607747	0.141509		0.21825	0.869649	0.283325		0.21825	0.826422	0.142645		0.21825
	0.32738	0.0304398	0.290106		0.32738	0.160586	0.489246		0.32738	0.171522	0.211153		0.32738	0.221655	0.250659		0.32738	0.441016	0.41963		0.32738	0.485724	0.130115		0.32738	0.685207	0.184056		0.32738	0.74543	0.290561		0.32738	0.391853	0.113357		0.32738	0.595133	0.167048		0.32738	0.921067	0.251325		0.32738	0.872619	0.166562		0.32738
	0.43651	0.0331538	0.380791		0.43651	0.151413	0.642807		0.43651	0.156275	0.259383		0.43651	0.202535	0.20175		0.43651	0.456995	0.353009		0.43651	0.492588	0.120863		0.43651	0.710156	0.200009		0.43651	0.766215	0.334588		0.43651	0.396277	0.126581		0.43651	0.621922	0.231476		0.43651	0.948703	0.188186		0.43651	0.921571	0.16241		0.43651
	0.54563	0.0248316	0.501348		0.54563	0.136281	0.783035		0.54563	0.149317	0.323218		0.54563	0.197368	0.180488		0.54563	0.414189	0.358786		0.54563	0.497199	0.108274		0.54563	0.695575	0.233406		0.54563	0.734472	0.363317		0.54563	0.4103	0.141179		0.54563	0.612236	0.295106		0.54563	0.949756	0.176954		0.54563	0.933553	0.15767		0.54563
	0.65476	0.0347742	0.552699		0.65476	0.132881	0.790242		0.65476	0.146353	0.347434		0.65476	0.214649	0.165015		0.65476	0.411184	0.340181		0.65476	0.510038	0.111161		0.65476	0.671147	0.295251		0.65476	0.730413	0.353997		0.65476	0.382576	0.159702		0.65476	0.584985	0.301761		0.65476	0.900471	0.16666		0.65476	0.950888	0.168856		0.65476
	0.76389	0.0179317	0.578571		0.76389	0.113997	0.641456		0.76389	0.141399	0.344481		0.76389	0.18675	0.159781		0.76389	0.388029	0.278753		0.76389	0.475007	0.100871		0.76389	0.644906	0.438334		0.76389	0.679836	0.301389		0.76389	0.412715	0.198778		0.76389	0.526948	0.282499		0.76389	0.789487	0.18223		0.76389	1	0.17797		0.76389
	0.87302	0	0.622968		0.87302	0.104419	0.42643		0.87302	0.136672	0.330408		0.87302	0.198318	0.16356		0.87302	0.375587	0.224322		0.87302	0.435793	0.0954929		0.87302	0.644355	0.647893		0.87302	0.637783	0.24387		0.87302	0.470453	0.215953		0.87302	0.510846	0.235764		0.87302	0.697473	0.210056		0.87302	0.96713	0.185759		0.87302
	0.98214	0.00310339	0.70151		0.98214	0.12022	0.277779		0.98214	0.115648	0.297569		0.98214	0.179555	0.158649		0.98214	0.307499	0.194659		0.98214	0.447426	0.105222		0.98214	0.572203	0.744569		0.98214	0.608093	0.235308		0.98214	0.534105	0.233394		0.98214	0.472892	0.208192		0.98214	0.638051	0.206834		0.98214	0.933204	0.19574		0.98214
	1.09127	0.0221311	0.812476		1.09127	0.115584	0.247286		1.09127	0.125652	0.305419		1.09127	0.18123	0.14771		1.09127	0.26772	0.182628		1.09127	0.389323	0.122881		1.09127	0.545875	0.631904		1.09127	0.61854	0.25278		1.09127	0.638947	0.249925		1.09127	0.465087	0.226447		1.09127	0.592646	0.233502		1.09127	0.894154	0.204625		1.09127
	1.2004	0.0228467	0.852483		1.2004	0.100699	0.274404		1.2004	0.104637	0.319046		1.2004	0.171634	0.160367		1.2004	0.237665	0.209057		1.2004	0.366117	0.134728		1.2004	0.543163	0.437858		1.2004	0.63579	0.280799		1.2004	0.758226	0.283274		1.2004	0.415649	0.235378		1.2004	0.50774	0.204576		1.2004	0.87227	0.190936		1.2004
	1.30952	0.0191672	0.746747		1.30952	0.10565	0.360981		1.30952	0.109512	0.33713		1.30952	0.17207	0.179357		1.30952	0.217631	0.214937		1.30952	0.32584	0.153278		1.30952	0.55448	0.351444		1.30952	0.590323	0.298989		1.30952	0.85789	0.313846		1.30952	0.440452	0.226686		1.30952	0.456304	0.189071		1.30952	0.804633	0.186333		1.30952
	1.41865	0.03542	0.575273		1.41865	0.1289	0.524973		1.41865	0.112767	0.336341		1.41865	0.184299	0.198195		1.41865	0.196513	0.243592		1.41865	0.316822	0.165018		1.41865	0.611464	0.323528		1.41865	0.591548	0.294182		1.41865	0.976755	0.362495		1.41865	0.422401	0.230707		1.41865	0.471427	0.177795		1.41865	0.767192	0.214124		1.41865
	1.52778	0.028151	0.466762		1.52778	0.144727	0.730853		1.52778	0.141069	0.316491		1.52778	0.192644	0.221269		1.52778	0.173016	0.227265		1.52778	0.331115	0.163833		1.52778	0.652808	0.327881		1.52778	0.55478	0.302581		1.52778	0.952216	0.388952		1.52778	0.447448	0.236218		1.52778	0.501637	0.197617		1.52778	0.795617	0.224168		1.52778
	1.6369	0.0349452	0.463806		1.6369	0.124743	0.928728		1.6369	0.138374	0.297669		1.6369	0.174942	0.249906		1.6369	0.136275	0.2093		1.6369	0.321454	0.17349		1.6369	0.659532	0.313622		1.6369	0.494521	0.298664		1.6369	0.881099	0.405528		1.6369	0.455593	0.240472		1.6369	0.52562	0.205659		1.6369	0.845587	0.243015		1.6369
	1.74603	0.037459	0.541103		1.74603	0.164788	1		1.74603	0.0985944	0.306832		1.74603	0.183847	0.271675		1.74603	0.156304	0.182406		1.74603	0.325939	0.188596		1.74603	0.641762	0.307583		1.74603	0.485891	0.322485		1.74603	0.711401	0.388942		1.74603	0.459115	0.240452		1.74603	0.507626	0.219116		1.74603	0.902413	0.29557		1.74603
	1.85516	0.0312949	0.60917		1.85516	0.139196	0.977182		1.85516	0.0973744	0.354088		1.85516	0.206534	0.288404		1.85516	0.157379	0.190116		1.85516	0.315285	0.197857		1.85516	0.641382	0.276495		1.85516	0.500996	0.346321		1.85516	0.594797	0.370537		1.85516	0.47794	0.256548		1.85516	0.532543	0.225168		1.85516	0.919848	0.365764		1.85516
	1.96429	0.015841	0.650963		1.96429	0.118035	0.977908		1.96429	0.128085	0.41844		1.96429	0.232698	0.311985		1.96429	0.153576	0.165971		1.96429	0.342113	0.202029		1.96429	0.569664	0.273734		1.96429	0.498194	0.368453		1.96429	0.519774	0.331347		1.96429	0.499216	0.263604		1.96429	0.505312	0.215255		1.96429	0.879553	0.476836		1.96429
	2.07341	0.0235849	0.584354		2.07341	0.108155	0.918236		2.07341	0.18136	0.428598		2.07341	0.231435	0.315066		2.07341	0.167155	0.186436		2.07341	0.30424	0.198746		2.07341	0.567225	0.256995		2.07341	0.488242	0.373756		2.07341	0.461809	0.314728		2.07341	0.50898	0.254645		2.07341	0.501441	0.215013		2.07341	0.829118	0.652152		2.07341
	2.18254	0.00230898	0.469374		2.18254	0.10527	0.741803		2.18254	0.222049	0.355584		2.18254	0.243885	0.314562		2.18254	0.175464	0.188633		2.18254	0.322228	0.192519		2.18254	0.59649	0.257519		2.18254	0.49422	0.334151		2.18254	0.482724	0.296019		2.18254	0.513063	0.260685		2.18254	0.526422	0.204376		2.18254	0.779367	0.76354		2.18254
	2.29167	0.0142207	0.368868		2.29167	0.126161	0.547211		2.29167	0.234755	0.278788		2.29167	0.264909	0.328696		2.29167	0.190353	0.229552		2.29167	0.298706	0.218636		2.29167	0.623754	0.243945		2.29167	0.496067	0.278207		2.29167	0.424786	0.270945		2.29167	0.532682	0.285624		2.29167	0.53056	0.219407		2.29167	0.742349	0.709249		2.29167
	2.40079	0.0366195	0.297235		2.40079	0.139819	0.408236		2.40079	0.262405	0.245641		2.40079	0.285685	0.348569		2.40079	0.182675	0.264901		2.40079	0.295821	0.203057		2.40079	0.609869	0.236559		2.40079	0.529982	0.229721		2.40079	0.413858	0.256824		2.40079	0.505238	0.290953		2.40079	0.54716	0.221866		2.40079	0.683373	0.549466		2.40079
	2.50992	0.0298636	0.28473		2.50992	0.11607	0.331664		2.50992	0.227679	0.235938		2.50992	0.292409	0.347765		2.50992	0.19836	0.291044		2.50992	0.293737	0.209957		2.50992	0.63083	0.240471		2.50992	0.513587	0.20645		2.50992	0.406605	0.248755		2.50992	0.49791	0.318771		2.50992	0.549568	0.229352		2.50992	0.646896	0.372007		2.50992
	2.61905	0.0177269	0.274416		2.61905	0.114722	0.317403		2.61905	0.200324	0.242054		2.61905	0.287395	0.335509		2.61905	0.218963	0.285454		2.61905	0.305944	0.201403		2.61905	0.642271	0.240841		2.61905	0.596094	0.218972		2.61905	0.393908	0.223428		2.61905	0.525452	0.316702		2.61905	0.575565	0.236356		2.61905	0.634273	0.289987		2.61905
	2.72817	0.0408392	0.274227		2.72817	0.126584	0.30717		2.72817	0.18871	0.250735		2.72817	0.290787	0.316746		2.72817	0.182035	0.26216		2.72817	0.309306	0.209312		2.72817	0.65583	0.238595		2.72817	0.638335	0.229742		2.72817	0.364485	0.228284		2.72817	0.556902	0.317624		2.72817	0.554255	0.226975		2.72817	0.606801	0.255268		2.72817
	2.8373	0.0619935	0.268089		2.8373	0.115023	0.295277		2.8373	0.193734	0.253518		2.8373	0.265273	0.306992		2.8373	0.165224	0.218389		2.8373	0.324906	0.193054		2.8373	0.639251	0.25553		2.8373	0.692112	0.229713		2.8373	0.405662	0.228588		2.8373	0.546453	0.321987		2.8373	0.533432	0.223258		2.8373	0.620552	0.250458		2.8373
	2.94643	0.0797024	0.270451		2.94643	0.129969	0.277702		2.94643	0.177947	0.23504		2.94643	0.259139	0.267622		2.94643	0.174118	0.167224		2.94643	0.301263	0.199808		2.94643	0.672427	0.259901		2.94643	0.719552	0.229168		2.94643	0.377067	0.232804		2.94643	0.53437	0.314066		2.94643	0.51327	0.21829		2.94643	0.609909	0.245467		2.94643
	3.05556	0.0902031	0.25056		3.05556	0.132937	0.282584		3.05556	0.184725	0.241642		3.05556	0.242973	0.24627		3.05556	0.174526	0.155185		3.05556	0.300079	0.200862		3.05556	0.633897	0.267618		3.05556	0.787111	0.237118		3.05556	0.365264	0.25587		3.05556	0.521797	0.292631		3.05556	0.563435	0.221297		3.05556	0.636764	0.245512		3.05556
	3.16468	0.124444	0.261753		3.16468	0.18869	0.310667		3.16468	0.204595	0.219837		3.16468	0.220318	0.229716		3.16468	0.210114	0.14711		3.16468	0.302228	0.191726		3.16468	0.617027	0.27622		3.16468	0.851848	0.238691		3.16468	0.394965	0.294339		3.16468	0.50621	0.267748		3.16468	0.572583	0.218844		3.16468	0.653705	0.25231		3.16468
	3.27381	0.149372	0.259666		3.27381	0.258833	0.36059		3.27381	0.16391	0.210814		3.27381	0.213634	0.230133		3.27381	0.215435	0.142972		3.27381	0.337275	0.193271		3.27381	0.655776	0.285338		3.27381	0.845058	0.249719		3.27381	0.405821	0.345317		3.27381	0.505008	0.261447		3.27381	0.592664	0.215572		3.27381	0.656122	0.259013		3.27381
	3.38294	0.137377	0.284943		3.38294	0.279242	0.384331		3.38294	0.168954	0.204317		3.38294	0.207085	0.228014		3.38294	0.20648	0.141273		3.38294	0.330228	0.183072		3.38294	0.604218	0.26916		3.38294	0.815849	0.251155		3.38294	0.414853	0.356092		3.38294	0.53766	0.248334		3.38294	0.572032	0.220077		3.38294	0.686576	0.265192		3.38294
	3.49206	0.170819	0.33061		3.49206	0.30217	0.358807		3.49206	0.19445	0.19409		3.49206	0.204612	0.258528		3.49206	0.211206	0.136974		3.49206	0.305523	0.189721		3.49206	0.583642	0.250504		3.49206	0.798532	0.2417		3.49206	0.450338	0.322559		3.49206	0.517787	0.225167		3.49206	0.606295	0.222783		3.49206	0.691426	0.262375		3.49206
	3.60119	0.193292	0.37979		3.60119	0.331156	0.308058		3.60119	0.200941	0.169601		3.60119	0.212176	0.280728		3.60119	0.217176	0.147661		3.60119	0.311984	0.184024		3.60119	0.606889	0.227797		3.60119	0.722927	0.240226		3.60119	0.469269	0.275996		3.60119	0.491931	0.227319		3.60119	0.630499	0.223669		3.60119	0.71059	0.25417		3.60119
	3.71032	0.197771	0.38698		3.71032	0.272891	0.252589		3.71032	0.196038	0.154294		3.71032	0.237509	0.265498		3.71032	0.259627	0.163226		3.71032	0.318382	0.188319		3.71032	0.587333	0.217254		3.71032	0.674684	0.227472		3.71032	0.473729	0.23105		3.71032	0.513859	0.216381		3.71032	0.647384	0.214188		3.71032	0.694169	0.258648		3.71032
	3.81944	0.174685	0.318962		3.81944	0.25045	0.225208		3.81944	0.211093	0.170014		3.81944	0.215882	0.236803		3.81944	0.239902	0.159199		3.81944	0.291401	0.18602		3.81944	0.610951	0.204516		3.81944	0.639026	0.189682		3.81944	0.484792	0.207513		3.81944	0.49988	0.221164		3.81944	0.692641	0.200184		3.81944	0.693048	0.248788		3.81944
	3.92857	0.166413	0.247134		3.92857	0.190902	0.204728		3.92857	0.217046	0.156753		3.92857	0.232945	0.226664		3.92857	0.246853	0.179921		3.92857	0.298438	0.186863		3.92857	0.612362	0.190547		3.92857	0.586021	0.183665		3.92857	0.536533	0.204715		3.92857	0.48802	0.208807		3.92857	0.69955	0.203225		3.92857	0.680466	0.242284		3.92857
	4.0377	0.128362	0.194603		4.0377	0.174278	0.210994		4.0377	0.199209	0.151697		4.0377	0.2208	0.233893		4.0377	0.267321	0.193991		4.0377	0.27994	0.173199		4.0377	0.592655	0.191105		4.0377	0.551336	0.186034		4.0377	0.541194	0.191334		4.0377	0.484914	0.210183		4.0377	0.642221	0.193956		4.0377	0.638544	0.22037		4.0377
	4.14683	0.111994	0.188432		4.14683	0.135986	0.201823		4.14683	0.205849	0.134665		4.14683	0.239393	0.292672		4.14683	0.261121	0.199015		4.14683	0.312103	0.153205		4.14683	0.62068	0.176066		4.14683	0.539904	0.180697		4.14683	0.549646	0.188592		4.14683	0.477717	0.19895		4.14683	0.546491	0.192435		4.14683	0.570938	0.195511		4.14683
	4.25595	0.11963	0.166636		4.25595	0.187025	0.214268		4.25595	0.197206	0.138011		4.25595	0.276733	0.421305		4.25595	0.30075	0.200598		4.25595	0.303587	0.160744		4.25595	0.611347	0.179833		4.25595	0.551305	0.183887		4.25595	0.505747	0.210869		4.25595	0.482814	0.190122		4.25595	0.495417	0.173995		4.25595	0.547688	0.171349		4.25595
	4.36508	0.129066	0.172812		4.36508	0.212075	0.235301		4.36508	0.214824	0.140759		4.36508	0.288012	0.564505		4.36508	0.406618	0.193144		4.36508	0.310197	0.145949		4.36508	0.625127	0.205746		4.36508	0.563727	0.184455		4.36508	0.445828	0.251728		4.36508	0.450108	0.185679		4.36508	0.483237	0.163974		4.36508	0.533175	0.156523		4.36508
	4.47421	0.159839	0.1746		4.47421	0.28343	0.255506		4.47421	0.236389	0.161155		4.47421	0.31076	0.605334		4.47421	0.433228	0.1766		4.47421	0.323452	0.129883		4.47421	0.62559	0.199906		4.47421	0.570002	0.19869		4.47421	0.417618	0.304844		4.47421	0.440398	0.17804		4.47421	0.489023	0.145655		4.47421	0.574626	0.15553		4.47421
	4.58333	0.161135	0.184372		4.58333	0.393579	0.308251		4.58333	0.238784	0.155299		4.58333	0.363929	0.464657		4.58333	0.408855	0.168843		4.58333	0.319341	0.140421		4.58333	0.632301	0.21242		4.58333	0.566403	0.213086		4.58333	0.406686	0.359416		4.58333	0.43167	0.176854		4.58333	0.504997	0.142982		4.58333	0.581045	0.13814		4.58333
	4.69246	0.201018	0.209281		4.69246	0.511983	0.333231		4.69246	0.256674	0.135913		4.69246	0.395377	0.290115		4.69246	0.39219	0.168646		4.69246	0.340536	0.179613		4.69246	0.638058	0.206291		4.69246	0.567558	0.200743		4.69246	0.368538	0.366867		4.69246	0.435548	0.175822		4.69246	0.510934	0.138288		4.69246	0.582827	0.137713		4.69246
	4.80159	0.260741	0.23479		4.80159	0.588793	0.346522		4.80159	0.238109	0.15654		4.80159	0.368074	0.186627		4.80159	0.306299	0.141797		4.80159	0.340857	0.217878		4.80159	0.673489	0.210257		4.80159	0.562965	0.194169		4.80159	0.372933	0.325399		4.80159	0.500757	0.183973		4.80159	0.492957	0.137197		4.80159	0.57874	0.130423		4.80159
	4.91071	0.268955	0.251789		4.91071	0.521315	0.299806		4.91071	0.199087	0.18174		4.91071	0.313908	0.143844		4.91071	0.27256	0.131788		4.91071	0.364429	0.21433		4.91071	0.707955	0.20645		4.91071	0.531879	0.181315		4.91071	0.401372	0.26695		4.91071	0.549669	0.182431		4.91071	0.455212	0.11789		4.91071	0.526791	0.126843		4.91071
	5.01984	0.229207	0.252913		5.01984	0.462709	0.233932		5.01984	0.186223	0.17175		5.01984	0.279262	0.11964		5.01984	0.269916	0.118906		5.01984	0.405504	0.177169		5.01984	0.732028	0.209512		5.01984	0.51487	0.158999		5.01984	0.436378	0.228577		5.01984	0.580217	0.179304		5.01984	0.419273	0.112107		5.01984	0.511487	0.120117		5.01984
	5.12897	0.140978	0.217055		5.12897	0.336359	0.188567		5.12897	0.16364	0.138601		5.12897	0.268152	0.0994977		5.12897	0.301495	0.106681		5.12897	0.407518	0.120075		5.12897	0.706726	0.195144		5.12897	0.513533	0.139088		5.12897	0.465632	0.210184		5.12897	0.557915	0.16476		5.12897	0.404095	0.115122		5.12897	0.480303	0.113604		5.12897
	5.2381	0.0981269	0.174917		5.2381	0.232133	0.170747		5.2381	0.157612	0.0931974		5.2381	0.286686	0.088321		5.2381	0.332762	0.10502		5.2381	0.446096	0.105635		5.2381	0.689589	0.214693		5.2381	0.502589	0.141245		5.2381	0.457773	0.200124		5.2381	0.544374	0.144724		5.2381	0.378879	0.124491		5.2381	0.451616	0.112684		5.2381
	5.34722	0.0526541	0.146816		5.34722	0.196198	0.176314		5.34722	0.176462	0.0632498		5.34722	0.248253	0.0896211		5.34722	0.344584	0.0981205		5.34722	0.446386	0.0854624		5.34722	0.675384	0.220196		5.34722	0.469964	0.128441		5.34722	0.432679	0.19918		5.34722	0.436729	0.160453		5.34722	0.341082	0.121524		5.34722	0.437987	0.100321		5.34722
	5.45635	0.0169572	0.138348		5.45635	0.173736	0.202666		5.45635	0.158161	0.0609457		5.45635	0.292558	0.0882191		5.45635	0.359401	0.0933179		5.45635	0.435089	0.0781723		5.45635	0.623153	0.225563		5.45635	0.50513	0.131291		5.45635	0.427662	0.180951		5.45635	0.392915	0.146337		5.45635	0.382723	0.124043		5.45635	0.39174	0.101796		5.45635
	5.56548	0.0258241	0.12398		5.56548	0.137686	0.222381		5.56548	0.135003	0.051133		5.56548	0.278783	0.113397		5.56548	0.334741	0.0996578		5.56548	0.445169	0.0814056		5.56548	0.584074	0.251959		5.56548	0.506901	0.126015		5.56548	0.399077	0.179973		5.56548	0.393361	0.138164		5.56548	0.405104	0.128216		5.56548	0.387681	0.109465		5.56548
	5.6746	0.0335206	0.121346		5.6746	0.138057	0.218265		5.6746	0.0982716	0.049986		5.6746	0.270488	0.166041		5.6746	0.342412	0.097972		5.6746	0.416207	0.0795432		5.6746	0.582253	0.229631		5.6746	0.531537	0.129509		5.6746	0.37244	0.15846		5.6746	0.395339	0.127775		5.6746	0.451054	0.124139		5.6746	0.365775	0.0865962		5.6746
	5.78373	0.0228917	0.119096		5.78373	0.131832	0.240801		5.78373	0.126282	0.0533041		5.78373	0.269831	0.252544		5.78373	0.297732	0.125608		5.78373	0.41028	0.0865107		5.78373	0.600214	0.214528		5.78373	0.557066	0.134716		5.78373	0.363009	0.152649		5.78373	0.393226	0.137595		5.78373	0.462463	0.131953		5.78373	0.358303	0.0759716		5.78373
	5.89286	0.0459635	0.125342		5.89286	0.106508	0.289715		5.89286	0.107992	0.0623797		5.89286	0.287641	0.29073		5.89286	0.265474	0.156819		5.89286	0.416914	0.0697025		5.89286	0.621004	0.213051		5.89286	0.603322	0.140669		5.89286	0.349492	0.165765		5.89286	0.382993	0.142639		5.89286	0.481748	0.109656		5.89286	0.40475	0.0817524		5.89286
	6.00198	0.0610011	0.13479		6.00198	0.0876983	0.303474		6.00198	0.143369	0.0684948		6.00198	0.268975	0.240124		6.00198	0.216915	0.162974		6.00198	0.372697	0.0612871		6.00198	0.642644	0.21886		6.00198	0.644794	0.145823		6.00198	0.343263	0.160517		6.00198	0.371257	0.144316		6.00198	0.438023	0.0922845		6.00198	0.481399	0.0985824		6.00198
	6.11111	0.0698274	0.121975		6.11111	0.0783161	0.251841		6.11111	0.147504	0.0663657		6.11111	0.257651	0.154931		6.11111	0.203714	0.129166		6.11111	0.340326	0.0693098		6.11111	0.687823	0.246631		6.11111	0.655164	0.161712		6.11111	0.399108	0.173267		6.11111	0.361865	0.161257		6.11111	0.392265	0.0603058		6.11111	0.53241	0.108143		6.11111
	6.22024	0.0834044	0.108638		6.22024	0.0699376	0.170297		6.22024	0.16892	0.06526		6.22024	0.230609	0.113327		6.22024	0.160123	0.0938218		6.22024	0.327807	0.0784227		6.22024	0.725963	0.290481		6.22024	0.670064	0.160269		6.22024	0.443881	0.167995		6.22024	0.372987	0.171412		6.22024	0.404158	0.0397689		6.22024	0.596906	0.110546		6.22024
	6.32937	0.0834449	0.0996757		6.32937	0.0850315	0.119255		6.32937	0.217697	0.074348		6.32937	0.237194	0.0871343		6.32937	0.132334	0.0795059		6.32937	0.337034	0.086611		6.32937	0.763629	0.324433		6.32937	0.680621	0.156618		6.32937	0.429332	0.15893		6.32937	0.393518	0.218108		6.32937	0.440353	0.0370449		6.32937	0.631275	0.092863		6.32937
	6.43849	0.087381	0.0890893		6.43849	0.093329	0.111156		6.43849	0.262326	0.0795106		6.43849	0.235434	0.0829601		6.43849	0.120755	0.0859531		6.43849	0.310175	0.112518		6.43849	0.769721	0.36893		6.43849	0.676572	0.15497		6.43849	0.425119	0.135395		6.43849	0.357329	0.249105		6.43849	0.521563	0.0303698		6.43849	0.652103	0.0860332		6.43849
	6.54762	0.0917694	0.0844267		6.54762	0.0844599	0.0996827		6.54762	0.267114	0.110371		6.54762	0.318044	0.098486		6.54762	0.138692	0.0890628		6.54762	0.306137	0.125091		6.54762	0.758966	0.378399		6.54762	0.656262	0.149548		6.54762	0.404717	0.120263		6.54762	0.385428	0.228038		6.54762	0.575594	0.0320339		6.54762	0.705525	0.0915038		6.54762
	6.65675	0.120661	0.0808908		6.65675	0.0743756	0.105558		6.65675	0.303228	0.15974		6.65675	0.342541	0.106192		6.65675	0.143345	0.113949		6.65675	0.314372	0.150678		6.65675	0.686794	0.308388		6.65675	0.62097	0.147648		6.65675	0.417423	0.110678		6.65675	0.422052	0.152893		6.65675	0.63308	0.0175835		6.65675	0.647472	0.0817773		6.65675
	6.76587	0.135192	0.0773146		6.76587	0.108774	0.124337		6.76587	0.28398	0.244672		6.76587	0.382977	0.131967		6.76587	0.206809	0.164803		6.76587	0.298308	0.175319		6.76587	0.627951	0.209086		6.76587	0.615848	0.143566		6.76587	0.430993	0.102428		6.76587	0.418226	0.131441		6.76587	0.635877	0.0130329		6.76587	0.593499	0.0736403		6.76587
	6.875	0.192883	0.0792182		6.875	0.151488	0.128609		6.875	0.315454	0.336055		6.875	0.420461	0.169529		6.875	0.237984	0.210151		6.875	0.302116	0.195944		6.875	0.602629	0.150912		6.875	0.608417	0.152872		6.875	0.410325	0.108332		6.875	0.471305	0.0886056		6.875	0.603156	0.0165975		6.875	0.564119	0.0738285		6.875
	6.98413	0.268674	0.0957908		6.98413	0.1604	0.122468		6.98413	0.286413	0.402292		6.98413	0.461001	0.201507		6.98413	0.305431	0.263193		6.98413	0.297619	0.178978		6.98413	0.558738	0.129545		6.98413	0.566651	0.169906		6.98413	0.411911	0.12581		6.98413	0.513909	0.0671286		6.98413	0.578999	0.0161037		6.98413	0.546878	0.0692841		6.98413
	7.09325	0.375719	0.0960054		7.09325	0.169316	0.135402		7.09325	0.273188	0.38305		7.09325	0.466685	0.234011		7.09325	0.381753	0.29311		7.09325	0.317401	0.161466		7.09325	0.511044	0.132137		7.09325	0.578846	0.189567		7.09325	0.430003	0.144641		7.09325	0.517406	0.0639232		7.09325	0.57133	0.023341		7.09325	0.527029	0.0615756
	7.20238	0.452091	0.100323		7.20238	0.247594	0.14911		7.20238	0.267353	0.296199		7.20238	0.457339	0.23579		7.20238	0.446478	0.306551		7.20238	0.353446	0.14478		7.20238	0.4863	0.126687		7.20238	0.549577	0.179909		7.20238	0.412217	0.165934		7.20238	0.498831	0.0550382		7.20238	0.569666	0.0300666		7.20238	0.505488	0.0508243
	7.31151	0.435269	0.103492		7.31151	0.314369	0.18043		7.31151	0.270726	0.219454		7.31151	0.452987	0.249649		7.31151	0.474674	0.31616		7.31151	0.367087	0.138142		7.31151	0.50357	0.133002		7.31151	0.497413	0.186997		7.31151	0.422414	0.167463		7.31151	0.536243	0.0590997		7.31151	0.579935	0.0337501		7.31151	0.512514	0.0599621
	7.42063	0.374254	0.106488		7.42063	0.339964	0.173326		7.42063	0.268592	0.184908		7.42063	0.418584	0.266316		7.42063	0.464572	0.349869		7.42063	0.377499	0.124106		7.42063	0.509991	0.139941		7.42063	0.538151	0.218537		7.42063	0.360025	0.135662		7.42063	0.575909	0.0665609		7.42063	0.576708	0.0488032		7.42063	0.492086	0.0539417
	7.52976	0.350735	0.120559		7.52976	0.381807	0.176882		7.52976	0.259377	0.168346		7.52976	0.356014	0.275986		7.52976	0.44096	0.442796		7.52976	0.382457	0.128762		7.52976	0.500231	0.145251		7.52976	0.523003	0.244199		7.52976	0.363799	0.0872028		7.52976	0.565946	0.0791233		7.52976	0.579976	0.0593361		7.52976	0.562845	0.0547769
	7.63889	0.349126	0.139637		7.63889	0.380249	0.193897		7.63889	0.252786	0.171383		7.63889	0.35274	0.321813		7.63889	0.41941	0.577602		7.63889	0.374459	0.118466		7.63889	0.512516	0.146477		7.63889	0.558047	0.242138		7.63889	0.369035	0.0615974		7.63889	0.592873	0.100826		7.63889	0.601828	0.0809072		7.63889	0.575477	0.0608796
	7.74802	0.329864	0.171821		7.74802	0.34178	0.206878						7.74802	0.349348	0.426939		7.74802	0.433396	0.712212		7.74802	0.348678	0.137907		7.74802	0.54172	0.16674		7.74802	0.53665	0.227658		7.74802	0.376023	0.0537753		7.74802	0.629889	0.145865		7.74802	0.615686	0.103243		7.74802	0.593989	0.0926725
	7.85714	0.263025	0.187921		7.85714	0.299919	0.22374						7.85714	0.299726	0.578365						7.85714	0.380378	0.175335		7.85714	0.567758	0.185965		7.85714	0.531445	0.202134		7.85714	0.357311	0.0757345		7.85714	0.692834	0.176662		7.85714	0.642431	0.115758		7.85714	0.662581	0.108019
													7.96627	0.276143	0.635169						7.96627	0.438712	0.217982		7.96627	0.633141	0.238566		7.96627	0.556222	0.185427		7.96627	0.390784	0.0990995		7.96627	0.738492	0.184175		7.96627	0.690122	0.135638
																					8.0754	0.471071	0.287145		8.0754	0.64489	0.29055		8.0754	0.562969	0.165274		8.0754	0.391511	0.127637		8.0754	0.774607	0.172504		8.0754	0.741208	0.15888
																					8.18452	0.521817	0.314996		8.18452	0.64573	0.341011		8.18452	0.58887	0.145803		8.18452	0.401451	0.126814		8.18452	0.78615	0.153126		8.18452	0.793063	0.214221
																					8.29365	0.535588	0.287089		8.29365	0.647384	0.324326		8.29365	0.617889	0.148633		8.29365	0.425916	0.102075		8.29365	0.832311	0.134328
																					8.40278	0.51753	0.235886		8.40278	0.651336	0.261649		8.40278	0.606916	0.138185		8.40278	0.42331	0.105668		8.40278	0.759657	0.114232
																									8.5119	0.677036	0.217958		8.5119	0.624785	0.135962		8.5119	0.446195	0.104761		8.5119	0.78811	0.103722
																													8.62103	0.643666	0.134686		8.62103	0.477704	0.0968413		8.62103	0.740549	0.105834
																													8.73016	0.604375	0.151526		8.73016	0.451519	0.0877696		8.73016	0.693451	0.0940162
																													8.83929	0.598655	0.150439		8.83929	0.452928	0.0973639		8.83929	0.63024	0.0894765
																																	8.94841	0.452132	0.0965007
[truncated: 2 more columns]
