# Supplementary material for: A novel live-cell imaging assay reveals regulation of endosome maturation
Source: eLife. 2021 Nov 30;10:e70982. doi: 10.7554/eLife.70982 (PMC8635980; doi:10.7554/eLife.70982)
Supplement: Figure 9—source data 1. [file elife-70982-fig9-data1.xlsx]

## Sheet: exp1 endosome1
endosome #1									background-adjusted				normalised
		frame #	Rab5(rim)	Rab5(background)	TfR(rim)	TfR(background)			frame #	Rab5	TfR		frame #	Rab5	TfR
		2	497.85	492.52	396.1	382.836			2	5.33	13.264		2	0.272312	0.291574
		3	474.59	478.217	380.61	368.539			3	-3.627	12.071		3	0.164196	0.256621
		4	475.875	468.519	368.298	354.904			4	7.356	13.394		4	0.296767	0.295383
		5	533.654	481.763	396.654	375.372			5	51.891	21.282		5	0.834331	0.526485
		6	522.154	456.538	378.885	352.513			6	65.616	26.372		6	1	0.675612
		7	475.048	439.532	378.548	344.276			7	35.516	34.272		7	0.636675	0.907067
		8	487.44	454	390.74	353.296			8	33.44	37.444		8	0.611617	1
		9	474.06	463.914	378.41	361.533			9	10.146	16.877		9	0.330444	0.397428
		10	473.292	454.711	386.792	365.329			10	18.581	21.463		10	0.43226	0.531788
		11	442.677	442.947	377.698	358.638			11	-0.27	19.06		11	0.204717	0.461385
		12	444.562	451.763	360.198	353.5			12	-7.201	6.698		12	0.121056	0.0992031
		13	416	426.954	369.708	358.947			13	-10.954	10.761		13	0.075755	0.218241
		14	416.458	428.993	345.615	342.303			14	-12.535	3.312		14	0.0566714	0
		15	412.698	429.928	348.948	345.401			15	-17.23	3.547		15	0	0.00688503
		16	416.946	431.885	357.587	351.777			16	-14.939	5.81		16	0.0276537	0.0731865
		17	428.565	439.216	362.054	343.804			17	-10.651	18.25		17	0.0794124	0.437654
		18	449.57	443.178	372.32	351.724			18	6.392	20.596		18	0.285131	0.506387
		19	445.85	454.914	361.88	350.296			19	-9.064	11.584		19	0.0985684	0.242353
		20	437.74	449.836	362.71	356.039			20	-12.096	6.671		20	0.0619704	0.098412

## Sheet: exp1 endosome2
endosome #2									background-adjusted				normalised
		frame #	Rab5(rim)	Rab5(background)	TfR(rim)	TfR(background)			frame #	Rab5	TfR		frame #	Rab5	TfR
		9	355.993	368.191	299.336	296.892			9	-12.198	2.444		9	0.0511073	0
		10	344.112	362.441	291.461	287.176			10	-18.329	4.285		10	0.00670616	0.126278
		11	356.237	361.665	300.269	293.792			11	-5.428	6.477		11	0.100136	0.276631
		12	363.372	365.186	301.037	289.241			12	-1.814	11.796		12	0.126309	0.641471
		13	351.346	364.123	297.526	289.245			13	-12.777	8.281		13	0.0469142	0.40037
		14	343.73	362.985	290.276	283.779			14	-19.255	6.497		14	0	0.278003
		15	356.605	368.691	307.092	301.054			15	-12.086	6.038		15	0.0519184	0.246519
		16	374.487	364.75	306.849	297.559			16	9.737	9.29		16	0.209962	0.46958
		17	367.697	372.451	302.895	295.926			17	-4.754	6.969		17	0.105017	0.310378
		18	355.967	371.348	300.816	292.368			18	-15.381	8.448		18	0.0280558	0.411825
		19	360.132	364.784	306.204	292.833			19	-4.652	13.371		19	0.105756	0.749503
		20	360.921	375.824	309.395	302.681			20	-14.903	6.714		20	0.0315175	0.292887
		21	366.25	372.824	310.382	299.799			21	-6.574	10.583		21	0.0918367	0.558269
		22	525.592	406.765	301.855	290.681			22	118.827	11.174		22	1	0.598807
		23	511.507	407.775	305.684	292.201			23	103.732	13.483		23	0.890681	0.757185
		24	407.932	384.235	313.162	298.805			24	23.697	14.357		24	0.311062	0.817134
		25	438.833	397.47	316.583	299.56			25	41.363	17.023		25	0.439	1
		26	433.688	385.57	313.479	300.775			26	48.118	12.704		26	0.48792	0.703752
		27	402.639	380.33	309.083	301.02			27	22.309	8.063		27	0.30101	0.385417
		28	394.222	375.14	315.604	298.955			28	19.082	16.649		28	0.277639	0.974347
		29	361.618	364.12	309.681	298.07			29	-2.502	11.611		29	0.121326	0.628781
		30	359.583	365.533	308.765	292.408			30	-5.95	16.357		30	0.0963558	0.954318
		31	352.561	367.783	312.758	305.766			31	-15.222	6.992		31	0.0292073	0.311956
		32	339.235	353.755	286.97	281.842			32	-14.52	5.128		32	0.0342912	0.1841
		33	356.25	375.473	298.008	290.625			33	-19.223	7.383		33	0.000231746	0.338775
		34	357.228	366.594	316.86	302.146			34	-9.366	14.714		34	0.0716169	0.841622

## Sheet: exp1 endosome3
endosome #3									background-adjusted				normalised
		frame #	Rab5(rim)	Rab5(background)	TfR(rim)	TfR(background)			frame #	Rab5	TfR		frame #	Rab5	TfR
		6	382.693	395.284	323.926	322.565			6	-12.591	1.361		6	0.242212	0.242999
		7	397.174	407.406	318.802	320.384			7	-10.232	-1.582		7	0.275906	0.155132
		8	385.89	407.085	323.186	326.179			8	-21.195	-2.993		8	0.119321	0.113005
		9	398.605	416.308	333.384	333.964			9	-17.703	-0.58		9	0.169197	0.185048
		10	386.424	415.973	332.517	338.321			10	-29.549	-5.804		10	0	0.0290798
		11	379.651	409.103	341.267	336.844			11	-29.452	4.423		11	0.00138546	0.334418
		12	390.099	411.862	328.221	332.058			12	-21.763	-3.837		12	0.111208	0.0878068
		13	393.169	402.848	320.651	327.429			13	-9.679	-6.778		13	0.283804	0
		14	423.049	407.308	342.957	322.929			14	15.741	20.028		14	0.64688	0.800322
		15	418.676	409.858	346.994	336.616			15	8.818	10.378		15	0.547998	0.512211
		16	398.648	418.759	339.636	328.599			16	-20.111	11.037		16	0.134804	0.531886
		17	431.727	418	347.114	333.832			17	13.727	13.282		17	0.618114	0.598913
		18	465.614	425.15	348.13	326.229			18	40.464	21.901		18	1	0.856243
		19	434.848	416.121	359.37	332.654			19	18.727	26.716		19	0.689529	1
		20	454.201	418.617	368.832	343.067			20	35.584	25.765		20	0.930299	0.971607
		21	437.158	418.246	360.038	340.467			21	18.912	19.571		21	0.692171	0.786678
		22	400.223	424.146	341.462	324.779			22	-23.923	16.683		22	0.0803565	0.700454
		23	405.62	428.167	332.158	318.725			23	-22.547	13.433		23	0.10001	0.603422
		24	416.125	420.667	341.5	323.471			24	-4.542	18.029		24	0.357177	0.74064
		25	397.676	416.22	340.562	321.108			25	-18.544	19.454		25	0.157185	0.783185
		26	385.733	406.22	327.534	317.522			26	-20.487	10.012		26	0.129433	0.501284
		27	394.682	413.78	333.386	318.914			27	-19.098	14.472		27	0.149272	0.634442
		28	390.239	410.72	332.557	318.547			28	-20.481	14.01		28	0.129519	0.620648
		29	391.983	408.927	330.023	317.638			29	-16.944	12.385		29	0.180038	0.572132
		30	391.926	412.103	332.551	320.522			30	-20.177	12.029		30	0.133861	0.561504
		31	382.284	401.056	341.659	334.121			31	-18.772	7.538		31	0.153929	0.42742

## Sheet: exp1 endosome4
endosome #4									background-adjusted				normalised
		frame #	Rab5(rim)	Rab5(background)	TfR(rim)	TfR(background)			frame #	Rab5	TfR		frame #	Rab5	TfR
		2	410.073	434.756	383.153	402.841			2	-24.683	-19.688		2	0.0358254	0.112966
		3	399.685	427.205	382.411	394			3	-27.52	-11.589		3	0.00629703	0.232861
		4	408.823	422.92	395.185	404.79			4	-14.097	-9.605		4	0.146008	0.262231
		5	424.113	437.176	423.621	416.256			5	-13.063	7.365		5	0.15677	0.513449
		6	387.871	411.966	383.927	388.71			6	-24.095	-4.783		6	0.0419455	0.333615
		7	398.871	404.21	397.089	384.977			7	-5.339	12.112		7	0.237164	0.583722
		8	396.565	417.949	394.669	388.739			8	-21.384	5.93		8	0.0701625	0.492206
		9	416.358	431.739	393.175	398.131			9	-15.381	-4.956		9	0.132644	0.331054
		10	421.414	424.302	377.655	386.552			10	-2.888	-8.897		10	0.262675	0.272712
		11	459.097	410.773	387.185	364.193			11	48.324	22.992		11	0.795706	0.744785
		12	486.125	419.428	411.438	371.206			12	66.697	40.232		12	0.986938	1
		13	485.583	417.631	395.8	373.818			13	67.952	21.982		13	1	0.729834
		14	457.558	412.358	371.492	369.852			14	45.2	1.64		14	0.76319	0.428698
		15	435.65	413.693	372.408	372.097			15	21.957	0.311		15	0.521269	0.409024
		16	404.317	420.812	367.133	374.074			16	-16.495	-6.941		16	0.121049	0.301668
		17	392.983	399.631	352.925	369.54			17	-6.648	-16.615		17	0.223539	0.158458
		18	390.4	403.528	342.808	369.892			18	-13.128	-27.084		18	0.156094	0.00347885
		19	397.05	402.097	362.842	375.386			19	-5.047	-12.544		19	0.240203	0.218724
		20	381.357	409.482	348.83	376.149			20	-28.125	-27.319		20	0	0
		21	378.08	399.613	333.661	356.048			21	-21.533	-22.387		21	0.0686116	0.0730115

## Sheet: exp1 endosome5
endosome #5									background-adjusted				normalised
		frame #	Rab5(rim)	Rab5(background)	TfR(rim)	TfR(background)			frame #	Rab5	TfR		frame #	Rab5	TfR
		30	308.698	312.18	282.922	271.064			30	-3.482	11.858		30	0.0887823	0.485795
		31	282.545	300.702	301.304	291.857			31	-18.157	9.447		31	0	0.401441
		32	282.348	299.679	292.009	274.208			32	-17.331	17.801		32	0.00499722	0.693723
		33	284.352	290.878	280.407	266.628			33	-6.526	13.779		33	0.0703664	0.553005
		34	485.379	338.244	300.742	277.523			34	147.135	23.219		34	1	0.883283
		35	362.315	304.176	297.339	270.784			35	58.139	26.555		35	0.461583	1
		36	330.839	292.653	294.371	273.676			36	38.186	20.695		36	0.340869	0.794976
		37	312.968	291.812	289.839	276.222			37	21.156	13.617		37	0.23784	0.547337
		38	331.782	304.006	287.726	279.761			38	27.776	7.965		38	0.27789	0.349591
		39	320.188	303.286	281.312	283.339			39	16.902	-2.027		39	0.212103	0
		40	289.648	284.817	264.917	256.055			40	4.831	8.862		40	0.139075	0.380974
		41	298.045	286.905	275.402	267.78			41	11.14	7.622		41	0.177244	0.33759
		42	299.948	296.291	271.603	265.645			42	3.657	5.958		42	0.131973	0.279372
		43	285.328	283.471	265.138	259.262			43	1.857	5.876		43	0.121083	0.276503

## Sheet: exp1 endosome6
endosome #6									background-adjusted				normalised
		frame #	Rab5(rim)	Rab5(background)	TfR(rim)	TfR(background)			frame #	Rab5	TfR		frame #	Rab5	TfR
		7	377.211	397.033	397.336	394.267			7	-19.822	3.069		7	0.0515654	0.159275
		8	377.159	388.315	389.621	389.603			8	-11.156	0.018		8	0.12973	0.0887965
		9	376.023	389.391	396.485	387.549			9	-13.368	8.936		9	0.109778	0.294802
		10	361.227	386.766	383.288	387.114			10	-25.539	-3.826		10	0	0
		11	376.576	388.527	381.212	384.815			11	-11.951	-3.603		11	0.122559	0.00515131
		12	424.079	387.709	397.729	375.388			12	36.37	22.341		12	0.558398	0.604458
		13	409.824	380.573	422.662	383.198			13	29.251	39.464		13	0.494187	1
		14	380.838	384.651	401.699	380.432			14	-3.813	21.267		14	0.195961	0.579649
		15	409.596	380.917	417.831	390.917			15	28.679	26.914		15	0.489028	0.710095
		16	413.257	384.021	406.941	381.151			16	29.236	25.79		16	0.494052	0.68413
		17	367.897	380.484	412.478	387.427			17	-12.587	25.051		17	0.116823	0.667059
		18	397.064	396.546	406.936	384.357			18	0.518	22.579		18	0.235025	0.609956
		19	476.535	405.805	419.319	387.885			19	70.73	31.434		19	0.868313	0.814507
		20	433.375	397.106	408.829	385.034			20	36.269	23.795		20	0.557487	0.638046
		21	450.081	384.894	402.669	375.458			21	65.187	27.211		21	0.818317	0.716955
		22	448.844	388.398	405.556	374.981			22	60.446	30.575		22	0.775555	0.794664
		23	470.544	395.917	405.6	375.171			23	74.627	30.429		23	0.903463	0.791291
		24	500.575	415.245	392.375	363.454			24	85.33	28.921		24	1	0.756456
		25	498.058	414.896	389.974	362.495			25	83.162	27.479		25	0.980445	0.723146
		26	440.987	399.146	369.321	352.042			26	41.841	17.279		26	0.607744	0.487526
		27	394.91	390.778	358.968	347.514			27	4.132	11.454		27	0.267622	0.352968
		28	391.468	396.618	352.019	343.184			28	-5.15	8.835		28	0.183902	0.292469
		29	388.712	394.722	351.808	351.377			29	-6.01	0.431		29	0.176145	0.0983368

## Sheet: exp1 endosome7
endosome #7									background-adjusted				normalised
		frame #	Rab5(rim)	Rab5(background)	TfR(rim)	TfR(background)			frame #	Rab5	TfR		frame #	Rab5	TfR
		17	426.324	408.72	474.454	423.268			17	17.604	51.186		17	0.403435	1
		18	448.837	417.147	470.221	434.487			18	31.69	35.734		18	0.550216	0.560523
		19	365.26	386.372	420.769	396.147			19	-21.112	24.622		19	0	0.244482
		20	446.296	417.939	439.343	403.896			20	28.357	35.447		20	0.515485	0.552361
		21	432.778	426.091	467.954	429.189			21	6.687	38.765		21	0.289676	0.646729
		22	450.475	405.898	456.183	410.744			22	44.577	45.439		22	0.684503	0.836547
		23	464.482	433.083	472.616	422.833			23	31.399	49.783		23	0.547183	0.960097
		24	438.607	444.351	443.527	420.435			24	-5.744	23.092		24	0.16014	0.200967
		25	496.519	421.665	446.269	415.396			25	74.854	30.873		25	1	0.42227
		26	462.731	433.41	443.413	417.032			26	29.321	26.381		26	0.52553	0.294511
		27	447.356	429.404	424.25	408.224			27	17.952	16.026		27	0.407061	0
		28	457.643	426.912	430.274	400.221			28	30.731	30.053		28	0.540223	0.398948

## Sheet: exp1 endosome8
endosome #8									background-adjusted				normalised
		frame #	Rab5(rim)	Rab5(background)	TfR(rim)	TfR(background)			frame #	Rab5	TfR		frame #	Rab5	TfR
		7	298.25	318.575	306.903	307.795			7	-20.325	-0.892		7	0.122333	0.186426
		8	299.431	313.695	314.451	308.39			8	-14.264	6.061		8	0.192348	0.301268
		9	315.806	321.995	325.715	322.83			9	-6.189	2.885		9	0.285628	0.248811
		10	304.785	314.65	332.951	327.315			10	-9.865	5.636		10	0.243164	0.294249
		11	300.812	316.64	314.035	314.875			11	-15.828	-0.84		11	0.174281	0.187285
		12	302.882	332.24	309.174	317.995			12	-29.358	-8.821		12	0.0179861	0.0554638
		13	298.528	312.47	307.181	309.075			13	-13.942	-1.894		13	0.196068	0.169876
		14	282.907	296.913	301.514	304.434			14	-14.006	-2.92		14	0.195328	0.15293
		15	306.456	315.719	312.14	306.156			15	-9.263	5.984		15	0.250118	0.299997
		16	384.812	329.16	324.25	299.59			16	55.652	24.66		16	1	0.608467
		17	323.453	306.79	334.642	302.295			17	16.663	32.347		17	0.549609	0.735432
		18	319.615	314.285	356.068	308.5			18	5.33	47.568		18	0.418693	0.986836
		19	321.118	308.255	351.799	307.275			19	12.863	44.524		19	0.505712	0.936559
		20	345.736	316.565	352.778	309.625			20	29.171	43.153		20	0.694098	0.913914
		21	346.188	318.455	358.09	309.725			21	27.733	48.365		21	0.677487	1
		22	332.583	310.605	331.667	307.09			22	21.978	24.577		22	0.611007	0.607096
		23	337.611	322.61	328.278	312.055			23	15.001	16.223		23	0.53041	0.469113
		24	321.159	332.585	308.424	302.968			24	-11.426	5.456		24	0.225132	0.291276
		25	308.515	326.104	302.434	303.568			25	-17.589	-1.134		25	0.153939	0.182429
		26	306.947	318.446	286.303	292.337			26	-11.499	-6.034		26	0.224289	0.101496
		27	302.833	317.076	301.061	302.81			27	-14.243	-1.749		27	0.192591	0.172271
		28	284.864	307.668	279.258	288.538			28	-22.804	-9.28		28	0.0936962	0.0478825
		29	299.826	321.402	280.636	292.815			29	-21.576	-12.179		29	0.107882	0
		30	290.417	321.332	281.045	286.957			30	-30.915	-5.912		30	0	0.103511
		31	297.81	318.645	293.302	291.57			31	-20.835	1.732		31	0.116442	0.229767

## Sheet: exp1 endosome9
endosome #9									background-adjusted				normalised
		frame #	Rab5(rim)	Rab5(background)	TfR(rim)	TfR(background)			frame #	Rab5	TfR		frame #	Rab5	TfR
		11	461.068	493.174	1373.84	1257.21			11	-32.106	116.634		11	0	0.510056
		12	448.28	469.728	1320.49	1251.88			12	-21.448	68.617		12	0.0763035	0.378434
		13	454.598	475.212	1334.88	1203.04			13	-20.614	131.841		13	0.0822744	0.55174
		14	607.471	499.898	1368.1	1242.4			14	107.573	125.697		14	1	0.534899
		15	548.321	496.25	1538.99	1353.4			15	52.071	185.583		15	0.602646	0.699055
		16	517.154	490.38	1583.65	1288.28			16	26.774	295.371		16	0.421538	1
		17	483.949	474.854	1391.65	1297.04			17	9.095	94.612		17	0.294969	0.44969
		18	480.64	472.104	1350.45	1292.17			18	8.536	58.282		18	0.290967	0.350105
		19	491.735	480.786	1323.97	1258.68			19	10.949	65.294		19	0.308242	0.369325
		20	488.338	489.276	1259.36	1254.49			20	-0.938	4.87		20	0.22314	0.203695
		21	462.588	474.677	1197.88	1224.99			21	-12.089	-27.108		21	0.143307	0.116038
		22	470.213	484.635	1148.78	1182.05			22	-14.422	-33.268		22	0.126605	0.0991527
		23	455.353	459.729	1144.22	1213.66			23	-4.376	-69.44		23	0.198527	0

## Sheet: exp1 endosome10
endosome #10									background-adjusted				normalised
		frame #	Rab5(rim)	Rab5(background)	TfR(rim)	TfR(background)			frame #	Rab5	TfR		frame #	Rab5	TfR
		11	496.759	492.477	2062.59	1856.26			11	4.282	206.333		11	0.328535	0.963787
		12	499.871	512.715	1944.4	1735.52			12	-12.844	208.874		12	0.150538	0.97075
		13	496.664	517.483	1976.92	1803.63			13	-20.819	173.288		13	0.0676506	0.873233
		14	513.974	533.395	1964.36	1761.01			14	-19.421	203.35		14	0.0821805	0.955612
		15	513.138	538.413	2010.09	1889.3			15	-25.275	120.784		15	0.0213376	0.729356
		16	509.405	536.733	2013.31	1898.4			16	-27.328	114.909		16	0	0.713257
		17	497.974	518.587	1953.56	1813.61			17	-20.613	139.955		17	0.0697916	0.78189
		18	491.274	498.199	1920.04	1718.24			18	-6.925	201.796		18	0.212056	0.951354
		19	535.702	509.267	1916.54	1760.68			19	26.435	155.864		19	0.55878	0.825486
		20	550.667	506.951	1972.23	1752.68			20	43.716	219.548		20	0.738388	1
		21	575.969	520.156	1858.49	1663.29			21	55.813	195.203		21	0.864117	0.933287
		22	568.039	517.25	1690.91	1643.44			22	50.789	47.47		22	0.8119	0.528453
		23	550.03	509.383	1664.42	1665.85			23	40.647	-1.429		23	0.706491	0.394454
		24	574.479	505.592	1627.97	1595.21			24	68.887	32.757		24	1	0.488134
		25	583.121	521.148	1643.29	1549.74			25	61.973	93.546		25	0.92814	0.654715
		26	533.591	520.304	1453.23	1505.62			26	13.287	-52.393		26	0.422128	0.254797
		27	531.932	530.353	1363.66	1509.03			27	1.579	-145.374		27	0.300442	0

[truncated: 44 more sheets: exp1 endosome11, exp1 endosome12, exp1 endosome13, exp1 endosome14, exp1 endosome15, exp1 endosome16, exp1 endosome17, exp1 endosome18, exp1 endosome19, exp1 endosome20, exp1 endosome21, exp1 endosome22, exp1 endosome23, exp1 endosome24, exp1 time, exp1 aligned, exp2-endosome1, exp2-endosome2, exp2-endosome3, exp2-endosome4 …]
