# Supplementary material for: A novel live-cell imaging assay reveals regulation of endosome maturation
Source: eLife. 2021 Nov 30;10:e70982. doi: 10.7554/eLife.70982 (PMC8635980; doi:10.7554/eLife.70982)
Supplement: Figure 9—source data 3. [file elife-70982-fig9-data3.xlsx]

## Sheet: endosome1
endosome #1									background-adjusted				normalised
		frame #	Rab5(rim)	Rab5(background)	GalT(rim)	GalT(background)			frame #	Rab5	GalT		frame #	Rab5	GalT
		1	554.1	611.985	759.45	739.712			1	-57.885	19.738		1	0.14618	0.476405
		2	556.048	630.699	677.619	670.044			2	-74.651	7.575		2	0	0.253847
		3	539.75	590.639	657.58	641.486			3	-50.889	16.094		3	0.207177	0.409727
		4	534.478	590.777	659.054	636.73			4	-56.299	22.324		4	0.160008	0.523723				goes out of focus at t32
		5	528.707	580.736	640.446	630.926			5	-52.029	9.52		5	0.197238	0.289437
		6	543.923	581.667	641.567	609.679			6	-37.744	31.888		6	0.321787	0.698725
		7	555.37	578.378	646.611	603.817			7	-23.008	42.794		7	0.450268	0.898282
		8	545.046	579.439	643.861	612.762			8	-34.393	31.099		8	0.351004	0.684288
		9	557.958	575.034	659.575	611.222			9	-17.076	48.353		9	0.501988	1
		10	552.911	571.58	648.242	603.744			10	-18.669	44.498		10	0.488099	0.929461
		11	565.71	585.773	611.637	583.869			11	-20.063	27.768		11	0.475945	0.623337
		12	568.9	593.659	604.3	591.727			12	-24.759	12.573		12	0.435001	0.3453
		13	556.784	601.477	606.293	599.151			13	-44.693	7.142		13	0.261199	0.245924
		14	558.032	587.54	605.944	581.898			14	-29.508	24.046		14	0.393595	0.555232
		15	550.621	593.653	604.282	589.142			15	-43.032	15.14		15	0.275681	0.392271
		16	548.895	588.534	605.839	593.705			16	-39.639	12.134		16	0.305264	0.337267
		17	558.038	593.114	621.409	596.342			17	-35.076	25.067		17	0.345049	0.573914
		18	560.53	599.415	627.758	606.543			18	-38.885	21.215		18	0.311838	0.503431
		19	556.439	601.83	624.568	618.622			19	-45.391	5.946		19	0.255114	0.22404
		20	553.583	585.426	595.167	584.957			20	-31.843	10.21		20	0.373237	0.302062
		21	542.25	580.968	584.833	581.027			21	-38.718	3.806		21	0.313295	0.184882
		22	545.144	578.223	583.371	585.548			22	-33.079	-2.177		22	0.36246	0.0754058
		23	544.758	581.346	583.235	588.17			23	-36.588	-4.935		23	0.331866	0.0249401
		24	553.72	581.42	572.833	573.867			24	-27.7	-1.034		24	0.409359	0.0963203
		25	555.583	577.644	569.909	568.835			25	-22.061	1.074		25	0.458524	0.134892
		26	570.477	587.984	571.553	577.851			26	-17.507	-6.298		26	0.49823	0
		27	593.831	567.255	592.811	563.93			27	26.576	28.881		27	0.882583	0.643703
		28	609.608	569.565	596.77	561.65			28	40.043	35.12		28	1	0.757864
		29	593.25	562.12	590.824	559.98			29	31.13	30.844		29	0.922289	0.679622
		30	582.23	560.324	585.164	551.044			30	21.906	34.12		30	0.841866	0.739566
		31	582.421	561.642	585.092	558.951			31	20.779	26.141		31	0.83204	0.593566
		32	538.831	540.86	530.27	514.035			32	-2.029	16.235		32	0.63318	0.412307
		33	516.517	543.122	519.147	521.715			33	-26.605	-2.568		33	0.418906	0.0682513
		34	504.853	534.273	533.379	531.279			34	-29.42	2.1		34	0.394362	0.153666

## Sheet: endosome2
endosome #2									background-adjusted				normalised
		frame #	Rab5(rim)	Rab5(background)	GalT(rim)	GalT(background)			frame #	Rab5	GalT		frame #	Rab5	GalT
		34	561.25	544.025	531.736	518.505			34	17.225	13.231		34	0.248688	0
		35	566.465	553.225	539.236	522.695			35	13.24	16.541		35	0.207682	0.185872
		36	579.486	554.725	525.91	508.805			36	24.761	17.105		36	0.326233	0.217543
		37	576.486	547.94	521.729	501.835			37	28.546	19.894		37	0.365181	0.374158
		38	572.146	537.59	521.944	502.61			38	34.556	19.334		38	0.427024	0.342711
		39	595.771	546.915	529.569	506.925			39	48.856	22.644		39	0.57417	0.528583
		40	614.542	547.115	529.521	507.16			40	67.427	22.361		40	0.765265	0.512691
		41	628.382	550.71	531.854	500.815			41	77.672	31.039		41	0.870686	1
		42	641.299	551.06	513.229	489.075			42	90.239	24.154		42	1	0.613376
		43	618.153	549.11	511.118	483.185			43	69.043	27.933		43	0.781894	0.825584
		44	594.022	546.109	494.625	477.875			44	47.913	16.75		44	0.564467	0.197608
		45	581.201	531.475	495.556	474.29			45	49.726	21.266		45	0.583122	0.451202
		46	592.361	539.34	492.674	469.38			46	53.021	23.294		46	0.617028	0.565083
		47	591.722	538.52	492.333	469.71			47	53.202	22.623		47	0.61889	0.527403
		48	600.354	538.46	496.736	475.785			48	61.894	20.951		48	0.708331	0.433513
		49	582.799	531.87	505.333	474.42			49	50.929	30.913		49	0.595501	0.992925
		50	586.104	540.82	493.111	470.935			50	45.284	22.176		50	0.537414	0.502302
		51	590.229	544.31	497.056	472.93			51	45.919	24.126		51	0.543948	0.611804
		52	557.729	527.325	474.403	458.97			52	30.404	15.433		52	0.3843	0.123652
		53	557.472	529.575	479.264	457.505			53	27.897	21.759		53	0.358503	0.478886
		54	526.515	533.458	488.522	467.828			54	-6.943	20.694		54	0	0.419081
		55	543.213	533.276	494.051	465.557			55	9.937	28.494		55	0.173695	0.857087
		56	555.279	530.474	490.051	470.031			56	24.805	20.02		56	0.326686	0.381233
		57	544.735	528.547	482.794	459.427			57	16.188	23.367		57	0.238017	0.569182
		58	555.236	533.23	484.757	463.541			58	22.006	21.216		58	0.297884	0.448394
		59	561.107	530.628	484.721	462.643			59	30.479	22.078		59	0.385071	0.496799
		60	546.986	518.48	465.836	449.485			60	28.506	16.351		60	0.364769	0.175202

## Sheet: endosome3
endosome #3									background-adjusted				normalised
		frame #	Rab5(rim)	Rab5(background)	GalT(rim)	GalT(background)			frame #	Rab5	GalT		frame #	Rab5	GalT
		74	416.924	417.905	1023.03	1022.92			74	-0.981	0.11		74	0.1984	0.457596
		75	416.708	416.89	1004.67	1022.73			75	-0.182	-18.063		75	0.20668	0.230616
		76	419.562	417.81	1020.98	1032.63			76	1.752	-11.651		76	0.226722	0.310701
		77	411.812	412.305	1028.31	1048.77			77	-0.493	-20.464		77	0.203457	0.200627
		78	418.312	415.855	988.944	1025.3			78	2.457	-36.351		78	0.234028	0.00219824
		79	419.743	413.903	1001.3	1037.83			79	5.84	-36.527		79	0.269086	0
		80	440.382	428.42	1035.56	1060.56			80	11.962	-24.998		80	0.332528	0.143997
		81	442.108	426.37	1023.7	1045.17			81	15.738	-21.479		81	0.371659	0.18795
		82	484.831	436.01	1028.01	1047.05			82	48.821	-19.036		82	0.714499	0.218463
		83	513.354	451.165	1012.58	1040.67			83	62.189	-28.094		83	0.853032	0.105328
		84	505.993	453.05	999.146	1034.48			84	52.943	-35.334		84	0.757215	0.0149006
		85	489.194	445.715	987.181	1014.99			85	43.479	-27.809		85	0.65914	0.108888
		86	504.447	450.966	995.112	1019.66			86	53.481	-24.551		86	0.762791	0.14958
		87	461.402	424.804	999.277	979.354			87	36.598	19.923		87	0.587832	0.705061
		88	433.576	419.375	1007.75	966.504			88	14.201	41.251		88	0.355731	0.971448
		89	415.625	419.283	1009.04	986.171			89	-3.658	22.867		89	0.170658	0.741832
		90	416.75	422.138	987.006	977.5			90	-5.388	9.506		90	0.15273	0.574953
		91	409.665	417.72	978.756	995.957			91	-8.055	-17.201		91	0.125092	0.241382
		92	403.5	415.927	1009.07	1004.11			92	-12.427	4.966		92	0.0797849	0.518248
		93	401.119	412.983	1009.17	999.737			93	-11.864	9.433		93	0.0856192	0.574041
		94	400.131	413.789	1006.32	993.772			94	-13.658	12.546		94	0.067028	0.612922
		95	404.272	410.983	1009.6	977.521			95	-6.711	32.082		95	0.13902	0.856927
		96	408.935	414.296	1033.49	989.958			96	-5.361	43.537		96	0.15301	1
		97	407.989	416.512	1006.23	966.721			97	-8.523	39.507		97	0.120242	0.949665
		98	405.033	410.517	1025.29	984.629			98	-5.484	40.664		98	0.151735	0.964116
		99	409.033	417.333	1002.35	979.017			99	-8.3	23.331		99	0.122553	0.747627
		100	418.62	421.533	1005.35	977.254			100	-2.913	28.094		100	0.178379	0.807117
		101	434.565	431.462	988.451	968.983			101	3.103	19.468		101	0.240723	0.699378
		102	475.81	428.832	967.915	949.691			102	46.978	18.224		102	0.6954	0.68384
		103	526.207	452.254	945.861	938.553			103	73.953	7.308		103	0.974942	0.5475
		104	510.811	434.44	961.132	937.646			104	76.371	23.486		104	1	0.749563
		105	484.896	427.851	949.057	935.239			105	57.045	13.818		105	0.799724	0.628809
		106	479.443	423.224	963.524	959.851			106	56.219	3.673		106	0.791164	0.502098
		107	470.396	417.91	966.25	964.981			107	52.486	1.269		107	0.752479	0.472072
		108	475.071	420.694	983.08	978.504			108	54.377	4.576		108	0.772076	0.513377
		109	460.514	418.287	986.574	982.596			109	42.227	3.978		109	0.646165	0.505908
		110	442.843	407.342	919.868	924.081			110	35.501	-4.213		110	0.576464	0.403602
		111	441.24	413.208	943.574	938.173			111	28.032	5.401		111	0.499062	0.523681
		112	442.907	409.412	954.858	945.296			112	33.495	9.562		112	0.555675	0.575652
		113	452.02	419.262	951.115	951.298			113	32.758	-0.183		113	0.548038	0.453937
		114	453.505	416.816	936.525	928.648			114	36.689	7.877		114	0.588775	0.554606
		115	432.675	408.844	923.715	903.223			115	23.831	20.492		115	0.455527	0.712168
		116	422.275	408.453	932.265	926.027			116	13.822	6.238		116	0.351804	0.534135
		117	434.486	402.914	959.821	941.437			117	31.572	18.384		117	0.535747	0.685839
		118	426.42	403.112	965.524	942.485			118	23.308	23.039		118	0.450107	0.74398
		119	433.783	404.459	974.146	953.757			119	29.324	20.389		119	0.512451	0.710881
		120	415.836	404.485	1001.32	980.801			120	11.351	20.517		120	0.326197	0.71248
		121	409.105	392.684	990.9	956.39			121	16.421	34.51		121	0.378737	0.887253
		122	396.226	390.776	987.415	963.146			122	5.45	24.269		122	0.265045	0.759343
		123	388.755	387.885	1006.32	980.973			123	0.87	25.346		123	0.217582	0.772794
		124	386.77	387.042	1001.28	979.458			124	-0.272	21.826		124	0.205747	0.728829
		125	386.509	387.172	992.75	958.653			125	-0.663	34.097		125	0.201695	0.882094
		126	382.029	386.05	969.324	955.819			126	-4.021	13.505		126	0.166896	0.6249
		127	379.211	389.604	966.838	951.246			127	-10.393	15.592		127	0.100863	0.650967
		128	393.255	394.257	975.882	948.586			128	-1.002	27.296		128	0.198182	0.79715
		129	380.77	400.896	939.76	922.973			129	-20.126	16.787		129	0	0.665892
		130	379.926	391.912	950	923.173			130	-11.986	26.827		130	0.084355	0.791292
		131	382.946	399.8	957.721	936.3			131	-16.854	21.421		131	0.0339078	0.723771
		132	374.681	390.623	949.819	922.808			132	-15.942	27.011		132	0.0433589	0.79359
		133	372.186	386.565	951.407	928.988			133	-14.379	22.419		133	0.0595563	0.736236
		134	375.75	386.508	948.657	924.488			134	-10.758	24.169		134	0.0970807	0.758094
		135	370.75	386.145	944.04	922.594			135	-15.395	21.446		135	0.0490274	0.724083
		136	369.715	385.551	946.88	922.672			136	-15.836	24.208		136	0.0444573	0.758581
		137	368.87	386.29	940.565	923.639			137	-17.42	16.926		137	0.0280423	0.667628
		138	365.41	383.282	930.77	923.238			138	-17.872	7.532		138	0.0233582	0.550297
		139	370.417	380.638	925.784	908.785			139	-10.221	16.999		139	0.102646	0.66854
		140	367.824	382.904	920.882	906.154			140	-15.08	14.728		140	0.0522918	0.640175
		141	365.069	378.25	912.755	882.608			141	-13.181	30.147		141	0.0719711	0.832759
		142	367.549	381.835	908.069	884.588			142	-14.286	23.481		142	0.06052	0.7495
		143	373.167	384.373	919.99	888.738			143	-11.206	31.252		143	0.0924381	0.84656

## Sheet: endosome4
endosome #4									background-adjusted				normalised
		frame #	Rab5(rim)	Rab5(background)	GalT(rim)	GalT(background)			frame #	Rab5	GalT		frame #	Rab5	GalT
		62	411.048	401.184	797.071	802.86			62	9.864	-5.789		62	0.184763	0.383098
		63	422.238	412.184	810.417	806.515			63	10.054	3.902		63	0.186522	0.467529
		64	407.238	400.037	804.214	788.926			64	7.201	15.288		64	0.160115	0.566728
		65	403.631	392.831	778.488	788.89			65	10.8	-10.402		65	0.193427	0.342908
		66	401.31	397.846	797.155	785.096			66	3.464	12.059		66	0.125526	0.538596
		67	401.131	395.029	830.536	797.081			67	6.102	33.455		67	0.149943	0.725004
		68	402.774	398.044	806.536	793.846			68	4.73	12.69		68	0.137244	0.544093
		69	411.488	419.25	816.429	801.265			69	-7.762	15.164		69	0.0216214	0.565647
		70	384.476	394.574	822.571	815.5			70	-10.098	7.071		70	0	0.495139
		71	381.536	386.338	845.429	811.559			71	-4.802	33.87		71	0.0490184	0.72862
		72	390.881	396.243	835.357	831.809			72	-5.362	3.548		72	0.0438352	0.464445
		73	386.107	383.706	802.381	812.206			73	2.401	-9.825		73	0.115688	0.347935
		74	392.19	391.684	843.333	795.294			74	0.506	48.039		74	0.0981479	0.852065
		75	385.048	382.956	857.512	792.493			75	2.092	65.019		75	0.112828	1
		76	427.679	388.426	796.75	795.162			76	39.253	1.588		76	0.45678	0.447369
		77	466.227	395.66	724.261	759.799			77	70.567	-35.538		77	0.746615	0.123915
		78	460.216	396.382	700.42	750.181			78	63.834	-49.761		78	0.684296	0
		79	388.284	378.368	693.102	716.528			79	9.916	-23.426		79	0.185244	0.229439
		80	488.556	390.613	709.685	729.237			80	97.943	-19.552		80	1	0.26319
		81	421.885	378.641	696.913	739.263			81	43.244	-42.35		81	0.49372	0.064567
		82	437.596	382.231	717.375	747.019			82	55.365	-29.644		82	0.605909	0.175266
		83	426.346	376.295	721.01	745.526			83	50.051	-24.516		83	0.556724	0.219942
		84	423.75	375.641	710.615	730.705			84	48.109	-20.09		84	0.538749	0.258503
		85	440.558	380.442	713.788	713.109			85	60.116	0.679		85	0.649883	0.439449
		86	426.375	381.442	725.865	751.936			86	44.933	-26.071		86	0.509353	0.206395
		87	427.981	379.788	714.173	730.929			87	48.193	-16.756		87	0.539527	0.28755
		88	426.106	379.481	717.231	731.776			88	46.625	-14.545		88	0.525014	0.306813
		89	414.952	374.519	731.337	750.647			89	40.433	-19.31		89	0.467702	0.265299
		90	411.194	371.587	724.157	748.406			90	39.607	-24.249		90	0.460057	0.222269
		91	423.463	382.531	749.741	775.181			91	40.932	-25.44		91	0.472321	0.211892
		92	446.269	386.906	760.519	761.225			92	59.363	-0.706		92	0.642913	0.427383
		93	407.583	379.594	800.333	790.875			93	27.989	9.458		93	0.352524	0.515935
		94	421.048	386.327	790.01	786.763			94	34.721	3.247		94	0.414833	0.461823
		95	412.606	374.244	778.24	775.147			95	38.362	3.093		95	0.448533	0.460481
		96	408.221	376.519	786.481	778.603			96	31.702	7.878		96	0.38689	0.502169
		97	390.51	371.006	799.019	803.5			97	19.504	-4.481		97	0.273989	0.394494
		98	388.038	372.635	804.49	805.545			98	15.403	-1.055		98	0.236031	0.424342
		99	388.058	369.974	798.423	791.442			99	18.084	6.981		99	0.260845	0.494354
		100	384.798	371.981	821.769	801.679			100	12.817	20.09		100	0.212095	0.608564
		101	375.885	366.929	807.981	806.994			101	8.956	0.987		101	0.176359	0.442133
		102	377.221	366.256	816.298	809.122			102	10.965	7.176		102	0.194954	0.496053
		103	374.625	364.16	810.981	790.167			103	10.465	20.814		103	0.190326	0.614872

## Sheet: endosome5
endosome #5									background-adjusted				normalised
		frame #	Rab5(rim)	Rab5(background)	GalT(rim)	GalT(background)			frame #	Rab5	GalT		frame #	Rab5	GalT
		48	390.179	397.993	876.643	899.022			48	-7.814	-22.379		48	0.0630635	0.000638002
		49	396.655	397.015	911.44	933.89			49	-0.36	-22.45		49	0.144027	0
		50	396.205	396.604	876.148	890			50	-0.399	-13.852		50	0.143604	0.0772611
		51	411.92	394.875	897.443	901.806			51	17.045	-4.363		51	0.333076	0.162529
		52	445.75	394.194	879.614	895.681			52	51.556	-16.067		52	0.707927	0.0573572
		53	432.193	390.535	886.875	898.861			53	41.658	-11.986		53	0.600417	0.0940288
		54	449.281	395.276	897.417	902.592			54	54.005	-5.175		54	0.734527	0.155232
		55	468.396	397.697	892.688	890.092			55	70.699	2.596		55	0.915854	0.225062
		56	450.26	393.684	893.104	879.158			56	56.576	13.946		56	0.762453	0.327052
		57	435.375	387.349	895.865	884.428			57	48.026	11.437		57	0.669585	0.304506
		58	449.656	395.059	879.74	858.684			58	54.597	21.056		58	0.740958	0.390942
		59	444.5	391.724	907.521	880.605			59	52.776	26.916		59	0.721178	0.4436
		60	472.75	394.304	903.37	872.291			60	78.446	31.079		60	1	0.481008
		61	444.609	388.061	902.522	870.797			61	56.548	31.725		61	0.762149	0.486813
		62	471.75	397.507	895.385	862.013			62	74.243	33.372		62	0.954348	0.501613
		63	469.511	412.885	883.37	862.919			63	56.626	20.451		63	0.762996	0.385506
		64	460.554	397.757	886.043	851.466			64	62.797	34.577		64	0.830024	0.512441
		65	424.354	390.934	878.25	855.224			65	33.42	23.026		65	0.510938	0.408644
		66	451.323	397.368	893.177	868.151			66	53.955	25.026		66	0.733984	0.426616
		67	432.292	393.645	859.365	850.737			67	38.647	8.628		67	0.567712	0.279265
		68	435.969	396.263	877.812	838.362			68	39.706	39.45		68	0.579215	0.55623
		69	458.781	425.151	850.177	826.75			69	33.63	23.427		69	0.513219	0.412248
		70	434.292	401	883.635	850.553			70	33.292	33.082		70	0.509547	0.499007
		71	425.5	396.296	889.781	843.776			71	29.204	46.005		71	0.465145	0.615132
		72	450.917	402.941	892.875	837.678			72	47.976	55.197		72	0.669042	0.697731
		73	423.74	396.257	941.052	852.217			73	27.483	88.835		73	0.446451	1
		74	428.75	400.855	909.854	847.664			74	27.895	62.19		74	0.450927	0.76057
		75	406.394	394.372	906.019	848.064			75	12.022	57.955		75	0.278518	0.722514
		76	424.08	399.776	896.52	841.928			76	24.304	54.592		76	0.411922	0.692295
		77	408.02	408.711	875.37	827.224			77	-0.691	48.146		77	0.140432	0.634371
		78	421.43	424.25	873.45	826.25			78	-2.82	47.2		78	0.117307	0.625871
		79	404.85	398.599	825.14	813.763			79	6.251	11.377		79	0.215834	0.303967
		80	408.72	415.947	818.28	804.092			80	-7.227	14.188		80	0.0694393	0.329227
		81	391.37	397.401	800.23	780.158			81	-6.031	20.072		81	0.08243	0.3821
		82	395.85	408.382	801.86	775.882			82	-12.532	25.978		82	0.0118176	0.435171
		83	386.31	399.559	779.17	756.934			83	-13.249	22.236		83	0.00402972	0.401546
		84	383.15	396.77	784.93	764.388			84	-13.62	20.542		84	0	0.386323

## Sheet: endosome6
endosome #6									background-adjusted				normalised
		frame #	Rab5(rim)	Rab5(background)	GalT(rim)	GalT(background)			frame #	Rab5	GalT		frame #	Rab5	GalT
		47	428.135	420.675	779.885	740.2			47	7.46	39.685		47	0.185404	0.107966
		48	413.91	411.985	776.667	741.04			48	1.925	35.627		48	0.118528	0
		49	422.951	416.375	770.764	723.15			49	6.576	47.614		49	0.174724	0.318922
		50	414.779	419.37	773.493	712.505			50	-4.591	60.988		50	0.0397994	0.674746
		51	418.912	419.714	781.596	728.141			51	-0.802	53.455		51	0.0855797	0.474326
		52	414.875	410.229	776.272	721.917			52	4.646	54.355		52	0.151405	0.498271
		53	415.434	415.448	765.11	712.531			53	-0.014	52.579		53	0.0951006	0.451019
		54	410.735	415.37	769.441	713.156			54	-4.635	56.285		54	0.0392678	0.54962
		55	404.397	408.359	759.544	716.583			55	-3.962	42.961		55	0.0473993	0.195126
		56	406.434	408.109	739.757	701.224			56	-1.675	38.533		56	0.0750317	0.077316
		57	402.125	404.516	747.368	700.078			57	-2.391	47.29		57	0.0663807	0.310302
		58	412.056	410.17	723.812	676.64			58	1.886	47.172		58	0.118057	0.307162
		59	396.292	395.805	718.118	664.99			59	0.487	53.128		59	0.101154	0.465625
		60	399.382	395.21	728.486	677.705			60	4.172	50.781		60	0.145678	0.403182
		61	404.819	400.025	731.604	681.54			61	4.794	50.064		61	0.153193	0.384106
		62	399.421	391.454	717.693	668.291			62	7.967	49.402		62	0.19153	0.366493
		63	413.5	407.536	727.057	688.699			63	5.964	38.358		63	0.167329	0.07266
		64	399.271	394.668	717.621	670.224			64	4.603	47.397		64	0.150885	0.313149
		65	407.419	394.896	719.926	674.786			65	12.523	45.14		65	0.246578	0.2531
		66	424.354	393.13	717.208	675.56			66	31.224	41.648		66	0.472531	0.160193
		67	434.493	400.923	729.171	691.811			67	33.57	37.36		67	0.500876	0.0461076
		68	450.432	397.315	717.311	673.645			68	53.117	43.666		68	0.737051	0.213883
		69	493.618	425.32	728.208	679.33			69	68.298	48.878		69	0.920474	0.352551
		70	464.167	397.665	723.694	674.335			70	66.502	49.359		70	0.898774	0.365349
		71	455.541	395.285	725.953	680.555			71	60.256	45.398		71	0.823307	0.259964
		72	471.858	401.72	723.088	674.675			72	70.138	48.413		72	0.942705	0.34018
		73	458.694	398.41	730.25	681.065			73	60.284	49.185		73	0.823645	0.360719
		74	456.277	396.115	727.791	672.52			74	60.162	55.271		74	0.822171	0.522641
		75	460.704	396.833	725.349	673.794			75	63.871	51.555		75	0.866985	0.423775
		76	428.447	381.868	734.599	670.387			76	46.579	64.212		76	0.658056	0.760523
		77	465.566	390.686	725.888	674.76			77	74.88	51.128		77	1	0.412414
		78	435.816	388.716	723.697	680.75			78	47.1	42.947		78	0.664351	0.194753
		79	449.053	386.819	717.533	665.225			79	62.234	52.308		79	0.847206	0.443809
		80	462.368	394.382	713.632	662.618			80	67.986	51.014		80	0.916704	0.409381
		81	448.691	390.598	709.026	665.216			81	58.093	43.81		81	0.797173	0.217714
		82	466.211	395.005	714.75	673.025			82	71.206	41.725		82	0.955609	0.162241
		83	450.034	394.44	711.25	660.415			83	55.594	50.835		83	0.766979	0.404619
		84	444.986	393.595	709.128	669.015			84	51.391	40.113		84	0.716196	0.119353
		85	442.716	389.995	709.432	661.17			85	52.721	48.262		85	0.732266	0.336162
		86	436.385	392.745	711.264	660.935			86	43.64	50.329		86	0.622546	0.391156
		87	433.645	383.593	704.645	651.936			87	50.052	52.709		87	0.700018	0.454478
		88	440.579	385.691	686.803	632.814			88	54.888	53.989		88	0.758449	0.488533
		89	419.092	379.569	685.789	637.466			89	39.523	48.323		89	0.572803	0.337785
		90	397.296	374.926	687.803	634.966			90	22.37	52.837		90	0.365553	0.457883
		91	394.309	376.765	685.257	640.123			91	17.544	45.134		91	0.307243	0.25294
		92	379.026	366.971	668.526	624.539			92	12.055	43.987		92	0.240923	0.222423
		93	369.455	365.118	677.526	622.486			93	4.337	55.04		93	0.147671	0.516496
		94	365.833	361.811	670.141	622.844			94	4.022	47.297		94	0.143865	0.310488
		95	363.921	362.096	673.829	615.26			95	1.825	58.569		95	0.11732	0.610387
		96	366.27	367.01	659.237	596.361			96	-0.74	62.876		96	0.0863288	0.724977
		97	360.054	364.34	656.48	588.935			97	-4.286	67.545		97	0.0434846	0.849199
		98	362.912	363.485	669.588	596.375			98	-0.573	73.213		98	0.0883465	1
		99	363.574	363.045	666.162	597.795			99	0.529	68.367		99	0.101661	0.871069
		100	355.581	358.29	642.189	584.25			100	-2.709	57.939		100	0.0625385	0.593625
		101	356.642	357.025	650.108	586.765			101	-0.383	63.343		101	0.0906422	0.737402
		102	359.568	364.465	662.696	599.585			102	-4.897	63.111		102	0.0361022	0.73123
		103	357.791	362.52	660.885	599.22			103	-4.729	61.665		103	0.0381321	0.692758
		104	359.02	366.905	659.946	602.385			104	-7.885	57.561		104	0	0.583568
		105	351.986	358.7	651.405	591.465			105	-6.714	59.94		105	0.0141485	0.646863

## Sheet: endosome7
endosome #7									background-adjusted				normalised
		frame #	Rab5(rim)	Rab5(background)	GalT(rim)	GalT(background)			frame #	Rab5	GalT		frame #	Rab5	GalT
		1	532.823	566.375	254.562	189.474			1	-33.552	65.088		1	0.20429	1
		2	511.49	556.086	241.062	181.138			2	-44.596	59.924		2	0.135621	0.901428
		3	518.083	554.862	246.323	186.099			3	-36.779	60.224		3	0.184226	0.907154
		4	512.094	548.579	247.875	187.572			4	-36.485	60.303		4	0.186054	0.908662
		5	498.271	542.414	243.635	184.743			5	-44.143	58.892		5	0.138438	0.881729
		6	481.917	534.539	240.927	183.75			6	-52.622	57.177		6	0.0857178	0.848992
		7	475.219	529.947	241.656	184.158			7	-54.728	57.498		7	0.0726233	0.855119
		8	502.1	549.842	241.05	185.776			8	-47.742	55.274		8	0.11606	0.812667
		9	502.062	546.52	239.615	197.691			9	-44.458	41.924		9	0.13648	0.557838
		10	501.365	540.395	243.865	205.658			10	-39.03	38.207		10	0.170229	0.486886
		11	489.771	540.724	249.719	197.704			11	-50.953	52.015		11	0.0960953	0.750458
		12	475.875	517.697	241.885	195.303			12	-41.822	46.582		12	0.152869	0.646751
		13	492.942	529.692	240.75	192.199			13	-36.75	48.551		13	0.184406	0.684336
		14	491.144	523.077	237.846	194.538			14	-31.933	43.308		14	0.214357	0.584256
		15	489.154	519.423	236.423	196.718			15	-30.269	39.705		15	0.224703	0.515481
		16	479	515.244	235.99	194.436			16	-36.244	41.554		16	0.187552	0.550775
		17	478.173	528.603	236.933	197.526			17	-50.43	39.407		17	0.0993471	0.509792
		18	466.894	508.506	227.74	194.122			18	-41.612	33.618		18	0.154175	0.39929
		19	472.481	508.167	229.115	196.16			19	-35.686	32.955		19	0.191022	0.386634
		20	474.788	511.013	239.865	188.077			20	-36.225	51.788		20	0.18767	0.746125
		21	481.471	509.853	235.365	187.705			21	-28.382	47.66		21	0.236436	0.667328
		22	496.26	508.859	234.885	192.577			22	-12.599	42.308		22	0.334571	0.565168
		23	514.135	521.577	235.788	189.769			23	-7.442	46.019		23	0.366636	0.636004
		24	562.154	523.769	236.798	193.359			24	38.385	43.439		24	0.651576	0.586757
		25	623.343	528.921	232.722	190.634			25	94.422	42.088		25	1	0.560968
		26	584.731	525.512	238.333	190.159			26	59.219	48.174		26	0.781117	0.67714
		27	602.306	522.195	236.231	190.53			27	80.111	45.701		27	0.911018	0.629934
		28	581.583	527.287	237.074	191.61			28	54.296	45.464		28	0.750507	0.62541
		29	541.311	515.19	228.356	196.897			29	26.121	31.459		29	0.575322	0.358078
		30	530.656	519.039	229.461	194.944			30	11.617	34.517		30	0.48514	0.41645
		31	478.961	497.344	223.523	194.489			31	-18.383	29.034		31	0.298607	0.311789
		32	461.3	487.773	209.325	196.625			32	-26.473	12.7		32	0.248306	0
		33	447.713	484.122	212.222	196.36			33	-36.409	15.862		33	0.186526	0.0603573
		34	447.444	487.268	209.731	194.226			34	-39.824	15.505		34	0.165293	0.0535428
		35	436.889	472.688	211.019	192.463			35	-35.799	18.556		35	0.190319	0.111781
		36	444.231	479.738	207.574	192.044			36	-35.507	15.53		36	0.192135	0.05402
		37	440.935	489.562	204.509	187.425			37	-48.627	17.084		37	0.110558	0.0836833
		38	458.972	484.206	209.509	190.231			38	-25.234	19.278		38	0.256009	0.125563
		39	447.058	480.737	209.529	188.244			39	-33.679	21.285		39	0.203501	0.163873
		40	446.028	481.311	214.028	191.189			40	-35.283	22.839		40	0.193527	0.193537
		41	442.083	481.439	206.731	188.768			41	-39.356	17.963		41	0.168202	0.100462
		42	438.472	483.238	211.593	190.372			42	-44.766	21.221		42	0.134564	0.162652
		43	442.694	489.494	211.611	191.47			43	-46.8	20.141		43	0.121918	0.142036
		44	454.019	502.756	209.787	189.232			44	-48.737	20.555		44	0.109874	0.149939
		45	459.389	506.366	209.787	189.994			45	-46.977	19.793		45	0.120817	0.135394
		46	460.972	505.232	204.972	186.512			46	-44.26	18.46		46	0.137711	0.109949
		47	446.861	498.97	202.713	181.409			47	-52.109	21.304		47	0.0889075	0.164236
		48	459.037	513.799	199.806	181.146			48	-54.762	18.66		48	0.0724119	0.113767
		49	447	509.378	200.935	182.341			49	-62.378	18.594		49	0.0250575	0.112507
		50	432.917	499.325	200.074	183.637			50	-66.408	16.437		50	0	0.0713331

## Sheet: endosome8
endosome #8									background-adjusted				normalised
		frame #	Rab5(rim)	Rab5(background)	GalT(rim)	GalT(background)			frame #	Rab5	GalT		frame #	Rab5	GalT
		35	432.44	422.605	379.043	340.453			35	9.835	38.59		35	0.126659	0.679033
		36	429.069	419.698	363.681	334.738			36	9.371	28.943		36	0.123496	0.482388
		37	426.095	416.436	354.138	327.634			37	9.659	26.504		37	0.125459	0.432672
		38	432.802	423.901	372.457	338.698			38	8.901	33.759		38	0.120293	0.580558
		39	430.707	421.256	373.043	335.5			39	9.451	37.543		39	0.124041	0.657691
		40	435.397	426.093	380.198	338.901			40	9.304	41.297		40	0.123039	0.734213
		41	433.957	429.291	372.784	336.988			41	4.666	35.796		41	0.0914259	0.62208
		42	428.966	422.744	367.569	332.814			42	6.222	34.755		42	0.102032	0.60086
		43	431.112	424.337	359.034	327.419			43	6.775	31.615		43	0.105801	0.536854
		44	450.308	439.449	370.533	331.006			44	10.859	39.527		44	0.133639	0.698133
		45	447.942	437.676	383.342	329.006			45	10.266	54.336		45	0.129597	1
		46	446.575	436.722	364	322.045			46	9.853	41.955		46	0.126782	0.747625
		47	444.153	438.932	367.589	323.068			47	5.221	44.521		47	0.0952089	0.799931
		48	440.419	432.835	369.242	319.972			48	7.584	49.27		48	0.111316	0.896734
		49	442.435	433.676	370.008	319.301			49	8.759	50.707		49	0.119325	0.926026
		50	444.594	430.339	358.227	314.622			50	14.255	43.605		50	0.156787	0.781259
		51	454.078	445.156	363.75	311.511			51	8.922	52.239		51	0.120436	0.957255
		52	436.234	418.506	366.395	313.58			52	17.728	52.815		52	0.180459	0.968996
		53	443.411	426.267	358.79	308.96			53	17.144	49.83		53	0.176479	0.90815
		54	460.065	427.619	356.5	312.057			54	32.446	44.443		54	0.28078	0.798341
		55	510.091	430.668	358.568	307.609			55	79.423	50.959		55	0.600986	0.931163
		56	585.5	447.538	354.106	305.576			56	137.962	48.53		56	1	0.88165
		57	500.833	429.902	347	301.168			57	70.931	45.832		57	0.543102	0.826654
		58	494.439	428.386	350.371	303.658			58	66.053	46.713		58	0.509853	0.844612
		59	503.053	431.022	345.356	304.75			59	72.031	40.606		59	0.5506	0.720127
		60	502.068	432.592	347.962	301.495			60	69.476	46.467		60	0.533185	0.839598
		61	485.53	427.891	341.871	299.592			61	57.639	42.279		61	0.452501	0.75423
		62	494.348	442.81	320.932	297.56			62	51.538	23.372		62	0.410915	0.368829
		63	562.265	467.217	330.47	294.755			63	95.048	35.715		63	0.707489	0.620429
		64	514.477	446.19	325.538	295.853			64	68.287	29.685		64	0.52508	0.497513
		65	511.705	445.446	322.765	295			65	66.259	27.765		65	0.511257	0.458376
		66	535.875	445.021	317.971	288.448			66	90.854	29.523		66	0.678902	0.494211
		67	533.333	447.574	325.303	294.824			67	85.759	30.479		67	0.644173	0.513698
		68	533.886	445.846	325.424	293.867			68	88.04	31.557		68	0.659721	0.535672
		69	526.697	448.484	328.258	297.824			69	78.213	30.434		69	0.592738	0.512781
		70	523.53	445.059	323.932	295.255			70	78.471	28.677		70	0.594497	0.476966
		71	531.636	444.686	327.326	296.468			71	86.95	30.858		71	0.652291	0.521424
		72	520.167	441.936	325.72	295.213			72	78.231	30.507		72	0.592861	0.514269
		73	525.129	444.92	326.583	297.862			73	80.209	28.721		73	0.606343	0.477863
		74	518.303	439.468	324.742	297.697			74	78.835	27.045		74	0.596978	0.443699
		75	511.689	439.84	330.424	300.037			75	71.849	30.387		75	0.54936	0.511823
		76	498.909	430.644	319.947	293.298			76	68.265	26.649		76	0.52493	0.435627
		77	533.22	444.734	320.992	295.394			77	88.486	25.598		77	0.662761	0.414204
		78	482.583	429.288	310.076	293.571			78	53.295	16.505		78	0.422892	0.228852
		79	514.72	438.144	308.902	291.436			79	76.576	17.466		79	0.58158	0.248441
		80	509.485	438.58	305.091	294.452			80	70.905	10.639		80	0.542925	0.109279
		81	500.803	443.625	305.492	289.859			81	57.178	15.633		81	0.449359	0.211077
		82	508.758	446.543	299.068	289.516			82	62.215	9.552		82	0.483692	0.0871214
		83	492.515	444.837	312.871	296.293			83	47.678	16.578		83	0.384605	0.23034
		84	494.992	439.689	293.328	284.361			84	55.303	8.967		84	0.436579	0.0751967
		85	462.79	429.153	293.435	283.045			85	33.637	10.39		85	0.288898	0.104203
		86	455.218	423.994	294.161	280.864			86	31.224	13.297		86	0.272451	0.16346
		87	478.153	432.722	293.944	280.08			87	45.431	13.864		87	0.369289	0.175017
		88	456.089	422.273	289.798	277.426			88	33.816	12.372		88	0.290119	0.144604
		89	437.629	411.051	290.444	275.688			89	26.578	14.756		89	0.240783	0.1932
		90	395.483	400.11	297.155	284.977			90	-4.627	12.178		90	0.0280828	0.14065
		91	377.155	383.581	291.491	280.134			91	-6.426	11.357		91	0.0158204	0.123915
		92	371.152	379.899	299.688	290.571			92	-8.747	9.117		92	0	0.0782543
		93	369.433	374.841	288.092	279.205			93	-5.408	8.887		93	0.0227593	0.073566
		94	375.267	381.778	293.45	285.307			94	-6.511	8.143		94	0.0152411	0.0584003
		95	376.717	379.511	290.992	281.83			95	-2.794	9.162		95	0.0405769	0.0791716
		96	383.808	389.085	298.083	286.153			96	-5.277	11.93		96	0.0236523	0.135595
		97	388.483	391.597	293.442	284.79			97	-3.114	8.652		97	0.0383957	0.0687757
		98	394.225	392.705	298.392	284.955			98	1.52	13.437		98	0.0699821	0.166313
		99	387.583	392.71	300.042	287.074			99	-5.127	12.968		99	0.0246747	0.156753
		100	389.7	389.614	299.917	288.79			100	0.086	11.127		100	0.0602076	0.119226
		101	388.575	394.716	295.217	284.466			101	-6.141	10.751		101	0.0177631	0.111562
		102	384.25	389.017	288.319	283.041			102	-4.767	5.278		102	0.0271285	0
		103	381.105	384	298.911	285.068			103	-2.895	13.843		103	0.0398885	0.174589
		104	382.508	382.994	297.887	287.08			104	-0.486	10.807		104	0.0563087	0.112703
		105	386.935	386.29	294.726	283.693			105	0.645	11.033		105	0.0640179	0.11731
		106	386.516	384.983	290.234	278.067			106	1.533	12.167		106	0.0700707	0.140426
		107	387.414	386.456	291.758	279.661			107	0.958	12.097		107	0.0661514	0.138999
		108	387.258	392.772	295.094	284.211			108	-5.514	10.883		108	0.0220368	0.114253
		109	384.766	392.335	292.597	283.915			109	-7.569	8.682		109	0.0080295	0.0693873
		110	392.78	387.571	306.682	278.478			110	5.209	28.204		110	0.0951271	0.467324
		111	386.197	385.717	307.75	281.467			111	0.48	26.283		111	0.0628932	0.428167
		112	385.659	381.755	300.674	274.788			112	3.904	25.886		112	0.0862319	0.420074
		113	382.659	378.878	299.061	273.915			113	3.781	25.146		113	0.0853935	0.40499
		114	383.844	382.233	301.82	278.172			114	1.611	23.648		114	0.0706023	0.374455
		115	383.07	384.206	299.945	273.472			115	-1.136	26.473		115	0.0518782	0.43204
		116	383	379.154	306.311	281.362			116	3.846	24.949		116	0.0858366	0.400974
		117	378.598	378.803	306.97	280.42			117	-0.205	26.55		117	0.0582241	0.433609
		118	375.114	377.851	305.53	283.415			118	-2.737	22.115		118	0.0409654	0.343206
		119	375.068	374.176	302.485	279.596			119	0.892	22.889		119	0.0657015	0.358983
		120	373.394	376.326	304.871	282.75			120	-2.932	22.121		120	0.0396363	0.343328
		121	375.962	375.16	303.902	281.936			121	0.802	21.966		121	0.065088	0.340169
		122	377.955	379.356	305.439	281.404			122	-1.401	24.035		122	0.0500719	0.382343
		123	374.359	382.156	306.938	288.328			123	-7.797	18.61		123	0.0064754	0.27176
		124	374.162	374.344	303.051	283.974			124	-0.182	19.077		124	0.0583809	0.281279
		125	374.909	376.685	306.273	288.364			125	-1.776	17.909		125	0.0475158	0.257471

## Sheet: endosome9
endosome #9									background-adjusted				normalised
		frame #	Rab5(rim)	Rab5(background)	GalT(rim)	GalT(background)			frame #	Rab5	GalT		frame #	Rab5	GalT
		79	465.889	453.67	1174.36	1152.91			79	12.219	21.451		79	0.364998	0.521629
		80	427.785	448.1	1199.55	1167.58			80	-20.315	31.969		80	0.00547016	0.590277
		81	446.48	462.471	1212.68	1179.3			81	-15.991	33.379		81	0.0532539	0.599479
		82	442.033	452.688	1233.89	1181.54			82	-10.655	52.345		82	0.112221	0.723264
		83	440.197	456.662	1244.64	1189.79			83	-16.465	54.856		83	0.0480158	0.739652
		84	450.204	458.142	1233.82	1192.61			84	-7.938	41.209		84	0.142246	0.650583
		85	436.526	447.681	1229.4	1182.93			85	-11.155	46.47		85	0.106696	0.68492
		86	437.974	452.108	1236.49	1186.48			86	-14.134	50.007		86	0.0737753	0.708004
		87	450.147	445.132	1253.57	1158.83			87	5.015	94.746		87	0.285387	1
		88	435.891	437.542	1194.96	1126.99			88	-1.651	67.971		88	0.211723	0.825249
		89	445.474	447.358	1184.07	1148.21			89	-1.884	35.86		89	0.209148	0.615672
		90	429.184	437.26	1189.23	1155.31			90	-8.076	33.921		90	0.140721	0.603017
		91	438.538	431.943	1190.39	1132.19			91	6.595	58.198		91	0.302848	0.761464
		92	423.904	424.392	1175.79	1120.89			92	-0.488	54.901		92	0.224575	0.739946
		93	425.833	433.613	1229.08	1153.89			93	-7.78	75.196		93	0.143992	0.872404
		94	425.519	427.684	1248.81	1163.99			94	-2.165	84.828		94	0.206043	0.935269
		95	423.737	426.033	1208.31	1144.96			95	-2.296	63.35		95	0.204595	0.795089
		96	417.41	424.113	1190.33	1128.48			96	-6.703	61.846		96	0.155894	0.785273
		97	423.179	420.528	1200.35	1129.32			97	2.651	71.03		97	0.259263	0.845214
		98	515.596	445.915	1136.63	1114.45			98	69.681	22.187		98	1	0.526433
		99	504.594	436.88	1187.19	1115.84			99	67.714	71.345		99	0.978263	0.84727
		100	497.725	437.287	1187.56	1131.88			100	60.438	55.678		100	0.897857	0.745017
		101	477.287	430.855	1166.82	1141.05			101	46.432	25.767		101	0.743079	0.549798
		102	471.194	433.444	1198.51	1153.1			102	37.75	45.409		102	0.647136	0.677995
		103	457.75	425.435	1184.83	1148.47			103	32.315	36.357		103	0.587075	0.618916
		104	468.444	432.718	1215.94	1146.67			104	35.726	69.271		104	0.624769	0.833734
		105	465.087	428.634	1193.86	1115.95			105	36.453	77.902		105	0.632803	0.890065
		106	466.555	426.995	1180.63	1119.3			106	39.56	61.339		106	0.667138	0.781964
		107	451.814	421.792	1165.22	1139.84			107	30.022	25.384		107	0.561735	0.547299
		108	452.494	431.373	1187.13	1144.17			108	21.121	42.96		108	0.463372	0.662011
		109	450.231	435.741	1113.65	1110.74			109	14.49	2.902		109	0.390094	0.400567
		110	425.099	424.529	1053.47	1038.55			110	0.57	14.913		110	0.236267	0.478958
		111	408.963	417.734	1018.43	1046.96			111	-8.771	-28.538		111	0.133041	0.195369
		112	404.243	418.984	992.309	1050.78			112	-14.741	-58.472		112	0.0670674	0
		113	396.886	417.696	987.591	1032.25			113	-20.81	-44.659		113	0	0.0901526

## Sheet: endosome10
endosome #10									background-adjusted				normalised
		frame #	Rab5(rim)	Rab5(background)	GalT(rim)	GalT(background)			frame #	Rab5	GalT		frame #	Rab5	GalT
		110	532.863	539.858	432.056	373.159			110	-6.995	58.897		110	0.254777	1
		111	534.992	537.625	433.573	380.074			111	-2.633	53.499		111	0.293541	0.893278
		112	549.661	543.665	435.968	379.364			112	5.996	56.604		112	0.370226	0.954666
		113	535.637	535.006	441.476	382.852			113	0.631	58.624		113	0.322548	0.994603
		114	522.895	539.409	433.645	383.205			114	-16.514	50.44		114	0.170183	0.8328
		115	507.935	522.062	439.911	383.568			115	-14.127	56.343		115	0.191396	0.949506
		116	497.073	523.102	443.016	384.256			116	-26.029	58.76		116	0.0856247	0.997291
		117	488.403	518.722	439.258	385.108			117	-30.319	54.15		117	0.0475001	0.906149
		118	486.742	517.568	440.129	383.068			118	-30.826	57.061		118	0.0429945	0.963701
		119	488.96	506.318	436.5	382.119			119	-17.358	54.381		119	0.162682	0.910716
		120	486.419	509.256	431.355	378.955			120	-22.837	52.4		120	0.113991	0.87155
		121	484.833	505.484	436.356	379.288			121	-20.651	57.068		121	0.133418	0.963839
		122	485.932	513.516	433.917	378.408			122	-27.584	55.509		122	0.0718056	0.933017
		123	484.167	503.723	431.394	380.696			123	-19.556	50.698		123	0.143149	0.8379
		124	488.339	498.375	393.419	380.278			124	-10.036	13.141		124	0.227752	0.0953737
		125	470.707	494.477	375.526	367.209			125	-23.77	8.317		125	0.1057	0
		126	463.819	499.483	393.983	375.151			126	-35.664	18.832		126	0	0.207888
		127	469.548	496.403	411.105	378.216			127	-26.855	32.889		127	0.0782841	0.485805
		128	480.438	500.111	412.953	375.633			128	-19.673	37.32		128	0.142109	0.573408
		129	467.863	490.83	414.79	377.534			129	-22.967	37.256		129	0.112836	0.572143
		130	461.056	488.574	413.927	374.21			130	-27.518	39.717		130	0.0723922	0.620799
		131	464.226	486.267	412.185	372.642			131	-22.041	39.543		131	0.121065	0.617359
		132	458.54	484	410.548	372.642			132	-25.46	37.906		132	0.0906813	0.584994
		133	468.556	495.5	403.266	376.966			133	-26.944	26.3		133	0.0774932	0.355536
		134	479.323	493.915	410.685	374.165			134	-14.592	36.52		134	0.187263	0.557592
		135	560.279	497.385	404.088	366.073			135	62.894	38.015		135	0.875869	0.587149
		136	575.831	498.969	404.75	361.719			136	76.862	43.031		136	1	0.686319
		137	551.507	487.589	390.463	355.5			137	63.918	34.963		137	0.884969	0.526809
		138	527.015	482.37	381.765	353.401			138	44.645	28.364		138	0.713693	0.396342
		139	535.257	478.906	378.235	355.099			139	56.351	23.136		139	0.817722	0.292981
		140	561.044	490.781	384.169	354.297			140	70.263	29.872		140	0.941356	0.426157
		141	542.721	485.333	372.625	356.255			141	57.388	16.37		141	0.826938	0.159213
		142	519.055	486.294	377.109	354.256			142	32.761	22.853		142	0.608082	0.287386
		143	555.848	500.245	378.159	358.505			143	55.603	19.654		143	0.811075	0.22414
		144	537.424	490.489	384.902	355.826			144	46.935	29.076		144	0.734044	0.410419
		145	545.121	481.271	381.78	354.048			145	63.85	27.732		145	0.884365	0.383847
		146	518.341	475.255	382.826	350.133			146	43.086	32.693		146	0.699838	0.48193
		147	524.614	478.424	379.545	348.179			147	46.19	31.366		147	0.727423	0.455694
		148	501.735	474.418	374.159	350.429			148	27.317	23.73		148	0.559702	0.304725
		149	490.917	471.348	377.727	351.967			149	19.569	25.76		149	0.490847	0.34486

[truncated: 9 more sheets: endosome11, endosome12, endosome13, endosome14, endosome15, endosome16, endosome17, aligned, time]
