# Supplementary material for: A novel live-cell imaging assay reveals regulation of endosome maturation
Source: eLife. 2021 Nov 30;10:e70982. doi: 10.7554/eLife.70982 (PMC8635980; doi:10.7554/eLife.70982)
Supplement: Figure 10—figure supplement 1—source data 1. [file elife-70982-fig10-figsupp1-data1.xlsx]

## Sheet: YFPCFPratio
YFP/CFP ratio
	pH 4.04	pH 4.39	pH 4.90	pH 5.40	pH 5.83	pH 6.38	pH 6.93	pH 7.30	pH 7.45	pH 7.87	pH 8.36	pH 8.71
	0.0142587	0.006949	0.0549475	0.120375	0.289711	0.668713	0.875399	1.36512	1.62377	1.44435	1.8293	1.66151
	0.0130211	0.0165361	0.0553856	0.128299	0.270035	0.665624	0.917783	1.33773	1.70556	1.4628	1.88695	1.76775
	0.01672	0.0078644	0.0535073	0.115288	0.281147	0.653174	0.886976	1.4381	1.54743	1.80005	1.83218	1.58157
	0.0176599	0.0093225	0.0519189	0.118131	0.300103	0.4103	0.871283	1.33541	1.71047	1.61962	1.70812	1.69482
	0.0142175	0.0101861	0.0493565	0.122743	0.287953	0.536065	1.10649	1.29898	1.92178	1.6118	1.89545	1.35231
	0.0117126	0.0073347	0.0518839	0.122024	0.277311	0.453369	1.04468	1.27715	1.57371	1.47011	1.78	1.79133
	0.0076777	0.0082995	0.0529267	0.129135	0.255594	0.695412	1.16427	1.52512	1.58863	1.7052	1.73768	1.76846
	0.0038643	0.0085323	0.0541574	0.137841	0.216107	0.73015	1.14908	1.44377	1.63996	1.80316	1.85885	1.65756
	0.0058883	0.0092532	0.0639848	0.133057	0.224009	0.621677	1.12145	1.36437	1.16129	2.11176	1.87898	1.59491
	0.0038515	0.0094134	0.0571804	0.116202	0.216161	0.587719	1.0961	1.66051	1.21587	1.62092	1.98966	1.68829
	0.0060287	0.0045693	0.0516015	0.123935	0.247375	0.713851	1.1709	1.6765	1.13185	1.62386	1.72376	1.88319
	0.0053039	0.0043442	0.0514681	0.124552	0.242637	0.628631	1.21138	1.53453	1.36789	1.55584	1.97623	1.79106
	0.0026454	0.0057845	0.0567492	0.118001	0.278455	0.562979	1.01493	1.60724	1.09885	1.55584	1.97042	1.88314
	0.0019718	0.0036145	0.052477	0.13262	0.282597	0.523096	1.27013	1.53532	1.18551	1.50061	1.8968	1.88489
	0.0058562	0.0050188	0.0545805	0.131228	0.276818	0.618268	1.12021	1.23638	1.54766	1.70162	1.92967	1.59733
	0.008094	0.0066958	0.0510044	0.121334	0.245847	0.685142	1.19156	1.21575	1.56542	1.72289	1.84235	1.72599
	0.0045234	0.003317	0.0536714	0.141286	0.322386	0.689952	1.26085	1.05841	1.38681	1.79977	2.01543	1.63226
	0.0029332	0.0062093	0.0483107	0.126176	0.281195	0.791375	1.12702	0.971497	1.41218	1.72682	1.82835	1.6778
	0.0038648	0.005455	0.0522844	0.136179	0.300198	0.631908	1.23558	1.4705	1.43345	1.84762	1.6335	2.11635
	0.00377	0.0053565	0.0512005	0.128998	0.230561	0.719185	1.1273	1.44009	1.67957	1.74308	2.48713	2.15656
	0.0036216	0.006456	0.0224379	0.133116	0.26099	0.706623	0.975049	1.45931	1.61596	1.7511	2.40815	2.0236
	0.0095061	0.0142506	0.0237737	0.128227	0.276288	0.579864	1.04396	1.58961	1.78667	1.82355	2.24644	2.33107
	0.0093364	0.010294	0.0277697	0.140223	0.275965	0.752557	1.20034	1.56453	1.73101	1.6879	2.09035	2.46614
	0.0046472	0.0123627	0.0275002	0.13853	0.228101	0.711297	1.36628	1.6084	1.55802	1.89143	2.22523	1.84518
	0.003132	0.009488	0.0513608	0.133116	0.245679	0.682066	1.30375	1.32449	1.56192	2.06667	2.00515	1.92458
	0.0030668	0.0098467	0.0431381	0.128229	0.234422	0.566237	1.19665	1.23921	1.44748	1.65702	2.13384	1.67098
	0.0057283	0.0089487	0.0368591	0.142479	0.276916	0.556599	1.38722	1.22146	1.56944	1.84743	2.15091	1.65608
	0.0090175	0.0116875	0.0445639	0.149611	0.268545	0.479784	1.21736	1.21735	1.57454	1.8155	2.17448	1.67003
	0.0061795	0.0109793	0.0545867	0.134262	0.275991	0.526472	1.3171	1.33857	1.7041	1.69108	2.15312	1.71883
	0.0046787	0.0071975	0.0359275	0.108252	0.282279	0.605001	1.237	1.50196	1.4799	1.6661	2.03027	1.71609
	0.0039565	0.0093004	0.0359106	0.115935	0.28153	0.768427	1.16957	1.43256	1.45026	2.03346	2.07004
	0.0047842	0.0103848	0.0403523	0.117738	0.280584	0.537049	1.15553	1.48365	1.60632	1.77209	1.88616
	0.0052033	0.0121081	0.0432152	0.108754	0.309586	0.502987		1.3749	1.40306	1.73412	1.65179	1.8842
	0.011083	0.0120678	0.0431884	0.113938	0.30065	0.68348		1.44036	1.45757	1.75888		2.18492
	0.0045653	0.012208	0.0397855	0.128783	0.303094	0.575466		1.38021	1.63475	1.7908	1.59391	2.41851
	0.0038806	0.0127119	0.0525025	0.134482	0.315004	0.73841		1.29815	1.71157	1.68237		2.31101
	0.0032301	0.0140799	0.0448533	0.110345		0.6877		1.4242	1.69505	1.82782	1.9465	2.098
	0.0024941	0.0067099	0.0491682	0.109716		0.700895		1.50654	1.66064	1.09983	1.86702	2.15289
	0.0056041	0.0070671	0.0484792	0.0996777		0.57694		1.74486	1.39466	1.87651	1.58971	2.15493
	0.0045207	0.0054746	0.0450781	0.112614		0.672799		1.17322	1.3508	1.54676		1.68137
	0.0084116	0.0082978	0.0439989	0.126737		0.728877		1.63155	1.41947	2.22301	1.79029
	0.0084684	0.0070205	0.0450612	0.11034		0.657753		0.94979	1.27067	1.82875	1.66679	1.99543
	0.0044325	0.006847	0.0486657	0.118454		0.603446		1.48891	1.39524	1.75647	2.14419
	0.0058012	0.0100516	0.0453752	0.119908		0.557499		1.71047	1.37996	1.99035	1.76889
	0.0056308	0.010136	0.0451135	0.12393		0.603381		1.50078		1.89429	1.68388
	0.0062506	0.0021839	0.0430757	0.124312		0.611002		1.41202		1.65907
	0.0074427	0.0017821	0.0455398	0.112936		0.75995				1.69976	1.88123
	0.0016311	0.0036837	0.0558367	0.113757		0.723242				1.35798	1.65939
	0.0027817	0.0025897	0.0568779	0.112143		0.803366				0.932179
	0.0047663	0.0039789	0.0522238	0.120627		0.877929				1.53388
	0.0058555	0.001662	0.0518505	0.120085		0.738957
	0.0100598	0.0032775	0.0555196	0.125307
	0.0101038	0.0022435	0.0383723	0.122248
	0.0094455		0.0352121	0.139573
	0.0103079		0.0347101	0.126382
	0.0067009		0.035309	0.131871
	0.0030075		0.0371729	0.126881
	0.0021837		0.0356043	0.139195
	0.0062155		0.0341501	0.114956
	0.0090754		0.0381179	0.116522
	0.0037767		0.0495719	0.116738
	0.0025437		0.0493903	0.13024
	0.0024246			0.148502
	0.0027937
	0.0209819

## Sheet: sigmoidal curve
	Interpolation of pH calibration curve (calculated using GraphPad Prism)
		YFP/CFP ratio
	Sigmoidal, 4PL, X is log(concentration)
	Best-fit values
	Top	1.959
	Bottom	-0.01616
	LogIC50	6.767
	HillSlope	0.7955
	IC50	5853765
	Span	1.976
	95% CI (asymptotic)
	Top	1.916 to 2.003
	Bottom	-0.04116 to 0.008846
	LogIC50	6.725 to 6.810
	HillSlope	0.7401 to 0.8510
	IC50	5310504 to 6452601
	Span	1.919 to 2.033
	Goodness of Fit
	Degrees of Freedom	581
	R squared	0.9675
	Adjusted R squared	0.9673
	Sum of Squares	11.18
	Replicates test for lack of fit
	SD replicates	0.1378
	SD lack of fit	0.1944
	Discrepancy (F)	1.992
	P value	0.0454
	Evidence of inadequate model?	Yes
	Number of points
	# of X values	780
	# Y values analyzed	585
