# Supplementary material for: A novel live-cell imaging assay reveals regulation of endosome maturation
Source: eLife. 2021 Nov 30;10:e70982. doi: 10.7554/eLife.70982 (PMC8635980; doi:10.7554/eLife.70982)
Supplement: Figure 10—source data 1. [file elife-70982-fig10-data1.xlsx]

## Sheet: pH vs YFPCFP ratio
		FOV	cell	YFP	CFP	ratio			average		104.576	104.005
	pH7.0	1	1	158.308	165.038	0.880379
				146.129	148.903	0.925502			background		YFP	CFP
				151.667	156.741	0.892961				pH4.5	104.129	103.052
				131.516	134.581	0.881089					103.88	103.885
			2	406.459	376.351	1.10845					103.565	103.831
				258	250.413	1.04792					104.009	104.451
		2	1	371.098	332.412	1.16687					104.809	103.752
				307.986	280.521	1.15236					104.023	104.553
				197.77	186.615	1.12812					103.723	103.853
		3	1	410.654	382.769	1.09798					104.604	103.917
				373.254	332.955	1.17352					105.375	104.382
				374.909	326.636	1.21427					106.005	105.015
				489.8	483.123	1.01611					104.522	103.363
		4	1	302.878	259.581	1.27463					103.577	102.914
				336.412	310.471	1.12288					103.365	102.954
				380.8	335.3	1.19425					103.86	103.418
				416.569	350.903	1.26365					104.833	104.451
				270.565	250.793	1.13081					104.605	104.273
				366.038	315.077	1.23873				pH7.3	104.689	103.952
			2	165.491	157.547	1.13771					104.777	104.223
				162.383	162.877	0.981913					105.366	105.452
				243.198	236.337	1.04753				pH8.5	104.249	104.274
			3	274.981	245.444	1.2048					105.214	105.18
				328.776	267.517	1.37115					104.292	105.64
				240.516	207.71	1.31084					105.132	103.483
				404.649	354.243	1.19915					105.132	103.483
				400.156	316.489	1.39107				pH9.0	104.783	103.514
				291.558	257.07	1.22159					104.742	102.149
				295.379	248.303	1.32229					105.185	104.686
				282.421	247.237	1.24166					104.573	105.006
			4	348.562	312.104	1.17245					105.336	103.522
				373.8	336.486	1.15805					104.92	103.521
	pH6.5	1	1	141.149	158.553	0.670477
				195.882	241.039	0.666303
			2	266.426	351.672	0.653499
				123.774	151.194	0.406836
			3	133.735	158.469	0.535385
				151.64	208.08	0.452214
				213.382	260.291	0.696199
				266.029	324.912	0.730865
				328.533	464.173	0.621813
				227.341	312.864	0.58779
				289.949	363.487	0.714397
				239.25	318.15	0.628892
				165.18	211.672	0.562885
		2	1	120.058	133.698	0.521409
				148.438	174.875	0.61891
		3	1	191	229.981	0.686037
				248.558	312.519	0.690516
				199.864	224.136	0.793202
		4	2	161.848	194.545	0.632562
				199.848	236.273	0.720296
				138.315	151.562	0.709447
				143.654	171.385	0.579967
			1	292.961	354.092	0.753279
				204.933	244.9	0.712283
				249.28	316	0.682583
				184.25	244.725	0.566189
			2	113.544	120.147	0.555581
				107.287	109.851	0.463767
				109.31	113.086	0.521328
			3	116.895	124.314	0.606587
		5	1	189.426	214.17	0.77021
		6	1	180.225	244.933	0.536793
				154.52	203.44	0.50228
			2	166.859	194.969	0.684701
			3	144.743	173.8	0.575502
				139.567	151.167	0.741936
		7	1	164.944	191.62	0.689016
				189.833	225.462	0.701954
				140.192	165.731	0.577005
				175.935	209.919	0.673746
				162.875	183.775	0.730841
				155.037	180.593	0.658865
				145.601	171.939	0.603898
			2	144.194	175.097	0.55728
				144.651	170.372	0.603842
				160.5	195.471	0.61142
		8	1	377.363	462.712	0.760474
			2	250.296	305.278	0.723993
				182.28	200.44	0.805767
				183.385	193.423	0.881357
				186.676	214.882	0.740462
	pH6.0	1	1	204.519	449.963	0.288888
				171.628	353.442	0.268814
				146.35	253.633	0.279187
				196.841	412.364	0.299214
				160.298	298.511	0.286481
			2	170.208	341.75	0.276061
				165.147	342.235	0.254255
				138.25	261.486	0.21383
				149.774	307.34	0.222284
				149.857	315.143	0.214463
				174.692	388.769	0.246226
		2	1	169.098	371.294	0.241395
				212.511	492.689	0.277694
				207.242	468.333	0.281796
		3	1	177.414	368.207	0.275691
				150.472	292.028	0.244099
				232.471	501.5	0.321753
				181.098	377.18	0.280121
				144.192	236.885	0.298135
			2	160.044	346.077	0.229139
				163.827	332.231	0.259616
		4	1	148.273	263.242	0.274416
				164.933	323.8	0.274607
				127.296	205.13	0.224674
			2	151.76	297.4	0.243978
				171.804	392.239	0.233242
				209.159	482.75	0.276131
				188.385	417.231	0.267568
				198	443.591	0.275112
				174.412	352.441	0.281103
				194.5	424.458	0.280616
			3	143.268	242.951	0.278469
		5	1	135.197	203.77	0.306933
				159.921	289	0.299171
				139.485	220.076	0.300757
				136.08	204.84	0.312433
	pH5.5	1	1	113.592	182.684	0.114595
			2	137.067	360.733	0.126559
				117.194	217.444	0.111233
				131.118	332.559	0.116131
				123.6	262.683	0.119892
				130.27	318.286	0.119909
				137.615	363.308	0.127415
				152.513	454.949	0.136595
				144.133	404.622	0.131587
				138.677	401.419	0.114659
				137.016	369.397	0.122235
				133.097	336.613	0.122615
		2	1	150.227	494.75	0.116831
				151.231	459.139	0.131373
				147	430.673	0.129869
			2	127.733	298.6	0.119002
				142.278	373.926	0.139679
			3	144.759	426.034	0.124781
				158.88	506	0.135087
				143.2	406.88	0.127525
		3	1	134.65	333.25	0.131188
				126.074	275.148	0.125615
				133.714	314.905	0.138161
				137.091	341.873	0.136694
				134.65	333.25	0.131188
		4	1	132.017	321.492	0.126174
				164	524.115	0.141449
				131.652	287.826	0.147297
				133.333	321.476	0.132235
		5	1	161.881	637.687	0.107377
				188.102	828.424	0.115301
				150.939	501.673	0.116588
			2	139.518	429.591	0.107321
				134.6	371.567	0.112214
				142.195	399.585	0.127272
			3	144.902	407.146	0.133028
		6	1	172.824	726.718	0.109598
				153.824	557.118	0.108689
				142.262	486.857	0.0984354
			2	165.513	649.231	0.111765
				172.51	643.569	0.125906
		7	1	133.415	369.585	0.108589
				138.707	396	0.11689
				142.978	428.065	0.118503
				127.838	295.351	0.121571
				129.786	310.429	0.122128
				131.5	346.5	0.11103
				125.925	295.736	0.11135
				121.648	260.37	0.109182
				139.294	395.588	0.119068
				140.159	404.111	0.118569
				135.382	353.441	0.123503
				131.238	325.81	0.120206
			2	139.74	359.067	0.137865
				157.266	524.469	0.125314
				175.744	647.047	0.131055
				139.139	379.944	0.125257
				138.407	350.185	0.137425
			3	129.312	323.188	0.112856
				128.98	317.38	0.114372
				126.333	294.308	0.114329
				152.706	476.971	0.129047
				141.585	356.094	0.14681
	pH8.0	1	1	305.42	242.454	1.45067
			2	170.85	148.7	1.48281
			3	169.565	139.424	1.83487
				203.053	164.158	1.63711
				254.8	196.56	1.62308
			4	215.558	178.884	1.48215
				281	206.8	1.71627
				286.893	204.429	1.81547
		2	1	199.688	148.312	2.14666
			2	186.054	153.622	1.64214
				216.116	172.043	1.63938
				199.734	164.532	1.57216
				199.734	164.532	1.57216
		3	1	408.667	306.029	1.50522
			2	148.625	129.225	1.7466
				145.532	127.106	1.77292
		4	1	172.125	140.852	1.83323
			2	207.041	162.671	1.74658
				358.207	240.586	1.857
				343.645	240.484	1.75169
				381.9	261.7	1.75861
				351.2	238.56	1.83289
				285.481	210.519	1.69842
				176.336	141.244	1.92702
				238.075	167.875	2.09017
		5	1	263.727	199.394	1.66844
				488.894	311.34	1.85361
				456.68	297.26	1.82197
			2	483.212	327.242	1.69612
		6	1	164.991	139.607	1.69696
				160.038	130.558	2.08873
				208.13	161.761	1.79296
				201.111	159	1.75534
		7	1	581	374.196	1.76329
				556.984	355.951	1.79566
			2	537.638	360.755	1.68671
				400.783	265.37	1.83563
				215.442	204.327	1.1051
			3	532.933	331.58	1.88227
				400.902	294.951	1.55188
		8	1	359.028	217.722	2.23759
				407.286	268.843	1.83641
				444.87	297.065	1.76263
			2	414.905	259.206	1.99953
				756.913	447.674	1.89816
				540.101	365.859	1.66324
		9	1	430.41	295.033	1.70569
				300.263	247.526	1.36347
				158.333	161.286	0.938482
			2	503.833	363.667	1.5376
	pH7.5	1	1	434.6	306.6	1.62898
				518.955	346.295	1.71026
				324.439	245.455	1.55435
		2	1	334.648	237.845	1.71901
				532.973	326.216	1.92788
				301.077	228.231	1.5818
		3	1	504.576	355.152	1.59269
				598.791	404.709	1.64353
				359.833	323.3	1.16399
			2	338.63	295.973	1.21924
				282.615	260.808	1.13543
				435.029	345	1.3712
				244.012	230.417	1.10303
		4	1	191.613	176.903	1.19396
				559.443	397.278	1.551
				524.256	371.462	1.56915
				531.9	411.55	1.38947
				414.186	322.651	1.41603
		5	1	414.605	319.684	1.43746
				602.893	400.036	1.68333
			2	327.565	241.348	1.62359
				335.034	232.31	1.79617
		6	1	729.329	464.25	1.73425
				695	482.327	1.56064
				615.158	430.263	1.56496
			2	665.846	491.154	1.44975
			3	510.8	362.2	1.57332
				643.28	445.5	1.57749
				743.395	478.209	1.70714
				406.837	307.633	1.48438
				438.302	333.512	1.4541
		7	1	260.309	200.309	1.6171
				276.204	225.735	1.40991
			2	343.406	267.25	1.46302
				352.231	254.846	1.64183
				281	206.414	1.72274
		8	1	331.256	237.07	1.70353
				328.931	238.448	1.66878
			2	135.165	125.346	1.43335
				157.404	142.535	1.37109
				201.621	171.773	1.43202
				164.667	150.744	1.28567
				183.812	160.203	1.40995
				152.409	138.08	1.40376
	pH5.0	1	1	114.156	287.831	0.0521156
				118.716	368.701	0.0534205
				113.487	280.303	0.0505462
				116.04	334.9	0.0496511
				115.048	326.841	0.0469951
				116.359	341.205	0.0496762
			2	113.985	291.657	0.0501417
				110.871	229.871	0.0500151
				114.636	269.227	0.060889
				113.846	275.192	0.0541525
		2	1	119.115	395.918	0.0498066
				121.341	439.927	0.049908
				120.526	394.211	0.0549616
				125.103	505.138	0.051173
				121.75	428.208	0.0529736
				115.317	324.883	0.0486296
				115.722	321.403	0.0512709
				117.111	374.389	0.0463607
				123.405	474.143	0.0508708
				118.16	379.56	0.0492976
			2	109.857	364.032	0.0203102
				109.525	335.4	0.0213885
			3	115.394	513.303	0.0264311
				118.115	616.269	0.0264301
		3	1	121.596	445.596	0.0498262
				118.821	446.571	0.0415838
				116.377	438.792	0.0352499
				114.632	341.579	0.0423287
				128.433	550.6	0.0534202
			2	135.5	979.766	0.0353112
				115.476	422.571	0.0342165
				133.667	838.2	0.0396233
		4	1	109.486	229.946	0.0389881
				112.286	294.857	0.0403988
				109.816	249.184	0.0360947
				111	236.327	0.0485497
			2	119.015	437.758	0.0432631
				121.574	460.426	0.0476913
				123.7	509.36	0.0471789
			3	116.661	383.868	0.0431826
				115.552	365.552	0.0419664
				113.962	324.077	0.0426506
				114.707	323.011	0.0462599
				130	676	0.0444483
				117.413	400.317	0.0433232
				116.244	387.244	0.0411956
				119.944	453.111	0.0440216
		5	1	142.867	799.084	0.055089
				127.815	521.704	0.0556362
				125.462	513.962	0.0509473
				123.17	472.717	0.0504301
				132.962	624.654	0.0545208
		6	1	121.109	548.869	0.0371646
				117.5	486.391	0.0337988
				115.361	430.311	0.0330524
				119.873	552.545	0.0341044
				120.395	544.047	0.0359493
				120.333	561.737	0.0344245
				121.344	610.875	0.0330819
				121.278	556.278	0.0369295
		7	1	116.923	363.692	0.0475465
				118.136	389.21	0.0475454
	pH4.5	1	1	105.708	348.792	0.00462524
				106.85	275.35	0.0132726
				106.8	459.033	0.00626486
				106.5	371.167	0.00720237
				105.121	213.052	0.00499968
			2	105.6	321.14	0.00471688
		2	1	108.14	601.825	0.00715962
				106.625	410.656	0.00668251
				107.882	522.529	0.00789967
				108.044	532.6	0.00809202
			2	106.212	587.096	0.00338694
				105.31	404.552	0.00244288
				106.049	457.22	0.00417083
				105.379	484.515	0.00211085
		3	1	105.733	448.3	0.00336107
				106.45	468.9	0.00513627
				105.222	471.407	0.00175884
				106.292	472.125	0.00466207
			2	106.086	485.4	0.00395967
				106.333	538.545	0.00404382
		4	1	104.743	218.086	0.00146562
				105.393	200.75	0.00844695
				106.521	347.901	0.00797553
				106.111	273.756	0.00904383
				106.12	326.44	0.00694225
				106.912	398.735	0.00792658
			2	106.929	430.31	0.00721166
				107.683	418.122	0.00989185
				108.025	469.6	0.00943448
			3	106.02	383.653	0.00516435
				107.923	524.808	0.00795432
		5	1	111.151	791.604	0.00956255
				108.312	459.125	0.0105209
			2	106.907	343.889	0.00971803
			3	108.295	454.818	0.0106017
				108.1	425.533	0.0109608
				109.966	526.724	0.0127513
		6	1	107.634	644.585	0.00565726
				108.4	725.6	0.00615224
				107.892	813.919	0.00467127
			2	107.735	553.118	0.00703431
				106.667	482.889	0.00551937
			3	106.794	511.059	0.0054494
				108.261	526.913	0.00871395
				108.04	501.58	0.00871332
		7	1	105	560.9	0.000928441
				104.862	586.69	0.000592933
				105.087	398.087	0.00173829
				104.897	449.368	0.000930036
				105.857	569.714	0.00275107
				105.023	718.512	0.000727738
				105.067	428.55	0.0015135
				104.769	445.769	0.000565302
	pH9.0	1	1	337.442	243.5	1.66935
				301.909	214.955	1.77858
				328.226	244.774	1.58877
			2	395.565	275.033	1.70141
				188.717	165.646	1.36502
				204.424	159.061	1.81357
				370.595	253.75	1.77648
				346.732	249.439	1.66506
				423.46	303.3	1.60006
				174.064	144.5	1.71597
			3	476.5	300.803	1.88988
				451.922	297.255	1.79739
				420.394	271.014	1.89102
				368.13	243.13	1.89437
			4	285.203	216.441	1.60649
				293.968	213.063	1.73662
		2	1	323.754	237.632	1.64022
				448.851	308.537	1.68323
			2	525.121	301.985	2.12418
				501.167	287.167	2.16525
				431.167	264.676	2.03267
				266.259	172.607	2.35683
				235.741	156.42	2.50243
		3	1	178.833	143.556	1.8775
				180.346	142.669	1.95971
				227.87	177.13	1.68607
				180.938	149.458	1.68002
				209.1	165.933	1.68783
		4	1	172.277	142.723	1.74857
				276.067	203.267	1.72766
		5	1	191.035	149.192	1.91336
				307.589	196.179	2.2025
				353.419	206.129	2.43668
				414.6	237.4	2.32411
			2	317.746	204.881	2.11319
				382.565	232.391	2.16526
				308.529	197.912	2.17186
			3	184.023	150.594	1.70528
			4	130.176	116.118	2.11344
	pH8.5	1	1	159.856	133.534	1.87206
				192	149.636	1.91589
				268.438	192.75	1.84644
				183.535	149.563	1.73316
				385.36	251.44	1.90446
				245.955	182.75	1.7954
				210.584	164.337	1.75708
				250.44	181.78	1.87546
				312.943	214.2	1.89089
				351.918	227.603	2.00118
				197.34	157.149	1.74552
				436.6	271.3	1.98466
				315.359	210.266	1.98364
				269.257	190.124	1.91225
				272.819	190.486	1.94543
				235.072	174.144	1.86054
				330	215.135	2.02847
				180.449	144.813	1.85927
		2	1	180.152	149.619	1.65686
		3	1	232.025	154.475	2.52525
				351.204	205.653	2.4263
				217.571	153.556	2.28038
				283.074	188.667	2.10836
				377.982	226.125	2.23883
				253.923	177.769	2.02466
				651.706	359.676	2.13998
				574.333	321.667	2.1582
				522.821	295.607	2.18288
			2	492.571	283.469	2.16197
				590.25	342.5	2.03641
				590.046	337.8	2.07648
				474.545	299.455	1.89291
				196.5	159	1.6715
		4	1	209.16	168.976	1.60971
		5	1	295.703	201.486	1.96066
				338.718	228.718	1.87745
				197.852	162.037	1.60732
		6	1	197.256	155.09	1.81423
				209.878	166.522	1.68438
				218.5	156.4	2.17433
			2	385	261.857	1.7765
				201.259	160.759	1.70355
				116.294	127.607	0.496491
			3	255.894	183.742	1.89772
		7	1	183.435	150.87	1.68269
	pH7.3	1	1	159.97	144	1.38503
			2	166.535	149.747	1.35454
			3	147.711	133.395	1.46768
				239.579	204.526	1.34303
			4	256.696	220.551	1.30524
				197.784	176.432	1.28693
			5	436.512	321.024	1.52953
		2	1	315.649	249.595	1.44978
				457.586	362.157	1.36745
			2	329.479	238.789	1.66862
		3	1	667.885	439.346	1.67981
				470.25	341.672	1.5386
				239.439	187.268	1.61972
				310.074	237.222	1.54258
			2	274.25	240.7	1.24126
				212.734	192.438	1.22305
			3	291.405	280.063	1.06118
				315.081	320.274	0.973349
		4	1	357.718	275.538	1.47576
				292.585	233.954	1.44679
				361.35	279.35	1.46439
			2	211.265	170.479	1.60498
				366.27	270.635	1.57051
				419.875	299.391	1.61372
		5	1	404.946	330.216	1.32783
			2	160.492	148.587	1.25423
				286.012	252.012	1.22586
				238.423	213.423	1.22326
				218.1	188.24	1.34771
				428.469	319.031	1.5063
			3	314.094	249.656	1.43849
				407.586	307.621	1.48815
		6	1	254.886	212.743	1.38231
				341.879	268.152	1.44567
				235.81	198.5	1.38879
				272.976	233.167	1.30379
		7	1	428.946	331.161	1.42796
				481.104	353.312	1.5103
				465.767	310.333	1.75057
				161.395	151.921	1.18581
				242.78	188.06	1.64421
		8	1	183.979	187.207	0.954342
				827.297	588.791	1.4908
				583.275	383.2	1.71457
				223.939	182.918	1.51259
				400.486	312.973	1.41605
	pH4.0	1	1	104.912	166.961	0.00534023
				105.464	215.433	0.00797106
				105.119	169.926	0.00824016
				105.477	186.636	0.0109063
				104.938	168.975	0.00557488
				105.158	201.868	0.00594913
			2	105.411	286.778	0.0045696
				104.739	294.239	0.000857891
				105.64	381.52	0.00383475
			3	104.75	297.727	0.000899227
				104.9	252.286	0.00218639
				105.453	376.947	0.00321387
			4	104.579	321.868	1.46881e-05
				104.41	310.934	-0.000801241
				105.178	304.156	0.00300873
		2	1	105.412	277.45	0.00482112
				104.925	307.491	0.00171609
				104.458	259.146	-0.000759309
				104.944	347.259	0.00151364
				104.716	292.919	0.000742137
				104.571	260.667	-3.06392e-05
			2	105.353	245.329	0.00549942
				105.4	252.95	0.00553358
			3	105.033	325.283	0.00206618
				104.911	393.867	0.00115641
				104.528	275.167	-0.000279268
		3	1	105.525	369.22	0.00357898
		4	1	105.546	274.445	0.00569232
				105.522	349.3	0.0038574
				105.643	454.167	0.00304773
				105.333	439.917	0.00225416
				105.812	481.75	0.00327258
			2	105.011	297.3	0.00225148
				105.819	267.125	0.00762138
		5	1	105.623	458.509	0.00295399
				105.547	501.651	0.00244237
				105.516	572.339	0.00200754
				105.833	837.944	0.00171295
				106.269	507.885	0.00419233
			2	105.284	387.025	0.0025023
				106.118	354.794	0.00614939
		6	1	104.822	200.067	0.00256293
			2	105.467	433.967	0.00270092
				105.579	375.184	0.0036994
				106.023	462.273	0.00403943
				106.629	523.6	0.00489329
				106.352	419.014	0.00563857
		7	1	104.275	271.596	-0.00179485
				104.469	271.604	-0.000637235
			2	104.795	269.795	0.00132215
			3	104.967	268.143	0.00238336
			4	105.028	205.189	0.00446908
				105.176	219.392	0.00520162
				105.51	262.865	0.00588065
				105.351	234.065	0.00596032
				105.108	268.351	0.00323829
		8	1	105.386	563.842	0.00176193
			2	105.109	610.855	0.00105199
				105.567	355.111	0.00394734
			3	105.426	260.128	0.00544571
		9	1	104.906	342.891	0.00138225
				104.804	419.072	0.00072429
				104.683	384.695	0.000381916
			2	105.339	582.29	0.0015957
			3	104.865	144.226	0.00719027
