# Supplementary material for: A novel live-cell imaging assay reveals regulation of endosome maturation
Source: eLife. 2021 Nov 30;10:e70982. doi: 10.7554/eLife.70982 (PMC8635980; doi:10.7554/eLife.70982)
Supplement: Figure 10—source data 2. [file elife-70982-fig10-data2.xlsx]

## Sheet: Golgi
		Golgi from 7 FOVs
		YFP	CFP	ratio
		180.503	271.594	0.453771
		207.958	339.042	0.440422
		166.24	254.96	0.409581
		206.405	451.689	0.293686
		256.814	678.322	0.265615
		210	460.778	0.296273
		272.109	458.5	0.47288
		267.818	413	0.528445
		263.884	404.884	0.529621
		254.765	431.441	0.459032
		173.379	248.293	0.477511
		174.022	245.804	0.490336
		238.352	473.972	0.362162
		218.917	404.806	0.380764
		257.765	510.176	0.377638
		228.281	457.562	0.35052
		276.173	437.962	0.514008
		199.095	323.476	0.431317
		212.974	375	0.40064
		221.027	416.081	0.373791
		207.585	293.439	0.543927
		237.393	391.929	0.461681
		183.262	306.344	0.389793
		204.137	305.725	0.493955
		202.857	316.629	0.462751
		143.518	210.729	0.366828
		134.96	189.78	0.356764
		170.3	249.2	0.453488
		163.8	241.3	0.432393
		146.519	193.741	0.468575
		143.932	194.356	0.437103
		140.026	200.895	0.368007
		175.363	260.163	0.45407
		151.518	221.482	0.401057
		149.385	215.654	0.402871
		165.795	214.386	0.554782
		170.121	273.939	0.38681
		169.111	262.361	0.408575
		180.463	292.634	0.403214
		149.038	192.808	0.501492
		155.34	214.755	0.459398
		122.047	172.419	0.259972
		134.25	213.35	0.274128
		140.78	208.22	0.349553
		137.418	201.018	0.340937
		154	252.688	0.334028
		160.382	266.382	0.345093
		148.421	226.158	0.360683
		129.161	180.323	0.325401
		139.952	203.095	0.359179
		166.119	255.548	0.40721
		208.731	350.462	0.423221
		217.667	493.75	0.290894
		228.75	508.3	0.307797
		195.585	371.366	0.341269
		197.357	408.607	0.305481
		209.375	373.875	0.389017
		281.5	513.143	0.432776
		276.588	501.706	0.43287
		200.737	334.632	0.417632
		258.531	463.5	0.428657
		244.464	436.893	0.420686
		261.35	466.65	0.432696
		273.654	488.846	0.439694
		229.292	378.75	0.454368
		237.2	415.75	0.425899
		283.85	520.175	0.431114
		215.966	423.931	0.348879
		188.358	323.506	0.382566
		166.196	276.283	0.358927
		200.594	357.188	0.38001
		210.917	393.5	0.368045
		192.265	354.294	0.351242
		188.846	335.846	0.364387
		246.5	474.033	0.384063
		173.667	275.389	0.404127
		140.344	200.281	0.373598
		183.229	306.314	0.389688
		215.649	414.737	0.358151
		208.2	392.267	0.360221
		224.69	413.214	0.389054
		177.026	275.211	0.42405
		195.021	349.574	0.369143
		212.95	402.1	0.364259
		224.35	477.65	0.321233
		215.45	410.7	0.362203

## Sheet: lysosomes
		lysosomes from 5 FOVs
		YFP	CFP	ratio
		116.048	449.238	0.0347969
		113.083	531.417	0.0212013
		114.688	404.562	0.0354421
		112.125	368.312	0.0306243
		111.75	291.5	0.0411141
		111.846	463.308	0.0217758
		110.875	298.75	0.0351213
		113.312	389	0.0325594
		113.417	404.667	0.0312165
		109.375	494.75	0.0137205
		113.524	996.333	0.0106612
		116	679.111	0.0208293
		116.5	530.125	0.0292654
		116.778	550.222	0.0285719
		106.762	257.952	0.0178249
		107.062	245.75	0.0214501
		109.875	246.75	0.0408696
		110.75	262.083	0.0424307
		109.5	231.75	0.0427184
		111.25	274	0.0423977
		107.667	250.083	0.0249315
		107.438	245.875	0.024063
		108.333	217.167	0.0379532
		108.667	244.417	0.0330017
		109.125	216.688	0.0450795
		109	323.75	0.0226501
		113.095	306.476	0.0446981
		115	376.385	0.0402363
		114.188	383.188	0.0363613
		114.667	334.25	0.0461276
		114.111	278.556	0.0575942
		112.636	245.455	0.0606227
		120.583	316	0.0778545
		118.375	348.625	0.0585242
		110.182	292.273	0.0326618
		109.125	281.062	0.0287821
		109.125	215.75	0.0454545
		119.71	241.677	0.113285
		116.654	199.538	0.131078
		132.952	228.381	0.230912
		144.95	426.6	0.126545
		137	296.308	0.170712
		134.167	227	0.243282
		139.438	255.25	0.232762
		145.667	251.25	0.281059
		137.812	249.688	0.230503
		125.25	202.583	0.21339
		141.25	229.188	0.295194
		112.667	169.333	0.130659
		114.25	183.25	0.127726
		116.486	195.324	0.135241
		113.375	237.75	0.0695733
		111.333	216.714	0.0644863
		111.75	265.25	0.0477658
		115	268.812	0.0663402
		118.714	342.381	0.0614669
		119.333	334.333	0.0662811
		116.952	161.429	0.221671
		112.938	163.25	0.148349
		117.5	189.75	0.15562
		112.25	166.55	0.129819
		111	162.583	0.117483
		116.083	198.167	0.126966
		111.778	161.444	0.133085
		112.75	167.438	0.135789
		116.312	217.938	0.107119
		109.125	191.562	0.0578691
		109.238	218.857	0.0452109
		108.417	172.833	0.0632509
		109.238	154.286	0.102133
		108	153.812	0.0787216
		111	165.273	0.112408
		113.167	163.083	0.152572
		107.438	149.938	0.0732456
		108.833	137.667	0.139412
		107.938	137.312	0.11477
		107.667	142.048	0.0939101
		107.625	134.625	0.114625
		107.875	148.25	0.0856354
		111	175.923	0.0959917
		108.125	136.875	0.121771
		108.333	142.583	0.109466
		110.905	153.143	0.137706
		107.417	130.583	0.123881
		110.5	148.5	0.142857
		113.583	157.417	0.176103
		109.909	160.273	0.103173
		108	137.125	0.117216
		112	152.333	0.162163
		110	160.364	0.104595
		109.688	165.875	0.0904652
		112.889	153.111	0.177386
		109.667	149.333	0.12231
		107.556	133.222	0.117663
		108.25	143.65	0.104551
		109	146	0.116279
		109.625	170.625	0.0831793
		108.125	136.875	0.121771
		107	142.75	0.0754717
		106.5	135.25	0.0775194
		108.333	161.333	0.0742804
		112.923	207.423	0.0854505
		107.625	146.375	0.0835735
		106.5	131.25	0.0884956
		107.182	138.818	0.088838
		108.417	137.25	0.128964
		108.312	142.125	0.110211
		108.75	141.333	0.123914
		108.75	153	0.095
		108.583	145.917	0.106788
		109	138.25	0.141844
		110.5	177.5	0.0872483
		109.071	158.143	0.0919609

## Sheet: Enlarged endosomes
	enlarged endosomes from 10 FOVs
		YFP	CFP	ratio
		173.964	197.54	0.740047
		162.449	201.201	0.595198
		162.646	212.786	0.534185
		159.022	193.044	0.611057
		143.533	168.391	0.604563
		146.867	167.884	0.660671
		141.69	164.304	0.614805
		135.579	156.788	0.587101
		139.91	177.32	0.483181
		136.619	162.868	0.544849
		129.407	149.747	0.5435
		135.66	169.219	0.478111
		146.688	162.356	0.719186
		146.893	184.536	0.526062
		124.247	157.518	0.371382
		160.836	200.397	0.58355
		159.841	208.774	0.527927
		149.377	203.203	0.452851
		144.32	188.579	0.471144
		144.893	185.508	0.495625
		145.973	179.366	0.549629
		152.381	246.64	0.336821
		139.867	236.89	0.267884
		155.892	243.353	0.369725
		149.786	217.812	0.398791
		156.539	225.546	0.428729
		152.147	231.004	0.376137
		121.493	158.982	0.312475
		129.699	182.027	0.325193
		147.195	210.852	0.400503
		118.174	157.985	0.257779
		127.814	180.103	0.30886
		116.078	196.719	0.128875
		120.073	199.405	0.166724
		135.312	263.934	0.194564
		147.802	212.036	0.401721
		128.395	178.616	0.322617
		141.788	237.811	0.280304
		138.149	258.324	0.219857
		142.15	236.774	0.285182
		159.102	243.745	0.391502
		169.219	283.577	0.36117
		133.065	207.962	0.27691
		146.68	366.078	0.162233
		133.585	217.556	0.258258
		124.067	278.622	0.114262
		136.7	198.588	0.342093
		151.58	239.638	0.348219
		156.106	246.673	0.362671
		132.588	217.435	0.249819
		139.524	215.736	0.315108
		142.045	263.004	0.237775
		181.479	261.534	0.488722
		181.96	256.218	0.508818
		149.498	224.55	0.374315
		169.505	245.398	0.460013
		162.102	244.599	0.410328
		136.859	211.468	0.302937
		154.812	238.996	0.373629
		148.265	216.567	0.38977
		174.462	368	0.265894
		180.88	438.982	0.228822
		203.759	673.627	0.174823
		158.639	483.476	0.143607
		141.373	329.588	0.164938
		145.357	280.874	0.232507
		176.051	332.296	0.314227
		149.714	240.089	0.333462
		135.893	200.231	0.328013
		140.156	221.307	0.305612
		164.089	286.419	0.327605
		134.65	220.425	0.261018
		183.277	257.196	0.514131
		205.846	270.788	0.606992
		181.216	252.703	0.515795
		127.942	211.188	0.2213
		193.8	258.45	0.577678
		131.1	182.414	0.34125
		155.866	231.074	0.404969
		144.699	230.367	0.319541
		151.144	272.913	0.27746
		169.689	276.367	0.378901
		144.61	237.175	0.302664
