# Supplementary material for: A novel live-cell imaging assay reveals regulation of endosome maturation
Source: eLife. 2021 Nov 30;10:e70982. doi: 10.7554/eLife.70982 (PMC8635980; doi:10.7554/eLife.70982)
Supplement: Figure 11—source data 1. [file elife-70982-fig11-data1.xlsx]

## Sheet: exp1-background
		YFP	CFP
	background1	109.21	130.983
	background2	108.238	130.164
	background3	108.763	128.89

## Sheet: exp1-endosome1
endosome 1							dMFI		%dMFI				background-adjusted
	frame #	Rab5(rim)	Rab5(background)	YFP(lumen)	CFP(lumen)		Rab5		frame #	Rab5		frame #	YFP/CFP		YFP background	CFP background
	1	375.006	411.908	228.357	538.087		-36.902		1	0.19568		1	0.29493		108	130
	2	375.821	408.246	230.416	593.124		-32.425		2	0.243531		2	0.264327
	3	372.893	406.406	231.949	637.12		-33.513		3	0.231902		3	0.244417
	4	369.238	401.924	225.854	601.223		-32.686		4	0.240741		4	0.250102
	5	364.048	401.402	230.745	577.394		-37.354		5	0.190849		5	0.274355
	6	361.595	393.379	227.241	559.42		-31.784		6	0.250382		6	0.277679
	7	375.267	402.57	224.53	562.313		-27.303		7	0.298276		7	0.26955
	8	435.189	425.674	222.244	600.28		9.515		8	0.691795		8	0.242928
	9	453.572	427.508	218.796	582.838		26.064		9	0.868674		9	0.24467
	10	448.557	440.871	220.13	630.193		7.686		10	0.672246		10	0.224173
	11	480.005	441.654	222.33	550.702		38.351		11	1		11	0.27176
	12	442.702	427.123	219.664	558.811		15.579		12	0.756608		12	0.260404
	13	428.348	417.579	216.241	548.564		10.769		13	0.705198		13	0.258601
	14	399.097	389.388	207.155	588.962		9.709		14	0.693868		14	0.216042
	15	400.14	393.183	210.235	574.263		6.957		15	0.664454		15	0.230123
	16	401.378	394.393	203.461	562.454		6.985		16	0.664753		16	0.220743
	17	393.273	393.259	199.744	584.43		0.014		17	0.590246		17	0.201888
	18	403.202	406.335	204.781	590.193		-3.133		18	0.55661		18	0.210305
	19	360.673	403.915	190.821	592.777		-43.242		19	0.127917		19	0.178965
	20	385.608	408.647	191.905	598.161		-23.039		20	0.343851		20	0.179223
	21	366.403	399.784	182.136	550.551		-33.381		21	0.233313		21	0.176283
	22	344.591	375.526	180.566	500.43		-30.935		22	0.259456		22	0.195897
	23	338.903	380.293	182.421	493.987		-41.39		23	0.147711		23	0.204461
	24	345.29	383.401	183.772	499.022		-38.111		24	0.182758		24	0.205332
	25	356.199	395.28	183.829	520.472		-39.081		25	0.17239		25	0.194198
	26	355.17	390	186.924	532.88		-34.83		26	0.217826		26	0.1959
	27	351.33	388.539	187.684	542.949		-37.209		27	0.192399		27	0.192963
	28	354.318	385.233	184.117	530.861		-30.915		28	0.25967		28	0.189884
	29	351.96	394.737	182.332	534.278		-42.777		29	0.132887		29	0.183864
	30	346.267	385.085	177.137	545.505		-38.818		30	0.175201		30	0.166393
	31	348.484	383.05	176.195	516.645		-34.566		31	0.220647		31	0.176376
	32	358.092	391.808	178.997	526.355		-33.716		32	0.229732		32	0.179125
	33	360.467	385.7	180.011	538.436		-25.233		33	0.320401		33	0.176309
	34	343.119	372.547	176.905	524.478		-29.428		34	0.275564		34	0.174674
	35	347.988	383.955	179.406	541.075		-35.967		35	0.205673		35	0.173706
	36	366.915	401.276	181.743	553.092		-34.361		36	0.222839		36	0.174295
	37	351.994	385.924	180.324	550.082		-33.93		37	0.227445		37	0.172166
	38	356.739	380.211	179.844	542.502		-23.472		38	0.339223		38	0.174166
	39	349.994	388.438	184.102	563.412		-38.444		39	0.179199		39	0.175588
	40	356.506	385.851	185.303	548.407		-29.345		40	0.276451		40	0.184756
	41	341.21	370.871	186.133	542.339		-29.661		41	0.273073		41	0.189487
	42	340.642	371.315	182.639	528.731		-30.673		42	0.262257		42	0.187191
	43	349.045	379.552	186.37	548.177		-30.507		43	0.264031		43	0.187409
	44	357.892	391.418	189.731	558.415		-33.526		44	0.231763		44	0.190775
	45	348.449	377.254	188.718	568.203		-28.805		45	0.282222		45	0.184202
	46	346.244	382.97	187.342	559.538		-36.726		46	0.197561		46	0.184715
	47	341.335	375.737	186.636	543.171		-34.402		47	0.2224		47	0.190323
	48	351.869	390.336	185.538	551.734		-38.467		48	0.178953		48	0.183855
	49	354.722	391.366	197.373	593.041		-36.644		49	0.198437		49	0.193013
	50	358.466	394.603	193.032	606.725		-36.137		50	0.203856		50	0.178367
	51	366.841	396.444	203.101	601.123		-29.603		51	0.273693		51	0.20186
	52	367.381	393.905	193.424	573.459		-26.524		52	0.306602		52	0.192631
	53	360.125	383.871	194.329	583.826		-23.746		53	0.336294		53	0.190225
	54	358.597	381.392	192.367	584.294		-22.795		54	0.346458		54	0.18571
	55	357.295	386.89	194.01	606.763		-29.595		55	0.273779		55	0.180404
	56	364.449	391.114	187.623	601.707		-26.665		56	0.305095		56	0.168798
	57	337.555	374.405	187.102	583.895		-36.85		57	0.196236		57	0.174274
	58	329.519	368.368	189.538	600.827		-38.849		58	0.17487		58	0.17318
	59	325.303	376.451	183.923	570.091		-51.148		59	0.0434155		59	0.172517
	60	338.201	376.395	185.109	570.168		-38.194		60	0.181871		60	0.175181
	61	335.115	374.321	194.751	605.493		-39.206		61	0.171054		61	0.182444
	62	338.803	385.197	187.699	585.519		-46.394		62	0.0942273		62	0.174963
	63	338.059	382.404	191.125	598.454		-44.345		63	0.116127		63	0.177445
	64	331.48	371.048	189.898	562.241		-39.568		64	0.167185		64	0.189473
	65	325.526	379.343	185.442	553.981		-53.817		65	0.0148887		65	0.182654
	66	318.858	363.52	186.536	543.016		-44.662		66	0.112739		66	0.190152
	67	325.669	368.776	182.457	555.404		-43.107		67	0.129359		67	0.175027
	68	330.75	361.873	191.518	585.369		-31.123		68	0.257447		68	0.183407
	69	309.147	353.974	191.854	554.311		-44.827		69	0.110976		69	0.197624
	70	310.934	357.062	190.861	541.623		-46.128		70	0.0970704		70	0.201303
	71	314.838	365.479	189.868	554.192		-50.641		71	0.0488345		71	0.192998
	72	305.083	360.293	190.74	554.548		-55.21		72	0		72	0.19489
	73	319.414	366.158	194.602	558.741		-46.744		73	0.0904864		73	0.201991
	74	325.118	367.214	192.483	564.94		-42.096		74	0.140165		74	0.194241
	75	329.846	375.104	186.545	545.667		-45.258		75	0.106369		75	0.188961
	76	333.667	384.203	185.444	582.436		-50.536		76	0.0499567		76	0.171171
	77	334.579	363.932	182.605	548.785		-29.353		77	0.276365		77	0.178146
	78	327.066	369.591	181.671	548.06		-42.525		78	0.13558		78	0.176221
	79	338.541	382.81	198.62	623.464		-44.269		79	0.11694		79	0.183641
	80	319.541	362.375	185.13	572.24		-42.834		80	0.132277		80	0.174408
	81	326.797	363.925	185.312	555.865		-37.128		81	0.193264		81	0.181541
	82	319.028	366.34	187.26	568.22		-47.312		82	0.0844155		82	0.180868
	83	316.546	353.697	182.079	566.935		-37.151		83	0.193018		83	0.169542
	84	311.401	352.716	178.409	556.601		-41.315		84	0.148513		84	0.165046
	85	308.705	348.292	174.493	541.222		-39.587		85	0.166982		85	0.161696
	86	314.429	346.208	177.889	561.747		-31.779		86	0.250436		86	0.161875
	87	317.404	355.425	178.058	589.458		-38.021		87	0.18372		87	0.15248
	88	330.164	374.382	189.038	616.077		-44.218		88	0.117485		88	0.166718
	89	312.783	351.103	180.082	579.851		-38.32		89	0.180524		89	0.160235
	90	301.479	343.77	186.952	623.675		-42.291		90	0.138081		90	0.159927
	91	307.27	345.337	182.981	602.324		-38.067		91	0.183228		91	0.158749
	92	311.349	349.115	187.185	641.505		-37.766		92	0.186445		92	0.154808
	93	317.951	349.091	183.727	595.406		-31.14		93	0.257265		93	0.162712

## Sheet: exp1-endosome2
endosome 2							dMFI		%dMFI				background-adjusted
	frame #	Rab5(rim)	Rab5(background)	YFP(lumen)	CFP(lumen)		Rab5		frame #	Rab5		frame #	YFP/CFP		YFP background	CFP background
	1	385.647	414.047	212.588	662.619		-28.4		1	0.104714		1	0.196366		108	130
	2	382.942	411.301	220.174	682.275		-28.359		2	0.105133		2	0.203113
	3	374.435	402.299	223.725	693.163		-27.864		3	0.110185		3	0.205491
	4	364.657	396.732	214.5	647.938		-32.075		4	0.0672069		4	0.205623
	5	358.343	385.762	211.7	622.612		-27.419		5	0.114726		5	0.210511
	6	355.328	374.395	206.856	585.186		-19.067		6	0.199967		6	0.217177
	7	354.966	378.93	200.649	575.969		-23.964		7	0.149988		7	0.207748
	8	365.078	392.39	209.557	613.629		-27.312		8	0.115818		8	0.209989
	9	364.992	381.092	208.642	576.934		-16.1		9	0.230249		9	0.225183
	10	384.561	401.364	208.139	657.051		-16.803		10	0.223074		10	0.189999
	11	385.78	412.185	199.35	573.613		-26.405		11	0.125075		11	0.205923
	12	388.161	418.693	201.33	741.571		-30.532		12	0.0829549		12	0.152607
	13	380.177	405.994	202.071	671.911		-25.817		13	0.131076		13	0.173591
	14	356.645	367.426	198.205	632.938		-10.781		14	0.284535		14	0.179356
	15	351.177	367.727	201.786	581.08		-16.55		15	0.225656		15	0.207914
	16	360.435	370.983	198.562	610.58		-10.548		16	0.286913		16	0.188443
	17	348.817	368.653	188.615	612.644		-19.836		17	0.192119		17	0.167028
	18	358.542	384.403	204	607.337		-25.861		18	0.130627		18	0.201116
	19	370.734	386.551	203.5	593.786		-15.817		19	0.233137		19	0.205914
	20	374.968	395.847	203.893	597.393		-20.879		20	0.181474		20	0.205166
	21	358.839	378.011	197.804	546.714		-19.172		21	0.198896		21	0.215505
	22	365.795	378.114	192.431	555.949		-12.319		22	0.268838		22	0.198219
	23	453.212	393.891	190.409	559.993		59.321		23	1		23	0.191652
	24	431.061	381.261	193.453	532.664		49.8		24	0.902828		24	0.212219
	25	434.258	391.728	207.066	564.562		42.53		25	0.82863		25	0.227967
	26	431.015	390.418	202.613	537.022		40.597		26	0.808902		26	0.232452
	27	422.977	388.201	208.723	582.212		34.776		27	0.749492		27	0.222734
	28	422.129	403.568	196.17	553.562		18.561		28	0.584001		28	0.208163
	29	406.015	380.978	197.562	548.044		25.037		29	0.650095		29	0.214241
	30	425.114	394.924	199.27	550.759		30.19		30	0.702687		30	0.216918
	31	395.682	366.538	199.584	543.832		29.144		31	0.692012		31	0.221307
	32	384.97	376.429	195.745	530.664		8.541		32	0.481736		32	0.218999
	33	395.258	386.284	196.241	552.223		8.974		33	0.486155		33	0.208991
	34	376.129	375.21	198.375	558.089		0.919		34	0.403946		34	0.211113
	35	410.46	395.256	203.045	610.161		15.204		35	0.549739		35	0.197944
	36	396.323	400.705	196.705	598.509		-4.382		36	0.349843		36	0.189335
	37	398.355	394.864	195.839	615.143		3.491		37	0.430196		37	0.181058
	38	379.266	391.102	191.277	579.161		-11.836		38	0.273767		38	0.185406
	39	395.589	410.392	194.982	626.714		-14.803		39	0.243486		39	0.175115
	40	364.845	396.39	187.021	589.155		-31.545		40	0.0726161		40	0.172101
	41	364.466	398.907	183.299	581.876		-34.441		41	0.0430594		41	0.166636
	42	352.621	382.988	182.196	599.33		-30.367		42	0.0846389		42	0.158089
	43	363.078	401.738	186.093	658.959		-38.66		43	0		43	0.147635
	44	364.302	381.959	181.268	603.134		-17.657		44	0.214358		44	0.154857

## Sheet: exp1-endosome3
endosome 3							dMFI		%dMFI				background-adjusted
	frame #	Rab5(rim)	Rab5(background)	YFP(lumen)	CFP(lumen)		Rab5		frame #	Rab5		frame #	YFP/CFP		YFP background	CFP background
	1	427.566	429.172	366.144	688.029		-1.606		1	0.188738		1	0.4626		108	130
	2	450.993	449.348	363.433	710.933		1.645		2	0.218094		2	0.439694
	3	451.02	452.529	375.495	717.784		-1.509		3	0.189614		3	0.455091
	4	442.704	438.966	352.197	687.255		3.738		4	0.236993		4	0.438214
	5	437.789	440.417	348.856	672.159		-2.628		5	0.17951		5	0.444253
	6	426.092	438.426	348.312	660.928		-12.334		6	0.0918679		6	0.452626
	7	424.105	434.402	349.091	658.678		-10.297		7	0.110261		7	0.456026
	8	432.013	433.34	358.876	691.587		-1.327		8	0.191257		8	0.446727
	9	434.147	436.637	368.267	700.209		-2.49		9	0.180756		9	0.456441
	10	438.346	443.618	354.982	720.124		-5.272		10	0.155635		10	0.418526
	11	431.192	450.972	347	650.782		-19.78		11	0.0246329		11	0.458925
	12	439.659	445.641	346.402	681.605		-5.982		12	0.149224		12	0.432197
	13	422.384	432.605	337.02	660.469		-10.221		13	0.110948		13	0.431731
	14	419.183	415.109	310.367	641.262		4.074		14	0.240027		14	0.395819
	15	411.447	423.01	304.096	627.418		-11.563		15	0.0988298		15	0.394228
	16	425.348	422.15	305.656	617.953		3.198		16	0.232117		16	0.405072
	17	422.137	425.384	298.66	658.508		-3.247		17	0.173921		17	0.360751
	18	441.381	442.565	333.059	693.349		-1.184		18	0.192549		18	0.399502
	19	434.706	435.565	322.714	675.366		-0.859		19	0.195483		19	0.393706
	20	439.2	441.106	327.819	683.756		-1.906		20	0.186029		20	0.39696
	21	443.106	447.032	312.777	663.929		-3.926		21	0.167789		21	0.383529
	22	431.726	434.623	311.891	651.48		-2.897		22	0.177081		22	0.390985
	23	431.549	436.036	317.074	668.84		-4.487		23	0.162724		23	0.388008
	24	432.579	432.627	313.828	672.676		-0.048		24	0.202806		24	0.379283
	25	445.396	455.032	322.66	695.922		-9.636		25	0.11623		25	0.37931
	26	430.177	442.145	324.605	672.422		-11.968		26	0.0951727		26	0.399329
	27	445.567	455.945	336.277	698.352		-10.378		27	0.10953		27	0.401647
	28	446.396	454.295	319.641	652.344		-7.899		28	0.131914		28	0.405176
	29	431.165	438.25	330.441	673.051		-7.085		29	0.139265		29	0.409613
	30	440.256	445.159	330.238	673.422		-4.903		30	0.158967		30	0.40896
	31	443.72	452.832	315.562	661.363		-9.112		31	0.120961		31	0.390622
	32	453.726	470.15	311.922	633.875		-16.424		32	0.0549365		32	0.404708
	33	454.561	469.114	318.301	651.98		-14.553		33	0.071831		33	0.402891
	34	434.646	447.936	308.387	652.02		-13.29		34	0.0832355		34	0.383868
	35	466.427	479.041	326.344	702.703		-12.614		35	0.0893396		35	0.381252
	36	472.079	473.086	318.801	690.082		-1.007		36	0.194147		36	0.376375
	37	449.341	452.486	320.203	688.504		-3.145		37	0.174842		37	0.379949
	38	441.616	441.827	311.82	659.801		-0.211		38	0.201335		38	0.38471
	39	462.634	465.245	323.785	689.57		-2.611		39	0.179663		39	0.385626
	40	438.384	446.686	304.227	645.77		-8.302		40	0.128276		40	0.380454
	41	429.569	437.319	304.727	658.479		-7.75		41	0.13326		41	0.372251
	42	429.677	439.805	305.238	660.125		-10.128		42	0.111787		42	0.372059
	43	434.415	448.095	310.031	658.406		-13.68		43	0.0797139		43	0.38234
	44	464.029	466.768	312.307	670.212		-2.739		44	0.178508		44	0.378198
	45	434.843	434.179	302.328	660.28		0.664		45	0.209236		45	0.366463
	46	422.815	429.83	297.642	634.153		-7.015		46	0.139897		46	0.37616
	47	426.577	438.161	298.175	644.296		-11.584		47	0.0986401		47	0.369777
	48	445.298	456.237	299.179	653.927		-10.939		48	0.104464		48	0.364896
	49	453.595	449.817	320.828	697.701		3.778		49	0.237354		49	0.374895
	50	449.625	456.513	320.186	700.212		-6.888		50	0.141043		50	0.372118
	51	451.768	464.777	322.485	693.54		-13.009		51	0.0857728		51	0.380603
	52	466.512	481.255	328.371	710.316		-14.743		52	0.0701154		52	0.379743
	53	456.463	461.955	334.375	750.551		-5.492		53	0.153649		53	0.364797
	54	440.006	456.193	319.884	721.404		-16.187		54	0.0570766		54	0.358273
	55	458.774	459.455	324.406	741.605		-0.681		55	0.197091		55	0.353833
	56	483.226	471.482	322.59	734.133		11.744		56	0.309284		56	0.355203
	57	552.064	463.826	320.935	723.406		88.238		57	1		57	0.358835
	58	500.25	447.469	310.666	704.942		52.781		58	0.679835		58	0.352498
	59	498.413	465.554	291.038	672.549		32.859		59	0.499946		59	0.337367
	60	494.403	437.677	295.665	692.456		56.726		60	0.715457		60	0.333653
	61	481.261	436.017	306.747	724.965		45.244		61	0.611778		61	0.334048
	62	525.193	468.099	307.206	731.465		57.094		62	0.71878		62	0.331201
	63	509.443	455.793	297.731	756.839		53.65		63	0.687682		63	0.302679
	64	495.415	457.591	295.56	728.693		37.824		64	0.544778		64	0.313282
	65	496.176	448.078	290.987	715.873		48.098		65	0.637549		65	0.312332
	66	495.097	450.724	293.557	724.013		44.373		66	0.603913		66	0.312379
	67	461.767	462.268	285.41	695.027		-0.501		67	0.198716		67	0.313985
	68	421.599	434.5	288.945	699.341		-12.901		68	0.0867481		68	0.317815
	69	451.223	427.092	293.951	712.599		24.131		69	0.421135		69	0.319175
	70	465.864	434.096	286.39	695.989		31.768		70	0.490094		70	0.315183
	71	496.929	449.204	288.152	711.685		47.725		71	0.634181		71	0.309707
	72	490.415	448.194	289.253	717.304		42.221		72	0.584482		72	0.308619
	73	477.779	455.027	278.717	692.72		22.752		73	0.408683		73	0.303378
	74	512.614	471.284	288.294	716.411		41.33		74	0.576436		74	0.307453
	75	530.801	488.345	302.772	765.111		42.456		75	0.586604		75	0.306674
	76	513.93	479.808	310.089	803.621		34.122		76	0.51135		76	0.300004
	77	451.256	440.521	282.939	719.229		10.735		77	0.300173		77	0.296895
	78	434.034	449.543	280.756	717.288		-15.509		78	0.0631987		78	0.294159
	79	492.352	482.918	309.237	793.57		9.434		79	0.288426		79	0.303264
	80	503.875	470.366	298.196	749.75		33.509		80	0.505815		80	0.306891
	81	468.239	459.095	300.165	745.896		9.144		81	0.285807		81	0.312009
	82	507.592	466.092	311.298	765.444		41.5		82	0.577971		82	0.319931
	83	505.25	464.142	308.711	747.086		41.108		83	0.574432		83	0.325256
	84	469.165	456.561	306.224	773.35		12.604		84	0.31705		84	0.308112
	85	430.58	437.918	293.237	747.291		-7.338		85	0.13698		85	0.300081
	86	426.17	436.44	287.063	768.775		-10.27		86	0.110505		86	0.280322
	87	434.761	432.317	290.037	777.639		2.444		87	0.225308		87	0.281078
	88	433.696	452.158	299.023	748.994		-18.462		88	0.0365341		88	0.308602
	89	425.56	431.65	286.229	756.427		-6.09		89	0.148249		89	0.284517
	90	416.159	431.685	288.851	754.193		-15.526		90	0.0630452		90	0.289736
	91	396.182	418.69	279.535	733.772		-22.508		91	0		91	0.284106
	92	407.727	423.263	292.953	782.348		-15.536		92	0.0629549		92	0.283519
	93	413.301	423.31	296.519	782.427		-10.009		93	0.112862		93	0.28895
	94	408.892	416.741	287.642	766.301		-7.849		94	0.132366		94	0.282322
	95	399.068	412.496	269.263	713.206		-13.428		95	0.0819894		95	0.276511
	96	410.523	419.289	276.614	775.199		-8.766		96	0.124086		96	0.261336
	97	414.261	422.561	283.397	793.887		-8.3		97	0.128294		97	0.264197
	98	412.915	423.864	285.023	810.023		-10.949		98	0.104374		98	0.260319
	99	405.58	422.518	273.797	773.423		-16.938		99	0.0502953		99	0.25768
	100	401.106	411.161	273.726	749.262		-10.055		100	0.112446		100	0.267619
	101	375.79	388.284	255.462	669.174		-12.494		101	0.0904231		101	0.273496
	102	380.886	389.147	261.218	700.31		-8.261		102	0.128646		102	0.268657
	103	414.244	430.004	288.288	796.174		-15.76		103	0.0609322		103	0.270632
	104	403.538	409.613	281.642	790.272		-6.075		104	0.148385		104	0.262986
	105	391.665	406.332	264.759	723.788		-14.667		105	0.0708017		105	0.263998
	106	385.255	400	269.527	737.734		-14.745		106	0.0700973		106	0.265786
	107	412.027	419.212	279.097	800.186		-7.185		107	0.138362		107	0.255298
	108	404.016	415.734	285.844	808.981		-11.718		108	0.0974302		108	0.261928
	109	408.411	412.698	282.445	807.188		-4.287		109	0.16453		109	0.257602
	110	400.212	412.908	282.871	792.607		-12.696		110	0.0885991		110	0.263914
	111	409.136	416.842	289.461	818.817		-7.706		111	0.133657		111	0.263439
	112	409.484	418.613	287.751	812.169		-9.129		112	0.120808		112	0.263499
	113	404.516	416.212	284.788	816.011		-11.696		113	0.0976288		113	0.257704
	114	401.006	408.085	272.98	797.522		-7.079		114	0.139319		114	0.247153
	115	382.994	398.387	266.818	789.84		-15.393		115	0.0642461		115	0.240692

## Sheet: exp1-endosome4
endosome 4							dMFI		%dMFI				background-adjusted
	frame #	Rab5(rim)	Rab5(background)	YFP(lumen)	CFP(lumen)		Rab5		frame #	Rab5		frame #	YFP/CFP		YFP background	CFP background
	1	566.411	574.261	437.83	944.688		-7.85		1	0.212755		1	0.404854		108	130
	2	584.75	591.795	424.5	980.452		-7.045		2	0.218725		2	0.372155
	3	580.508	589.432	427.452	966.048		-8.924		3	0.20479		3	0.382098
	4	550.871	556.119	412.929	928.152		-5.248		4	0.232052		4	0.382044
	5	557.112	571.198	398.381	903.67		-14.086		5	0.166506		5	0.375329
	6	555.767	569.721	403.309	912.577		-13.954		6	0.167485		6	0.377355
	7	565.458	582.585	389.452	894.596		-17.127		7	0.143953		7	0.368106
	8	572.71	595.415	382.723	883.884		-22.705		8	0.102584		8	0.36441
	9	573.326	588.353	390.81	889.723		-15.027		9	0.159527		9	0.372254
	10	581.581	590.885	382.122	953.737		-9.304		10	0.201971		10	0.332779
	11	586.674	614.478	382.883	853.27		-27.804		11	0.0647676		11	0.380056
	12	582.228	590.714	384.218	899.071		-8.486		12	0.208038		12	0.359158
	13	575.457	584.046	390.765	907.711		-8.589		13	0.207274		13	0.363586
	14	549.713	553.078	347.564	858.878		-3.365		14	0.246017		14	0.328675
	15	540.833	554.098	358.394	892.679		-13.265		15	0.172595		15	0.328309
	16	542.568	559.75	345.65	855.219		-17.182		16	0.143545		16	0.327694
	17	549.765	564.457	347.606	925.796		-14.692		17	0.162012		17	0.30109
	18	593.568	608.783	377.343	951.898		-15.215		18	0.158133		18	0.327709
	19	579.309	588.531	364.949	936.122		-9.222		19	0.202579		19	0.318747
	20	579.831	582.432	374.526	934.506		-2.601		20	0.251684		20	0.331292
	21	577.919	582.297	351.083	869.827		-4.378		21	0.238505		21	0.328567
	22	542.125	551.521	338.686	824.115		-9.396		22	0.201289		22	0.332346
	23	544.318	562.005	332	827.438		-17.687		23	0.139799		23	0.321176
	24	556.132	564.38	338.699	830.064		-8.248		24	0.209803		24	0.32954
	25	641	630.578	344.212	858.167		10.422		25	0.348268		25	0.324393
	26	625	631.557	342.276	851.744		-6.557		26	0.222344		26	0.324597
	27	639.023	675.56	364.654	871.86		-36.537		27	0		27	0.34596
	28	634.545	664.679	340.809	842.257		-30.134		28	0.0474873		28	0.326861
	29	608.828	641.617	345.919	855.669		-32.789		29	0.0277967		29	0.327862
	30	609.621	618.995	339.19	850.445		-9.374		30	0.201452		30	0.320899
	31	608.096	611.786	331.526	840.731		-3.69		31	0.243607		31	0.314502
	32	614.667	627.467	324.474	816.241		-12.8		32	0.176043		32	0.315449
	33	601.924	597.114	334.613	844.657		4.81		33	0.306647		33	0.317093
	34	595.326	596.261	328.255	838.358		-0.935		34	0.264039		34	0.310937
	35	601.811	598.636	338.307	881.978		3.175		35	0.294521		35	0.306268
	36	603.818	603.092	332.686	872.102		0.726		36	0.276358		36	0.30277
	37	707.212	608.913	338.248	894.255		98.299		37	1		37	0.301271
	38	660.71	600.324	330.777	869.768		60.386		38	0.718821		38	0.301144
	39	670.121	606.523	337.268	923.857		63.598		39	0.742643		39	0.288803
	40	635.484	571.528	319.185	868.847		63.956		40	0.745298		40	0.28583
	41	634.068	560.772	326.657	872.591		73.296		41	0.814567		41	0.294451
	42	606.318	544.397	321.526	890.088		61.921		42	0.730206		42	0.280923
	43	609.644	554.37	326.015	897.226		55.274		43	0.680909		43	0.28416
	44	610.553	563.451	322.504	884.482		47.102		44	0.620302		44	0.284306
	45	575.902	539.321	319.336	886.27		36.581		45	0.542274		45	0.279445
	46	598.235	540.897	324.701	898.277		57.338		46	0.696216		46	0.282061
	47	615.205	546.848	328.248	899.109		68.357		47	0.777938		47	0.286368
	48	613.477	566.929	331.343	909.314		46.548		48	0.616193		48	0.286589
	49	629.432	572.81	349.883	947.599		56.622		49	0.690906		49	0.295846
	50	633.081	577.858	350.545	964.607		55.223		50	0.68053		50	0.29061
	51	619.226	582.011	354.634	974.92		37.215		51	0.546976		51	0.291902
	52	631.581	595.705	352.777	956.616		35.876		52	0.537045		52	0.296119
	53	634.347	576.188	345.536	959.348		58.159		53	0.702305		53	0.286413
	54	618.258	562.807	340.598	944.339		55.451		54	0.682221		54	0.285628
	55	604.702	550.517	342.393	945.741		54.185		55	0.672832		55	0.287338
	56	592.194	546.051	341.973	940.429		46.143		56	0.613189		56	0.288703
	57	591.637	534.267	340.455	928.125		57.37		57	0.696453		57	0.291251
	58	566.629	521.006	333.741	906.562		45.623		58	0.609333		58	0.290693
	59	507.817	517.784	298.231	864.673		-9.967		59	0.197054		59	0.258933
	60	485.286	493.845	298.198	872.814		-8.559		60	0.207497		60	0.256051

## Sheet: exp1-endosome5
endosome 5							dMFI		%dMFI				background-adjusted
	frame #	Rab5(rim)	Rab5(background)	YFP(lumen)	CFP(lumen)		Rab5		frame #	Rab5		frame #	YFP/CFP		YFP background	CFP background
	1	545.763	568.176	451.462	1077.2		-22.413		1	0.208549		1	0.362609		108	130
	2	549.139	578.325	441.949	1069.12		-29.186		2	0.156226		2	0.355596
	3	543.25	580.9	453.571	1075.63		-37.65		3	0.0908403		3	0.365441
	4	543.674	570.82	441.718	1046.79		-27.146		4	0.171985		4	0.364009
	5	534.715	567.905	427.599	1050.12		-33.19		5	0.125295		5	0.347343
	6	523.535	554.615	423.542	1021.37		-31.08		6	0.141595		6	0.353995
	7	533.099	557.361	416.375	991.282		-24.262		7	0.194265		7	0.358042
	8	545.539	574.034	426.792	1027.44		-28.495		8	0.161564		8	0.355222
	9	541.378	567.145	423.677	1038.7		-25.767		9	0.182638		9	0.347395
	10	532.284	566.425	413.26	1082.86		-34.141		10	0.117948		10	0.320362
	11	566.375	583.647	417.978	1002.84		-17.272		11	0.248264		11	0.355138
	12	555.012	572.103	410.693	1001.87		-17.091		12	0.249662		12	0.347179
	13	546.079	565.273	411.043	1011.52		-19.194		13	0.233416		13	0.343775
	14	516.546	539.779	355.014	974.149		-23.233		14	0.202214		14	0.292619
	15	507.993	547.862	369.428	1024.91		-39.869		15	0.0736981		15	0.292128
	16	506.727	548.598	368.745	956.226		-41.871		16	0.0582323		16	0.315586
	17	510.508	547.131	352.5	1053.36		-36.623		17	0.098774		17	0.264795
	18	530.347	579.756	387.25	1078.1		-49.409		18	0		18	0.294537
	19	532.603	577.589	374.987	1062.31		-44.986		19	0.0341684		19	0.286372
	20	535.809	577.583	380.615	1042.01		-41.774		20	0.0589817		20	0.298918
	21	530.919	567.021	362.788	996.641		-36.102		21	0.102799		21	0.293995
	22	498.801	534.359	353.122	908.769		-35.558		22	0.107001		22	0.314756
	23	516.184	550.849	365.788	929.692		-34.665		23	0.1139		23	0.322359
	24	514.809	549.005	373.301	932.237		-34.196		24	0.117523		24	0.330702
	25	593.434	624.693	377.455	958.327		-31.259		25	0.140212		25	0.3253
	26	553.303	586.717	394.219	975.124		-33.414		26	0.123564		26	0.338671
	27	580.917	628.048	410.219	1029.88		-47.131		27	0.0175979		27	0.335845
	28	566.402	610.069	376.918	944.801		-43.667		28	0.0443579		28	0.330041
	29	548.831	590.057	396.291	986.795		-41.226		29	0.0632151		29	0.336476
	30	553.279	584.198	373.483	950.318		-30.919		30	0.142838		30	0.323634
	31	533.581	567.068	360.265	934.53		-33.487		31	0.123		31	0.313556
	32	564.708	577.11	357.87	927.554		-12.402		32	0.285885		32	0.313295
	33	543.271	560.435	371.638	941.034		-17.164		33	0.249098		33	0.325064
	34	520.301	548.661	368.113	924.02		-28.36		34	0.162607		34	0.32759
	35	534.147	558.411	376.25	980.404		-24.264		35	0.194249		35	0.315438
	36	550.273	576.25	383.701	996.073		-25.977		36	0.181016		36	0.318335
	37	529.667	555.098	376.255	990.788		-25.431		37	0.185234		37	0.311639
	38	503.326	530.114	364.409	935.277		-26.788		38	0.174751		38	0.318411
	39	537.538	562.348	368.109	1013.08		-24.81		39	0.190031		39	0.294547
	40	527.735	547.63	347.861	994.234		-19.895		40	0.228001		40	0.277542
	41	514.167	528.283	359.277	996.219		-14.116		41	0.272644		41	0.290085
	42	504.379	517.674	354.723	1066.79		-13.295		42	0.278987		42	0.263371
	43	548.421	537.128	356.241	1037.28		11.293		43	0.468933		43	0.273609
	44	633.653	553.615	340.876	959.949		80.038		44	1		44	0.280591
	45	568.062	529.2	329.311	901.09		38.862		45	0.681908		45	0.287011
	46	553.757	520.39	332.944	890.446		33.367		46	0.639459		46	0.295805
	47	555.312	525.015	343.599	899.395		30.297		47	0.615742		47	0.306213
	48	581.833	549.1	340.266	915.446		32.733		48	0.634561		48	0.295712
	49	575.625	549.095	360.593	953.571		26.53		49	0.586642		49	0.306705
	50	594.479	553.255	368	989.175		41.224		50	0.700155		50	0.302616
	51	570.34	550.795	356.78	966.881		19.545		51	0.532681		51	0.29727
	52	599.882	548.555	336.017	972.243		51.327		52	0.778203		52	0.270726
	53	534.72	529.967	335.467	954.883		4.753		53	0.418411		53	0.275757
	54	538.788	528.076	335.343	946.606		10.712		54	0.464445		54	0.2784
	55	521.689	516.212	335.577	927.445		5.477		55	0.424004		55	0.285383
	56	548.831	539.047	333.359	930.327		9.784		56	0.457276		56	0.281584
	57	507.11	522.385	321.583	901.885		-15.275		57	0.263691		57	0.276703
	58	493.074	501.901	316.641	913.692		-8.827		58	0.313503		58	0.266228
	59	489.044	511.651	300.141	859.045		-22.607		59	0.20705		59	0.263552
	60	468.424	494.946	305.92	857.985		-26.522		60	0.176806		60	0.271874
	61	460.699	483.896	317.623	920.768		-23.197		61	0.202492		61	0.265088
	62	487.081	500.047	319.038	920.481		-12.966		62	0.281528		62	0.266974
	63	490.941	504.667	311.622	941.756		-13.726		63	0.275657		63	0.250841
	64	486.449	506.083	309.115	933.269		-19.634		64	0.230017		64	0.250371
	65	477.757	492.474	302.923	897.929		-14.717		65	0.268002		65	0.253829
	66	484.221	496.859	297.372	886.006		-12.638		66	0.284062		66	0.25049
	67	482.824	507.224	293.994	886.936		-24.4		67	0.193199		67	0.24572
	68	463.684	479.333	301.237	875.686		-15.649		68	0.260802		68	0.25914
	69	461.963	480.057	300.628	865.705		-18.094		69	0.241914		69	0.261828
	70	461.932	487.239	292.616	864.548		-25.307		70	0.186192		70	0.251333
	71	475.72	502.016	298.301	893.158		-26.296		71	0.178552		71	0.24936
	72	456.076	489.059	291.753	887.87		-32.983		72	0.126894		72	0.24246
	73	460.257	486.401	287.763	857.821		-26.144		73	0.179726		73	0.246988
	74	482.265	500.12	289.904	876.609		-17.855		74	0.24376		74	0.24364
	75	504.265	518.406	305.551	906.833		-14.141		75	0.272451		75	0.254303
	76	499.096	512.5	307.75	969.423		-13.404		76	0.278145		76	0.237961
	77	453.75	470.286	293.321	897.462		-16.536		77	0.253949		77	0.241473
	78	476.86	488.573	290.609	912.596		-11.713		78	0.291208		78	0.233338
	79	488.412	506.323	322.641	1005.19		-17.911		79	0.243327		79	0.24525
	80	475.662	497.135	310.949	984.282		-21.473		80	0.21581		80	0.237567
	81	467.963	489.078	305.263	953.16		-21.115		81	0.218576		81	0.239641
	82	485.257	498.837	314.934	996.506		-13.58		82	0.276785		82	0.238814
	83	480.929	497.612	307.06	989.524		-16.683		83	0.252814		83	0.231593
	84	474.364	491.505	290.801	989.681		-17.141		84	0.249276		84	0.212638
	85	455.199	463.839	294.744	990.526		-8.64		85	0.314947		85	0.217011
	86	456.096	467.536	294.128	983.109		-11.44		86	0.293317		86	0.218176
	87	449.824	470.802	293.679	975.276		-20.978		87	0.219634		87	0.219667
	88	472.079	480.015	312.945	987.512		-7.936		88	0.320386		88	0.239
	89	443.197	461.473	291.664	960.418		-18.276		89	0.240508		89	0.221171
	90	439.28	458.713	292.555	970.726		-19.433		90	0.23157		90	0.219519
	91	453.893	459.276	286.476	994.311		-5.383		91	0.340108		91	0.206495
	92	456.432	471.91	296.479	1037.9		-15.478		92	0.262123		92	0.2076
	93	442.629	457.106	295.658	995.548		-14.477		93	0.269856		93	0.216808
	94	444.053	456.207	289.582	978.377		-12.154		94	0.287801		94	0.214035
	95	421.562	435.511	273.927	878.185		-13.949		95	0.273935		95	0.221773
	96	431.508	444.244	284.613	966.984		-12.736		96	0.283305		96	0.211011
	97	430.578	452.465	288.691	996.062		-21.887		97	0.212612		97	0.208635
	98	438.328	453.15	296.129	995.96		-14.822		98	0.26719		98	0.217249
	99	430.742	447.256	283.113	978.468		-16.514		99	0.254119		99	0.206387
	100	416.109	437.633	283.194	958.065		-21.524		100	0.215416		100	0.21157
	101	411.433	428.324	269.827	852.144		-16.891		101	0.251207		101	0.224092
	102	416.573	430.585	278.33	898.196		-14.012		102	0.273448		102	0.221727
	103	437.621	461.807	300.268	984.098		-24.186		103	0.194852		103	0.225112
	104	419.379	440.205	292.045	979.295		-20.826		104	0.220809		104	0.216703
	105	414.225	437.688	285.317	950.231		-23.463		105	0.200437		105	0.216179

## Sheet: exp1-endosome6
endosome 6							dMFI		%dMFI				background-adjusted
	frame #	Rab5(rim)	Rab5(background)	YFP(lumen)	CFP(lumen)		Rab5		frame #	Rab5		frame #	YFP/CFP		YFP background	CFP background
	1	235.318	243.339	186.224	554.305		-8.021		1	0.217289		1	0.184358		108	130
	2	233.906	242.81	191.919	568.266		-8.904		2	0.200101		2	0.19148
	3	239.335	242.016	207.247	583.447		-2.681		3	0.321233		3	0.218872
	4	236.75	239.984	201.067	547.827		-3.234		4	0.310468		4	0.222741
	5	242.105	239.06	197.912	551.753		3.045		5	0.43269		5	0.213186
	6	234.83	238.738	190.214	527.922		-3.908		6	0.297349		6	0.206608
	7	238.401	240.198	187.469	522.708		-1.797		7	0.33844		7	0.202362
	8	275.325	243.135	199.401	517.223		32.19		8	1		8	0.236042
	9	248.095	242.643	211.404	485.751		5.452		9	0.479542		9	0.290664
	10	258.28	241.56	216.96	468.432		16.72		10	0.698875		10	0.321955
	11	252.915	243.861	219.708	465.824		9.054		11	0.549655		11	0.332639
	12	258	246.131	208.126	457.128		11.869		12	0.60445		12	0.306076
	13	267.545	247.635	185.734	439.119		19.91		13	0.760969		13	0.251469
	14	237.217	238.072	178.75	398.162		-0.855		14	0.356776		14	0.263833
	15	248.278	245.606	183.759	412.878		2.672		15	0.425429		15	0.267815
	16	244.777	236.217	187.501	385.636		8.56		16	0.54004		16	0.310993
	17	247.483	241.403	183.113	392.845		6.08		17	0.491766		17	0.285769
	18	246.583	245.369	180.72	396.899		1.214		18	0.397049		18	0.272463
	19	258.828	248.153	175.777	387.622		10.675		19	0.581208		19	0.263087
	20	249.495	238.984	173.914	372.477		10.511		20	0.578016		20	0.271836
	21	242.823	233.597	169.849	360.115		9.226		21	0.553003		21	0.268774
	22	238.719	232.371	162.776	349.188		6.348		22	0.496983		22	0.249904
	23	235.635	237.173	160.862	348.531		-1.538		23	0.343481		23	0.241897
	24	232.203	235.371	161.31	360.201		-3.168		24	0.311753		24	0.23158
	25	228.962	232.667	164.653	385.364		-3.705		25	0.3013		25	0.221852
	26	226.696	229.542	164.08	379.209		-2.846		26	0.318021		26	0.225032
	27	226.722	237.662	161.153	383.777		-10.94		27	0.16047		27	0.209448
	28	228.869	240.478	159.02	366.433		-11.609		28	0.147448		28	0.215791
	29	227.75	238.397	156.063	374.316		-10.647		29	0.166174		29	0.196725
	30	222.017	229.957	155.864	379.766		-7.94		30	0.218866		30	0.191635
	31	221.983	228.073	154.636	381.12		-6.09		31	0.254876		31	0.185712
	32	223.693	232.483	154.304	382.275		-8.79		32	0.20232		32	0.183546
	33	226.636	231.793	154	379.345		-5.157		33	0.273037		33	0.184483
	34	219.835	227.935	151.604	376.823		-8.1		34	0.215751		34	0.176661
	35	224.54	230.142	154.56	385.108		-5.602		35	0.264375		35	0.182511
	36	225.134	233.805	154.043	384.789		-8.671		36	0.204637		36	0.18071
	37	223.226	234.127	155.406	379.316		-10.901		37	0.161229		37	0.190144
	38	224.488	236.95	156.648	393.391		-12.462		38	0.130844		38	0.184699
	39	229.207	238.291	153.723	382.66		-9.084		39	0.196598		39	0.180967
	40	224	232.232	149.57	372.289		-8.232		40	0.213182		40	0.171572
	41	219.128	229.391	149.113	363.633		-10.263		41	0.173648		41	0.175973
	42	224.884	236.582	151.449	369.227		-11.698		42	0.145716		42	0.181622
	43	221.213	232.818	150.312	364.273		-11.605		43	0.147526		43	0.18061
	44	217.89	234.595	147.883	360.328		-16.705		44	0.048254		44	0.173157
	45	217.744	229.277	147.273	359.113		-11.533		45	0.148927		45	0.171413
	46	218.396	226.986	147.789	358.988		-8.59		46	0.206213		46	0.17376
	47	225.22	235.873	148.578	374.75		-10.653		47	0.166057		47	0.165794
	48	219.951	231.373	149.262	368.219		-11.422		48	0.151088		48	0.17321
	49	228.835	238.064	153.918	387.473		-9.229		49	0.193775		49	0.178341
	50	230.506	247.75	149.649	393.249		-17.244		50	0.0377623		50	0.158211
	51	231.481	250.665	148.613	389.813		-19.184		51	0		51	0.156316
	52	229.314	246.703	147.689	378.871		-17.389		52	0.0349399		52	0.159476
	53	225.955	242.962	149.067	376.88		-17.007		53	0.0423755		53	0.166344
	54	223.647	240.052	148.382	379.031		-16.405		54	0.0540935		54	0.162157
	55	215.942	230.571	147.142	368.52		-14.629		55	0.0886635		55	0.164104
	56	221	237.708	146.667	368.689		-16.708		56	0.0481956		56	0.161997
	57	220.776	232.283	146.396	364.378		-11.507		57	0.149434		57	0.163821
	58	215.301	226.066	142.307	356.324		-10.765		58	0.163877		58	0.151584
	59	221.218	234.5	142.04	352.076		-13.282		59	0.114883		59	0.153281
	60	212.513	225.042	141.049	352.716		-12.529		60	0.12954		60	0.148391
	61	215.442	228.929	141.596	363.6		-13.487		61	0.110893		61	0.143818
	62	217.782	231.698	140.978	360.653		-13.916		62	0.102542		62	0.142977
	63	217.865	232.561	142.182	354.6		-14.696		63	0.0873594		63	0.152191
	64	220.647	234.142	140.831	362.489		-13.495		64	0.110737		64	0.141215
	65	212.507	225.534	141.091	351.303		-13.027		65	0.119847		65	0.149528
	66	209.375	225.275	139.188	349.933		-15.9		66	0.0639234		66	0.141807
	67	214.204	225.343	139.923	334.245		-11.139		67	0.156597		67	0.156298
	68	210.013	225.632	139.067	342.471		-15.619		68	0.0693931		68	0.146218
	69	206.836	221.559	137.433	320.312		-14.723		69	0.0868338		69	0.154657
	70	212.875	225.314	139.577	339.909		-12.439		70	0.131292		70	0.150432
	71	202.599	217.059	132.5	338.452		-14.46		71	0.0919531		71	0.117533
	72	204.033	217.436	130.971	331.385		-13.403		72	0.112528		72	0.114065
	73	205.382	218.926	136.26	334.75		-13.544		73	0.109783		73	0.138022
	74	206.572	221.608	135.981	346.668		-15.036		74	0.0807412		74	0.129142
	75	202.105	212.667	135.889	343.63		-10.562		75	0.167828		75	0.130548
	76	208.961	223.015	140.803	363.716		-14.054		76	0.099856		76	0.140354
	77	210.388	222.098	137.269	344.024		-11.71		77	0.145482		77	0.136756
	78	199.553	213.245	136.909	337.5		-13.692		78	0.106902		78	0.13932
	79	207.158	222.338	137.091	368.163		-15.18		79	0.0779383		79	0.122147
	80	203.326	216.015	138.26	371.175		-12.689		80	0.126426		80	0.125469
	81	205.479	218.255	138.944	361.893		-12.776		81	0.124732		81	0.133441
	82	209.097	224.025	139.26	364.915		-14.928		82	0.0828435		82	0.133069
	83	200.472	213.75	137.695	354.322		-13.278		83	0.114961		83	0.132377
	84	198.458	210.64	134.034	350.469		-12.182		84	0.136295		84	0.118085
	85	198.924	209.46	135.243	353.559		-10.536		85	0.168334		85	0.12186
	86	196.722	209.645	134.91	360.746		-12.923		86	0.121871		86	0.116622
	87	199.653	209.315	134.921	356.91		-9.662		87	0.185347		87	0.118642
	88	202.125	212.755	134.322	361.977		-10.63		88	0.166504		88	0.113468
	89	205.208	215.95	134.169	361.819		-10.742		89	0.164324		89	0.112885
	90	201.153	213.865	134.017	358.52		-12.712		90	0.125978		90	0.11385
	91	198.625	211.97	134.153	355.537		-13.345		91	0.113657		91	0.115959
	92	202.292	211.795	133.35	372.492		-9.503		92	0.188442		92	0.10454
	93	206.722	216.08	136.994	376		-9.358		93	0.191264		93	0.117862
	94	207.257	218	135.853	358.079		-10.743		94	0.164305		94	0.12212
	95	202.208	209.77	131.836	334.859		-7.562		95	0.226223		95	0.116353
	96	200.993	208.441	135.293	361.514		-7.448		96	0.228442		96	0.117889
	97	199.037	212.495	137.936	377.897		-13.458		97	0.111457		97	0.12076
	98	200.015	213.344	136.103	372.141		-13.329		98	0.113968		98	0.11606
	99	199.061	215.25	133.234	362.832		-16.189		99	0.058298		99	0.108379
	100	198.682	212.304	132.153	351.175		-13.622		100	0.108265		100	0.109203

## Sheet: exp1-endosome7
endosome 7							dMFI		%dMFI				background-adjusted
	frame #	Rab5(rim)	Rab5(background)	YFP(lumen)	CFP(lumen)		Rab5		frame #	Rab5		frame #	YFP/CFP		YFP background	CFP background
	1	694.597	685.295	212.497	742.141		9.302		1	0.511202		1	0.170707		108	130
	2	700.735	689.323	217.058	684.16		11.412		2	0.529604		2	0.196799
	3	637.794	663.781	218.071	640.308		-25.987		3	0.20344		3	0.215695
	4	614.294	640.156	199.673	628.712		-25.862		4	0.20453		4	0.18382
	5	630.191	654.552	199.026	599.25		-24.361		5	0.21762		5	0.193982
	6	628.544	654.797	194.41	584.212		-26.253		6	0.20112		6	0.190242
	7	686.521	627.895	191.294	574.136		58.626		7	0.941367		7	0.187542
	8	661.132	631.84	194.056	576.802		29.292		8	0.685539		8	0.192604
	9	594.91	630.335	189.497	542.458		-35.425		9	0.121129		9	0.197589
	10	600.729	636.54	187.333	557.797		-35.811		10	0.117762		10	0.185445
	11	731.014	665.665	189.266	569.085		65.349		11	1		11	0.18508
	12	742.145	682.294	184.038	514.024		59.851		12	0.952051		12	0.198003
	13	727.98	683.02	165.308	479.87		44.96		13	0.822183		13	0.163798
	14	698.972	639.12	167.678	504.508		59.852		14	0.95206		14	0.15935
	15	688.778	674.535	167.333	553		14.243		15	0.554294		15	0.140267
	16	695.353	663.135	169.891	493.269		32.218		16	0.711058		16	0.170372
	17	707.243	697.865	179.718	516.596		9.378		17	0.511865		17	0.185511
	18	709.417	703.511	178	497.073		5.906		18	0.481585		18	0.190698
	19	708.462	738.576	173.788	503.139		-30.114		19	0.167447		19	0.17631
	20	656.129	682.087	171	483.883		-25.958		20	0.203693		20	0.178025
	21	659.356	691.957	171.007	487.036		-32.601		21	0.145758		21	0.176472
	22	611.697	660.332	167.693	462.781		-48.635		22	0.0059217		22	0.179376
	23	624.023	673.337	167.489	437.277		-49.314		23	0		23	0.193601
	24	627.424	671.522	168.022	479.489		-44.098		24	0.0454898		24	0.171742
	25	601.22	649.652	169.314	608.058		-48.432		25	0.00769211		25	0.128256
	26	615.447	647.462	164.27	610.467		-32.015		26	0.150868		26	0.117115
	27	632.939	658.386	168.496	649.628		-25.447		27	0.208149		27	0.116422
	28	595.462	620.163	161.657	625.204		-24.701		28	0.214655		28	0.108353
	29	606.152	627.951	162.117	619.109		-21.799		29	0.239964		29	0.110644
	30	549.524	576.562	152.009	575.705		-27.038		30	0.194274		30	0.0987402
	31	553.927	581.636	149.982	637.036		-27.709		31	0.188422		31	0.0827989
	32	528.056	571.074	149.679	628.17		-43.018		32	0.0549087		32	0.0836642
	33	503.581	541.699	145.241	623.714		-38.118		33	0.0976427		33	0.0754303
	34	524.194	566.778	147.911	673.964		-42.584		34	0.0586937		34	0.0733707
	35	533.323	582.227	153.188	647.134		-48.904		35	0.0035757		35	0.0873816

## Sheet: exp1-endosome8
endosome 8							dMFI		%dMFI				background-adjusted
	frame #	Rab5(rim)	Rab5(background)	YFP(lumen)	CFP(lumen)		Rab5		frame #	Rab5		frame #	YFP/CFP		YFP background	CFP background
	1	368.509	397.525	201.534	378.25		-29.016		1	0.139452		1	0.376773		108	130
	2	366.964	415.868	194.402	361.773		-48.904		2	0		2	0.372787
	3	380.929	420.414	197.738	357.36		-39.485		3	0.0660449		3	0.394696
	4	368.953	404.257	190.786	351.172		-35.304		4	0.0953616		4	0.374306
	5	362.888	398.465	191.906	334.378		-35.577		5	0.0934474		5	0.410543
	6	371.671	403.654	189.617	344.188		-31.983		6	0.118648		6	0.381053
	7	392.734	414.117	192.186	343.423		-21.383		7	0.192974		7	0.394456
	8	375.343	402.85	195.135	359.422		-27.507		8	0.150033		8	0.379802
	9	382.089	408.327	187.623	350.426		-26.238		9	0.158931		9	0.361223
	10	387.395	424.577	203.244	360.627		-37.182		10	0.0821933		10	0.412979
	11	375.931	414.103	190.712	350.946		-38.172		11	0.0752516		11	0.374354
	12	388.335	424.057	191.8	353.2		-35.722		12	0.0924307		12	0.375448
	13	375.396	401.63	184.37	354.417		-26.234		13	0.158959		13	0.340304
	14	350.4	372.949	179.212	339.469		-22.549		14	0.184798		14	0.339964
	15	368.221	390.647	188.962	350.579		-22.426		15	0.185661		15	0.367043
	16	360.196	391.723	188.394	349.125		-31.527		16	0.121846		16	0.366886
	17	364.308	399.589	184.405	372.104		-35.281		17	0.0955229		17	0.315588
	18	364.242	400.637	188.614	365.896		-36.395		18	0.0877117		18	0.341735
	19	356.417	385.986	188.847	368.138		-29.569		19	0.135575		19	0.339496
	20	355.848	380.118	188.99	339.667		-24.27		20	0.172731		20	0.386279
	21	360.754	387.706	185.225	337.83		-26.952		21	0.153925		21	0.371578
	22	345.697	375.564	183.167	316.62		-29.867		22	0.133485		22	0.402781
	23	346.152	377.378	166.562	347.98		-31.226		23	0.123956		23	0.268658
	24	353.779	388.932	182.754	330.943		-35.153		24	0.0964204		24	0.372016
	25	348.865	376.929	183.506	357.016		-28.064		25	0.146128		25	0.332602
	26	363.802	377.101	183.312	363.064		-13.299		26	0.249658		26	0.323139
	27	372.647	389.364	185.136	390.394		-16.717		27	0.225692		27	0.296228
	28	375.31	379.377	182.674	390.051		-4.067		28	0.314392		28	0.287151
	29	370.758	379.714	178.57	407.716		-8.956		29	0.280111		29	0.254109
	30	358.873	369.685	171.887	396.458		-10.812		30	0.267097		30	0.239764
	31	345.833	355.302	177.167	391.405		-9.469		31	0.276514		31	0.264597
	32	357.815	359.089	174.729	385.744		-1.274		32	0.333976		32	0.260921
	33	349.786	353.237	172.967	374.565		-3.451		33	0.318711		33	0.265643
	34	348.361	355.091	166.248	382.33		-6.73		34	0.295719		34	0.230841
	35	344.115	341.899	169.506	388.406		2.216		35	0.358448		35	0.238021
	36	338.946	346.099	165.43	380.214		-7.153		36	0.292753		36	0.229524
	37	342.039	350.344	157.11	378.865		-8.305		37	0.284676		37	0.197336
	38	338.539	347.83	162.502	386.245		-9.291		38	0.277762		38	0.212695
	39	333.086	344.177	168.609	375.461		-11.091		39	0.26514		39	0.246919
	40	327.931	337.372	160.075	373.677		-9.441		40	0.27671		40	0.213705
	41	349.384	344.486	164.49	363.955		4.898		41	0.377253		41	0.241457
	42	330.455	337.554	155.463	360.066		-7.099		42	0.293132		42	0.206302
	43	315.83	325.639	148.035	344.617		-9.809		43	0.27413		43	0.186542
	44	323.241	330.43	152.146	350.354		-7.189		44	0.292501		44	0.200341
	45	329.827	337.239	153.272	342.567		-7.412		45	0.290937		45	0.212978
	46	328.432	332.728	148.219	344.839		-4.296		46	0.312786		46	0.187205
	47	331.115	333.239	152.502	341.104		-2.124		47	0.328016		47	0.210806
	48	324.005	328.807	150.655	353.439		-4.802		48	0.309238		48	0.190902
	49	350.394	348.765	157.816	353.947		1.629		49	0.354332		49	0.222445
	50	332.412	344.488	155.233	364.455		-12.076		50	0.258234		50	0.201459
	51	342.214	354.012	156.302	368.495		-11.798		51	0.260183		51	0.202528
	52	356.531	353.698	154.927	410.47		2.833		52	0.362774		52	0.167316
	53	336.398	341.286	148.196	376.083		-4.888		53	0.308635		53	0.163343
	54	355.392	350.284	150	373.332		5.108		54	0.378726		54	0.172604
	55	332.807	336.767	144.253	345.585		-3.96		55	0.315142		55	0.168161
	56	396.83	357.56	144.684	356.807		39.27		56	0.618266		56	0.161741
	57	411.5	356.798	138.327	356.47		54.702		57	0.726473		57	0.133912
	58	427.25	356.105	133.742	376.641		71.145		58	0.84177		58	0.10437
	59	444.561	358.427	131.77	336.887		86.134		59	0.946871		59	0.114894
	60	450.68	356.969	132.529	328.642		93.711		60	1		60	0.123483
	61	439.512	361.094	131.307	382.894		78.418		61	0.892767		61	0.0921611
	62	445.756	383.15	133.613	348.828		62.606		62	0.781895		62	0.117046
	63	435.622	364.382	130.906	321.918		71.24		63	0.842436		63	0.119353
	64	415.671	362.5	131.41	318.785		53.171		64	0.715738		64	0.124003
	65	404.848	349.245	132.426	329.543		55.603		65	0.732791		65	0.12241
	66	376.415	345.736	131.668	315.816		30.679		66	0.558027		66	0.127373
	67	399.933	357.627	131.949	338.203		42.306		67	0.639554		67	0.115027
	68	384.372	361.5	133.447	339.642		22.872		68	0.503285		68	0.121383
	69	336.262	332.664	126.574	292.824		3.598		69	0.368138		69	0.114074
	70	328.402	337.868	131.281	304.711		-9.466		70	0.276535		70	0.133254
	71	324.75	338.595	127.172	308.07		-13.845		71	0.24583		71	0.107666
	72	311.02	331.167	125.812	277.755		-20.147		72	0.201641		72	0.120551
	73	304.882	323.368	124.933	282.793		-18.486		73	0.213288		73	0.110823
	74	318.217	334.892	124.558	281.644		-16.675		74	0.225986		74	0.10919
	75	302.586	321.377	125.375	280.514		-18.791		75	0.211149		75	0.115438
	76	290.258	328.665	123.759	289.196		-38.407		76	0.0736038		76	0.0989912
	77	275.024	311.71	122.518	268.473		-36.686		77	0.0856712		77	0.104844
	78	284.589	315.795	126.098	279.152		-31.206		78	0.124096		78	0.121339
	79	295.306	335.159	127.545	291.777		-39.853		79	0.0634646		79	0.120814
	80	288.28	329.293	125.818	281.431		-41.013		80	0.0553308		80	0.117664
	81	283.758	315.777	124.204	278.964		-32.019		81	0.118396		81	0.108778
	82	284.856	310.168	125.847	287.949		-25.312		82	0.165424		82	0.112992
	83	280.212	306.652	123.92	258.686		-26.44		83	0.157515		83	0.123712
	84	280.697	309.859	124.584	271.861		-29.162		84	0.138429		84	0.116903
	85	272.439	305.424	124.781	272.036		-32.985		85	0.111622		85	0.118146
	86	278.205	310.152	123.591	275.555		-31.947		86	0.118901		86	0.107114
	87	285.303	312.391	125.934	298.219		-27.088		87	0.152971		87	0.106611
	88	293.402	323.587	124.504	291.818		-30.185		88	0.131255		88	0.101991
	89	286.432	315.375	125.35	308.46		-28.943		89	0.139964		89	0.0972207
	90	278.924	309.625	125.102	304.657		-30.701		90	0.127637		90	0.0979176
	91	292.856	323.543	124.307	309.277		-30.687		91	0.127736		91	0.0909598
	92	296.409	332.283	124.109	311.204		-35.874		92	0.0913649		92	0.0888998
	93	293.439	326.016	124.168	298.007		-32.577		93	0.114483		93	0.0962341
	94	291.417	322.022	125.438	364.803		-30.605		94	0.12831		94	0.0742665
	95	276.345	311.07	122.485	275.454		-34.725		95	0.0994215		95	0.0995847
	96	276.129	320.843	123.969	305.979		-44.714		96	0.0293798		96	0.0907438
	97	275.853	314.924	123.567	295.155		-39.071		97	0.0689479		97	0.0942569
	98	280.603	317.814	124.062	298.948		-37.211		98	0.08199		98	0.0950707
	99	276.422	309.244	125.041	288.103		-32.822		99	0.112765		99	0.107784
	100	272.952	299.108	122.321	274.786		-26.156		100	0.159506		100	0.0989115
	101	272.935	296.562	121.241	254.116		-23.627		101	0.177239		101	0.106682
	102	268.008	294.307	123.446	270.393		-26.299		102	0.158504		102	0.11002
	103	283.016	313.409	124.982	281.42		-30.393		103	0.129797		103	0.112152
	104	279.145	311.028	124.429	274.152		-31.883		104	0.119349		104	0.11397
	105	271.612	302.541	121.219	277.938		-30.929		105	0.126039		105	0.089355
	106	268.362	301.773	123.711	281.454		-33.411		106	0.108635		106	0.103734
	107	268.181	300.227	124	279.34		-32.046		107	0.118206		107	0.107138
	108	278.922	314.814	124.66	294.423		-35.892		108	0.0912386		108	0.101324
	109	266.534	301.977	123.825	290.134		-35.443		109	0.094387		109	0.0988235
	110	269.043	308.116	123.515	290.485		-39.073		110	0.0689338		110	0.0966757

## Sheet: exp1-endosome9
endosome 9							dMFI		%dMFI				background-adjusted
	frame #	Rab5(rim)	Rab5(background)	YFP(lumen)	CFP(lumen)		Rab5		frame #	Rab5		frame #	YFP/CFP		YFP background	CFP background
	1	419.681	446.039	216.545	501.216		-26.358		1	0.0992333		1	0.292404		108	130
	2	438.519	463.535	212.762	496.395		-25.016		2	0.106727		2	0.285926
	3	448.804	478.028	218.249	488.196		-29.224		3	0.0832296		3	0.30779
	4	438.588	461.799	204.426	482.202		-23.211		4	0.116806		4	0.27378
	5	445.055	465.981	206.007	463.998		-20.926		5	0.129566		5	0.293436
	6	439.217	456.386	203.44	453.834		-17.169		6	0.150545		6	0.294719
	7	447.154	471.287	209.075	456.588		-24.133		7	0.111658		7	0.309488
	8	445.125	471.321	209.661	449.141		-26.196		8	0.100138		8	0.318546
	9	442.82	471.136	197.922	467.947		-28.316		9	0.0882998		9	0.266083
	10	459.485	492.164	202.144	486.168		-32.679		10	0.0639368		10	0.264325
	11	464.682	490.274	198.487	455.582		-25.592		11	0.103511		11	0.277924
	12	441.107	471.241	202.349	445.555		-30.134		12	0.0781481		12	0.298994
	13	467.625	471.521	202.135	463.764		-3.896		13	0.224661		13	0.282041
	14	431.086	458.203	199.065	426.741		-27.117		14	0.0949951		14	0.306884
	15	449.096	472.302	210.385	451.022		-23.206		15	0.116834		15	0.318935
	16	443.904	466.899	207.2	445.03		-22.995		16	0.118012		16	0.314891
	17	442.438	463.531	210.184	471.041		-21.093		17	0.128633		17	0.299624
	18	447.299	477.402	215.492	457.793		-30.103		18	0.0783212		18	0.327926
	19	432.473	452.766	215.393	447.345		-20.293		19	0.1331		19	0.338411
	20	434.591	449.68	211.381	433.136		-15.089		20	0.162159		20	0.341038
	21	436.087	453.921	211.506	435.577		-17.834		21	0.146831		21	0.338723
	22	422.106	441.209	203.096	404.416		-19.103		22	0.139745		22	0.34654
	23	416.711	449.346	200.49	414.915		-32.635		23	0.0641825		23	0.324623
	24	415.098	442.256	199.491	420.323		-27.158		24	0.0947661		24	0.315135
	25	438.238	456.122	208.705	462.303		-17.884		25	0.146552		25	0.303052
	26	429.69	453.796	183.934	460.966		-24.106		26	0.111808		26	0.229431
	27	430.725	448.483	190.203	477.849		-17.758		27	0.147256		27	0.236318
	28	427.816	442.828	181.654	453.477		-15.012		28	0.162589		28	0.227695
	29	427.492	453.497	177.505	454.733		-26.005		29	0.101204		29	0.214037
	30	416.961	434.809	176.972	438.883		-17.848		30	0.146753		30	0.223295
	31	421.478	431.149	177.237	436.745		-9.671		31	0.192414		31	0.225715
	32	425.259	436.906	178.709	440.961		-11.647		32	0.18138		32	0.227389
	33	424.612	442.355	176.358	435.686		-17.743		33	0.14734		33	0.223622
	34	432.355	437.243	176.443	449.754		-4.888		34	0.219122		34	0.214049
	35	442.843	445.169	182.549	458.953		-2.326		35	0.233428		35	0.226625
	36	438.163	453.136	181.826	468.822		-14.973		36	0.162807		36	0.21789
	37	446.17	459.02	181.067	459.105		-12.85		37	0.174662		37	0.222017
	38	439.365	451.125	191.862	446.219		-11.76		38	0.180749		38	0.265202
	39	431.935	444.758	188.728	429.957		-12.823		39	0.174813		39	0.269132
	40	435.13	437.665	184.198	410.112		-2.535		40	0.232261		40	0.272027
	41	427.543	448.892	181.67	391.347		-21.349		41	0.127204		41	0.281886
	42	424.12	426.129	174.221	395.946		-2.009		42	0.235198		42	0.249002
	43	610	475.046	165.61	458.908		134.954		43	1		43	0.175155
	44	519.755	441.792	159.387	436.415		77.963		44	0.681762		44	0.167704
	45	522.642	452.698	152.386	404.614		69.944		45	0.636984		45	0.161631
	46	540.301	447.366	153.589	389.623		92.935		46	0.765366		46	0.175597
	47	520.949	440.866	155.215	392.522		80.083		47	0.6936		47	0.179852
	48	511.631	443.181	158.665	406.354		68.45		48	0.628641		48	0.183334
	49	534.205	465.97	164.209	442.563		68.235		49	0.627441		49	0.179833
	50	521.198	462.469	161.055	463.604		58.729		50	0.574359		50	0.159036
	51	512.68	461.42	162.024	458.631		51.26		51	0.532652		51	0.164391
	52	497.28	453.273	164.156	450.887		44.007		52	0.492152		52	0.175002
	53	522.058	462.344	166.089	414.123		59.714		53	0.57986		53	0.20445
	54	459.106	473.348	163.511	398.073		-14.242		54	0.166889		54	0.207074
	55	425.612	465.451	161.736	385.337		-39.839		55	0.0239554		55	0.210451
	56	442.917	457	161.051	405.478		-14.083		56	0.167777		56	0.192578
	57	415.8	444.431	159.613	400.513		-28.631		57	0.0865409		57	0.190797
	58	406.032	435.703	158.742	412.796		-29.671		58	0.0807335		58	0.17943
	59	388.967	414.657	151.048	422.606		-25.69		59	0.102963		59	0.147119
	60	392.941	420.706	154.471	396.24		-27.765		60	0.0913766		60	0.174546
	61	392.513	415.892	155.433	415.019		-23.379		61	0.115868		61	0.16642
	62	398.875	430.63	157.989	417.164		-31.755		62	0.0690965		62	0.174078
	63	392.41	427.235	150.706	393.034		-34.825		63	0.0519536		63	0.162359
	64	377.561	421.69	152.547	389.328		-44.129		64	0		64	0.171779
	65	368.341	406.679	155.511	392.737		-38.338		65	0.032337		65	0.180831
	66	364.932	399.495	154.898	381.635		-34.563		66	0.0534166		66	0.186373

[truncated: 35 more sheets: exp1-endosome10, exp1-endosome11, exp1-endosome12, exp1-endosome13, exp1-endosome14, exp1-endosome15, exp1-endosome16, exp1-endosome17, exp1-endosome18, exp1-endosome19, exp1-time, exp1-aligned, exp2-background, exp2-endosome1, exp2-endosome2, exp2-endosome3, exp2-endosome4, exp2-endosome5, exp2-endosome6, exp2-endosome7 …]
