# Supplementary material for: A novel live-cell imaging assay reveals regulation of endosome maturation
Source: eLife. 2021 Nov 30;10:e70982. doi: 10.7554/eLife.70982 (PMC8635980; doi:10.7554/eLife.70982)
Supplement: Figure 11—source data 2. [file elife-70982-fig11-data2.xlsx]

## Sheet: exp1-endosome1
endosome 1							dMFI		%dMFI				background-adjusted
	frame #	Rab7(rim)	Rab7(background)	YFP(lumen)	CFP(lumen)		Rab7		frame #	Rab7		frame #	YFP/CFP		YFP background	CFP background
	1	271.439	295.42	208.945	324.466		-23.981		1	0.0464139		1	0.519088		108	130
	2	267.652	297.021	204.11	315.548		-29.369		2	0.000687425		2	0.517979
	3	267.853	296.208	195.705	311.731		-28.355		3	0.00929297		3	0.482609
	4	263.757	286.49	187.904	299.893		-22.733		4	0.0570054		4	0.47032
	5	263.289	287.162	187.538	301.928		-23.873		5	0.0473305		5	0.462624
	6	265.914	287.26	187.495	307.278		-21.346		6	0.0687765		6	0.44842
	7	256.447	280.707	182.903	310.231		-24.26		7	0.0440461		7	0.415594
	8	265.218	285.538	183.293	309.156		-20.32		8	0.0774839		8	0.420265
	9	266.684	291.574	180.255	302.428		-24.89		9	0.0386995		9	0.419044
	10	260.833	279.09	180.227	322.449		-18.257		10	0.094992		10	0.375305
	11	264.353	286.099	184.413	323.729		-21.746		11	0.0653818		11	0.394432
	12	248.02	270.755	177.833	298.384		-22.735		12	0.0569884		12	0.414725
	13	251.204	276.814	177.962	302.062		-25.61		13	0.032589		13	0.406609
	14	254.763	276.132	175.582	296.303		-21.369		14	0.0685813		14	0.406379
	15	258.586	279.515	175.971	305.149		-20.929		15	0.0723154		15	0.388075
	16	256.77	275.706	172.091	286.562		-18.936		16	0.0892295		16	0.409365
	17	262.564	275.278	172.929	295.92		-12.714		17	0.142034		17	0.391327
	18	269.974	280.594	172.6	294.031		-10.62		18	0.159805		18	0.393828
	19	267.647	283.736	173.031	296.009		-16.089		19	0.113391		19	0.391732
	20	267.66	281.858	165.329	283.147		-14.198		20	0.12944		20	0.37434
	21	262.09	274.222	165.049	280.693		-12.132		21	0.146973		21	0.378578
	22	252.872	266.283	161.253	271.867		-13.411		22	0.136119		22	0.375373
	23	257.147	267.151	160.053	271.591		-10.004		23	0.165033		23	0.367629
	24	252.891	264.462	157.898	272.378		-11.571		24	0.151734		24	0.350461
	25	261.705	276.226	164.591	293.729		-14.521		25	0.126698		25	0.345638
	26	266.442	284.302	164.24	288.791		-17.86		26	0.0983612		26	0.354176
	27	263.41	281.868	163.911	291.929		-18.458		27	0.0932861		27	0.345281
	28	251.474	274.123	163.329	282.08		-22.649		28	0.0577183		28	0.363815
	29	252.083	281.533	163.276	285.298		-29.45		29	0		29	0.355935
	30	244.096	265.906	155.258	269.529		-21.81		30	0.0648386		30	0.338697
	31	255.846	269.896	154.956	267.218		-14.05		31	0.130696		31	0.3422
	32	253.604	267.427	157.484	290.656		-13.823		32	0.132622		32	0.308012
	33	259.829	266.4	154.238	277.375		-6.571		33	0.194168		33	0.313744
	34	264.186	277.368	155.467	280.453		-13.182		34	0.138062		34	0.315494
	35	256.724	267.608	153.551	266.64		-10.884		35	0.157565		35	0.333365
	36	257.942	263.033	154.284	278.458		-5.091		36	0.206728		36	0.311765
	37	258.077	263.325	153.347	286.987		-5.248		37	0.205396		37	0.288858
	38	259.538	270.995	155.613	294.249		-11.457		38	0.152702		38	0.289883
	39	258.615	268.175	152.124	283.591		-9.56		39	0.168801		39	0.287282
	40	268.199	271.736	152.213	280.693		-3.537		40	0.219917		40	0.293398
	41	275.288	275.519	148.524	287.404		-0.231		41	0.247974		41	0.257452
	42	271.799	266.377	143.867	283.105		5.422		42	0.295949		42	0.234264
	43	281.652	270.691	141.336	292.555		10.961		43	0.342957		43	0.205075
	44	300.043	281.755	139.629	292.277		18.288		44	0.40514		44	0.194907
	45	297.165	271.741	136.227	277.332		25.424		45	0.465701		45	0.191588
	46	308.017	271.469	137.693	285.633		36.548		46	0.560107		46	0.190789
	47	328.773	282.254	139.977	282.183		46.519		47	0.644728		47	0.210122
	48	345.07	289.763	139.942	282.181		55.307		48	0.71931		48	0.209895
	49	366.625	291.855	141.193	289.88		74.77		49	0.884487		49	0.207612
	50	381.222	292.841	144.241	299.677		88.381		50	1		50	0.213588
	51	378.244	296.996	137.402	287.462		81.248		51	0.939464		51	0.186724
	52	364.924	295.237	139.792	279.413		69.687		52	0.841349		52	0.212779
	53	360.274	296.027	137.752	275.62		64.247		53	0.795181		53	0.204313
	54	332.143	282.478	137.774	275.069		49.665		54	0.671428		54	0.20524
	55	338.744	281.442	133.701	270.522		57.302		55	0.736241		55	0.182897
	56	336.375	280.647	134.219	272.077		55.728		56	0.722883		56	0.184541
	57	332.095	285.304	132.602	270.376		46.791		57	0.647037		57	0.175258
	58	304.256	282.25	130.004	260.822		22.006		58	0.436693		58	0.168198
	59	299.675	275.866	127.651	253.122		23.809		59	0.451995		59	0.159606
	60	301.045	280.745	128.222	259.804		20.3		60	0.422215		60	0.155789
	61	304.654	279.392	129.604	271.196		25.262		61	0.464326		61	0.153007
	62	309.474	284.693	129.533	265.276		24.781		62	0.460244		62	0.159178
	63	295.494	278.915	129.276	260.871		16.579		63	0.390636		63	0.162572
	64	304.346	281.505	133.916	271.467		22.841		64	0.44378		64	0.183195
	65	305.09	278.047	127.898	269.169		27.043		65	0.479441		65	0.142977
	66	294.872	278.071	132.018	274.529		16.801		66	0.39252		66	0.166181
	67	301.314	281.08	132.516	284.911		20.234		67	0.421655		67	0.158259
	68	293.393	288.478	131.115	287.825		4.915		68	0.291647		68	0.14646
	69	287.178	274.103	129.812	278.462		13.075		69	0.360898		69	0.14692
	70	282.296	274.642	130.582	265.851		7.654		70	0.314892		70	0.166226
	71	278.974	261.928	129.259	260.028		17.046		71	0.394599		71	0.163496
	72	267.849	261.152	128.582	257.577		6.697		72	0.30677		72	0.16133
	73	266.322	256.201	128.202	250.495		10.121		73	0.335828		73	0.167658
	74	280.329	264.652	126.639	264.077		15.677		74	0.382981		74	0.139017
	75	287.361	277.355	126.056	278.333		10.006		75	0.334852		75	0.121726
	76	271.632	271.675	130.424	258.819		-0.043		76	0.249569		76	0.174074
	77	251.6	260.492	128.329	251.133		-8.892		77	0.17447		77	0.167824
	78	267.179	268.721	130.534	254.441		-1.542		78	0.236848		78	0.181082
	79	294.866	262.131	126.041	279.813		32.735		79	0.527747		79	0.120423
	80	288.051	264.796	133.991	299.704		23.255		80	0.447293		80	0.153155
	81	287.804	261.495	129.577	281.117		26.309		81	0.473212		81	0.142783
	82	286.112	265.828	131.733	284.719		20.284		82	0.422079		82	0.153394
	83	259.84	254.31	126.214	265.459		5.53		83	0.296866		83	0.134461
	84	264.284	258.772	129.425	277.543		5.512		84	0.296713		84	0.145212
	85	250.909	253.574	129.376	274.606		-2.665		85	0.227317		85	0.147822
	86	265.929	252.097	129.391	272.032		13.832		86	0.367323		86	0.150607
	87	250.258	251.331	127.854	266.369		-1.073		87	0.240828		87	0.14559
	88	263.45	249.15	129.669	276.579		14.3		88	0.371294		88	0.147832
	89	247.248	247.127	129.091	270.838		0.121		89	0.250961		89	0.149754
	90	259.079	253.297	129.53	273.581		5.782		90	0.299005		90	0.14995
	91	254.492	252.04	130.176	272.965		2.452		91	0.270744		91	0.155115
	92	263.817	258.977	127.972	269.028		4.84		92	0.29101		92	0.143655
	93	258.52	255.916	129.32	292.92		2.604		93	0.272034		93	0.130862
	94	257.248	257.162	131.114	294.636		0.086		94	0.250664		94	0.140395
	95	240.864	242.458	129.844	283.117		-1.594		95	0.236406		95	0.142662
	96	242.074	244.402	133.033	285.541		-2.328		96	0.230177		96	0.160941
	97	245.204	236.646	131.225	271.972		8.558		97	0.322564		97	0.163589
	98	252.701	254.528	132.422	275.406		-1.827		98	0.234429		98	0.167957
	99	250.786	257.701	131.519	289.796		-6.915		99	0.191248		99	0.147181
	100	246.667	249.549	129.055	285.726		-2.882		100	0.225475		100	0.135205

## Sheet: exp1-endosome2
endosome 2							dMFI		%dMFI				background-adjusted
	frame #	Rab7(rim)	Rab7(background)	YFP(lumen)	CFP(lumen)		Rab7		frame #	Rab7		frame #	YFP/CFP		YFP background	CFP background
	1	238.242	243.54	227.759	325.08		-5.298		1	0.181366		1	0.613897		108	130
	2	244.871	244.978	225.788	333.109		-0.107		2	0.231242		2	0.579925
	3	245.189	247.848	217.569	328.387		-2.659		3	0.206722		3	0.552299
	4	242.765	245.707	207.533	311.343		-2.942		4	0.204003		4	0.548866
	5	239.674	247.652	209.146	309.153		-7.978		5	0.155616		5	0.564579
	6	238.727	248.06	207.701	320.146		-9.333		6	0.142596		6	0.524339
	7	242.098	251.94	207.423	320.336		-9.842		7	0.137706		7	0.522355
	8	246.72	254.44	211.504	322.934		-7.72		8	0.158094		8	0.536474
	9	252.924	265.413	207.496	328.876		-12.489		9	0.112273		9	0.500292
	10	253.637	268.932	204.955	330.893		-15.295		10	0.0853118		10	0.48262
	11	258.371	269.68	210.144	320.361		-11.309		11	0.12361		11	0.53658
	12	245.75	261.709	194.485	299.959		-15.959		12	0.0789319		12	0.508858
	13	238.875	258.933	194.395	318.629		-20.058		13	0.0395476		13	0.458015
	14	247.03	264.114	191.642	321.08		-17.084		14	0.0681226		14	0.437733
	15	251.598	271.06	193.431	323.299		-19.462		15	0.0452742		15	0.441963
	16	244.364	268.538	189.277	309.876		-24.174		16	0		16	0.45185
	17	249.629	269.625	192.146	312.504		-19.996		17	0.0401434		17	0.461064
	18	257.432	274.576	189.307	315.657		-17.144		18	0.0675461		18	0.437942
	19	264.331	271.146	197.519	333.782		-6.815		19	0.16679		19	0.439288
	20	263.309	270.458	186.795	313.558		-7.149		20	0.163581		20	0.429265
	21	258.654	263.141	183.288	308.481		-4.487		21	0.189158		21	0.421826
	22	249.713	260.396	178.609	304.667		-10.683		22	0.129625		22	0.404249
	23	254.485	262.026	178.923	300.013		-7.541		23	0.159814		23	0.417162
	24	255.39	262.38	177.032	309.135		-6.99		24	0.165109		24	0.385363
	25	266.684	270.781	193.942	344.333		-4.097		25	0.192905		25	0.400974
	26	270.676	272.016	185.212	330.91		-1.34		26	0.219395		26	0.384311
	27	276.904	267.224	182.705	340.359		9.68		27	0.325278		27	0.355131
	28	261.22	265.19	177.803	329.876		-3.97		28	0.194126		28	0.349232
	29	262.947	263.09	180.603	335.699		-0.143		29	0.230896		29	0.352957
	30	257.455	253.059	170.699	300.397		4.396		30	0.274508		30	0.367958
	31	266.765	267.272	167.971	297.27		-0.507		31	0.227399		31	0.358528
	32	276.258	268.798	174.452	320.363		7.46		32	0.303948		32	0.34908
	33	269.129	269.598	166.467	301.358		-0.469		33	0.227764		33	0.341198
	34	287.106	282.163	169.241	317.847		4.943		34	0.279764		34	0.326015
	35	264.816	259.495	167.417	312.468		5.321		35	0.283396		35	0.32563
	36	263.684	257.724	166.449	318.731		5.96		36	0.289536		36	0.309695
	37	267.515	262.894	167.897	330.507		4.621		37	0.27667		37	0.298728
	38	284.917	268.212	169.577	342.445		16.705		38	0.392777		38	0.289849
	39	275.32	269.117	165.685	333.677		6.203		39	0.29187		39	0.283218
	40	271.242	268.63	161.518	316.073		2.612		40	0.257367		40	0.287618
	41	293	280.125	162.942	321.058		12.875		41	0.355977		41	0.287567
	42	290.162	264.865	159.192	307.814		25.297		42	0.475331		42	0.287896
	43	303.493	271.735	156.045	316.503		31.758		43	0.53741		43	0.25761
	44	319.062	284.775	155.068	321.282		34.287		44	0.561709		44	0.246066
	45	314.861	278.82	154.475	300.768		36.041		45	0.578562		45	0.272153
	46	317.201	284.61	157.412	302.605		32.591		46	0.545413		46	0.286272
	47	356.639	297.215	153.424	294.446		59.424		47	0.803232		47	0.276224
	48	364.167	299.785	154.266	305.305		64.382		48	0.85087		48	0.263917
	49	384.243	314.68	156.39	317.26		69.563		49	0.90065		49	0.258411
	50	388.868	308.965	154.367	309.842		79.903		50	1		50	0.257821
	51	351.188	302.515	152.09	302.723		48.673		51	0.699934		51	0.255264
	52	347.868	291.32	150.678	299.175		56.548		52	0.775599		52	0.252271
	53	349.097	292.98	152.249	299.141		56.117		53	0.771458		53	0.26161
	54	336.042	286.37	149.904	291.65		49.672		54	0.709532		54	0.259227
	55	333.625	285.13	146.103	287.692		48.495		55	0.698223		55	0.241629
	56	328.412	290.25	145.615	282.276		38.162		56	0.598941		56	0.247019
	57	327.382	279.198	143.519	283.474		48.184		57	0.695235		57	0.231433
	58	318.382	272.927	139.878	268.763		45.455		58	0.669014		58	0.22973
	59	293.257	266.865	139.891	262.462		26.392		59	0.485852		59	0.240756
	60	287.772	262.193	138.545	270.429		25.579		60	0.47804		60	0.217512
	61	284.544	259.359	142.923	272.09		25.185		61	0.474255		61	0.245781
	62	285.493	268.786	141.609	271.923		16.707		62	0.392796		62	0.236812
	63	284.184	261.526	138.301	259.269		22.658		63	0.449975		63	0.234403
	64	287.574	264.896	143.571	273.096		22.678		64	0.450167		64	0.248581
	65	282.36	260.458	138.397	266.288		21.902		65	0.442711		65	0.223035
	66	290.11	262.104	138.41	270.532		28.006		66	0.50136		66	0.216392
	67	300.934	270.63	143.372	293.295		30.304		67	0.523439		67	0.216614
	68	306.375	274.078	144.885	292.25		32.297		68	0.542589		68	0.227334
	69	298.25	279.44	142.372	293.489		18.81		69	0.413002		69	0.21024
	70	303.144	282.891	140.993	285.19		20.253		70	0.426867		70	0.212597
	71	288.212	265.532	137.479	276.096		22.68		71	0.450186		71	0.201778
	72	271.667	259.41	137.87	264.801		12.257		72	0.350039		72	0.221586
	73	274.273	260.918	138.212	271.343		13.355		73	0.360589		73	0.21375
	74	271.469	266.4	137.782	267.008		5.069		74	0.280975		74	0.217374
	75	280.477	277.489	141.879	288.71		2.988		75	0.26098		75	0.213465
	76	279.312	276.783	139.75	273.532		2.529		76	0.25657		76	0.221205
	77	268.516	258.383	134.556	256.968		10.133		77	0.329631		77	0.209155
	78	276.984	275.8	136.718	258.871		1.184		78	0.243647		78	0.222843
	79	281.177	276.216	138.491	285.25		4.961		79	0.279937		79	0.196399
	80	282.444	277.602	142.116	300.67		4.842		80	0.278794		80	0.199895
	81	273.266	270.46	138.911	277.089		2.806		81	0.259231		81	0.210152
	82	283.153	278.841	138.839	285.107		4.312		82	0.273701		82	0.198824
	83	252.129	254.653	137.536	263.786		-2.524		83	0.208019		83	0.22077
	84	260.24	262.353	139.562	283.219		-2.113		84	0.211968		84	0.205993
	85	248.75	259.974	141.828	282.172		-11.224		85	0.124427		85	0.222301

## Sheet: exp1-endosome3
endosome 3							dMFI		%dMFI				background-adjusted
	frame #	Rab7(rim)	Rab7(background)	YFP(lumen)	CFP(lumen)		Rab7		frame #	Rab7		frame #	YFP/CFP		YFP background	CFP background
	1	218.53	214.259	385.386	959.922		4.271		1	0.0785693		1	0.334231		108	130
	2	218.28	218.822	367.295	928.264		-0.542		2	0		2	0.324824
	3	222.312	218.854	371.617	944.948		3.458		3	0.0652976		3	0.323477
	4	218.39	213.567	348.741	892.973		4.823		4	0.0875804		4	0.31553
	5	226.696	216.702	341.796	900.963		9.994		5	0.171994		5	0.303252
	6	228.382	218.149	326.747	861.346		10.233		6	0.175895		6	0.299102
	7	239.303	218.706	324.718	876.318		20.597		7	0.345081		7	0.290383
	8	240.898	220.238	314.009	917.039		20.66		8	0.34611		8	0.261752
	9	247.12	224.571	318.798	928.503		22.549		9	0.376947		9	0.263991
	10	258.835	231.285	296.158	930.215		27.55		10	0.458585		10	0.235134
	11	269.065	242.262	303.574	1004.22		26.803		11	0.446391		11	0.223712
	12	266.503	236.308	274.94	1021.1		30.195		12	0.501763		12	0.187342
	13	275.836	236.241	260.087	1124.53		39.595		13	0.655212		13	0.152924
	14	280.484	221.133	263.157	1204.06		59.351		14	0.977717		14	0.144458
	15	287.284	226.568	266.195	1254.01		60.716		15	1		15	0.140742
	16	280.207	228.272	260.125	1215.58		51.935		16	0.856655		16	0.140133
	17	287.042	230.475	252.822	1224.02		56.567		17	0.93227		17	0.132376
	18	296.341	251.008	251.888	1272.39		45.333		18	0.748882		18	0.125953
	19	282.692	233.374	258.506	1371.31		49.318		19	0.813935		19	0.121248
	20	284.547	230.092	245.328	1330.72		54.455		20	0.897793		20	0.114371
	21	276.883	223.008	245.511	1330.09		53.875		21	0.888325		21	0.114584
	22	274.335	229.34	237.286	1246.15		44.995		22	0.743364		22	0.115832
	23	271.447	218.202	237.871	1295.87		53.245		23	0.87804		23	0.111394
	24	268.358	221.622	232.244	1309.31		46.736		24	0.771785		24	0.105353
	25	270.987	226.942	251.28	1454.42		44.045		25	0.727856		25	0.108183
	26	270.801	232.896	247.062	1374.11		37.905		26	0.627624		26	0.111776
	27	262.978	225.783	243.373	1382.97		37.195		27	0.616034		27	0.108042
	28	257.795	218.527	239.653	1362.45		39.268		28	0.649874		28	0.106823
	29	266.136	226.489	235.832	1388.21		39.647		29	0.656061		29	0.101598
	30	255.45	225.211	231.777	1305.96		30.239		30	0.502481		30	0.105256
	31	255.833	222.244	226.651	1279.29		33.589		31	0.557168		31	0.103238
	32	257.023	222.621	232.834	1409.94		34.402		32	0.57044		32	0.0975312
	33	257.887	221.584	229.958	1335.57		36.303		33	0.601472		33	0.101162
	34	256.389	227.415	241.43	1392.73		28.974		34	0.481831		34	0.105668
	35	239.726	215.639	231.92	1274.99		24.087		35	0.402054		35	0.108228
	36	242.068	215.162	235.04	1323.54		26.906		36	0.448072		36	0.10644
	37	250.935	220.753	236.404	1368.69		30.182		37	0.501551		37	0.103661
	38	243.284	218.822	245.874	1433.57		24.462		38	0.408175		38	0.105767
	39	234.674	215.847	243.119	1372.59		18.827		39	0.316187		39	0.10874
	40	232.014	208.337	236.28	1335.11		23.677		40	0.395361		40	0.106447
	41	238.627	217.314	234.227	1397.21		21.313		41	0.35677		41	0.0996102
	42	227.147	209.663	231.259	1355.52		17.484		42	0.294264		42	0.100577
	43	230.226	210.486	236.27	1422.26		19.74		43	0.331091		43	0.0992602
	44	222.997	210.488	228.206	1408.12		12.509		44	0.21305		44	0.0940491
	45	216.38	206.379	228.743	1327.5		10.001		45	0.172108		45	0.100829
	46	218.13	204.259	232.686	1431.41		13.871		46	0.235284		46	0.0958083
	47	221.368	206.652	229.495	1421.4		14.716		47	0.249078		47	0.09408
	48	227.196	213.886	231.087	1461.08		13.31		48	0.226126		48	0.0924718
	49	234.149	214.714	238.114	1508.7		19.435		49	0.326113		49	0.0943743
	50	230.82	214.756	246.165	1567.01		16.064		50	0.271083		50	0.0961475
	51	229.463	213.68	236.665	1496.21		15.783		51	0.266496		51	0.0941764
	52	228.007	212.329	238.034	1503.62		15.678		52	0.264782		52	0.0946653
	53	228.033	215.25	235.933	1478.97		12.783		53	0.217523		53	0.0948378
	54	218.346	209.633	244.411	1515.37		8.713		54	0.151082		54	0.0984654
	55	215.419	205.08	240.557	1477.35		10.339		55	0.177626		55	0.0983837
	56	219.029	208.799	240.636	1523.05		10.23		56	0.175846		56	0.0952124
	57	216.129	208.059	233.451	1432.72		8.07		57	0.140586		57	0.0962991
	58	213.466	202.684	229.495	1403.65		10.782		58	0.184857		58	0.0953911
	59	215.262	205.792	224.795	1393.54		9.47		59	0.16344		59	0.0924345
	60	230.31	214.86	258.955	1760.04		15.45		60	0.26106		60	0.0926083

## Sheet: exp1-endosome4
endosome 4							dMFI		%dMFI				background-adjusted
	frame #	Rab7(rim)	Rab7(background)	YFP(lumen)	CFP(lumen)		Rab7		frame #	Rab7		frame #	YFP/CFP		YFP background	CFP background
	1	204.992	214.984	409.343	1325.23		-9.992		1	0.100152		1	0.252122		108	130
	2	201.432	210.033	394.533	1129.68		-8.601		2	0.128711		2	0.286625
	3	204.008	210.418	411.051	1121.25		-6.41		3	0.173695		3	0.305727
	4	196.121	205.364	377.358	1034.15		-9.243		4	0.11553		4	0.297912
	5	193.659	201.103	361.109	994.577		-7.444		5	0.152466		5	0.292755
	6	189.515	198.272	352.168	914.139		-8.757		6	0.125508		6	0.311384
	7	193.295	204.587	335.927	1004.11		-11.292		7	0.0734612		7	0.260754
	8	189.765	199.473	334.431	989.212		-9.708		8	0.105983		8	0.263533
	9	190.25	201.658	346.299	996.891		-11.408		9	0.0710795		9	0.274889
	10	188.75	201.217	330.891	1025.91		-12.467		10	0.0493368		10	0.248787
	11	194.773	206.109	349.387	1089.43		-11.336		11	0.0725578		11	0.251594
	12	187.076	201.946	327.219	1033.06		-14.87		12	0		12	0.242752
	13	193.114	206.549	334.387	964.19		-13.435		13	0.0294625		13	0.271385
	14	191.886	203.766	336.628	1051.66		-11.88		14	0.0613887		14	0.248062
	15	196.25	207.364	344.504	1047.06		-11.114		15	0.0771158		15	0.257894
	16	201.853	206.964	343.654	1037.44		-5.111		16	0.200365		16	0.25969
	17	209.669	210.281	339.494	1063.93		-0.612		17	0.292736		17	0.247871
	18	226.404	224.281	347.609	1072.93		2.123		18	0.348889		18	0.254111
	19	219.157	212.75	355.428	1036.52		6.407		19	0.436846		19	0.272941
	20	219.896	215.03	327.91	998.328		4.866		20	0.405207		20	0.253257
	21	218.049	211.8	330.616	988.831		6.249		21	0.433602		21	0.259208
	22	222.868	216.765	313.616	896.548		6.103		22	0.430604		22	0.268236
	23	217.451	210.56	317.22	925.045		6.891		23	0.446783		23	0.263155
	24	217.829	211.064	320.625	908.433		6.765		24	0.444196		24	0.273145
	25	239.542	222.36	356.232	1107.07		17.182		25	0.658071		25	0.254058
	26	240.924	228.02	339.655	1070.98		12.904		26	0.570238		26	0.246186
	27	232.604	219.55	317.282	1036.39		13.054		27	0.573317		27	0.230896
	28	237.139	215.56	313.469	1081.04		21.579		28	0.748347		28	0.216047
	29	241.785	222.775	300.113	1062.77		19.01		29	0.695602		29	0.20596
	30	244.434	224.667	283.141	1107.95		19.767		30	0.711144		30	0.179089
	31	251.028	222.01	276.949	1138.74		29.018		31	0.90108		31	0.167485
	32	247.007	222.872	287.964	1322.64		24.135		32	0.800825		32	0.150895
	33	259.646	225.81	281.435	1451.42		33.836		33	1		33	0.131249
	34	256.424	222.685	291.678	1472.86		33.739		34	0.998008		34	0.136781
	35	242.574	218.734	263.731	1404.59		23.84		35	0.794769		35	0.122181
	36	248.522	219.859	272.994	1435.56		28.663		36	0.893791		36	0.126378
	37	247.493	221.562	271.571	1433.81		25.931		37	0.8377		37	0.125456
	38	255.191	223.526	286.404	1614		31.665		38	0.955426		38	0.120218
	39	252.39	219.802	281.853	1552.25		32.588		39	0.974377		39	0.122238
	40	239.36	214.99	262.526	1465.54		24.37		40	0.80565		40	0.115703
	41	247.684	215.542	266.949	1528.23		32.142		41	0.96522		41	0.113679
	42	238.449	209.203	261.064	1441.29		29.246		42	0.905761		42	0.116728
	43	245.258	216.479	253.082	1494.8		28.779		43	0.896173		43	0.106303
	44	233.644	211.649	249.644	1497.73		21.995		44	0.756888		44	0.103562
	45	221.636	209.181	244.596	1421.01		12.455		45	0.561019		45	0.105806
	46	226.682	209.176	251.582	1532.8		17.506		46	0.664723		46	0.102354
	47	222.205	205.606	245.336	1475.08		16.599		47	0.646101		47	0.102102
	48	233.955	213.576	248.248	1455.07		20.379		48	0.72371		48	0.105842
	49	234.644	212.071	251.803	1432.31		22.573		49	0.768755		49	0.110422
	50	236.598	211.815	273.35	1540.07		24.783		50	0.81413		50	0.117263
	51	231.894	204.783	258.073	1392.17		27.111		51	0.861927		51	0.1189
	52	238.894	211.543	255.65	1412.28		27.351		52	0.866854		52	0.115147
	53	237.144	213.364	254.066	1426.27		23.78		53	0.793537		53	0.112682
	54	229.326	208.668	261.691	1385.96		20.658		54	0.729438		54	0.122369
	55	219.409	204.359	257.794	1332.82		15.05		55	0.614298		55	0.124535
	56	224.648	208.2	267.645	1425.46		16.448		56	0.643001		56	0.123234
	57	221.594	205.117	258.419	1361.55		16.477		57	0.643596		57	0.122138
	58	218.906	203.306	253.806	1392.22		15.6		58	0.62559		58	0.115516
	59	224.226	212.188	244.409	1292.98		12.038		59	0.552458		59	0.117292
	60	226.95	214.386	249.077	1423.79		12.564		60	0.563257		60	0.109042
	61	220.125	205.977	250.817	1467.19		14.148		61	0.595779		61	0.106804
	62	234.15	218.381	254.433	1403.35		15.769		62	0.62906		62	0.114999
	63	226.142	216.114	238.74	1305.3		10.028		63	0.51119		63	0.11124
	64	229.767	215.398	240.663	1276.72		14.369		64	0.600316		64	0.115689
	65	232.086	216.081	240.052	1342.02		16.005		65	0.633905		65	0.108952
	66	232.681	217.203	227.625	1343.38		15.478		66	0.623085		66	0.0985878
	67	239.75	229.529	247.219	1468.06		10.221		67	0.515152		67	0.104045
	68	246.44	235.89	249.073	1445.81		10.55		68	0.521907		68	0.107214
	69	236.121	224.669	237.167	1416.17		11.452		69	0.540426		69	0.100428
	70	235.612	225.733	233.906	1399.8		9.879		70	0.50813		70	0.099154
	71	233.56	218.029	224.156	1323.42		15.531		71	0.624174		71	0.0973306
	72	229.517	217.238	229.76	1353.87		12.279		72	0.557406		72	0.0994881
	73	223.769	211.976	221.287	1341.35		11.793		73	0.547427		73	0.0935213
	74	231.212	225	227.275	1362.81		6.212		74	0.432842		74	0.0967504
	75	230.407	213.555	226.075	1507.39		16.852		75	0.651296		75	0.0857238
	76	229.704	217.738	231.025	1361.55		11.966		76	0.550979		76	0.0998944
	77	215.481	205.006	229.25	1302.59		10.475		77	0.520367		77	0.103404
	78	228.463	220.775	232.543	1385.61		7.688		78	0.463146		78	0.0991889
	79	227.03	219.474	246.034	1624.64		7.556		79	0.460436		79	0.0923528
	80	228.47	222.75	237.517	1703.78		5.72		80	0.422741		80	0.082297
	81	227.036	220.021	241.882	1696.94		7.015		81	0.449329		81	0.0854416
	82	237.114	220.729	247.459	1792.89		16.385		82	0.641707		82	0.0838653
	83	221.738	217.118	235.781	1696		4.62		83	0.400156		83	0.0815971

## Sheet: exp1-endosome5
endosome 5							dMFI		%dMFI				background-adjusted
	frame #	Rab7(rim)	Rab7(background)	YFP(lumen)	CFP(lumen)		Rab7		frame #	Rab7		frame #	YFP/CFP		YFP background	CFP background
	1	182.546	191.713	145.725	204.662		-9.167		1	0.081523		1	0.505277		108	130
	2	183.463	195.482	147.975	215.588		-12.019		2	0		2	0.467063
	3	179.837	191.75	146.623	206.942		-11.913		3	0.00302996		3	0.501976
	4	178.433	189.808	143.638	203.522		-11.375		4	0.0184084		4	0.484726
	5	171.221	182.173	140.478	189.783		-10.952		5	0.0304997		5	0.543265
	6	173.24	182.885	142.391	194.855		-9.645		6	0.0678596		6	0.530275
	7	176.889	183.274	142.05	196.887		-6.385		7	0.161045		7	0.509068
	8	175.962	182.205	141.043	193.333		-6.243		8	0.165104		8	0.521734
	9	173.404	180.122	141.232	192.87		-6.718		9	0.151526		9	0.528583
	10	176.298	181.096	140.739	190.754		-4.798		10	0.206409		10	0.538878
	11	178.087	185.288	144.797	198.13		-7.201		11	0.13772		11	0.5401
	12	171.394	176.891	141.42	194.899		-5.497		12	0.186428		12	0.514954
	13	180.507	185.651	141.263	194.436		-5.144		13	0.196518		13	0.516218
	14	178.853	184.177	141.147	194.628		-5.324		14	0.191373		14	0.512889
	15	179.614	185.967	140.672	198.693		-6.353		15	0.16196		15	0.475623
	16	183.038	188.663	138.752	197.555		-5.625		16	0.182769		16	0.455214
	17	185.045	192.272	140.496	197.686		-7.227		17	0.136977		17	0.480099
	18	193.5	198.511	141.036	201.073		-5.011		18	0.20032		18	0.464818
	19	185.439	189.478	142.321	203.657		-4.039		19	0.228104		19	0.465957
	20	183.25	188.832	140.022	198.307		-5.582		20	0.183998		20	0.468795
	21	178.106	186.13	140.007	203.102		-8.024		21	0.114195		21	0.43784
	22	188.879	193.321	136.299	192.971		-4.442		22	0.216585		22	0.449397
	23	181.043	187.698	134.309	188.866		-6.655		23	0.153327		23	0.44693
	24	179.284	183.779	135.155	191.588		-4.495		24	0.21507		24	0.440914
	25	187.974	195.767	137.495	195.969		-7.793		25	0.120798		25	0.447104
	26	197.371	202.5	138.884	199.286		-5.129		26	0.196947		26	0.445747
	27	194.306	197.784	138.196	199.295		-3.478		27	0.24414		27	0.43576
	28	189.782	192.636	137.688	197.696		-2.854		28	0.261977		28	0.438549
	29	191.032	194.227	137.741	198.286		-3.195		29	0.25223		29	0.435536
	30	196.492	193.347	136.259	196.321		3.145		30	0.433455		30	0.426094
	31	196.774	197.216	135.259	197.232		-0.442		31	0.330923		31	0.405447
	32	193.556	190.466	136.384	198.08		3.09		32	0.431883		32	0.416921
	33	192.887	192.04	135.741	196.58		0.847		33	0.367768		33	0.416657
	34	201.614	196.571	137.591	208		5.043		34	0.487709		34	0.379372
	35	199.652	190.12	136.978	200.343		9.532		35	0.616024		35	0.411953
	36	198.917	189.647	134.701	201.321		9.27		36	0.608535		36	0.374378
	37	201.174	190.766	135.504	200.839		10.408		37	0.641064		37	0.388261
	38	206.295	194.832	135.723	211.073		11.463		38	0.671221		38	0.341951
	39	205.962	195.239	133.117	206.467		10.723		39	0.650069		39	0.328468
	40	206.53	195.261	132.131	200.387		11.269		40	0.665676		40	0.342833
	41	215.636	199.217	131.219	202.102		16.419		41	0.812886		41	0.32203
	42	212.909	198.87	132.474	197.759		14.039		42	0.744855		42	0.361192
	43	216.841	200.065	132.109	197.964		16.776		43	0.823091		43	0.354732
	44	214.591	199.75	130.832	203.577		14.841		44	0.76778		44	0.310314
	45	218.523	200.201	127.912	198.81		18.322		45	0.867282		45	0.289377
	46	225.068	202.103	126.774	202.993		22.965		46	1		46	0.257203
	47	221.766	204.54	127.5	198.705		17.226		47	0.835954		47	0.283822
	48	222.914	203.433	128.54	206.839		19.481		48	0.900412		48	0.267312
	49	219.453	201.011	130.331	214.427		18.442		49	0.870712		49	0.264501
	50	209.976	201.26	129.559	215		8.716		50	0.5927		50	0.253635
	51	211.79	199.409	128.739	207.939		12.381		51	0.697462		51	0.266093
	52	208.225	200.778	124.49	205.481		7.447		52	0.556426		52	0.218466
	53	215.774	204.023	126.455	205.652		11.751		53	0.679453		53	0.243946
	54	215.492	201.511	129.179	204.5		13.981		54	0.743197		54	0.284282
	55	218.363	201.381	128.295	205.75		16.982		55	0.828979		55	0.267921
	56	220.645	203.057	128.411	206.357		17.588		56	0.846301		56	0.26731
	57	226.774	206.267	126.839	205.179		20.507		57	0.929739		57	0.250589
	58	217.363	201.136	126.991	200.616		16.227		58	0.807398		58	0.268933
	59	212.024	202.642	125.214	200.92		9.382		59	0.611737		59	0.242724
	60	210.613	197.398	125.107	198.143		13.215		60	0.721301		60	0.251046
	61	212.863	197.938	126.661	207.232		14.925		61	0.770181		61	0.241623
	62	210.524	196.892	126.295	201.732		13.632		62	0.733221		62	0.255047
	63	213.323	195.642	124.152	198.75		17.681		63	0.84896		63	0.234938
	64	212.766	197.994	124.732	193.554		14.772		64	0.765807		64	0.263272
	65	212.926	194.811	124.661	192.385		18.115		65	0.861365		65	0.267067
	66	214.692	196.432	124.735	195.469		18.26		66	0.86551		66	0.255617
	67	217.828	201.291	125.064	203.053		16.537		67	0.816259		67	0.233584
	68	217.262	199.753	126.841	212.77		17.509		68	0.844043		68	0.227631
	69	207.175	193.631	124.279	199.981		13.544		69	0.730705		69	0.23262
	70	208.554	197.238	124.407	196.698		11.316		70	0.667019		70	0.245989
	71	202.616	192.006	122.919	188.5		10.61		71	0.646839		71	0.255026
	72	204.777	194.839	123.698	189.895		9.938		72	0.62763		72	0.262092
	73	195.446	190.946	123.919	190.198		4.5		73	0.472187		73	0.264444
	74	202.324	197.957	124.734	192.557		4.367		74	0.468386		74	0.2675
	75	198.223	188.518	123.545	197.557		9.705		75	0.62097		75	0.230102
	76	204.062	197.595	125.114	195.25		6.467		76	0.528413		76	0.262284
	77	195.634	187.262	123.875	188.341		8.372		77	0.582866		77	0.272107
	78	212.973	202.923	124.989	188.977		10.05		78	0.630831		78	0.288061
	79	197.491	189.017	124.135	194.202		8.474		79	0.585782		79	0.251316
	80	194.543	186.895	123.697	193.629		7.648		80	0.562171		80	0.246696
	81	188.293	182.471	123.157	186.528		5.822		81	0.509976		81	0.268133
	82	191.138	186.18	123.157	191.966		4.958		82	0.485279		82	0.244602
	83	188.414	181.204	121.714	185.545		7.21		83	0.549651		83	0.246899
	84	187.5	179.643	120.837	185.663		7.857		84	0.568145		84	0.23062
	85	189.911	178.405	121.884	187.837		11.506		85	0.67245		85	0.240054
	86	193.161	179.298	120.733	190.023		13.863		86	0.739824		86	0.212135
	87	186.324	177.963	120.514	182.171		8.361		87	0.582552		87	0.239865
	88	184.481	176.86	120.075	188.162		7.621		88	0.561399		88	0.20761
	89	192.806	182.012	120.487	188.762		10.794		89	0.652098		89	0.212501
	90	189.231	181.031	120.9	187.371		8.2		90	0.57795		90	0.224852
	91	197.731	186.91	121.928	195.362		10.821		91	0.65287		91	0.21309
	92	189.196	176.077	118.395	192.628		13.119		92	0.718557		92	0.16598
	93	194.893	177.69	121.465	201.349		17.203		93	0.835296		93	0.18872
	94	187.806	175.22	122.312	197.525		12.586		94	0.703322		94	0.211951
	95	180.407	171.902	121.513	192.4		8.505		95	0.586668		95	0.216554
	96	182.694	171.311	121.412	198.562		11.383		96	0.668934		96	0.195619

## Sheet: exp1-endosome6
endosome 6							dMFI		%dMFI				background-adjusted
	frame #	Rab7(rim)	Rab7(background)	YFP(lumen)	CFP(lumen)		Rab7		frame #	Rab7		frame #	YFP/CFP		YFP background	CFP background
	1	206.343	211.287	153.725	222.05		-4.944		1	0.290525		1	0.496741		108	130
	2	208.611	218.488	149.95	223.625		-9.877		2	0.192229		2	0.448064
	3	207.278	217.268	151.738	220.2		-9.99		3	0.189977		3	0.4849
	4	200.231	210.402	148.062	212.188		-10.171		4	0.18637		4	0.487443
	5	195.963	206.61	147.45	209.025		-10.647		5	0.176886		5	0.499209
	6	197.463	207.97	145.213	206.062		-10.507		6	0.179675		6	0.489246
	7	192.944	203.646	146.175	210.562		-10.702		7	0.17579		7	0.473859
	8	193.657	207.402	145.475	207.975		-13.745		8	0.115154		8	0.480603
	9	193.361	204.573	146.3	210.688		-11.212		9	0.165627		9	0.474668
	10	200.139	210.055	145.725	210.588		-9.916		10	0.191452		10	0.468122
	11	205.546	216.457	150.25	219.5		-10.911		11	0.171625		11	0.472067
	12	195.38	204.902	148.812	212.262		-9.522		12	0.199303		12	0.496122
	13	192.519	212.043	150.275	216.688		-19.524		13	0		13	0.487668
	14	191.944	208.274	149.95	209.562		-16.33		14	0.0636445		14	0.527262
	15	196.935	208.341	148	212.25		-11.406		15	0.161761		15	0.486322
	16	195.009	206.933	145.438	206.613		-11.924		16	0.15144		16	0.488664
	17	196.824	212.537	147.5	208.2		-15.713		17	0.075939		17	0.505115
	18	212.287	222.677	147	209.15		-10.39		18	0.182007		18	0.492735
	19	199.843	212.878	147.887	209.275		-13.035		19	0.129302		19	0.503147
	20	201.917	207.043	144.162	201.85		-5.126		20	0.286898		20	0.503299
	21	201.361	207.744	142.213	200.25		-6.383		21	0.261851		21	0.487018
	22	207.13	210.171	140.137	197.8		-3.041		22	0.328445		22	0.473997
	23	200.343	206.177	139.238	195.925		-5.834		23	0.272791		23	0.473841
	24	198.315	205.274	139.562	198.938		-6.959		24	0.250374		24	0.457832
	25	207.157	212.244	139.9	210.338		-5.087		25	0.287676		25	0.397072
	26	215.241	217.335	143.213	212.325		-2.094		26	0.347315		26	0.427732
	27	213.824	215.165	141.312	212.412		-1.341		27	0.362319		27	0.404213
	28	208.58	207.446	139.802	211.756		1.134		28	0.411637		28	0.388987
	29	213.361	215.098	139.675	209.312		-1.737		29	0.354429		29	0.399372
	30	206.231	207.659	138.125	211.1		-1.428		30	0.360586		30	0.371455
	31	207.981	210.049	137.6	201.738		-2.068		31	0.347833		31	0.412613
	32	210.88	211.049	136.275	209.25		-0.169		32	0.385673		32	0.356782
	33	213.778	214.549	130.75	213.15		-0.771		33	0.373677		33	0.273602
	34	217.787	218.933	135.188	223.05		-1.146		34	0.366205		34	0.292187
	35	218.176	213.378	130.7	217.088		4.798		35	0.484647		35	0.260656
	36	223.565	214.659	130.375	219.363		8.906		36	0.566504		36	0.250383
	37	223.524	212.886	127.321	217.438		10.638		37	0.601016		37	0.220968
	38	236.448	217.61	129.897	229.515		18.838		38	0.764412		38	0.220037
	39	235.233	211.762	129.443	225.134		23.471		39	0.85673		39	0.225398
	40	229.75	205.57	127.804	222.804		24.18		40	0.870858		40	0.213396
	41	235.647	211.552	127.072	223.68		24.095		41	0.869164		41	0.203587
	42	229.897	205.547	126	218.979		24.35		42	0.874245		42	0.202295
	43	237.078	211.913	126.052	223.371		25.165		43	0.890485		43	0.193336
	44	226.328	205.5	125.412	219.804		20.828		44	0.804065		44	0.193889
	45	223.026	205.884	124.66	212.124		17.142		45	0.730617		45	0.202864
	46	227.776	204.924	122.722	220.536		22.852		46	0.844396		46	0.162609
	47	230.534	209.913	124.082	226.99		20.621		47	0.79994		47	0.165811
	48	234.25	211.25	124.412	226.845		23		48	0.847345		48	0.169467
	49	241.405	210.744	125.577	235.701		30.661		49	1		49	0.16629
	50	241.526	211.413	127.216	240.577		30.113		50	0.98908		50	0.173779
	51	234.75	209.099	125.186	236.99		25.651		51	0.900169		51	0.160632
	52	238.69	210.576	126.876	233.093		28.114		52	0.949248		52	0.183097
	53	236.784	209.89	123.763	229.392		26.894		53	0.924938		53	0.158594
	54	213.871	199.483	125.34	229.423		14.388		54	0.67574		54	0.174406
	55	215.176	197.909	125.487	234.688		17.267		55	0.733108		55	0.167039
	56	214.667	199.896	125.963	244.15		14.771		56	0.683372		56	0.157363
	57	211.611	200.585	121.55	233.7		11.026		57	0.608748		57	0.130665
	58	208.046	195.037	123.237	236.562		13.009		58	0.648261		58	0.142987
	59	198.529	194.333	121.42	221.203		4.196		59	0.472651		59	0.147144
	60	208.048	194.917	121.942	234.319		13.131		60	0.650692		60	0.133648
	61	210.471	197.391	124.551	249.478		13.08		61	0.649676		61	0.138528
	62	209.83	199.086	124.233	240.483		10.744		62	0.603128		62	0.146928
	63	211	194.949	124.493	237.739		16.051		63	0.708877		63	0.153083
	64	208.167	194.533	124.423	233.173		13.634		64	0.660715		64	0.159179
	65	206.269	193.186	123.101	240.768		13.083		65	0.649736		65	0.13633
	66	208.385	195.096	123.841	239.348		13.289		66	0.653841		66	0.144868
	67	216.519	203.109	124.884	254.435		13.41		67	0.656252		67	0.135685
	68	219.41	203.447	124.25	256.033		15.963		68	0.707124		68	0.128934
	69	213.606	198.16	121.362	249.594		15.446		69	0.696822		69	0.111728
	70	211.417	195.803	123.058	241.788		15.614		70	0.700169		70	0.134701
	71	209.771	196.191	122.981	238.558		13.58		71	0.659639		71	0.138
	72	210.719	195.48	123.577	240.596		15.239		72	0.692697		72	0.140846
	73	203.156	192.086	122.942	240.75		11.07		73	0.609624		73	0.134916
	74	211.438	201.684	123.019	251.423		9.754		74	0.583401		74	0.123692
	75	208.205	199.292	123.083	265.972		8.913		75	0.566643		75	0.110927
	76	218.136	207.153	123.778	248.417		10.983		76	0.607891		76	0.133241
	77	205.318	195.424	123.278	233.222		9.894		77	0.586191		77	0.148011
	78	219.636	207.451	124.139	239.861		12.185		78	0.631842		78	0.146904
	79	212.284	194.979	123	255.611		17.305		79	0.733865		79	0.119416
	80	211.489	197.521	122.028	261.639		13.968		80	0.667371		80	0.106564
	81	207.609	196.345	123.386	257.545		11.264		81	0.61349		81	0.120632
	82	214.902	198.993	123.727	264.136		15.909		82	0.706048		82	0.117247
	83	204.446	191.858	120.205	241.773		12.588		83	0.639872		83	0.109195
	84	207.391	195.919	121.318	249.25		11.472		84	0.617635		84	0.111681
	85	206.489	192.743	121.324	256.459		13.746		85	0.662947		85	0.105362
	86	210.409	197.153	118.595	247.595		13.256		86	0.653183		86	0.0900974
	87	206.845	195.079	122.029	253.382		11.766		87	0.623493		87	0.113704
	88	210.571	197.721	119.382	260.941		12.85		88	0.645093		88	0.0869246
	89	216.095	200.5	120.029	257.382		15.595		89	0.699791		89	0.0944325
	90	214.071	197.664	122.441	253.294		16.407		90	0.715971		90	0.117127
	91	221.06	206.393	124.265	261		14.667		91	0.681299		91	0.12416
	92	210.357	197.629	124.794	267.353		12.728		92	0.642662		92	0.122269
	93	210.94	195.464	121.971	279.235		15.476		93	0.69742		93	0.0936174
	94	209.631	196.143	124.324	276		13.488		94	0.657806		94	0.111808
	95	202.048	191.493	123.406	275.594		10.555		95	0.599362		95	0.105815

## Sheet: exp1-endosome7
endosome 7							dMFI		%dMFI				background-adjusted
	frame #	Rab7(rim)	Rab7(background)	YFP(lumen)	CFP(lumen)		Rab7		frame #	Rab7		frame #	YFP/CFP		YFP background	CFP background
	1	188.008	197.223	170.723	239.307		-9.215		1	0.166518		1	0.573824		108	130
	2	188.841	199.212	168.555	233.277		-10.371		2	0.139467		2	0.586336
	3	185.962	200.489	167.358	231.117		-14.527		3	0.0422146		3	0.587023
	4	187.023	198.734	161.263	224.591		-11.711		4	0.108111		4	0.563087
	5	183.159	195.136	161.036	219.394		-11.977		5	0.101886		5	0.593284
	6	185.659	199.158	160.314	226.431		-13.499		6	0.0662704		6	0.542502
	7	180.886	197.217	160.19	218.759		-16.331		7	0		7	0.587997
	8	184.848	199.424	157.19	224.518		-14.576		8	0.041068		8	0.52043
	9	188.559	199.536	161.301	230.635		-10.977		9	0.125287		9	0.529647
	10	194.265	206.651	161.526	225.506		-12.386		10	0.0923153		10	0.560446
	11	196.824	207.927	166.231	233.981		-11.103		11	0.122338		11	0.560016
	12	188.331	198.115	160.212	225.192		-9.784		12	0.153204		12	0.548491
	13	190.132	205.318	157.301	224.494		-15.186		13	0.0267937		13	0.521737
	14	196.362	202.328	161.404	232.87		-5.966		14	0.242547		14	0.519141
	15	198.776	204.025	160.163	238.745		-5.249		15	0.259325		15	0.479682
	16	197.651	201.637	155.312	229.678		-3.986		16	0.28888		16	0.474648
	17	200.586	208.039	159.736	233.812		-7.453		17	0.20775		17	0.498362
	18	212.151	219.255	160.899	235.712		-7.104		18	0.215917		18	0.500407
	19	194.77	201.603	162.221	234.779		-6.833		19	0.222259		19	0.51748
	20	189.967	200.5	162.923	230.995		-10.533		20	0.135677		20	0.543819
	21	189.743	197.539	156.529	224.688		-7.796		21	0.199724		21	0.512515
	22	191.829	197.74	153.875	222.928		-5.911		22	0.243834		22	0.493662
	23	188.974	193.451	154.654	221.245		-4.477		23	0.27739		23	0.511305
	24	186.605	190.162	154.216	217.418		-3.557		24	0.298919		24	0.528678
	25	196.507	201.225	157.409	233.793		-4.718		25	0.271751		25	0.476034
	26	193.118	205.005	157.053	226.933		-11.887		26	0.103992		26	0.506051
	27	196.243	205.696	160.115	229.995		-9.453		27	0.160949		27	0.521176
	28	186.592	199.225	154.543	224.101		-12.633		28	0.0865353		28	0.494607
	29	189.704	201.588	157.663	222.678		-11.884		29	0.104062		29	0.535866
	30	185.816	194.015	154.221	219.202		-8.199		30	0.190293		30	0.518161
	31	190.908	200.338	151.562	215.197		-9.43		31	0.161487		31	0.511309
	32	185.684	198.814	155.399	221.346		-13.13		32	0.0749052		32	0.518895
	33	186.697	198.152	151.038	215.274		-11.455		33	0.114101		33	0.504702
	34	193.73	202.26	154.481	221.966		-8.53		34	0.182548		34	0.505415
	35	185.013	195.377	153.197	216.476		-10.364		35	0.139631		35	0.522654
	36	183.296	193.701	156.673	218.87		-10.405		36	0.138672		36	0.547688
	37	186.572	195.5	154.995	216.808		-8.928		37	0.173234		37	0.541367
	38	190.803	197.431	160.822	227.029		-6.628		38	0.227056		38	0.544394
	39	190.408	196.093	157.923	223.034		-5.685		39	0.249122		39	0.53661
	40	184.342	190.975	154.567	214.087		-6.633		40	0.226939		40	0.553795
	41	191.309	197.691	155.971	215.909		-6.382		41	0.232812		41	0.558393
	42	186.789	194.181	153.149	212.01		-7.392		42	0.209178		42	0.55053
	43	189.316	196.309	154.37	209.851		-6.993		43	0.218515		43	0.580707
	44	188.401	192.887	153.154	209.812		-4.486		44	0.27718		44	0.565755
	45	188.224	191.632	148.957	204.25		-3.408		45	0.302406		45	0.551609
	46	187.09	189.542	150.502	206.284		-2.452		46	0.324777		46	0.557155
	47	191.205	192.835	153.773	209.867		-1.63		47	0.344012		47	0.573115
	48	195.679	197.179	157.004	217.996		-1.5		48	0.347054		48	0.556889
	49	196.179	199.344	158.489	221.702		-3.165		49	0.308092		49	0.550577
	50	193.41	199.623	162.458	224.524		-6.213		50	0.236767		50	0.576129
	51	192.731	196.637	159.493	222.92		-3.906		51	0.290752		51	0.554165
	52	194.109	196.953	159.507	225.724		-2.844		52	0.315604		52	0.538078
	53	192.032	197.34	157.316	227.578		-5.308		53	0.257944		53	0.505401
	54	188.5	192	158.476	233.427		-3.5		54	0.300253		54	0.488035
	55	189.192	192.505	156.902	231.449		-3.313		55	0.304629		55	0.482035
	56	190.891	195.613	159.249	238.031		-4.722		56	0.271657		56	0.474392
	57	189.256	194.84	157.653	232.587		-5.584		57	0.251486		57	0.484009
	58	186.429	190.566	153.556	224.742		-4.137		58	0.285347		58	0.480843
	59	190.718	194.429	149.044	221.24		-3.711		59	0.295315		59	0.449847
	60	188.846	195.269	151.084	225.444		-6.423		60	0.231853		60	0.451406
	61	191.199	197.642	151.018	231.724		-6.443		61	0.231385		61	0.422889
	62	195.801	198.995	149.56	232.96		-3.194		62	0.307413		62	0.403652
	63	188.878	192.146	148.36	226.52		-3.268		63	0.305682		63	0.418152
	64	188.705	193.505	148.916	226.573		-4.8		64	0.269832		64	0.423679
	65	183.455	187.788	145.631	223.062		-4.333		65	0.28076		65	0.404365
	66	184.91	189.042	146.369	223.578		-4.132		66	0.285464		66	0.410022
	67	188.494	193.675	150.427	236.333		-5.181		67	0.260916		67	0.399001
	68	190.712	197.085	149.502	233.102		-6.373		68	0.233023		68	0.402533
	69	184.98	190.176	146.173	230.986		-5.196		69	0.260565		69	0.378003
	70	187.039	192.627	143.538	226.226		-5.588		70	0.251392		70	0.369318
	71	182.836	189.515	143.25	222.163		-6.679		71	0.225862		71	0.382475
	72	186.836	191.412	143.014	225.341		-4.576		72	0.275074		72	0.36725
	73	183.842	189.858	141.486	218.649		-6.016		73	0.241377		73	0.377737
	74	194.493	199.314	136.875	225.245		-4.821		74	0.269341		74	0.303166
	75	190.52	195.162	139.524	231.163		-4.642		75	0.273529		75	0.311616
	76	206.02	206.799	140.596	228.923		-0.779		76	0.363926		76	0.329509
	77	198.678	194.848	133.938	221.38		3.83		77	0.471779		77	0.283848
	78	214.414	211.353	131.106	226.577		3.061		78	0.453784		78	0.23925
	79	206.842	199.382	131.428	245.26		7.46		79	0.556723		79	0.203262
	80	211.401	203.544	128.567	247.231		7.857		80	0.566013		80	0.17544
	81	211.914	200.446	127.115	238.375		11.468		81	0.650512		81	0.176378
	82	211.717	198.211	125.962	241.082		13.506		82	0.698203		82	0.1617
	83	205.118	196.706	123.505	229.841		8.412		83	0.579		83	0.155297
	84	217.865	191.462	123.342	253.72		26.403		84	1		84	0.124006
	85	209.461	191.904	123.079	252.398		17.557		85	0.792999		85	0.123196
	86	213.855	194.163	121.963	250.819		19.692		86	0.842959		86	0.11557
	87	213.385	193.12	122.339	248.354		20.265		87	0.856367		87	0.121153
	88	214.209	193.955	120.057	257.661		20.254		88	0.85611		88	0.0944454
	89	212.601	192.875	123.333	255.167		19.726		89	0.843754		89	0.1225
	90	201.561	189.17	122.859	260.547		12.391		90	0.672111		90	0.113821
	91	211.895	198.775	125.524	271.438		13.12		91	0.68917		91	0.123899
	92	205.888	188.755	123.928	271.827		17.133		92	0.783077		92	0.112306
	93	208.289	189.578	125.341	283.558		18.711		93	0.820003		93	0.112928
	94	198.903	186.335	123.904	272.463		12.568		94	0.676253		94	0.111636
	95	194.965	184.2	123.023	275.452		10.765		95	0.634062		95	0.103285
	96	192.662	187	122.897	267.635		5.662		96	0.514649		96	0.108236
	97	197.242	194.908	124.956	258.818		2.334		97	0.436772		97	0.131628
	98	190.978	186.766	123.16	264.66		4.212		98	0.480718		98	0.11258
	99	191.712	187.245	120.589	267.432		4.467		99	0.486685		99	0.0916017
	100	195.697	188.489	121.247	276.11		7.208		100	0.550826		100	0.0906646
	101	194.614	189.128	122.822	271.034		5.486		101	0.51053		101	0.105095
	102	200.824	194.615	125.308	289.077		6.209		102	0.527449		102	0.108803
	103	200.956	191.974	124.09	297.391		8.982		103	0.592339		103	0.0961223
	104	201.6	190.184	123.175	272.283		11.416		104	0.649296		104	0.106654
	105	198.521	186.459	122.301	262.795		12.062		105	0.664412		105	0.107692
	106	198.243	192.609	122.154	250.103		5.634		106	0.513994		106	0.117849
	107	189.172	182.222	121.79	251.952		6.95		107	0.544789		107	0.113077
	108	190.422	186.578	120.798	253.153		3.844		108	0.472107		108	0.10392
	109	187.597	182.057	120.143	254.312		5.54		109	0.511794		109	0.0976816
	110	197.282	190.108	121.071	264.67		7.174		110	0.55003		110	0.0970595
	111	192.652	188.5	120.314	253.07		4.152		111	0.479314		111	0.100057
	112	191.325	184.267	119.913	258.673		7.058		112	0.547316		112	0.0925835
	113	189.183	194.179	120.625	286.266		-4.996		113	0.265245		113	0.0807917
	114	181.337	181	121.13	286.029		0.337		114	0.390041		114	0.084151
	115	181.139	178.579	123.237	288.562		2.56		115	0.44206		115	0.0960949

## Sheet: exp1-endosome8
endosome 8							dMFI		%dMFI				background-adjusted
	frame #	Rab7(rim)	Rab7(background)	YFP(lumen)	CFP(lumen)		Rab7		frame #	Rab7		frame #	YFP/CFP		YFP background	CFP background
	1	217.445	222.982	183.125	273.836		-5.537		1	0		1	0.522296		108	130
	2	224.189	223.232	177.367	275.918		0.957		2	0.117705		2	0.475383
	3	223.659	222.727	175.891	275.156		0.932		3	0.117252		3	0.467711
	4	221.927	220.855	170.043	263.023		1.072		4	0.119789		4	0.466408
	5	225.159	219.382	168.543	262.879		5.777		5	0.205068		5	0.455625
	6	224.055	219.814	167.93	271.859		4.241		6	0.177228		6	0.422462
	7	225.195	219.773	165.457	267.219		5.422		7	0.198633		7	0.418725
	8	229.524	220.6	163.93	274.684		8.924		8	0.262108		8	0.386567
	9	228.854	220.977	166.039	277.348		7.877		9	0.243131		9	0.393891
	10	238.909	230.45	162.555	277.336		8.459		10	0.253679		10	0.370276
	11	239.421	232.905	169.059	286.676		6.516		11	0.218462		11	0.389715
	12	231.415	222.341	160.98	275.531		9.074		12	0.264826		12	0.364046
	13	248.451	223.477	165.09	275.824		24.974		13	0.553016		13	0.391499
	14	253.622	218.827	158.797	285.184		34.795		14	0.731023		14	0.327334
	15	262.113	220.995	155.231	292.13		41.118		15	0.845628		15	0.291316
	16	259.055	222.341	149.68	285.016		36.714		16	0.765805		16	0.268875
	17	271.835	222.2	150.91	286.746		49.635		17	1		17	0.273755
	18	276.811	239.405	151.055	290.305		37.406		18	0.778348		18	0.268582
	19	249.104	219.427	159.566	289.973		29.677		19	0.638259		19	0.322342
	20	238.043	212.209	150.609	273.992		25.834		20	0.568604		20	0.295912
	21	229.049	210.882	148.648	268.945		18.167		21	0.429638		21	0.292547
	22	231.737	215.25	142.101	248.93		16.487		22	0.399188		22	0.286732
	23	217.974	207.307	139.578	247.507		10.667		23	0.2937		23	0.268733
	24	219.836	205.76	136.957	245.582		14.076		24	0.355488		24	0.250532
	25	226.84	217.33	142.434	266.522		9.51		25	0.272729		25	0.252223
	26	232.481	221.834	143.178	260.515		10.647		26	0.293337		26	0.269532
	27	227.915	218.131	141.789	260.392		9.784		27	0.277695		27	0.259134
	28	220.418	211.223	139.769	263.917		9.195		28	0.26702		28	0.237229
	29	222.87	215.524	139.489	264.727		7.346		29	0.233506		29	0.233724
	30	215.879	208.09	139.562	254.774		7.789		30	0.241536		30	0.252953
	31	219.056	212.824	137.277	244.929		6.232		31	0.213315		31	0.25474
	32	222.356	211.106	138.324	264.515		11.25		32	0.304267		32	0.225432
	33	220.25	212.665	138.893	254.136		7.585		33	0.237838		33	0.248864
	34	223.144	217.163	140.835	259.271		5.981		34	0.208765		34	0.254001
	35	215.894	211.418	137.496	252.789		4.476		35	0.181487		35	0.240217
	36	213	209.59	138.452	251.884		3.41		36	0.162166		36	0.249844
	37	213.727	208.314	137.486	255.932		5.413		37	0.19847		37	0.234142
	38	217.614	213.101	141.459	275.603		4.513		38	0.182158		38	0.229796
	39	216.765	210.138	139.637	262.055		6.627		39	0.220474		39	0.239574
	40	215.309	204.406	137.308	257.449		10.903		40	0.297977		40	0.229959
	41	222.803	210.272	138.423	262.277		12.531		41	0.327485		41	0.229995
	42	218.058	211.29	137.346	262.212		6.768		42	0.22303		42	0.221962
	43	229.508	214.847	135.714	271.964		14.661		43	0.366091		43	0.195219
	44	224.847	213.142	136.554	261.634		11.705		44	0.312514		44	0.21692
	45	219.048	212.688	134.214	250.482		6.36		45	0.215635		45	0.217576
	46	223.871	207.299	133.942	263.212		16.572		46	0.400729		46	0.194742
	47	220.694	209.67	137.232	271.366		11.024		47	0.30017		47	0.206782
	48	225.911	214.46	136.821	272.652		11.451		48	0.30791		48	0.202037
	49	232.089	217.545	137.75	279.92		14.544		49	0.363971		49	0.198439
	50	231.392	217.858	141.048	283.808		13.534		50	0.345664		50	0.214865
	51	231.105	213.42	138.192	279.519		17.685		51	0.420902		51	0.201928
	52	232.571	220.952	139.012	278.791		11.619		52	0.310955		52	0.208427
	53	232.089	220.732	138.384	278.872		11.357		53	0.306206		53	0.204095
	54	220.922	210.483	141.031	276.701		10.439		54	0.289567		54	0.225159
	55	224.366	215.726	138.895	277.267		8.64		55	0.25696		55	0.209789
	56	223.944	216.055	139.165	280.848		7.889		56	0.243348		56	0.206599
	57	222.065	215.019	138.514	283.957		7.046		57	0.228069		57	0.198198
	58	212.917	204.262	134.6	276.443		8.655		58	0.257232		58	0.181641
	59	213.972	206.019	134.229	262.386		7.953		59	0.244508		59	0.198125
	60	217.452	208.019	134.638	273.391		9.433		60	0.271333		60	0.185772
	61	214.759	207.171	136.05	288.337		7.588		61	0.237892		61	0.177154
	62	218.537	210.341	137.387	279.637		8.196		62	0.248912		62	0.196389
	63	211.12	203.835	134.287	265.212		7.285		63	0.2324		63	0.194413
	64	211.204	203.825	135.486	264.114		7.379		64	0.234104		64	0.204945

## Sheet: exp1-endosome9
endosome 9							dMFI		%dMFI				background-adjusted
	frame #	Rab7(rim)	Rab7(background)	YFP(lumen)	CFP(lumen)		Rab7		frame #	Rab7		frame #	YFP/CFP		YFP background	CFP background
	1	233.287	239.651	182.673	285.526		-6.364		1	0.0502567		1	0.480132		108	130
	2	235.007	240.63	174.756	296.365		-5.623		2	0.083626		2	0.401262
	3	228.801	236.281	174.071	301.737		-7.48		3	0		3	0.384722
	4	225.066	230.052	165.455	286.904		-4.986		4	0.112312		4	0.366179
	5	224.603	230.469	163.91	291.686		-5.866		5	0.0726831		5	0.345794
	6	225.803	227.332	161.467	297.307		-1.529		6	0.267991		6	0.319574
	7	223.864	227.842	159.058	299.036		-3.978		7	0.157705		7	0.302054
	8	227.962	230.043	160.438	308.182		-2.081		8	0.243132		8	0.294295
	9	230.841	228.016	161.146	308.569		2.825		9	0.464064		9	0.297622
	10	232.19	228.041	150.979	304.907		4.149		10	0.523687		10	0.245725
	11	236.672	233.041	159.082	318.402		3.631		11	0.50036		11	0.271133
	12	228.44	222.872	156.773	308.66		5.568		12	0.587589		12	0.272993
	13	239.227	228.228	160.263	316.628		10.999		13	0.832162		13	0.280038
	14	236.153	225.392	155.393	305.304		10.761		14	0.821445		14	0.270348
	15	238.516	225.972	154.17	311		12.544		15	0.901738		15	0.255083
	16	235.403	221.807	153.17	300.107		13.596		16	0.949113		16	0.265539
	17	240.548	227.278	154.098	296.527		13.27		17	0.934432		17	0.27682
	18	252.411	240.142	152.446	299.812		12.269		18	0.889354		18	0.261737
	19	236.089	224.943	153.027	312.107		11.146		19	0.838782		19	0.247256
	20	235.25	227.261	149.464	299.268		7.989		20	0.696614		20	0.244961
	21	224.339	218.062	148.125	287.911		6.277		21	0.619517		21	0.254099
	22	227.758	223.188	144.929	278.759		4.57		22	0.542646		22	0.248247
	23	216.073	215.932	147.438	286.482		0.141		23	0.343196		23	0.252029
	24	220.645	215.068	143.518	283.009		5.577		24	0.587994		24	0.23213
	25	244.802	230.186	149.351	316.052		14.616		25	0.995046		25	0.222255
	26	241.052	233.692	147.485	305.577		7.36		26	0.668288		26	0.224887
	27	235.897	228	147.732	319.835		7.897		27	0.692471		27	0.209298
	28	232.336	222.552	143.897	312.804		9.784		28	0.777448		28	0.196369
	29	230.526	228.355	141.959	295.732		2.171		29	0.434612		29	0.204903
	30	215.319	216.564	142.103	278.907		-1.245		30	0.28078		30	0.229022
	31	215.371	216.244	138.402	268.443		-0.873		31	0.297532		31	0.219599
	32	218.862	214.378	135.32	282.124		4.484		32	0.538773		32	0.17959
	33	218.534	218.581	132.474	265.361		-0.047		33	0.334729		33	0.180805
	34	235.353	225.221	134.99	276.784		10.132		34	0.793119		34	0.183876
	35	224.129	213.61	132.897	266.33		10.519		35	0.810547		35	0.182623
	36	228.319	215.337	134.979	279.309		12.982		36	0.921463		36	0.180692
	37	232.875	218.149	133.279	282.616		14.726		37	1		37	0.165638
	38	231.306	223.994	135.738	288.775		7.312		38	0.666126		38	0.1747
	39	219.12	217.189	136.287	283.025		1.931		39	0.423804		39	0.184852
	40	215.602	212.695	133.062	262.5		2.907		40	0.467756		40	0.189147
	41	220.231	221.348	134.5	267.1		-1.117		41	0.286544		41	0.19329
	42	209.929	214.571	132.5	258.047		-4.642		42	0.127803		42	0.191336
	43	206.821	213.393	132.512	267.081		-6.572		43	0.0408898		43	0.178814
	44	205.065	208.494	133.512	264.475		-3.429		44	0.182428		44	0.189716
	45	202.111	206.543	129.8	239.875		-4.432		45	0.13726		45	0.198407
	46	203.083	203.354	132.637	253.05		-0.271		46	0.324642		46	0.200219
	47	205.824	206.896	134.025	253		-1.072		47	0.288571		47	0.211585
	48	209.352	210.976	131.312	253.188		-1.624		48	0.263713		48	0.189239
	49	213.593	215.988	133.15	258.238		-2.395		49	0.228992		49	0.19612
	50	215.917	214.881	137.771	267.957		1.036		50	0.3835		50	0.215799
	51	211.833	211.694	134.514	256.729		0.139		51	0.343105		51	0.209218
	52	207.333	208.469	137.8	258.271		-1.136		52	0.285689		52	0.232321
	53	212.827	209.936	135.638	249.536		2.891		53	0.467036		53	0.231211
	54	207.596	204.705	136.87	262.42		2.891		54	0.467036		54	0.218018
	55	204.698	205.697	136.627	263.02		-0.999		55	0.291858		55	0.215208
	56	207.708	208.974	137.824	259.471		-1.266		56	0.279834		56	0.230353
	57	211.188	211.388	137.353	255.235		-0.2		57	0.327839		57	0.234383
	58	198.104	202.362	131.765	242.196		-4.258		58	0.145096		58	0.211817

## Sheet: exp1-endosome10
endosome 10							dMFI		%dMFI				background-adjusted
	frame #	Rab7(rim)	Rab7(background)	YFP(lumen)	CFP(lumen)		Rab7		frame #	Rab7		frame #	YFP/CFP		YFP background	CFP background
	1	204.02	217.305	197.046	275.869		-13.285		1	0.0928851		1	0.610452		108	130
	2	203.466	219.258	196.163	278.763		-15.792		2	0.0326048		2	0.592641
	3	200.26	217.408	193.52	272.71		-17.148		3	0		3	0.599257
	4	200.302	209.862	186.896	262.81		-9.56		4	0.182452		4	0.594052
	5	196.962	209.59	186.233	261.442		-12.628		5	0.108683		5	0.59519
	6	199.577	209.974	185.419	265.098		-10.397		6	0.162327		6	0.573058
	7	200.455	211.871	185.25	264.628		-11.416		7	0.137825		7	0.573803
	8	201.686	212.39	186.978	266.691		-10.704		8	0.154945		8	0.577785
	9	199.755	209.232	188.319	263.369		-9.477		9	0.184448		9	0.602231
	10	202.486	213.555	183.32	261.189		-11.069		10	0.146168		10	0.574134
	11	206.986	219.732	192.046	271.626		-12.746		11	0.105845		11	0.593436
	12	196.353	205.954	182.007	259.976		-9.601		12	0.181466		12	0.56939
	13	198.455	208.158	184.243	267.406		-9.703		13	0.179014		13	0.554874
	14	196.146	206.765	184.1	265.969		-10.619		14	0.156989		14	0.559686
	15	196.206	203.362	182.348	266.279		-7.156		15	0.240256		15	0.545557
	16	195.632	202.896	178.165	257.987		-7.264		16	0.237659		16	0.54822
	17	199.304	206.419	178.547	260.638		-7.115		17	0.241242		17	0.540019
	18	212.985	219.208	179.413	265.147		-6.223		18	0.26269		18	0.52841
	19	201.52	206.888	182.982	265.81		-5.368		19	0.283248		19	0.55211
	20	198.33	203.067	178.11	259.663		-4.737		20	0.29842		20	0.540709
	21	196.175	201.086	175.806	251.086		-4.911		21	0.294236		21	0.559982
	22	202.396	208.881	169.554	242.427		-6.485		22	0.25639		22	0.547502
	23	195.769	202.131	170.436	242.45		-6.362		23	0.259347		23	0.555233
	24	196.311	201.478	170.712	247.28		-5.167		24	0.288081		24	0.53472
	25	201.441	211.335	182.897	267.393		-9.894		25	0.174421		25	0.54513
	26	209.191	218.219	179.33	265.042		-9.028		26	0.195244		26	0.528206
	27	205.608	216.235	177.603	265.547		-10.627		27	0.156796		27	0.513497
	28	200.304	208.758	176.393	260.089		-8.454		28	0.209046		28	0.52574
	29	201.686	214.588	175.163	258.904		-12.902		29	0.102094		29	0.521031
	30	201.828	211.812	171.558	252.232		-9.984		30	0.172257		30	0.519978
	31	202.176	213.054	167.65	248.661		-10.878		31	0.150761		31	0.502693
	32	201.552	210.019	172.718	259.401		-8.467		32	0.208733		32	0.500135
	33	203.047	211.291	169.679	250.804		-8.244		33	0.214095		33	0.510571
	34	200.355	210.528	172.012	258.501		-10.173		34	0.167713		34	0.498144
	35	193.94	202.563	166.618	246.85		-8.623		35	0.204982		35	0.501652
	36	195.135	204.187	169.105	252.99		-9.052		36	0.194667		36	0.496829
	37	199.665	209.194	168.634	255.418		-9.529		37	0.183197		37	0.483455
	38	199.52	209.131	172.933	267.059		-9.611		38	0.181226		38	0.473759
	39	197.455	207.579	167.558	257.356		-10.124		39	0.168891		39	0.46765
	40	195.279	201.831	161.446	249.712		-6.552		40	0.254779		40	0.446455
	41	200.706	204.765	167.266	255.891		-4.059		41	0.314723		41	0.470772
	42	195.948	201.705	166.346	248.654		-5.757		42	0.273895		42	0.491732
	43	201.047	206.205	165.781	251.008		-5.158		43	0.288297		43	0.477497
	44	201.618	205.451	162.71	252.168		-3.833		44	0.320157		44	0.447826
	45	206.436	205.25	158.419	249.213		1.186		45	0.440838		45	0.422932
	46	205.459	203.11	163.743	255.811		2.349		46	0.468802		46	0.443069
	47	204.832	204.305	163.109	257.626		0.527		47	0.424992		47	0.431801
	48	212.736	208.68	163.472	263.976		4.056		48	0.509846		48	0.414044
	49	216.236	210.772	166.765	272.748		5.464		49	0.543701		49	0.41167
	50	217.373	211.055	169.711	279.017		6.318		50	0.564236		50	0.414121
	51	211.964	207.963	165.411	272.307		4.001		51	0.508524		51	0.403431
	52	211.568	206.507	166.102	272.024		5.061		52	0.534011		52	0.4091
	53	215.964	207.945	163.611	267.7		8.019		53	0.605136		53	0.403856
	54	209.986	206.404	162.165	268.109		3.582		54	0.498449		54	0.39219
	55	203.923	201.64	159.706	266.157		2.283		55	0.467215		55	0.379753
	56	211.846	207.189	161.919	268.271		4.657		56	0.524297		56	0.389952
	57	218.88	211.152	159.5	270.54		7.728		57	0.598139		57	0.366444
	58	203.745	206.105	154.938	260.064		-2.36		58	0.355575		58	0.360884
	59	215.323	208.118	153.733	262.262		7.205		59	0.585563		59	0.345776
	60	218.227	209.309	154.591	266.587		8.918		60	0.626752		60	0.341109
	61	223.995	212.879	155.378	277.721		11.116		61	0.679603		61	0.320726
	62	226.005	215.68	153.015	273.271		10.325		62	0.660583		62	0.314195
	63	227.091	214.875	148.619	268.307		12.216		63	0.706052		63	0.293687
	64	225.781	213.616	147.658	262.973		12.165		64	0.704826		64	0.298241
	65	228.723	211.143	144.527	268.867		17.58		65	0.835028		65	0.263036
	66	231.455	212.057	143.241	268.527		19.398		66	0.878742		66	0.254398
	67	243.04	218.671	144.135	287.395		24.369		67	0.998269		67	0.229582
	68	247.277	224.386	144.527	287.877		22.891		68	0.962731		68	0.231364
	69	237.754	216.132	142.468	273.317		21.622		69	0.932218		69	0.240502
	70	240.04	219.046	141.664	266.759		20.994		70	0.917118		70	0.246156
	71	237.777	216.761	139.114	261.503		21.016		71	0.917646		71	0.236603
	72	234.755	221.746	138.66	261.595		13.009		72	0.72512		72	0.232988
	73	231.732	213.154	137.584	253.442		18.578		73	0.859025		73	0.239659
	74	240.192	219.546	141.718	263.584		20.646		74	0.90875		74	0.25241
	75	239.846	215.405	139.221	270.883		24.441		75	1		75	0.221609
	76	244.829	226.623	138.688	260.559		18.206		76	0.850081		76	0.235051
	77	231.711	214.063	136.633	251.356		17.648		77	0.836664		77	0.235942
	78	242.348	227.775	138.177	254.013		14.573		78	0.762726		78	0.243337
	79	243.181	219.622	139.534	267.874		23.559		79	0.978792		79	0.228716
	80	239.013	219.183	138.258	262.738		19.83		80	0.889129		80	0.227953
	81	229.904	210.099	136.244	253.782		19.805		81	0.888528		81	0.228175
	82	233.457	216.913	139.385	268.541		16.544		82	0.810118		82	0.226539
	83	226.1	208.408	135.91	251.885		17.692		83	0.837722		83	0.228986
	84	221.915	211.464	137.522	258.948		10.451		84	0.663613		84	0.228945
	85	215.692	208.632	136.884	257.302		7.06		85	0.582077		85	0.226894
	86	213.629	208.893	136.475	258.523		4.736		86	0.526197		86	0.221556
	87	205.933	204.844	135.69	249.848		1.089		87	0.438505		87	0.231043
	88	201.594	204.933	135.646	252.52		-3.339		88	0.332035		88	0.225645
	89	209.863	211.899	134.99	250.087		-2.036		89	0.363365		89	0.224754
	90	205.947	208.14	134.747	247.066		-2.193		90	0.35959		90	0.228478
	91	224.245	222.492	137.715	260.783		1.753		91	0.454471		91	0.227208
	92	213.913	214.97	136.044	259.521		-1.057		92	0.386905		92	0.216521
	93	216.832	215.746	137.977	265.892		1.086		93	0.438433		93	0.220594
	94	214.815	214.813	138.48	262.102		0.002		94	0.412369		94	0.230731
	95	209.18	207.456	136.405	250.198		1.724		95	0.453774		95	0.236318
	96	213.14	210.675	136.795	258.043		2.465		96	0.471591		96	0.224885
	97	216.932	219.492	136.888	248.133		-2.56		97	0.350766		97	0.244538
	98	212.53	211.325	136.727	250.798		1.205		98	0.441295		98	0.23781
	99	212.68	207.98	136.544	256.741		4.7		99	0.525331		99	0.225215
	100	214.952	218.098	135.189	260.243		-3.146		100	0.336676		100	0.208756
	101	216.02	214.734	136.417	262.992		1.286		101	0.443242		101	0.213675
	102	223.611	214.727	139.78	277.492		8.884		102	0.625935		102	0.215469
	103	222.822	213.095	139.347	277.606		9.727		103	0.646205		103	0.212369
	104	224.409	215.53	138.466	272.843		8.879		104	0.625815		104	0.213283
	105	219.731	210.955	137.619	275.379		8.776		105	0.623338		105	0.203736
	106	222.808	216.538	136.828	263.29		6.27		106	0.563082		106	0.21628
	107	218.332	211.587	136.907	274.028		6.745		107	0.574503		107	0.200704
	108	215.01	212.742	137.931	268.557		2.268		108	0.466854		108	0.216019
	109	211.638	210.73	135.834	258.583		0.908		109	0.434153		109	0.216467
	110	215.99	217.04	137.992	259.462		-1.05		110	0.387074		110	0.231666
	111	214.311	212.839	136.94	254.028		1.472		111	0.447715		111	0.233334
	112	207.635	210.016	138.505	258.6		-2.381		112	0.35507		112	0.237208
	113	213.163	213.786	139.285	260.626		-0.623		113	0.397341		113	0.239501
	114	201.554	206.567	138.487	270.106		-5.013		114	0.291784		114	0.2176
	115	197.727	200.806	139.041	260.787		-3.079		115	0.338287		115	0.23734
	116	198.693	199.849	139.197	265.086		-1.156		116	0.384525		116	0.230942
	117	203.648	206.944	138.565	262.679		-3.296		117	0.333069		117	0.230368
	118	207.136	211.72	138.705	258.616		-4.584		118	0.302099		118	0.238734
	119	196.953	200.616	136.655	257.99		-3.663		119	0.324244		119	0.223885

[truncated: 28 more sheets: exp1-endosome11, exp1-endosome12, exp1-endosome13, exp1-endosome14, exp1-endosome15, exp1-endosome16, exp1-endosome17, exp1-endosome18, exp1-time, exp1-aligned, exp2-background, exp2-endosome1, exp2-endosome2, exp2-endosome3, exp2-endosome4, exp2-endosome5, exp2-endosome6, exp2-endosome7, exp2-endosome8, exp2-endosome9 …]
