# Supplementary material for: A novel live-cell imaging assay reveals regulation of endosome maturation
Source: eLife. 2021 Nov 30;10:e70982. doi: 10.7554/eLife.70982 (PMC8635980; doi:10.7554/eLife.70982)
Supplement: Figure 12—figure supplement 1—source data 1. [file elife-70982-fig12-figsupp1-data1.xls]

## Sheet: clones 1 and 2
	Ct (ccz1 exon 4)	Ct(actin1)	DCt(1)	DDCt(1)	Value		Average	StDev
parent (average)	19.6865	16.2386	3.44785	0	1
parent	19.5663	16.2789	3.28735	-0.160494	1.11767	parent	1.01933	0.231851
parent	19.8705	16.0163	3.85421	0.406366	0.754521
parent	19.6226	16.4207	3.20197	-0.245872	1.18581
WT1	19.3981	16.2604	3.1377	-0.310144	1.23983	WT1	1.16149	0.202444
WT1	19.2803	15.7302	3.55009	0.10224	0.931586
WT1	18.8556	15.8007	3.05491	-0.392934	1.31306
WT2	19.1711	16.1105	3.06064	-0.387207	1.30786	WT2	1.18667	0.252105
WT2	19.554	15.9491	3.60489	0.157046	0.896859
WT2	19.4446	16.4354	3.00923	-0.438614	1.3553
KO1	26.2748	16.7918	9.48304	6.03519	0.0152485	KO1	0.0154189	0.00176693
KO1	26.4564	17.1526	9.30386	5.85602	0.0172649
KO1	26.3764	16.7434	9.63297	6.18512	0.0137434
KO2	23.5093	16.8092	6.70019	3.25235	0.104941	KO2	0.100736	0.0129001
KO2	23.411	16.8304	6.58064	3.1328	0.114008
KO2	23.5304	16.4963	7.03408	3.58624	0.0832596
	Ct (ccz1 exon 12)	Ct(actin1)	DCt(1)	DDCt(1)	Value		Average	StDev
parent (average)	20.1241	16.2386	3.88548	0	1
parent	20.2327	16.2789	3.9538	0.0683206	0.953748	parent	1.01551	0.222015
parent	20.169	16.0163	4.15271	0.267234	0.830911
parent	19.9706	16.4207	3.54992	-0.335555	1.26186
WT1	19.3698	16.2604	3.10935	-0.776127	1.71253	WT1	1.25803	0.393936
WT1	19.5947	15.7302	3.86446	-0.0210158	1.01467
WT1	19.6201	15.8007	3.81937	-0.0661103	1.04689
WT2	19.8181	16.1105	3.7076	-0.177874	1.13122	WT2	1.5501	0.469241
WT2	19.2868	15.9491	3.33763	-0.547851	1.46191
WT2	19.2802	16.4354	2.84481	-1.04067	2.05718
KO1	34.9099	16.7918	18.1181	14.2326	5.19453e-05	KO1	5.03779e-05	1.03293e-05
KO1	35.0667	17.1526	17.9142	14.0287	5.98339e-05
KO1	35.262	16.7434	18.5186	14.6331	3.93544e-05
KO2	24.0592	16.8092	7.25	3.36452	0.0970906	KO2	0.0823019	0.0222888
KO2	24.0521	16.8304	7.22169	3.33621	0.0990148
KO2	24.6808	16.4963	8.1845	4.29902	0.0508003

## Sheet: clone3
	Ct (ccz1 exon 4)	Ct(actin1)	DCt(1)	DDCt(1)	Value		Average	StDev
parent (average)	24.7991	25.025	-0.225892	0	1
WT3	24.8557	25.0215	-0.165878	0.0600141	0.959255	WT3	1.00067	0.0449874
WT3	24.8249	25.1192	-0.294266	-0.0683734	1.04853
WT3	24.7167	24.9342	-0.217533	0.00835927	0.994223
KO3	27.8782	22.2266	5.65155	5.87744	0.0170103	KO3	0.0170356	0.000485411
KO3	27.9615	22.3536	5.60788	5.83377	0.0175331
KO3	27.9654	22.2754	5.68998	5.91587	0.0165633
	Ct (ccz1 exon 12)	Ct(actin1)	DCt(1)	DDCt(1)	Value		Average	StDev
parent (average)	24.9241	25.025	-0.100847	0	1
WT3	24.9156	25.0215	-0.10589	-0.00504367	1.0035	WT3	1.00135	0.0634868
WT3	24.9292	25.1192	-0.189976	-0.0891291	1.06373
WT3	24.9275	24.9342	-0.00667381	0.0941728	0.936809
KO3	27.9254	22.2266	5.69874	5.79958	0.0179536	KO3	0.0175091	0.00093398
KO3	28.0377	22.3536	5.68401	5.78485	0.0181379
KO3	28.1016	22.2754	5.82616	5.92701	0.0164359
