# Supplementary material for: A novel live-cell imaging assay reveals regulation of endosome maturation
Source: eLife. 2021 Nov 30;10:e70982. doi: 10.7554/eLife.70982 (PMC8635980; doi:10.7554/eLife.70982)
Supplement: Figure 12—source data 1. [file elife-70982-fig12-data1.xlsx]

## Sheet: exp2-WT-1
endosome 1						dMFI			%dMFI
frame #	Rab5(rim)	Rab5(background)	YFP(lumen)	CFP(lumen)		Rab5		frame #	Rab5	YFP/CFP
1	412.782	403.71	189.607	295.634		9.072		1	0.214028	0.468389
2	413.191	396.458	184.532	283.301		16.733		2	0.280365	0.472558
3	423.162	399.708	186.128	290.667		23.454		3	0.338563	0.461828
4	391.715	384.14	180.91	289.119		7.575		4	0.201065	0.435966
5	407.657	398.954	180.542	284.759		8.703		5	0.210833	0.444996
6	396.035	386.14	177.678	281.13		9.895		6	0.221154	0.437477
7	378.214	376.434	172.235	269.97		1.78		7	0.150885	0.433858
8	387.221	391.592	164.193	258.325		-4.371		8	0.0976231	0.412998
9	365.257	367.612	159.934	248.873		-2.355		9	0.11508	0.410344
10	383.171	380.607	161.38	253.627		2.564		10	0.157674	0.406703
11	383.271	384.949	157.277	241.12		-1.678		11	0.120942	0.414502
12	375.743	383.357	156.548	239.524		-7.614		12	0.0695415	0.41396
13	366.023	379.846	157.007	237.938		-13.823		13	0.0157769	0.423034
14	403.944	417.04	160.701	259.243		-13.096		14	0.0220721	0.386161
15	380.105	393.917	159.769	256.115		-13.812		15	0.0158722	0.388116
16	386.559	392.044	157.745	251.692		-5.485		16	0.0879768	0.385867
17	356.882	359.456	152.159	243.572		-2.574		17	0.113184	0.366791
18	355.204	352.495	152.76	238.615		2.709		18	0.15893	0.386361
19	376.528	358.185	152.401	247.548		18.343		19	0.294307	0.357614
20	369.831	359.875	150.859	233.026		9.956		20	0.221682	0.38855
21	357.598	357.929	155.898	243.766		-0.331		21	0.132606	0.395275
22	368.061	343.522	151.942	232.949		24.539		22	0.347959	0.397986
23	402.333	355.25	153.854	244.372		47.083		23	0.54317	0.377624
24	449.555	363.522	151.411	240.887		86.033		24	0.880443	0.368672
25	464.734	364.894	147.226	243.621		99.84		25	1	0.328298
26	443.891	349.733	147.468	247.532		94.158		26	0.950799	0.320436
27	434.917	364.207	153.088	258.19		70.71		27	0.747759	0.335834
28	416.167	366.793	151.679	257.044		49.374		28	0.563008	0.328624
29	371.689	361.511	154	274.891		10.178		29	0.223605	0.306459
30	366.758	360.13	150.307	267.131		6.628		30	0.192865	0.297816
31	348.927	353.818	150.107	272.705		-4.891		31	0.0931203	0.286021
32	344.853	349.18	148.649	284		-4.327		32	0.0980041	0.258278
33	336.812	341.482	147.488	278.5		-4.67		33	0.095034	0.259865
34	334.438	337.744	153.721	309.372		-3.306		34	0.106845	0.250659
35	348.938	352.452	154.477	295.488		-3.514		35	0.105044	0.274129
36	345.17	352.089	156.977	294.837		-6.919		36	0.0755596	0.289023
37	354.554	350.304	154.035	302.442		4.25		37	0.172273	0.261601
38	344.546	353.669	151.9	289		-9.123		38	0.0564749	0.26954
39	344.556	356.087	155.086	295.457		-11.531		39	0.0356237	0.277551
40	332.99	348.635	153.13	308.551		-15.645		40	0	0.248668
41	349.24	360.628	155.435	305.696		-11.388		41	0.0368619	0.264479
42	338.577	346.769	156.681	303.783		-8.192		42	0.0645365	0.273759
43	342.471	340.468	154.42	300.145		2.003		43	0.152816	0.266926
44	341.8	335.382	150.5	291.65		6.418		44	0.191046	0.257571
45	333.25	336.521	155.486	307.189		-3.271		45	0.107148	0.262689
46	353.17	341.028	157.189	304.432		12.142		46	0.240611	0.275503

## Sheet: exp2-WT-2
endosome 2						dMFI			%dMFI
frame #	Rab5(rim)	Rab5(background)	YFP(lumen)	CFP(lumen)		Rab5		frame #	Rab5	YFP/CFP
1	422.553	426.75	183.572	339.692		-4.197		1	0.374295	0.349688
2	387.112	397.172	177.481	302.538		-10.06		2	0.317973	0.386487
3	392.974	402.76	177.199	306.477		-9.786		3	0.320605	0.377064
4	389.776	403.308	169.023	284.273		-13.532		4	0.284619	0.378223
5	408.545	424.613	168.031	307.289		-16.068		5	0.260257	0.327793
6	401.16	428.542	162.52	297.778		-27.382		6	0.15157	0.314699
7	403.692	428.547	161.08	284.556		-24.855		7	0.175846	0.330746
8	410.699	443.83	159.529	286.178		-33.131		8	0.0963428	0.318551
9	379.394	405.681	155.387	268.387		-26.287		9	0.162089	0.328496
10	380.177	404.786	156.312	259.789		-24.609		10	0.178209	0.354392
11	390.598	419.25	153.805	259.527		-28.652		11	0.13937	0.337688
12	381.317	417.295	154.629	267.391		-35.978		12	0.0689933	0.325669
13	377.457	409.977	150.305	264.828		-32.52		13	0.102212	0.30238
14	402.099	429.871	154.109	272.201		-27.772		14	0.147824	0.312396
15	392.721	419.759	153.867	276.952		-27.038		15	0.154875	0.301738
16	406.206	422.631	154.512	263.14		-16.425		16	0.256828	0.334224
17	388.267	400.051	149.095	258.137		-11.784		17	0.301411	0.308062
18	371.54	390.724	148.212	247.016		-19.184		18	0.230324	0.327324
19	364.466	385.884	150.237	243.047		-21.418		19	0.208863	0.353284
20	352.352	370.435	150	246.658		-18.083		20	0.2409	0.341795
21	355.977	365.647	154.18	253.896		-9.67		21	0.321719	0.354078
22	348.125	360.177	153.576	247.028		-12.052		22	0.298837	0.367922
23	367.784	369.776	154.56	251.421		-1.992		23	0.395477	0.363287
24	376.159	379.461	155.291	249.633		-3.302		24	0.382893	0.373541
25	361.024	378.441	150.422	242.664		-17.417		25	0.247298	0.355793
26	354.354	385.155	151.223	249.504		-30.801		26	0.118726	0.343655
27	372.811	388.973	151.707	254.691		-16.162		27	0.259354	0.334359
28	377.299	388.841	154.328	249.297		-11.542		28	0.303736	0.367305
29	376.833	384.08	154.089	261.351		-7.247		29	0.344996	0.33542
30	404.914	393.75	153.162	255.324		11.164		30	0.521859	0.34322
31	429.351	403.025	151.286	266.734		26.326		31	0.667512	0.305047
32	451.122	390.185	140.682	263.219		60.937		32	1	0.240738
33	396.155	372.955	139.729	253.161		23.2		33	0.637482	0.251366
34	368.993	386.24	143.182	288.594		-17.247		34	0.248931	0.21995
35	356.814	381.587	143.548	285.639		-24.773		35	0.176633	0.225904
36	354.868	380.573	145.94	295.086		-25.705		36	0.16768	0.227336
37	348.684	374.568	142.947	280.762		-25.884		37	0.165961	0.228925
38	348.265	377.714	143.258	283.848		-29.449		38	0.131714	0.226582
39	336.917	366.984	143.349	274.144		-30.067		39	0.125777	0.24097
40	342.273	374.532	144.349	265.705		-32.259		40	0.10472	0.261099
41	367.53	410.69	145.27	285.839		-43.16		41	0	0.235719
42	356.985	393.429	144.496	288.453		-36.444		42	0.0645167	0.227704
43	351.674	384.065	141.891	285.314		-32.391		43	0.103452	0.216606
44	347.545	380.67	138.486	271.24		-33.125		44	0.0964005	0.214324
45	361.455	393.941	142.89	296.13		-32.486		45	0.102539	0.209187
46	363.553	395.505	143.404	285.562		-31.952		46	0.107669	0.225162
47	358.932	385.106	144.014	287.637		-26.174		47	0.163175	0.225989
48	357.848	387.181	143.61	293.925		-29.333		48	0.132828	0.215789
49	354.742	377.915	143.096	292.644		-23.173		49	0.192004	0.214451
50	344.906	373.933	144.048	277.524		-29.027		50	0.135768	0.24026
51	347.033	374.426	141.433	307.615		-27.393		51	0.151464	0.189149

## Sheet: exp2-WT-3
endosome 3						dMFI			%dMFI
frame #	Rab5(rim)	Rab5(background)	YFP(lumen)	CFP(lumen)		Rab5		frame #	Rab5	YFP/CFP
1	415.571	410.59	180.56	265.733		4.981		1	0.255905	0.501284
2	387.942	392.854	170.098	259.453		-4.912		2	0.174736	0.450652
3	388.974	392.854	169.458	245.138		-3.88		3	0.183203	0.495305
4	385.429	391.901	167.356	247.249		-6.472		4	0.161937	0.471505
5	406.635	403.939	168.609	248.844		2.696		5	0.237158	0.475247
6	413.667	414.042	168.293	248.978		-0.375		6	0.211961	0.472413
7	414.667	419.948	168.956	251.022		-5.281		7	0.171708	0.470189
8	422.85	438.13	168.727	254.727		-15.28		8	0.0896694	0.456082
9	412.48	433.962	165.074	246.083		-21.482		9	0.0387837	0.45829
10	409.349	435.558	162.222	234.736		-26.209		10	0	0.477901
11	406.118	422.428	160.958	235.176		-16.31		11	0.0812186	0.465634
12	396.095	411.175	160.625	230.021		-15.08		12	0.0913104	0.483607
13	376.669	387.125	161.833	234.547		-10.456		13	0.129249	0.475403
14	399.345	418.47	161.281	242.464		-19.125		14	0.0581223	0.441544
15	376.299	392.95	159.723	241.74		-16.651		15	0.0784208	0.431774
16	399.236	411.85	157.644	256.751		-12.614		16	0.111543	0.371384
17	384.993	403.51	154.551	240.814		-18.517		17	0.0631107	0.393843
18	401.542	406.285	151.627	241.802		-4.743		18	0.176123	0.367715
19	382.814	400.27	152.892	251.59		-17.456		19	0.071816	0.350626
20	373.786	393.98	152.229	249.241		-20.194		20	0.0493514	0.351822
21	413.864	395.24	158.59	258.952		18.624		21	0.367842	0.372277
22	464.184	385.536	149.25	250.673		78.648		22	0.860323	0.326152
23	494.11	398.438	150.404	246.224		95.672		23	1	0.346004
24	452.757	388.24	149.853	241.154		64.517		24	0.744382	0.355542
25	424.257	382.109	150.09	246.705		42.148		25	0.56085	0.342356
26	373.074	382.938	146.994	262.814		-9.864		26	0.134106	0.2841
27	386.551	397.135	147.846	263.103		-10.584		27	0.128199	0.289299
28	381.522	400.891	145.744	264.308		-19.369		28	0.0561203	0.272886
29	391.735	414.527	145.856	311.459		-22.792		29	0.0280355	0.207962
30	382.598	398.88	144.474	328.876		-16.282		30	0.0814483	0.184565
31	374.839	394.608	143.104	343.235		-19.769		31	0.0528384	0.166951
32	362.992	376.636	143.991	340.384		-13.644		32	0.103092	0.172998
33	347.775	366.597	144.029	342.038		-18.822		33	0.0606083	0.171905
34	373.345	387.512	151.773	361.959		-14.167		34	0.0988013	0.189396
35	390.769	407.5	152.686	359.5		-16.731		35	0.0777644	0.195035
36	378.3	386.276	153.776	354.948		-7.976		36	0.149597	0.203277
37	369.97	382.096	151.397	402.19		-12.126		37	0.115547	0.161555
38	394.771	403.658	155.077	401.865		-8.887		38	0.142122	0.174566

## Sheet: exp2-WT-4
endosome 4						dMFI			%dMFI
frame #	Rab5(rim)	Rab5(background)	YFP(lumen)	CFP(lumen)		Rab5		frame #	Rab5	YFP/CFP
1	224.919	238.365	321.468	961.173		-13.446		1	0.205407	0.25582
2	237.819	241.19	306.169	1062.96		-3.371		2	0.671821	0.212213
3	245.066	241.348	301.899	1029.12		3.718		3	1	0.215397
4	239.27	238.123	280.12	1078.4		1.147		4	0.880978	0.181773
5	240.48	249.186	289.981	1045.29		-8.706		5	0.424841	0.198843
6	242.847	252.98	273	1219.58		-10.133		6	0.35878	0.152094
7	242.056	252.48	293.215	1012.69		-10.424		7	0.345308	0.209666
8	233.5	244.1	276.282	929.141		-10.6		8	0.33716	0.210384
9	240.257	243.76	252.621	1014.84		-3.503		9	0.66571	0.164052
10	228.438	239.035	260.847	989.661		-10.597		10	0.337299	0.17818
11	235.701	248.225	258.847	930.774		-12.524		11	0.24809	0.18859
12	242.865	251.795	275.656	889.016		-8.93		12	0.414472	0.220481
13	236.083	247.99	270.757	862.424		-11.907		13	0.276654	0.221771
14	246.986	250.3	240.011	823.113		-3.314		14	0.67446	0.190663
15	250.816	248.176	221.596	889.471		2.64		15	0.950095	0.150549
16	242.02	242.207	232.667	842.005		-0.187		16	0.819221	0.175607
17	239.553	238.37	222.505	804.19		1.183		17	0.882644	0.170497
18	232.5	236.481	201.644	785.48		-3.981		18	0.643581	0.144142
19	221.684	236.275	192.462	874.962		-14.591		19	0.1524	0.115087
20	227.321	244.552	198.209	1020.04		-17.231		20	0.0301838	0.102989
21	222.128	234.863	200.853	1246.39		-12.735		21	0.238322	0.0847214
22	216.493	227.235	201.14	1206.18		-10.742		22	0.330587	0.0881061
23	210.772	225.875	204.974	1162.47		-15.103		23	0.128698	0.0954433
24	218.348	236.064	201.973	1301.47		-17.716		24	0.00773112	0.0817322
25	206.208	223.182	192.817	1286.38		-16.974		25	0.0420814	0.0749692
26	198.438	216.321	169.942	1354.09		-17.883		26	0	0.0524109
27	203.929	217.137	177.93	1337.93		-13.208		27	0.216425	0.0596355
28	204.75	218.845	180.895	1362.98		-14.095		28	0.175362	0.0608144
29	200.491	209.667	172.86	1452.92		-9.176		29	0.403083	0.0507206
30	204.167	215.825	176.3	1611.69		-11.658		30	0.288181	0.0476386
31	201.933	213.186	185.891	1588.2		-11.253		31	0.30693	0.0549083
32	208.021	219.566	173.365	1609.52		-11.545		32	0.293412	0.0457438
33	205.729	216.414	181.269	1756.19		-10.685		33	0.333225	0.0464717

## Sheet: exp2-WT-5
endosome 5						dMFI			%dMFI
frame #	Rab5(rim)	Rab5(background)	YFP(lumen)	CFP(lumen)		Rab5		frame #	Rab5	YFP/CFP
1	218.688	225.175	316.763	731.78		-6.487		1	0.623799	0.343336
2	222.921	227.333	326.197	784.409		-4.412		2	0.741044	0.330436
3	220.072	224.564	314.183	704.197		-4.492		3	0.736524	0.355031
4	216.875	221.814	305.923	773.966		-4.939		4	0.711267	0.304906
5	227.132	230.485	313.423	714.433		-3.353		5	0.800881	0.3477
6	227.908	231.672	316.048	729.856		-3.764		6	0.777658	0.343248
7	226.033	232.101	308.231	763.708		-6.068		7	0.647474	0.313286
8	223.91	225.967	310.4	750.089		-2.057		8	0.87411	0.323419
9	224.112	228.642	299.438	681.212		-4.53		9	0.734377	0.343401
10	225.942	229.406	301.391	680.453		-3.464		10	0.79461	0.347316
11	226.231	229.009	307.938	704.2		-2.778		11	0.833371	0.34443
12	233.776	239.104	306.773	745.382		-5.328		12	0.689287	0.320081
13	229.846	233.981	292.476	743.049		-4.135		13	0.756696	0.298505
14	236.724	237.061	297.329	864.667		-0.337		14	0.971296	0.256553
15	234.237	237.561	284.524	863.591		-3.324		15	0.80252	0.239816
16	235.875	235.704	283.819	925.689		0.171		16	1	0.220577
17	223.631	226.255	258.752	758.235		-2.624		17	0.842073	0.239029
18	223.39	229.368	244.352	751.531		-5.978		18	0.65256	0.218924
19	224.11	232.864	224.305	857.016		-8.754		19	0.495706	0.160785
20	223.75	232.75	217.961	897.844		-9		20	0.481806	0.144296
21	222.488	229.945	211.609	1010.04		-7.457		21	0.568991	0.119111
22	226.756	231.759	215.934	1073.12		-5.003		22	0.707651	0.115783
23	222.64	230.136	211.16	1091.93		-7.496		23	0.566787	0.108667
24	221.654	231.943	200.4	1145.95		-10.289		24	0.408973	0.0925363
25	214.3	224.079	197.298	1120.4		-9.779		25	0.43779	0.0918024
26	212.026	223.085	192.773	1130		-11.059		26	0.365465	0.0864762
27	218.112	229.548	192.139	1177.73		-11.436		27	0.344163	0.0819953
28	214.338	231.865	187.596	1231.17		-17.527		28	0	0.0739993
29	212.826	225.055	186.531	1304.5		-12.229		29	0.299356	0.0685421
30	214.333	229.31	187.379	1275.4		-14.977		30	0.144084	0.0709918
31	214.107	228.24	186	1288.88		-14.133		31	0.191773	0.0690019
32	215.229	229.168	191.169	1375.56		-13.939		32	0.202735	0.0683577
33	218.057	231.867	196.53	1447.25		-13.81		33	0.210024	0.0687035

## Sheet: exp2-WT-6
endosome 6						dMFI			%dMFI
frame #	Rab5(rim)	Rab5(background)	YFP(lumen)	CFP(lumen)		Rab5		frame #	Rab5	YFP/CFP
1	456.203	438.64	252.724	441.885		17.563		1	0.771683	0.451914
2	447.786	435.658	242.151	419.91		12.128		2	0.679361	0.449808
3	443.25	443.276	247.724	418.897		-0.026		3	0.472906	0.469646
4	438.722	421.37	240.034	397.096		17.352		4	0.768099	0.478681
5	482.167	453.575	256.819	427.367		28.592		5	0.959028	0.486028
6	498.819	467.815	262.819	442.768		31.004		6	1	0.481496
7	484.474	479.941	264.413	440.317		4.533		7	0.550348	0.490024
8	498.967	506.422	249.385	441.769		-7.455		8	0.346713	0.441856
9	458.112	458.534	242.615	422.279		-0.422		9	0.46618	0.44785
10	462.362	465.01	236.091	415.966		-2.648		10	0.428368	0.435567
11	452.625	474.809	229.587	429.808		-22.184		11	0.0965178	0.395756
12	441.546	469.412	223.904	432.019		-27.866		12	0	0.375069
13	451.077	473.981	217.756	419.311		-22.904		13	0.0842874	0.370529
14	435.917	445.604	223.111	439.533		-9.687		14	0.308799	0.363941
15	431.167	440.005	217.387	426.364		-8.838		15	0.323221	0.360951
16	464.756	473.165	218.693	449.591		-8.409		16	0.330508	0.339797
17	435.134	445.645	210.664	431.508		-10.511		17	0.294802	0.333843
18	439.293	443.945	209.641	438.113		-4.652		18	0.394326	0.323853
19	442.159	469.764	211.742	443.484		-27.605		19	0.0044335	0.324953
20	443.811	452.336	211.289	442.438		-8.525		20	0.328537	0.324608
21	403.019	411.967	205.827	429.253		-8.948		21	0.321352	0.320847
22	402.122	414.665	207.436	429.68		-12.543		22	0.260285	0.325524
23	397.669	414.89	204.979	437.969		-17.221		23	0.180822	0.309562
24	389.527	407.175	205.307	434.13		-17.648		24	0.173569	0.314314
25	387.311	403.085	200.234	437.63		-15.774		25	0.205402	0.29518
26	387.074	404.355	203.109	433.958		-17.281		26	0.179803	0.307592
27	384.75	403.985	197.526	433.047		-19.235		27	0.146611	0.290919
28	390.703	406.985	199.38	432.224		-16.282		28	0.196773	0.297518
29	397.412	410.285	201.635	433.781		-12.873		29	0.25468	0.303139
30	394.338	416.964	197.16	451.974		-22.626		30	0.0890097	0.273493
31	402.458	417.36	200.096	461.006		-14.902		31	0.220214	0.274839

## Sheet: exp2-WT-7
endosome 7						dMFI			%dMFI
frame #	Rab5(rim)	Rab5(background)	YFP(lumen)	CFP(lumen)		Rab5		frame #	Rab5	YFP/CFP
1	475.236	487.09	272.537	411.955		-11.854		1	0.49702	0.564183
2	481.896	501.645	264.588	437.226		-19.749		2	0.338578	0.495267
3	457.257	477.02	266.514	420.412		-19.763		3	0.338297	0.52884
4	460.033	472.412	255.99	403.413		-12.379		4	0.486484	0.52352
5	471.414	478.623	261.24	414.062		-7.209		5	0.590239	0.522433
6	480.308	484.099	265.009	425.564		-3.791		6	0.658833	0.515221
7	504.589	497.982	268.365	431.336		6.607		7	0.867507	0.516429
8	508.78	495.571	258.022	423.839		13.209		8	1	0.495475
9	517.78	515.636	254.859	427.066		2.144		9	0.777941	0.480216
10	520.543	520.5	252.762	416.738		0.043		10	0.735776	0.489703
11	529.677	540.468	249.023	428.355		-10.791		11	0.518353	0.459616
12	513.845	515.165	249.08	436.836		-1.32		12	0.708423	0.447681
13	544.143	536.786	242.617	420.193		7.357		13	0.882558	0.450918
14	490.962	492.406	247.724	436.431		-1.444		14	0.705934	0.444027
15	473.859	482.5	240.756	416.511		-8.641		15	0.5615	0.450252
16	491.199	512.849	240.382	419.049		-21.65		16	0.300427	0.445264
17	452.051	477.113	227.191	400.289		-25.062		17	0.231953	0.428306
18	445.982	467.427	219.508	387.234		-21.445		18	0.304542	0.420623
19	449.36	469.786	215.352	383.688		-20.426		19	0.324991	0.410707
20	426.413	439.237	209.758	377.246		-12.824		20	0.477553	0.399465
21	399.165	416.95	200.66	364.742		-17.785		21	0.377993	0.383035
22	384.709	404.799	196.744	359.952		-20.09		22	0.331735	0.374539
23	368.238	392.723	187.793	343.531		-24.485		23	0.243533	0.362283
24	373.855	401.964	183.805	336.56		-28.109		24	0.170804	0.355682
25	376.913	402.217	182.943	341.693		-25.304		25	0.227097	0.343826
26	357.858	377.595	180.435	342.375		-19.737		26	0.338819	0.331765
27	347.676	371.728	177.94	346.32		-24.052		27	0.252223	0.315321
28	356.795	389.47	177.997	346.566		-32.675		28	0.0791708	0.315232
29	356.849	393.469	177.024	345.427		-36.62		29	0	0.312568
30	356.378	376.85	176.688	361.551		-20.472		30	0.324068	0.290763
31	371.177	388.382	178.383	367.793		-17.205		31	0.389633	0.290289

## Sheet: exp2-WT-8
endosome 8						dMFI			%dMFI
frame #	Rab5(rim)	Rab5(background)	YFP(lumen)	CFP(lumen)		Rab5		frame #	Rab5	YFP/CFP
1	360.175	375.818	256.558	498.308		-15.643		1	0.167093	0.395395
2	398.197	395.272	254.752	520.482		2.925		2	0.529331	0.369318
3	401.477	388.853	261.08	558.971		12.624		3	0.718547	0.351554
4	380.667	392.521	267.363	540.014		-11.854		4	0.241011	0.382018
5	397.371	401.404	257.103	615.445		-4.033		5	0.393589	0.303935
6	388.468	399.989	247.536	576.125		-11.521		6	0.247508	0.309105
7	386.823	393.438	252.295	573.884		-6.615		7	0.343218	0.320985
8	370.323	384.983	247.268	535.464		-14.66		8	0.18627	0.33836
9	351.523	365.484	234.453	477.54		-13.961		9	0.199906	0.357072
10	355.167	368.766	242.73	561.102		-13.599		10	0.206969	0.308741
11	363.265	387.473	236.423	508.161		-24.208		11	0	0.334273
12	355.386	368.728	242.686	515.562		-13.342		12	0.211982	0.343732
13	355.742	374.38	243	515.358		-18.638		13	0.108664	0.344692
14	382.471	391.49	239.756	543.827		-9.019		14	0.296319	0.314243
15	369.544	385.891	233.141	511.051		-16.347		15	0.153358	0.323547
16	372.706	375.656	234.538	546.115		-2.95		16	0.414717	0.300472
17	367.897	377.703	225.737	526.949		-9.806		17	0.280965	0.293087
18	356	367.495	228.019	508.635		-11.495		18	0.248015	0.31252
19	371.043	374.036	232.88	535.283		-2.993		19	0.413879	0.304271
20	386.743	383.061	232.675	539.801		3.682		20	0.5441	0.300552
21	379.521	378.776	245.976	585.584		0.745		21	0.486802	0.299577
22	383.926	371.656	229.609	549.513		12.27		22	0.711641	0.286779
23	374.75	368.677	233.596	558.481		6.073		23	0.590745	0.28997
24	383.596	374.099	238.724	567.583		9.497		24	0.657543	0.295468
25	396.868	370.7	237.559	595.785		26.168		25	0.982774	0.275714
26	398.736	371.685	245.305	810.254		27.051		26	1	0.201804
27	389.75	366.285	223.638	804.893		23.465		27	0.930042	0.171966
28	360.465	352.205	213.254	785.847		8.26		28	0.633411	0.161369
29	352.607	354.663	200.518	782.572		-2.056		29	0.432158	0.143083
30	354.879	351.283	205.876	835.204		3.596		30	0.542422	0.140066

## Sheet: exp2-WT-9
endosome 9						dMFI			%dMFI
frame #	Rab5(rim)	Rab5(background)	YFP(lumen)	CFP(lumen)		Rab5		frame #	Rab5	YFP/CFP
1	344.672	355.483	252.402	464.629		-10.811		1	0.430568	0.421595
2	365.138	378.483	255.072	453.825		-13.345		2	0.379755	0.442919
3	350.552	369.39	245.979	452.722		-18.838		3	0.269606	0.417441
4	361.6	378.403	244.837	433.24		-16.803		4	0.310413	0.439407
5	361.258	373.42	242.384	523.83		-12.162		5	0.403477	0.336042
6	386.331	409.028	241	551.696		-22.697		6	0.192224	0.311429
7	369.379	393.92	229.768	537.107		-24.541		7	0.155247	0.295584
8	367.048	386.182	231.393	470.188		-19.134		8	0.263671	0.355848
9	348.363	362.739	218.33	441.634		-14.376		9	0.359081	0.346963
10	353.806	367.801	213.902	494.589		-13.995		10	0.366721	0.286895
11	362.815	381.426	212.786	468.67		-18.611		11	0.274158	0.304764
12	343.955	368.845	210.616	464.279		-24.89		12	0.148248	0.302383
13	347.862	374.006	212.804	466.959		-26.144		13	0.123103	0.306297
14	353.092	385.375	217.163	463.654		-32.283		14	0	0.321703
15	351.927	376.216	207.732	429.714		-24.289		15	0.1603	0.32643
16	363.516	380.228	216.145	478.161		-16.712		16	0.312238	0.306049
17	354.462	377.712	208.169	503.397		-23.25		17	0.181135	0.265628
18	366.5	384.304	208.706	518.507		-17.804		18	0.290341	0.257012
19	371.348	369.62	206.846	506.029		1.728		19	0.682007	0.260456
20	376.358	383.977	210.788	503.644		-7.619		20	0.494576	0.272198
21	387.308	369.722	200.875	556.721		17.586		21	1	0.217049
22	376.553	376.038	205.803	525.299		0.515		22	0.657683	0.245682
23	352.727	353.902	180.066	541.664		-1.175		23	0.623794	0.175937
24	348.311	358.288	170.788	680.664		-9.977		24	0.447292	0.116302
25	348.341	350.679	158.182	615.504		-2.338		25	0.600473	0.106257
26	344.759	359.959	156.031	759.594		-15.2		26	0.342558	0.0791677
27	332.742	344.017	152.808	834.856		-11.275		27	0.421264	0.0664133
28	331.325	339.199	151.712	875.048		-7.874		28	0.489462	0.0614593

## Sheet: exp2-WT-10
endosome 10						dMFI			%dMFI
frame #	Rab5(rim)	Rab5(background)	YFP(lumen)	CFP(lumen)		Rab5		frame #	Rab5	YFP/CFP
14	514.672	532.599	280.577	592.258		-17.927		14	0.0118419	0.367887
15	523.457	525.465	273.268	623.794		-2.008		15	0.297898	0.330719
16	488.935	503.287	271.075	556.312		-14.352		16	0.0760827	0.376321
17	459.179	476.839	256.209	519.256		-17.66		17	0.0166397	0.374043
18	445.804	452.619	265.826	532.651		-6.815		18	0.211518	0.385073
19	446.592	455.977	273.106	526.442		-9.385		19	0.165337	0.408578
20	472.043	490.267	268.639	521.619		-18.224		20	0.00650494	0.402438
21	451.897	470.483	260.361	500.052		-18.586		21	0	0.403481
22	488.553	484.332	271.234	549.869		4.221		22	0.409829	0.382262
23	468.03	467.984	264.796	525.825		0.046		23	0.334807	0.388964
24	469.182	464.44	268.774	495.314		4.742		24	0.419191	0.430628
25	462.117	456.45	257.54	481.871		5.667		25	0.435813	0.415786
26	457.734	451.922	258.177	473.702		5.812		26	0.438419	0.427031
27	468.109	453.944	257.137	484.839		14.165		27	0.588518	0.41136
28	452.031	444.089	249.452	534.54		7.942		28	0.476694	0.34431
29	456.133	446.844	240.653	452.935		9.289		29	0.500898	0.401417
30	453.947	449.989	244.504	472.839		3.958		30	0.405103	0.389851
31	433.295	425.918	237.818	481.066		7.377		31	0.466541	0.362825
32	445.182	427.5	241.701	478.423		17.682		32	0.651716	0.376148
33	481.841	444.777	239.277	498.526		37.064		33	1	0.350112
34	427.642	416.33	237.24	499.885		11.312		34	0.537251	0.343583
35	438.911	434.411	248.907	477.081		4.5		35	0.414843	0.397444
36	422.758	417.295	236.298	481.298		5.463		36	0.432147	0.358446
37	413.833	425.312	232.25	488.76		-11.479		37	0.127709	0.340459
38	425.058	430.557	220.865	475.962		-5.499		38	0.235166	0.320989
39	427.786	434.97	220.826	496.023		-7.184		39	0.204888	0.303987
40	464.545	447.827	223.965	494.279		16.718		40	0.634394	0.313661
41	485.946	498.304	221.093	527.57		-12.358		41	0.111914	0.28139
42	467.223	466.863	221.767	533.756		0.36		42	0.340449	0.278843
43	457.565	471.269	210.043	511.657		-13.704		43	0.0877269	0.264821
44	484.593	484.03	205.662	503.4		0.563		44	0.344097	0.259171
45	465.769	464.305	210.325	534.413		1.464		45	0.360288	0.251125
46	437.856	452.949	202.516	529.734		-15.093		46	0.0627673	0.235129

[truncated: 168 more sheets: exp2-WT-11, exp2-WT-12, exp2-WT-13, exp2-WT-14, exp2-WT-15, exp2-WT-16, exp2-WT-17, exp2-WT-18, exp2-WT-19, exp2-WT-20, exp2-KO-1, exp2-KO-2, exp2-KO-3, exp2-KO-4, exp2-KO-5, exp2-KO-6, exp2-KO-7, exp2-KO-8, exp2-KO-9, exp2-KO-10 …]
