# Supplementary material for: A novel live-cell imaging assay reveals regulation of endosome maturation
Source: eLife. 2021 Nov 30;10:e70982. doi: 10.7554/eLife.70982 (PMC8635980; doi:10.7554/eLife.70982)
Supplement: Figure 13—source data 1. [file elife-70982-fig13-data1.xlsx]

## Sheet: exp1
lysosomes
		WT untreated (10 cells)					KO untreated (7 cells)					rescue untreated (5 cells)						background	YFP	CFP
			YFP	CFP	ratio			YFP	CFP	ratio			YFP	CFP	ratio				105	115
			113.278	171	0.147821			224.803	922.841	0.1483			142.5	511.375	0.0946074
			123.188	250.531	0.134198			318.245	1147.96	0.206441			126.438	330.062	0.0996829
			115.188	226.938	0.0910147			317	1333.87	0.173932			154.333	411.167	0.166572
			108.167	191	0.0416711			373.11	1175.7	0.252768			178.917	441.5	0.226392
			109.667	167.667	0.0886134			468.529	1042.5	0.391945			134.812	418.688	0.0981665
			109.167	172.5	0.0724696			252.65	1047.96	0.15826			141.706	506.647	0.0937222
			113.5	167.375	0.162291			237.818	1082.35	0.137301			160.062	490.062	0.146808
			108.917	158.75	0.0895314			506.892	2840.6	0.147451			143.375	351.75	0.162091
			112	165.688	0.1381			289.12	1591.4	0.124708			136.1	286.35	0.1815
			111.857	181.667	0.102854			285.528	2651.31	0.0711773			147.095	486.381	0.113347
			115.071	198.714	0.120302			332.163	3495.5	0.0671981			135	327.875	0.140928
			117.231	208.385	0.130974			309.109	2424.99	0.0883592			154.569	422.225	0.161344
			114.167	176.417	0.149258			411.253	4050.34	0.0778212			134.062	301.562	0.155777
			170.423	346.846	0.282183			463.837	4053.57	0.0911085			140.71	295.449	0.197895
			116.182	181.818	0.16735			217.311	840.564	0.154791			144.25	283.625	0.232765
			111.682	194.705	0.0838341			231.274	878.295	0.165433			155.125	380.125	0.189062
			110.654	143.192	0.200553			288.409	1260.25	0.160147			147.333	303.25	0.224876
			113.714	171.381	0.154556			230.322	952.621	0.149617			167.583	651.25	0.116705
			116.875	201.562	0.137185			198.308	690.413	0.162158			194.917	530.417	0.21645
			123.417	224.417	0.168319			265.638	1300.06	0.135553			173.692	586.577	0.145664
			113.429	192.571	0.108662			241.825	1018.32	0.151469			146.448	538.276	0.0979219
			111.962	163.654	0.143092			312.471	1405.39	0.160782			143.194	313.452	0.19246
			108.333	165.917	0.0654595			285.366	1360.8	0.144779			158.25	435.95	0.165914
			115.094	212.031	0.104029			263.229	1084.81	0.163154			164.125	391.5	0.213834
			118.4	190.85	0.176664			218.33	700.5	0.193561			156.938	351.625	0.219495
			113.462	192.731	0.108863			191.942	605.36	0.177302			136.125	331.625	0.143681
			116.882	180.059	0.182634			186.202	326.644	0.383673			174.5	368.583	0.274072
			120.2	210.85	0.158581			230.429	780.371	0.18851			145.219	349.875	0.171236
			123.25	213.75	0.18481			163.714	457.56	0.171398			144.154	316.808	0.194016
			133.941	240.882	0.229906			150.275	390.05	0.164606			142.062	318.25	0.182347
			138.095	292.667	0.186275			135.878	458.904	0.0897867			118.95	267.65	0.0913855
			122.55	215.75	0.174194			198.46	1273.61	0.0806654			128.25	325.417	0.110495
			145.387	280.129	0.244578			193.757	992.243	0.101177			127.156	266.562	0.146184
			132.971	248.5	0.209521			194.83	983.339	0.10345			135.062	279.938	0.182262
			151.095	285.952	0.269637			174.953	835.406	0.0971022			129.094	316.312	0.119685
			137.938	265.25	0.219221			197.079	1082.33	0.0951885			134.688	349.625	0.126534
			120.323	200.516	0.179183			269.375	1722.48	0.102257			128.125	298.062	0.126323
			121.581	430.419	0.0525682			120.768	218.115	0.152917			132.75	336.65	0.125197
			163.192	334.077	0.265624			115.892	185.705	0.154049			125.5	301.917	0.109674
			121.1	224.8	0.14663			113.214	163.874	0.168065			129.577	275.538	0.153091
			115.742	214.065	0.108434			113.966	164.925	0.179589			121.226	236.677	0.133353
			134.857	281.667	0.179142			113.062	160.95	0.175452			118.818	237.909	0.112425
			167	314.083	0.311428								116.286	207.81	0.121603
			149.769	391.423	0.161958								116.875	203	0.134943
			174.269	604.077	0.141632								120.531	203.281	0.175927
			176.812	546.938	0.166255								116	222.769	0.10207
			180	474.81	0.208443								170.731	409	0.223575
			156.529	471.471	0.144553								124.438	217.094	0.190393
			289.182	770.091	0.281155								144.619	275.095	0.247472
			241.429	609.714	0.275773								121.905	211.143	0.175832
			195.192	571.5	0.197573								129.808	264.385	0.166068
			214.905	632.381	0.212426								151.312	332.688	0.212745
			318.15	949.55	0.255407								154.627	385.373	0.18355
			184.952	576.381	0.173288								158.767	390.721	0.195005
			157.941	391.853	0.191224								127.829	288.557	0.131536
			167.731	428.808	0.199902								118.859	197.5	0.167988
			187.062	466.062	0.233754								139.333	243.412	0.267366
			150.143	464.381	0.129209								117.023	198.773	0.143519
			170.031	396.906	0.230683								116.432	186.973	0.158837
			202.812	540.5	0.229875								115.694	211.306	0.111042
			189.857	577.81	0.183352								116.75	180	0.180769
			479.905	1747.95	0.229587								118.627	181.588	0.204646
			168.625	387.312	0.233647								123	187.25	0.249135
			179.346	398.885	0.261888								114.523	222.545	0.088549
			225.9	603.5	0.247492								116.5	237	0.0942623
			254.793	810.259	0.215449								114.095	196.952	0.11098
			224.5	696.615	0.205462								116.388	221.775	0.106654
			160.619	363.381	0.223926								123.808	200.5	0.219977
			139.25	295.812	0.189423								123.469	188.188	0.25235
			132.308	257.308	0.191894								129.529	237.098	0.200896
			171.077	341.346	0.291929								120.882	218.176	0.153931
			202.714	515	0.244285								116.441	161.324	0.246978
			236.25	760	0.203488								121.703	173.703	0.284534
			249.5	696.808	0.248364								116.841	198.523	0.141769
													113.906	171.031	0.158948
													114.25	195	0.115625
													115.808	176.731	0.175082
													118.875	181.375	0.20904
													116.619	178.381	0.18332
													117.176	189.971	0.162409
													115.75	182	0.160448
													117.656	172.375	0.220584
													117.659	198.568	0.151481
													157.5	565	0.116667
													147.19	448.952	0.126336
													149.833	541.155	0.105204
													130.308	386.192	0.0933213
													120.562	351	0.0659407
													121.077	317.308	0.0794679
													127.143	260.429	0.15226
													123.688	201.875	0.215114
													128.625	266.938	0.155491
													146.577	358.423	0.170801
													118.048	227.524	0.115957
													123.333	214.333	0.184561
													150.75	446.375	0.138061
													175.688	548.062	0.163228
													155.8	434.3	0.159098
													129.735	422.471	0.0804466
													165.333	459.381	0.175193
													121.312	259.938	0.112545
													135.5	386.625	0.112287
													140.095	306.762	0.183013
													157.905	362.381	0.21386
													138.038	288.923	0.189958
													114	258.516	0.0627108
													115.781	288.375	0.0621831

## Sheet: exp2
lysosomes			0.0306801						0.117011						0.137357
WT untreated (11 cells)						KO untreated (22 cells)						KO+rescue untreated (8 cells)							background		YFP	CFP
	YFP	CFP	YFP/CFP				YFP	CFP	YFP/CFP				YFP	CFP	YFP/CFP						107	120
	136.269	2170.5	0.0142741				131.233	350.407	0.105175				148.188	738.688	0.0665731
	129.538	1204.31	0.0207856				166.295	462.79	0.172978				147.906	471.625	0.116334
	129.071	1827.14	0.0129286				213.973	923.134	0.133194				143.923	482.654	0.101813
	132.375	1763.38	0.0154408				238.525	1312.29	0.110313				157.857	624.667	0.100773
	131.812	1416.06	0.0191441				217.235	1219.33	0.100274				135.846	605.038	0.0594716
	124.375	1371.5	0.0138833				196.135	1469.58	0.0660466				130	420.375	0.076571
	124.5	718.062	0.0292612				356.667	1608.14	0.167771				136.279	507.547	0.0755495
	140.812	1535.06	0.0238944				330.794	1412.62	0.173132				128.176	350.647	0.0918113
	129.417	1098	0.0229213				335.1	1530.8	0.161681				125.615	338.154	0.0853296
	135.778	1463	0.0214281				146.645	481.323	0.109722				120.654	240.692	0.113131
	139.667	1738.08	0.0201887				200.777	4073.44	0.0237203				121.81	242.048	0.121346
	136.75	2137.12	0.0147487				244.641	3873.05	0.0366744				132.121	335.81	0.116403
	127.667	756.917	0.0324485				155.643	3089.55	0.0163806				132.25	290.375	0.148202
	125.167	1178.75	0.0171589				277.518	2836.7	0.0627665				137.312	308.875	0.160487
	123.143	1407.05	0.0125427				246.258	2832.26	0.0513439				143.952	341	0.167204
	124.833	2037.5	0.00930013				278.438	2643.23	0.0679438				138.238	300.619	0.17295
	126.636	1440.36	0.0148717				431.615	2886.19	0.117351				171.095	458.619	0.189284
	140	1373.69	0.0263223				371.606	2574.12	0.107821				163.281	457.125	0.166944
	136.833	1690.67	0.0189938				323.854	3953.48	0.0565684				150.048	409.095	0.148906
	136.423	1259.04	0.0258314				301.495	2269.95	0.0904648				128.952	329.286	0.10489
	147	1391.5	0.0314589				371.57	3026.28	0.0910337				148.423	320.269	0.206837
	143.75	1537.38	0.0259282				208.644	1988.46	0.0543999				118.35	260.9	0.0805536
	152.952	1036.76	0.0501242				226	2217.54	0.056733				117.062	255.062	0.0744991
	150.125	1241.25	0.0384615				343.818	3753.2	0.0651817				119.19	223.571	0.117697
	144.562	1108.06	0.0380158				409.242	3825.46	0.0815666				127.622	354.811	0.0878238
	177.583	1293.75	0.0601346				275.252	3640.61	0.0477906				125.905	433.714	0.0602619
	150.583	890.5	0.0565646				343.693	1435.23	0.179963				130.538	407.346	0.0819152
	151.875	1408.25	0.0348341				123.667	323.146	0.0820444				120.25	307.25	0.070761
	127.833	1435.08	0.0158416				162.575	691.089	0.0973141				133	447.333	0.0794298
	126.111	1205.89	0.0175994				165.909	702.386	0.101151				141.188	411.688	0.117207
	132.524	1099.62	0.026055				181.853	608.5	0.15323				152.25	474	0.127825
	139.75	1967.75	0.0177243				152.588	631.147	0.0891877				134.25	368.417	0.109695
	146.5	1698.12	0.0250297				166.769	588.164	0.127667				137.882	507.676	0.0796593
	135.381	793.619	0.0421321				152.986	523.48	0.113973				162.361	551.222	0.128382
	134.923	1241.69	0.0248936				152.167	615.028	0.0912413				132.5	304.583	0.138149
	141.375	1220	0.03125				142.519	519.658	0.0888735				125.094	266.125	0.123825
	123.917	1159.92	0.0162676				162.983	682.138	0.0995894				127.429	279.619	0.127986
	121.727	1057.45	0.0157096				153.647	578.529	0.101732				126.068	307.091	0.101918
	121.625	880.625	0.0192276				259.348	1296.05	0.129542				124.469	320.531	0.0871137
	130.917	1342.67	0.0195613				220.768	1628.06	0.0754402				120.714	269.333	0.091835
	123.882	1542	0.011872				270.526	1573.58	0.112499				118.312	244	0.0912258
	119.333	1315.83	0.0103133				484.221	2176.45	0.183433				141.688	355.062	0.14757
	116.375	691.875	0.0163934				118.028	310.229	0.0579722				369.588	947.059	0.317496
	121.625	566.75	0.0327364				126.33	351.634	0.0834506				230.423	563.769	0.278124
	115.812	931.938	0.010853				396.336	2711.95	0.111629				136.417	371.917	0.116773
	119.333	1067.67	0.0130141				537.656	2874.56	0.156343				137.778	311.667	0.160581
	115.75	761.25	0.0136452				634.631	4094.6	0.132751				140.031	357.344	0.139169
	113.667	827.667	0.0094211				530.242	3395.97	0.129196				130.417	277.25	0.148916
	119.25	623.312	0.0243388				147.484	388.609	0.150717				133.875	289.688	0.158379
	114	499.75	0.0184332				138.198	461.344	0.0913975				125.281	293.719	0.105233
	122.083	667.167	0.0275656				136	405.384	0.101617				122.6	260.6	0.110953
	116.25	772.25	0.0141817				140.941	483.941	0.0932596				121.5	274.938	0.0935858
	117	1083.75	0.0103761				160.971	511.75	0.137769				123.333	242.095	0.133773
	114.545	1181.64	0.00710696				164.477	614.591	0.116211				119.941	212.912	0.139282
	114.75	1095	0.00794872				168.346	425.654	0.200704				123.919	230.027	0.153771
	128.5	1849.31	0.0124327				154.802	647.826	0.0905639				141.725	277.706	0.220188
	123.159	2075.8	0.00826211				145.256	479.052	0.106547				137.088	505.235	0.078103
	126.731	1559.42	0.0137076				137.096	440.422	0.0939261				113.381	286.048	0.0384286
	122.048	1293.9	0.0128188				161.346	605.769	0.111876				115.875	244.562	0.0712497
	124.583	1461.83	0.0131037				144.808	386.923	0.141644				118.778	207.333	0.134863
	127.231	1304.23	0.0170837				199.007	722.228	0.152778				118.75	183.125	0.186139
	128.312	1814.06	0.0125804				246.132	851.265	0.190262				122.375	258.5	0.111011
	126.429	1733.57	0.012041				278.598	3007.56	0.0594266				122.667	222.333	0.153098
	132.125	1435.06	0.0191056				198.059	704.529	0.155782				120.833	251.417	0.10526
	119.625	1489.41	0.00921933				187.235	567.265	0.17939				124	224.5	0.162679
	122.75	1087.44	0.0162801				284.583	961.917	0.210927				124.833	223.917	0.171608
	156.182	1835	0.0286776				288.308	1112.46	0.182685				123.556	217.333	0.170096
	135	1372.94	0.0223475				647.614	3235.48	0.173525				112.125	179.938	0.085505
	137.167	1180.08	0.0284572				669.385	3093.9	0.189107				111.833	179	0.0819153
	153.667	853.714	0.0636038				664.202	2862.36	0.203184				122	189.25	0.216606
	135.692	1525.15	0.0204191				629.375	2772.72	0.196921				119.062	186.75	0.180704
	131.269	1625.42	0.0161211				601	2848.09	0.181079				119.222	190.444	0.1735
	145.286	1604.43	0.0257917				524.312	1972.75	0.225239				117.375	177.5	0.180435
	147.459	2478.86	0.0171519				298.406	1192.03	0.178546				114.312	172.562	0.139112
	160.385	1574.23	0.0367101				298.906	1215.53	0.175172				119.583	189.333	0.181486
	170.962	1656.08	0.0416398				242.922	1866.01	0.0778471				122	268.333	0.101124
	135.038	1679.04	0.0179842				271.288	1794.69	0.0981005				123.583	229.833	0.150984
	145.577	2010.19	0.020409				281.029	2059.7	0.0897195				127.625	235	0.179348
	129.281	1801.5	0.0132507				226.658	1820.29	0.0703753				126.75	213.812	0.210527
	131.25	1109.42	0.0245094				227.401	2197.06	0.0579671				126.619	229.095	0.179834
	189.81	1257.95	0.0727711				267.014	1635.22	0.105605				126.857	253.952	0.14824
	130.583	1230.17	0.0212427				354.865	2014.37	0.130843				126.833	256.25	0.145563
	130.25	923.875	0.0289224				255.249	1802.25	0.0881252				130.25	276.75	0.148325
	128.889	1565	0.0151481				286.753	1558.75	0.124937				127.667	292.25	0.119983
	130.75	1095.17	0.0243548				342.739	1564.25	0.163226				126.667	296	0.111744
	132.778	1201.78	0.0238293				168.181	1928.59	0.0338281				127.5	336.083	0.094871
	151.65	2315.4	0.020338				216.833	2335.07	0.0495845				130	309.25	0.121532
	145.619	1439.62	0.0292653				231.186	2250.28	0.0582957				131.81	298.762	0.138788
	138.429	1111.9	0.0316855				238.683	1314.69	0.110224				133	279.75	0.162754
	143.615	1159.04	0.0352393				247.99	1679.6	0.0904016				133.375	310.562	0.138406
	125.375	837.375	0.0256142				174.794	1011.67	0.0760305				129.062	266.5	0.150594
	119	1045.94	0.0129598				185.824	941.101	0.0959979				132.75	250.5	0.197318
	120.636	1241.82	0.0121553				177.62	672.423	0.127837				132.476	339.571	0.116026
	121.091	1389.91	0.0110961				401.543	1794.1	0.175941				134.857	322.524	0.137549
	119.714	830.286	0.0178998				482.719	2177.84	0.182579				137.952	320.238	0.154576
	117.625	1023.75	0.0117566				647.811	3248.54	0.172864				146	363.571	0.160118
	145.9	2096.35	0.0196827				165.312	620.062	0.11661				147.625	340.375	0.184345
	136.688	1570.81	0.020463				202.963	679.812	0.17142				147	387.375	0.149603
	133.853	2557.71	0.0110157				193.146	755.542	0.135547				148.048	455.714	0.122271
	140.938	1226.62	0.030668				179.638	967.13	0.085746				144.524	506.571	0.0970688
	127.571	1101.67	0.0209552				176.032	467.581	0.198607				155	400.833	0.17092
	126.333	1425.19	0.0148124				147.333	393.714	0.147355				171.812	480.312	0.179877
	142.048	1911.95	0.0195586				159.5	485.706	0.143558				130.667	356.167	0.100213
	129.75	623.125	0.0452174				237.882	997.735	0.149113				126.917	334.333	0.0929255
	128.75	1185	0.0204225				324.378	1327.32	0.180049				128.75	299.562	0.121128
	123.812	809.625	0.0243785				376.857	1158.29	0.259906				127	287.5	0.119403
	120.438	757.188	0.0210895				141.379	963.25	0.0407696				129.188	274.125	0.143961
	125.65	826.3	0.0264052				191.583	1132.03	0.0835777				127.312	317.812	0.102683
	125.938	755.312	0.029809				147.782	935.508	0.0500081				130.095	369.286	0.0926446
	140.25	462.4	0.0971086				150.147	873.982	0.0572255				124.476	290.857	0.102284
	140	597.333	0.0691341				190.381	927.381	0.103273				131.125	372.875	0.0954029
	139.846	562.192	0.07428				220.875	995	0.130143				139.875	327.688	0.15829
	128.286	743.857	0.03412				177.112	544.704	0.165084				141.625	356.125	0.146638
	131.75	646.667	0.0469936				167.971	1425.07	0.0467185				130.571	322.429	0.116441
	130.846	636.692	0.0461513				178.646	1028.93	0.0788242				148.444	314.222	0.213385
	126.55	622	0.0389442				531.861	2760.81	0.160883				149.875	436.25	0.135573
	127.333	792.833	0.03022				286.625	1614.71	0.120174				147.667	417.81	0.136554
	124.571	560.381	0.0398995				132.885	367.409	0.104624				133.5	245.625	0.210945
	128.438	790	0.031997				129.608	349.952	0.0983162				130.833	212.417	0.257885
	127.75	533.833	0.050141										216.941	382.176	0.41934
	134.417	1273.08	0.0237771										139.25	501.75	0.0844794
	135.364	1291.91	0.0242032										143.5	534.75	0.0880048
	129.688	1134.75	0.0223582										185.545	407	0.273676
	134.286	1122.05	0.0272302										146.115	394.577	0.142455
	133.238	1120.24	0.0262318										137.909	435	0.0981238
	149.6	1252.85	0.0376043										135.636	392.273	0.105174
	127.667	654.083	0.0386962										140.636	426.909	0.109596
	137.839	2595.97	0.0124553										128.818	282.636	0.134152
	132.857	2330.19	0.011699										149	424.55	0.137908
	131.81	1812.05	0.0146627										143.875	425	0.120902
	131.05	1253.25	0.0212221										134.625	301.75	0.151994
	138.048	985.571	0.03587										165.125	468.25	0.166906
	139.308	907.154	0.0410441										176.5	460.917	0.203862
	126.625	1207.69	0.0180429										158.375	407.625	0.178618
	134.75	977.667	0.0323552										132.889	294.556	0.148313
	138.25	1193.38	0.0291138										139.875	391	0.12131
	138.312	944.125	0.0379942										140.583	377.833	0.130251
	131.818	837.364	0.0345961										133.875	328.625	0.12882
	132.375	899.188	0.032566										144.167	439.917	0.116177
	132.125	1321.84	0.0209054										164	532.917	0.138042
	134	1152.94	0.026139										124.5	322.562	0.0863933
	134.308	981.154	0.0317109										132.444	256	0.187088
	136.571	972.905	0.0346709										162.625	495.125	0.148284
	135.875	1645.25	0.0189313										139.625	340.875	0.147708
	130.333	1273.5	0.020228										145.75	381.938	0.147936
	124.159	1223.16	0.0155544										140.333	367.917	0.134452
	136.238	1604.67	0.0196933										137.25	287.812	0.180261
	132.083	1524.33	0.0178611										142.583	342	0.160284
	132.692	1270.12	0.0223386										124.556	248.333	0.1368
	126.323	1045.19	0.0208853										137.75	334.375	0.14344
	147.688	1399.5	0.0317999
	126.571	893.333	0.0253073
	139.577	1121.73	0.0325207
	132.562	1954.06	0.0139374
	122.812	1182	0.0148889
	127.385	1161.5	0.0195727
	121.333	868.417	0.0191511
	126.125	1140.19	0.0187465
	128.667	1058.75	0.0230807
	124.375	1009.38	0.0195362
	118.857	1038.95	0.0129027
	117.909	1250.55	0.00964933
	117.5	974.562	0.012287
	122.583	660.25	0.0288441
	117.75	735.625	0.0174619
	117.333	969.048	0.0121701
	116.083	832.333	0.0127511
	134.188	1360.34	0.0219197
	136.857	1804.38	0.0177258
	121.462	2042.04	0.0075243
	133	1477.75	0.0191493
	131	2022.12	0.0126175
	136.857	974.143	0.0349555
	138.429	1686.71	0.0200605
	134.824	2063.26	0.0143182
	138.615	1148.73	0.030732
	122.556	856.444	0.0211231
	141.714	1319.33	0.0289444
	133.364	979.818	0.0306623
	163.909	1373.45	0.0454017
	182.559	1349.38	0.061461
	266.476	2723.95	0.0612438
	191.75	1923.62	0.0469887
	260.25	2315.06	0.0698158
	256.857	3324.57	0.0467635
	249.1	2800.05	0.0530214
	245.833	1756.58	0.084831
	331.688	2556.69	0.0922104
	380.375	3046	0.0934296
	257.727	2034.91	0.0787124
	253.375	2195.38	0.0705294
	231.667	1287.33	0.106796
	145.176	1603.47	0.0257342
	184.938	2992	0.0271372
	297.65	1577.1	0.130842
	175.25	944.583	0.0827691
	271.714	1816.9	0.0970673
	232.167	1498.83	0.0907775
	305.417	1951.08	0.10836
	287.952	1927.43	0.100116
	269.381	1808	0.0961973
	175.538	1961.81	0.0372123
	263.7	1563.3	0.108571
	181.5	1247.5	0.0660754
	180.167	1482.42	0.0537038
	156.167	1116.25	0.0493521
	144.5	1288.81	0.0320839
	126.625	941.625	0.0238856
	126.381	996.286	0.0221172
	129	742	0.0353698
	124.625	889.5	0.0229045
	137.583	1349.08	0.0248828

## Sheet: exp3
lysosomes				0.0613204				0.0820534				0.0959698
		WT (9 cells)				KO (15 cells)				KO+rescue (10 cells)
		YFP	CFP			YFP	CFP			YFP	CFP				background
		179.167	2084	0.0376865		167.838	3031.42	0.0215536		116.423	354.423	0.0479106
		205	2178.38	0.0484876		163.835	2273.64	0.0272682		119.125	384	0.0527052			YFP	CFP
		200.667	3097.5	0.0320869		167.853	2635.84	0.0249432		123.469	836.656	0.025628			105	116
		215	1802.69	0.0652166		163.848	1982.95	0.031521		124.75	797.75	0.0289696
		245.938	2421.81	0.0611229		172.903	2392.73	0.0298248		127.667	704.714	0.0385026
		281.188	2317.44	0.0800331		156.167	1848.78	0.0295289		128.095	818.333	0.0328833
		333.769	2886.39	0.0825766		172.647	2117.4	0.0337998		122.095	773.905	0.025984
		278.038	2839.89	0.0635262		217.974	3653.49	0.0319362		138	1508.44	0.0236994
		195.5	2340.83	0.0406772		247.75	3002.09	0.0494614		139.375	1229.75	0.0308642
		224.625	2669.5	0.0468475		319.942	3356.62	0.0663273		140.857	1076.86	0.0373177
		220.75	1748.38	0.070909		413	4003.76	0.0792231		140.618	1322.23	0.0295282
		180.125	3234.06	0.0240935		512.814	3042.3	0.139362		150.562	1226.19	0.0410399
		209.25	2412	0.0454051		579.333	3861.35	0.126646		141.054	1638.49	0.023681
		154.083	1566.92	0.033829		367.203	3919.8	0.0689319		147.138	1636.67	0.0277101
		169.75	2100.88	0.0326217		764.63	3744.68	0.181782		129.577	1274.38	0.0212166
		166.484	2215.48	0.0292853		288.488	1849.49	0.105849		136.562	1343.25	0.0257177
		198.375	1498.56	0.0675377		217.87	1831.3	0.0658019		132.688	971.969	0.032347
		145.8	1904.95	0.0228067		213.045	1761.9	0.0656449		137.938	1756.38	0.0200796
		145.913	1133.49	0.0402096		227.422	3077.42	0.0413389		138.476	1903.52	0.0187276
		200.987	1288.63	0.081856		134.705	571.705	0.0651847		139.714	1527.48	0.0245941
		278.75	1684.88	0.110748		136.832	454.956	0.0939119		147.038	1379.5	0.0332711
		154.192	977.365	0.0571094		126.76	341.431	0.0965262		158.808	1350.15	0.0435991
		170.05	2345.35	0.0291789		123.191	372.669	0.0708734		151.562	1201.31	0.0429019
		204.55	2052.25	0.0514138		141.345	557.643	0.082295		151.286	1196.38	0.0428423
		205.455	2149.64	0.0493967		138.833	601	0.0697588		148.833	1194.5	0.0406426
		169.443	1310.2	0.0539633		145.865	516.135	0.102128		149.5	1037.69	0.0482808
		215.062	2193.69	0.0529733		136.788	565.231	0.0707609		155.583	921.917	0.0627645
		213.903	2068.61	0.055773		132.883	369.45	0.110014		162.562	896.062	0.0737916
		194.625	2453.38	0.0383443		124.54	351.526	0.0829632		168.905	1139.05	0.0624653
		235.708	2514.88	0.0544872		131.277	453.625	0.077829		162.512	1544.76	0.040253
		210.906	1629.62	0.0699685		141.938	475.534	0.102739		144.531	1628.12	0.0261427
		175.5	2219.06	0.0335225		128.543	322.229	0.11416		227.977	2579.84	0.0499127
		209.625	2116.12	0.0523092		121.017	467.586	0.0455564		259.038	2765.15	0.0581461
		185.143	1766.67	0.0485519		147.048	365.714	0.168385		211.038	2641	0.0419952
		288.729	1430.77	0.139742		134.493	427.993	0.094531		212.216	2189.38	0.0517108
		226.807	906.733	0.154043		130.948	440.983	0.0798442		257.095	2800.38	0.0566592
		293.955	1117.16	0.188736		131.922	373.255	0.104651		441.286	2494.71	0.141373
		246.381	1742.05	0.0869476		186.929	831.652	0.114482		392.269	2404.5	0.125527
		265.471	1547.59	0.112093		178.194	939.111	0.0889236		202.143	1616.9	0.064723
		243.031	1641.72	0.0904695		118.933	362.327	0.056563		162.25	1470.75	0.0422587
		161.375	1198.34	0.052086		128.247	475.474	0.0646695		141.5	946.65	0.0439415
		170.29	1520.32	0.0464923		121.486	438.3	0.0511511		141.346	825.962	0.0511943
		169.167	2021.83	0.0336687		116.39	390.088	0.041556		142.077	821.731	0.052537
		202.929	2674.79	0.0382717		117.308	325.423	0.058771		166.294	880.176	0.0802093
		165.688	1304.38	0.0510681		127.627	417.533	0.0750399		199.935	1425.87	0.0724766
		199.962	1601.58	0.0639226		124.529	446.086	0.0591634		180.308	1146.12	0.0731064
		186.824	1721.65	0.0509601		135.35	583.65	0.064899		155.875	1832.62	0.0296366
		177.5	963.594	0.0855362		126.785	465.012	0.0624191		160.094	1680.59	0.035213
		166.083	1398.81	0.0476167		118.719	342.094	0.0606783		146.292	1012.5	0.0460591
		191.556	1338.28	0.0708153		121.059	256.647	0.114179		156.688	908.812	0.0651958
		248	3081.94	0.0482141		116.925	377.675	0.0455718		194.098	1411.78	0.0687599
		233.973	2709.49	0.0497296		145.583	538.31	0.0960977		280.962	1933	0.096842
		259.083	2744.5	0.0586201		157.125	1243.05	0.0462492		152.147	899.029	0.0602111
		258	3276.5	0.0484101		131.523	467.273	0.0755054		169.286	1345.05	0.0523055
		383.917	3253.67	0.0888931		236.745	1589.33	0.08942		184.846	1346.88	0.0648688
		291.875	3726.94	0.0517525		235.995	1308.12	0.109884		250.577	1112.04	0.146156
		337.583	2684.75	0.0905433		158.167	959.769	0.0630113		339.696	2340.36	0.105512
		321.062	2595	0.0871569		158.124	1227.45	0.0477971		188.538	1121.46	0.0830842
		317.524	2839.71	0.0780273		143.73	1760.08	0.0235572		119.762	318.667	0.0728387
		255.5	2274.88	0.0697122		131.308	555.654	0.059838		135.054	568.108	0.0664753
		174.5	2435.19	0.0299674		130.373	1133.49	0.0249369		119.438	311.312	0.0739227
		166.25	1907.25	0.034194		223.929	1700.72	0.0750472		130.968	393.968	0.0934208
		139.75	1340.25	0.0283847		193.974	1254.16	0.0781737		121.068	347.864	0.0692992
		140	1432.67	0.0265823		231.9	1393.93	0.099301		134.923	490.615	0.0798767
		146.688	1367.81	0.0333021		225.484	1296.84	0.102033		136.294	525.529	0.0764146
		213.833	1735.33	0.0672085		223.856	1142.6	0.115777		148.219	630.094	0.0840683
		127.25	1847.58	0.0128495		175.85	1244.06	0.0628068		154.667	667.476	0.0900619
		131.095	1660.95	0.0168905		200.38	1140.86	0.0930663		127.885	369.077	0.090427
		122.25	1415.25	0.0132769		250.595	1558.73	0.100916		161	925.188	0.0692052
		119	1821.75	0.00820753		171.395	1189.98	0.0618216		123.781	460	0.0545959
		157.833	1720.67	0.0329246		173.986	1303.04	0.0581158		141.875	428.25	0.118094
		277.857	2200.76	0.0829145		169.268	1321.62	0.0533068		141.875	465.062	0.10564
		265.5	2900.75	0.0576353		139.3	671.15	0.0617851		152.161	653.194	0.0877914
		279.5	2178.69	0.0845983		137.686	886.914	0.042399		152.192	823.885	0.0666662
		260.688	2307.5	0.0710418		184.354	881	0.103731		204.333	1262.33	0.0866528
		298.524	2336.81	0.0871412		187.031	2046.59	0.0424902		165.286	898.667	0.0770264
		284.062	2146.44	0.0881889		321.712	1926.86	0.119673		166.095	832.714	0.0852432
		170.667	3078.19	0.0221684		281.644	1418.35	0.135635		188.781	1144	0.081499
		167.188	2491.62	0.0261775		413.337	1848.59	0.177963		228.45	1418.6	0.094772
		182.048	2789.38	0.0288204		203.716	1198.87	0.0911613		153.077	656.154	0.0890061
		325.281	2758.44	0.0833628		273.116	1742.66	0.10335		140.81	551.667	0.0821958
		627.286	3275.05	0.16533		306.058	1351.57	0.162725		133.385	367.5	0.112863
		336.903	2324.68	0.104996		228.41	1385.85	0.0971848		131.038	342.808	0.114802
		258.667	2197.25	0.073834		347.151	1580.87	0.165305		122.857	242.714	0.140924
		197.438	2462.75	0.0393898		189.735	965.218	0.09978		121.156	251.5	0.119232
		212.25	2097.69	0.0541205		314.58	1363.37	0.168018		127.765	333.971	0.10444
		259.25	1885.88	0.087153		227.163	1039.96	0.132216		119.762	318.667	0.0728387
		202.375	2116.44	0.0486768		121.53	291.036	0.0944377		135.054	568.108	0.0664753
		298.667	2341.33	0.0870283		144.729	559.146	0.0896522		119.438	311.312	0.0739227
		306.688	2226.22	0.0955768		118.98	289.78	0.0804465		130.968	393.968	0.0934208
		292.5	2881.5	0.0677997		126.915	359.644	0.0899468		121.068	347.864	0.0692992
		300.962	1639.27	0.128646		145.198	479.903	0.110464		134.923	490.615	0.0798767
		244.381	2350.91	0.0623655		137.661	383.763	0.121977		136.294	525.529	0.0764146
		271	2790.25	0.0620735		187.805	493.668	0.219253		148.219	630.094	0.0840683
		279.857	2001.05	0.09276		180.415	535.293	0.179862		154.667	667.476	0.0900619
		184.292	1569.17	0.054565		149.596	598.39	0.092448		127.885	369.077	0.090427
		204.562	1331	0.081944		142.071	3382.12	0.0113502		161	925.188	0.0692052
		202.7	1793.35	0.0582466		142.417	3539.8	0.0109285		123.781	460	0.0545959
		174.25	1412.42	0.0534165		170.157	1440.71	0.049186		141.875	428.25	0.118094
		161.062	1693.88	0.0355301		154.235	2036.09	0.0256421		141.875	465.062	0.10564
		137.476	1648.81	0.0211872		150.125	2280.13	0.0208513		152.161	653.194	0.0877914
		203.538	1747.96	0.0603801		158.45	627.867	0.104422		152.192	823.885	0.0666662
		137.438	1372.5	0.0258162		206.135	1337.73	0.0827802		204.333	1262.33	0.0866528
		214.062	1058.12	0.115762		348.452	2210.34	0.116243		165.286	898.667	0.0770264
		178.889	1449.11	0.055426		411.979	2922.61	0.109377		166.095	832.714	0.0852432
		149.811	1488.13	0.0326579		461.558	1551.74	0.248344		188.781	1144	0.081499
		171.406	2172.75	0.0322869		650.734	3929.95	0.143089		228.45	1418.6	0.094772
		162.476	1633.9	0.0378653		729.769	3649.81	0.176798		153.077	656.154	0.0890061
		152.333	1186.14	0.0442305		412.488	1970.21	0.165832		140.81	551.667	0.0821958
		161.15	1549.25	0.0391767		336.654	2369.77	0.102785		133.385	367.5	0.112863
		150.692	2093.61	0.0231046		235.71	2511.23	0.0545711		131.038	342.808	0.114802
		172.615	1385.12	0.0532773		240.032	2153.36	0.0662781		122.857	242.714	0.140924
		149.806	1943.68	0.0245153		310.288	2596.8	0.0827507		121.156	251.5	0.119232
		154.484	1805.64	0.0292866		529.344	3100.97	0.14216		127.765	333.971	0.10444
		144.625	2030.75	0.0206946		461.462	2376.64	0.157682		118.923	645	0.0263195
		158.762	1359.48	0.0432353		865.619	2952.93	0.268114		119.031	418.688	0.0463547
		150	1550.94	0.0313602		443.596	2288.22	0.155875		121.649	322.649	0.0805666
		152.962	1576.92	0.0328299		643.477	2826.77	0.198644		118.188	445.531	0.0400205
		139.577	1542.12	0.0242456		598.785	1937.39	0.271103		120.062	381.062	0.0568244
		285.05	2593.05	0.0726873		286.699	2506.35	0.0760137		118.438	269.75	0.0874016
		316.688	2606.12	0.085011		235.229	1361.61	0.104551		118.19	467.143	0.037563
		197.5	1996.58	0.0491869		236.295	2027.8	0.0686763		118.048	464.81	0.0374072
		197.688	1809.81	0.0547215		265.343	1166.59	0.152622		119.125	335.938	0.0642226
		208.048	2014.81	0.0542698		169.69	2606.26	0.0259772		122.5	336.875	0.0792303
		158.208	1659.17	0.0344797		164.652	1623.23	0.0395772		123.143	488.619	0.0486905
		172.875	1847.06	0.03921		373.99	2118.75	0.13431		117.095	328.476	0.0569241
		172.238	1445.24	0.0505839		141.034	1599.6	0.0242882		122.062	316.062	0.0852836
		160.9	1682.8	0.0356778		135.148	889.984	0.0389517		128.619	333.524	0.108581
		140.571	1851.1	0.0205009		148.097	1704.28	0.0271344		127.625	302.375	0.121395
		179.583	1217.83	0.0676899		144.839	1680.85	0.0254587		132.688	415.25	0.0925246
		138.5	1747.42	0.0205343		150.783	1817.49	0.0269076		148.194	481.484	0.118183
		150.692	1891.15	0.0257397		153.351	1350.57	0.0391643		154.346	449.154	0.148118
		159.619	1554.05	0.0379813		153.97	1703.28	0.0308516		137.2	331.55	0.149385
		125	2008.5	0.010568		158.465	2291.92	0.0245712		138.156	460.438	0.0962612
		175.19	2603.62	0.0282157		160.693	2244.2	0.0261691		129.324	621.059	0.0481607
		190.25	2669.45	0.0333862		194.654	2439.8	0.0385808		130.333	780.143	0.0381439
		175.375	1872.91	0.0400562		162.988	2211.2	0.0276766		126.667	760.083	0.0336401
		186.083	1787.92	0.048497		202.285	3320.26	0.0303611		138	808.45	0.0476569
		164.143	1737.48	0.0364748		179.173	2495.92	0.0311661		134.05	629.55	0.056567
		161.81	2351.38	0.025414		166.388	2622.16	0.0244949		143.188	832	0.0533352
		173.476	1854.52	0.0393874		152.51	1789.71	0.028386		166.419	774.258	0.0933054
		207.562	2012	0.0540939		151	2197.02	0.0221045		154.677	659.129	0.0914645
		177.917	1548.75	0.050893		159.15	2399.03	0.0237185		185.75	817.477	0.115114
		207.333	3154.33	0.0336806		155.089	1972.01	0.0269875		178	1000.43	0.0825391
		193.7	2443.65	0.0381071		149.058	1307.46	0.036978		174.423	840.885	0.0957711
		189.9	2497.25	0.0356535		179.427	2140.05	0.0367714		170.75	718.25	0.109174
		179.583	1695.08	0.0472318		145.464	3217.03	0.0130486		162.8	671.95	0.103966
		178.286	2092.81	0.0370729		887.653	3661.27	0.22076		173.05	805.6	0.0986804
		172.962	1877.27	0.038587		300	2225.1	0.0924565		149	594.656	0.0919241
		158.083	2081.42	0.0270085		403.2	2360.54	0.132856		154.038	627.269	0.0959143
		213.538	3226.27	0.0348967		587.644	3010.97	0.166718		186.654	432.769	0.257771
		148.286	2042	0.0224746		521.026	3269.25	0.131936		168.853	381.382	0.240608
		157	1345	0.0423108		134.699	1831.96	0.0173075		160.531	676.031	0.099157
		140.5	1400.75	0.0276318		133.845	1269.44	0.0250077		188.097	943.452	0.100425
		144.167	1400	0.0305039		134.161	1623.83	0.0193397		188.635	461.115	0.24234
		154.375	1247.31	0.043644		174.313	1504.5	0.0499192		332.133	808.133	0.328164
		143.812	1824.81	0.0227129		160.508	1983.24	0.0297273		183.382	710.735	0.131793
		146.125	2054.81	0.0212114		169.892	2750.03	0.024636		187.524	698.143	0.141759
		149.812	2854.5	0.0163637		148.968	2954.9	0.0154877		181.19	502.952	0.196898
		181.812	1643.25	0.0502943		201.423	961.029	0.114106		168.969	494.156	0.16916
		137	964.581	0.03771		323.682	964.614	0.257693		170.938	482.562	0.179882
		151.75	984.65	0.0538191		770.571	3174.07	0.217644		163.265	879.235	0.0763395
		129.529	809.941	0.0353474		227.107	2924.55	0.0434769		166.571	675.238	0.110098
		136.85	731.6	0.0517381		234.124	2775.84	0.0485459		146.923	386.731	0.154851
		136.692	614.808	0.0635355		385.179	1708.08	0.175983		154.762	382.333	0.186841
		149.312	923.625	0.054867		270.395	1727.02	0.102665		176.571	552.619	0.163921
		167.688	831.062	0.0876679		373.295	1638.27	0.176246		164.222	407.472	0.203182
		160.6	868.65	0.0738723		134.51	1232.23	0.0264371		155.139	612.028	0.101081
		133.429	1114.71	0.0284656		130.731	945.718	0.0310117		146	493.615	0.108576
		132.083	1027.33	0.029718		172.333	647.6	0.126661		147.324	600.147	0.0874197
		137.667	851.857	0.0443931		166.945	753.269	0.0972038		157.882	502.5	0.136823
		129.25	680.7	0.0429432		207.693	891.153	0.132481		153.923	675.654	0.0874165
		131.25	702.438	0.0447618		157.412	579.464	0.113088		156.735	905.294	0.0655459
		135.333	661.417	0.0556143		219.614	711.636	0.192423		170.156	852.812	0.0884296
		144.312	574.062	0.0858224		124.043	383.304	0.071241		142.923	781.846	0.0569546
		157.038	1238.81	0.0463463		137.527	2677.91	0.0126964		162.7	769.35	0.0883141
		135.692	1119.12	0.0305967		134.74	2222.19	0.0141203		155.048	1210	0.0457477
		127.857	763	0.0353277		131.058	1672.87	0.0167374		164.5	1427.81	0.0453571
		134.438	860.062	0.0395639		145.295	1949.24	0.0219801		182.769	1004.96	0.0874829
		138.583	1044.75	0.0361594		136.181	2432.47	0.0134606		209.577	1380.38	0.0827098
		259.35	1231	0.13843		140.532	2367.64	0.0157805		189.731	1430.46	0.0644606
		281.857	1246.14	0.156491		144.252	2553.06	0.0161063		180.654	1317.65	0.0629582
		146.667	1365.24	0.0333539		132.842	1279.34	0.0239328		181.118	1283.5	0.0651974
		144.75	1213.58	0.0362159		126.691	2249.94	0.0101648		513.054	1723.62	0.253825
		139.562	1267.44	0.0300164						600.406	1597.69	0.334352
		133.111	1241.44	0.0249777						195.188	1242.81	0.0800382
		137.19	1400.24	0.0250654						135.688	1014.56	0.0341523
		135.833	984.75	0.0354912						132.15	878.25	0.0356182
		137.917	722.25	0.0542961						131.25	842.062	0.0361539
		122	710.538	0.0285936						143.048	909.81	0.0479309
		134.688	1133.44	0.0291792						142.619	874.333	0.0496075
		132.667	867.25	0.036828						138.115	885.115	0.043056
		128.889	520.111	0.0591149						238.429	1368.62	0.10652
		127.188	713.688	0.037123						156.731	844.308	0.071029
		137.19	742.714	0.0513631						130.346	706.923	0.0428922
		127.4	587	0.0475584						136.917	608.833	0.0647623
		128.625	609.75	0.0478481						148.231	830.423	0.0605118
		129.167	589.333	0.0510571						128	412.812	0.0774901
		141.85	826.5	0.0518649						170.865	948.595	0.0791081
		120.545	813.182	0.0222969						271.903	1421.74	0.127822
		222.231	1476	0.0861993						132.938	669.812	0.0504467
		183.19	838.19	0.108268						130.9	629.8	0.0504087
		187.694	1573.31	0.0567444						134	423.935	0.0941757
		178.615	994.192	0.0838256						154.938	898.938	0.0637828
		154.568	791	0.0734341						138.654	641.885	0.063995
		155.818	865.273	0.0678231						128.143	417.095	0.0768628
		150.167	604.667	0.092429						120.65	629.8	0.0304593
		235.188	1178.94	0.122479						120.438	397.812	0.0547812
		172.762	1026.19	0.0744482						124.286	425.143	0.0623854
		244.25	1543.9	0.0975208						120.364	431.727	0.0486623
		202.75	1409.42	0.075575						117.364	393.818	0.044504
		161.375	831.5	0.0787911						120	411.125	0.0508259
		178.286	954.381	0.0874137						126.962	897.115	0.0281162
		147.375	778.594	0.0639532						132.562	537.875	0.0653321
		156.143	1005.33	0.0575071						126.714	516.571	0.0542076
		152.269	783.692	0.0707946						126.238	476.048	0.0589866
		253.346	988.885	0.169949						139.923	519.115	0.0866328
		464.188	1571.5	0.24678						120.795	766.5	0.0242813
		151.941	670.735	0.0846188						126.808	623.885	0.0429389
		179.031	981.844	0.0855015						123.077	439.462	0.055886
		152.824	1159.29	0.0458394						121.75	514.188	0.0420656
		151.5	1245.62	0.0411645						126.875	448.969	0.0656968
		157.077	977.346	0.06046						120.55	783.15	0.0233081
		161	866.231	0.0746437						118.812	647.125	0.0260052
		149.562	992.375	0.0508481						122	332.731	0.0784382
		140.462	772.5	0.0540168						119.346	1099.58	0.0145855
		136.538	773.038	0.0480003						173.125	687	0.119308
		153.676	1024.56	0.0535749						139.206	531.882	0.0822493
		161.619	843.619	0.0778141						124.692	560.577	0.0442938
		151	749.25	0.0726411						121.75	566.5	0.0371809
		205.75	814.125	0.144315						141.19	890.143	0.0467485
		227.238	1020.71	0.135112						119.162	1104	0.014334
		157.5	772.417	0.0799796						123.125	1215.06	0.0164913
		256.269	1110.35	0.152129						127.273	1402.82	0.0173086
		142.438	646.812	0.0705297						120.688	833.125	0.0218762
		134.346	789.731	0.0435574						139.19	1319.38	0.0284116
		139.048	648.905	0.0638913						155.714	1694.33	0.0321314
		134.619	517.571	0.0737578						158.75	1463.2	0.0398976
		134.429	574.905	0.0641287						151.833	1313.42	0.0391117
		136.833	429.75	0.10146						132.19	1099.43	0.0276482
		131.571	445.286	0.0806928						144.75	999.062	0.0450138
		147.095	555	0.0958884						187.808	1256.31	0.072619
		139.812	421.312	0.114021						150.375	1033.62	0.0494483
		132.062	400.062	0.0952679						146.065	1308.48	0.0344365
		145.429	484.81	0.10962						143.577	1142.73	0.0375726
		144.476	493.333	0.104618						137.5	974.5	0.0378567
		165.528	2166.97	0.0295119						134.938	983.062	0.0345281
		310.889	1738.03	0.126933						182.75	1364.94	0.0622529
		141.81	661.476	0.0674823						167	977.429	0.0719734
		171.5	808.562	0.0960203						116.625	482.438	0.0317243
		159.562	858.5	0.0734842						118.429	595.429	0.0280104
		203.846	918.615	0.123155						115.25	701.438	0.0175083
		179.71	781.903	0.112194						117.667	472.417	0.0355398
		153.192	630.962	0.0935836						116.154	547.577	0.0258448
		135.361	449.611	0.0910072						117.962	458.5	0.0378453
		137.962	456.5	0.0968047						119.615	505.692	0.037504
		134.571	698.238	0.0507885						119.083	564	0.0314353
		129.812	514.875	0.062205						119.412	765.206	0.0221994
		139.083	1450.78	0.0255346						114.048	365.714	0.0362335
		138.962	1513.73	0.024298						124.333	566.238	0.0429395
		247.941	3030.76	0.0490403						124.032	386.484	0.0703628
		313.75	3087.77	0.0702444						125.75	802	0.0302478
		271.55	3306.65	0.0521994						116.205	802.25	0.0163279
		373.683	2249.67	0.125925						155.469	747.875	0.0798718
		220.541	1020.51	0.127738						134.385	703.654	0.0500039
		324.514	2627.14	0.0874162						199.861	920.194	0.117958
		481.312	2141	0.185833						178.4	698.05	0.126106
		528.889	3189.94	0.137897						166.219	582.656	0.131187
		260.808	3490.39	0.0461737						143.375	568	0.0849004
		463.95	2301.93	0.164209						325.885	1925.5	0.12207
										383.25	2263.88	0.129547
										520.81	2882.86	0.150282
										310	2574.04	0.0833998
										593.654	2956.19	0.17205
										359.048	3266.57	0.0806355
										419.375	2551.19	0.129097
										291.971	2368.29	0.0830136
										276.188	1737.38	0.105582
										274.692	1918.85	0.0941245
										346.154	2372.77	0.106858
										308.5	2069.38	0.104179
										308.769	1875.31	0.115823
										296.048	2268.19	0.0887691
										274.412	2383.29	0.0747199
										602.238	1412.81	0.383432
										211.692	1032.62	0.116398
										316.077	1773.38	0.127355
										337.562	2199.94	0.111597
										218.654	1091.73	0.116481
										240.429	1172.48	0.128189
										304.938	1189.06	0.186325
										265.688	956.062	0.191281
										190.125	1296.56	0.0721055
										155.846	601.885	0.104646
										154.667	700.083	0.0850341
										163.238	632.524	0.11275
										165.095	516.524	0.150041
										139.75	539.333	0.0820867
										145.524	589.238	0.0856313
										171.417	586.333	0.141213
										173.762	658.095	0.126845
										140.762	650.333	0.0669283
										159.438	744.875	0.0865641
										156.75	949.8	0.0620652
										154.625	563.25	0.110956
										155.75	630.75	0.0985915
										365.735	1253.82	0.229152
										151.889	487	0.126385
										218.938	1340.25	0.0930676
										152.125	765	0.0726117
										154.167	542.25	0.115348
										141.9	502.95	0.0953612
										148.167	604.083	0.0884419
										144.905	515.762	0.0998219
										154.688	741.625	0.0794214
										165	1209.24	0.0548828
										182.731	1130.46	0.0766229
										194.125	880.312	0.116608
										237.562	1062.25	0.140092
										234.429	988.905	0.148274
										220.731	1012.96	0.129026
										415.706	1233.53	0.278029
										186.167	946.833	0.0976935
										148.562	733.25	0.0705743
										271.524	1004.43	0.187436
										162.333	490.778	0.152979
										258.762	1005.95	0.172776
										491.25	1512.33	0.276617
										309.625	1117	0.204421
										237.333	1047.9	0.142003
										143.85	700.4	0.0664784
										126.625	839.625	0.0298843
										125.381	790.095	0.0302346
										119.333	710.75	0.0240992
										121.25	540.5	0.0382803
										129.312	577.75	0.0526519
										137.857	516.476	0.0820449
										131.562	515.062	0.0665611
										118.583	454	0.0401864
										153.75	636.083	0.093735
										177.688	694.875	0.125568
										130.833	692.417	0.0448165
										142.792	653.25	0.0703434
										213.812	1198.12	0.100554
										353.885	1421.85	0.190593
										175	936.538	0.0853099
										198.625	1005.62	0.105241
										154.25	760.562	0.0764085
										173	649.062	0.127565
										464.188	1502.25	0.259108
										382	1263.38	0.241419
										132.577	519.308	0.068377
										146.238	656.429	0.076306
										138.625	692.938	0.0582818
										337.765	1622.59	0.154498
										456.625	1620.84	0.233662
										155.188	866.062	0.0669118
										144.625	918.625	0.0493693
										144	605.25	0.0797138
										137.75	561.375	0.0735335
										137.417	771.917	0.0494224
										133.273	579	0.0610648
										134.25	532.35	0.0702534
										144	682.7	0.0688195
										265.75	978	0.186485
										190.905	950.048	0.102998
										136.75	535.375	0.0757079
										145	507.25	0.102236
										130.619	548.571	0.059225
										149.231	569.346	0.0975657
										142.167	494.083	0.0983038
										139.81	434.524	0.109285
										122.048	645.762	0.0321805
										139.844	674.031	0.062441
										123.192	481.615	0.0497573
										136.562	550.812	0.0725877
										123.885	475.923	0.0524696
										133.538	462.269	0.0824157
										138.688	419.375	0.111044
										137.714	281.619	0.197526
										143.062	263.75	0.257611
										134.952	310.19	0.154241
										153.059	418.265	0.158996
										141.714	335.19	0.167499
										130.167	308.417	0.130794
										173.75	566	0.152778
										197.667	606.417	0.188956
										173.5	455.417	0.201817
										159.667	379	0.207859
										147.5	365	0.170683
										146.762	282.19	0.251291
										131.417	217.917	0.259201
										135.562	255.25	0.219476
										132.5	223.917	0.254825
										153.062	362.875	0.194682
										131.688	209.312	0.286008
										145.727	322.727	0.197009
										140.5	260.125	0.246314
										142.375	240.625	0.2999
										145.5	276.438	0.252434
										147.333	349.833	0.181039
										158.188	387.75	0.195724
										160.875	442	0.171396
										169.667	428.667	0.206824
										246.45	532.25	0.33982
										144.769	311.692	0.203222
										137.125	282.75	0.192654
										147.238	310.381	0.217295
										166.812	421.438	0.202372
										159.688	401.938	0.191258
										165.615	431.538	0.1921
										141.438	295.812	0.202645
										127.667	277.81	0.140084
										119.875	264.688	0.100042
										157.562	417.125	0.174552
										132.364	262.636	0.186612
										131.531	244.938	0.205766
										129.654	217.962	0.241796
										130.25	241	0.202
