# Supplementary material for: A novel live-cell imaging assay reveals regulation of endosome maturation
Source: eLife. 2021 Nov 30;10:e70982. doi: 10.7554/eLife.70982 (PMC8635980; doi:10.7554/eLife.70982)
Supplement: Figure 13—source data 2. [file elife-70982-fig13-data2.xlsx]

## Sheet: exp1
lysosomes
average				0.121977						0.196071					0.137587
	WT (12 cells)						KO (9 cells)					rescue (7 cells)
		YFP	CFP	ratio				YFP	CFP	ratio			YFP	CFP	ratio			background	YFP	CFP
	1	196.5	1149.25	0.0884699			1	531.03	2928.49	0.151424		1	114.286	241.905	0.0731728				105	115
	4	162	670.714	0.102571			4	562.312	3399.89	0.139217		4	116.095	261.286	0.0758446
	7	254.81	1634.1	0.0986179			7	409.373	2724.59	0.116636		7	116.882	265.147	0.0791358
	10	338.833	1658.58	0.151487			10	531.66	3417.12	0.129208		10	117.962	261.692	0.088362
	13	404.762	2039.43	0.155767			13	405.938	3037.45	0.102974		13	118.189	360.351	0.0537556
	16	243	1375.5	0.10948			16	446.896	2770.58	0.128746		16	118.216	261.135	0.0904369
	19	338.19	1993.62	0.124128			19	610.843	2498.76	0.212203		19	119.192	232.538	0.120744
	22	200.857	1137.95	0.0937063			22	433.572	3259.03	0.104507		22	121.125	280.656	0.0973403
	25	165.81	842.048	0.0836396			25	540.443	3566.55	0.126159		25	122.19	358.881	0.0704852
	28	168.19	822.714	0.0892875			28	492.116	2054.22	0.199625		28	122.892	275.216	0.111674
	31	167.75	479.833	0.171997			31	615.952	1885.51	0.28859		31	122.444	348.139	0.0748223
	34	185.062	1477.75	0.0587503			34	844.794	2599.91	0.297715		34	125.118	335.324	0.091311
	37	179.25	1317.06	0.0617689			37	230.187	1542.63	0.0876885		37	124.923	285.654	0.116745
	40	164.688	800.75	0.0870405			40	275.302	1594.84	0.115082		40	118.676	341.382	0.0604112
	43	170.125	675.688	0.116152			43	312.15	2974.21	0.0724501		43	122.333	279.714	0.105231
	46	188.688	981.75	0.0965538			46	486.773	2644.33	0.150938		46	119.238	359.286	0.0582841
	49	152.905	801.81	0.06975			49	297.417	2203.25	0.0921425		49	116.469	291.5	0.0649802
	52	246.5	1443.38	0.106521			52	307.911	2428.92	0.0876913		52	113.35	238.85	0.0674203
	55	392.438	1352.06	0.232355			55	395.397	2535.06	0.119996		55	122.692	228.654	0.155665
	58	382.583	2119.5	0.13848			58	247.64	1234.35	0.127432		58	120.476	281	0.0932289
	61	431.562	1679.56	0.208724			61	234.508	1308.27	0.108532		61	125.269	272.577	0.128629
	64	294.833	1553.42	0.131974			64	236.589	1177.04	0.123902		64	126.192	307.577	0.110044
	67	335.524	1872.52	0.131164			67	194.971	1684.24	0.057334		67	123.333	253.042	0.132807
	70	417.385	2260.11	0.145626			70	270.935	1199.16	0.153054		70	127.562	393.938	0.0808854
	73	439.769	2596.19	0.134923			73	361.414	1199.13	0.236516		73	127.81	300.524	0.122949
	76	416.476	2197.71	0.149553			76	182.204	643.599	0.146054		76	130.762	372.524	0.100037
	79	455.25	1867.12	0.1999			79	450.85	1303.38	0.291028		79	130.19	323.81	0.120636
	82	367.375	1707.31	0.164776			82	397.625	1352.75	0.236417		82	134.154	332.288	0.134172
	85	350.667	3030.5	0.0842624			85	250.928	785.652	0.217591		85	132.111	350.056	0.115338
	88	344	2503.33	0.10007			88	185.676	482.297	0.219648		88	137.281	420.594	0.105634
	91	349.125	2859.06	0.0889648			91	159.397	370.158	0.213189		91	131.381	290.952	0.149933
	94	309.571	1477.33	0.150162			94	143.892	393.135	0.139831		94	136.656	299.312	0.171752
	97	260.875	1253	0.136973			97	176.47	781.396	0.107249		97	143.238	376.095	0.146452
	100	395.476	1956.43	0.157745			100	153.913	686.942	0.0855209		100	147.419	439.065	0.130897
	103	382.375	1984.94	0.148334			103	167.904	1144.85	0.0610806		103	145	497.25	0.104644
	106	398.857	1571.9	0.201699			106	187.206	751.971	0.129058		106	140.625	469.625	0.100458
	109	266.115	1231.5	0.144304			109	203.917	771.233	0.150735		109	123.308	262.308	0.124284
	112	168.083	1027.67	0.0691194			112	368.423	695.538	0.453757		112	133.839	335.323	0.130894
	115	156.929	621.429	0.10254			115	202.535	1422.08	0.0746206		115	127.125	293.25	0.124123
	118	148.484	562.129	0.0972516			118	153.006	878.881	0.0628449		118	129.286	285.286	0.142619
	121	169.962	1460	0.0482989			121	148.085	653.056	0.0800753		121	126.594	246.172	0.164624
	124	193.524	1446.48	0.0664856			124	172.323	724.004	0.110546		124	140.154	367.574	0.139183
	127	165.5	1056.38	0.0642677			127	193.243	929.943	0.108281		127	147.192	540.846	0.0990781
	130	150.19	666.048	0.0820074			130	247.382	813.853	0.203737		130	145.841	481.341	0.111484
	133	140.875	1094.19	0.0366375			133	128.041	1078.53	0.0239132		133	141.212	542.885	0.0846302
	136	144.857	657.321	0.0734934			136	234.508	1308.27	0.108532		136	136.25	384.5	0.115955
	139	148.562	920.625	0.0540723			139	236.589	1177.04	0.123902		139	132.429	346.238	0.118618
	142	373.528	2007.19	0.141914			142	194.971	1684.24	0.057334		142	135.657	462.337	0.088263
	145	229.95	1010	0.139609			145	270.935	1199.16	0.153054		145	150.476	439.429	0.140172
	148	400.562	1551.06	0.205814			148	361.414	1199.13	0.236516		148	152.068	577	0.101879
	151	227.095	1080.33	0.12648			151	182.204	643.599	0.146054		151	147.784	422.73	0.139031
	154	222.714	1770	0.0711263			154	450.85	1303.38	0.291028		154	151.615	557.654	0.105308
	157	306.125	1671	0.129258			157	397.625	1352.75	0.236417		157	145.8	434.2	0.12782
	160	388.095	1308.05	0.237287			160	250.928	785.652	0.217591		160	139.154	479.846	0.0936121
	163	248.15	954.65	0.170488			163	185.676	482.297	0.219648		163	253.647	1103.56	0.150367
	166	309	1696.04	0.129029			166	159.397	370.158	0.213189		166	326.476	1141.76	0.215703
	169	203.594	1504.34	0.0709644			169	143.892	393.135	0.139831		169	232.735	1013.97	0.14209
	172	252.938	1609.75	0.0989717			172	176.47	781.396	0.107249		172	316.875	1417.06	0.162723
	175	225.423	1251.77	0.105934			175	153.913	686.942	0.0855209		175	304.333	1503.1	0.143602
	178	168.538	708.346	0.107084			178	167.904	1144.85	0.0610806		178	282	1332.95	0.145326
	181	182.583	833.042	0.108048			181	187.206	751.971	0.129058		181	300.75	1295.19	0.165863
	184	193.75	532.083	0.212787			184	203.917	771.233	0.150735		184	477.417	1378.67	0.294711
	187	179.917	567.083	0.165715			187	368.423	695.538	0.453757		187	403	1295.12	0.252516
	190	189.5	532.75	0.202274			190	202.535	1422.08	0.0746206		190	471.952	1319.48	0.304657
	193	478.381	1727.1	0.231612			193	153.006	878.881	0.0628449		193	442.147	1353.97	0.272119
	196	534.625	1789.12	0.256627			196	148.085	653.056	0.0800753		196	385.833	1240.42	0.249537
	199	478.25	2976.42	0.130442			199	172.323	724.004	0.110546		199	395.917	1042.25	0.313742
	202	385.125	2079	0.14263			202	193.243	929.943	0.108281		202	308.524	1036.38	0.22089
	205	231.417	1443.75	0.0951398			205	247.382	813.853	0.203737		205	247.062	593.938	0.296619
	208	434.5	1966.62	0.177952			208	128.041	1078.53	0.0239132		208	177.917	492	0.193414
	211	134.531	842.844	0.0405733			211	114.673	321.817	0.0467708		211	186	549.75	0.186314
	214	140.524	834.762	0.0493552			214	122.942	184.841	0.256898		214	177.381	618.571	0.143735
	217	145	820.583	0.0566907			217	126.74	264.815	0.145112		217	160	625.81	0.107672
	220	173.381	1479.62	0.05011			220	137.364	346.887	0.139568		220	159.714	712.571	0.0915607
	223	190.833	1658.5	0.0556093			223	192.182	480.886	0.238276		223	173.25	790.833	0.100986
	226	153.143	1033.14	0.0524352			226	158.653	427.354	0.17177		226	168.75	880.25	0.0833061
	229	170.333	1483.86	0.0477281			229	233.088	506.562	0.327121		229	153	729.762	0.078079
	232	166.923	1808.04	0.0365751			232	258.824	369.265	0.604975		232	152.231	560.885	0.105926
	235	147.125	894.062	0.0540714			235	149.49	395.175	0.158794		235	137.471	524.176	0.079357
	238	150	1266.25	0.0390879			238	133.753	330.482	0.133436		238	135.231	569.731	0.0664811
	241	137.429	674.333	0.057978			241	139.946	379.887	0.131928		241	133.846	424.462	0.0932134
	244	137.375	816.812	0.0461306			244	130.846	320.312	0.125886		244	200.667	875.083	0.125864
	247	141.238	916.381	0.0452194			247	135.33	386.613	0.111666		247	156.125	587	0.108316
	250	138.571	739.667	0.0537422			250	142.318	423.781	0.120856		250	482.167	1135.42	0.36962
	253	150.654	1592.5	0.0308995			253	143.01	341.693	0.167672		253	437.905	1276.48	0.286622
	256	148.625	1300.62	0.0367949			256	163.32	409.73	0.197876		256	471.938	1230.12	0.329055
	259	284.727	1761.27	0.109172			259	150.181	395.47	0.16109		259	374.417	991.083	0.307525
	262	271.636	1511.36	0.119336			262	118.988	516.145	0.0348702		262	309.062	1113.5	0.204369
	265	180.875	1731.81	0.0469288			265	120.185	281.57	0.0911629		265	180.469	676.5	0.134406
	268	164.938	1627.5	0.0396284			268	120.136	263.205	0.102129		268	200.538	660.923	0.175003
	271	221.81	1514.57	0.0834613			271	129.562	282.741	0.146428		271	181.476	524.19	0.186896
	274	240	1843.38	0.078108			274	124.564	295.742	0.108243		274	216.81	726.81	0.182753
	277	374.062	2242.06	0.126495			277	181.486	332.1	0.352308		277	238.833	599.583	0.276182
	280	401.583	2447.17	0.127171			280	132.727	251.605	0.202972		280	153.583	441.167	0.148951
	283	413.5	2150.5	0.15156			283	142.67	176.142	0.616107		283	323.7	867.15	0.290766
	286	163.286	1594.9	0.039385			286	132.406	181.239	0.413744		286	165.269	362.692	0.243322
	289	254.083	1392	0.116745			289	122.569	165.38	0.34873		289	133.846	393.115	0.10372
	292	245.5	1403.75	0.10902			292	130.379	172.824	0.438901		292	128.094	254.812	0.165179
	295	173.6	1151.9	0.0661587			295	135.66	208.391	0.328297		295	122.25	242.25	0.13556
	298	429.375	2050.44	0.167598			298	145	197.176	0.48676		298	138.523	392.205	0.120932
	301	445.85	1865.25	0.194744			301	159.223	259.012	0.376517		301	163.808	635.615	0.112959
	304	262.125	1969.94	0.0847063			304	605.495	3788.73	0.136236		304	166.692	556.192	0.13983
	307	194.125	1615.75	0.059387			307	623.587	3711.61	0.144188		307	184.423	927.615	0.0977376
	310	261.381	1859.05	0.0896655			310	490.306	2259.55	0.179667		310	213	1508.59	0.0774976
	313	164.438	1581.66	0.0405262			313	499.876	2368.21	0.17525		313	183.5	1046.42	0.0842802
	316	168.25	1807	0.0373818			316	278.25	1580	0.118259		316	363.094	1986.25	0.137926
	319	209.583	1249.58	0.0921775			319	218.511	788.205	0.168613		319	240.643	1792.75	0.0808482
	322	207.062	965.875	0.119949			322	177.382	619.668	0.143425		322	214.844	1141.66	0.106992
	325	232.562	1353.12	0.103028			325	178.154	539.5	0.17233		325	247.462	2611.08	0.0570744
	328	254.25	1530.5	0.10544			328	367.3	559.071	0.590671		328	169.688	1272.5	0.055886
	331	272.5	1382.75	0.132124			331	228.551	596.821	0.256425		331	181.731	1606.73	0.0514376
	334	291.625	1384.88	0.146963			334	362.827	709.692	0.433547		334	201.688	1812.31	0.0569654
	337	408.75	1952.17	0.165336			337	411.183	932.596	0.374492		337	278.143	1989.19	0.0923828
	340	309.25	1676.25	0.130825			340	392.515	1176.04	0.270974		340	218.062	1735	0.0697914
	343	362.5	1831.94	0.149976			343	395.402	1031.52	0.316854		343	405.625	2286.69	0.138429
	346	199.125	910	0.118396			346	402.63	977.582	0.345045		346	416.875	2761	0.117867
	349	191.952	755.619	0.135731			349	374.682	1002.43	0.303892		349	392.905	2218.57	0.136865
	352	500.6	2958.05	0.139146			352	394.145	1055.78	0.307345		352	402	2315.31	0.134981
	355	534.188	2990.31	0.149267			355	410.531	783.328	0.457157		355	399.562	2557.19	0.120614
	358	484.438	2826.06	0.139959			358	387.567	833.367	0.393346		358	176.905	1416.67	0.0552407
	361	447.455	2681.82	0.133416			361	439.288	688.15	0.583247		361	197.938	1795.38	0.0553079
	364	413.417	2591.08	0.124558			364	403.273	772.608	0.453573		364	171.7	2104.4	0.0335277
	367	352.5	3149.25	0.0815688			367	168.502	635.278	0.122054		367	193.3	3957.35	0.0229807
	370	472.476	2825.95	0.135552			370	187.748	706.589	0.139874		370	238.346	3231.35	0.0427892
	373	447.885	3165.19	0.112414								373	189.429	2921.76	0.0300806
	376	424.308	2254.58	0.149239								376	175.381	1769.48	0.0425398
	379	468.75	2534.83	0.15032								379	354.941	2019.23	0.131255
	382	361.125	2474.56	0.108548								382	392.095	2869.62	0.104223
	385	274	1628.94	0.111629								385	389.8	2065.5	0.146014
	388	294.75	3080.44	0.0639872								388	437.833	1883.92	0.188156
	391	270	2836.08	0.0606376								391	235.538	2937.04	0.0462566
	394	246.188	2003.06	0.0747793								394	255.774	2471.07	0.063994
	397	195.962	1848.88	0.0524614								397	459.4	1872.85	0.20161
	400	310.75	2116.5	0.102798								400	188.062	2197.56	0.0398845
	403	224.667	1263.19	0.104222								403	172.062	2378.78	0.0296239
	406	165.25	1002.81	0.0678635								406	188.095	3087.62	0.0279535
	409	143.417	498.333	0.100218								409	175.469	2428.78	0.0304562
	412	144.083	590.833	0.082136								412	170	1949.65	0.0354291
	415	155.083	655.667	0.0926319								415	396.375	3403.94	0.0885924
	418	169.091	916.364	0.0799774								418	367	3538	0.076541
	421	221.25	1090.12	0.119215								421	410.906	2253.38	0.143055
	424	301.562	1710.19	0.123222								424	280.385	3302.85	0.0550168
	427	303.714	1759.24	0.120855								427	365.333	2191.48	0.125373
	430	209	1411.19	0.0802353								430	410.762	2650.52	0.120591
	433	199.5	1565.58	0.0651465								433	456.25	2017.06	0.184668
	436	181.083	1216.83	0.0690513								436	354.032	2196.07	0.119666
	439	221.654	1774.5	0.0702947								439	224.81	3361.05	0.0369095
	442	246.364	2032.09	0.0737388								442	227.875	2831.31	0.045236
	445	305.438	1894.19	0.112657								445	170.077	2481.46	0.0274997
	448	313.727	3964.91	0.0542161								448	162.571	2579.33	0.0233617
	451	336.167	3680.42	0.0648359								451	162.71	1864.97	0.0329777
	454	243.095	1583.43	0.0940427								454	190.917	2081.75	0.0436848
	457	201.143	1162.24	0.0918063								457	201.167	1970.58	0.0518258
	460	225.75	915.333	0.150875								460	179.562	1571.22	0.0512025
	463	278.833	2341.42	0.0780775								463	170.19	1150.19	0.0629739
	466	290.333	1785.25	0.110961								466	174.333	918.619	0.086276
	469	290.909	1564.27	0.128277								469	188.75	1984.62	0.0447951
	472	270.917	1302.42	0.139729								472	199.781	2785.97	0.0354856
	475	303.308	2216.77	0.0943529								475	193.571	2640.81	0.0350664
	478	296.048	1585.38	0.129931								478	208.294	3259.21	0.0328522
	481	366.3	3157.5	0.0858833								481	238.429	2776.09	0.0501406
	484	444.333	3265.33	0.107713								484	197.667	1332.83	0.0760917
	487	460.062	2346.44	0.159118								487	254.381	1697.95	0.0943686
	490	269.19	2798.95	0.0611747								490	162.462	1212.96	0.0523351
	493	273.25	2656.31	0.066206								493	163.115	903.5	0.0737032
	496	319	1178.17	0.201285								496	184.151	571.616	0.173343
	499	380.238	1270.38	0.238223								499	148.484	441.839	0.133044
	502	362.333	1635.11	0.169286								502	146.19	367.759	0.162962
	505	249.833	2259.06	0.0675509								505	187.045	721.295	0.135322
	508	302.812	2353.56	0.0883657								508	138.683	267.517	0.220848
	511	334.25	1364.5	0.183473								511	128.609	302.395	0.125985
	514	345.111	1536.56	0.168907								514	118	331.167	0.0601387
	517	315.188	1542.94	0.147197								517	142.067	800.067	0.0541071
	520	405.692	2267.42	0.139699								520	152.838	619.973	0.0947338
	523	415.5	1357.58	0.249883								523	230.812	689.969	0.218815
	526	262.25	1329.83	0.129442								526	187.031	526.594	0.199301
	529	360.5	3142.69	0.0843878								529	250.538	853.538	0.197062
	532	289.917	2531.33	0.0765279								532	144.059	367.029	0.154978
	535	233	1679	0.0818414								535	132.5	234.853	0.229448
	538	297	2149.75	0.0943605								538	579.083	822.333	0.67024
	541	367.375	2490	0.110474								541	130.613	527.605	0.0620763
	544	321.688	3153.75	0.0713083								544	151.846	524.885	0.114291
	547	297.812	2637.94	0.0764236								547	162.812	477.75	0.159371
	550	205.688	1732.19	0.0622612								550	154.083	515.75	0.122478
	553	404.286	2903.24	0.107339								553	210.75	538.188	0.249889
	556	366.417	2151.58	0.128361								556	178.676	652.147	0.137162
	559	319.875	2603.38	0.0863515								559	129.375	491.875	0.0646766
	562	275.188	1670.75	0.109393								562	136.839	450.839	0.0948044
	565	435.818	2721.18	0.126936								565	140.375	485.438	0.0954951
	568	757.083	3223	0.209808								568	135.524	369.048	0.120151
	571	684	3261.92	0.18399								571	183.083	468	0.221198
	574	535.083	3774.92	0.117512								574	155.083	513.833	0.125574
	577	595.333	2702.42	0.189507								577	127.381	356.762	0.0925745
	580	636	3230.48	0.170439								580	136.638	355.522	0.131539
	583	660.5	3284.38	0.175271								583	127.853	471.676	0.0640722
	586	569.438	3522.25	0.136309								586	150.986	511.478	0.115986
	589	529.375	2761.56	0.16035								589	162.577	394.538	0.205972
	592	486.875	1960.38	0.206936								592	188.524	401.286	0.29175
	595	324.095	1529.95	0.154843								595	117	258.75	0.0834783
	598	305.833	1908.42	0.111983								598	145.381	451.429	0.120028
	601	546.619	3155	0.145269								601	126	383.308	0.0782683
	604	679.25	3404.25	0.174584								604	126.524	521.714	0.0529217
	607	699	3407.38	0.180417								607	120.594	277.75	0.0958157
	610	413.2	3100.85	0.10322								610	138.25	400.5	0.116462
	613	424.438	2774.06	0.120132								613	148.857	426.857	0.140632
	616	335.188	2817.25	0.0851838								616	145.25	364.812	0.161121
	619	460.938	2860.56	0.129641								619	132.5	323	0.132212
	622	306.444	1547.44	0.14063								622	126.25	242.583	0.166558
	625	265	1751.75	0.0977547								625	133.156	397.438	0.0996891
	628	218.375	1372.69	0.0901456								628	120.885	246.577	0.120728
	631	241.5	1280.33	0.117134								631	134.154	337.308	0.131142
	634	190.562	1078.44	0.088809								634	127.583	332	0.104069
	637	314	2808.69	0.0775888								637	139.062	461.562	0.0982854
	640	276.75	1460.62	0.127636								640	139.81	462.952	0.100043
	643	473.583	2598.67	0.148403								643	130.885	333.5	0.118467
	646	415.156	2628.41	0.123401								646	124.048	363.857	0.0765419
	649	478.5	3691.58	0.104429								649	125.643	388.643	0.0754377
	652	322.75	1994.12	0.115878								652	126.062	394.938	0.0752381
	655	401.25	2331.62	0.133649								655	113.762	180.619	0.133528
	658	405.476	2747.71	0.114132								658	116.812	228.688	0.103898
	661	369.833	2527.5	0.109775								661	129.083	278.583	0.147222
	664	428.833	2185.33	0.156416								664	135.231	307.538	0.157013
	667	372.875	2278	0.123844								667	228.824	480.559	0.338725
	670	564.25	3282.25	0.145								670	217.846	438.385	0.348952
	673	323.125	2072.62	0.111423								673	145.278	406.75	0.138057
	676	349.111	1749.11	0.149385								676	123.667	258.333	0.130235
	679	410.375	2796	0.113903								679	222.875	442.312	0.36013
	682	545.083	2659.58	0.172949								682	137.5	287.438	0.188474
	685	512.875	2379.5	0.180117								685	204.154	391.192	0.359004
	688	443.438	2866.81	0.122987								688	119.929	279.286	0.090872
	691	403.333	2543	0.122872								691	129.038	257.615	0.168552
	694	329.75	2709.33	0.0866311								694	131.692	244.346	0.206361
	697	403.25	2534.12	0.123288								697	125.885	257	0.147077
	700	261.625	1379.75	0.123839								700	234.808	455.5	0.381228
	703	262.875	1768.88	0.0954576								703	182.619	366.762	0.308303
	706	210.75	1348.42	0.0857374								706	111.846	163.192	0.142057
	709	315.562	2705.25	0.0812902								709	117.971	207.412	0.140361
	712	311.25	1581.67	0.140625								712	112.429	187	0.103181
	715	290.083	1550.42	0.12894								715	117.19	189.333	0.163992
	718	221.875	1237.19	0.104149								718	118	217.941	0.126286
	721	302.286	2784.52	0.0739031								721	120.905	232.095	0.13583
	724	378.312	2946.94	0.0965106								724	159.941	256.235	0.389004
	727	201.438	1077.81	0.100163								727	118.333	193.333	0.170209
	730	195.727	720.182	0.149917								730	119.19	227.238	0.126428
	733	260.714	1790.07	0.0929596								733	123.125	219.562	0.173342
	736	236.333	1040.25	0.141943								736	129.757	249.486	0.184086
	739	342.25	2818	0.0877728								739	125.731	284.692	0.122168
	742	413.25	2892.25	0.110991								742	123.324	310.27	0.0938393
	745	271	2044.24	0.0860443								745	118.625	260.208	0.0938309
	748	271.125	2192.38	0.0799687								748	118.048	263.714	0.0877389
	751	272.9	2608.1	0.0673459								751	135.677	368.484	0.121021
	754	268.625	2280.75	0.0755512								754	144.781	347.469	0.171124
	757	385.615	698.577	0.480853								757	128.846	222.615	0.221586
	760	266.923	466.308	0.460915								760	133.762	311	0.146745
	763	627.226	697.387	0.896699								763	157.647	504.676	0.135105
	766	275.559	476.794	0.471426								766	114.243	179.378	0.143574
	769	467.226	1052.84	0.386235								769	110.25	196.023	0.0647964
												772	110.188	152.688	0.137657
												775	114.957	181.58	0.149549
												778	110.462	203.731	0.0615568
												781	113.762	180.619	0.133528
												784	116.812	228.688	0.103898
												787	129.083	278.583	0.147222
												790	135.231	307.538	0.157013
												793	228.824	480.559	0.338725
												796	217.846	438.385	0.348952
												799	145.278	406.75	0.138057
												802	123.667	258.333	0.130235
												805	222.875	442.312	0.36013
												808	137.5	287.438	0.188474
												811	204.154	391.192	0.359004
												814	119.929	279.286	0.090872
												817	129.038	257.615	0.168552
												820	131.692	244.346	0.206361
												823	125.885	257	0.147077
												826	234.808	455.5	0.381228
												829	182.619	366.762	0.308303
												832	111.846	163.192	0.142057
												835	117.971	207.412	0.140361
												838	112.429	187	0.103181
												841	117.19	189.333	0.163992
												844	118	217.941	0.126286
												847	120.905	232.095	0.13583
												850	159.941	256.235	0.389004
												853	118.333	193.333	0.170209
												856	119.19	227.238	0.126428
												859	123.125	219.562	0.173342
												862	129.757	249.486	0.184086
												865	125.731	284.692	0.122168
												868	123.324	310.27	0.0938393
												871	118.625	260.208	0.0938309
												874	118.048	263.714	0.0877389
												877	135.677	368.484	0.121021
												880	144.781	347.469	0.171124
												883	128.846	222.615	0.221586
												886	133.762	311	0.146745
												889	157.647	504.676	0.135105
												892	114.243	179.378	0.143574
												895	110.25	196.023	0.0647964
												898	110.188	152.688	0.137657
												901	114.957	181.58	0.149549
												904	110.462	203.731	0.0615568

## Sheet: exp2
lysosomes
	WT	13 cells				KO	18 cells				rescue	8 cells
	YFP	CFP				YFP	CFP				YFP	CFP					background		YFP	CFP
	133.031	683.188	0.0462208			302.013	748.025	0.310518			312.757	886.189	0.268546						107	120
	116.917	714.083	0.016693			275.938	761.987	0.263149			345.85	822.75	0.339879
	117.538	686.538	0.0186007			238.577	711.993	0.222261			236.833	845.267	0.179014
	124.324	1060.79	0.0184142			270.188	970.714	0.191825			241.333	977.905	0.156583
	116.706	828.735	0.0136948			239.247	756.062	0.207915			202.5	773.15	0.146214
	149.462	1079.23	0.0442667			254.387	696.204	0.25579			411.853	829.235	0.429834
	180.19	644.762	0.139473			217.515	782.648	0.166778			241.188	1013.62	0.150161
	125.812	965.438	0.0222512			266.798	1004.8	0.180604			628.129	1043.39	0.564367
	157.923	1571.38	0.0350858			340.616	930.674	0.288175			259.596	563.904	0.343759
	191.062	1420.5	0.0646382			339.096	800.865	0.340884			246.329	640.786	0.267536
	152.409	1358.89	0.0366531			362.481	599.684	0.532603			176.824	484.265	0.191685
	146.147	1358.97	0.0315964			310	731.743	0.331839			397.095	652.571	0.544707
	129	775	0.0335878			229.525	596.675	0.257041			188.938	467.344	0.235899
	132.333	1169.5	0.0241382			234.31	630.736	0.249268			184.038	1277.23	0.066571
	129.476	675.476	0.0404626			416.508	1566.13	0.214026			240.312	1278.53	0.11507
	182.115	596.615	0.157601			294.094	1782.9	0.112511			204.824	1253.32	0.086316
	166.55	1091.77	0.0612801			150.938	545.392	0.103288			208.135	1260.38	0.0886855
	127.139	801.194	0.0295643			151.519	569.058	0.0991386			156.694	1046.31	0.0536475
	127.823	741.402	0.0335097			169.44	1341.19	0.0511306			276.227	1439.55	0.128246
	137.293	985.431	0.0350034			223.875	943.562	0.141914			206.647	969.971	0.117236
	194.535	807.407	0.127341			228.062	991.75	0.138872			194.865	1078.65	0.091655
	204.24	793.077	0.144471			162.081	795.919	0.0814905			212.73	1162.89	0.101382
	177.371	936.855	0.0861487			148.086	1453.1	0.0308199			213.529	1087.65	0.110091
	142.905	551.857	0.0831409			168.655	1015.99	0.0688118			165.531	1077.75	0.061113
	149.686	719.57	0.0711944			267.462	1243.58	0.142814			166.849	1387.17	0.0472303
	169.757	1639.83	0.0412921			209.182	1004.04	0.115585			156.206	800.176	0.072343
	174.529	851.314	0.0923393			196.619	766.048	0.138719			148.853	872.265	0.055636
	155.308	533.923	0.116708			138.528	1229.72	0.0284107			206.615	1315.42	0.0833303
	208.423	599.269	0.21162			130.905	846.81	0.0328903			216.781	1018.75	0.122149
	233.135	1086.7	0.13048			129.346	695.154	0.0388522			177.804	1078.51	0.0738689
	255.136	938.523	0.18098			133.161	1005.85	0.0295322			161.219	1005.66	0.061219
	237.29	840.935	0.180724			143.814	1192.52	0.0343247			332.905	1317.62	0.188628
	217.963	882.25	0.145573			139.442	669.692	0.0590185			313.808	1802.88	0.122889
	160.906	721.875	0.0895634			137.812	619.188	0.0617242			321.312	1555.53	0.149291
	162.441	722.882	0.09196			141.438	819.613	0.0492244			381.438	2324.12	0.124511
	154.054	1228.08	0.0424644			138.75	621.058	0.0633659			428.812	2411.44	0.140441
	225.667	879.435	0.156257			133.66	935.515	0.032691			201.562	1477.25	0.0696718
	157.286	506.952	0.129954			129.482	1111.56	0.0226735			152.714	690.333	0.0801532
	138.559	456.353	0.093827			134.812	362.238	0.114813			279.952	1268.71	0.150561
	185.385	870.192	0.104487			124.346	267.923	0.117264			232.857	1512.81	0.0903619
	235.781	1061.66	0.13676			120.929	364.857	0.0568863			284.143	1571.19	0.122067
	243.714	882.19	0.17937			124.667	533.333	0.0427428			245.875	1435.06	0.105603
	224.853	574.147	0.259504			121.261	390.884	0.0526462			192.375	1168.06	0.0814599
	180.865	911.757	0.0932925			120.423	328.077	0.0645098			366	1661.48	0.168021
	155.75	691.85	0.0852496			119.703	301.405	0.0700256			243.125	1658.38	0.0884862
	152.452	653.29	0.0852294			116.429	243.333	0.0764516			159.538	894.154	0.0678651
	132.269	663.115	0.0465261			133.523	386.093	0.0996757			166.476	937.905	0.0727175
	147.885	703.731	0.0700408			137.653	324.844	0.149641			178.094	800.469	0.104478
	197.429	510.619	0.231502			161.083	562.833	0.12213			289.188	1497	0.132308
	164.731	685.192	0.102144			141.833	309.05	0.184253			298.762	1441.9	0.145065
	127.562	595.75	0.0432202			156.847	387.281	0.186497			256.147	1404.15	0.116145
	187.938	559.438	0.184185			175.088	451.204	0.205577			258.048	1214.48	0.138009
	180.154	573.577	0.161282			240.794	563.794	0.301478			430.875	2183	0.156992
	139.667	646.952	0.0619924			251.062	990.25	0.165541			261.476	2337	0.0696779
	128.619	388.857	0.0804108			278.375	681.875	0.305006			280.703	2620.43	0.0694692
	124.594	463	0.0512945			297.846	667.885	0.348332			296.062	2972.06	0.0662896
	121.562	361.062	0.0604077			181.966	431.011	0.24104			302.583	3287.58	0.0617452
	122.095	334.619	0.0703339			171.558	417.756	0.216815			284.875	3092.62	0.0598377
	126	337.938	0.0871808			132.87	273.681	0.168336			336.115	3800.73	0.0622471
	122.844	331.281	0.0749902			166.941	485.559	0.163971			350	1521.38	0.1734
	129.619	347.762	0.0993098			115.185	150.266	0.270435			422.583	2214.17	0.150696
	128.731	351.192	0.0939955			117.325	170.843	0.203076			424.833	2518.17	0.132532
	125.583	358.583	0.077889			129.096	263.948	0.1535			408.692	2362.73	0.13452
	129.095	473.429	0.0625161			115.278	159.103	0.211697			377.846	2627.61	0.108009
	120.75	330.125	0.0654372			111.643	161.455	0.112001			264.688	2047.12	0.0818255
	128.156	362.469	0.0872524			113.171	153.057	0.186678			196.5	1639.31	0.0589082
	128.048	341.333	0.0950965			113.928	210.667	0.0764115			282.346	2025.96	0.0919987
	125.833	297.25	0.106251			112.23	145.365	0.20619			251.19	1585.38	0.0983976
	127.192	369.115	0.0810549			113.323	155.635	0.177438			242.9	2230.3	0.0643984
	129.688	315.062	0.116312			116.319	166.889	0.198746			246.781	2404.88	0.0611767
	129.676	951.568	0.027269			119.029	186.382	0.181209			283.667	2160.25	0.0865909
	132.3	704.45	0.0432886			117.65	187.275	0.158305			275.885	2450.11	0.0724793
	117.062	332.344	0.0473854			115.765	171.25	0.171024			281.654	1901.65	0.0980291
	134.312	724.125	0.0452092			119.045	187.632	0.178096			274.762	1429.71	0.128091
	138.19	668.19	0.0568963			119.583	188.958	0.182473			292.5	897.625	0.238547
	192.192	864.423	0.11444			112.625	145.066	0.224408			234.083	1257.08	0.111762
	144.432	867.919	0.0500482			117.325	156.706	0.281289			221.875	1192.44	0.107116
	119.808	645.077	0.0243926			124.158	193.274	0.234162			184.85	841.75	0.107863
	179.844	678.062	0.13053			116.938	172.655	0.188738			417.355	2305.23	0.142024
	173.875	587.719	0.142981			112.838	154.721	0.16814			153.882	1674.35	0.0301617
	140.438	604.281	0.0690467			125.39	228.733	0.16913			175.928	1278.35	0.0595053
	148.5	548.5	0.0968495			223.447	777.273	0.177167			184.404	3251.27	0.0247197
	125.429	620.619	0.0368124			322.839	969.645	0.254034			197.35	2935.37	0.0320917
	125.5	661	0.0341959			308.482	881.416	0.264615			165.346	1626.33	0.038734
	169.619	603.048	0.129633			275.154	820.337	0.240104			176.625	1321.38	0.0579544
	161.731	612.346	0.111164			182.678	593.461	0.15984			190.781	2997.38	0.0291172
	203.833	560.25	0.21995			221.876	778.87	0.174353			198.884	1195.38	0.0854434
	120.75	522.625	0.0341509			136.735	279.206	0.186771			167.986	1747.26	0.0374778
	117.692	426.538	0.0348799			200.632	714.179	0.157582			198.843	1475.56	0.0677528
	132.769	698.577	0.0445386			406.159	914.182	0.376688			163.223	1307.76	0.0473354
	174.429	671.238	0.122323			427.419	920.226	0.400411			150.735	1186.2	0.0410195
	173.857	619.238	0.133918			478.731	972.731	0.43593			167.188	1370.94	0.0481143
	154.966	1038.45	0.0522251			550.45	853.25	0.604773			164.882	1500.41	0.041931
	157.808	644.692	0.096834			331.116	1636.35	0.1478			163.6	1741.8	0.0348995
	169.054	824.514	0.0880806			351.438	1475.03	0.180393			156.346	1248.23	0.0437375
	160.423	948.923	0.0644487			296.55	1563.7	0.131295			247.188	2590.75	0.056739
	134.5	741.062	0.044279			334.969	566.188	0.510926			227.429	3094.95	0.040481
	136.029	666.5	0.053118			495.875	791.844	0.578817			337	2549.96	0.0946517
	202.824	891.5	0.124205			399.186	1529.76	0.207259			210.192	2610.19	0.0414394
	155.583	886.889	0.0633508			247.296	758.312	0.219792			239.314	1614.17	0.0885535
	172.613	1415.44	0.050649			374.453	896.97	0.344226			183.794	1499.79	0.0556561
	208.577	2309	0.0464034			407.62	987.133	0.346683			223.188	2199.5	0.055873
	174.857	1426.9	0.0519219			456.973	1108.49	0.354048			152.981	1026.96	0.0506978
	225.73	1640.73	0.0780743			479.75	2287.33	0.171986			147.847	769.726	0.062868
	300.5	2095.81	0.0979344			634.953	3401.55	0.160885			189.23	1300.09	0.0696813
	302.118	2524.65	0.0811421			646.971	3382.61	0.165503			176.05	1483.4	0.0506454
	273.432	2236.95	0.0786189			267.108	2951.72	0.0565408			301.615	2380.42	0.0860967
	221.55	2492.25	0.0482875			406.98	2503.14	0.125876			235.647	1687.29	0.0820822
	225.161	2644.29	0.0468096			475.157	3415.57	0.111713			239.667	2422.62	0.0576157
	186.097	2438.48	0.0341158			474.311	3872.41	0.0978867			186.865	1479.06	0.058765
	155.346	2345	0.0217285			549.375	3387.83	0.135373			217.423	2075.31	0.0564735
	191.375	2370.5	0.0374917			690.271	3395.11	0.178092			222.438	1700.38	0.0730447
	302.206	2387.21	0.0860998			564.688	2305.72	0.209399			195.905	2140.29	0.0440061
	215.058	2606.13	0.0434644			508.608	2871.73	0.145947			186.583	2427.58	0.0344876
	253.731	2044.81	0.0762315			466.569	3861.1	0.0961132			277.294	1935.29	0.0938107
	283.308	2167.04	0.0861283			513.86	2777.36	0.153107			304.25	2971.95	0.0691632
	242.219	2056.78	0.0698164			300.645	1531.07	0.137233			236.51	2568.99	0.0528831
	227.423	2265.5	0.0561282			517.458	2044.97	0.213228			232.259	1937.29	0.0689263
	162.5	1373.66	0.0442705			212.455	1480.02	0.0775392			376.029	2662.24	0.105824
	309.462	2061.69	0.104271			468.375	1477.12	0.26628			161.649	1246.78	0.0485
	157.795	2709.25	0.0196176			404.25	1152	0.288033			148.406	1769.84	0.0250969
	144.115	1897.27	0.0208832			202.125	773.562	0.145549			153.312	1759.84	0.0282417
	157.281	1627.25	0.0333594			158.613	389.711	0.191364			206.161	1838.75	0.0576937
	152.905	1920.1	0.0255014			180.5	656.429	0.137017			252.194	3288.31	0.045827
	198.318	2869.91	0.0332076			155.495	491.184	0.130649			320.115	3740.69	0.0588603
	152.269	2020.15	0.0238239			207.735	539.669	0.240034			291.619	2466.09	0.078692
	146.844	1829.91	0.0233019								238.205	2360.43	0.0585624
	142.912	1191	0.0335313								357.25	1709.5	0.157439
	178.118	2141.91	0.0351736								175.731	1070.23	0.0723308
	161.029	2161.21	0.0264692								146.333	851.083	0.053801
	143.429	1575.05	0.0250363								202.476	926.762	0.118345
	140.308	1883.58	0.0188866								161.5	1244.15	0.0484809
	139.559	1241.62	0.0290286								176.562	995.75	0.0794313
	137.676	1070.53	0.0322726								223.29	1973.1	0.0627544
	141.662	1016.46	0.0386653								200.938	1932.69	0.0518225
	138.568	1228.32	0.0284826								180.15	1647.1	0.0479013
	137.688	1734.22	0.0190111								176.375	1414.5	0.0535921
	142.25	1904.38	0.0197548								240.688	1469.19	0.0990877
	151.762	1763.33	0.0272385								250.429	2109.95	0.0720766
	153.25	1538.58	0.032603								236.762	1102.24	0.132109
	141.765	2414.59	0.0151509								177.357	1075.14	0.0736612
	199.642	1423.01	0.0710983								198.312	858.625	0.123624
	245.259	1561.44	0.0959174								251.571	1687.57	0.0922261
	250.676	2480.03	0.0608789								199.75	1911.38	0.0517759
	234.462	1385.92	0.100687								335.714	2159.33	0.112151
	146.412	2035.53	0.020575								290.438	1964.56	0.099448
	142.062	1723.09	0.0218715								295.438	2337.19	0.0849896
	180.581	1525.48	0.0523528								228.571	1757.48	0.0742429
	254.318	2203.07	0.0707216								264.812	1764.69	0.0959525
	168.157	2237.23	0.0288854								219.417	1511.67	0.0807787
	156.443	2438.2	0.0213282								351.19	1787.05	0.14648
	174.524	2256.95	0.0315983								383.688	1696.44	0.175515
	253.077	2286.19	0.0674349								222.714	1829.1	0.0677048
	264.417	1884.83	0.0891965								305.25	1710.5	0.124646
	154.769	1441.81	0.0361391								234.952	1117.29	0.1283
	209.742	1778.64	0.0619433								299.5	1769.5	0.116702
	186.938	1978.69	0.0430078								285.286	1678.76	0.114377
	274.231	1302.65	0.141403								280.062	1046.12	0.186867
	184.57	1616.86	0.0518218								329.875	1367.44	0.178666
	155.409	2053.64	0.0250352								184.125	1160.62	0.0741141
	131.018	983.661	0.0278095								152	661.19	0.0831501
	135.841	987.727	0.0332374								149.562	788.875	0.0636322
	151.621	814.948	0.0642077								134.81	998.81	0.0316451
	146.438	1453.88	0.0295665								197.265	898.706	0.115917
	141.797	950.667	0.0418904								381.524	1546.76	0.192411
	146.048	858.333	0.0528867								223	522.038	0.28853
	148.438	2507.38	0.0173571								210.451	446.275	0.317067
	138.8	1719.35	0.0198831								248.25	586.938	0.302503
	132.731	1280.42	0.0221738								122.038	245.654	0.119678
	186.857	1870.43	0.0456214								124.25	254.938	0.127836
	168.095	1883.67	0.0346409								120.154	234.346	0.115037
	155.312	1715.75	0.0302754								134.238	289.286	0.160899
	145.583	1952.08	0.0210596								241.235	562.176	0.303578
	147.188	1837.5	0.0233991								134.875	291.938	0.162122
	225.062	1086	0.122217								131.094	268.812	0.161909
	130.81	1419.86	0.0183174								140.714	311.19	0.176338
	131.095	1046.1	0.0260178								192.523	513.182	0.217515
	140.286	1069.43	0.035059								165.385	476.654	0.163702
	135.81	1080.29	0.0300015								214.062	499.562	0.282067
	135.115	978.5	0.032749								404.5	671.5	0.539438
	127.462	1706.85	0.0128948								315.812	2409.75	0.0911942
	128.312	2086.56	0.0108372								270.143	2264.76	0.0760658
	124.923	1639.38	0.0117962								256.192	2193	0.0719691
	129.429	1376.76	0.0178467								306.656	2828.84	0.0737052
	136.962	1338.85	0.0245823								299.962	3395.69	0.0589072
	209.588	1315.35	0.0858223								293.188	3009.5	0.0644361
	219.35	1301.95	0.0950548								291.844	2188.16	0.0893762
	169.19	1482.71	0.0456369								277	2409.19	0.0742621
	143.231	1525	0.0257872								261.75	2786.1	0.0580436
	127.688	1188.06	0.0193697								328.375	2056.94	0.114291
	128.5	996.083	0.0245411								312.062	2140.12	0.10151
	153.25	1649.38	0.0302411								270.692	1930.35	0.0904203
	258.81	913.905	0.191219								294.312	2264.25	0.0873555
	169.346	1243.62	0.055487								301.667	2219.57	0.0927175
	219.905	1441.24	0.0854539								211.062	2529.94	0.0431804
	132.385	1940.65	0.0139428								218.219	3438.88	0.0335111
	135.667	2032.92	0.014986								285.812	2339.69	0.0805573
	136.095	1385.05	0.0229991								253.812	2021.94	0.0771907
	134	1591.5	0.0183486								314.938	2455.12	0.0890479
	130.25	744.25	0.0372447								215.062	2367.75	0.0480756
	127	885.438	0.0261288								175.126	464.387	0.197818
	128.524	962.571	0.0255456								172.708	724.49	0.1087
	126.625	821.75	0.0279658								253.541	1383.27	0.116001
	129.562	1324.12	0.0187373
	123.75	700	0.0288793
	120.375	615.812	0.026976
	115.577	694.077	0.0149405
	115.375	641.688	0.0160537
	113.731	535.423	0.0162028
	114.438	552.625	0.0171927
	126.833	352.667	0.085242
	121.769	319.346	0.0740873
	133.875	354.375	0.114667
	130.095	310	0.121553
	132.824	333.353	0.121039
	129.971	319.588	0.115092
	142.5	321.438	0.176233
	115.625	240.125	0.0718002
	139.731	494.615	0.0873724
	138.048	497.095	0.0823347
	132.5	412.333	0.0872293
	137.281	358.719	0.126848
	144.381	437.095	0.117886
	216.115	615.538	0.220195
	230.742	579.129	0.269515
	157.654	543.538	0.119597
	183.042	488.958	0.206099
	130.062	346.938	0.101622
	131.5	385.938	0.0921267
	174.19	442.571	0.208295

## Sheet: exp3
lysosomes		WT (9 cells)				KO (20 cells)				Rescue (11 cells)
		YFP	CFP			YFP	CFP			YFP	CFP					background
		132	876.346	0.0355101		118.873	801.38	0.0202413		149.529	468.676	0.12626
		139.062	945	0.0410881		130.86	340.368	0.115257		159.619	552.524	0.125123				YFP	CFP
		143.083	914.417	0.0476981		115.729	227.057	0.096608		203.833	596.583	0.205652				105	116
		156	1118.04	0.0508963		114.883	313.8	0.0499646		254.381	690.667	0.259944
		153.917	993.917	0.0557194		113.045	275.295	0.0505038		241.038	874.308	0.179397
		153.25	1515.5	0.0344766		114.203	927.71	0.0113378		270	707.875	0.278775
		150	770	0.0688073		118.083	654.839	0.02428		228.806	611.935	0.249642
		156.81	743.571	0.0825564		120.455	494.932	0.0407857		146.885	408.538	0.143178
		167.767	1038.17	0.0680647		113.681	581.174	0.0186618		202.227	638.205	0.186186
		165.171	982.171	0.0694678		118.808	920.135	0.0171712		167.269	662.846	0.113869
		279.735	2988.85	0.0608228		120.882	871.431	0.0210238		275.151	707.286	0.287764
		176.048	2783.05	0.0266392		115.864	443.477	0.0331748		260.781	564	0.347725
		161.625	1715.25	0.0354072		121.135	689.923	0.0281135		168.056	372.833	0.245514
		161.645	2269.23	0.026307		116.886	501.171	0.030859		221.192	994.077	0.132326
		240.952	3282.95	0.0429283		124.833	211.708	0.207224		255.944	648.889	0.283256
		260.875	2246.31	0.07317		132.306	361.694	0.111138		328.765	719.971	0.37049
		205.75	1668.5	0.0648953		165.483	303.867	0.321946		135.922	456.157	0.0909051
		289.619	2600.81	0.074299		116.646	429.456	0.0371535		152.9	384.2	0.178598
		200.562	2428	0.041333		113.227	391.932	0.0298153		130.808	360.154	0.105704
		216.625	2344.06	0.0500996		111.654	228.923	0.0589251		307.667	644.714	0.383321
		322.273	2366.34	0.0965511		134.128	647.779	0.0547746		218.882	639.843	0.217397
		365.5	2407.09	0.113701		114.919	307.054	0.0519173		143.25	514.25	0.0960452
		167.15	2569.3	0.0253332		130.957	405.629	0.0896216		134.55	391.45	0.107279
		166	1247.92	0.0538909		118.033	289.567	0.0750892		134.688	377.688	0.113448
		182	1243.75	0.0682775		116.329	1141.57	0.0110465		133.5	368.75	0.11276
		229.25	2820.92	0.0459349		119.588	871.413	0.0193113		138.455	335.364	0.152509
		156.269	1307.65	0.0430234		117.885	907.462	0.01628		178.095	453.667	0.216471
		260.619	2707.24	0.0600558		113.206	588.647	0.0173618		142.286	371.714	0.145811
		297.5	2800.31	0.0717131		122.5	1238.43	0.0155912		190.5	503.212	0.220809
		194.5	1397.33	0.0698491		122.614	989.157	0.0201728		143.118	484.5	0.103441
		388.429	2767.38	0.106899		115.271	516.214	0.0256638		151.412	443.206	0.141843
		329.5	2166.12	0.109506		117	521.476	0.0295948		134.235	337.765	0.131829
		324.808	2777.89	0.0825761		123.806	586.369	0.0399814		266.154	747.308	0.25527
		247.269	2644.5	0.0562662		124.138	720.345	0.0316673		152.571	606.762	0.0969329
		189.706	2561.03	0.0346442		153.387	620.032	0.0959999		166.952	798.048	0.0908323
		412.5	3173.3	0.100579		120.069	889.593	0.0194792		141.091	729.182	0.0588585
		148	1046.31	0.0462211		123.528	1139.61	0.0181006		158.5	572.731	0.117137
		154.038	1101.42	0.0497634		122.641	881.089	0.0230574		129.125	362.625	0.0978206
		381.176	3249.38	0.0881399		127.39	1135.47	0.0219625		130.385	411.154	0.0860059
		349.385	2146.35	0.120366		133.615	1236.12	0.0255465		218.083	638.833	0.216289
		245.692	2661.15	0.0552784		122.25	787.719	0.0256804		178.538	560.769	0.16534
		285.769	1577.38	0.123697		120.569	840.529	0.0214884		144.19	453.667	0.116061
		408	1340.23	0.247502		116.25	530.818	0.0271203		224.038	555.615	0.270778
		413.667	2651.57	0.121735		127.919	848.035	0.0313086		261	770	0.238532
		133.192	2250.39	0.0132085		109.324	346.294	0.018776		243.714	539.143	0.327818
		140.429	1714.67	0.0221616		110.995	405.266	0.0207249		202	660.25	0.178227
		143.038	2049.19	0.0196763		111.495	325.784	0.0309604		194	563.762	0.198766
		143.375	1712.12	0.0240426		110.481	506.394	0.0140397		136.812	435.5	0.0995681
		147.25	2033.5	0.0220339		113	375.769	0.0307966		133.577	405.846	0.0985937
		151.441	1901.56	0.0260092		304.096	1032.69	0.217191		138.119	520.403	0.081896
		146.231	1609.19	0.0276127		316.898	784.321	0.31706		201.5	571.25	0.211971
		152.05	2347.4	0.0210854		212.401	1277.22	0.0924899		126.459	255.378	0.153963
		155.5	2379.33	0.0223122		288.786	1201.61	0.169294		157.833	269.583	0.344003
		150.952	3165.43	0.0150691		174.896	1189.49	0.0651107		127.81	276.095	0.142478
		147.308	1000.77	0.0478181		369.262	963.312	0.311883		118.8	253.3	0.10051
		151.952	1942.52	0.0257057		138.471	448.787	0.100578		115.188	207.938	0.110814
		130.231	1105.15	0.0255077		244.338	1311.4	0.116562		126.341	318.182	0.105553
		135.562	1923.19	0.0169114		618.247	2047.43	0.265734		127.932	332.136	0.1061
		147.143	1322.05	0.0349431		570.288	1741.82	0.286186		149.312	260.812	0.305997
		144.154	974.346	0.0456156		286.438	1186.46	0.169496		141.795	330.023	0.171921
		142.429	993.762	0.0426414		318.472	1430.06	0.162452		125.75	261.625	0.142489
		204.938	2529.25	0.0414122		361.758	1065.86	0.270313		135.615	258.346	0.215075
		195.762	2256.67	0.0423989		291.688	957.052	0.22197		158.462	300.308	0.290069
		188.75	2029.81	0.0437608		661.795	1947.36	0.304034		138.538	279.808	0.20474
		191	1587.76	0.0584334		352.356	1259.84	0.21625		142.667	265.905	0.251272
		177.8	1780.53	0.043736		523.927	1541.44	0.293894		167.2	308.383	0.323313
		231.944	1943.94	0.0694463		464.278	2693	0.139417		121.657	257.129	0.118027
		218.938	1176.44	0.107444		238.786	1549.81	0.093308		122.385	227.115	0.15646
		520.5	2623.42	0.165708		391.25	2437.92	0.123282		182.286	2070.95	0.0395335
		501.659	2984.34	0.138289		668.11	3096.04	0.18896		167.905	1987.1	0.0336194
		723.619	3367.81	0.190238		843.884	2504.23	0.309385		191.875	1057	0.092322
		530.794	2291.15	0.195754		528.529	2132.52	0.21003		196.875	2037.06	0.0478251
		423.871	2485.23	0.134589		268.5	2424.97	0.0708107		190.615	1043.12	0.0923456
		325.257	2813.97	0.081638		340.954	2954.54	0.0831252		261.5	1740.96	0.0963099
		512	2837.33	0.149559		794.25	3219.22	0.222108		252.938	1494.12	0.107347
		141.85	1053.05	0.0393255		759	2910.62	0.234021		230.344	1180.81	0.117715
		210.812	1446.19	0.0795467		690.074	2609.51	0.234639		171.143	1339.19	0.0540742
		192.156	2042.59	0.0452384		616.747	3519.52	0.150358		154.269	753.538	0.0772801
		191.818	1516	0.0620129		670.013	3404.91	0.171793		221.381	1282.19	0.0997959
		273.128	2210.69	0.0802641		382.875	2287.95	0.127938		215.095	2222.24	0.0522709
		177.899	2374.05	0.032284		189.833	2098	0.0428017		219.857	1882.14	0.0650327
		167.25	1613.47	0.0415701		175.048	1760.02	0.0426077		234.615	3134.04	0.0429468
		172	1158.27	0.0642828		198.072	1354.03	0.0751776		250.808	2970.23	0.0510849
		200.219	1928.16	0.0525446		485.381	1466.48	0.281664		346.154	2677.85	0.0941329
		206.095	1097.9	0.102958		502.952	1266.62	0.345859		254.962	2236	0.0707368
		249	1910.34	0.0802523		454.857	1005.94	0.393123		525.346	3459.81	0.125709
		217.938	2499.62	0.0473808		449.059	995.941	0.391002		608.625	2915	0.17993
		193.717	2410.37	0.0386673		577.522	2637.29	0.187413		503.167	2981.83	0.138936
		239.843	2039.87	0.0700894		313.984	2695.28	0.0810243		345.031	3532.19	0.0702628
		302.727	2407.07	0.0863034		236.943	2069.77	0.0675325		526.885	2696.58	0.163485
		141.381	1489.52	0.0264873		392.496	3302.76	0.0902158		297.613	3343.74	0.0596742
		146.346	1243.96	0.0366555		519.534	3373.96	0.127237		278.139	2918.94	0.0617704
		137.269	872.962	0.0426296		596.084	2740.93	0.187084		232.594	2487.38	0.0538059
		143.583	866.167	0.0514325		664.757	2159.31	0.273946		236.312	1717.53	0.0819915
		157.804	1157	0.0507243		553.317	2012.17	0.236433		209.19	2769.81	0.0392605
		145.615	828.154	0.0570312		552.433	2903.79	0.160497		222.769	2603	0.0473538
		180.714	2415.09	0.0329321		765.8	2083.81	0.335804		226.962	2073.81	0.0622952
		181.833	3221	0.0247449		603.277	2454.89	0.21304		489.031	3316.03	0.120009
		183.5	2554.65	0.0321899		455.619	976.429	0.407493		378.031	2889.84	0.0984306
		170.952	1434.05	0.0500376		678.673	2277.04	0.265462		437.462	3343	0.103025
		166.905	1387.9	0.0486711		764.455	1979.86	0.353811		336.054	3063.68	0.0783851
		172.281	1690.34	0.0427359		234.295	2284.43	0.059626		275.812	3006.38	0.0590968
		177.656	2286.12	0.0334801		683.872	1767.23	0.35057		285.4	3521.2	0.0529778
		162.75	914.75	0.0723005		238.304	2948.01	0.0470705		437.471	3407.32	0.101014
		175.238	2342.29	0.0315494		229.779	1794.49	0.0743401		541.75	2242.44	0.20539
		203.455	1802.87	0.0583656		543.635	2833.46	0.161413		295.1	3049.5	0.0648031
		399.048	1220.57	0.26621		591.745	3078.49	0.164303		322.562	2217.56	0.103524
		230.048	2177.76	0.060651		257.052	1241.71	0.135072		439.562	2366.69	0.148649
		179.529	2424.12	0.0322899		345.688	1357.81	0.19382		358.032	2560.1	0.103528
		176.25	2423.94	0.0308717		337.083	2834.95	0.0853576		385.25	2349.31	0.125486
		182.083	1547.42	0.0538508		458.833	3110.73	0.118152		353.077	3077.35	0.0837717
		191.05	1491.55	0.0625568		587.533	3248.73	0.15403		337.038	2330.81	0.104767
		206.812	2532.5	0.042132		311.355	2306.06	0.0942236		300.5	3121.69	0.0650433
		170.353	1789.44	0.0390531		293.45	1987.67	0.100686		220.375	1701.12	0.0727861
		267	2873.88	0.0587409		1053.74	1899.69	0.531896		333.81	2221.91	0.108652
		187.188	2934.38	0.0291615		510.065	2802.53	0.150776		272.429	2039.57	0.0870407
		290.81	3141.71	0.0614103		253.942	3335.59	0.0462612		264.619	2363.57	0.0710184
		179.688	1959.31	0.0405184		282.943	3357.96	0.0548875		290	3347	0.0572578
		172.353	2160.5	0.0329435		606.887	2285.73	0.231313		279.238	3159.19	0.0572551
		209.8	1739.4	0.0645559		274.958	2791.11	0.0635332		248.6	2614.25	0.0574802
		264.077	3139.39	0.0526155		429.545	2339.64	0.145952		206.688	3116.41	0.0338914
		204.735	2532.71	0.041269		388.782	2348.94	0.127089		201	1549.25	0.0669806
		420.462	2216.81	0.150162		511.558	3225.55	0.130745		232.7	1289.1	0.108857
		270.442	2190.02	0.0797688		609.062	2842.24	0.184893		130.962	1533.85	0.0183109
		320.05	1793.9	0.128166		506.87	2278.79	0.185811		133.312	999.438	0.0320475
		202.4	2466.2	0.0414433		311.274	1859.01	0.118344		145.5	958.375	0.0480783
		172.857	2375.29	0.0300347		618.929	2453.79	0.219836		137.971	1475.03	0.0242607
		292.038	2545.08	0.0769996		193.441	1625.62	0.058585		153.75	1008.5	0.0546218
		301.923	2133.54	0.0976056		444.19	1688.19	0.215744		189.417	1737.42	0.0520637
		198.615	2093.19	0.0473475		528.614	1927.18	0.233888		250.048	2192.43	0.0698545
		319.062	2904.56	0.0767643		210.57	1152.94	0.101809		180.824	1329.63	0.0624772
		349.731	2651.96	0.0965042		206.477	1986.58	0.0542489		259.281	2324	0.0698736
		138.529	2184.74	0.0162075		196.258	1785.76	0.0546533		336.167	2285.67	0.106545
		151.559	1904.35	0.0260346		166.365	2044.71	0.0318167		286.962	3077.19	0.0614489
		137.167	1289	0.0274228		183.876	2275.64	0.0365227		400.455	2370.18	0.13107
		149.846	2352.73	0.0200498		175.417	1330.82	0.0579651		247.5	3143.25	0.0470724
		151.833	1716	0.0292706		165.686	1050.99	0.0649056		209.943	3380.79	0.0321439
		147.952	927.857	0.0529059		174.246	1464.42	0.0513532		406.25	3396.62	0.091827
		144.346	1528.92	0.0278472		164.981	1705.02	0.0377472		506.938	3345.06	0.124475
		207.062	1951	0.0556196		183.75	1038.41	0.0853741		541.875	2573.62	0.177763
		138.81	1248.76	0.0298474		177.616	998.756	0.0822606		372.238	2175.43	0.129763
		182.562	2580.25	0.0314749		335.176	1593.46	0.155792		223.077	2404.61	0.0515932
		296.952	2247.43	0.0900579		435.42	2132.41	0.163866		618.935	3199.9	0.166651
		260.885	2269	0.0724036		355.058	1509.25	0.179478		516.619	3512.67	0.121183
		169.381	1385.29	0.0507222		250.459	2516.98	0.0605831		609.667	3090.17	0.169683
		180.161	1911.87	0.0418521		473.852	1745.11	0.226413		535.062	3319.94	0.134229
		346.762	2126.24	0.120265		573.966	2980.87	0.163695		446.938	2860.62	0.124585
		278.406	1889.03	0.097802		403.64	3016.51	0.102961		203.231	2961.42	0.0345225
		246.1	2732.75	0.0539218		261.226	2252.13	0.073135		527.917	3716.92	0.117447
		333.423	2315.69	0.103843		599.394	2527.05	0.205054		392.048	3328.91	0.0893422
		300.714	1935.86	0.107544		557.925	2396.51	0.198607		534.333	2768.29	0.161873
		199.627	2497.12	0.0397406		474.01	2264.66	0.17174		407.083	2813.83	0.111972
		187.216	1566.3	0.0566891		497.096	2576.82	0.159336		443.062	2592.88	0.136487
		192.885	1443.67	0.0661948		569.969	1612.91	0.31062		524.375	3460.88	0.125378
		194.027	2836.7	0.0327221		395.807	1805.13	0.172164		470.25	3565.12	0.105896
		249.581	2582.87	0.0586091		442.904	1741.26	0.207908		436.375	3670.38	0.0932302
		236.385	1699.96	0.0829471		418.356	1766.31	0.189877		141.095	1076.29	0.0375878
		269.838	2197.51	0.0791914		350.246	984.275	0.282452		137.238	699.571	0.0552426
		312.614	3486.02	0.0616061		493.057	2093.86	0.1962		130.676	752.824	0.0403188
		292.731	1976.08	0.100926		323.693	2473.53	0.0927635		177.818	1012.46	0.0812288
		414.55	2913.05	0.11067		335.286	3431.04	0.069467		164	918.812	0.0734917
		274	1316.38	0.140789		467.47	2266.2	0.168575		161.952	953.095	0.0680353
		338.333	2941.25	0.0825884		257.676	3258.92	0.0485778		145.25	1006	0.0452247
		372.562	2581.62	0.108517		424.732	1990.63	0.170557		358.667	1102.48	0.257145
		276.938	1566.44	0.118542		764.214	2228.11	0.312112		170.562	1181.06	0.061557
		260.231	1558.85	0.107587		332.087	2592.04	0.0917137		221.077	869	0.154153
		327.524	3307.81	0.0697172		200.085	2724.83	0.0364474		162.308	876.962	0.0753099
		309.432	2995.14	0.0710047		276.876	2693.31	0.0666882		185.143	941.048	0.0971374
		235.205	2100.3	0.0656178		260.856	2880.33	0.0563812		147.238	642.857	0.0801698
		454.905	2387.29	0.154056		516.204	1675.91	0.263607		181.265	879.735	0.0998579
		371.619	2758.62	0.100892		334.116	1509.8	0.164383		174.7	971.75	0.081449
		343.083	2025.83	0.124662		174.15	2253.35	0.0323531		166.875	783.25	0.0927314
		333.953	3035.7	0.0784165		164.029	2374.37	0.0261379		268.429	1224.29	0.147461
		190.938	1487.25	0.0626713		200.538	1444.63	0.0719069		256.714	947.81	0.18239
		260.786	1281.07	0.133714		295.725	713.804	0.319043		188.083	891.083	0.107192
		324.5	1412.81	0.169261		453.472	1811.93	0.205475		310.375	1078.06	0.213474
		427.188	3038.16	0.110257		507.057	1201.8	0.370286		188.808	783.115	0.125628
		495.417	2467.17	0.166052		294.594	1312.48	0.15846		222.885	1114.88	0.118017
		380.385	2097.35	0.138989		203.213	1775.08	0.0591974		182.308	707.346	0.130732
		330.423	1126.15	0.223157		180.367	1241.43	0.0669671		244.188	1024.19	0.153259
		396.375	2812.44	0.108059		348.857	2119.02	0.121745		167.969	530.625	0.15187
		392.344	2512.41	0.119906		586.038	1691.77	0.305271		166.462	523.577	0.150798
		334.812	3125.25	0.0763685		451.616	2851.62	0.126705		133.938	459.438	0.0842597
		336.05	2532.1	0.0956293		473.203	3136.42	0.121905		137.143	552.095	0.0737064
		298.912	2498.53	0.0813891		487.613	2925.95	0.136164		143.25	541.25	0.0899471
		296.194	1110.71	0.192211		340.589	1653.42	0.153236		156	456.429	0.149811
		288.677	1407.55	0.142215		270.429	1569.85	0.113787		126.25	287.875	0.123636
		227.353	1509.09	0.0878286		249.675	1433.21	0.109834		192.412	474.647	0.243727
		167.577	1235.92	0.0558762		301.997	1328.26	0.162504		208.375	469.062	0.292796
		222.962	1934.04	0.0648842		165.909	1619.7	0.040506		209.471	582.265	0.224059
		273.885	2742.54	0.0642995		380.511	1145.84	0.267529		172.692	564.923	0.150788
		194.455	2617.82	0.035756		417.587	1454.7	0.233501		208.538	556.231	0.23519
		211.429	1378.29	0.0843145		1403.45	3738.31	0.358459		126.808	361.231	0.0889284
		160.75	1042.83	0.0601511		195.229	1682.47	0.0576002		187.75	440.417	0.255073
		209.654	1062.69	0.110547		620.212	2172.17	0.250569		190.875	430.875	0.272727
		187.375	1214.06	0.0750185		285.354	3123.15	0.0599751		138.333	364.714	0.134021
		195.125	1280.69	0.0773812		800.684	1838.41	0.403901		125.8	368.75	0.0822948
		158.731	693.923	0.0929726		637	1537.19	0.374335		125.905	406.952	0.0718503
		155.048	1071.81	0.0523619		706.33	2601.13	0.241971		171.688	553	0.152604
		145.583	852.667	0.05509		744.902	3049.45	0.21814		163.719	600.562	0.12118
		129.812	927.25	0.0305849		687.939	2701.05	0.225504		176.812	397.25	0.255332
		136.375	997.312	0.0356003		518.905	2201.33	0.198484		134.25	394.75	0.104933
		145.844	1206.41	0.0374576		230.139	1287.78	0.106794
		174.344	1387.5	0.0545372		216.551	1204.45	0.102486
		130.094	639.875	0.0479007		262.804	1851.12	0.0909468
		122.333	581.833	0.0372086		225.18	1398.41	0.0937142
		181.81	1286	0.0656496		358.482	1908.35	0.141424
		169.5	920.875	0.0801367		504.616	1546.03	0.279445
		142.659	823.295	0.0532437		317.071	2681.27	0.0826701
		124.312	488.188	0.0518878		307.795	2508.73	0.0847548
		124.286	620.238	0.0382478		283.937	2754.33	0.067822
						288.463	3521.22	0.053877
						197.692	2466.97	0.0394272
						378.633	2665.55	0.107326
						535.66	1971.12	0.232146
						410.154	2835.55	0.112208
						285.621	3099.41	0.0605418
						224.636	3274.29	0.03788
						185.451	2073.61	0.0410966
						199.786	2705.7	0.0366011
						185.363	2387.38	0.0353807
						229.315	2527.95	0.0515412
						176.688	1458.22	0.0534101
						173.353	1252.35	0.0601512
						535.021	1959.01	0.233326
						474.808	2017.31	0.194502
						511.906	1862.3	0.233011
						185.926	1590.72	0.0548754
						251.705	2459.21	0.0626085
						229.387	2124.04	0.0619446
						186.235	1574.29	0.0557057
						163.766	1853.53	0.0338216
						182.417	1631.66	0.0510782
						1427.14	3781.07	0.360741
						1144.29	3307.61	0.325631
						1175.86	2616.69	0.428226
						224.589	1075.37	0.124654
						411.295	2675.23	0.119683
						336.018	2246.42	0.108438
						351.726	2197.38	0.11854
						473.139	2714.91	0.141651
						403.576	2561.04	0.122115
						401.365	2315.27	0.134756
						397.832	3060.77	0.0994415
						316.88	2618.35	0.0846725
						440.652	2194.21	0.16151
						410.419	1540.9	0.214344
						408.801	1681.65	0.194041
						325.229	1695.79	0.139404
						527.261	2076.06	0.215432
						491.117	1965.79	0.208736
						370.266	976.219	0.30837
						456.75	1269.61	0.304912
						439.19	1323.48	0.276766
						286.737	2810.83	0.0674391
						246.197	3389.59	0.0431322
						313.919	3660.91	0.058935
						323.313	3639.48	0.0619596
						433.114	1923.1	0.181569
						476.094	2267.55	0.172477
						330.283	1739.03	0.138804
						426.528	1188.85	0.299696
						571.587	1618.26	0.31059
						563.759	2379.71	0.202658
						415.163	1770.39	0.187478
						315.632	2900.17	0.0756533
						430.635	2274.33	0.150874
						235.831	2345.85	0.0586725
